# Supplementary material for: Spaceflight alters host-gut microbiota interactions
Source: Research Square preprint supplement (doi:10.21203/rs.3.rs-3879489/v1), 2024-06-11
Supplement: Supplementary file 1 [file 46723152a669b7a4592eba74.xlsx]

## Sheet: raw_reads
Read_file	Read_number
FLT_ISS-T_NxtaFlex_Rep1_F3_R1	8529681
FLT_ISS-T_NxtaFlex_Rep1_F3_R2	8529681
FLT_ISS-T_NxtaFlex_Rep2_F4_R1	7449006
FLT_ISS-T_NxtaFlex_Rep2_F4_R2	7449006
FLT_ISS-T_NxtaFlex_Rep3_F5_R1	7326009
FLT_ISS-T_NxtaFlex_Rep3_F5_R2	7326009
FLT_ISS-T_NxtaFlex_Rep4_F7_R1	6452529
FLT_ISS-T_NxtaFlex_Rep4_F7_R2	6452529
FLT_ISS-T_NxtaFlex_Rep5_F8_R1	8593160
FLT_ISS-T_NxtaFlex_Rep5_F8_R2	8593160
FLT_ISS-T_NxtaFlex_Rep6_F9_R1	6690077
FLT_ISS-T_NxtaFlex_Rep6_F9_R2	6690077
FLT_ISS-T_NxtaFlex_Rep7_F10_R1	7703020
FLT_ISS-T_NxtaFlex_Rep7_F10_R2	7703020
FLT_LAR_NxtaFlex_Rep1_F1_R1	9099541
FLT_LAR_NxtaFlex_Rep1_F1_R2	9099541
FLT_LAR_NxtaFlex_Rep2_F2_R1	11803525
FLT_LAR_NxtaFlex_Rep2_F2_R2	11803525
FLT_LAR_NxtaFlex_Rep3_F3_R1	9821349
FLT_LAR_NxtaFlex_Rep3_F3_R2	9821349
FLT_LAR_NxtaFlex_Rep4_F4_R1	7390412
FLT_LAR_NxtaFlex_Rep4_F4_R2	7390412
FLT_LAR_NxtaFlex_Rep5_F5_R1	8886349
FLT_LAR_NxtaFlex_Rep5_F5_R2	8886349
FLT_LAR_NxtaFlex_Rep6_F6_R1	9265891
FLT_LAR_NxtaFlex_Rep6_F6_R2	9265891
FLT_LAR_NxtaFlex_Rep7_F7_R1	8819191
FLT_LAR_NxtaFlex_Rep7_F7_R2	8819191
FLT_LAR_NxtaFlex_Rep8_F9_R1	11302179
FLT_LAR_NxtaFlex_Rep8_F9_R2	11302179
FLT_LAR_NxtaFlex_Rep9_F10_R1	9767444
FLT_LAR_NxtaFlex_Rep9_F10_R2	9767444
GC_ISS-T_NxtaFlex_Rep1_G2_R1	6405073
GC_ISS-T_NxtaFlex_Rep1_G2_R2	6405073
GC_ISS-T_NxtaFlex_Rep2_G3_R1	7190662
GC_ISS-T_NxtaFlex_Rep2_G3_R2	7190662
GC_ISS-T_NxtaFlex_Rep3_G4_R1	7092188
GC_ISS-T_NxtaFlex_Rep3_G4_R2	7092188
GC_ISS-T_NxtaFlex_Rep4_G5_R1	8572797
GC_ISS-T_NxtaFlex_Rep4_G5_R2	8572797
GC_ISS-T_NxtaFlex_Rep5_G6_R1	7266195
GC_ISS-T_NxtaFlex_Rep5_G6_R2	7266195
GC_ISS-T_NxtaFlex_Rep6_G7_R1	8191890
GC_ISS-T_NxtaFlex_Rep6_G7_R2	8191890
GC_ISS-T_NxtaFlex_Rep7_G8_R1	8781637
GC_ISS-T_NxtaFlex_Rep7_G8_R2	8781637
GC_ISS-T_NxtaFlex_Rep8_G9_R1	9607413
GC_ISS-T_NxtaFlex_Rep8_G9_R2	9607413
GC_ISS-T_NxtaFlex_Rep9_G10_R1	6476250
GC_ISS-T_NxtaFlex_Rep9_G10_R2	6476250
GC_LAR_NxtaFlex_Rep1_G2_R1	9968271
GC_LAR_NxtaFlex_Rep1_G2_R2	9968271
GC_LAR_NxtaFlex_Rep2_G3_R1	9502637
GC_LAR_NxtaFlex_Rep2_G3_R2	9502637
GC_LAR_NxtaFlex_Rep3_G4_R1	9462023
GC_LAR_NxtaFlex_Rep3_G4_R2	9462023
GC_LAR_NxtaFlex_Rep4_G5_R1	8870583
GC_LAR_NxtaFlex_Rep4_G5_R2	8870583
GC_LAR_NxtaFlex_Rep5_G8_R1	11116092
GC_LAR_NxtaFlex_Rep5_G8_R2	11116092
GC_LAR_NxtaFlex_Rep6_G9_R1	10237615
GC_LAR_NxtaFlex_Rep6_G9_R2	10237615
GC_LAR_NxtaFlex_Rep7_G10_R1	10115388
GC_LAR_NxtaFlex_Rep7_G10_R2	10115388
AVERAGE	8.67988e+06

## Sheet: reads_QCStats
Read	Total_Sequences	Sequences_flagged_as_poor_quality	Sequence_length	Basic_Statistics	Per_base_sequence_quality	Per_sequence_quality_scores	Per_base_sequence_content	Per_sequence_GC_content	Per_base_N_content	Sequence_Length_Distribution	Sequence_Duplication_Levels	Overrepresented_sequences	Adapter_Content	Kmer_Content
FLT_ISS_Rep2_R1_fastqc	7449006	0	251	pass	pass	pass	fail	fail	pass	pass	pass	warn	fail	fail
FLT_ISS_Rep2_R2_fastqc	7449006	0	251	pass	pass	pass	fail	fail	pass	pass	pass	warn	fail	fail
FLT_ISS_Rep3_R1_fastqc	7326009	0	251	pass	pass	pass	fail	fail	pass	pass	pass	warn	fail	fail
FLT_ISS_Rep3_R2_fastqc	7326009	0	251	pass	pass	pass	fail	fail	pass	pass	pass	warn	fail	fail
FLT_ISS_Rep4_R1_fastqc	6452529	0	251	pass	pass	pass	fail	fail	pass	pass	pass	warn	fail	fail
FLT_ISS_Rep4_R2_fastqc	6452529	0	251	pass	pass	pass	fail	fail	pass	pass	pass	warn	fail	fail
FLT_ISS_Rep5_R1_fastqc	8593160	0	251	pass	pass	pass	fail	pass	pass	pass	pass	warn	fail	fail
FLT_ISS_Rep5_R2_fastqc	8593160	0	251	pass	pass	pass	fail	pass	pass	pass	pass	warn	fail	fail
FLT_ISS_Rep6_R1_fastqc	6690077	0	251	pass	pass	pass	fail	fail	pass	pass	pass	warn	fail	fail
FLT_ISS_Rep6_R2_fastqc	6690077	0	251	pass	pass	pass	fail	fail	pass	pass	pass	warn	fail	fail
FLT_ISS_Rep7_R1_fastqc	7703020	0	251	pass	pass	pass	fail	fail	pass	pass	pass	warn	fail	fail
FLT_ISS_Rep7_R2_fastqc	7703020	0	251	pass	pass	pass	fail	fail	pass	pass	pass	warn	fail	fail
FLT_LAR_Rep1_R1_fastqc	9099541	0	251	pass	pass	pass	fail	pass	pass	pass	warn	pass	fail	fail
FLT_LAR_Rep1_R2_fastqc	9099541	0	251	pass	pass	pass	fail	pass	pass	pass	warn	pass	fail	fail
FLT_LAR_Rep2_R1_fastqc	11803525	0	251	pass	pass	pass	fail	pass	pass	pass	warn	pass	fail	fail
FLT_LAR_Rep2_R2_fastqc	11803525	0	251	pass	pass	pass	fail	pass	pass	pass	warn	pass	fail	fail
FLT_LAR_Rep3_R2_fastqc	9821349	0	251	pass	pass	pass	fail	pass	pass	pass	warn	pass	fail	fail
FLT_LAR_Rep4_R1_fastqc	7390412	0	251	pass	pass	pass	fail	warn	pass	pass	pass	warn	warn	fail
FLT_LAR_Rep4_R2_fastqc	7390412	0	251	pass	pass	pass	fail	warn	pass	pass	pass	warn	fail	fail
FLT_LAR_Rep5_R1_fastqc	8886349	0	251	pass	pass	pass	fail	warn	pass	pass	warn	pass	fail	fail
FLT_LAR_Rep5_R2_fastqc	8886349	0	251	pass	pass	pass	fail	warn	pass	pass	warn	pass	fail	fail
FLT_LAR_Rep6_R1_fastqc	9265891	0	251	pass	pass	pass	fail	warn	pass	pass	warn	pass	warn	fail
FLT_LAR_Rep6_R2_fastqc	9265891	0	251	pass	pass	pass	fail	warn	pass	pass	warn	pass	warn	fail
FLT_LAR_Rep7_R1_fastqc	8819191	0	251	pass	pass	pass	fail	warn	pass	pass	warn	pass	fail	fail
FLT_LAR_Rep7_R2_fastqc	8819191	0	251	pass	pass	pass	fail	warn	pass	pass	warn	pass	fail	fail
FLT_LAR_Rep8_R1_fastqc	11302179	0	251	pass	pass	pass	fail	warn	pass	pass	warn	pass	warn	fail
FLT_LAR_Rep8_R2_fastqc	11302179	0	251	pass	pass	pass	fail	warn	pass	pass	warn	pass	warn	fail
FLT_LAR_Rep9_R1_fastqc	9767444	0	251	pass	pass	pass	fail	warn	pass	pass	warn	pass	warn	fail
FLT_LAR_Rep9_R2_fastqc	9767444	0	251	pass	pass	pass	fail	warn	pass	pass	warn	pass	warn	fail
GC_ISS_Rep1_R1_fastqc	6405073	0	251	pass	pass	pass	fail	fail	pass	pass	pass	warn	fail	fail
GC_ISS_Rep1_R2_fastqc	6405073	0	251	pass	pass	pass	fail	fail	pass	pass	pass	warn	fail	fail
GC_ISS_Rep2_R1_fastqc	7190662	0	251	pass	pass	pass	fail	fail	pass	pass	pass	warn	fail	fail
GC_ISS_Rep2_R2_fastqc	7190662	0	251	pass	pass	pass	fail	fail	pass	pass	pass	warn	fail	fail
GC_ISS_Rep3_R1_fastqc	7092188	0	251	pass	pass	pass	fail	fail	pass	pass	pass	warn	fail	fail
GC_ISS_Rep3_R2_fastqc	7092188	0	251	pass	pass	pass	fail	fail	pass	pass	pass	warn	fail	fail
GC_ISS_Rep4_R1_fastqc	8572797	0	251	pass	pass	pass	fail	fail	pass	pass	pass	warn	fail	fail
GC_ISS_Rep4_R2_fastqc	8572797	0	251	pass	pass	pass	fail	fail	pass	pass	pass	warn	fail	fail
GC_ISS_Rep5_R1_fastqc	7266195	0	251	pass	pass	pass	fail	fail	pass	pass	pass	warn	fail	fail
GC_ISS_Rep5_R2_fastqc	7266195	0	251	pass	pass	pass	fail	fail	pass	pass	pass	warn	fail	fail
GC_ISS_Rep6_R1_fastqc	8191890	0	251	pass	pass	pass	fail	warn	pass	pass	pass	warn	fail	fail
GC_ISS_Rep6_R2_fastqc	8191890	0	251	pass	pass	pass	fail	warn	pass	pass	pass	warn	fail	fail
GC_ISS_Rep7_R1_fastqc	8781637	0	251	pass	pass	pass	fail	warn	pass	pass	pass	warn	fail	fail
GC_ISS_Rep7_R2_fastqc	8781637	0	251	pass	pass	pass	fail	warn	pass	pass	pass	warn	fail	fail
GC_ISS_Rep8_R1_fastqc	9607413	0	251	pass	pass	pass	fail	pass	pass	pass	warn	pass	fail	fail
GC_ISS_Rep8_R2_fastqc	9607413	0	251	pass	pass	pass	fail	pass	pass	pass	warn	pass	fail	fail
GC_ISS_Rep9_R1_fastqc	6476250	0	251	pass	pass	pass	fail	fail	pass	pass	pass	warn	fail	fail
GC_ISS_Rep9_R2_fastqc	6476250	0	251	pass	pass	pass	fail	fail	pass	pass	pass	warn	fail	fail
GC_LAR_Rep1_R1_fastqc	9968271	0	251	pass	pass	pass	fail	pass	pass	pass	warn	pass	fail	fail
GC_LAR_Rep1_R2_fastqc	9968271	0	251	pass	pass	pass	fail	pass	pass	pass	warn	pass	fail	fail
GC_LAR_Rep2_R1_fastqc	9502637	0	251	pass	pass	pass	fail	pass	pass	pass	warn	pass	fail	fail
GC_LAR_Rep2_R2_fastqc	9502637	0	251	pass	pass	pass	fail	pass	pass	pass	warn	pass	fail	fail
GC_LAR_Rep3_R1_fastqc	9462023	0	251	pass	pass	pass	fail	pass	pass	pass	warn	pass	fail	fail
GC_LAR_Rep3_R2_fastqc	9462023	0	251	pass	pass	pass	fail	pass	pass	pass	warn	pass	fail	fail
GC_LAR_Rep4_R1_fastqc	8870583	0	251	pass	pass	pass	fail	pass	pass	pass	warn	pass	fail	fail
GC_LAR_Rep4_R2_fastqc	8870583	0	251	pass	pass	pass	fail	pass	pass	pass	warn	pass	fail	fail
GC_LAR_Rep5_R1_fastqc	11116092	0	251	pass	pass	pass	fail	pass	pass	pass	warn	pass	fail	fail
GC_LAR_Rep5_R2_fastqc	11116092	0	251	pass	pass	pass	fail	pass	pass	pass	warn	pass	fail	fail
GC_LAR_Rep6_R1_fastqc	10237615	0	251	pass	pass	pass	fail	pass	pass	pass	warn	pass	fail	fail
GC_LAR_Rep6_R2_fastqc	10237615	0	251	pass	pass	pass	fail	pass	pass	pass	warn	pass	fail	fail
GC_LAR_Rep7_R1_fastqc	10115388	0	251	pass	pass	pass	fail	pass	pass	pass	warn	pass	warn	fail
GC_LAR_Rep7_R2_fastqc	10115388	0	251	pass	pass	pass	fail	pass	pass	pass	warn	pass	warn	fail

## Sheet: reads_QCtrimgalore
Sample	Initial_Reads	trimmed_reads	Percentage
FLT_ISS_Rep1	8529681	8513800	99.81
FLT_ISS_Rep2	7449006	7435084	99.81
FLT_ISS_Rep3	7326009	7311492	99.8
FLT_ISS_Rep4	6452529	6439600	99.79
FLT_ISS_Rep5	8593160	8579038	99.83
FLT_ISS_Rep6	6690077	6676958	99.8
FLT_ISS_Rep7	7703020	7688394	99.81
FLT_LAR_Rep1	9099541	9087482	99.86
FLT_LAR_Rep2	11803525	11786082	99.85
FLT_LAR_Rep3	9821349	9807513	99.85
FLT_LAR_Rep4	7390412	7377311	99.82
FLT_LAR_Rep5	8886349	8871662	99.83
FLT_LAR_Rep6	9265891	9250602	99.83
FLT_LAR_Rep7	8819191	8804692	99.83
FLT_LAR_Rep8	11302179	11285673	99.85
FLT_LAR_Rep9	9767444	9751640	99.83
GC_ISS_Rep1	6405073	6393143	99.81
GC_ISS_Rep2	7190662	7177403	99.81
GC_ISS_Rep3	7092188	7080032	99.82
GC_ISS_Rep4	8572797	8557297	99.81
GC_ISS_Rep5	7266195	7251495	99.79
GC_ISS_Rep6	8191890	8177299	99.82
GC_ISS_Rep7	8781637	8766686	99.82
GC_ISS_Rep8	9607413	9592794	99.84
GC_ISS_Rep9	6476250	6463209	99.79
GC_LAR_Rep1	9968271	9953363	99.85
GC_LAR_Rep2	9502637	9488029	99.84
GC_LAR_Rep3	9462023	9446579	99.83
GC_LAR_Rep4	8870583	8857436	99.85
GC_LAR_Rep5	11116092	11100369	99.85
GC_LAR_Rep6	10237615	10221638	99.84
GC_LAR_Rep7	10115388	10100283	99.85
TOTAL	277756077	277294078	NA
AVERAGE	8.67988e+06	8.66544e+06	99.8256

## Sheet: remove_human_reads_BBMAP
Sample	R1_mapped_to_human	R2_mapped_to_human	non-Human_reads
FLT_ISS_Rep1	0.001612	0.001612	8500078
FLT_ISS_Rep2	0.001743	0.001743	7422122
FLT_ISS_Rep3	0.001425	0.001425	7301076
FLT_ISS_Rep4	0.001619	0.001619	6429173
FLT_ISS_Rep5	0.000504	0.000504	8574713
FLT_ISS_Rep6	0.001378	0.001378	6667759
FLT_ISS_Rep7	0.002001	0.002001	7673013
FLT_LAR_Rep1	6.2e-05	6.2e-05	9086921
FLT_LAR_Rep2	0.000294	0.000294	11782613
FLT_LAR_Rep3	0.000272	0.000272	9804846
FLT_LAR_Rep4	0.000486	0.000486	7373729
FLT_LAR_Rep5	0.000306	0.000306	8868943
FLT_LAR_Rep6	0.000254	0.000254	9248250
FLT_LAR_Rep7	0.000463	0.000463	8800613
FLT_LAR_Rep8	4.1e-05	4.1e-05	11285213
FLT_LAR_Rep9	0.000205	0.000205	9749637
GC_ISS_Rep1	0.0023	0.0023	6378440
GC_ISS_Rep2	0.001743	0.001743	7164890
GC_ISS_Rep3	0.001325	0.001325	7070649
GC_ISS_Rep4	0.001313	0.001313	8546065
GC_ISS_Rep5	0.001588	0.001588	7239983
GC_ISS_Rep6	0.000724	0.000724	8171378
GC_ISS_Rep7	0.000749	0.000749	8760122
GC_ISS_Rep8	0.000179	0.000179	9591075
GC_ISS_Rep9	0.001054	0.001054	6456397
GC_LAR_Rep1	0.000435	0.000435	9949036
GC_LAR_Rep2	0.000501	0.000501	9483280
GC_LAR_Rep3	0.000701	0.000701	9439954
GC_LAR_Rep4	0.000271	0.000271	8855033
GC_LAR_Rep5	0.000105	0.000105	11099198
GC_LAR_Rep6	0.000209	0.000209	10219501
GC_LAR_Rep7	7.1e-05	7.1e-05	10099566

## Sheet: rRNA_removal_SortmeRNA
Sample	Initial_Reads	Non_rRNA_reads	Non-rRNA_reads_Percentage
FLT_ISS_Rep1	8500078	8490301	99.88
FLT_ISS_Rep2	7422122	7414530	99.89
FLT_ISS_Rep3	7301076	7295280	99.92
FLT_ISS_Rep4	6429173	6426705	99.96
FLT_ISS_Rep5	8574713	8553977	99.75
FLT_ISS_Rep6	6667759	6662678	99.92
FLT_ISS_Rep7	7673013	7669598	99.95
FLT_LAR_Rep1	9086921	9049758	99.59
FLT_LAR_Rep2	11782613	11737765	99.61
FLT_LAR_Rep3	9804846	9767640	99.62
FLT_LAR_Rep4	7373729	7352772	99.71
FLT_LAR_Rep5	8868943	8837100	99.64
FLT_LAR_Rep6	9248250	9216301	99.65
FLT_LAR_Rep7	8800613	8770895	99.66
FLT_LAR_Rep8	11285213	11236597	99.56
FLT_LAR_Rep9	9749637	9711899	99.61
GC_ISS_Rep1	6378440	6376739	99.97
GC_ISS_Rep2	7164890	7159010	99.91
GC_ISS_Rep3	7070649	7056757	99.8
GC_ISS_Rep4	8546065	8533166	99.84
GC_ISS_Rep5	7239983	7235838	99.94
GC_ISS_Rep6	8171378	8153027	99.77
GC_ISS_Rep7	8760122	8737660	99.74
GC_ISS_Rep8	9591075	9552961	99.6
GC_ISS_Rep9	6456397	6449044	99.88
GC_LAR_Rep1	9949036	9911983	99.62
GC_LAR_Rep2	9483280	9450608	99.65
GC_LAR_Rep3	9439954	9411717	99.7
GC_LAR_Rep4	8855033	8819702	99.6
GC_LAR_Rep5	11099198	11054436	99.59
GC_LAR_Rep6	10219501	10177008	99.58
GC_LAR_Rep7	10099566	10055999	99.56

## Sheet: co-assembly_megahit
RAW ASSEMBLY
Number of Contigs	3547996	contigs
Total raw counts	235192707	counts
Total length of contigs	3414464219	bp
Shortest	200	bp
Longest	708161	bp
Average length	962.4	bp
Average GC%	41.9	%
Non-ACGT bases	0
N25 stats	5678	bp
N50 stats	2641	bp
N75 stats	555	bp
Total raw counts are estimated from Kallisto (see Kallisto tab)

## Sheet: abundance_Kallisto
Sample	InitialReads	MappedReads	BackMappingPerc
FLT_ISS_Rep1	8490301	6810917	80.21
FLT_ISS_Rep2	7414530	5960335	80.38
FLT_ISS_Rep3	7295280	5678941	77.84
FLT_ISS_Rep4	6426705	4873930	75.83
FLT_ISS_Rep5	8553977	7032111	82.2
FLT_ISS_Rep6	6662678	5138929	77.13
FLT_ISS_Rep7	7669598	5949604	77.57
FLT_LAR_Rep1	9049758	7976441	88.13
FLT_LAR_Rep2	11737765	10630220	90.56
FLT_LAR_Rep3	9767640	8558171	87.61
FLT_LAR_Rep4	7352772	6217010	84.55
FLT_LAR_Rep5	8837100	7794259	88.19
FLT_LAR_Rep6	9216301	7941519	86.16
FLT_LAR_Rep7	8770895	7613741	86.8
FLT_LAR_Rep8	11236597	10053568	89.47
FLT_LAR_Rep9	9711899	8658249	89.15
GC_ISS_Rep1	6376739	4931746	77.33
GC_ISS_Rep2	7159010	5571365	77.82
GC_ISS_Rep3	7056757	5863758	83.09
GC_ISS_Rep4	8533166	6900980	80.87
GC_ISS_Rep5	7235838	5598041	77.36
GC_ISS_Rep6	8153027	6748658	82.77
GC_ISS_Rep7	8737660	7451812	85.28
GC_ISS_Rep8	9552961	8627726	90.31
GC_ISS_Rep9	6449044	5088037	78.89
GC_LAR_Rep1	9911983	8883594	89.62
GC_LAR_Rep2	9450608	8406176	88.94
GC_LAR_Rep3	9411717	8020859	85.22
GC_LAR_Rep4	8819702	7960907	90.26
GC_LAR_Rep5	11054436	9898760	89.54
GC_LAR_Rep6	10177008	9235193	90.74
GC_LAR_Rep7	10055999	9117156	90.66

## Sheet: filter_abund_and_mouse
Sample	Total Raw Count		COUNT FILTERED ASSEMBLY	Filter: raw count filter (>=1 across samples)
FLT_ISS_Rep1	1.9296e+06		Total number of contigs	1296741	contigs
FLT_ISS_Rep2	1.61939e+06		Total raw counts	235192707	counts
FLT_ISS_Rep3	1.1726e+06		Total length of contigs	2664442205	bp
FLT_ISS_Rep4	493619		Shortest	200	bp
FLT_ISS_Rep5	4.37142e+06		Longest	708161	bp
FLT_ISS_Rep6	1.08056e+06		Average length	2054.7	bp
FLT_ISS_Rep7	717867		Average GC%	42.5	%
FLT_LAR_Rep1	7.72846e+06		Non-ACGT bases	0
FLT_LAR_Rep2	9.30453e+06		N25 stats	6788	bp
FLT_LAR_Rep3	7.52692e+06		N50 stats	3750	bp
FLT_LAR_Rep4	4.13823e+06		N75 stats	1880	bp
FLT_LAR_Rep5	6.3503e+06		Large number of small empty contigs removed (positive impact for downstream analysis)
FLT_LAR_Rep6	6.5019e+06
FLT_LAR_Rep7	5.75248e+06		MOUSE FILTERED ASSEMBLY	Filter:minimap2 vs mouse genome
FLT_LAR_Rep8	9.79129e+06		Total number of contigs	2155640	contigs
FLT_LAR_Rep9	7.44882e+06		Total raw counts	154692394	counts
GC_ISS_Rep1	367031		Total length of contigs	973319681	bp
GC_ISS_Rep2	1.17391e+06		Shortest	200	bp
GC_ISS_Rep3	2.85778e+06		Longest	708161	bp
GC_ISS_Rep4	2.6764e+06		Average length	451.5	bp
GC_ISS_Rep5	836933		Average GC%	41.9	%
GC_ISS_Rep6	3.71375e+06		Non-ACGT bases	0
GC_ISS_Rep7	4.64698e+06		N25 stats	1021	bp
GC_ISS_Rep8	7.78524e+06		N50 stats	404	bp
GC_ISS_Rep9	1.47594e+06		N75 stats	318	bp
GC_LAR_Rep1	7.43232e+06		Filter using minimap2 and mouse genome GCA_000001635.9_GRCm39
GC_LAR_Rep2	6.68162e+06		Large contigs with high counts removed (expected, good map)
GC_LAR_Rep3	5.54382e+06
GC_LAR_Rep4	7.05897e+06		MOUSE + COUNT FILTERED ASSEMBLY (used for post-hoc analysis: DA, diversity, etc.)	Filter: minimap2 vs mouse genome + raw count filter (>0 across samples)
GC_LAR_Rep5	9.40777e+06		Total number of contigs	219259	contigs
GC_LAR_Rep6	8.3953e+06		Total raw counts	154692394	counts
GC_LAR_Rep7	8.71066e+06		Total length of contigs	323912108	bp
			Shortest	200	bp
			Longest	708161	bp
			Average length	1477.3	bp
			Average GC%	46.7	%
			Non-ACGT bases	0
			N25 stats	59018	bp
			N50 stats	17162	bp
			N75 stats	1031	bp
			Filter using minimap2 and mouse genome GCA_000001635.9_GRCm39

## Sheet: Sparsity_filter
Filters				Condition	Initial_number_of_Contigs	Sparsed_contigs	Remaining_Contigs	Total raw Count	% count left
Minimum sample with counts from a same factor (note: doesn't apply to Full table)	3	samples minimum		Full_table	219259	173369	45890	1.54692e+08	1
sparsity	90	% (and a bove) of counts in a single sample		GC_ISS_vs_FLT_ISS	219259	195741	23518	1.52913e+08	98.8495
Mouse filter	non-mouse contigs	(see co-assembly TAB)		GC_LAR_vs_FLT_LAR	219259	185831	33428	1.54066e+08	99.5948
				GC_vs_FLT	219259	173439	45820	1.54229e+08	99.7007
Filters				Condition	Initial_number_of_Contigs	Sparsed_contigs	Remaining_Contigs
Minimum sample with counts from a same factor (note: doesn't apply to Full table)	3	samples minimum		Full_table	219259	173369	45890
sparsity	95	% (and a bove) of counts in a single sample		GC_ISS_vs_FLT_ISS	219259	195735	23524
Mouse filter	non-mouse contigs	(see co-assembly TAB)		GC_LAR_vs_FLT_LAR	219259	185804	33455
				GC_vs_FLT	219259	173398	45861
Filters				Condition	Initial_number_of_Contigs	Sparsed_contigs	Remaining_Contigs
Minimum sample with counts from a same factor (note: doesn't apply to Full table)	3	samples minimum		Full_table	219259	173369	45890
sparsity	99	% (and a bove) of counts in a single sample		GC_ISS_vs_FLT_ISS	219259	195731	23528
Mouse filter	non-mouse contigs	(see co-assembly TAB)		GC_LAR_vs_FLT_LAR	219259	185803	33456
				GC_vs_FLT	219259	173391	45868
Little effect of varying sparsity threshold from 90-99%
Sample specific data is readily removed (positive effect on downstream analysis)
Sparsity overview (samples with a count per contig)
Occurrence (of contig across samples)	Number of contigs	% Number of contigs	Cumulative raw count	% Cumulative raw count
32	2536	1.15662	135991193	87.9107
31	1937	0.88343	6645812	4.29615
30	1108	0.505338	1844765	1.19254
29	931	0.424612	2310394	1.49354
28	692	0.315608	1489031	0.962575
27	646	0.294629	449253	0.290417
26	564	0.25723	301576	0.194952
25	564	0.25723	240466	0.155448
24	502	0.228953	257814	0.166662
23	499	0.227585	121108	0.0782896
22	492	0.224392	128348	0.0829698
21	494	0.225304	95207	0.061546
20	488	0.222568	86973	0.0562232
19	514	0.234426	190254	0.122989
18	490	0.22348	194784	0.125917
17	486	0.221656	192528	0.124459
16	569	0.25951	223909	0.144745
15	567	0.258598	255757	0.165333
14	635	0.289612	449782	0.290759
13	715	0.326098	410603	0.265432
12	786	0.35848	424371	0.274332
11	989	0.451065	464624	0.300353
10	1186	0.540913	432644	0.27968
9	1446	0.659494	207787	0.134323
8	1968	0.897569	264034	0.170683
7	2487	1.13427	185715	0.120054
6	3363	1.5338	122223	0.0790103
5	4862	2.21747	98053	0.0633858
4	8955	4.08421	104609	0.0676239
3	15262	6.96072	107575	0.0695412
2	37043	16.8946	154482	0.099864	Minimum occurance >3 filters high numbers of low count and sparse contigs (positive effect on downstream analysis)
1	125483	57.2305	246729	0.159497
TOTAL	293	100	154692394	100

## Sheet: DA_DESeq2
Comparison	Factor1	Factor2	Contigs included	DA Contigs	DA contigs +logFC	DA contigs -logFC	outliers	low count contigs
FLT_ISS_vs_GC_ISS	FLT_ISS	GC_ISS	23518	915	681	234	0	0
FLT_LAR_vs_GC_LAR	FLT_LAR	GC_LAR	33428	2212	1067	1145	0	0

[truncated: 4 more sheets: Functional_annotation_summary, MAG_quality, checkM_run, MAG_contig_capture]
