# Supplementary material for: Spaceflight alters host-gut microbiota interactions
Source: Research Square preprint supplement (doi:10.21203/rs.3.rs-3879489/v1), 2024-06-11
Supplement: Supplementary file 2 [file 7af546189392ae56e65fd660.xlsx]

## Sheet: Contig annotation
contig	contig_length	blastn|database	blastn|LowestTaxon	blastn|sseqid	blastn|pident	blastn|qstart	blastn|qend	blastn|evalue	blastn|bitscore	blastn|qlen	blastn|stitle	blastn|qcov	blastn|region	blastn|NCBI_Tax
k127_5462418	2558	nt	S	CP001840.1	99.531	1	2558	0	4658	2558	CP001840.1 Bifidobacterium bifidum PRL2010; complete genome	100	1	Bacteria;Actinobacteria;Actinomycetia;Bifidobacteriales;Bifidobacteriaceae;Bifidobacterium;Bifidobacterium_bifidum
k127_2498123	1647	nt	S	CP021556.1	94.705	1	1647	0	2560	1647	CP021556.1 Bifidobacterium breve strain 139W423 chromosome; complete genome	100	1	Bacteria;Actinobacteria;Actinomycetia;Bifidobacteriales;Bifidobacteriaceae;Bifidobacterium;Bifidobacterium_breve
k127_3441834	34845	nt	S	CP006715.1	91.71	159	1122	0	1338	34845	CP006715.1 Bifidobacterium breve 689b; complete genome	2.76941	1	Bacteria;Actinobacteria;Actinomycetia;Bifidobacteriales;Bifidobacteriaceae;Bifidobacterium;Bifidobacterium_breve
k127_3562802	2967	nt	S	CP021556.1	99.966	1	2967	0	5474	2967	CP021556.1 Bifidobacterium breve strain 139W423 chromosome; complete genome	100	1	Bacteria;Actinobacteria;Actinomycetia;Bifidobacteriales;Bifidobacteriaceae;Bifidobacterium;Bifidobacterium_breve
k127_2167988	4697	nt	S	CP062943.1	96.581	2753	4503	0	2894	4697	CP062943.1 Bifidobacterium longum subsp. longum strain KCTC 5915 chromosome	37.3643	1	Bacteria;Actinobacteria;Actinomycetia;Bifidobacteriales;Bifidobacteriaceae;Bifidobacterium;Bifidobacterium_longum
k127_6820197	1460	nt	S	AP010889.1	94.231	1192	1450	4.6e-105	396	1460	AP010889.1 Bifidobacterium longum subsp. infantis ATCC 15697 = JCM 1222 = DSM 20088 DNA; complete genome	17.8082	2	Bacteria;Actinobacteria;Actinomycetia;Bifidobacteriales;Bifidobacteriaceae;Bifidobacterium;Bifidobacterium_longum
k127_198868	1180	nt	S	LR698979.1	100	1	1180	0	2180	1180	LR698979.1 Bifidobacterium thermophilum isolate MGYG-HGUT-02334 genome assembly; chromosome: 1 CP004346.1 Bifidobacterium thermophilum RBL67; complete genome	100	1	Bacteria;Actinobacteria;Actinomycetia;Bifidobacteriales;Bifidobacteriaceae;Bifidobacterium;Bifidobacterium_thermophilum
k127_4126894	339	nt	S	AM710602.1	100	1	339	3.2e-175	627	339	AM710602.1 Bifidobacterium thermophilum tet(W/32/O) gene; ORF1 and partial tnp gene; strain B0241	100	1	Bacteria;Actinobacteria;Actinomycetia;Bifidobacteriales;Bifidobacteriaceae;Bifidobacterium;Bifidobacterium_thermophilum
k127_4455904	22361	nt	F	AP024608.2	92.008	1	6126	0	8623	22361	AP024608.2 Atopobiaceae bacterium P1 DNA; complete genome	27.6419	1	Bacteria;Actinobacteria;Coriobacteriia;Coriobacteriales;Atopobiaceae;Atopobiaceae;Atopobiaceae
k127_1051667	4275	nt	S	AP024470.1	94.924	10	4149	0	6490	4275	AP024470.1 Adlercreutzia equolifaciens subsp. celatus JCM 14811 DNA; complete genome	97.2398	1	Bacteria;Actinobacteria;Coriobacteriia;Eggerthellales;Eggerthellaceae;Adlercreutzia;Adlercreutzia_equolifaciens
k127_1211386	11262	db_customA	S	AP024470.1	98.227	127	11236	0	19416	11262	AP024470.1 Adlercreutzia equolifaciens subsp. celatus JCM 14811 DNA; complete genome	98.677	1	Bacteria;Actinobacteria;Coriobacteriia;Eggerthellales;Eggerthellaceae;Adlercreutzia;Adlercreutzia_equolifaciens
k127_1212506	12156	db_customA	S	AP024470.1	97.64	1	12156	0	20862	12156	AP024470.1 Adlercreutzia equolifaciens subsp. celatus JCM 14811 DNA; complete genome	100	1	Bacteria;Actinobacteria;Coriobacteriia;Eggerthellales;Eggerthellaceae;Adlercreutzia;Adlercreutzia_equolifaciens
k127_1251241	17905	nt	S	AP024470.1	98.596	8436	17905	0	16746	17905	AP024470.1 Adlercreutzia equolifaciens subsp. celatus JCM 14811 DNA; complete genome	52.8958	1	Bacteria;Actinobacteria;Coriobacteriia;Eggerthellales;Eggerthellaceae;Adlercreutzia;Adlercreutzia_equolifaciens
k127_1704744	2713	db_customA	S	AP013105.1	98.454	1	2588	0	4558	2713	AP013105.1 Adlercreutzia equolifaciens DSM 19450 DNA; complete genome	95.3926	1	Bacteria;Actinobacteria;Coriobacteriia;Eggerthellales;Eggerthellaceae;Adlercreutzia;Adlercreutzia_equolifaciens
k127_1792389	59867	nt	S	AP013105.1	96.671	21309	41865	0	34147	59867	AP013105.1 Adlercreutzia equolifaciens DSM 19450 DNA; complete genome	34.3662	1	Bacteria;Actinobacteria;Coriobacteriia;Eggerthellales;Eggerthellaceae;Adlercreutzia;Adlercreutzia_equolifaciens
k127_1800460	1786	db_customA	S	AP013105.1	99.552	1	1786	0	3254	1786	AP013105.1 Adlercreutzia equolifaciens DSM 19450 DNA; complete genome	100	1	Bacteria;Actinobacteria;Coriobacteriia;Eggerthellales;Eggerthellaceae;Adlercreutzia;Adlercreutzia_equolifaciens
k127_1867788	2737	db_customA	S	AP024470.1	98.901	8	2737	0	4874	2737	AP024470.1 Adlercreutzia equolifaciens subsp. celatus JCM 14811 DNA; complete genome	99.7442	1	Bacteria;Actinobacteria;Coriobacteriia;Eggerthellales;Eggerthellaceae;Adlercreutzia;Adlercreutzia_equolifaciens
k127_1955134	3034	nt	S	AP013105.1	95.287	128	3034	0	4608	3034	AP013105.1 Adlercreutzia equolifaciens DSM 19450 DNA; complete genome	95.8141	2	Bacteria;Actinobacteria;Coriobacteriia;Eggerthellales;Eggerthellaceae;Adlercreutzia;Adlercreutzia_equolifaciens
k127_2241287	10505	db_customA	S	AP024470.1	99.419	10334	10505	1.88e-81	313	10505	AP024470.1 Adlercreutzia equolifaciens subsp. celatus JCM 14811 DNA; complete genome	1.63732	1	Bacteria;Actinobacteria;Coriobacteriia;Eggerthellales;Eggerthellaceae;Adlercreutzia;Adlercreutzia_equolifaciens
k127_2296131	46330	db_customA	S	AP013105.1	97.258	13704	26164	0	21119	46330	AP013105.1 Adlercreutzia equolifaciens DSM 19450 DNA; complete genome	26.9199	3	Bacteria;Actinobacteria;Coriobacteriia;Eggerthellales;Eggerthellaceae;Adlercreutzia;Adlercreutzia_equolifaciens
k127_234987	600	db_customA	S	AP013105.1	100	1	600	0	1109	600	AP013105.1 Adlercreutzia equolifaciens DSM 19450 DNA; complete genome	100	1	Bacteria;Actinobacteria;Coriobacteriia;Eggerthellales;Eggerthellaceae;Adlercreutzia;Adlercreutzia_equolifaciens
k127_3178866	3433	db_customA	S	AP013105.1	98.382	1	3276	0	5757	3433	AP013105.1 Adlercreutzia equolifaciens DSM 19450 DNA; complete genome	95.4267	1	Bacteria;Actinobacteria;Coriobacteriia;Eggerthellales;Eggerthellaceae;Adlercreutzia;Adlercreutzia_equolifaciens
k127_323181	103897	db_customA	S	AP013105.1	97.252	24368	43644	0	32692	103897	AP013105.1 Adlercreutzia equolifaciens DSM 19450 DNA; complete genome	18.6002	2	Bacteria;Actinobacteria;Coriobacteriia;Eggerthellales;Eggerthellaceae;Adlercreutzia;Adlercreutzia_equolifaciens
k127_3390740	1282	db_customA	S	AP024470.1	100	1	128	1.39e-59	237	1282	AP024470.1 Adlercreutzia equolifaciens subsp. celatus JCM 14811 DNA; complete genome	9.9844	1	Bacteria;Actinobacteria;Coriobacteriia;Eggerthellales;Eggerthellaceae;Adlercreutzia;Adlercreutzia_equolifaciens
k127_3412427	113045	db_customA	S	AP024470.1	98.576	1	19444	0	34372	113045	AP024470.1 Adlercreutzia equolifaciens subsp. celatus JCM 14811 DNA; complete genome	17.202	1	Bacteria;Actinobacteria;Coriobacteriia;Eggerthellales;Eggerthellaceae;Adlercreutzia;Adlercreutzia_equolifaciens
k127_3609987	20045	db_customA	S	AP013105.1	97.326	10659	20043	0	15937	20045	AP013105.1 Adlercreutzia equolifaciens DSM 19450 DNA; complete genome	46.8346	2	Bacteria;Actinobacteria;Coriobacteriia;Eggerthellales;Eggerthellaceae;Adlercreutzia;Adlercreutzia_equolifaciens
k127_4069669	12631	nt	S	AP024470.1	94.637	140	4259	0	6370	12631	AP024470.1 Adlercreutzia equolifaciens subsp. celatus JCM 14811 DNA; complete genome	32.6261	2	Bacteria;Actinobacteria;Coriobacteriia;Eggerthellales;Eggerthellaceae;Adlercreutzia;Adlercreutzia_equolifaciens
k127_4541445	14262	db_customA	S	AP013105.1	98.26	127	14261	0	24735	14262	AP013105.1 Adlercreutzia equolifaciens DSM 19450 DNA; complete genome	99.1376	1	Bacteria;Actinobacteria;Coriobacteriia;Eggerthellales;Eggerthellaceae;Adlercreutzia;Adlercreutzia_equolifaciens
k127_4579319	20213	db_customA	S	AP013105.1	97.488	3196	13862	0	18214	20213	AP013105.1 Adlercreutzia equolifaciens DSM 19450 DNA; complete genome	52.773	1	Bacteria;Actinobacteria;Coriobacteriia;Eggerthellales;Eggerthellaceae;Adlercreutzia;Adlercreutzia_equolifaciens
k127_4766026	21922	nt	S	AP024470.1	91.704	2477	20670	0	25220	21922	AP024470.1 Adlercreutzia equolifaciens subsp. celatus JCM 14811 DNA; complete genome	83.0262	2	Bacteria;Actinobacteria;Coriobacteriia;Eggerthellales;Eggerthellaceae;Adlercreutzia;Adlercreutzia_equolifaciens
k127_5064384	14661	db_customA	S	AP024470.1	99.306	242	14219	0	25276	14661	AP024470.1 Adlercreutzia equolifaciens subsp. celatus JCM 14811 DNA; complete genome	95.3414	1	Bacteria;Actinobacteria;Coriobacteriia;Eggerthellales;Eggerthellaceae;Adlercreutzia;Adlercreutzia_equolifaciens
k127_5102393	16960	db_customA	S	AP024470.1	98.035	2100	16601	0	25189	16960	AP024470.1 Adlercreutzia equolifaciens subsp. celatus JCM 14811 DNA; complete genome	85.5248	1	Bacteria;Actinobacteria;Coriobacteriia;Eggerthellales;Eggerthellaceae;Adlercreutzia;Adlercreutzia_equolifaciens
k127_5195430	10345	db_customA	S	AP013105.1	97.005	8042	10345	0	3873	10345	AP013105.1 Adlercreutzia equolifaciens DSM 19450 DNA; complete genome	22.2716	1	Bacteria;Actinobacteria;Coriobacteriia;Eggerthellales;Eggerthellaceae;Adlercreutzia;Adlercreutzia_equolifaciens
k127_5623626	87328	db_customA	S	AP024470.1	98.034	45316	87161	0	72729	87328	AP024470.1 Adlercreutzia equolifaciens subsp. celatus JCM 14811 DNA; complete genome	47.9445	2	Bacteria;Actinobacteria;Coriobacteriia;Eggerthellales;Eggerthellaceae;Adlercreutzia;Adlercreutzia_equolifaciens
k127_5624804	14038	nt	S	AP013105.1	96.722	1	12318	0	20510	14038	AP013105.1 Adlercreutzia equolifaciens DSM 19450 DNA; complete genome	87.7974	1	Bacteria;Actinobacteria;Coriobacteriia;Eggerthellales;Eggerthellaceae;Adlercreutzia;Adlercreutzia_equolifaciens
k127_5647988	11635	db_customA	S	AP024470.1	97.327	1	11632	0	19749	11635	AP024470.1 Adlercreutzia equolifaciens subsp. celatus JCM 14811 DNA; complete genome	100	1	Bacteria;Actinobacteria;Coriobacteriia;Eggerthellales;Eggerthellaceae;Adlercreutzia;Adlercreutzia_equolifaciens
k127_5748124	17178	db_customA	S	AP024470.1	98.624	4760	16950	0	21593	17178	AP024470.1 Adlercreutzia equolifaciens subsp. celatus JCM 14811 DNA; complete genome	71.0793	1	Bacteria;Actinobacteria;Coriobacteriia;Eggerthellales;Eggerthellaceae;Adlercreutzia;Adlercreutzia_equolifaciens
k127_6157121	46181	db_customA	S	AP013105.1	97.763	38315	46084	0	13393	46181	AP013105.1 Adlercreutzia equolifaciens DSM 19450 DNA; complete genome	16.8446	3	Bacteria;Actinobacteria;Coriobacteriia;Eggerthellales;Eggerthellaceae;Adlercreutzia;Adlercreutzia_equolifaciens
k127_6424090	30374	db_customA	S	AP013105.1	97.442	1484	20554	0	32496	30374	AP013105.1 Adlercreutzia equolifaciens DSM 19450 DNA; complete genome	62.807	1	Bacteria;Actinobacteria;Coriobacteriia;Eggerthellales;Eggerthellaceae;Adlercreutzia;Adlercreutzia_equolifaciens
k127_6967190	2762	nt	S	AP024470.1	96.671	1	2762	0	4591	2762	AP024470.1 Adlercreutzia equolifaciens subsp. celatus JCM 14811 DNA; complete genome	100	1	Bacteria;Actinobacteria;Coriobacteriia;Eggerthellales;Eggerthellaceae;Adlercreutzia;Adlercreutzia_equolifaciens
k127_6967251	1906	nt	S	AP013105.1	95.333	1	1906	0	3027	1906	AP013105.1 Adlercreutzia equolifaciens DSM 19450 DNA; complete genome	100	1	Bacteria;Actinobacteria;Coriobacteriia;Eggerthellales;Eggerthellaceae;Adlercreutzia;Adlercreutzia_equolifaciens
k127_70458	18509	nt	S	AP024470.1	95.587	6013	15306	0	14907	18509	AP024470.1 Adlercreutzia equolifaciens subsp. celatus JCM 14811 DNA; complete genome	50.4457	3	Bacteria;Actinobacteria;Coriobacteriia;Eggerthellales;Eggerthellaceae;Adlercreutzia;Adlercreutzia_equolifaciens
k127_7212391	7624	db_customA	S	AP013105.1	97.569	126	7555	0	12730	7624	AP013105.1 Adlercreutzia equolifaciens DSM 19450 DNA; complete genome	97.6522	1	Bacteria;Actinobacteria;Coriobacteriia;Eggerthellales;Eggerthellaceae;Adlercreutzia;Adlercreutzia_equolifaciens
k127_1153578	109369	nt	S	AP022829.1	99.13	7264	56536	0	88623	109369	AP022829.1 Adlercreutzia sp. 8CFCBH1 DNA; complete genome	45.0704	1	Bacteria;Actinobacteria;Coriobacteriia;Eggerthellales;Eggerthellaceae;Adlercreutzia;Adlercreutzia_hattorii
k127_11597	17221	nt	S	AP022829.1	96.149	1254	17221	0	26090	17221	AP022829.1 Adlercreutzia sp. 8CFCBH1 DNA; complete genome	92.8808	3	Bacteria;Actinobacteria;Coriobacteriia;Eggerthellales;Eggerthellaceae;Adlercreutzia;Adlercreutzia_hattorii
k127_1627865	57059	nt	S	AP022829.1	99.695	20279	44577	0	44448	57059	AP022829.1 Adlercreutzia sp. 8CFCBH1 DNA; complete genome	42.5875	1	Bacteria;Actinobacteria;Coriobacteriia;Eggerthellales;Eggerthellaceae;Adlercreutzia;Adlercreutzia_hattorii
k127_1708101	33595	nt	S	AP022829.1	99.857	1	33470	0	61542	33595	AP022829.1 Adlercreutzia sp. 8CFCBH1 DNA; complete genome	99.6309	1	Bacteria;Actinobacteria;Coriobacteriia;Eggerthellales;Eggerthellaceae;Adlercreutzia;Adlercreutzia_hattorii
k127_1868092	15811	nt	S	AP022829.1	98.3	5780	15598	0	17208	15811	AP022829.1 Adlercreutzia sp. 8CFCBH1 DNA; complete genome	62.1213	1	Bacteria;Actinobacteria;Coriobacteriia;Eggerthellales;Eggerthellaceae;Adlercreutzia;Adlercreutzia_hattorii
k127_216163	17594	nt	S	AP022829.1	97.507	1780	15841	0	24035	17594	AP022829.1 Adlercreutzia sp. 8CFCBH1 DNA; complete genome	80.0102	3	Bacteria;Actinobacteria;Coriobacteriia;Eggerthellales;Eggerthellaceae;Adlercreutzia;Adlercreutzia_hattorii
k127_2526210	5452	nt	S	AP022829.1	95.329	1863	5452	0	5701	5452	AP022829.1 Adlercreutzia sp. 8CFCBH1 DNA; complete genome	65.9758	1	Bacteria;Actinobacteria;Coriobacteriia;Eggerthellales;Eggerthellaceae;Adlercreutzia;Adlercreutzia_hattorii
k127_2539922	61533	nt	S	AP022829.1	99.468	9714	36948	0	49491	61533	AP022829.1 Adlercreutzia sp. 8CFCBH1 DNA; complete genome	44.2608	2	Bacteria;Actinobacteria;Coriobacteriia;Eggerthellales;Eggerthellaceae;Adlercreutzia;Adlercreutzia_hattorii
k127_259168	7516	nt	S	AP022829.1	99.96	1	7516	0	13862	7516	AP022829.1 Adlercreutzia sp. 8CFCBH1 DNA; complete genome	100	1	Bacteria;Actinobacteria;Coriobacteriia;Eggerthellales;Eggerthellaceae;Adlercreutzia;Adlercreutzia_hattorii
k127_260618	53431	nt	S	AP022829.1	97.755	17741	30968	0	22781	53431	AP022829.1 Adlercreutzia sp. 8CFCBH1 DNA; complete genome	24.7572	2	Bacteria;Actinobacteria;Coriobacteriia;Eggerthellales;Eggerthellaceae;Adlercreutzia;Adlercreutzia_hattorii
k127_2793904	167646	nt	S	AP022829.1	98.011	69520	105589	0	62643	167646	AP022829.1 Adlercreutzia sp. 8CFCBH1 DNA; complete genome	21.5341	3	Bacteria;Actinobacteria;Coriobacteriia;Eggerthellales;Eggerthellaceae;Adlercreutzia;Adlercreutzia_hattorii
k127_3130286	57966	nt	S	AP022829.1	98.112	30939	50106	0	33386	57966	AP022829.1 Adlercreutzia sp. 8CFCBH1 DNA; complete genome	33.0849	1	Bacteria;Actinobacteria;Coriobacteriia;Eggerthellales;Eggerthellaceae;Adlercreutzia;Adlercreutzia_hattorii
k127_3138340	5171	nt	S	AP022829.1	98.296	126	5171	0	8842	5171	AP022829.1 Adlercreutzia sp. 8CFCBH1 DNA; complete genome	97.5827	1	Bacteria;Actinobacteria;Coriobacteriia;Eggerthellales;Eggerthellaceae;Adlercreutzia;Adlercreutzia_hattorii
k127_3182749	3333	nt	S	AP022829.1	98.293	735	2023	0	2257	3333	AP022829.1 Adlercreutzia sp. 8CFCBH1 DNA; complete genome	38.6739	1	Bacteria;Actinobacteria;Coriobacteriia;Eggerthellales;Eggerthellaceae;Adlercreutzia;Adlercreutzia_hattorii
k127_3289300	81751	nt	S	AP022829.1	94.453	20491	34859	0	22125	81751	AP022829.1 Adlercreutzia sp. 8CFCBH1 DNA; complete genome	17.6414	4	Bacteria;Actinobacteria;Coriobacteriia;Eggerthellales;Eggerthellaceae;Adlercreutzia;Adlercreutzia_hattorii
k127_3395084	137688	nt	S	AP022829.1	99.037	4273	40208	0	64445	137688	AP022829.1 Adlercreutzia sp. 8CFCBH1 DNA; complete genome	26.1018	1	Bacteria;Actinobacteria;Coriobacteriia;Eggerthellales;Eggerthellaceae;Adlercreutzia;Adlercreutzia_hattorii
k127_3398047	10079	nt	S	AP022829.1	99.147	1	10079	0	18137	10079	AP022829.1 Adlercreutzia sp. 8CFCBH1 DNA; complete genome	100	1	Bacteria;Actinobacteria;Coriobacteriia;Eggerthellales;Eggerthellaceae;Adlercreutzia;Adlercreutzia_hattorii
k127_3399460	20233	nt	S	AP022829.1	98.212	9775	20231	0	18264	20233	AP022829.1 Adlercreutzia sp. 8CFCBH1 DNA; complete genome	51.6829	3	Bacteria;Actinobacteria;Coriobacteriia;Eggerthellales;Eggerthellaceae;Adlercreutzia;Adlercreutzia_hattorii
k127_4146383	47029	nt	S	AP022829.1	96.46	11757	30569	0	31034	47029	AP022829.1 Adlercreutzia sp. 8CFCBH1 DNA; complete genome	40.0689	2	Bacteria;Actinobacteria;Coriobacteriia;Eggerthellales;Eggerthellaceae;Adlercreutzia;Adlercreutzia_hattorii
k127_4340185	8281	nt	S	AP022829.1	99.907	2908	8281	0	9895	8281	AP022829.1 Adlercreutzia sp. 8CFCBH1 DNA; complete genome	64.8955	1	Bacteria;Actinobacteria;Coriobacteriia;Eggerthellales;Eggerthellaceae;Adlercreutzia;Adlercreutzia_hattorii
k127_4362677	5528	nt	S	AP022829.1	99.139	1	4067	0	7317	5528	AP022829.1 Adlercreutzia sp. 8CFCBH1 DNA; complete genome	73.5709	1	Bacteria;Actinobacteria;Coriobacteriia;Eggerthellales;Eggerthellaceae;Adlercreutzia;Adlercreutzia_hattorii
k127_4365589	90525	nt	S	AP022829.1	97.334	43440	76729	0	56556	90525	AP022829.1 Adlercreutzia sp. 8CFCBH1 DNA; complete genome	36.7909	4	Bacteria;Actinobacteria;Coriobacteriia;Eggerthellales;Eggerthellaceae;Adlercreutzia;Adlercreutzia_hattorii
k127_4484654	28353	nt	S	AP022829.1	98.022	2024	19393	0	30191	28353	AP022829.1 Adlercreutzia sp. 8CFCBH1 DNA; complete genome	61.3515	1	Bacteria;Actinobacteria;Coriobacteriia;Eggerthellales;Eggerthellaceae;Adlercreutzia;Adlercreutzia_hattorii
k127_4490761	44362	nt	S	AP022829.1	96.67	21240	33429	0	20255	44362	AP022829.1 Adlercreutzia sp. 8CFCBH1 DNA; complete genome	27.4852	3	Bacteria;Actinobacteria;Coriobacteriia;Eggerthellales;Eggerthellaceae;Adlercreutzia;Adlercreutzia_hattorii
k127_5067522	60168	nt	S	AP022829.1	97.848	2706	13297	0	18301	60168	AP022829.1 Adlercreutzia sp. 8CFCBH1 DNA; complete genome	17.6107	1	Bacteria;Actinobacteria;Coriobacteriia;Eggerthellales;Eggerthellaceae;Adlercreutzia;Adlercreutzia_hattorii
k127_5072963	5048	nt	S	AP022829.1	99.909	2456	4650	0	4043	5048	AP022829.1 Adlercreutzia sp. 8CFCBH1 DNA; complete genome	43.4826	1	Bacteria;Actinobacteria;Coriobacteriia;Eggerthellales;Eggerthellaceae;Adlercreutzia;Adlercreutzia_hattorii
k127_5460652	69923	nt	S	AP022829.1	99.049	139	19057	0	33940	69923	AP022829.1 Adlercreutzia sp. 8CFCBH1 DNA; complete genome	27.0583	2	Bacteria;Actinobacteria;Coriobacteriia;Eggerthellales;Eggerthellaceae;Adlercreutzia;Adlercreutzia_hattorii
k127_5653752	50945	nt	S	AP022829.1	97.881	1638	24278	0	39164	50945	AP022829.1 Adlercreutzia sp. 8CFCBH1 DNA; complete genome	44.4715	1	Bacteria;Actinobacteria;Coriobacteriia;Eggerthellales;Eggerthellaceae;Adlercreutzia;Adlercreutzia_hattorii
k127_5659581	38962	nt	S	AP022829.1	96.877	8210	25392	0	28753	38962	AP022829.1 Adlercreutzia sp. 8CFCBH1 DNA; complete genome	44.1327	3	Bacteria;Actinobacteria;Coriobacteriia;Eggerthellales;Eggerthellaceae;Adlercreutzia;Adlercreutzia_hattorii
k127_5729209	185141	nt	S	AP022829.1	96.147	44748	67208	0	36719	185141	AP022829.1 Adlercreutzia sp. 8CFCBH1 DNA; complete genome	12.1691	4	Bacteria;Actinobacteria;Coriobacteriia;Eggerthellales;Eggerthellaceae;Adlercreutzia;Adlercreutzia_hattorii
k127_5908731	63030	nt	S	AP022829.1	97.893	6390	36974	0	52902	63030	AP022829.1 Adlercreutzia sp. 8CFCBH1 DNA; complete genome	48.5562	1	Bacteria;Actinobacteria;Coriobacteriia;Eggerthellales;Eggerthellaceae;Adlercreutzia;Adlercreutzia_hattorii
k127_6120454	24850	nt	S	AP022829.1	94.833	10036	24385	0	22397	24850	AP022829.1 Adlercreutzia sp. 8CFCBH1 DNA; complete genome	57.8672	3	Bacteria;Actinobacteria;Coriobacteriia;Eggerthellales;Eggerthellaceae;Adlercreutzia;Adlercreutzia_hattorii
k127_6216712	2468	nt	S	AP022829.1	99.878	1	2468	0	4542	2468	AP022829.1 Adlercreutzia sp. 8CFCBH1 DNA; complete genome	100	1	Bacteria;Actinobacteria;Coriobacteriia;Eggerthellales;Eggerthellaceae;Adlercreutzia;Adlercreutzia_hattorii
k127_6223814	151957	nt	S	AP022829.1	99.288	21300	53751	0	58658	151957	AP022829.1 Adlercreutzia sp. 8CFCBH1 DNA; complete genome	21.3653	2	Bacteria;Actinobacteria;Coriobacteriia;Eggerthellales;Eggerthellaceae;Adlercreutzia;Adlercreutzia_hattorii
k127_6620090	16593	nt	S	AP022829.1	98.275	3535	16457	0	22613	16593	AP022829.1 Adlercreutzia sp. 8CFCBH1 DNA; complete genome	77.8943	2	Bacteria;Actinobacteria;Coriobacteriia;Eggerthellales;Eggerthellaceae;Adlercreutzia;Adlercreutzia_hattorii
k127_6709393	151956	nt	S	AP022829.1	98.981	78749	114252	0	63562	151956	AP022829.1 Adlercreutzia sp. 8CFCBH1 DNA; complete genome	23.3719	5	Bacteria;Actinobacteria;Coriobacteriia;Eggerthellales;Eggerthellaceae;Adlercreutzia;Adlercreutzia_hattorii
k127_6782248	12282	nt	S	AP022829.1	92.442	10903	12155	0	1790	12282	AP022829.1 Adlercreutzia sp. 8CFCBH1 DNA; complete genome	10.2345	2	Bacteria;Actinobacteria;Coriobacteriia;Eggerthellales;Eggerthellaceae;Adlercreutzia;Adlercreutzia_hattorii
k127_69914	1486	nt	S	AP022829.1	98.346	1	1450	0	2545	1486	AP022829.1 Adlercreutzia sp. 8CFCBH1 DNA; complete genome	97.6447	1	Bacteria;Actinobacteria;Coriobacteriia;Eggerthellales;Eggerthellaceae;Adlercreutzia;Adlercreutzia_hattorii
k127_1631399	23224	nt	G	AP012211.1	97.296	15610	23224	0	12920	23224	AP012211.1 Eggerthella sp. YY7918 DNA; complete genome	32.8023	1	Bacteria;Actinobacteria;Coriobacteriia;Eggerthellales;Eggerthellaceae;Eggerthella;Eggerthella
k127_3451017	16343	nt	G	AP012211.1	98.928	6141	16217	0	18011	16343	AP012211.1 Eggerthella sp. YY7918 DNA; complete genome	61.6594	1	Bacteria;Actinobacteria;Coriobacteriia;Eggerthellales;Eggerthellaceae;Eggerthella;Eggerthella
k127_4479850	10331	nt	G	AP012211.1	98.511	96	10165	0	17758	10331	AP012211.1 Eggerthella sp. YY7918 DNA; complete genome	97.5027	1	Bacteria;Actinobacteria;Coriobacteriia;Eggerthellales;Eggerthellaceae;Eggerthella;Eggerthella
k127_582028	72753	nt	S	CP089331.1	96.772	70927	72753	0	3048	72753	CP089331.1 Eggerthella lenta strain APC055-529-1D chromosome; complete genome	2.51261	3	Bacteria;Actinobacteria;Coriobacteriia;Eggerthellales;Eggerthellaceae;Eggerthella;Eggerthella_lenta
k127_1630286	643	nt	S	AP024470.1	100	1	126	1.63e-56	233	643	AP024470.1 Adlercreutzia equolifaciens subsp. celatus JCM 14811 DNA; complete genome	19.5956	1	Bacteria;Actinomycetota;Coriobacteriia;Eggerthellales;Eggerthellaceae;Adlercreutzia;Adlercreutzia_equolifaciens
k127_1197152	153962	nt	K	EU067507.1	91.011	152694	152960	6.52e-92	359	153962	EU067507.1 Uncultured bacterium clone HA0AAA16ZG03RM1 genomic sequence	0.173419	1	Bacteria;Bacteria;Bacteria;Bacteria;Bacteria;Bacteria;Bacteria
k127_127190	11860	nt	K	KX125501.1	95.706	11374	11860	0	784	11860	KX125501.1 Uncultured bacterium clone AmoxConc_TwinA_Time3_TE_7 genomic sequence	4.1231	1	Bacteria;Bacteria;Bacteria;Bacteria;Bacteria;Bacteria;Bacteria
k127_1405350	10485	nt	K	AB606316.1	100	1	104	4.75e-43	193	10485	AB606316.1 Uncultured bacterium gene for 16S rRNA; partial sequence; clone: LKMC084; obtained from feces of mouse	0.991893	1	Bacteria;Bacteria;Bacteria;Bacteria;Bacteria;Bacteria;Bacteria
k127_1668384	20637	nt	K	JN583151.1	97.218	2000	2682	0	1157	20637	JN583151.1 Uncultured bacterium clone 11WL_B76P2H7 putative beta-glucuronidase (BG) gene; partial cds	3.30959	1	Bacteria;Bacteria;Bacteria;Bacteria;Bacteria;Bacteria;Bacteria
k127_166862	10640	nt	K	EF098280.1	97.333	1	225	2.67e-100	383	10640	EF098280.1 Uncultured bacterium clone SWPT14_aaa04b05 16S ribosomal RNA gene; partial sequence	2.11466	1	Bacteria;Bacteria;Bacteria;Bacteria;Bacteria;Bacteria;Bacteria
k127_1827724	21705	nt	K	AY667779.2	99.065	1	321	2.33e-158	577	21705	AY667779.2 Uncultured bacterium clone abc55h08.x1 16S ribosomal RNA gene; partial sequence	1.47892	1	Bacteria;Bacteria;Bacteria;Bacteria;Bacteria;Bacteria;Bacteria
k127_1838473	14000	nt	K	EU474352.1	93.763	4	484	0	723	14000	EU474352.1 Uncultured bacterium clone GORSD_aaa02h12 16S ribosomal RNA gene; partial sequence	3.43571	1	Bacteria;Bacteria;Bacteria;Bacteria;Bacteria;Bacteria;Bacteria
k127_1855643	60625	nt	K	DQ380410.1	93.519	58110	58541	2.28e-177	641	60625	DQ380410.1 Uncultured bacterium clone rIB2 oxygen-independent coproporphyrinogen gene; partial cds	0.712577	1	Bacteria;Bacteria;Bacteria;Bacteria;Bacteria;Bacteria;Bacteria
k127_1855884	31892	nt	K	LN853910.1	90.691	16120	16450	1.69e-116	438	31892	LN853910.1 Uncultured prokaryote from Rat gut metagenome metamobilome; plasmid pRGFK1348	1.04415	1	Bacteria;Bacteria;Bacteria;Bacteria;Bacteria;Bacteria;Bacteria
k127_1930451	128981	nt	K	EF098280.1	100	128799	128981	7.12e-86	339	128981	EF098280.1 Uncultured bacterium clone SWPT14_aaa04b05 16S ribosomal RNA gene; partial sequence	0.141881	1	Bacteria;Bacteria;Bacteria;Bacteria;Bacteria;Bacteria;Bacteria
k127_2033583	244	nt	K	EU058083.1	97.203	35	177	9.32e-60	243	244	EU058083.1 Uncultured bacterium clone LM0ABA2ZD02FM1 genomic sequence	58.6066	1	Bacteria;Bacteria;Bacteria;Bacteria;Bacteria;Bacteria;Bacteria
k127_2297830	13442	nt	K	LN853437.1	96.489	981	1977	0	1648	13442	LN853437.1 Uncultured prokaryote from Rat gut metagenome metamobilome; isolate RGFK0831	7.41705	2	Bacteria;Bacteria;Bacteria;Bacteria;Bacteria;Bacteria;Bacteria
k127_2328565	15317	nt	K	LN853280.1	90.851	3732	5282	0	2076	15317	LN853280.1 Uncultured prokaryote from Rat gut metagenome metamobilome; isolate RGRH0656	10.1325	1	Bacteria;Bacteria;Bacteria;Bacteria;Bacteria;Bacteria;Bacteria
k127_2363821	5217	nt	K	FJ158000.1	97.345	3557	3782	1.3e-100	383	5217	FJ158000.1 Uncultured bacterium clone 1 putative transposase (tra); hypothetical protein; tetracycline resistance protein (tet(40)); and hypothetical protein genes; complete cds; and unknown gene	4.33199	1	Bacteria;Bacteria;Bacteria;Bacteria;Bacteria;Bacteria;Bacteria
k127_2524881	22481	nt	K	KX127597.1	93.22	22023	22139	1.33e-36	172	22481	KX127597.1 Uncultured bacterium clone Control_Mom_TE_37 genomic sequence	0.524888	1	Bacteria;Bacteria;Bacteria;Bacteria;Bacteria;Bacteria;Bacteria
k127_2524893	16726	nt	K	EU061185.1	99.686	2068	2703	0	1164	16726	EU061185.1 Uncultured bacterium clone LM0ABA41ZC11RM1 genomic sequence	3.80246	1	Bacteria;Bacteria;Bacteria;Bacteria;Bacteria;Bacteria;Bacteria
k127_276021	1011	nt	K	LN852781.1	93.097	1	1011	0	1480	1011	LN852781.1 Uncultured prokaryote from Rat gut metagenome metamobilome; isolate RGRH0090	100	1	Bacteria;Bacteria;Bacteria;Bacteria;Bacteria;Bacteria;Bacteria
k127_2771475	1533	nt	K	LN852992.1	92.063	1406	1530	2.47e-38	174	1533	LN852992.1 Uncultured prokaryote from Rat gut metagenome metamobilome; plasmid pRGRH0322	8.21918	1	Bacteria;Bacteria;Bacteria;Bacteria;Bacteria;Bacteria;Bacteria
k127_2828882	5986	nt	K	EU063215.1	93.865	82	732	0	970	5986	EU063215.1 Uncultured bacterium clone LM0ACA23ZH01FM1 genomic sequence	10.8921	1	Bacteria;Bacteria;Bacteria;Bacteria;Bacteria;Bacteria;Bacteria
k127_2829044	4571	nt	K	EU063215.1	95.164	82	720	0	1009	4571	EU063215.1 Uncultured bacterium clone LM0ACA23ZH01FM1 genomic sequence	14.0232	1	Bacteria;Bacteria;Bacteria;Bacteria;Bacteria;Bacteria;Bacteria
k127_3086104	15374	nt	K	AB626957.1	99.065	1	321	1.65e-158	577	15374	AB626957.1 Uncultured bacterium gene for 16S rRNA; partial sequence; clone: LKMC237; obtained from feces of mouse	2.08794	1	Bacteria;Bacteria;Bacteria;Bacteria;Bacteria;Bacteria;Bacteria
k127_3225087	144613	nt	K	KX125860.1	90.449	31974	32840	0	1136	144613	KX125860.1 Uncultured bacterium clone AmoxDisc_Mom_GE_10 genomic sequence	0.600914	1	Bacteria;Bacteria;Bacteria;Bacteria;Bacteria;Bacteria;Bacteria
k127_3257670	2676	nt	K	EU505629.1	99.759	2262	2676	0	761	2676	EU505629.1 Uncultured bacterium clone myd5_aaa03g02 16S ribosomal RNA gene; partial sequence	15.5082	1	Bacteria;Bacteria;Bacteria;Bacteria;Bacteria;Bacteria;Bacteria
k127_3388556	21139	nt	K	DQ380410.1	92.03	498	1161	0	950	21139	DQ380410.1 Uncultured bacterium clone rIB2 oxygen-independent coproporphyrinogen gene; partial cds	3.14584	1	Bacteria;Bacteria;Bacteria;Bacteria;Bacteria;Bacteria;Bacteria
k127_3447450	4553	nt	K	DQ380410.1	96.058	498	978	0	784	4553	DQ380410.1 Uncultured bacterium clone rIB2 oxygen-independent coproporphyrinogen gene; partial cds	10.5864	1	Bacteria;Bacteria;Bacteria;Bacteria;Bacteria;Bacteria;Bacteria
k127_3544648	42701	nt	K	KU545051.1	90.083	6	125	9.16e-31	154	42701	KU545051.1 Uncultured bacterium clone TE_01B_000_Contig_1 genomic sequence	0.283366	1	Bacteria;Bacteria;Bacteria;Bacteria;Bacteria;Bacteria;Bacteria
k127_3563630	8463	nt	K	EU059131.1	99.109	1842	2627	0	1413	8463	EU059131.1 Uncultured bacterium clone LM0ABA41ZC11FM1 genomic sequence	9.28749	1	Bacteria;Bacteria;Bacteria;Bacteria;Bacteria;Bacteria;Bacteria
k127_3647835	293147	nt	K	LN853480.1	95.032	189786	190872	0	1709	293147	LN853480.1 Uncultured prokaryote from Rat gut metagenome metamobilome; isolate RGFK0877	0.370804	1	Bacteria;Bacteria;Bacteria;Bacteria;Bacteria;Bacteria;Bacteria
k127_3657246	2145	nt	K	EU061899.1	100	8	647	0	1182	2145	EU061899.1 Uncultured bacterium clone HA0AAA5ZB04RM1 genomic sequence	29.8368	1	Bacteria;Bacteria;Bacteria;Bacteria;Bacteria;Bacteria;Bacteria
k127_3872307	143330	nt	K	FJ157999.1	92.917	143091	143330	1.7e-87	344	143330	FJ157999.1 Uncultured bacterium clone 7 tetracycline resistance protein (tet(W)) gene; partial cds; hypothetical protein and tetracycline resistance protein (tet(40)) genes; complete cds; and unknown gene	0.167446	2	Bacteria;Bacteria;Bacteria;Bacteria;Bacteria;Bacteria;Bacteria
k127_3892684	53541	nt	K	LN853817.1	92.888	50731	53245	0	3627	53541	LN853817.1 Uncultured prokaryote from Rat gut metagenome metamobilome; plasmid pRGFK1245	4.70107	1	Bacteria;Bacteria;Bacteria;Bacteria;Bacteria;Bacteria;Bacteria
k127_3933263	7489	nt	K	EU461990.1	98.99	1	99	9.49e-39	178	7489	EU461990.1 Uncultured bacterium clone SPIM_aaj33a02 16S ribosomal RNA gene; partial sequence	1.32194	1	Bacteria;Bacteria;Bacteria;Bacteria;Bacteria;Bacteria;Bacteria
k127_3981060	5438	nt	K	EU062468.1	95.185	440	1062	0	985	5438	EU062468.1 Uncultured bacterium clone LM0ACA14ZA07FM1 genomic sequence	11.4564	1	Bacteria;Bacteria;Bacteria;Bacteria;Bacteria;Bacteria;Bacteria
k127_4136416	13666	nt	K	DQ380410.1	93.945	11944	12520	0	874	13666	DQ380410.1 Uncultured bacterium clone rIB2 oxygen-independent coproporphyrinogen gene; partial cds	4.22947	1	Bacteria;Bacteria;Bacteria;Bacteria;Bacteria;Bacteria;Bacteria
k127_4315121	22457	nt	K	AB969484.1	100	1	149	9.85e-68	276	22457	AB969484.1 Uncultured bacterium gene for 16S rRNA; partial sequence; clone: DH8	0.66349	1	Bacteria;Bacteria;Bacteria;Bacteria;Bacteria;Bacteria;Bacteria
k127_4333268	16828	nt	K	EU058114.1	99.631	5130	5941	0	1483	16828	EU058114.1 Uncultured bacterium clone LM0ABA2ZG08FM1 genomic sequence	4.82529	1	Bacteria;Bacteria;Bacteria;Bacteria;Bacteria;Bacteria;Bacteria
k127_4366366	49268	nt	K	KX128143.1	93.798	49140	49268	6.23e-43	195	49268	KX128143.1 Uncultured bacterium clone Control_TwinA_Time2_TE_12 genomic sequence	0.261833	1	Bacteria;Bacteria;Bacteria;Bacteria;Bacteria;Bacteria;Bacteria
k127_4397316	101038	nt	K	FJ157999.1	93.75	100813	101036	2.59e-84	333	101038	FJ157999.1 Uncultured bacterium clone 7 tetracycline resistance protein (tet(W)) gene; partial cds; hypothetical protein and tetracycline resistance protein (tet(40)) genes; complete cds; and unknown gene	0.221699	1	Bacteria;Bacteria;Bacteria;Bacteria;Bacteria;Bacteria;Bacteria
k127_4414683	59075	nt	K	EU504334.1	100	58885	59075	1.16e-90	353	59075	EU504334.1 Uncultured bacterium clone CRWD6_aaa02f02 16S ribosomal RNA gene; partial sequence	0.323318	1	Bacteria;Bacteria;Bacteria;Bacteria;Bacteria;Bacteria;Bacteria
k127_486944	4252	nt	K	KU547705.1	96.311	400	2703	0	3783	4252	KU547705.1 Uncultured bacterium clone TE_08X_000_Contig_11 genomic sequence	54.1863	1	Bacteria;Bacteria;Bacteria;Bacteria;Bacteria;Bacteria;Bacteria
k127_4886657	54473	nt	K	EF098797.1	100	54242	54473	1.73e-113	429	54473	EF098797.1 Uncultured bacterium clone SWPT1_aaa01a12 16S ribosomal RNA gene; partial sequence	0.425899	1	Bacteria;Bacteria;Bacteria;Bacteria;Bacteria;Bacteria;Bacteria
k127_5026213	39213	nt	K	EU503879.1	100	39062	39213	3.7e-69	281	39213	EU503879.1 Uncultured bacterium clone CRWD4_aaa02a01 16S ribosomal RNA gene; partial sequence	0.387627	1	Bacteria;Bacteria;Bacteria;Bacteria;Bacteria;Bacteria;Bacteria
k127_5056936	277735	nt	K	KX128033.1	99.339	45187	49268	0	7389	277735	KX128033.1 Uncultured bacterium clone Control_TwinA_Time2_CY_19 genomic sequence	1.47011	1	Bacteria;Bacteria;Bacteria;Bacteria;Bacteria;Bacteria;Bacteria
k127_5399637	5219	nt	K	FJ158002.1	99.801	204	5219	0	9210	5219	FJ158002.1 Uncultured bacterium clone 3 tetracycline resistance protein (tet(W)) gene; partial cds; hypothetical protein; tetracycline resistance protein (tet(40)); hypothetical proteins; putative mobilization protein (mob); and putative replication protein (rep) genes; complete cds; and tetracycline resistance protein (tet(W)) gene; partial cds	96.2253	1	Bacteria;Bacteria;Bacteria;Bacteria;Bacteria;Bacteria;Bacteria
k127_5442762	3429	nt	K	KX127586.1	92.039	1	2549	0	3581	3429	KX127586.1 Uncultured bacterium clone Control_Mom_TE_19 genomic sequence	74.3657	1	Bacteria;Bacteria;Bacteria;Bacteria;Bacteria;Bacteria;Bacteria
k127_5826025	5235	nt	K	LN852821.1	95.706	985	1147	6.39e-64	261	5235	LN852821.1 Uncultured prokaryote from Rat gut metagenome metamobilome; plasmid pRGRH0131	3.11366	1	Bacteria;Bacteria;Bacteria;Bacteria;Bacteria;Bacteria;Bacteria
k127_5949719	33829	nt	K	LN853437.1	92.585	32690	33686	0	1432	33829	LN853437.1 Uncultured prokaryote from Rat gut metagenome metamobilome; isolate RGFK0831	2.95013	1	Bacteria;Bacteria;Bacteria;Bacteria;Bacteria;Bacteria;Bacteria
k127_5957961	518	nt	K	KU545411.1	100	1	518	0	957	518	KU545411.1 Uncultured bacterium clone TE_01G_005_Contig_3 genomic sequence	100	1	Bacteria;Bacteria;Bacteria;Bacteria;Bacteria;Bacteria;Bacteria
k127_5965814	20138	nt	K	KX127933.1	91.176	19937	20138	3.18e-67	274	20138	KX127933.1 Uncultured bacterium clone Control_TwinA_Time1_TE_48 genomic sequence	1.01301	2	Bacteria;Bacteria;Bacteria;Bacteria;Bacteria;Bacteria;Bacteria
k127_6090157	6206	nt	K	DQ380410.1	93.401	4147	4736	0	880	6206	DQ380410.1 Uncultured bacterium clone rIB2 oxygen-independent coproporphyrinogen gene; partial cds	9.52304	1	Bacteria;Bacteria;Bacteria;Bacteria;Bacteria;Bacteria;Bacteria
k127_6632127	20681	nt	K	LN854169.1	90.583	8793	9459	0	885	20681	LN854169.1 Uncultured prokaryote from Rat gut metagenome metamobilome; plasmid pRGFK1664	3.23485	2	Bacteria;Bacteria;Bacteria;Bacteria;Bacteria;Bacteria;Bacteria
k127_6730880	626	nt	K	MW341130.1	97.28	1	625	0	1061	626	MW341130.1 Bacterium strain N011 genomic sequence	99.8403	1	Bacteria;Bacteria;Bacteria;Bacteria;Bacteria;Bacteria;Bacteria
k127_687947	19887	nt	K	EU506927.1	100	1	321	2.12e-163	593	19887	EU506927.1 Uncultured bacterium clone MD21_aar08e02 16S ribosomal RNA gene; partial sequence	1.61412	1	Bacteria;Bacteria;Bacteria;Bacteria;Bacteria;Bacteria;Bacteria
k127_68868	396	nt	K	KT336258.1	100	1	396	0	732	396	KT336258.1 Uncultured bacterium 31i10b genomic sequence	100	1	Bacteria;Bacteria;Bacteria;Bacteria;Bacteria;Bacteria;Bacteria
k127_689312	5740	nt	K	KX127407.1	98.02	5537	5738	4.05e-91	351	5740	KX127407.1 Uncultured bacterium clone AmoxDisc_TwinB_Time3_PI_190 genomic sequence	3.51916	1	Bacteria;Bacteria;Bacteria;Bacteria;Bacteria;Bacteria;Bacteria
k127_6979114	71270	nt	K	LN854184.1	90.85	36858	37009	1.5e-45	204	71270	LN854184.1 Uncultured prokaryote from Rat gut metagenome metamobilome; isolate RGFK1681	0.214677	1	Bacteria;Bacteria;Bacteria;Bacteria;Bacteria;Bacteria;Bacteria
k127_7155544	14486	nt	K	LN853437.1	96.528	13911	14486	0	953	14486	LN853437.1 Uncultured prokaryote from Rat gut metagenome metamobilome; isolate RGFK0831	3.97625	1	Bacteria;Bacteria;Bacteria;Bacteria;Bacteria;Bacteria;Bacteria
k127_715651	1215	nt	K	KU545934.1	100	1	130	1.89e-58	241	1215	KU545934.1 Uncultured bacterium clone TE_03B_000_Contig_3 genomic sequence	10.6996	1	Bacteria;Bacteria;Bacteria;Bacteria;Bacteria;Bacteria;Bacteria
k127_727208	1992	nt	K	EU061896.1	98.907	1654	1836	2.34e-84	327	1992	EU061896.1 Uncultured bacterium clone HA0AAA5ZA10RM1 genomic sequence	9.18675	1	Bacteria;Bacteria;Bacteria;Bacteria;Bacteria;Bacteria;Bacteria
k127_7303445	5753	nt	K	LN853054.1	94.33	4422	4614	1.93e-74	296	5753	LN853054.1 Uncultured prokaryote from Rat gut metagenome metamobilome; plasmid pRGRH0408	3.37215	1	Bacteria;Bacteria;Bacteria;Bacteria;Bacteria;Bacteria;Bacteria
k127_842298	17852	nt	K	AB120787.1	100	17752	17852	3.77e-41	187	17852	AB120787.1 Uncultured Gram-positive bacterium gene for 16S rRNA; partial sequence; clone:MC41D04	0.565763	1	Bacteria;Bacteria;Bacteria;Bacteria;Bacteria;Bacteria;Bacteria
k127_941847	1082	nt	K	EU062332.1	91.119	212	774	0	763	1082	EU062332.1 Uncultured bacterium clone LM0ACA11ZE01FM1 genomic sequence	52.0333	1	Bacteria;Bacteria;Bacteria;Bacteria;Bacteria;Bacteria;Bacteria
k127_94297	1376	nt	K	KU548356.1	99.855	1	1376	0	2531	1376	KU548356.1 Uncultured bacterium clone TE_0401_3a_Contig_12 genomic sequence	100	1	Bacteria;Bacteria;Bacteria;Bacteria;Bacteria;Bacteria;Bacteria
k127_307891	125408	nt	S	KJ816753.1	93.625	1	2447	0	3655	125408	KJ816753.1 Bacteroides fragilis strain HMW 615 transposon CTnHyb; complete sequence	1.95123	1	Bacteria;Bacteroidetes;Bacteroidia;Bacteroidales;Bacteroidaceae;Bacteroides;Bacteroides_fragilis
k127_4692329	3776	nt	S	KJ816753.1	93.036	2417	3650	0	1803	3776	KJ816753.1 Bacteroides fragilis strain HMW 615 transposon CTnHyb; complete sequence	32.7066	2	Bacteria;Bacteroidetes;Bacteroidia;Bacteroidales;Bacteroidaceae;Bacteroides;Bacteroides_fragilis
k127_1378901	16280	nt	S	CP064353.1	99.799	324	16280	0	29290	16280	CP064353.1 Parabacteroides goldsteinii strain MTS01 chromosome; complete genome	98.0344	1	Bacteria;Bacteroidetes;Bacteroidia;Bacteroidales;Tannerellaceae;Parabacteroides;Parabacteroides_goldsteinii
k127_1410158	993	nt	S	CP064353.1	94.857	467	991	0	821	993	CP064353.1 Parabacteroides goldsteinii strain MTS01 chromosome; complete genome	52.8701	1	Bacteria;Bacteroidetes;Bacteroidia;Bacteroidales;Tannerellaceae;Parabacteroides;Parabacteroides_goldsteinii
k127_1640664	824	nt	S	CP064353.1	97.694	1	824	0	1417	824	CP064353.1 Parabacteroides goldsteinii strain MTS01 chromosome; complete genome	100	1	Bacteria;Bacteroidetes;Bacteroidia;Bacteroidales;Tannerellaceae;Parabacteroides;Parabacteroides_goldsteinii
k127_1657329	914	nt	S	CP064353.1	95.628	1	914	0	1467	914	CP064353.1 Parabacteroides goldsteinii strain MTS01 chromosome; complete genome	100	1	Bacteria;Bacteroidetes;Bacteroidia;Bacteroidales;Tannerellaceae;Parabacteroides;Parabacteroides_goldsteinii
k127_1900136	774	nt	S	CP081906.1	95.658	38	774	0	1184	774	CP081906.1 Parabacteroides goldsteinii strain BFG-241 chromosome; complete genome	95.2196	1	Bacteria;Bacteroidetes;Bacteroidia;Bacteroidales;Tannerellaceae;Parabacteroides;Parabacteroides_goldsteinii
k127_199281	1130	nt	S	CP064353.1	96.918	255	1130	0	1469	1130	CP064353.1 Parabacteroides goldsteinii strain MTS01 chromosome; complete genome	77.5221	1	Bacteria;Bacteroidetes;Bacteroidia;Bacteroidales;Tannerellaceae;Parabacteroides;Parabacteroides_goldsteinii
k127_2099302	3229	nt	S	CP064353.1	96.855	1	3178	0	5315	3229	CP064353.1 Parabacteroides goldsteinii strain MTS01 chromosome; complete genome	98.4825	1	Bacteria;Bacteroidetes;Bacteroidia;Bacteroidales;Tannerellaceae;Parabacteroides;Parabacteroides_goldsteinii
k127_2298221	648	nt	S	CP064353.1	96.296	1	648	0	1064	648	CP064353.1 Parabacteroides goldsteinii strain MTS01 chromosome; complete genome	100	1	Bacteria;Bacteroidetes;Bacteroidia;Bacteroidales;Tannerellaceae;Parabacteroides;Parabacteroides_goldsteinii
k127_2512308	732	nt	S	CP064353.1	97.534	1	730	0	1249	732	CP064353.1 Parabacteroides goldsteinii strain MTS01 chromosome; complete genome	99.7268	1	Bacteria;Bacteroidetes;Bacteroidia;Bacteroidales;Tannerellaceae;Parabacteroides;Parabacteroides_goldsteinii
k127_2603549	750	nt	S	CP064353.1	95.333	1	750	0	1192	750	CP064353.1 Parabacteroides goldsteinii strain MTS01 chromosome; complete genome	100	1	Bacteria;Bacteroidetes;Bacteroidia;Bacteroidales;Tannerellaceae;Parabacteroides;Parabacteroides_goldsteinii
k127_2734932	815	nt	S	CP064353.1	94.479	1	815	0	1256	815	CP064353.1 Parabacteroides goldsteinii strain MTS01 chromosome; complete genome	100	1	Bacteria;Bacteroidetes;Bacteroidia;Bacteroidales;Tannerellaceae;Parabacteroides;Parabacteroides_goldsteinii
k127_275428	1414	nt	S	CP064353.1	92.329	1	1414	0	2008	1414	CP064353.1 Parabacteroides goldsteinii strain MTS01 chromosome; complete genome	100	1	Bacteria;Bacteroidetes;Bacteroidia;Bacteroidales;Tannerellaceae;Parabacteroides;Parabacteroides_goldsteinii
k127_2787350	1428	nt	S	CP064353.1	96.202	53	1421	0	2241	1428	CP064353.1 Parabacteroides goldsteinii strain MTS01 chromosome; complete genome	95.8683	1	Bacteria;Bacteroidetes;Bacteroidia;Bacteroidales;Tannerellaceae;Parabacteroides;Parabacteroides_goldsteinii
k127_2996245	887	nt	S	CP064353.1	96.167	1	887	0	1448	887	CP064353.1 Parabacteroides goldsteinii strain MTS01 chromosome; complete genome	100	1	Bacteria;Bacteroidetes;Bacteroidia;Bacteroidales;Tannerellaceae;Parabacteroides;Parabacteroides_goldsteinii
k127_3498146	556	nt	S	CP064353.1	93.199	12	553	0	797	556	CP064353.1 Parabacteroides goldsteinii strain MTS01 chromosome; complete genome	97.8417	1	Bacteria;Bacteroidetes;Bacteroidia;Bacteroidales;Tannerellaceae;Parabacteroides;Parabacteroides_goldsteinii
k127_3660747	1895	nt	S	CP064353.1	95.462	1	1895	0	3024	1895	CP064353.1 Parabacteroides goldsteinii strain MTS01 chromosome; complete genome	100	1	Bacteria;Bacteroidetes;Bacteroidia;Bacteroidales;Tannerellaceae;Parabacteroides;Parabacteroides_goldsteinii
k127_3702243	535	nt	S	CP064353.1	94.766	1	535	0	833	535	CP064353.1 Parabacteroides goldsteinii strain MTS01 chromosome; complete genome	100	1	Bacteria;Bacteroidetes;Bacteroidia;Bacteroidales;Tannerellaceae;Parabacteroides;Parabacteroides_goldsteinii
k127_3947021	1009	nt	S	CP064353.1	96.716	1	1005	0	1674	1009	CP064353.1 Parabacteroides goldsteinii strain MTS01 chromosome; complete genome	99.6036	1	Bacteria;Bacteroidetes;Bacteroidia;Bacteroidales;Tannerellaceae;Parabacteroides;Parabacteroides_goldsteinii
k127_4307940	2656	nt	S	CP064353.1	94.115	14	2656	0	4019	2656	CP064353.1 Parabacteroides goldsteinii strain MTS01 chromosome; complete genome	99.8117	1	Bacteria;Bacteroidetes;Bacteroidia;Bacteroidales;Tannerellaceae;Parabacteroides;Parabacteroides_goldsteinii
k127_4313218	618	nt	S	CP064353.1	96.998	1	433	0	728	618	CP064353.1 Parabacteroides goldsteinii strain MTS01 chromosome; complete genome	70.0647	1	Bacteria;Bacteroidetes;Bacteroidia;Bacteroidales;Tannerellaceae;Parabacteroides;Parabacteroides_goldsteinii
k127_4347902	480	nt	S	CP064353.1	96.458	1	480	0	793	480	CP064353.1 Parabacteroides goldsteinii strain MTS01 chromosome; complete genome	100	1	Bacteria;Bacteroidetes;Bacteroidia;Bacteroidales;Tannerellaceae;Parabacteroides;Parabacteroides_goldsteinii
k127_4446393	1399	nt	S	CP064353.1	96.117	267	1399	0	1849	1399	CP064353.1 Parabacteroides goldsteinii strain MTS01 chromosome; complete genome	80.9864	1	Bacteria;Bacteroidetes;Bacteroidia;Bacteroidales;Tannerellaceae;Parabacteroides;Parabacteroides_goldsteinii
k127_495666	925	nt	S	CP064353.1	95.892	1	925	0	1498	925	CP064353.1 Parabacteroides goldsteinii strain MTS01 chromosome; complete genome	100	1	Bacteria;Bacteroidetes;Bacteroidia;Bacteroidales;Tannerellaceae;Parabacteroides;Parabacteroides_goldsteinii
k127_4986505	1589	nt	S	CP064353.1	95.63	4	1557	0	2492	1589	CP064353.1 Parabacteroides goldsteinii strain MTS01 chromosome; complete genome	97.9232	1	Bacteria;Bacteroidetes;Bacteroidia;Bacteroidales;Tannerellaceae;Parabacteroides;Parabacteroides_goldsteinii
k127_5031743	1234	nt	S	CP064353.1	94.098	1	1168	0	1773	1234	CP064353.1 Parabacteroides goldsteinii strain MTS01 chromosome; complete genome	94.7326	1	Bacteria;Bacteroidetes;Bacteroidia;Bacteroidales;Tannerellaceae;Parabacteroides;Parabacteroides_goldsteinii
k127_6001675	1462	nt	S	CP081906.1	90.61	642	1461	0	1088	1462	CP081906.1 Parabacteroides goldsteinii strain BFG-241 chromosome; complete genome	56.0876	2	Bacteria;Bacteroidetes;Bacteroidia;Bacteroidales;Tannerellaceae;Parabacteroides;Parabacteroides_goldsteinii
k127_6177912	701	nt	S	CP064353.1	95.215	75	701	0	992	701	CP064353.1 Parabacteroides goldsteinii strain MTS01 chromosome; complete genome	89.4437	1	Bacteria;Bacteroidetes;Bacteroidia;Bacteroidales;Tannerellaceae;Parabacteroides;Parabacteroides_goldsteinii
k127_6228048	546	nt	S	CP064353.1	94.371	14	546	0	819	546	CP064353.1 Parabacteroides goldsteinii strain MTS01 chromosome; complete genome	97.619	1	Bacteria;Bacteroidetes;Bacteroidia;Bacteroidales;Tannerellaceae;Parabacteroides;Parabacteroides_goldsteinii
k127_6977959	1059	nt	S	CP064353.1	96.503	2	1059	0	1749	1059	CP064353.1 Parabacteroides goldsteinii strain MTS01 chromosome; complete genome	99.9056	1	Bacteria;Bacteroidetes;Bacteroidia;Bacteroidales;Tannerellaceae;Parabacteroides;Parabacteroides_goldsteinii
k127_7043602	630	nt	S	CP064353.1	96.508	1	630	0	1042	630	CP064353.1 Parabacteroides goldsteinii strain MTS01 chromosome; complete genome	100	1	Bacteria;Bacteroidetes;Bacteroidia;Bacteroidales;Tannerellaceae;Parabacteroides;Parabacteroides_goldsteinii
k127_7111045	646	nt	S	CP064353.1	94.316	1	561	0	859	646	CP064353.1 Parabacteroides goldsteinii strain MTS01 chromosome; complete genome	87.1517	1	Bacteria;Bacteroidetes;Bacteroidia;Bacteroidales;Tannerellaceae;Parabacteroides;Parabacteroides_goldsteinii
k127_748700	1797	nt	S	CP064353.1	95.877	3	1797	0	2905	1797	CP064353.1 Parabacteroides goldsteinii strain MTS01 chromosome; complete genome	99.8887	1	Bacteria;Bacteroidetes;Bacteroidia;Bacteroidales;Tannerellaceae;Parabacteroides;Parabacteroides_goldsteinii
k127_1047876	461	db_customA	S	CP064353.1	98.265	1	461	0	808	461	CP064353.1 Parabacteroides goldsteinii strain MTS01 chromosome; complete genome	100	1	Bacteria;Bacteroidota;Bacteroidia;Bacteroidales;Tannerellaceae;Parabacteroides;Parabacteroides_goldsteinii
k127_1095	14679	db_customA	S	CP064353.1	99.687	1	14679	0	26849	14679	CP064353.1 Parabacteroides goldsteinii strain MTS01 chromosome; complete genome	100	1	Bacteria;Bacteroidota;Bacteroidia;Bacteroidales;Tannerellaceae;Parabacteroides;Parabacteroides_goldsteinii
k127_1156825	56697	db_customA	S	CP064353.1	99.963	1	56697	0	104600	56697	CP064353.1 Parabacteroides goldsteinii strain MTS01 chromosome; complete genome	100	1	Bacteria;Bacteroidota;Bacteroidia;Bacteroidales;Tannerellaceae;Parabacteroides;Parabacteroides_goldsteinii
k127_116351	6867	db_customA	S	CP064353.1	99.352	231	6867	0	12019	6867	CP064353.1 Parabacteroides goldsteinii strain MTS01 chromosome; complete genome	96.6506	1	Bacteria;Bacteroidota;Bacteroidia;Bacteroidales;Tannerellaceae;Parabacteroides;Parabacteroides_goldsteinii
k127_1182497	7129	db_customA	S	CP064353.1	99.103	19	7129	0	12798	7129	CP064353.1 Parabacteroides goldsteinii strain MTS01 chromosome; complete genome	100	1	Bacteria;Bacteroidota;Bacteroidia;Bacteroidales;Tannerellaceae;Parabacteroides;Parabacteroides_goldsteinii
k127_1197601	4776	db_customA	S	CP064353.1	98.163	95	4776	0	8170	4776	CP064353.1 Parabacteroides goldsteinii strain MTS01 chromosome; complete genome	98.0318	1	Bacteria;Bacteroidota;Bacteroidia;Bacteroidales;Tannerellaceae;Parabacteroides;Parabacteroides_goldsteinii
k127_1199678	44719	db_customA	S	CP064353.1	99.951	1	44719	0	82457	44719	CP064353.1 Parabacteroides goldsteinii strain MTS01 chromosome; complete genome	100	1	Bacteria;Bacteroidota;Bacteroidia;Bacteroidales;Tannerellaceae;Parabacteroides;Parabacteroides_goldsteinii
k127_1206546	729	db_customA	S	CP064353.1	99.177	1	729	0	1314	729	CP064353.1 Parabacteroides goldsteinii strain MTS01 chromosome; complete genome	100	1	Bacteria;Bacteroidota;Bacteroidia;Bacteroidales;Tannerellaceae;Parabacteroides;Parabacteroides_goldsteinii
k127_1250945	4183	db_customA	S	CP064353.1	99.88	1	4183	0	7697	4183	CP064353.1 Parabacteroides goldsteinii strain MTS01 chromosome; complete genome	100	1	Bacteria;Bacteroidota;Bacteroidia;Bacteroidales;Tannerellaceae;Parabacteroides;Parabacteroides_goldsteinii
k127_1279626	60221	db_customA	S	CP064353.1	99.959	23944	60221	0	66910	60221	CP064353.1 Parabacteroides goldsteinii strain MTS01 chromosome; complete genome	60.2448	2	Bacteria;Bacteroidota;Bacteroidia;Bacteroidales;Tannerellaceae;Parabacteroides;Parabacteroides_goldsteinii
k127_1298444	44020	db_customA	S	CP064353.1	99.852	1	44020	0	80930	44020	CP064353.1 Parabacteroides goldsteinii strain MTS01 chromosome; complete genome	100	1	Bacteria;Bacteroidota;Bacteroidia;Bacteroidales;Tannerellaceae;Parabacteroides;Parabacteroides_goldsteinii
k127_1367375	1450	db_customA	S	CP064353.1	98.828	1	1450	0	2584	1450	CP064353.1 Parabacteroides goldsteinii strain MTS01 chromosome; complete genome	100	1	Bacteria;Bacteroidota;Bacteroidia;Bacteroidales;Tannerellaceae;Parabacteroides;Parabacteroides_goldsteinii
k127_1380111	14462	db_customA	S	CP064353.1	99.827	1	14462	0	26567	14462	CP064353.1 Parabacteroides goldsteinii strain MTS01 chromosome; complete genome	100	1	Bacteria;Bacteroidota;Bacteroidia;Bacteroidales;Tannerellaceae;Parabacteroides;Parabacteroides_goldsteinii
k127_138342	66352	db_customA	S	CP064353.1	99.962	1	66207	0	122100	66352	CP064353.1 Parabacteroides goldsteinii strain MTS01 chromosome; complete genome	99.7815	1	Bacteria;Bacteroidota;Bacteroidia;Bacteroidales;Tannerellaceae;Parabacteroides;Parabacteroides_goldsteinii
k127_1388565	55390	db_customA	S	CP064353.1	99.962	587	55390	0	101100	55390	CP064353.1 Parabacteroides goldsteinii strain MTS01 chromosome; complete genome	98.9457	1	Bacteria;Bacteroidota;Bacteroidia;Bacteroidales;Tannerellaceae;Parabacteroides;Parabacteroides_goldsteinii
k127_140887	26044	db_customA	S	CP064353.1	99.804	1	26044	0	47810	26044	CP064353.1 Parabacteroides goldsteinii strain MTS01 chromosome; complete genome	100	1	Bacteria;Bacteroidota;Bacteroidia;Bacteroidales;Tannerellaceae;Parabacteroides;Parabacteroides_goldsteinii
k127_143381	4513	db_customA	S	CP064353.1	99.668	1	4513	0	8251	4513	CP064353.1 Parabacteroides goldsteinii strain MTS01 chromosome; complete genome	100	1	Bacteria;Bacteroidota;Bacteroidia;Bacteroidales;Tannerellaceae;Parabacteroides;Parabacteroides_goldsteinii
k127_1461931	53274	db_customA	S	CP064353.1	99.911	4769	53153	0	89107	53274	CP064353.1 Parabacteroides goldsteinii strain MTS01 chromosome; complete genome	90.8285	1	Bacteria;Bacteroidota;Bacteroidia;Bacteroidales;Tannerellaceae;Parabacteroides;Parabacteroides_goldsteinii
k127_1670333	14033	db_customA	S	CP064353.1	99.836	1	14027	0	25776	14033	CP064353.1 Parabacteroides goldsteinii strain MTS01 chromosome; complete genome	99.9572	1	Bacteria;Bacteroidota;Bacteroidia;Bacteroidales;Tannerellaceae;Parabacteroides;Parabacteroides_goldsteinii
k127_1709769	7950	db_customA	S	CP064353.1	99.484	1	7950	0	14454	7950	CP064353.1 Parabacteroides goldsteinii strain MTS01 chromosome; complete genome	100	1	Bacteria;Bacteroidota;Bacteroidia;Bacteroidales;Tannerellaceae;Parabacteroides;Parabacteroides_goldsteinii
k127_1710773	1337	db_customA	S	CP064353.1	97.596	7	1337	0	2281	1337	CP064353.1 Parabacteroides goldsteinii strain MTS01 chromosome; complete genome	99.5512	1	Bacteria;Bacteroidota;Bacteroidia;Bacteroidales;Tannerellaceae;Parabacteroides;Parabacteroides_goldsteinii
k127_1716458	47696	db_customA	S	CP064353.1	99.815	15	47626	0	87436	47696	CP064353.1 Parabacteroides goldsteinii strain MTS01 chromosome; complete genome	99.826	1	Bacteria;Bacteroidota;Bacteroidia;Bacteroidales;Tannerellaceae;Parabacteroides;Parabacteroides_goldsteinii
k127_18270	78759	db_customA	S	CP064353.1	99.983	1	78759	0	145400	78759	CP064353.1 Parabacteroides goldsteinii strain MTS01 chromosome; complete genome	100	1	Bacteria;Bacteroidota;Bacteroidia;Bacteroidales;Tannerellaceae;Parabacteroides;Parabacteroides_goldsteinii
k127_1850975	36751	db_customA	S	CP064353.1	99.946	1	36751	0	67756	36751	CP064353.1 Parabacteroides goldsteinii strain MTS01 chromosome; complete genome	100	1	Bacteria;Bacteroidota;Bacteroidia;Bacteroidales;Tannerellaceae;Parabacteroides;Parabacteroides_goldsteinii
k127_1861209	21461	db_customA	S	CP064353.1	99.995	1	21461	0	39626	21461	CP064353.1 Parabacteroides goldsteinii strain MTS01 chromosome; complete genome	100	1	Bacteria;Bacteroidota;Bacteroidia;Bacteroidales;Tannerellaceae;Parabacteroides;Parabacteroides_goldsteinii
k127_1876416	1168	db_customA	S	CP064353.1	99.052	1	210	7.14e-102	377	1168	CP064353.1 Parabacteroides goldsteinii strain MTS01 chromosome; complete genome	18.0651	1	Bacteria;Bacteroidota;Bacteroidia;Bacteroidales;Tannerellaceae;Parabacteroides;Parabacteroides_goldsteinii
k127_1883400	43132	db_customA	S	CP064353.1	99.917	1	43132	0	79453	43132	CP064353.1 Parabacteroides goldsteinii strain MTS01 chromosome; complete genome	100	1	Bacteria;Bacteroidota;Bacteroidia;Bacteroidales;Tannerellaceae;Parabacteroides;Parabacteroides_goldsteinii
k127_1967855	59781	db_customA	S	CP064353.1	99.965	1	59668	0	110100	59781	CP064353.1 Parabacteroides goldsteinii strain MTS01 chromosome; complete genome	99.8126	1	Bacteria;Bacteroidota;Bacteroidia;Bacteroidales;Tannerellaceae;Parabacteroides;Parabacteroides_goldsteinii
k127_19744	46284	db_customA	S	CP064353.1	99.962	14297	46251	0	58944	46284	CP064353.1 Parabacteroides goldsteinii strain MTS01 chromosome; complete genome	69.0411	2	Bacteria;Bacteroidota;Bacteroidia;Bacteroidales;Tannerellaceae;Parabacteroides;Parabacteroides_goldsteinii
k127_2011435	20590	db_customA	S	CP064353.1	99.845	1	20590	0	37846	20590	CP064353.1 Parabacteroides goldsteinii strain MTS01 chromosome; complete genome	100	1	Bacteria;Bacteroidota;Bacteroidia;Bacteroidales;Tannerellaceae;Parabacteroides;Parabacteroides_goldsteinii
k127_2047889	53798	db_customA	S	CP064353.1	99.926	1	53797	0	99123	53798	CP064353.1 Parabacteroides goldsteinii strain MTS01 chromosome; complete genome	99.9981	1	Bacteria;Bacteroidota;Bacteroidia;Bacteroidales;Tannerellaceae;Parabacteroides;Parabacteroides_goldsteinii
k127_2047909	1555	db_customA	S	CP064353.1	98.585	1	1555	0	2750	1555	CP064353.1 Parabacteroides goldsteinii strain MTS01 chromosome; complete genome	100	1	Bacteria;Bacteroidota;Bacteroidia;Bacteroidales;Tannerellaceae;Parabacteroides;Parabacteroides_goldsteinii
k127_2055548	907	db_customA	S	CP064353.1	97.244	1	907	0	1537	907	CP064353.1 Parabacteroides goldsteinii strain MTS01 chromosome; complete genome	100	1	Bacteria;Bacteroidota;Bacteroidia;Bacteroidales;Tannerellaceae;Parabacteroides;Parabacteroides_goldsteinii
k127_2080796	44364	db_customA	S	CP064353.1	99.966	1	44364	0	81842	44364	CP064353.1 Parabacteroides goldsteinii strain MTS01 chromosome; complete genome	100	1	Bacteria;Bacteroidota;Bacteroidia;Bacteroidales;Tannerellaceae;Parabacteroides;Parabacteroides_goldsteinii
k127_2081600	1291	db_customA	S	CP064353.1	97.622	264	1230	0	1659	1291	CP064353.1 Parabacteroides goldsteinii strain MTS01 chromosome; complete genome	74.9032	1	Bacteria;Bacteroidota;Bacteroidia;Bacteroidales;Tannerellaceae;Parabacteroides;Parabacteroides_goldsteinii
k127_2095411	3098	db_customA	S	CP064353.1	99.774	1	3098	0	5683	3098	CP064353.1 Parabacteroides goldsteinii strain MTS01 chromosome; complete genome	100	1	Bacteria;Bacteroidota;Bacteroidia;Bacteroidales;Tannerellaceae;Parabacteroides;Parabacteroides_goldsteinii
k127_2100051	36145	db_customA	S	CP064353.1	99.868	8775	36142	0	50338	36145	CP064353.1 Parabacteroides goldsteinii strain MTS01 chromosome; complete genome	75.72	1	Bacteria;Bacteroidota;Bacteroidia;Bacteroidales;Tannerellaceae;Parabacteroides;Parabacteroides_goldsteinii
k127_2118250	13818	db_customA	S	CP064353.1	99.913	1	13818	0	25451	13818	CP064353.1 Parabacteroides goldsteinii strain MTS01 chromosome; complete genome	100	1	Bacteria;Bacteroidota;Bacteroidia;Bacteroidales;Tannerellaceae;Parabacteroides;Parabacteroides_goldsteinii
k127_2131926	48263	db_customA	S	CP064353.1	99.997	326	34455	0	63021	48263	CP064353.1 Parabacteroides goldsteinii strain MTS01 chromosome; complete genome	70.7167	1	Bacteria;Bacteroidota;Bacteroidia;Bacteroidales;Tannerellaceae;Parabacteroides;Parabacteroides_goldsteinii
k127_2141282	4652	db_customA	S	CP064353.1	99.527	289	4514	0	7694	4652	CP064353.1 Parabacteroides goldsteinii strain MTS01 chromosome; complete genome	90.8426	1	Bacteria;Bacteroidota;Bacteroidia;Bacteroidales;Tannerellaceae;Parabacteroides;Parabacteroides_goldsteinii
k127_2280576	20967	db_customA	S	CP064353.1	99.868	6	13590	0	24988	20967	CP064353.1 Parabacteroides goldsteinii strain MTS01 chromosome; complete genome	64.7923	1	Bacteria;Bacteroidota;Bacteroidia;Bacteroidales;Tannerellaceae;Parabacteroides;Parabacteroides_goldsteinii
k127_2311449	28095	db_customA	S	CP064353.1	99.758	4	28095	0	51498	28095	CP064353.1 Parabacteroides goldsteinii strain MTS01 chromosome; complete genome	99.9893	1	Bacteria;Bacteroidota;Bacteroidia;Bacteroidales;Tannerellaceae;Parabacteroides;Parabacteroides_goldsteinii
k127_2314625	14333	db_customA	S	CP064353.1	99.571	113	14333	0	25920	14333	CP064353.1 Parabacteroides goldsteinii strain MTS01 chromosome; complete genome	99.2186	1	Bacteria;Bacteroidota;Bacteroidia;Bacteroidales;Tannerellaceae;Parabacteroides;Parabacteroides_goldsteinii
k127_2322946	4777	db_customA	S	CP064353.1	99.267	1	4777	0	8628	4777	CP064353.1 Parabacteroides goldsteinii strain MTS01 chromosome; complete genome	100	1	Bacteria;Bacteroidota;Bacteroidia;Bacteroidales;Tannerellaceae;Parabacteroides;Parabacteroides_goldsteinii
k127_232657	78617	db_customA	S	CP064353.1	99.964	35	78617	0	145000	78617	CP064353.1 Parabacteroides goldsteinii strain MTS01 chromosome; complete genome	99.9568	1	Bacteria;Bacteroidota;Bacteroidia;Bacteroidales;Tannerellaceae;Parabacteroides;Parabacteroides_goldsteinii
k127_2363137	71003	db_customA	S	CP064353.1	99.954	1	71003	0	130900	71003	CP064353.1 Parabacteroides goldsteinii strain MTS01 chromosome; complete genome	100	1	Bacteria;Bacteroidota;Bacteroidia;Bacteroidales;Tannerellaceae;Parabacteroides;Parabacteroides_goldsteinii
k127_2407609	31776	db_customA	S	CP064353.1	99.953	3	31776	0	58591	31776	CP064353.1 Parabacteroides goldsteinii strain MTS01 chromosome; complete genome	99.9937	1	Bacteria;Bacteroidota;Bacteroidia;Bacteroidales;Tannerellaceae;Parabacteroides;Parabacteroides_goldsteinii
k127_2504109	25625	db_customA	S	CP064353.1	99.953	1	25625	0	47255	25625	CP064353.1 Parabacteroides goldsteinii strain MTS01 chromosome; complete genome	100	1	Bacteria;Bacteroidota;Bacteroidia;Bacteroidales;Tannerellaceae;Parabacteroides;Parabacteroides_goldsteinii
k127_251587	11824	db_customA	S	CP081906.1	98.726	1	11450	0	20341	11824	CP081906.1 Parabacteroides goldsteinii strain BFG-241 chromosome; complete genome	96.8877	1	Bacteria;Bacteroidota;Bacteroidia;Bacteroidales;Tannerellaceae;Parabacteroides;Parabacteroides_goldsteinii
k127_2541185	10068	db_customA	S	CP064353.1	99.722	1	10063	0	18428	10068	CP064353.1 Parabacteroides goldsteinii strain MTS01 chromosome; complete genome	99.9503	1	Bacteria;Bacteroidota;Bacteroidia;Bacteroidales;Tannerellaceae;Parabacteroides;Parabacteroides_goldsteinii
k127_2557296	16045	db_customA	S	CP064353.1	100	1	16045	0	29630	16045	CP064353.1 Parabacteroides goldsteinii strain MTS01 chromosome; complete genome	100	1	Bacteria;Bacteroidota;Bacteroidia;Bacteroidales;Tannerellaceae;Parabacteroides;Parabacteroides_goldsteinii
k127_2566661	10946	db_customA	S	CP064353.1	99.836	1	10946	0	20112	10946	CP064353.1 Parabacteroides goldsteinii strain MTS01 chromosome; complete genome	100	1	Bacteria;Bacteroidota;Bacteroidia;Bacteroidales;Tannerellaceae;Parabacteroides;Parabacteroides_goldsteinii
k127_2574705	4827	db_customA	S	CP064353.1	99.642	1	4467	0	8161	4827	CP064353.1 Parabacteroides goldsteinii strain MTS01 chromosome; complete genome	92.542	1	Bacteria;Bacteroidota;Bacteroidia;Bacteroidales;Tannerellaceae;Parabacteroides;Parabacteroides_goldsteinii
k127_2617582	32580	db_customA	S	CP064353.1	99.862	55	32580	0	59815	32580	CP064353.1 Parabacteroides goldsteinii strain MTS01 chromosome; complete genome	99.8496	1	Bacteria;Bacteroidota;Bacteroidia;Bacteroidales;Tannerellaceae;Parabacteroides;Parabacteroides_goldsteinii
k127_262628	23627	db_customA	S	CP064353.1	99.915	1	23627	0	43526	23627	CP064353.1 Parabacteroides goldsteinii strain MTS01 chromosome; complete genome	100	1	Bacteria;Bacteroidota;Bacteroidia;Bacteroidales;Tannerellaceae;Parabacteroides;Parabacteroides_goldsteinii
k127_2673097	7425	db_customA	S	CP064353.1	99.731	1	7425	0	13601	7425	CP064353.1 Parabacteroides goldsteinii strain MTS01 chromosome; complete genome	100	1	Bacteria;Bacteroidota;Bacteroidia;Bacteroidales;Tannerellaceae;Parabacteroides;Parabacteroides_goldsteinii
k127_267715	41567	db_customA	S	CP064353.1	99.897	1	41567	0	76515	41567	CP064353.1 Parabacteroides goldsteinii strain MTS01 chromosome; complete genome	100	1	Bacteria;Bacteroidota;Bacteroidia;Bacteroidales;Tannerellaceae;Parabacteroides;Parabacteroides_goldsteinii
k127_2683450	17574	db_customA	S	CP064353.1	99.829	1	17574	0	32286	17574	CP064353.1 Parabacteroides goldsteinii strain MTS01 chromosome; complete genome	100	1	Bacteria;Bacteroidota;Bacteroidia;Bacteroidales;Tannerellaceae;Parabacteroides;Parabacteroides_goldsteinii
k127_26965	12688	db_customA	S	CP064353.1	99.913	94	12688	0	23198	12688	CP064353.1 Parabacteroides goldsteinii strain MTS01 chromosome; complete genome	99.267	1	Bacteria;Bacteroidota;Bacteroidia;Bacteroidales;Tannerellaceae;Parabacteroides;Parabacteroides_goldsteinii
k127_2725359	39286	db_customA	S	CP064353.1	99.972	1	39286	0	72485	39286	CP064353.1 Parabacteroides goldsteinii strain MTS01 chromosome; complete genome	100	1	Bacteria;Bacteroidota;Bacteroidia;Bacteroidales;Tannerellaceae;Parabacteroides;Parabacteroides_goldsteinii
k127_2727842	19106	db_customA	S	CP064353.1	99.853	1	19106	0	35126	19106	CP064353.1 Parabacteroides goldsteinii strain MTS01 chromosome; complete genome	100	1	Bacteria;Bacteroidota;Bacteroidia;Bacteroidales;Tannerellaceae;Parabacteroides;Parabacteroides_goldsteinii
k127_2741747	3572	db_customA	S	CP064353.1	98.964	1	3572	0	6392	3572	CP064353.1 Parabacteroides goldsteinii strain MTS01 chromosome; complete genome	100	1	Bacteria;Bacteroidota;Bacteroidia;Bacteroidales;Tannerellaceae;Parabacteroides;Parabacteroides_goldsteinii
k127_2757983	61174	db_customA	S	CP064353.1	99.916	1	51007	0	93953	61174	CP064353.1 Parabacteroides goldsteinii strain MTS01 chromosome; complete genome	83.3818	1	Bacteria;Bacteroidota;Bacteroidia;Bacteroidales;Tannerellaceae;Parabacteroides;Parabacteroides_goldsteinii
k127_2762433	48263	db_customA	S	CP064353.1	99.934	1	48187	0	88808	48263	CP064353.1 Parabacteroides goldsteinii strain MTS01 chromosome; complete genome	99.8425	1	Bacteria;Bacteroidota;Bacteroidia;Bacteroidales;Tannerellaceae;Parabacteroides;Parabacteroides_goldsteinii
k127_2785659	819	db_customA	S	CP064353.1	98.046	1	819	0	1424	819	CP064353.1 Parabacteroides goldsteinii strain MTS01 chromosome; complete genome	100	1	Bacteria;Bacteroidota;Bacteroidia;Bacteroidales;Tannerellaceae;Parabacteroides;Parabacteroides_goldsteinii
k127_2792248	42990	db_customA	S	CP064353.1	99.986	1	42990	0	79351	42990	CP064353.1 Parabacteroides goldsteinii strain MTS01 chromosome; complete genome	100	1	Bacteria;Bacteroidota;Bacteroidia;Bacteroidales;Tannerellaceae;Parabacteroides;Parabacteroides_goldsteinii
k127_2802170	4529	db_customA	S	CP064353.1	99.293	1	4529	0	8187	4529	CP064353.1 Parabacteroides goldsteinii strain MTS01 chromosome; complete genome	100	1	Bacteria;Bacteroidota;Bacteroidia;Bacteroidales;Tannerellaceae;Parabacteroides;Parabacteroides_goldsteinii
k127_2842126	8522	db_customA	S	CP064353.1	99.904	1	8317	0	15317	8522	CP064353.1 Parabacteroides goldsteinii strain MTS01 chromosome; complete genome	97.6179	1	Bacteria;Bacteroidota;Bacteroidia;Bacteroidales;Tannerellaceae;Parabacteroides;Parabacteroides_goldsteinii
k127_2950594	63920	db_customA	S	CP064353.1	99.964	233	63920	0	117500	63920	CP064353.1 Parabacteroides goldsteinii strain MTS01 chromosome; complete genome	99.6402	1	Bacteria;Bacteroidota;Bacteroidia;Bacteroidales;Tannerellaceae;Parabacteroides;Parabacteroides_goldsteinii
k127_2974101	77723	db_customA	S	CP064353.1	99.924	1	77723	0	143200	77723	CP064353.1 Parabacteroides goldsteinii strain MTS01 chromosome; complete genome	100	1	Bacteria;Bacteroidota;Bacteroidia;Bacteroidales;Tannerellaceae;Parabacteroides;Parabacteroides_goldsteinii
k127_2975543	13073	db_customA	S	CP064353.1	99.886	750	13073	0	22690	13073	CP064353.1 Parabacteroides goldsteinii strain MTS01 chromosome; complete genome	94.3471	1	Bacteria;Bacteroidota;Bacteroidia;Bacteroidales;Tannerellaceae;Parabacteroides;Parabacteroides_goldsteinii
k127_2982349	49754	db_customA	S	CP064353.1	99.942	182	49754	0	91382	49754	CP064353.1 Parabacteroides goldsteinii strain MTS01 chromosome; complete genome	99.6382	1	Bacteria;Bacteroidota;Bacteroidia;Bacteroidales;Tannerellaceae;Parabacteroides;Parabacteroides_goldsteinii
k127_3013159	5721	db_customA	S	CP064353.1	99.388	1	5719	0	10368	5721	CP064353.1 Parabacteroides goldsteinii strain MTS01 chromosome; complete genome	99.965	1	Bacteria;Bacteroidota;Bacteroidia;Bacteroidales;Tannerellaceae;Parabacteroides;Parabacteroides_goldsteinii
k127_3024289	2916	db_customA	S	CP064353.1	99.743	194	2916	0	4990	2916	CP064353.1 Parabacteroides goldsteinii strain MTS01 chromosome; complete genome	93.4156	1	Bacteria;Bacteroidota;Bacteroidia;Bacteroidales;Tannerellaceae;Parabacteroides;Parabacteroides_goldsteinii
k127_3068562	17910	db_customA	S	CP064353.1	99.663	1	17782	0	32504	17910	CP064353.1 Parabacteroides goldsteinii strain MTS01 chromosome; complete genome	99.2909	1	Bacteria;Bacteroidota;Bacteroidia;Bacteroidales;Tannerellaceae;Parabacteroides;Parabacteroides_goldsteinii
k127_3084148	62482	db_customA	S	CP064353.1	99.997	2299	62482	0	111100	62482	CP064353.1 Parabacteroides goldsteinii strain MTS01 chromosome; complete genome	96.3221	1	Bacteria;Bacteroidota;Bacteroidia;Bacteroidales;Tannerellaceae;Parabacteroides;Parabacteroides_goldsteinii
k127_3095501	18610	db_customA	S	CP064353.1	100	1	18610	0	34367	18610	CP064353.1 Parabacteroides goldsteinii strain MTS01 chromosome; complete genome	100	1	Bacteria;Bacteroidota;Bacteroidia;Bacteroidales;Tannerellaceae;Parabacteroides;Parabacteroides_goldsteinii
k127_3110639	852	db_customA	S	CP064353.1	98.122	1	852	0	1485	852	CP064353.1 Parabacteroides goldsteinii strain MTS01 chromosome; complete genome	100	1	Bacteria;Bacteroidota;Bacteroidia;Bacteroidales;Tannerellaceae;Parabacteroides;Parabacteroides_goldsteinii
k127_3121976	30692	db_customA	S	CP064353.1	99.86	16	30692	0	56410	30692	CP064353.1 Parabacteroides goldsteinii strain MTS01 chromosome; complete genome	99.9511	1	Bacteria;Bacteroidota;Bacteroidia;Bacteroidales;Tannerellaceae;Parabacteroides;Parabacteroides_goldsteinii
k127_315985	159349	db_customA	S	CP064353.1	99.959	3	159349	0	293900	159349	CP064353.1 Parabacteroides goldsteinii strain MTS01 chromosome; complete genome	100	1	Bacteria;Bacteroidota;Bacteroidia;Bacteroidales;Tannerellaceae;Parabacteroides;Parabacteroides_goldsteinii
k127_3176565	54182	db_customA	S	CP064353.1	99.929	3208	54182	0	93953	54182	CP064353.1 Parabacteroides goldsteinii strain MTS01 chromosome; complete genome	94.1254	1	Bacteria;Bacteroidota;Bacteroidia;Bacteroidales;Tannerellaceae;Parabacteroides;Parabacteroides_goldsteinii
k127_3179443	4269	db_customA	S	CP064353.1	100	1	4269	0	7884	4269	CP064353.1 Parabacteroides goldsteinii strain MTS01 chromosome; complete genome	100	1	Bacteria;Bacteroidota;Bacteroidia;Bacteroidales;Tannerellaceae;Parabacteroides;Parabacteroides_goldsteinii
k127_3201594	2974	db_customA	S	CP064353.1	98.42	1	2974	0	5232	2974	CP064353.1 Parabacteroides goldsteinii strain MTS01 chromosome; complete genome	100	1	Bacteria;Bacteroidota;Bacteroidia;Bacteroidales;Tannerellaceae;Parabacteroides;Parabacteroides_goldsteinii
k127_3203171	62240	db_customA	S	CP064353.1	99.997	1	37013	0	68345	62240	CP064353.1 Parabacteroides goldsteinii strain MTS01 chromosome; complete genome	59.4682	1	Bacteria;Bacteroidota;Bacteroidia;Bacteroidales;Tannerellaceae;Parabacteroides;Parabacteroides_goldsteinii
k127_3205919	24380	db_customA	S	CP064353.1	99.803	1	24378	0	44750	24380	CP064353.1 Parabacteroides goldsteinii strain MTS01 chromosome; complete genome	99.9959	1	Bacteria;Bacteroidota;Bacteroidia;Bacteroidales;Tannerellaceae;Parabacteroides;Parabacteroides_goldsteinii
k127_3233234	72791	db_customA	S	CP064353.1	99.986	1	72791	0	134400	72791	CP064353.1 Parabacteroides goldsteinii strain MTS01 chromosome; complete genome	100	1	Bacteria;Bacteroidota;Bacteroidia;Bacteroidales;Tannerellaceae;Parabacteroides;Parabacteroides_goldsteinii
k127_3256509	38465	db_customA	S	CP064353.1	99.925	8	38465	0	70857	38465	CP064353.1 Parabacteroides goldsteinii strain MTS01 chromosome; complete genome	99.9818	1	Bacteria;Bacteroidota;Bacteroidia;Bacteroidales;Tannerellaceae;Parabacteroides;Parabacteroides_goldsteinii
k127_3375816	9877	db_customA	S	CP064353.1	99.858	1	9877	0	18162	9877	CP064353.1 Parabacteroides goldsteinii strain MTS01 chromosome; complete genome	100	1	Bacteria;Bacteroidota;Bacteroidia;Bacteroidales;Tannerellaceae;Parabacteroides;Parabacteroides_goldsteinii
k127_339684	24103	db_customA	S	CP064353.1	99.838	1	24026	0	44152	24103	CP064353.1 Parabacteroides goldsteinii strain MTS01 chromosome; complete genome	99.6847	1	Bacteria;Bacteroidota;Bacteroidia;Bacteroidales;Tannerellaceae;Parabacteroides;Parabacteroides_goldsteinii
k127_3410369	70278	db_customA	S	CP064353.1	99.929	1	70278	0	129500	70278	CP064353.1 Parabacteroides goldsteinii strain MTS01 chromosome; complete genome	100	1	Bacteria;Bacteroidota;Bacteroidia;Bacteroidales;Tannerellaceae;Parabacteroides;Parabacteroides_goldsteinii
k127_3424477	18630	db_customA	S	CP064353.1	99.854	99	18630	0	34069	18630	CP064353.1 Parabacteroides goldsteinii strain MTS01 chromosome; complete genome	99.474	1	Bacteria;Bacteroidota;Bacteroidia;Bacteroidales;Tannerellaceae;Parabacteroides;Parabacteroides_goldsteinii
k127_3429424	4975	db_customA	S	CP064353.1	98.593	1	4975	0	8798	4975	CP064353.1 Parabacteroides goldsteinii strain MTS01 chromosome; complete genome	100	1	Bacteria;Bacteroidota;Bacteroidia;Bacteroidales;Tannerellaceae;Parabacteroides;Parabacteroides_goldsteinii
k127_3434103	43197	db_customA	S	CP064353.1	99.958	17141	43197	0	48056	43197	CP064353.1 Parabacteroides goldsteinii strain MTS01 chromosome; complete genome	60.3213	1	Bacteria;Bacteroidota;Bacteroidia;Bacteroidales;Tannerellaceae;Parabacteroides;Parabacteroides_goldsteinii
k127_3446879	4316	db_customA	S	CP064353.1	99.48	87	4314	0	7685	4316	CP064353.1 Parabacteroides goldsteinii strain MTS01 chromosome; complete genome	97.9611	1	Bacteria;Bacteroidota;Bacteroidia;Bacteroidales;Tannerellaceae;Parabacteroides;Parabacteroides_goldsteinii
k127_3464715	122096	db_customA	S	CP064353.1	99.961	44	121706	0	224400	122096	CP064353.1 Parabacteroides goldsteinii strain MTS01 chromosome; complete genome	99.6454	1	Bacteria;Bacteroidota;Bacteroidia;Bacteroidales;Tannerellaceae;Parabacteroides;Parabacteroides_goldsteinii
k127_3475404	5123	db_customA	S	CP064353.1	99.492	1	5122	0	9315	5123	CP064353.1 Parabacteroides goldsteinii strain MTS01 chromosome; complete genome	99.9805	1	Bacteria;Bacteroidota;Bacteroidia;Bacteroidales;Tannerellaceae;Parabacteroides;Parabacteroides_goldsteinii
k127_3476114	10220	db_customA	S	CP064353.1	99.873	1	10220	0	18801	10220	CP064353.1 Parabacteroides goldsteinii strain MTS01 chromosome; complete genome	100	1	Bacteria;Bacteroidota;Bacteroidia;Bacteroidales;Tannerellaceae;Parabacteroides;Parabacteroides_goldsteinii
k127_3497138	11115	db_customA	S	CP064353.1	99.759	53	10438	0	19041	11115	CP064353.1 Parabacteroides goldsteinii strain MTS01 chromosome; complete genome	93.4413	1	Bacteria;Bacteroidota;Bacteroidia;Bacteroidales;Tannerellaceae;Parabacteroides;Parabacteroides_goldsteinii
k127_3510010	48905	db_customA	S	CP064353.1	99.926	1	48905	0	90110	48905	CP064353.1 Parabacteroides goldsteinii strain MTS01 chromosome; complete genome	100	1	Bacteria;Bacteroidota;Bacteroidia;Bacteroidales;Tannerellaceae;Parabacteroides;Parabacteroides_goldsteinii
k127_3514767	3718	db_customA	S	CP064353.1	99.885	238	3718	0	6407	3718	CP064353.1 Parabacteroides goldsteinii strain MTS01 chromosome; complete genome	93.6256	1	Bacteria;Bacteroidota;Bacteroidia;Bacteroidales;Tannerellaceae;Parabacteroides;Parabacteroides_goldsteinii
k127_3514876	7580	db_customA	S	CP064353.1	99.512	1	7580	0	13793	7580	CP064353.1 Parabacteroides goldsteinii strain MTS01 chromosome; complete genome	100	1	Bacteria;Bacteroidota;Bacteroidia;Bacteroidales;Tannerellaceae;Parabacteroides;Parabacteroides_goldsteinii
k127_354946	42533	db_customA	S	CP064353.1	99.965	219	42533	0	78057	42533	CP064353.1 Parabacteroides goldsteinii strain MTS01 chromosome; complete genome	99.4898	1	Bacteria;Bacteroidota;Bacteroidia;Bacteroidales;Tannerellaceae;Parabacteroides;Parabacteroides_goldsteinii
k127_359101	254	nt	S	CP064353.1	99.606	1	254	1.91e-126	464	254	CP064353.1 Parabacteroides goldsteinii strain MTS01 chromosome; complete genome	100	1	Bacteria;Bacteroidota;Bacteroidia;Bacteroidales;Tannerellaceae;Parabacteroides;Parabacteroides_goldsteinii
k127_3677240	28729	db_customA	S	CP064353.1	99.884	177	28714	0	52517	28729	CP064353.1 Parabacteroides goldsteinii strain MTS01 chromosome; complete genome	99.3352	1	Bacteria;Bacteroidota;Bacteroidia;Bacteroidales;Tannerellaceae;Parabacteroides;Parabacteroides_goldsteinii
k127_3678320	15443	db_customA	S	CP064353.1	99.98	1	15221	0	28092	15443	CP064353.1 Parabacteroides goldsteinii strain MTS01 chromosome; complete genome	98.5625	1	Bacteria;Bacteroidota;Bacteroidia;Bacteroidales;Tannerellaceae;Parabacteroides;Parabacteroides_goldsteinii
k127_3699456	4500	db_customA	S	CP064353.1	98.937	2	4500	0	8059	4500	CP064353.1 Parabacteroides goldsteinii strain MTS01 chromosome; complete genome	100	1	Bacteria;Bacteroidota;Bacteroidia;Bacteroidales;Tannerellaceae;Parabacteroides;Parabacteroides_goldsteinii
k127_3712178	254	db_customA	S	CP064353.1	99.606	1	254	1.05e-128	464	254	CP064353.1 Parabacteroides goldsteinii strain MTS01 chromosome; complete genome	100	1	Bacteria;Bacteroidota;Bacteroidia;Bacteroidales;Tannerellaceae;Parabacteroides;Parabacteroides_goldsteinii
k127_37251	4121	db_customA	S	CP064353.1	99.83	1	4121	0	7572	4121	CP064353.1 Parabacteroides goldsteinii strain MTS01 chromosome; complete genome	100	1	Bacteria;Bacteroidota;Bacteroidia;Bacteroidales;Tannerellaceae;Parabacteroides;Parabacteroides_goldsteinii
k127_3851290	2287	db_customA	S	CP064353.1	99.587	1078	2287	0	2206	2287	CP064353.1 Parabacteroides goldsteinii strain MTS01 chromosome; complete genome	52.9077	1	Bacteria;Bacteroidota;Bacteroidia;Bacteroidales;Tannerellaceae;Parabacteroides;Parabacteroides_goldsteinii
k127_3863318	6060	db_customA	S	CP064353.1	99.868	1	6060	0	11147	6060	CP064353.1 Parabacteroides goldsteinii strain MTS01 chromosome; complete genome	100	1	Bacteria;Bacteroidota;Bacteroidia;Bacteroidales;Tannerellaceae;Parabacteroides;Parabacteroides_goldsteinii
k127_3864164	585	db_customA	S	CP064353.1	97.436	1	585	0	998	585	CP064353.1 Parabacteroides goldsteinii strain MTS01 chromosome; complete genome	100	1	Bacteria;Bacteroidota;Bacteroidia;Bacteroidales;Tannerellaceae;Parabacteroides;Parabacteroides_goldsteinii
k127_3883486	58841	db_customA	S	CP064353.1	99.949	1	58841	0	108500	58841	CP064353.1 Parabacteroides goldsteinii strain MTS01 chromosome; complete genome	100	1	Bacteria;Bacteroidota;Bacteroidia;Bacteroidales;Tannerellaceae;Parabacteroides;Parabacteroides_goldsteinii
k127_3889538	50793	db_customA	S	CP064353.1	99.97	1	50793	0	93713	50793	CP064353.1 Parabacteroides goldsteinii strain MTS01 chromosome; complete genome	100	1	Bacteria;Bacteroidota;Bacteroidia;Bacteroidales;Tannerellaceae;Parabacteroides;Parabacteroides_goldsteinii
k127_3901183	3727	db_customA	S	CP064353.1	99.908	460	3727	0	6019	3727	CP064353.1 Parabacteroides goldsteinii strain MTS01 chromosome; complete genome	87.6845	1	Bacteria;Bacteroidota;Bacteroidia;Bacteroidales;Tannerellaceae;Parabacteroides;Parabacteroides_goldsteinii
k127_3906231	10282	db_customA	S	CP064353.1	99.854	1	10282	0	18903	10282	CP064353.1 Parabacteroides goldsteinii strain MTS01 chromosome; complete genome	100	1	Bacteria;Bacteroidota;Bacteroidia;Bacteroidales;Tannerellaceae;Parabacteroides;Parabacteroides_goldsteinii
k127_3929482	47765	db_customA	S	CP064353.1	99.923	4	45242	0	83347	47765	CP064353.1 Parabacteroides goldsteinii strain MTS01 chromosome; complete genome	94.7116	1	Bacteria;Bacteroidota;Bacteroidia;Bacteroidales;Tannerellaceae;Parabacteroides;Parabacteroides_goldsteinii
k127_3943668	123701	db_customA	S	CP064353.1	99.993	36045	123701	0	161800	123701	CP064353.1 Parabacteroides goldsteinii strain MTS01 chromosome; complete genome	70.8628	1	Bacteria;Bacteroidota;Bacteroidia;Bacteroidales;Tannerellaceae;Parabacteroides;Parabacteroides_goldsteinii
k127_39774	63439	db_customA	S	CP064353.1	99.915	23239	63439	0	74049	63439	CP064353.1 Parabacteroides goldsteinii strain MTS01 chromosome; complete genome	63.3711	2	Bacteria;Bacteroidota;Bacteroidia;Bacteroidales;Tannerellaceae;Parabacteroides;Parabacteroides_goldsteinii
k127_4013049	28629	db_customA	S	CP064353.1	99.885	1	28629	0	52684	28629	CP064353.1 Parabacteroides goldsteinii strain MTS01 chromosome; complete genome	100	1	Bacteria;Bacteroidota;Bacteroidia;Bacteroidales;Tannerellaceae;Parabacteroides;Parabacteroides_goldsteinii
k127_40644	14685	db_customA	S	CP064353.1	99.761	1	14637	0	26836	14685	CP064353.1 Parabacteroides goldsteinii strain MTS01 chromosome; complete genome	99.6799	1	Bacteria;Bacteroidota;Bacteroidia;Bacteroidales;Tannerellaceae;Parabacteroides;Parabacteroides_goldsteinii
k127_4070449	11652	db_customA	S	CP064353.1	99.906	1	11652	0	21455	11652	CP064353.1 Parabacteroides goldsteinii strain MTS01 chromosome; complete genome	100	1	Bacteria;Bacteroidota;Bacteroidia;Bacteroidales;Tannerellaceae;Parabacteroides;Parabacteroides_goldsteinii
k127_4109231	35178	db_customA	S	CP064353.1	99.903	1	35178	0	64770	35178	CP064353.1 Parabacteroides goldsteinii strain MTS01 chromosome; complete genome	100	1	Bacteria;Bacteroidota;Bacteroidia;Bacteroidales;Tannerellaceae;Parabacteroides;Parabacteroides_goldsteinii
k127_4132028	83497	db_customA	S	CP064353.1	99.884	1	83493	0	153600	83497	CP064353.1 Parabacteroides goldsteinii strain MTS01 chromosome; complete genome	99.9952	1	Bacteria;Bacteroidota;Bacteroidia;Bacteroidales;Tannerellaceae;Parabacteroides;Parabacteroides_goldsteinii
k127_4157476	2116	db_customA	S	CP064353.1	97.637	1	2116	0	3631	2116	CP064353.1 Parabacteroides goldsteinii strain MTS01 chromosome; complete genome	100	1	Bacteria;Bacteroidota;Bacteroidia;Bacteroidales;Tannerellaceae;Parabacteroides;Parabacteroides_goldsteinii
k127_4175744	149868	db_customA	S	CP064353.1	99.978	50919	149711	0	182300	149868	CP064353.1 Parabacteroides goldsteinii strain MTS01 chromosome; complete genome	65.9207	2	Bacteria;Bacteroidota;Bacteroidia;Bacteroidales;Tannerellaceae;Parabacteroides;Parabacteroides_goldsteinii
k127_4314482	19278	db_customA	S	CP064353.1	99.824	1	19278	0	35410	19278	CP064353.1 Parabacteroides goldsteinii strain MTS01 chromosome; complete genome	100	1	Bacteria;Bacteroidota;Bacteroidia;Bacteroidales;Tannerellaceae;Parabacteroides;Parabacteroides_goldsteinii
k127_4314657	1216	db_customA	S	CP064353.1	99.095	1	1216	0	2185	1216	CP064353.1 Parabacteroides goldsteinii strain MTS01 chromosome; complete genome	100	1	Bacteria;Bacteroidota;Bacteroidia;Bacteroidales;Tannerellaceae;Parabacteroides;Parabacteroides_goldsteinii
k127_4316	788	db_customA	S	CP064353.1	98.35	1	788	0	1384	788	CP064353.1 Parabacteroides goldsteinii strain MTS01 chromosome; complete genome	100	1	Bacteria;Bacteroidota;Bacteroidia;Bacteroidales;Tannerellaceae;Parabacteroides;Parabacteroides_goldsteinii
k127_4320875	518	db_customA	S	CP064353.1	98.456	1	518	0	913	518	CP064353.1 Parabacteroides goldsteinii strain MTS01 chromosome; complete genome	100	1	Bacteria;Bacteroidota;Bacteroidia;Bacteroidales;Tannerellaceae;Parabacteroides;Parabacteroides_goldsteinii
k127_4325861	1508	db_customA	S	CP064353.1	100	1	1508	0	2785	1508	CP064353.1 Parabacteroides goldsteinii strain MTS01 chromosome; complete genome	100	1	Bacteria;Bacteroidota;Bacteroidia;Bacteroidales;Tannerellaceae;Parabacteroides;Parabacteroides_goldsteinii
k127_4330	94696	db_customA	S	CP064353.1	99.922	35663	94696	0	108800	94696	CP064353.1 Parabacteroides goldsteinii strain MTS01 chromosome; complete genome	62.3511	4	Bacteria;Bacteroidota;Bacteroidia;Bacteroidales;Tannerellaceae;Parabacteroides;Parabacteroides_goldsteinii
k127_4335529	41314	db_customA	S	CP064353.1	99.99	1	41314	0	76273	41314	CP064353.1 Parabacteroides goldsteinii strain MTS01 chromosome; complete genome	100	1	Bacteria;Bacteroidota;Bacteroidia;Bacteroidales;Tannerellaceae;Parabacteroides;Parabacteroides_goldsteinii
k127_4366174	12348	db_customA	S	CP064353.1	99.992	1	12137	0	22408	12348	CP064353.1 Parabacteroides goldsteinii strain MTS01 chromosome; complete genome	98.2912	1	Bacteria;Bacteroidota;Bacteroidia;Bacteroidales;Tannerellaceae;Parabacteroides;Parabacteroides_goldsteinii
k127_4367616	739	db_customA	S	CP064353.1	98.812	235	739	0	900	739	CP064353.1 Parabacteroides goldsteinii strain MTS01 chromosome; complete genome	68.3356	1	Bacteria;Bacteroidota;Bacteroidia;Bacteroidales;Tannerellaceae;Parabacteroides;Parabacteroides_goldsteinii
k127_4397199	1912	db_customA	S	CP064353.1	97.255	55	1912	0	3147	1912	CP064353.1 Parabacteroides goldsteinii strain MTS01 chromosome; complete genome	97.1757	1	Bacteria;Bacteroidota;Bacteroidia;Bacteroidales;Tannerellaceae;Parabacteroides;Parabacteroides_goldsteinii
k127_4437955	41856	db_customA	S	CP064353.1	99.978	1	41856	0	77244	41856	CP064353.1 Parabacteroides goldsteinii strain MTS01 chromosome; complete genome	100	1	Bacteria;Bacteroidota;Bacteroidia;Bacteroidales;Tannerellaceae;Parabacteroides;Parabacteroides_goldsteinii
k127_4534746	5265	db_customA	S	CP064353.1	99.545	1	5265	0	9592	5265	CP064353.1 Parabacteroides goldsteinii strain MTS01 chromosome; complete genome	100	1	Bacteria;Bacteroidota;Bacteroidia;Bacteroidales;Tannerellaceae;Parabacteroides;Parabacteroides_goldsteinii
k127_4556071	17864	db_customA	S	CP064353.1	99.664	1	17864	0	32657	17864	CP064353.1 Parabacteroides goldsteinii strain MTS01 chromosome; complete genome	100	1	Bacteria;Bacteroidota;Bacteroidia;Bacteroidales;Tannerellaceae;Parabacteroides;Parabacteroides_goldsteinii
k127_4572894	13461	db_customA	S	CP064353.1	99.788	237	13461	0	24247	13461	CP064353.1 Parabacteroides goldsteinii strain MTS01 chromosome; complete genome	98.2468	1	Bacteria;Bacteroidota;Bacteroidia;Bacteroidales;Tannerellaceae;Parabacteroides;Parabacteroides_goldsteinii
k127_4578205	724	db_customA	S	CP064353.1	98.024	1	506	0	880	724	CP064353.1 Parabacteroides goldsteinii strain MTS01 chromosome; complete genome	69.8895	1	Bacteria;Bacteroidota;Bacteroidia;Bacteroidales;Tannerellaceae;Parabacteroides;Parabacteroides_goldsteinii
k127_4605162	3842	db_customA	S	CP064353.1	98.415	1	3842	0	6761	3842	CP064353.1 Parabacteroides goldsteinii strain MTS01 chromosome; complete genome	100	1	Bacteria;Bacteroidota;Bacteroidia;Bacteroidales;Tannerellaceae;Parabacteroides;Parabacteroides_goldsteinii
k127_4612927	27220	db_customA	S	CP064353.1	99.886	1	27220	0	50087	27220	CP064353.1 Parabacteroides goldsteinii strain MTS01 chromosome; complete genome	100	1	Bacteria;Bacteroidota;Bacteroidia;Bacteroidales;Tannerellaceae;Parabacteroides;Parabacteroides_goldsteinii
k127_4623759	37769	db_customA	S	CP064353.1	99.918	101	37769	0	69388	37769	CP064353.1 Parabacteroides goldsteinii strain MTS01 chromosome; complete genome	99.7379	1	Bacteria;Bacteroidota;Bacteroidia;Bacteroidales;Tannerellaceae;Parabacteroides;Parabacteroides_goldsteinii
k127_4631198	1692	db_customA	S	CP064353.1	97.459	1	1692	0	2887	1692	CP064353.1 Parabacteroides goldsteinii strain MTS01 chromosome; complete genome	100	1	Bacteria;Bacteroidota;Bacteroidia;Bacteroidales;Tannerellaceae;Parabacteroides;Parabacteroides_goldsteinii
k127_4650295	4091	db_customA	S	CP064353.1	99.78	1	4091	0	7505	4091	CP064353.1 Parabacteroides goldsteinii strain MTS01 chromosome; complete genome	100	1	Bacteria;Bacteroidota;Bacteroidia;Bacteroidales;Tannerellaceae;Parabacteroides;Parabacteroides_goldsteinii
k127_4652252	4983	db_customA	S	CP064353.1	99.498	1	4983	0	9064	4983	CP064353.1 Parabacteroides goldsteinii strain MTS01 chromosome; complete genome	100	1	Bacteria;Bacteroidota;Bacteroidia;Bacteroidales;Tannerellaceae;Parabacteroides;Parabacteroides_goldsteinii
k127_4676716	57254	db_customA	S	CP064353.1	99.974	1	31121	0	57428	57254	CP064353.1 Parabacteroides goldsteinii strain MTS01 chromosome; complete genome	54.363	1	Bacteria;Bacteroidota;Bacteroidia;Bacteroidales;Tannerellaceae;Parabacteroides;Parabacteroides_goldsteinii
k127_467727	9183	db_customA	S	CP064353.1	99.22	1	9102	0	16415	9183	CP064353.1 Parabacteroides goldsteinii strain MTS01 chromosome; complete genome	99.1179	1	Bacteria;Bacteroidota;Bacteroidia;Bacteroidales;Tannerellaceae;Parabacteroides;Parabacteroides_goldsteinii
k127_467738	9172	db_customA	S	CP064353.1	99.804	1	9172	0	16838	9172	CP064353.1 Parabacteroides goldsteinii strain MTS01 chromosome; complete genome	100	1	Bacteria;Bacteroidota;Bacteroidia;Bacteroidales;Tannerellaceae;Parabacteroides;Parabacteroides_goldsteinii
k127_4708856	11820	db_customA	S	CP064353.1	100	1	11820	0	21828	11820	CP064353.1 Parabacteroides goldsteinii strain MTS01 chromosome; complete genome	100	1	Bacteria;Bacteroidota;Bacteroidia;Bacteroidales;Tannerellaceae;Parabacteroides;Parabacteroides_goldsteinii
k127_473263	1132	db_customA	S	CP064353.1	99.735	1	1132	0	2074	1132	CP064353.1 Parabacteroides goldsteinii strain MTS01 chromosome; complete genome	100	1	Bacteria;Bacteroidota;Bacteroidia;Bacteroidales;Tannerellaceae;Parabacteroides;Parabacteroides_goldsteinii
k127_4740713	67150	db_customA	S	CP064353.1	99.931	4	67150	0	123700	67150	CP064353.1 Parabacteroides goldsteinii strain MTS01 chromosome; complete genome	99.997	1	Bacteria;Bacteroidota;Bacteroidia;Bacteroidales;Tannerellaceae;Parabacteroides;Parabacteroides_goldsteinii
k127_4769245	45437	db_customA	S	CP064353.1	99.938	1	45426	0	83733	45437	CP064353.1 Parabacteroides goldsteinii strain MTS01 chromosome; complete genome	99.9824	1	Bacteria;Bacteroidota;Bacteroidia;Bacteroidales;Tannerellaceae;Parabacteroides;Parabacteroides_goldsteinii
k127_4794708	1781	db_customA	S	CP064353.1	97.284	1	1653	0	2806	1781	CP064353.1 Parabacteroides goldsteinii strain MTS01 chromosome; complete genome	93.0376	1	Bacteria;Bacteroidota;Bacteroidia;Bacteroidales;Tannerellaceae;Parabacteroides;Parabacteroides_goldsteinii
k127_482847	57476	db_customA	S	CP064353.1	99.97	1	57476	0	106000	57476	CP064353.1 Parabacteroides goldsteinii strain MTS01 chromosome; complete genome	100	1	Bacteria;Bacteroidota;Bacteroidia;Bacteroidales;Tannerellaceae;Parabacteroides;Parabacteroides_goldsteinii
k127_4888668	255	nt	S	CP064353.1	99.608	1	255	5.35e-127	466	255	CP064353.1 Parabacteroides goldsteinii strain MTS01 chromosome; complete genome	100	1	Bacteria;Bacteroidota;Bacteroidia;Bacteroidales;Tannerellaceae;Parabacteroides;Parabacteroides_goldsteinii
k127_4906895	99469	db_customA	S	CP064353.1	99.942	3	99469	0	183400	99469	CP064353.1 Parabacteroides goldsteinii strain MTS01 chromosome; complete genome	99.999	1	Bacteria;Bacteroidota;Bacteroidia;Bacteroidales;Tannerellaceae;Parabacteroides;Parabacteroides_goldsteinii
k127_4940016	21049	db_customA	S	CP064353.1	99.886	1	21049	0	38738	21049	CP064353.1 Parabacteroides goldsteinii strain MTS01 chromosome; complete genome	100	1	Bacteria;Bacteroidota;Bacteroidia;Bacteroidales;Tannerellaceae;Parabacteroides;Parabacteroides_goldsteinii
k127_5021796	487	db_customA	S	CP064353.1	98.768	1	487	0	867	487	CP064353.1 Parabacteroides goldsteinii strain MTS01 chromosome; complete genome	100	1	Bacteria;Bacteroidota;Bacteroidia;Bacteroidales;Tannerellaceae;Parabacteroides;Parabacteroides_goldsteinii
k127_5030217	41683	db_customA	S	CP064353.1	99.976	245	41683	0	76463	41683	CP064353.1 Parabacteroides goldsteinii strain MTS01 chromosome; complete genome	99.417	1	Bacteria;Bacteroidota;Bacteroidia;Bacteroidales;Tannerellaceae;Parabacteroides;Parabacteroides_goldsteinii
k127_5051550	743	db_customA	S	CP064353.1	99.192	1	743	0	1339	743	CP064353.1 Parabacteroides goldsteinii strain MTS01 chromosome; complete genome	100	1	Bacteria;Bacteroidota;Bacteroidia;Bacteroidales;Tannerellaceae;Parabacteroides;Parabacteroides_goldsteinii
k127_5102826	59127	db_customA	S	CP064353.1	99.922	1	59127	0	108900	59127	CP064353.1 Parabacteroides goldsteinii strain MTS01 chromosome; complete genome	100	1	Bacteria;Bacteroidota;Bacteroidia;Bacteroidales;Tannerellaceae;Parabacteroides;Parabacteroides_goldsteinii
k127_5109118	42495	db_customA	S	CP064353.1	99.828	1	42475	0	78029	42495	CP064353.1 Parabacteroides goldsteinii strain MTS01 chromosome; complete genome	99.9553	1	Bacteria;Bacteroidota;Bacteroidia;Bacteroidales;Tannerellaceae;Parabacteroides;Parabacteroides_goldsteinii
k127_5111514	929	db_customA	S	CP064353.1	99.031	1	929	0	1666	929	CP064353.1 Parabacteroides goldsteinii strain MTS01 chromosome; complete genome	100	1	Bacteria;Bacteroidota;Bacteroidia;Bacteroidales;Tannerellaceae;Parabacteroides;Parabacteroides_goldsteinii
k127_5170429	30484	db_customA	S	CP064353.1	99.901	5	30235	0	55660	30484	CP064353.1 Parabacteroides goldsteinii strain MTS01 chromosome; complete genome	99.1701	1	Bacteria;Bacteroidota;Bacteroidia;Bacteroidales;Tannerellaceae;Parabacteroides;Parabacteroides_goldsteinii
k127_5228010	22136	db_customA	S	CP064353.1	99.819	55	22136	0	40557	22136	CP064353.1 Parabacteroides goldsteinii strain MTS01 chromosome; complete genome	99.7606	1	Bacteria;Bacteroidota;Bacteroidia;Bacteroidales;Tannerellaceae;Parabacteroides;Parabacteroides_goldsteinii
k127_5246025	81412	db_customA	S	CP064353.1	99.948	1	81412	0	150100	81412	CP064353.1 Parabacteroides goldsteinii strain MTS01 chromosome; complete genome	100	1	Bacteria;Bacteroidota;Bacteroidia;Bacteroidales;Tannerellaceae;Parabacteroides;Parabacteroides_goldsteinii
k127_5256493	5359	db_customA	S	CP064353.1	99.757	1	5359	0	9825	5359	CP064353.1 Parabacteroides goldsteinii strain MTS01 chromosome; complete genome	100	1	Bacteria;Bacteroidota;Bacteroidia;Bacteroidales;Tannerellaceae;Parabacteroides;Parabacteroides_goldsteinii
k127_526344	38913	db_customA	S	CP064353.1	99.948	1	38212	0	70452	38913	CP064353.1 Parabacteroides goldsteinii strain MTS01 chromosome; complete genome	98.1985	1	Bacteria;Bacteroidota;Bacteroidia;Bacteroidales;Tannerellaceae;Parabacteroides;Parabacteroides_goldsteinii
k127_5275850	629	nt	S	CP064353.1	99.046	1	629	0	1129	629	CP064353.1 Parabacteroides goldsteinii strain MTS01 chromosome; complete genome	100	1	Bacteria;Bacteroidota;Bacteroidia;Bacteroidales;Tannerellaceae;Parabacteroides;Parabacteroides_goldsteinii
k127_52822	85608	db_customA	S	CP064353.1	99.984	2710	83882	0	149800	85608	CP064353.1 Parabacteroides goldsteinii strain MTS01 chromosome; complete genome	94.8217	1	Bacteria;Bacteroidota;Bacteroidia;Bacteroidales;Tannerellaceae;Parabacteroides;Parabacteroides_goldsteinii
k127_5314664	41565	db_customA	S	CP064353.1	99.954	256	41565	0	76164	41565	CP064353.1 Parabacteroides goldsteinii strain MTS01 chromosome; complete genome	99.3865	1	Bacteria;Bacteroidota;Bacteroidia;Bacteroidales;Tannerellaceae;Parabacteroides;Parabacteroides_goldsteinii
k127_5355008	25491	db_customA	S	CP064353.1	99.959	1	22053	0	40673	25491	CP064353.1 Parabacteroides goldsteinii strain MTS01 chromosome; complete genome	86.5129	1	Bacteria;Bacteroidota;Bacteroidia;Bacteroidales;Tannerellaceae;Parabacteroides;Parabacteroides_goldsteinii
k127_5367608	621	db_customA	S	CP064353.1	97.907	1	621	0	1075	621	CP064353.1 Parabacteroides goldsteinii strain MTS01 chromosome; complete genome	100	1	Bacteria;Bacteroidota;Bacteroidia;Bacteroidales;Tannerellaceae;Parabacteroides;Parabacteroides_goldsteinii
k127_5461949	109472	db_customA	S	CP064353.1	99.963	7	109472	0	201900	109472	CP064353.1 Parabacteroides goldsteinii strain MTS01 chromosome; complete genome	99.9954	1	Bacteria;Bacteroidota;Bacteroidia;Bacteroidales;Tannerellaceae;Parabacteroides;Parabacteroides_goldsteinii
k127_5480399	1047	db_customA	S	CP064353.1	97.612	1	1047	0	1796	1047	CP064353.1 Parabacteroides goldsteinii strain MTS01 chromosome; complete genome	100	1	Bacteria;Bacteroidota;Bacteroidia;Bacteroidales;Tannerellaceae;Parabacteroides;Parabacteroides_goldsteinii
k127_5484721	4859	db_customA	S	CP064353.1	99.28	1	4859	0	8780	4859	CP064353.1 Parabacteroides goldsteinii strain MTS01 chromosome; complete genome	100	1	Bacteria;Bacteroidota;Bacteroidia;Bacteroidales;Tannerellaceae;Parabacteroides;Parabacteroides_goldsteinii
k127_5484810	25478	db_customA	S	CP064353.1	99.949	1	25477	0	46976	25478	CP064353.1 Parabacteroides goldsteinii strain MTS01 chromosome; complete genome	99.9961	1	Bacteria;Bacteroidota;Bacteroidia;Bacteroidales;Tannerellaceae;Parabacteroides;Parabacteroides_goldsteinii
k127_5498923	24827	db_customA	S	CP064353.1	99.827	1	24827	0	45609	24827	CP064353.1 Parabacteroides goldsteinii strain MTS01 chromosome; complete genome	100	1	Bacteria;Bacteroidota;Bacteroidia;Bacteroidales;Tannerellaceae;Parabacteroides;Parabacteroides_goldsteinii
k127_5508	19131	db_customA	S	CP064353.1	99.88	1	19131	0	35201	19131	CP064353.1 Parabacteroides goldsteinii strain MTS01 chromosome; complete genome	100	1	Bacteria;Bacteroidota;Bacteroidia;Bacteroidales;Tannerellaceae;Parabacteroides;Parabacteroides_goldsteinii
k127_5519636	991	db_customA	S	CP064353.1	97.278	1	991	0	1681	991	CP064353.1 Parabacteroides goldsteinii strain MTS01 chromosome; complete genome	100	1	Bacteria;Bacteroidota;Bacteroidia;Bacteroidales;Tannerellaceae;Parabacteroides;Parabacteroides_goldsteinii
k127_55415	15020	db_customA	S	CP064353.1	99.8	1	15020	0	27571	15020	CP064353.1 Parabacteroides goldsteinii strain MTS01 chromosome; complete genome	100	1	Bacteria;Bacteroidota;Bacteroidia;Bacteroidales;Tannerellaceae;Parabacteroides;Parabacteroides_goldsteinii
k127_5659917	1265	db_customA	S	CP064353.1	98.419	1	1265	0	2226	1265	CP064353.1 Parabacteroides goldsteinii strain MTS01 chromosome; complete genome	100	1	Bacteria;Bacteroidota;Bacteroidia;Bacteroidales;Tannerellaceae;Parabacteroides;Parabacteroides_goldsteinii
k127_567141	49295	db_customA	S	CP081906.1	98.311	20289	49295	0	50852	49295	CP081906.1 Parabacteroides goldsteinii strain BFG-241 chromosome; complete genome	58.8498	1	Bacteria;Bacteroidota;Bacteroidia;Bacteroidales;Tannerellaceae;Parabacteroides;Parabacteroides_goldsteinii
k127_5715146	17351	db_customA	S	CP064353.1	99.954	1	17351	0	31996	17351	CP064353.1 Parabacteroides goldsteinii strain MTS01 chromosome; complete genome	100	1	Bacteria;Bacteroidota;Bacteroidia;Bacteroidales;Tannerellaceae;Parabacteroides;Parabacteroides_goldsteinii
k127_5731976	13179	db_customA	S	CP064353.1	99.893	1	13100	0	24114	13179	CP064353.1 Parabacteroides goldsteinii strain MTS01 chromosome; complete genome	99.4006	1	Bacteria;Bacteroidota;Bacteroidia;Bacteroidales;Tannerellaceae;Parabacteroides;Parabacteroides_goldsteinii
k127_5747035	835	db_customA	S	CP064353.1	100	1	835	0	1543	835	CP064353.1 Parabacteroides goldsteinii strain MTS01 chromosome; complete genome	100	1	Bacteria;Bacteroidota;Bacteroidia;Bacteroidales;Tannerellaceae;Parabacteroides;Parabacteroides_goldsteinii
k127_5756248	6866	db_customA	S	CP064353.1	98.952	1	6862	0	12268	6866	CP064353.1 Parabacteroides goldsteinii strain MTS01 chromosome; complete genome	100	1	Bacteria;Bacteroidota;Bacteroidia;Bacteroidales;Tannerellaceae;Parabacteroides;Parabacteroides_goldsteinii
k127_5756329	3274	db_customA	S	CP064353.1	98.735	32	3273	0	5760	3274	CP064353.1 Parabacteroides goldsteinii strain MTS01 chromosome; complete genome	99.0226	1	Bacteria;Bacteroidota;Bacteroidia;Bacteroidales;Tannerellaceae;Parabacteroides;Parabacteroides_goldsteinii
k127_5774458	32801	db_customA	S	CP064353.1	99.979	1	32801	0	60532	32801	CP064353.1 Parabacteroides goldsteinii strain MTS01 chromosome; complete genome	100	1	Bacteria;Bacteroidota;Bacteroidia;Bacteroidales;Tannerellaceae;Parabacteroides;Parabacteroides_goldsteinii
k127_5775499	712	db_customA	S	CP064353.1	98.174	1	712	0	1243	712	CP064353.1 Parabacteroides goldsteinii strain MTS01 chromosome; complete genome	100	1	Bacteria;Bacteroidota;Bacteroidia;Bacteroidales;Tannerellaceae;Parabacteroides;Parabacteroides_goldsteinii
k127_5833372	9060	db_customA	S	CP064353.1	99.592	3	9060	0	16523	9060	CP064353.1 Parabacteroides goldsteinii strain MTS01 chromosome; complete genome	99.9779	1	Bacteria;Bacteroidota;Bacteroidia;Bacteroidales;Tannerellaceae;Parabacteroides;Parabacteroides_goldsteinii
k127_5869573	4138	db_customA	S	CP064353.1	99.178	1	4138	0	7454	4138	CP064353.1 Parabacteroides goldsteinii strain MTS01 chromosome; complete genome	100	1	Bacteria;Bacteroidota;Bacteroidia;Bacteroidales;Tannerellaceae;Parabacteroides;Parabacteroides_goldsteinii
k127_5871311	457	nt	S	CP064353.1	98.031	1	457	0	795	457	CP064353.1 Parabacteroides goldsteinii strain MTS01 chromosome; complete genome	100	1	Bacteria;Bacteroidota;Bacteroidia;Bacteroidales;Tannerellaceae;Parabacteroides;Parabacteroides_goldsteinii
k127_588653	18586	db_customA	S	CP064353.1	99.801	1	18586	0	34117	18586	CP064353.1 Parabacteroides goldsteinii strain MTS01 chromosome; complete genome	100	1	Bacteria;Bacteroidota;Bacteroidia;Bacteroidales;Tannerellaceae;Parabacteroides;Parabacteroides_goldsteinii
k127_5913201	7165	db_customA	S	CP064353.1	99.679	1	7164	0	13104	7165	CP064353.1 Parabacteroides goldsteinii strain MTS01 chromosome; complete genome	100	1	Bacteria;Bacteroidota;Bacteroidia;Bacteroidales;Tannerellaceae;Parabacteroides;Parabacteroides_goldsteinii
k127_5943442	3206	db_customA	S	CP064353.1	99.626	1	3206	0	5854	3206	CP064353.1 Parabacteroides goldsteinii strain MTS01 chromosome; complete genome	100	1	Bacteria;Bacteroidota;Bacteroidia;Bacteroidales;Tannerellaceae;Parabacteroides;Parabacteroides_goldsteinii
k127_5953260	102972	db_customA	S	CP064353.1	99.969	18689	102972	0	155500	102972	CP064353.1 Parabacteroides goldsteinii strain MTS01 chromosome; complete genome	81.8553	1	Bacteria;Bacteroidota;Bacteroidia;Bacteroidales;Tannerellaceae;Parabacteroides;Parabacteroides_goldsteinii
k127_5959011	13595	db_customA	S	CP064353.1	99.703	13	13125	0	24000	13595	CP064353.1 Parabacteroides goldsteinii strain MTS01 chromosome; complete genome	96.4619	1	Bacteria;Bacteroidota;Bacteroidia;Bacteroidales;Tannerellaceae;Parabacteroides;Parabacteroides_goldsteinii
k127_5961906	4054	db_customA	S	CP064353.1	98.704	120	4054	0	6985	4054	CP064353.1 Parabacteroides goldsteinii strain MTS01 chromosome; complete genome	97.0646	1	Bacteria;Bacteroidota;Bacteroidia;Bacteroidales;Tannerellaceae;Parabacteroides;Parabacteroides_goldsteinii
k127_5967947	5090	db_customA	S	CP064353.1	98.907	1	4848	0	8660	5090	CP064353.1 Parabacteroides goldsteinii strain MTS01 chromosome; complete genome	95.2456	1	Bacteria;Bacteroidota;Bacteroidia;Bacteroidales;Tannerellaceae;Parabacteroides;Parabacteroides_goldsteinii
k127_5974840	2088	db_customA	S	CP064353.1	97.064	1	2078	0	3500	2088	CP064353.1 Parabacteroides goldsteinii strain MTS01 chromosome; complete genome	99.5211	1	Bacteria;Bacteroidota;Bacteroidia;Bacteroidales;Tannerellaceae;Parabacteroides;Parabacteroides_goldsteinii
k127_5980301	11878	db_customA	S	CP064353.1	99.36	1	11878	0	21514	11878	CP064353.1 Parabacteroides goldsteinii strain MTS01 chromosome; complete genome	100	1	Bacteria;Bacteroidota;Bacteroidia;Bacteroidales;Tannerellaceae;Parabacteroides;Parabacteroides_goldsteinii
k127_5998370	11487	db_customA	S	CP064353.1	99.713	3	11487	0	21027	11487	CP064353.1 Parabacteroides goldsteinii strain MTS01 chromosome; complete genome	99.9826	1	Bacteria;Bacteroidota;Bacteroidia;Bacteroidales;Tannerellaceae;Parabacteroides;Parabacteroides_goldsteinii
k127_6005928	171718	db_customA	S	CP064353.1	99.961	74134	171610	0	179800	171718	CP064353.1 Parabacteroides goldsteinii strain MTS01 chromosome; complete genome	56.7663	1	Bacteria;Bacteroidota;Bacteroidia;Bacteroidales;Tannerellaceae;Parabacteroides;Parabacteroides_goldsteinii
k127_6027566	16713	db_customA	S	CP064353.1	99.922	1	16713	0	30792	16713	CP064353.1 Parabacteroides goldsteinii strain MTS01 chromosome; complete genome	100	1	Bacteria;Bacteroidota;Bacteroidia;Bacteroidales;Tannerellaceae;Parabacteroides;Parabacteroides_goldsteinii
k127_6034657	5350	db_customA	S	CP064353.1	99.01	5149	5350	3.36e-96	361	5350	CP064353.1 Parabacteroides goldsteinii strain MTS01 chromosome; complete genome	3.7757	1	Bacteria;Bacteroidota;Bacteroidia;Bacteroidales;Tannerellaceae;Parabacteroides;Parabacteroides_goldsteinii
k127_6037593	764	db_customA	S	CP064353.1	97.178	1	567	0	959	764	CP064353.1 Parabacteroides goldsteinii strain MTS01 chromosome; complete genome	74.2147	1	Bacteria;Bacteroidota;Bacteroidia;Bacteroidales;Tannerellaceae;Parabacteroides;Parabacteroides_goldsteinii
k127_6160526	15695	db_customA	S	CP064353.1	99.796	1	15695	0	28807	15695	CP064353.1 Parabacteroides goldsteinii strain MTS01 chromosome; complete genome	100	1	Bacteria;Bacteroidota;Bacteroidia;Bacteroidales;Tannerellaceae;Parabacteroides;Parabacteroides_goldsteinii
k127_6166406	1324	db_customA	S	CP064353.1	98.716	1	1324	0	2351	1324	CP064353.1 Parabacteroides goldsteinii strain MTS01 chromosome; complete genome	100	1	Bacteria;Bacteroidota;Bacteroidia;Bacteroidales;Tannerellaceae;Parabacteroides;Parabacteroides_goldsteinii
k127_6191335	4918	db_customA	S	CP064353.1	99.041	18	4918	0	8791	4918	CP064353.1 Parabacteroides goldsteinii strain MTS01 chromosome; complete genome	99.6543	1	Bacteria;Bacteroidota;Bacteroidia;Bacteroidales;Tannerellaceae;Parabacteroides;Parabacteroides_goldsteinii
k127_6202775	1051	db_customA	S	CP064353.1	97.343	337	1051	0	1216	1051	CP064353.1 Parabacteroides goldsteinii strain MTS01 chromosome; complete genome	68.0304	1	Bacteria;Bacteroidota;Bacteroidia;Bacteroidales;Tannerellaceae;Parabacteroides;Parabacteroides_goldsteinii
k127_6229071	9379	db_customA	S	CP064353.1	99.552	1	9379	0	17088	9379	CP064353.1 Parabacteroides goldsteinii strain MTS01 chromosome; complete genome	100	1	Bacteria;Bacteroidota;Bacteroidia;Bacteroidales;Tannerellaceae;Parabacteroides;Parabacteroides_goldsteinii
k127_637093	36647	db_customA	S	CP064353.1	99.97	1	36647	0	67612	36647	CP064353.1 Parabacteroides goldsteinii strain MTS01 chromosome; complete genome	100	1	Bacteria;Bacteroidota;Bacteroidia;Bacteroidales;Tannerellaceae;Parabacteroides;Parabacteroides_goldsteinii
k127_6384344	3507	db_customA	S	CP064353.1	99.601	1	3507	0	6399	3507	CP064353.1 Parabacteroides goldsteinii strain MTS01 chromosome; complete genome	100	1	Bacteria;Bacteroidota;Bacteroidia;Bacteroidales;Tannerellaceae;Parabacteroides;Parabacteroides_goldsteinii
k127_6411926	2569	db_customA	S	CP064353.1	98.94	1	2548	0	4554	2569	CP064353.1 Parabacteroides goldsteinii strain MTS01 chromosome; complete genome	99.1826	1	Bacteria;Bacteroidota;Bacteroidia;Bacteroidales;Tannerellaceae;Parabacteroides;Parabacteroides_goldsteinii
k127_6417849	31878	db_customA	S	CP064353.1	99.922	1	31878	0	58739	31878	CP064353.1 Parabacteroides goldsteinii strain MTS01 chromosome; complete genome	100	1	Bacteria;Bacteroidota;Bacteroidia;Bacteroidales;Tannerellaceae;Parabacteroides;Parabacteroides_goldsteinii
k127_6538753	4802	db_customA	S	CP064353.1	99.229	1	4802	0	8663	4802	CP064353.1 Parabacteroides goldsteinii strain MTS01 chromosome; complete genome	100	1	Bacteria;Bacteroidota;Bacteroidia;Bacteroidales;Tannerellaceae;Parabacteroides;Parabacteroides_goldsteinii
k127_6609805	44522	db_customA	S	CP064353.1	99.944	14281	44522	0	55757	44522	CP064353.1 Parabacteroides goldsteinii strain MTS01 chromosome; complete genome	67.9372	1	Bacteria;Bacteroidota;Bacteroidia;Bacteroidales;Tannerellaceae;Parabacteroides;Parabacteroides_goldsteinii
k127_6613356	3813	db_customA	S	CP064353.1	98.336	88	3813	0	6538	3813	CP064353.1 Parabacteroides goldsteinii strain MTS01 chromosome; complete genome	97.7446	1	Bacteria;Bacteroidota;Bacteroidia;Bacteroidales;Tannerellaceae;Parabacteroides;Parabacteroides_goldsteinii
k127_6631632	69136	db_customA	S	CP064353.1	99.828	29029	69136	0	73684	69136	CP064353.1 Parabacteroides goldsteinii strain MTS01 chromosome; complete genome	58.0161	1	Bacteria;Bacteroidota;Bacteroidia;Bacteroidales;Tannerellaceae;Parabacteroides;Parabacteroides_goldsteinii
k127_6636386	52467	db_customA	S	CP064353.1	99.968	1	52467	0	96796	52467	CP064353.1 Parabacteroides goldsteinii strain MTS01 chromosome; complete genome	100	1	Bacteria;Bacteroidota;Bacteroidia;Bacteroidales;Tannerellaceae;Parabacteroides;Parabacteroides_goldsteinii
k127_6704918	666	nt	S	CP064353.1	97.147	1	666	0	1125	666	CP064353.1 Parabacteroides goldsteinii strain MTS01 chromosome; complete genome	100	1	Bacteria;Bacteroidota;Bacteroidia;Bacteroidales;Tannerellaceae;Parabacteroides;Parabacteroides_goldsteinii
k127_6745088	3531	db_customA	S	CP064353.1	98.473	39	3312	0	5770	3531	CP064353.1 Parabacteroides goldsteinii strain MTS01 chromosome; complete genome	92.7216	1	Bacteria;Bacteroidota;Bacteroidia;Bacteroidales;Tannerellaceae;Parabacteroides;Parabacteroides_goldsteinii
k127_6778611	37534	db_customA	S	CP064353.1	99.939	1	37534	0	69184	37534	CP064353.1 Parabacteroides goldsteinii strain MTS01 chromosome; complete genome	100	1	Bacteria;Bacteroidota;Bacteroidia;Bacteroidales;Tannerellaceae;Parabacteroides;Parabacteroides_goldsteinii
k127_6786140	3688	db_customA	S	CP064353.1	99.458	1	3688	0	6700	3688	CP064353.1 Parabacteroides goldsteinii strain MTS01 chromosome; complete genome	100	1	Bacteria;Bacteroidota;Bacteroidia;Bacteroidales;Tannerellaceae;Parabacteroides;Parabacteroides_goldsteinii
k127_6908355	12689	db_customA	S	CP064353.1	98.894	219	12689	0	22260	12689	CP064353.1 Parabacteroides goldsteinii strain MTS01 chromosome; complete genome	98.2899	1	Bacteria;Bacteroidota;Bacteroidia;Bacteroidales;Tannerellaceae;Parabacteroides;Parabacteroides_goldsteinii
k127_6908973	9970	db_customA	S	CP064353.1	99.739	1	9970	0	18268	9970	CP064353.1 Parabacteroides goldsteinii strain MTS01 chromosome; complete genome	100	1	Bacteria;Bacteroidota;Bacteroidia;Bacteroidales;Tannerellaceae;Parabacteroides;Parabacteroides_goldsteinii
k127_6924871	31534	db_customA	S	CP064353.1	99.827	1	12149	0	22301	31534	CP064353.1 Parabacteroides goldsteinii strain MTS01 chromosome; complete genome	38.5267	1	Bacteria;Bacteroidota;Bacteroidia;Bacteroidales;Tannerellaceae;Parabacteroides;Parabacteroides_goldsteinii
k127_6973472	33397	db_customA	S	CP064353.1	99.832	39	33298	0	61110	33397	CP064353.1 Parabacteroides goldsteinii strain MTS01 chromosome; complete genome	99.5898	1	Bacteria;Bacteroidota;Bacteroidia;Bacteroidales;Tannerellaceae;Parabacteroides;Parabacteroides_goldsteinii
k127_698552	42892	db_customA	S	CP064353.1	99.918	1	42892	0	79010	42892	CP064353.1 Parabacteroides goldsteinii strain MTS01 chromosome; complete genome	100	1	Bacteria;Bacteroidota;Bacteroidia;Bacteroidales;Tannerellaceae;Parabacteroides;Parabacteroides_goldsteinii
k127_701033	546	db_customA	S	CP064353.1	97.985	1	546	0	948	546	CP064353.1 Parabacteroides goldsteinii strain MTS01 chromosome; complete genome	100	1	Bacteria;Bacteroidota;Bacteroidia;Bacteroidales;Tannerellaceae;Parabacteroides;Parabacteroides_goldsteinii
k127_7029940	51744	db_customA	S	CP064353.1	99.981	1	41604	0	76784	51744	CP064353.1 Parabacteroides goldsteinii strain MTS01 chromosome; complete genome	80.4055	1	Bacteria;Bacteroidota;Bacteroidia;Bacteroidales;Tannerellaceae;Parabacteroides;Parabacteroides_goldsteinii
k127_7055503	40771	db_customA	S	CP064353.1	99.912	1	40771	0	75091	40771	CP064353.1 Parabacteroides goldsteinii strain MTS01 chromosome; complete genome	100	1	Bacteria;Bacteroidota;Bacteroidia;Bacteroidales;Tannerellaceae;Parabacteroides;Parabacteroides_goldsteinii
k127_7079886	68603	db_customA	S	CP064353.1	99.915	1	68602	0	126400	68603	CP064353.1 Parabacteroides goldsteinii strain MTS01 chromosome; complete genome	100	1	Bacteria;Bacteroidota;Bacteroidia;Bacteroidales;Tannerellaceae;Parabacteroides;Parabacteroides_goldsteinii
k127_710416	8575	db_customA	S	CP064353.1	99.557	2	8123	0	14800	8575	CP064353.1 Parabacteroides goldsteinii strain MTS01 chromosome; complete genome	94.7172	1	Bacteria;Bacteroidota;Bacteroidia;Bacteroidales;Tannerellaceae;Parabacteroides;Parabacteroides_goldsteinii
k127_7105642	298	db_customA	S	CP064353.1	100	1	298	9.41e-155	551	298	CP064353.1 Parabacteroides goldsteinii strain MTS01 chromosome; complete genome	100	1	Bacteria;Bacteroidota;Bacteroidia;Bacteroidales;Tannerellaceae;Parabacteroides;Parabacteroides_goldsteinii
k127_7110469	31527	db_customA	S	CP064353.1	99.766	1	31203	0	57217	31527	CP064353.1 Parabacteroides goldsteinii strain MTS01 chromosome; complete genome	98.9723	1	Bacteria;Bacteroidota;Bacteroidia;Bacteroidales;Tannerellaceae;Parabacteroides;Parabacteroides_goldsteinii
k127_7110859	409	db_customA	S	CP064353.1	100	1	409	0	756	409	CP064353.1 Parabacteroides goldsteinii strain MTS01 chromosome; complete genome	100	1	Bacteria;Bacteroidota;Bacteroidia;Bacteroidales;Tannerellaceae;Parabacteroides;Parabacteroides_goldsteinii
k127_7115357	74646	db_customA	S	CP064353.1	99.97	50	74452	0	137300	74646	CP064353.1 Parabacteroides goldsteinii strain MTS01 chromosome; complete genome	99.6745	1	Bacteria;Bacteroidota;Bacteroidia;Bacteroidales;Tannerellaceae;Parabacteroides;Parabacteroides_goldsteinii
k127_7138882	703	nt	S	CP064353.1	97.733	1	397	0	684	703	CP064353.1 Parabacteroides goldsteinii strain MTS01 chromosome; complete genome	56.4723	1	Bacteria;Bacteroidota;Bacteroidia;Bacteroidales;Tannerellaceae;Parabacteroides;Parabacteroides_goldsteinii
k127_719664	28613	db_customA	S	CP064353.1	99.913	1	28613	0	52700	28613	CP064353.1 Parabacteroides goldsteinii strain MTS01 chromosome; complete genome	100	1	Bacteria;Bacteroidota;Bacteroidia;Bacteroidales;Tannerellaceae;Parabacteroides;Parabacteroides_goldsteinii
k127_739206	214	db_customA	S	CP064353.1	100	1	214	3.22e-108	396	214	CP064353.1 Parabacteroides goldsteinii strain MTS01 chromosome; complete genome	100	1	Bacteria;Bacteroidota;Bacteroidia;Bacteroidales;Tannerellaceae;Parabacteroides;Parabacteroides_goldsteinii
k127_752941	56617	db_customA	S	CP064353.1	99.917	1	56617	0	104300	56617	CP064353.1 Parabacteroides goldsteinii strain MTS01 chromosome; complete genome	100	1	Bacteria;Bacteroidota;Bacteroidia;Bacteroidales;Tannerellaceae;Parabacteroides;Parabacteroides_goldsteinii
k127_760152	15866	db_customA	S	CP064353.1	99.711	301	15866	0	28496	15866	CP064353.1 Parabacteroides goldsteinii strain MTS01 chromosome; complete genome	98.1155	1	Bacteria;Bacteroidota;Bacteroidia;Bacteroidales;Tannerellaceae;Parabacteroides;Parabacteroides_goldsteinii
k127_781311	17937	db_customA	S	CP064353.1	99.961	1	17937	0	33085	17937	CP064353.1 Parabacteroides goldsteinii strain MTS01 chromosome; complete genome	100	1	Bacteria;Bacteroidota;Bacteroidia;Bacteroidales;Tannerellaceae;Parabacteroides;Parabacteroides_goldsteinii
k127_809387	518	db_customA	S	CP064353.1	99.228	1	518	0	935	518	CP064353.1 Parabacteroides goldsteinii strain MTS01 chromosome; complete genome	100	1	Bacteria;Bacteroidota;Bacteroidia;Bacteroidales;Tannerellaceae;Parabacteroides;Parabacteroides_goldsteinii
k127_827287	28488	db_customA	S	CP064353.1	99.979	1	28488	0	52571	28488	CP064353.1 Parabacteroides goldsteinii strain MTS01 chromosome; complete genome	100	1	Bacteria;Bacteroidota;Bacteroidia;Bacteroidales;Tannerellaceae;Parabacteroides;Parabacteroides_goldsteinii
k127_844114	31238	db_customA	S	CP064353.1	99.859	1	31236	0	57439	31238	CP064353.1 Parabacteroides goldsteinii strain MTS01 chromosome; complete genome	99.9968	1	Bacteria;Bacteroidota;Bacteroidia;Bacteroidales;Tannerellaceae;Parabacteroides;Parabacteroides_goldsteinii
k127_905275	2037	db_customA	S	CP064353.1	98.38	1	2037	0	3579	2037	CP064353.1 Parabacteroides goldsteinii strain MTS01 chromosome; complete genome	100	1	Bacteria;Bacteroidota;Bacteroidia;Bacteroidales;Tannerellaceae;Parabacteroides;Parabacteroides_goldsteinii
k127_913615	64429	db_customA	S	CP064353.1	99.938	1	64428	0	118800	64429	CP064353.1 Parabacteroides goldsteinii strain MTS01 chromosome; complete genome	100	1	Bacteria;Bacteroidota;Bacteroidia;Bacteroidales;Tannerellaceae;Parabacteroides;Parabacteroides_goldsteinii
k127_916507	40933	db_customA	S	CP064353.1	99.895	1	40755	0	75034	40933	CP064353.1 Parabacteroides goldsteinii strain MTS01 chromosome; complete genome	99.6042	1	Bacteria;Bacteroidota;Bacteroidia;Bacteroidales;Tannerellaceae;Parabacteroides;Parabacteroides_goldsteinii
k127_921440	33832	db_customA	S	CP064353.1	99.679	2657	33832	0	57016	33832	CP064353.1 Parabacteroides goldsteinii strain MTS01 chromosome; complete genome	92.1613	1	Bacteria;Bacteroidota;Bacteroidia;Bacteroidales;Tannerellaceae;Parabacteroides;Parabacteroides_goldsteinii
k127_921936	44477	db_customA	S	CP064353.1	99.932	100	44477	0	81785	44477	CP064353.1 Parabacteroides goldsteinii strain MTS01 chromosome; complete genome	99.7774	1	Bacteria;Bacteroidota;Bacteroidia;Bacteroidales;Tannerellaceae;Parabacteroides;Parabacteroides_goldsteinii
k127_92447	15159	db_customA	S	CP064353.1	99.967	1	15159	0	27966	15159	CP064353.1 Parabacteroides goldsteinii strain MTS01 chromosome; complete genome	100	1	Bacteria;Bacteroidota;Bacteroidia;Bacteroidales;Tannerellaceae;Parabacteroides;Parabacteroides_goldsteinii
k127_999600	716	db_customA	S	CP064353.1	98.682	1	683	0	1212	716	CP064353.1 Parabacteroides goldsteinii strain MTS01 chromosome; complete genome	95.3911	1	Bacteria;Bacteroidota;Bacteroidia;Bacteroidales;Tannerellaceae;Parabacteroides;Parabacteroides_goldsteinii
k127_1033	9763	db_customA	S	CP097562.1	99.908	1	9733	0	17922	9763	CP097562.1 Mucispirillum schaedleri ASF457 chromosome; complete genome	99.6927	1	Bacteria;Deferribacteres;Deferribacteres;Deferribacterales;Mucispirillaceae;Mucispirillum;Mucispirillum_schaedleri
k127_1133437	2132	db_customA	S	CP097562.1	99.812	1	2132	0	3916	2132	CP097562.1 Mucispirillum schaedleri ASF457 chromosome; complete genome	100	1	Bacteria;Deferribacteres;Deferribacteres;Deferribacterales;Mucispirillaceae;Mucispirillum;Mucispirillum_schaedleri
k127_1134260	48824	db_customA	S	CP097562.1	99.967	3	48824	0	90069	48824	CP097562.1 Mucispirillum schaedleri ASF457 chromosome; complete genome	99.9959	1	Bacteria;Deferribacteres;Deferribacteres;Deferribacterales;Mucispirillaceae;Mucispirillum;Mucispirillum_schaedleri
k127_1164536	38313	db_customA	S	CP097562.1	99.992	125	38313	0	70506	38313	CP097562.1 Mucispirillum schaedleri ASF457 chromosome; complete genome	99.6764	1	Bacteria;Deferribacteres;Deferribacteres;Deferribacterales;Mucispirillaceae;Mucispirillum;Mucispirillum_schaedleri
k127_1236602	112062	db_customA	S	CP097562.1	99.984	38289	112062	0	136200	112062	CP097562.1 Mucispirillum schaedleri ASF457 chromosome; complete genome	65.835	1	Bacteria;Deferribacteres;Deferribacteres;Deferribacterales;Mucispirillaceae;Mucispirillum;Mucispirillum_schaedleri
k127_1281452	31575	db_customA	S	CP097562.1	99.94	1	31575	0	58203	31575	CP097562.1 Mucispirillum schaedleri ASF457 chromosome; complete genome	100	1	Bacteria;Deferribacteres;Deferribacteres;Deferribacterales;Mucispirillaceae;Mucispirillum;Mucispirillum_schaedleri
k127_1315743	510	db_customA	S	CP097562.1	97.451	1	510	0	870	510	CP097562.1 Mucispirillum schaedleri ASF457 chromosome; complete genome	100	1	Bacteria;Deferribacteres;Deferribacteres;Deferribacterales;Mucispirillaceae;Mucispirillum;Mucispirillum_schaedleri
k127_1382464	4922	db_customA	S	CP097562.1	99.79	120	4890	0	8756	4922	CP097562.1 Mucispirillum schaedleri ASF457 chromosome; complete genome	96.9525	1	Bacteria;Deferribacteres;Deferribacteres;Deferribacterales;Mucispirillaceae;Mucispirillum;Mucispirillum_schaedleri
k127_1409593	447	db_customA	S	CP097562.1	97.539	1	447	0	765	447	CP097562.1 Mucispirillum schaedleri ASF457 chromosome; complete genome	100	1	Bacteria;Deferribacteres;Deferribacteres;Deferribacterales;Mucispirillaceae;Mucispirillum;Mucispirillum_schaedleri
k127_1416319	30195	db_customA	S	CP097562.1	99.974	1	30195	0	55716	30195	CP097562.1 Mucispirillum schaedleri ASF457 chromosome; complete genome	100	1	Bacteria;Deferribacteres;Deferribacteres;Deferribacterales;Mucispirillaceae;Mucispirillum;Mucispirillum_schaedleri
k127_1429143	605	db_customA	S	CP097562.1	98.204	105	605	0	876	605	CP097562.1 Mucispirillum schaedleri ASF457 chromosome; complete genome	82.8099	1	Bacteria;Deferribacteres;Deferribacteres;Deferribacterales;Mucispirillaceae;Mucispirillum;Mucispirillum_schaedleri
k127_1429324	2740	db_customA	S	CP097562.1	100	1	2740	0	5060	2740	CP097562.1 Mucispirillum schaedleri ASF457 chromosome; complete genome	100	1	Bacteria;Deferribacteres;Deferribacteres;Deferribacterales;Mucispirillaceae;Mucispirillum;Mucispirillum_schaedleri
k127_1437422	27922	db_customA	S	CP097562.1	99.925	94	27922	0	51275	27922	CP097562.1 Mucispirillum schaedleri ASF457 chromosome; complete genome	99.6669	1	Bacteria;Deferribacteres;Deferribacteres;Deferribacterales;Mucispirillaceae;Mucispirillum;Mucispirillum_schaedleri
k127_1459480	1032	db_customA	S	CP097562.1	100	1	1032	0	1906	1032	CP097562.1 Mucispirillum schaedleri ASF457 chromosome; complete genome	100	1	Bacteria;Deferribacteres;Deferribacteres;Deferribacterales;Mucispirillaceae;Mucispirillum;Mucispirillum_schaedleri
k127_1481125	2715	db_customA	S	CP097562.1	100	1	2592	0	4787	2715	CP097562.1 Mucispirillum schaedleri ASF457 chromosome; complete genome	95.4696	1	Bacteria;Deferribacteres;Deferribacteres;Deferribacterales;Mucispirillaceae;Mucispirillum;Mucispirillum_schaedleri
k127_1494268	2802	db_customA	S	CP097562.1	100	1	2802	0	5175	2802	CP097562.1 Mucispirillum schaedleri ASF457 chromosome; complete genome	100	1	Bacteria;Deferribacteres;Deferribacteres;Deferribacterales;Mucispirillaceae;Mucispirillum;Mucispirillum_schaedleri
k127_1619045	29975	db_customA	S	CP097562.1	99.848	506	21522	0	38636	29975	CP097562.1 Mucispirillum schaedleri ASF457 chromosome; complete genome	70.1251	1	Bacteria;Deferribacteres;Deferribacteres;Deferribacterales;Mucispirillaceae;Mucispirillum;Mucispirillum_schaedleri
k127_179882	340	db_customA	S	CP097562.1	100	1	340	4.88e-178	628	340	CP097562.1 Mucispirillum schaedleri ASF457 chromosome; complete genome	100	1	Bacteria;Deferribacteres;Deferribacteres;Deferribacterales;Mucispirillaceae;Mucispirillum;Mucispirillum_schaedleri
k127_1813849	15688	db_customA	S	CP097562.1	99.974	194	15688	0	28592	15688	CP097562.1 Mucispirillum schaedleri ASF457 chromosome; complete genome	98.7698	1	Bacteria;Deferribacteres;Deferribacteres;Deferribacterales;Mucispirillaceae;Mucispirillum;Mucispirillum_schaedleri
k127_1819393	58866	db_customA	S	CP097562.1	99.99	125	58866	0	108400	58866	CP097562.1 Mucispirillum schaedleri ASF457 chromosome; complete genome	99.7894	1	Bacteria;Deferribacteres;Deferribacteres;Deferribacterales;Mucispirillaceae;Mucispirillum;Mucispirillum_schaedleri
k127_1840541	452	db_customA	S	CP097562.1	100	1	452	0	835	452	CP097562.1 Mucispirillum schaedleri ASF457 chromosome; complete genome	100	1	Bacteria;Deferribacteres;Deferribacteres;Deferribacterales;Mucispirillaceae;Mucispirillum;Mucispirillum_schaedleri
k127_1911815	18776	db_customA	S	CP097562.1	99.936	1	18776	0	34607	18776	CP097562.1 Mucispirillum schaedleri ASF457 chromosome; complete genome	100	1	Bacteria;Deferribacteres;Deferribacteres;Deferribacterales;Mucispirillaceae;Mucispirillum;Mucispirillum_schaedleri
k127_1916055	2089	db_customA	S	CP097562.1	100	1	2089	0	3858	2089	CP097562.1 Mucispirillum schaedleri ASF457 chromosome; complete genome	100	1	Bacteria;Deferribacteres;Deferribacteres;Deferribacterales;Mucispirillaceae;Mucispirillum;Mucispirillum_schaedleri
k127_1942252	24102	db_customA	S	CP097562.1	100	126	23652	0	43447	24102	CP097562.1 Mucispirillum schaedleri ASF457 chromosome; complete genome	97.6143	1	Bacteria;Deferribacteres;Deferribacteres;Deferribacterales;Mucispirillaceae;Mucispirillum;Mucispirillum_schaedleri
k127_2055556	5327	db_customA	S	CP097562.1	99.925	1	5327	0	9816	5327	CP097562.1 Mucispirillum schaedleri ASF457 chromosome; complete genome	100	1	Bacteria;Deferribacteres;Deferribacteres;Deferribacterales;Mucispirillaceae;Mucispirillum;Mucispirillum_schaedleri
k127_2068860	3491	db_customA	S	CP097562.1	99.513	1	3491	0	6353	3491	CP097562.1 Mucispirillum schaedleri ASF457 chromosome; complete genome	100	1	Bacteria;Deferribacteres;Deferribacteres;Deferribacterales;Mucispirillaceae;Mucispirillum;Mucispirillum_schaedleri
k127_2120227	355	db_customA	S	CP097562.1	100	1	355	0	656	355	CP097562.1 Mucispirillum schaedleri ASF457 chromosome; complete genome	100	1	Bacteria;Deferribacteres;Deferribacteres;Deferribacterales;Mucispirillaceae;Mucispirillum;Mucispirillum_schaedleri
k127_2134671	13497	db_customA	S	CP097562.1	99.917	175	13497	0	24543	13497	CP097562.1 Mucispirillum schaedleri ASF457 chromosome; complete genome	98.7108	1	Bacteria;Deferribacteres;Deferribacteres;Deferribacterales;Mucispirillaceae;Mucispirillum;Mucispirillum_schaedleri
k127_2270775	353	db_customA	S	CP097562.1	100	1	353	0	652	353	CP097562.1 Mucispirillum schaedleri ASF457 chromosome; complete genome	100	1	Bacteria;Deferribacteres;Deferribacteres;Deferribacterales;Mucispirillaceae;Mucispirillum;Mucispirillum_schaedleri
k127_2290986	21596	db_customA	S	CP097562.1	99.972	1	21476	0	39626	21596	CP097562.1 Mucispirillum schaedleri ASF457 chromosome; complete genome	99.4443	1	Bacteria;Deferribacteres;Deferribacteres;Deferribacterales;Mucispirillaceae;Mucispirillum;Mucispirillum_schaedleri
k127_2299955	42826	db_customA	S	CP097562.1	99.967	1	42532	0	78465	42826	CP097562.1 Mucispirillum schaedleri ASF457 chromosome; complete genome	99.3182	1	Bacteria;Deferribacteres;Deferribacteres;Deferribacterales;Mucispirillaceae;Mucispirillum;Mucispirillum_schaedleri
k127_230803	480	db_customA	S	CP097562.1	99.792	1	480	0	881	480	CP097562.1 Mucispirillum schaedleri ASF457 chromosome; complete genome	100	1	Bacteria;Deferribacteres;Deferribacteres;Deferribacterales;Mucispirillaceae;Mucispirillum;Mucispirillum_schaedleri
k127_2316590	12408	db_customA	S	CP097562.1	100	1	12408	0	22914	12408	CP097562.1 Mucispirillum schaedleri ASF457 chromosome; complete genome	100	1	Bacteria;Deferribacteres;Deferribacteres;Deferribacterales;Mucispirillaceae;Mucispirillum;Mucispirillum_schaedleri
k127_2323264	5868	db_customA	S	CP097562.1	99.489	1	5868	0	10671	5868	CP097562.1 Mucispirillum schaedleri ASF457 chromosome; complete genome	100	1	Bacteria;Deferribacteres;Deferribacteres;Deferribacterales;Mucispirillaceae;Mucispirillum;Mucispirillum_schaedleri
k127_233372	1945	db_customA	S	CP097562.1	99.743	1	1945	0	3565	1945	CP097562.1 Mucispirillum schaedleri ASF457 chromosome; complete genome	100	1	Bacteria;Deferribacteres;Deferribacteres;Deferribacterales;Mucispirillaceae;Mucispirillum;Mucispirillum_schaedleri
k127_241657	8043	db_customA	S	CP097562.1	100	1	8043	0	14853	8043	CP097562.1 Mucispirillum schaedleri ASF457 chromosome; complete genome	100	1	Bacteria;Deferribacteres;Deferribacteres;Deferribacterales;Mucispirillaceae;Mucispirillum;Mucispirillum_schaedleri
k127_246545	9783	db_customA	S	CP097562.1	99.99	1	9783	0	18061	9783	CP097562.1 Mucispirillum schaedleri ASF457 chromosome; complete genome	100	1	Bacteria;Deferribacteres;Deferribacteres;Deferribacterales;Mucispirillaceae;Mucispirillum;Mucispirillum_schaedleri
k127_246551	1075	db_customA	S	CP097562.1	100	1	1075	0	1986	1075	CP097562.1 Mucispirillum schaedleri ASF457 chromosome; complete genome	100	1	Bacteria;Deferribacteres;Deferribacteres;Deferribacterales;Mucispirillaceae;Mucispirillum;Mucispirillum_schaedleri
k127_2558478	61154	db_customA	S	CP097562.1	99.966	1	61154	0	112800	61154	CP097562.1 Mucispirillum schaedleri ASF457 chromosome; complete genome	100	1	Bacteria;Deferribacteres;Deferribacteres;Deferribacterales;Mucispirillaceae;Mucispirillum;Mucispirillum_schaedleri
k127_2584628	26025	db_customA	S	CP097562.1	99.961	1	25531	0	47092	26025	CP097562.1 Mucispirillum schaedleri ASF457 chromosome; complete genome	98.1018	1	Bacteria;Deferribacteres;Deferribacteres;Deferribacterales;Mucispirillaceae;Mucispirillum;Mucispirillum_schaedleri
k127_2589724	2571	db_customA	S	CP097562.1	99.922	1	2571	0	4737	2571	CP097562.1 Mucispirillum schaedleri ASF457 chromosome; complete genome	100	1	Bacteria;Deferribacteres;Deferribacteres;Deferribacterales;Mucispirillaceae;Mucispirillum;Mucispirillum_schaedleri
k127_2654755	13382	db_customA	S	CP097562.1	99.993	1	13382	0	24707	13382	CP097562.1 Mucispirillum schaedleri ASF457 chromosome; complete genome	100	1	Bacteria;Deferribacteres;Deferribacteres;Deferribacterales;Mucispirillaceae;Mucispirillum;Mucispirillum_schaedleri
k127_2674254	1702	db_customA	S	CP097562.1	97.305	1	1702	0	2891	1702	CP097562.1 Mucispirillum schaedleri ASF457 chromosome; complete genome	100	1	Bacteria;Deferribacteres;Deferribacteres;Deferribacterales;Mucispirillaceae;Mucispirillum;Mucispirillum_schaedleri
k127_2701217	1937	db_customA	S	CP097562.1	98.717	535	1937	0	2490	1937	CP097562.1 Mucispirillum schaedleri ASF457 chromosome; complete genome	72.4316	2	Bacteria;Deferribacteres;Deferribacteres;Deferribacterales;Mucispirillaceae;Mucispirillum;Mucispirillum_schaedleri
k127_2744236	639	db_customA	S	CP097562.1	100	1	639	0	1181	639	CP097562.1 Mucispirillum schaedleri ASF457 chromosome; complete genome	100	1	Bacteria;Deferribacteres;Deferribacteres;Deferribacterales;Mucispirillaceae;Mucispirillum;Mucispirillum_schaedleri
k127_2764767	43776	db_customA	S	CP097562.1	99.906	52	43763	0	80492	43776	CP097562.1 Mucispirillum schaedleri ASF457 chromosome; complete genome	99.8538	1	Bacteria;Deferribacteres;Deferribacteres;Deferribacterales;Mucispirillaceae;Mucispirillum;Mucispirillum_schaedleri
k127_277550	51497	db_customA	S	CP097562.1	99.945	303	51384	0	94176	51497	CP097562.1 Mucispirillum schaedleri ASF457 chromosome; complete genome	99.1961	1	Bacteria;Deferribacteres;Deferribacteres;Deferribacterales;Mucispirillaceae;Mucispirillum;Mucispirillum_schaedleri
k127_2830708	72904	db_customA	S	CP097562.1	99.996	1	72779	0	134400	72904	CP097562.1 Mucispirillum schaedleri ASF457 chromosome; complete genome	99.8285	1	Bacteria;Deferribacteres;Deferribacteres;Deferribacterales;Mucispirillaceae;Mucispirillum;Mucispirillum_schaedleri
k127_2833013	3548	db_customA	S	CP097562.1	100	1	3423	0	6322	3548	CP097562.1 Mucispirillum schaedleri ASF457 chromosome; complete genome	96.4769	1	Bacteria;Deferribacteres;Deferribacteres;Deferribacterales;Mucispirillaceae;Mucispirillum;Mucispirillum_schaedleri
k127_2833060	1446	db_customA	S	CP097562.1	98.796	1	1329	0	2366	1446	CP097562.1 Mucispirillum schaedleri ASF457 chromosome; complete genome	91.9087	1	Bacteria;Deferribacteres;Deferribacteres;Deferribacterales;Mucispirillaceae;Mucispirillum;Mucispirillum_schaedleri
k127_2874007	2643	db_customA	S	CP097562.1	100	1	2643	0	4881	2643	CP097562.1 Mucispirillum schaedleri ASF457 chromosome; complete genome	100	1	Bacteria;Deferribacteres;Deferribacteres;Deferribacterales;Mucispirillaceae;Mucispirillum;Mucispirillum_schaedleri
k127_2956932	512	db_customA	S	CP097562.1	100	1	512	0	946	512	CP097562.1 Mucispirillum schaedleri ASF457 chromosome; complete genome	100	1	Bacteria;Deferribacteres;Deferribacteres;Deferribacterales;Mucispirillaceae;Mucispirillum;Mucispirillum_schaedleri
k127_2957157	20021	db_customA	S	CP097562.1	99.96	74	20021	0	36793	20021	CP097562.1 Mucispirillum schaedleri ASF457 chromosome; complete genome	99.6354	1	Bacteria;Deferribacteres;Deferribacteres;Deferribacterales;Mucispirillaceae;Mucispirillum;Mucispirillum_schaedleri
k127_2970590	7861	db_customA	S	CP097562.1	100	255	7861	0	14048	7861	CP097562.1 Mucispirillum schaedleri ASF457 chromosome; complete genome	96.7689	1	Bacteria;Deferribacteres;Deferribacteres;Deferribacterales;Mucispirillaceae;Mucispirillum;Mucispirillum_schaedleri
k127_2994609	1674	db_customA	S	CP097562.1	99.104	1	1674	0	3009	1674	CP097562.1 Mucispirillum schaedleri ASF457 chromosome; complete genome	100	1	Bacteria;Deferribacteres;Deferribacteres;Deferribacterales;Mucispirillaceae;Mucispirillum;Mucispirillum_schaedleri
k127_3045300	3340	db_customA	S	CP097562.1	98.648	161	3340	0	5635	3340	CP097562.1 Mucispirillum schaedleri ASF457 chromosome; complete genome	95.2395	1	Bacteria;Deferribacteres;Deferribacteres;Deferribacterales;Mucispirillaceae;Mucispirillum;Mucispirillum_schaedleri
k127_3047117	14657	db_customA	S	CP097562.1	99.966	1	14531	0	26807	14657	CP097562.1 Mucispirillum schaedleri ASF457 chromosome; complete genome	99.1403	1	Bacteria;Deferribacteres;Deferribacteres;Deferribacterales;Mucispirillaceae;Mucispirillum;Mucispirillum_schaedleri
k127_3047364	6493	db_customA	S	CP097562.1	100	1	6493	0	11991	6493	CP097562.1 Mucispirillum schaedleri ASF457 chromosome; complete genome	100	1	Bacteria;Deferribacteres;Deferribacteres;Deferribacterales;Mucispirillaceae;Mucispirillum;Mucispirillum_schaedleri
k127_3054700	3136	db_customA	S	CP097562.1	99.681	1	3136	0	5736	3136	CP097562.1 Mucispirillum schaedleri ASF457 chromosome; complete genome	100	1	Bacteria;Deferribacteres;Deferribacteres;Deferribacterales;Mucispirillaceae;Mucispirillum;Mucispirillum_schaedleri
k127_3089068	31448	db_customA	S	CP097562.1	99.977	152	26730	0	49048	31448	CP097562.1 Mucispirillum schaedleri ASF457 chromosome; complete genome	84.5173	1	Bacteria;Deferribacteres;Deferribacteres;Deferribacterales;Mucispirillaceae;Mucispirillum;Mucispirillum_schaedleri
k127_3124326	1551	db_customA	S	CP097562.1	99.678	1	1551	0	2837	1551	CP097562.1 Mucispirillum schaedleri ASF457 chromosome; complete genome	100	1	Bacteria;Deferribacteres;Deferribacteres;Deferribacterales;Mucispirillaceae;Mucispirillum;Mucispirillum_schaedleri
k127_3144800	12592	db_customA	S	CP097562.1	99.759	1	12467	0	22857	12592	CP097562.1 Mucispirillum schaedleri ASF457 chromosome; complete genome	99.0073	1	Bacteria;Deferribacteres;Deferribacteres;Deferribacterales;Mucispirillaceae;Mucispirillum;Mucispirillum_schaedleri
k127_3217857	19950	db_customA	S	CP097562.1	100	1	19825	0	36610	19950	CP097562.1 Mucispirillum schaedleri ASF457 chromosome; complete genome	99.3734	1	Bacteria;Deferribacteres;Deferribacteres;Deferribacterales;Mucispirillaceae;Mucispirillum;Mucispirillum_schaedleri
k127_3280172	844	db_customA	S	CP097562.1	99.882	1	844	0	1554	844	CP097562.1 Mucispirillum schaedleri ASF457 chromosome; complete genome	100	1	Bacteria;Deferribacteres;Deferribacteres;Deferribacterales;Mucispirillaceae;Mucispirillum;Mucispirillum_schaedleri
k127_3373365	9191	db_customA	S	CP097562.1	99.989	1	9191	0	16968	9191	CP097562.1 Mucispirillum schaedleri ASF457 chromosome; complete genome	100	1	Bacteria;Deferribacteres;Deferribacteres;Deferribacterales;Mucispirillaceae;Mucispirillum;Mucispirillum_schaedleri
k127_3375701	5173	db_customA	S	CP097562.1	100	1	5173	0	9553	5173	CP097562.1 Mucispirillum schaedleri ASF457 chromosome; complete genome	100	1	Bacteria;Deferribacteres;Deferribacteres;Deferribacterales;Mucispirillaceae;Mucispirillum;Mucispirillum_schaedleri
k127_3400465	11775	db_customA	S	CP097562.1	99.941	1	11775	0	21706	11775	CP097562.1 Mucispirillum schaedleri ASF457 chromosome; complete genome	100	1	Bacteria;Deferribacteres;Deferribacteres;Deferribacterales;Mucispirillaceae;Mucispirillum;Mucispirillum_schaedleri
k127_3420499	5917	db_customA	S	CP097562.1	99.272	1	5908	0	10672	5917	CP097562.1 Mucispirillum schaedleri ASF457 chromosome; complete genome	99.8479	1	Bacteria;Deferribacteres;Deferribacteres;Deferribacterales;Mucispirillaceae;Mucispirillum;Mucispirillum_schaedleri
k127_3426960	1684	db_customA	S	CP097562.1	99.941	1	1684	0	3105	1684	CP097562.1 Mucispirillum schaedleri ASF457 chromosome; complete genome	100	1	Bacteria;Deferribacteres;Deferribacteres;Deferribacterales;Mucispirillaceae;Mucispirillum;Mucispirillum_schaedleri
k127_35209	29840	db_customA	S	CP097562.1	99.893	105	18757	0	34343	29840	CP097562.1 Mucispirillum schaedleri ASF457 chromosome; complete genome	62.5402	1	Bacteria;Deferribacteres;Deferribacteres;Deferribacterales;Mucispirillaceae;Mucispirillum;Mucispirillum_schaedleri
k127_3632212	52675	db_customA	S	CP097562.1	99.975	1	52675	0	97199	52675	CP097562.1 Mucispirillum schaedleri ASF457 chromosome; complete genome	100	1	Bacteria;Deferribacteres;Deferribacteres;Deferribacterales;Mucispirillaceae;Mucispirillum;Mucispirillum_schaedleri
k127_3691543	2472	db_customA	S	CP097562.1	100	1	2472	0	4566	2472	CP097562.1 Mucispirillum schaedleri ASF457 chromosome; complete genome	100	1	Bacteria;Deferribacteres;Deferribacteres;Deferribacterales;Mucispirillaceae;Mucispirillum;Mucispirillum_schaedleri
k127_3888654	60052	db_customA	S	CP097562.1	99.98	1	44618	0	82345	60052	CP097562.1 Mucispirillum schaedleri ASF457 chromosome; complete genome	74.2989	1	Bacteria;Deferribacteres;Deferribacteres;Deferribacterales;Mucispirillaceae;Mucispirillum;Mucispirillum_schaedleri
k127_3898922	1947	db_customA	S	CP097562.1	99.35	1	1845	0	3341	1947	CP097562.1 Mucispirillum schaedleri ASF457 chromosome; complete genome	94.7612	1	Bacteria;Deferribacteres;Deferribacteres;Deferribacterales;Mucispirillaceae;Mucispirillum;Mucispirillum_schaedleri
k127_3898927	19298	db_customA	S	CP097562.1	99.974	1	19298	0	35610	19298	CP097562.1 Mucispirillum schaedleri ASF457 chromosome; complete genome	100	1	Bacteria;Deferribacteres;Deferribacteres;Deferribacterales;Mucispirillaceae;Mucispirillum;Mucispirillum_schaedleri
k127_39237	40623	db_customA	S	CP097562.1	99.985	1	40623	0	74984	40623	CP097562.1 Mucispirillum schaedleri ASF457 chromosome; complete genome	100	1	Bacteria;Deferribacteres;Deferribacteres;Deferribacterales;Mucispirillaceae;Mucispirillum;Mucispirillum_schaedleri
k127_399057	8778	db_customA	S	CP097562.1	99.932	1	8778	0	16177	8778	CP097562.1 Mucispirillum schaedleri ASF457 chromosome; complete genome	100	1	Bacteria;Deferribacteres;Deferribacteres;Deferribacterales;Mucispirillaceae;Mucispirillum;Mucispirillum_schaedleri
k127_400040	33900	db_customA	S	CP097562.1	99.991	173	33900	0	62268	33900	CP097562.1 Mucispirillum schaedleri ASF457 chromosome; complete genome	99.4926	1	Bacteria;Deferribacteres;Deferribacteres;Deferribacterales;Mucispirillaceae;Mucispirillum;Mucispirillum_schaedleri
k127_4007072	568	db_customA	S	CP097562.1	98.592	1	568	0	1005	568	CP097562.1 Mucispirillum schaedleri ASF457 chromosome; complete genome	100	1	Bacteria;Deferribacteres;Deferribacteres;Deferribacterales;Mucispirillaceae;Mucispirillum;Mucispirillum_schaedleri
k127_4028324	1173	db_customA	S	CP097562.1	100	1	1173	0	2167	1173	CP097562.1 Mucispirillum schaedleri ASF457 chromosome; complete genome	100	1	Bacteria;Deferribacteres;Deferribacteres;Deferribacterales;Mucispirillaceae;Mucispirillum;Mucispirillum_schaedleri
k127_4196759	6771	db_customA	S	CP097562.1	97.704	125	6771	0	11439	6771	CP097562.1 Mucispirillum schaedleri ASF457 chromosome; complete genome	98.405	1	Bacteria;Deferribacteres;Deferribacteres;Deferribacterales;Mucispirillaceae;Mucispirillum;Mucispirillum_schaedleri
k127_422402	574	db_customA	S	CP097562.1	98.78	1	574	0	1022	574	CP097562.1 Mucispirillum schaedleri ASF457 chromosome; complete genome	100	1	Bacteria;Deferribacteres;Deferribacteres;Deferribacterales;Mucispirillaceae;Mucispirillum;Mucispirillum_schaedleri
k127_422405	489	db_customA	S	CP097562.1	100	1	489	0	904	489	CP097562.1 Mucispirillum schaedleri ASF457 chromosome; complete genome	100	1	Bacteria;Deferribacteres;Deferribacteres;Deferribacterales;Mucispirillaceae;Mucispirillum;Mucispirillum_schaedleri
k127_4248093	1656	db_customA	S	CP097562.1	100	1	1656	0	3059	1656	CP097562.1 Mucispirillum schaedleri ASF457 chromosome; complete genome	100	1	Bacteria;Deferribacteres;Deferribacteres;Deferribacterales;Mucispirillaceae;Mucispirillum;Mucispirillum_schaedleri
k127_4248109	775	db_customA	S	CP097562.1	100	1	775	0	1432	775	CP097562.1 Mucispirillum schaedleri ASF457 chromosome; complete genome	100	1	Bacteria;Deferribacteres;Deferribacteres;Deferribacterales;Mucispirillaceae;Mucispirillum;Mucispirillum_schaedleri
k127_4331742	8488	db_customA	S	CP097562.1	100	1	8488	0	15675	8488	CP097562.1 Mucispirillum schaedleri ASF457 chromosome; complete genome	100	1	Bacteria;Deferribacteres;Deferribacteres;Deferribacterales;Mucispirillaceae;Mucispirillum;Mucispirillum_schaedleri
k127_4336972	15835	db_customA	S	CP097562.1	99.829	1	15835	0	29093	15835	CP097562.1 Mucispirillum schaedleri ASF457 chromosome; complete genome	100	1	Bacteria;Deferribacteres;Deferribacteres;Deferribacterales;Mucispirillaceae;Mucispirillum;Mucispirillum_schaedleri
k127_4337744	75460	db_customA	S	CP097562.1	99.984	20380	75460	0	101700	75460	CP097562.1 Mucispirillum schaedleri ASF457 chromosome; complete genome	72.9963	1	Bacteria;Deferribacteres;Deferribacteres;Deferribacterales;Mucispirillaceae;Mucispirillum;Mucispirillum_schaedleri
k127_4360468	1497	db_customA	S	CP097562.1	99.933	1	1497	0	2760	1497	CP097562.1 Mucispirillum schaedleri ASF457 chromosome; complete genome	100	1	Bacteria;Deferribacteres;Deferribacteres;Deferribacterales;Mucispirillaceae;Mucispirillum;Mucispirillum_schaedleri
k127_4361714	1265	db_customA	S	CP097562.1	98.501	124	1257	0	2001	1265	CP097562.1 Mucispirillum schaedleri ASF457 chromosome; complete genome	89.6443	1	Bacteria;Deferribacteres;Deferribacteres;Deferribacterales;Mucispirillaceae;Mucispirillum;Mucispirillum_schaedleri
k127_4393209	45504	db_customA	S	CP097562.1	99.994	1	35705	0	65924	45504	CP097562.1 Mucispirillum schaedleri ASF457 chromosome; complete genome	78.4656	1	Bacteria;Deferribacteres;Deferribacteres;Deferribacterales;Mucispirillaceae;Mucispirillum;Mucispirillum_schaedleri
k127_4393217	3249	db_customA	S	CP097562.1	100	122	3249	0	5777	3249	CP097562.1 Mucispirillum schaedleri ASF457 chromosome; complete genome	96.2758	1	Bacteria;Deferribacteres;Deferribacteres;Deferribacterales;Mucispirillaceae;Mucispirillum;Mucispirillum_schaedleri
k127_4393695	11359	db_customA	S	CP097562.1	99.956	122	11359	0	20726	11359	CP097562.1 Mucispirillum schaedleri ASF457 chromosome; complete genome	98.9348	1	Bacteria;Deferribacteres;Deferribacteres;Deferribacterales;Mucispirillaceae;Mucispirillum;Mucispirillum_schaedleri
k127_454708	392	db_customA	S	CP097562.1	100	1	392	0	725	392	CP097562.1 Mucispirillum schaedleri ASF457 chromosome; complete genome	100	1	Bacteria;Deferribacteres;Deferribacteres;Deferribacterales;Mucispirillaceae;Mucispirillum;Mucispirillum_schaedleri
k127_4587982	529	db_customA	S	CP097562.1	99.433	1	529	0	961	529	CP097562.1 Mucispirillum schaedleri ASF457 chromosome; complete genome	100	1	Bacteria;Deferribacteres;Deferribacteres;Deferribacterales;Mucispirillaceae;Mucispirillum;Mucispirillum_schaedleri
k127_4659338	690	db_customA	S	CP097562.1	100	1	690	0	1275	690	CP097562.1 Mucispirillum schaedleri ASF457 chromosome; complete genome	100	1	Bacteria;Deferribacteres;Deferribacteres;Deferribacterales;Mucispirillaceae;Mucispirillum;Mucispirillum_schaedleri
k127_4684836	36441	db_customA	S	CP097562.1	99.992	1	36319	0	67052	36441	CP097562.1 Mucispirillum schaedleri ASF457 chromosome; complete genome	99.6652	1	Bacteria;Deferribacteres;Deferribacteres;Deferribacterales;Mucispirillaceae;Mucispirillum;Mucispirillum_schaedleri
k127_4725699	6057	db_customA	S	CP097562.1	99.983	1	6057	0	11180	6057	CP097562.1 Mucispirillum schaedleri ASF457 chromosome; complete genome	100	1	Bacteria;Deferribacteres;Deferribacteres;Deferribacterales;Mucispirillaceae;Mucispirillum;Mucispirillum_schaedleri
k127_4769267	9880	db_customA	S	CP097562.1	99.98	124	9880	0	18007	9880	CP097562.1 Mucispirillum schaedleri ASF457 chromosome; complete genome	98.7551	1	Bacteria;Deferribacteres;Deferribacteres;Deferribacterales;Mucispirillaceae;Mucispirillum;Mucispirillum_schaedleri
k127_4919301	16294	db_customA	S	CP097562.1	99.742	1	16257	0	29789	16294	CP097562.1 Mucispirillum schaedleri ASF457 chromosome; complete genome	99.7729	1	Bacteria;Deferribacteres;Deferribacteres;Deferribacterales;Mucispirillaceae;Mucispirillum;Mucispirillum_schaedleri
k127_4945350	3502	db_customA	S	CP097562.1	99.968	1	3154	0	5818	3502	CP097562.1 Mucispirillum schaedleri ASF457 chromosome; complete genome	90.0628	1	Bacteria;Deferribacteres;Deferribacteres;Deferribacterales;Mucispirillaceae;Mucispirillum;Mucispirillum_schaedleri
k127_5005296	446	db_customA	S	CP097562.1	100	1	446	0	824	446	CP097562.1 Mucispirillum schaedleri ASF457 chromosome; complete genome	100	1	Bacteria;Deferribacteres;Deferribacteres;Deferribacterales;Mucispirillaceae;Mucispirillum;Mucispirillum_schaedleri
k127_5015582	3848	db_customA	S	CP097562.1	99.74	1	3848	0	7051	3848	CP097562.1 Mucispirillum schaedleri ASF457 chromosome; complete genome	100	1	Bacteria;Deferribacteres;Deferribacteres;Deferribacterales;Mucispirillaceae;Mucispirillum;Mucispirillum_schaedleri
k127_5015696	2512	db_customA	S	CP097562.1	100	1	2512	0	4639	2512	CP097562.1 Mucispirillum schaedleri ASF457 chromosome; complete genome	100	1	Bacteria;Deferribacteres;Deferribacteres;Deferribacterales;Mucispirillaceae;Mucispirillum;Mucispirillum_schaedleri
k127_5097616	1669	db_customA	S	CP097562.1	99.676	126	1669	0	2824	1669	CP097562.1 Mucispirillum schaedleri ASF457 chromosome; complete genome	92.5105	1	Bacteria;Deferribacteres;Deferribacteres;Deferribacterales;Mucispirillaceae;Mucispirillum;Mucispirillum_schaedleri
k127_5146008	6446	db_customA	S	CP097562.1	99.612	1	6446	0	11766	6446	CP097562.1 Mucispirillum schaedleri ASF457 chromosome; complete genome	100	1	Bacteria;Deferribacteres;Deferribacteres;Deferribacterales;Mucispirillaceae;Mucispirillum;Mucispirillum_schaedleri
k127_531015	2966	db_customA	S	CP097562.1	99.794	54	2966	0	5347	2966	CP097562.1 Mucispirillum schaedleri ASF457 chromosome; complete genome	98.2131	1	Bacteria;Deferribacteres;Deferribacteres;Deferribacterales;Mucispirillaceae;Mucispirillum;Mucispirillum_schaedleri
k127_5566929	5911	db_customA	S	CP097562.1	99.949	1	5910	0	10898	5911	CP097562.1 Mucispirillum schaedleri ASF457 chromosome; complete genome	99.9831	1	Bacteria;Deferribacteres;Deferribacteres;Deferribacterales;Mucispirillaceae;Mucispirillum;Mucispirillum_schaedleri
k127_5569152	659	db_customA	S	CP097562.1	100	1	659	0	1218	659	CP097562.1 Mucispirillum schaedleri ASF457 chromosome; complete genome	100	1	Bacteria;Deferribacteres;Deferribacteres;Deferribacterales;Mucispirillaceae;Mucispirillum;Mucispirillum_schaedleri
k127_5694247	12643	db_customA	S	CP097562.1	99.937	1	12643	0	23303	12643	CP097562.1 Mucispirillum schaedleri ASF457 chromosome; complete genome	100	1	Bacteria;Deferribacteres;Deferribacteres;Deferribacterales;Mucispirillaceae;Mucispirillum;Mucispirillum_schaedleri
k127_5703485	34586	db_customA	S	CP097562.1	99.896	1	34544	0	63590	34586	CP097562.1 Mucispirillum schaedleri ASF457 chromosome; complete genome	99.8786	1	Bacteria;Deferribacteres;Deferribacteres;Deferribacterales;Mucispirillaceae;Mucispirillum;Mucispirillum_schaedleri
k127_5715626	12203	db_customA	S	CP097562.1	99.845	1	12203	0	22447	12203	CP097562.1 Mucispirillum schaedleri ASF457 chromosome; complete genome	100	1	Bacteria;Deferribacteres;Deferribacteres;Deferribacterales;Mucispirillaceae;Mucispirillum;Mucispirillum_schaedleri
k127_5771628	19735	db_customA	S	CP097562.1	99.783	826	19735	0	34694	19735	CP097562.1 Mucispirillum schaedleri ASF457 chromosome; complete genome	95.8247	1	Bacteria;Deferribacteres;Deferribacteres;Deferribacterales;Mucispirillaceae;Mucispirillum;Mucispirillum_schaedleri
k127_6002155	5243	db_customA	S	CP097562.1	99.924	1	5243	0	9659	5243	CP097562.1 Mucispirillum schaedleri ASF457 chromosome; complete genome	100	1	Bacteria;Deferribacteres;Deferribacteres;Deferribacterales;Mucispirillaceae;Mucispirillum;Mucispirillum_schaedleri
k127_6017447	32535	db_customA	S	CP097562.1	99.917	3	32535	0	59928	32535	CP097562.1 Mucispirillum schaedleri ASF457 chromosome; complete genome	99.9969	1	Bacteria;Deferribacteres;Deferribacteres;Deferribacterales;Mucispirillaceae;Mucispirillum;Mucispirillum_schaedleri
k127_6033394	6441	db_customA	S	CP097562.1	99.303	125	6440	0	11420	6441	CP097562.1 Mucispirillum schaedleri ASF457 chromosome; complete genome	98.0748	1	Bacteria;Deferribacteres;Deferribacteres;Deferribacterales;Mucispirillaceae;Mucispirillum;Mucispirillum_schaedleri
k127_6126375	321	db_customA	S	CP097562.1	100	1	321	1.67e-167	593	321	CP097562.1 Mucispirillum schaedleri ASF457 chromosome; complete genome	100	1	Bacteria;Deferribacteres;Deferribacteres;Deferribacterales;Mucispirillaceae;Mucispirillum;Mucispirillum_schaedleri
k127_6181708	861	db_customA	S	CP097562.1	100	1	861	0	1591	861	CP097562.1 Mucispirillum schaedleri ASF457 chromosome; complete genome	100	1	Bacteria;Deferribacteres;Deferribacteres;Deferribacterales;Mucispirillaceae;Mucispirillum;Mucispirillum_schaedleri
k127_6197239	10404	db_customA	S	CP097562.1	99.638	1	5518	0	10078	10404	CP097562.1 Mucispirillum schaedleri ASF457 chromosome; complete genome	53.0661	1	Bacteria;Deferribacteres;Deferribacteres;Deferribacterales;Mucispirillaceae;Mucispirillum;Mucispirillum_schaedleri
k127_6206358	26001	db_customA	S	CP097562.1	99.727	1	26001	0	47622	26001	CP097562.1 Mucispirillum schaedleri ASF457 chromosome; complete genome	100	1	Bacteria;Deferribacteres;Deferribacteres;Deferribacterales;Mucispirillaceae;Mucispirillum;Mucispirillum_schaedleri
k127_6499739	71055	db_customA	S	CP097562.1	99.986	1	70945	0	131000	71055	CP097562.1 Mucispirillum schaedleri ASF457 chromosome; complete genome	99.8466	1	Bacteria;Deferribacteres;Deferribacteres;Deferribacterales;Mucispirillaceae;Mucispirillum;Mucispirillum_schaedleri
k127_6504401	52363	db_customA	S	CP097562.1	99.979	1	52363	0	96634	52363	CP097562.1 Mucispirillum schaedleri ASF457 chromosome; complete genome	100	1	Bacteria;Deferribacteres;Deferribacteres;Deferribacterales;Mucispirillaceae;Mucispirillum;Mucispirillum_schaedleri
k127_6606216	3359	db_customA	S	CP097562.1	99.895	1	2856	0	5258	3359	CP097562.1 Mucispirillum schaedleri ASF457 chromosome; complete genome	85.0253	1	Bacteria;Deferribacteres;Deferribacteres;Deferribacterales;Mucispirillaceae;Mucispirillum;Mucispirillum_schaedleri
k127_6611031	925	db_customA	S	CP097562.1	100	1	925	0	1709	925	CP097562.1 Mucispirillum schaedleri ASF457 chromosome; complete genome	100	1	Bacteria;Deferribacteres;Deferribacteres;Deferribacterales;Mucispirillaceae;Mucispirillum;Mucispirillum_schaedleri
k127_6653726	2126	db_customA	S	CP097562.1	99.953	1	2126	0	3921	2126	CP097562.1 Mucispirillum schaedleri ASF457 chromosome; complete genome	100	1	Bacteria;Deferribacteres;Deferribacteres;Deferribacterales;Mucispirillaceae;Mucispirillum;Mucispirillum_schaedleri
k127_6659800	379	db_customA	S	CP097562.1	100	1	379	0	701	379	CP097562.1 Mucispirillum schaedleri ASF457 chromosome; complete genome	100	1	Bacteria;Deferribacteres;Deferribacteres;Deferribacterales;Mucispirillaceae;Mucispirillum;Mucispirillum_schaedleri
k127_6663843	29020	db_customA	S	CP097562.1	99.976	1	29020	0	53552	29020	CP097562.1 Mucispirillum schaedleri ASF457 chromosome; complete genome	100	1	Bacteria;Deferribacteres;Deferribacteres;Deferribacterales;Mucispirillaceae;Mucispirillum;Mucispirillum_schaedleri
k127_6690346	682	db_customA	S	CP097562.1	100	1	682	0	1260	682	CP097562.1 Mucispirillum schaedleri ASF457 chromosome; complete genome	100	1	Bacteria;Deferribacteres;Deferribacteres;Deferribacterales;Mucispirillaceae;Mucispirillum;Mucispirillum_schaedleri
k127_6746456	15690	db_customA	S	CP097562.1	99.975	1	15690	0	28951	15690	CP097562.1 Mucispirillum schaedleri ASF457 chromosome; complete genome	100	1	Bacteria;Deferribacteres;Deferribacteres;Deferribacterales;Mucispirillaceae;Mucispirillum;Mucispirillum_schaedleri
k127_6829404	14756	db_customA	S	CP097562.1	99.973	1	14756	0	27228	14756	CP097562.1 Mucispirillum schaedleri ASF457 chromosome; complete genome	100	1	Bacteria;Deferribacteres;Deferribacteres;Deferribacterales;Mucispirillaceae;Mucispirillum;Mucispirillum_schaedleri
k127_6856277	30097	db_customA	S	CP097562.1	99.944	1	30097	0	55498	30097	CP097562.1 Mucispirillum schaedleri ASF457 chromosome; complete genome	100	1	Bacteria;Deferribacteres;Deferribacteres;Deferribacterales;Mucispirillaceae;Mucispirillum;Mucispirillum_schaedleri
k127_6897419	3662	db_customA	S	CP097562.1	98.798	1	3662	0	6519	3662	CP097562.1 Mucispirillum schaedleri ASF457 chromosome; complete genome	100	1	Bacteria;Deferribacteres;Deferribacteres;Deferribacterales;Mucispirillaceae;Mucispirillum;Mucispirillum_schaedleri
k127_6920084	9708	db_customA	S	CP097562.1	99.969	1	9708	0	17911	9708	CP097562.1 Mucispirillum schaedleri ASF457 chromosome; complete genome	100	1	Bacteria;Deferribacteres;Deferribacteres;Deferribacterales;Mucispirillaceae;Mucispirillum;Mucispirillum_schaedleri
k127_693571	11481	db_customA	S	CP097562.1	99.991	1	11056	0	20412	11481	CP097562.1 Mucispirillum schaedleri ASF457 chromosome; complete genome	96.2982	1	Bacteria;Deferribacteres;Deferribacteres;Deferribacterales;Mucispirillaceae;Mucispirillum;Mucispirillum_schaedleri
k127_697164	45748	db_customA	S	CP097562.1	99.991	1	34565	0	63810	45748	CP097562.1 Mucispirillum schaedleri ASF457 chromosome; complete genome	75.5552	1	Bacteria;Deferribacteres;Deferribacteres;Deferribacterales;Mucispirillaceae;Mucispirillum;Mucispirillum_schaedleri
k127_706019	57125	db_customA	S	CP097562.1	99.995	1	38285	0	70687	57125	CP097562.1 Mucispirillum schaedleri ASF457 chromosome; complete genome	67.0197	1	Bacteria;Deferribacteres;Deferribacteres;Deferribacterales;Mucispirillaceae;Mucispirillum;Mucispirillum_schaedleri
k127_7075	5584	db_customA	S	CP097562.1	100	1	5584	0	10312	5584	CP097562.1 Mucispirillum schaedleri ASF457 chromosome; complete genome	100	1	Bacteria;Deferribacteres;Deferribacteres;Deferribacterales;Mucispirillaceae;Mucispirillum;Mucispirillum_schaedleri
k127_71810	18552	db_customA	S	CP097562.1	99.995	1	18552	0	34252	18552	CP097562.1 Mucispirillum schaedleri ASF457 chromosome; complete genome	100	1	Bacteria;Deferribacteres;Deferribacteres;Deferribacterales;Mucispirillaceae;Mucispirillum;Mucispirillum_schaedleri
k127_718376	5839	db_customA	S	CP097562.1	99.841	2687	5839	0	5795	5839	CP097562.1 Mucispirillum schaedleri ASF457 chromosome; complete genome	53.999	1	Bacteria;Deferribacteres;Deferribacteres;Deferribacterales;Mucispirillaceae;Mucispirillum;Mucispirillum_schaedleri
k127_72580	386	db_customA	S	CP097562.1	100	1	386	0	713	386	CP097562.1 Mucispirillum schaedleri ASF457 chromosome; complete genome	100	1	Bacteria;Deferribacteres;Deferribacteres;Deferribacterales;Mucispirillaceae;Mucispirillum;Mucispirillum_schaedleri
k127_7294606	545	db_customA	S	CP097562.1	99.817	1	545	0	1002	545	CP097562.1 Mucispirillum schaedleri ASF457 chromosome; complete genome	100	1	Bacteria;Deferribacteres;Deferribacteres;Deferribacterales;Mucispirillaceae;Mucispirillum;Mucispirillum_schaedleri
k127_730195	1995	db_customA	S	CP097562.1	100	124	1995	0	3458	1995	CP097562.1 Mucispirillum schaedleri ASF457 chromosome; complete genome	93.8346	1	Bacteria;Deferribacteres;Deferribacteres;Deferribacterales;Mucispirillaceae;Mucispirillum;Mucispirillum_schaedleri
k127_737454	1517	db_customA	S	CP097562.1	98.411	8	1517	0	2656	1517	CP097562.1 Mucispirillum schaedleri ASF457 chromosome; complete genome	99.5386	1	Bacteria;Deferribacteres;Deferribacteres;Deferribacterales;Mucispirillaceae;Mucispirillum;Mucispirillum_schaedleri
k127_800796	34995	db_customA	S	CP097562.1	99.98	126	34995	0	64353	34995	CP097562.1 Mucispirillum schaedleri ASF457 chromosome; complete genome	99.6457	1	Bacteria;Deferribacteres;Deferribacteres;Deferribacterales;Mucispirillaceae;Mucispirillum;Mucispirillum_schaedleri
k127_805620	45239	db_customA	S	CP097562.1	99.985	1	45239	0	83501	45239	CP097562.1 Mucispirillum schaedleri ASF457 chromosome; complete genome	100	1	Bacteria;Deferribacteres;Deferribacteres;Deferribacterales;Mucispirillaceae;Mucispirillum;Mucispirillum_schaedleri
k127_806196	9877	db_customA	S	CP097562.1	99.919	1	9877	0	18196	9877	CP097562.1 Mucispirillum schaedleri ASF457 chromosome; complete genome	100	1	Bacteria;Deferribacteres;Deferribacteres;Deferribacterales;Mucispirillaceae;Mucispirillum;Mucispirillum_schaedleri
k127_820914	1698	db_customA	S	CP097562.1	99.293	1	1698	0	3059	1698	CP097562.1 Mucispirillum schaedleri ASF457 chromosome; complete genome	100	1	Bacteria;Deferribacteres;Deferribacteres;Deferribacterales;Mucispirillaceae;Mucispirillum;Mucispirillum_schaedleri
k127_857398	13952	db_customA	S	CP097562.1	99.986	1	13952	0	25754	13952	CP097562.1 Mucispirillum schaedleri ASF457 chromosome; complete genome	100	1	Bacteria;Deferribacteres;Deferribacteres;Deferribacterales;Mucispirillaceae;Mucispirillum;Mucispirillum_schaedleri
k127_905613	3428	db_customA	S	CP097562.1	100	1	3428	0	6331	3428	CP097562.1 Mucispirillum schaedleri ASF457 chromosome; complete genome	100	1	Bacteria;Deferribacteres;Deferribacteres;Deferribacterales;Mucispirillaceae;Mucispirillum;Mucispirillum_schaedleri
k127_920116	10686	db_customA	S	CP097562.1	99.991	128	10686	0	19494	10686	CP097562.1 Mucispirillum schaedleri ASF457 chromosome; complete genome	98.8115	1	Bacteria;Deferribacteres;Deferribacteres;Deferribacterales;Mucispirillaceae;Mucispirillum;Mucispirillum_schaedleri
k127_957565	11210	db_customA	S	CP097562.1	99.768	1	11208	0	20554	11210	CP097562.1 Mucispirillum schaedleri ASF457 chromosome; complete genome	99.9822	1	Bacteria;Deferribacteres;Deferribacteres;Deferribacterales;Mucispirillaceae;Mucispirillum;Mucispirillum_schaedleri
k127_998756	24536	db_customA	S	CP097562.1	99.994	8366	24536	0	29857	24536	CP097562.1 Mucispirillum schaedleri ASF457 chromosome; complete genome	65.9072	1	Bacteria;Deferribacteres;Deferribacteres;Deferribacterales;Mucispirillaceae;Mucispirillum;Mucispirillum_schaedleri
k127_1843880	53415	nt	G	CP087263.1	98.765	31058	31138	6.9e-28	145	53415	CP087263.1 Brevibacillus sp. MMS20-4M-10-Y chromosome; complete genome	0.151643	1	Bacteria;Firmicutes;Bacilli;Bacillales;Paenibacillaceae;Brevibacillus;Brevibacillus
k127_1647232	690	nt	S	CP059679.1	99.13	1	690	0	1242	690	CP059679.1 Mammaliicoccus lentus strain H29 chromosome; complete genome	100	1	Bacteria;Firmicutes;Bacilli;Bacillales;Staphylococcaceae;Mammaliicoccus;Mammaliicoccus_lentus
k127_1877085	561	nt	S	CP059679.1	100	1	561	0	1037	561	CP059679.1 Mammaliicoccus lentus strain H29 chromosome; complete genome	100	1	Bacteria;Firmicutes;Bacilli;Bacillales;Staphylococcaceae;Mammaliicoccus;Mammaliicoccus_lentus
k127_2131847	1075	nt	S	CP059679.1	98.884	1	1075	0	1919	1075	CP059679.1 Mammaliicoccus lentus strain H29 chromosome; complete genome	100	1	Bacteria;Firmicutes;Bacilli;Bacillales;Staphylococcaceae;Mammaliicoccus;Mammaliicoccus_lentus
k127_248297	748	nt	S	CP059679.1	99.733	1	748	0	1369	748	CP059679.1 Mammaliicoccus lentus strain H29 chromosome; complete genome	100	1	Bacteria;Firmicutes;Bacilli;Bacillales;Staphylococcaceae;Mammaliicoccus;Mammaliicoccus_lentus
k127_4367656	1178	nt	S	CP059679.1	100	1	1178	0	2176	1178	CP059679.1 Mammaliicoccus lentus strain H29 chromosome; complete genome	100	1	Bacteria;Firmicutes;Bacilli;Bacillales;Staphylococcaceae;Mammaliicoccus;Mammaliicoccus_lentus
k127_4843208	875	nt	S	CP059679.1	100	1	875	0	1616	875	CP059679.1 Mammaliicoccus lentus strain H29 chromosome; complete genome	100	1	Bacteria;Firmicutes;Bacilli;Bacillales;Staphylococcaceae;Mammaliicoccus;Mammaliicoccus_lentus
k127_6429385	655	nt	S	CP059679.1	100	1	655	0	1210	655	CP059679.1 Mammaliicoccus lentus strain H29 chromosome; complete genome	100	1	Bacteria;Firmicutes;Bacilli;Bacillales;Staphylococcaceae;Mammaliicoccus;Mammaliicoccus_lentus
k127_7006679	714	nt	S	CP059679.1	99.16	1	714	0	1286	714	CP059679.1 Mammaliicoccus lentus strain H29 chromosome; complete genome	100	1	Bacteria;Firmicutes;Bacilli;Bacillales;Staphylococcaceae;Mammaliicoccus;Mammaliicoccus_lentus
k127_4271759	480	nt	S	CP077960.1	98.542	1	480	0	848	480	CP077960.1 Mammaliicoccus sciuri strain WHA07 chromosome; complete genome	100	1	Bacteria;Firmicutes;Bacilli;Bacillales;Staphylococcaceae;Mammaliicoccus;Mammaliicoccus_sciuri
k127_6399492	6200	nt	S	AB699882.1	99.944	845	6200	0	9875	6200	AB699882.1 Staphylococcus aureus DNA; IS1216V; Tn551; and four IS1216V; strain: PM1	86.3871	1	Bacteria;Firmicutes;Bacilli;Bacillales;Staphylococcaceae;Staphylococcus;Staphylococcus_aureus
k127_5885923	39072	nt	S	AE015929.1	94.681	36090	36181	5.04e-28	145	39072	AE015929.1 Staphylococcus epidermidis ATCC 12228; complete genome	0.240581	1	Bacteria;Firmicutes;Bacilli;Bacillales;Staphylococcaceae;Staphylococcus;Staphylococcus_epidermidis
k127_1566086	850	nt	S	CP075498.1	99.412	1	850	0	1543	850	CP075498.1 Staphylococcus xylosus strain Colony535 chromosome	100	1	Bacteria;Firmicutes;Bacilli;Bacillales;Staphylococcaceae;Staphylococcus;Staphylococcus_xylosus
k127_1589887	2548	nt	S	CP075498.1	99.858	468	1877	0	2593	2548	CP075498.1 Staphylococcus xylosus strain Colony535 chromosome	55.3375	1	Bacteria;Firmicutes;Bacilli;Bacillales;Staphylococcaceae;Staphylococcus;Staphylococcus_xylosus
k127_3776480	757	nt	S	CP075498.1	99.868	1	757	0	1393	757	CP075498.1 Staphylococcus xylosus strain Colony535 chromosome	100	1	Bacteria;Firmicutes;Bacilli;Bacillales;Staphylococcaceae;Staphylococcus;Staphylococcus_xylosus
k127_4058264	796	nt	S	CP075498.1	99.623	1	796	0	1454	796	CP075498.1 Staphylococcus xylosus strain Colony535 chromosome	100	1	Bacteria;Firmicutes;Bacilli;Bacillales;Staphylococcaceae;Staphylococcus;Staphylococcus_xylosus
k127_680800	1743	nt	S	CP075498.1	100	1	1743	0	3219	1743	CP075498.1 Staphylococcus xylosus strain Colony535 chromosome	100	1	Bacteria;Firmicutes;Bacilli;Bacillales;Staphylococcaceae;Staphylococcus;Staphylococcus_xylosus
k127_859491	571	nt	S	CP075498.1	100	1	571	0	1055	571	CP075498.1 Staphylococcus xylosus strain Colony535 chromosome	100	1	Bacteria;Firmicutes;Bacilli;Bacillales;Staphylococcaceae;Staphylococcus;Staphylococcus_xylosus
k127_1302594	686	nt	S	CP034169.1	100	248	686	0	811	686	CP034169.1 Enterococcus avium strain 352 chromosome; complete genome	63.9942	1	Bacteria;Firmicutes;Bacilli;Lactobacillales;Enterococcaceae;Enterococcus;Enterococcus_avium
k127_1954901	592	nt	S	CP034169.1	98.142	1	592	0	1033	592	CP034169.1 Enterococcus avium strain 352 chromosome; complete genome	100	1	Bacteria;Firmicutes;Bacilli;Lactobacillales;Enterococcaceae;Enterococcus;Enterococcus_avium
k127_25356	472	nt	S	CP034169.1	99.151	1	471	0	848	472	CP034169.1 Enterococcus avium strain 352 chromosome; complete genome	99.7881	1	Bacteria;Firmicutes;Bacilli;Lactobacillales;Enterococcaceae;Enterococcus;Enterococcus_avium
k127_2600333	1691	nt	S	CP034169.1	98.699	27	563	0	953	1691	CP034169.1 Enterococcus avium strain 352 chromosome; complete genome	31.8155	1	Bacteria;Firmicutes;Bacilli;Lactobacillales;Enterococcaceae;Enterococcus;Enterococcus_avium
k127_2909312	644	nt	S	CP034169.1	98.602	1	644	0	1140	644	CP034169.1 Enterococcus avium strain 352 chromosome; complete genome	100	1	Bacteria;Firmicutes;Bacilli;Lactobacillales;Enterococcaceae;Enterococcus;Enterococcus_avium
k127_3034907	904	nt	S	CP034169.1	99.862	1	726	0	1336	904	CP034169.1 Enterococcus avium strain 352 chromosome; complete genome	80.3097	1	Bacteria;Firmicutes;Bacilli;Lactobacillales;Enterococcaceae;Enterococcus;Enterococcus_avium
k127_4509248	607	nt	S	CP024590.1	99.341	1	607	0	1099	607	CP024590.1 Enterococcus avium strain FDAARGOS_184 chromosome; complete genome	100	1	Bacteria;Firmicutes;Bacilli;Lactobacillales;Enterococcaceae;Enterococcus;Enterococcus_avium
k127_549931	1280	nt	S	CP024590.1	99.922	1	1280	0	2359	1280	CP024590.1 Enterococcus avium strain FDAARGOS_184 chromosome; complete genome	100	1	Bacteria;Firmicutes;Bacilli;Lactobacillales;Enterococcaceae;Enterococcus;Enterococcus_avium
k127_5630493	1242	nt	S	CP034169.1	97.961	1	1027	0	1775	1242	CP034169.1 Enterococcus avium strain 352 chromosome; complete genome	82.9308	1	Bacteria;Firmicutes;Bacilli;Lactobacillales;Enterococcaceae;Enterococcus;Enterococcus_avium
k127_5794179	389	nt	S	CP034169.1	100	1	389	0	719	389	CP034169.1 Enterococcus avium strain 352 chromosome; complete genome	100	1	Bacteria;Firmicutes;Bacilli;Lactobacillales;Enterococcaceae;Enterococcus;Enterococcus_avium
k127_7053530	931	nt	S	CP034169.1	100	1	931	0	1720	931	CP034169.1 Enterococcus avium strain 352 chromosome; complete genome	100	1	Bacteria;Firmicutes;Bacilli;Lactobacillales;Enterococcaceae;Enterococcus;Enterococcus_avium
k127_5540903	819	nt	S	CP012367.1	99.756	1	819	0	1502	819	CP012367.1 Enterococcus durans strain KLDS6.0933 plasmid unnamed 1; complete sequence	100	1	Bacteria;Firmicutes;Bacilli;Lactobacillales;Enterococcaceae;Enterococcus;Enterococcus_durans
k127_1183334	2722	nt	S	LR607378.1	100	1	2722	0	5027	2722	LR607378.1 Enterococcus faecalis strain 4928STDY7387896 genome assembly; chromosome: 1	100	1	Bacteria;Firmicutes;Bacilli;Lactobacillales;Enterococcaceae;Enterococcus;Enterococcus_faecalis
k127_1417160	1042	nt	S	LR607378.1	100	1	1042	0	1925	1042	LR607378.1 Enterococcus faecalis strain 4928STDY7387896 genome assembly; chromosome: 1	100	1	Bacteria;Firmicutes;Bacilli;Lactobacillales;Enterococcaceae;Enterococcus;Enterococcus_faecalis
k127_168741	1935	nt	S	AF329367.1	100	1807	1935	1.09e-57	239	1935	AF329367.1 Enterococcus faecalis putative pathogenicity island; partial sequence; and IS905-like sequence; complete sequence	6.66667	1	Bacteria;Firmicutes;Bacilli;Lactobacillales;Enterococcaceae;Enterococcus;Enterococcus_faecalis
k127_1736458	4074	nt	S	AE016830.1	93.744	1	2013	0	3020	4074	AE016830.1 Enterococcus faecalis V583 chromosome; complete genome	49.4354	1	Bacteria;Firmicutes;Bacilli;Lactobacillales;Enterococcaceae;Enterococcus;Enterococcus_faecalis
k127_190619	2045	nt	S	LR607378.1	99.902	1	2045	0	3766	2045	LR607378.1 Enterococcus faecalis strain 4928STDY7387896 genome assembly; chromosome: 1	100	1	Bacteria;Firmicutes;Bacilli;Lactobacillales;Enterococcaceae;Enterococcus;Enterococcus_faecalis
k127_2072684	1468	nt	S	CP019512.1	99.523	1	1468	0	2673	1468	CP019512.1 Enterococcus faecalis strain CLB21560; complete genome	100	1	Bacteria;Firmicutes;Bacilli;Lactobacillales;Enterococcaceae;Enterococcus;Enterococcus_faecalis
k127_2134755	2179	nt	S	AE016830.1	100	1	2179	0	4024	2179	AE016830.1 Enterococcus faecalis V583 chromosome; complete genome	100	1	Bacteria;Firmicutes;Bacilli;Lactobacillales;Enterococcaceae;Enterococcus;Enterococcus_faecalis
k127_22414	515	nt	S	CP050491.1	100	1	515	0	952	515	CP050491.1 Enterococcus faecalis strain EGM183 chromosome; complete genome	100	1	Bacteria;Firmicutes;Bacilli;Lactobacillales;Enterococcaceae;Enterococcus;Enterococcus_faecalis
k127_2515248	3382	nt	S	AE016830.1	92.429	675	3382	0	3871	3382	AE016830.1 Enterococcus faecalis V583 chromosome; complete genome	80.4554	1	Bacteria;Firmicutes;Bacilli;Lactobacillales;Enterococcaceae;Enterococcus;Enterococcus_faecalis
k127_2560772	2435	nt	S	LR607378.1	100	1	2435	0	4497	2435	LR607378.1 Enterococcus faecalis strain 4928STDY7387896 genome assembly; chromosome: 1	100	1	Bacteria;Firmicutes;Bacilli;Lactobacillales;Enterococcaceae;Enterococcus;Enterococcus_faecalis
k127_2783766	1609	nt	S	AE016830.1	92.48	1	1609	0	2302	1609	AE016830.1 Enterococcus faecalis V583 chromosome; complete genome	100	1	Bacteria;Firmicutes;Bacilli;Lactobacillales;Enterococcaceae;Enterococcus;Enterococcus_faecalis
k127_2918350	385	nt	S	CP028720.1	99.481	1	385	0	701	385	CP028720.1 Enterococcus faecalis strain CVM N48037F chromosome; complete genome	100	1	Bacteria;Firmicutes;Bacilli;Lactobacillales;Enterococcaceae;Enterococcus;Enterococcus_faecalis
k127_2923450	1087	nt	S	LR607378.1	99.908	1	1087	0	2002	1087	LR607378.1 Enterococcus faecalis strain 4928STDY7387896 genome assembly; chromosome: 1	100	1	Bacteria;Firmicutes;Bacilli;Lactobacillales;Enterococcaceae;Enterococcus;Enterococcus_faecalis
k127_2965374	1314	nt	S	LR607378.1	99.924	1	1314	0	2422	1314	LR607378.1 Enterococcus faecalis strain 4928STDY7387896 genome assembly; chromosome: 1	100	1	Bacteria;Firmicutes;Bacilli;Lactobacillales;Enterococcaceae;Enterococcus;Enterococcus_faecalis
k127_2977742	7585	nt	S	MH830362.1	99.254	7452	7585	3.36e-58	243	7585	MH830362.1 Enterococcus faecalis plasmid p4; complete sequence	1.76664	1	Bacteria;Firmicutes;Bacilli;Lactobacillales;Enterococcaceae;Enterococcus;Enterococcus_faecalis
k127_2983514	2116	nt	S	LR962480.1	99.48	1	2116	0	3847	2116	LR962480.1 Enterococcus faecalis isolate 28157_4#348 genome assembly; chromosome: 1	100	1	Bacteria;Firmicutes;Bacilli;Lactobacillales;Enterococcaceae;Enterococcus;Enterococcus_faecalis
k127_3084671	1693	nt	S	LR607378.1	98.81	14	1693	0	2992	1693	LR607378.1 Enterococcus faecalis strain 4928STDY7387896 genome assembly; chromosome: 1	99.2321	1	Bacteria;Firmicutes;Bacilli;Lactobacillales;Enterococcaceae;Enterococcus;Enterococcus_faecalis
k127_3377316	683	nt	S	LR607378.1	100	1	683	0	1262	683	LR607378.1 Enterococcus faecalis strain 4928STDY7387896 genome assembly; chromosome: 1	100	1	Bacteria;Firmicutes;Bacilli;Lactobacillales;Enterococcaceae;Enterococcus;Enterococcus_faecalis
k127_3417320	1786	nt	S	CP002621.1	98.992	1	1786	0	3199	1786	CP002621.1 Enterococcus faecalis OG1RF; complete genome	100	1	Bacteria;Firmicutes;Bacilli;Lactobacillales;Enterococcaceae;Enterococcus;Enterococcus_faecalis
k127_3515341	1122	nt	S	AE016830.1	92.913	1	254	2.13e-97	370	1122	AE016830.1 Enterococcus faecalis V583 chromosome; complete genome	22.6381	1	Bacteria;Firmicutes;Bacilli;Lactobacillales;Enterococcaceae;Enterococcus;Enterococcus_faecalis
k127_3574321	1720	nt	S	LR962254.1	99.128	1	1720	0	3088	1720	LR962254.1 Enterococcus faecalis isolate 27688_1#231 genome assembly; chromosome: 1	100	1	Bacteria;Firmicutes;Bacilli;Lactobacillales;Enterococcaceae;Enterococcus;Enterococcus_faecalis
k127_3773442	729	nt	S	LR607378.1	100	1	729	0	1347	729	LR607378.1 Enterococcus faecalis strain 4928STDY7387896 genome assembly; chromosome: 1	100	1	Bacteria;Firmicutes;Bacilli;Lactobacillales;Enterococcaceae;Enterococcus;Enterococcus_faecalis
k127_3876070	2347	nt	S	CP078162.1	98.935	1	2347	0	4196	2347	CP078162.1 Enterococcus faecalis strain NS2 chromosome; complete genome	100	1	Bacteria;Firmicutes;Bacilli;Lactobacillales;Enterococcaceae;Enterococcus;Enterococcus_faecalis
k127_4199949	2084	nt	S	LR962137.1	99.712	1	2084	0	3816	2084	LR962137.1 Enterococcus faecalis isolate 26975_2#247 genome assembly; chromosome: 1	100	1	Bacteria;Firmicutes;Bacilli;Lactobacillales;Enterococcaceae;Enterococcus;Enterococcus_faecalis
k127_4396584	6426	nt	S	AE016830.1	92.745	4	4814	0	6944	6426	AE016830.1 Enterococcus faecalis V583 chromosome; complete genome	75.07	1	Bacteria;Firmicutes;Bacilli;Lactobacillales;Enterococcaceae;Enterococcus;Enterococcus_faecalis
k127_4492283	653	nt	S	CP041344.1	100	1	653	0	1206	653	CP041344.1 Enterococcus faecalis strain DM01 chromosome; complete genome	100	1	Bacteria;Firmicutes;Bacilli;Lactobacillales;Enterococcaceae;Enterococcus;Enterococcus_faecalis
k127_4493865	2565	nt	S	CP046113.1	99.766	1	2565	0	4704	2565	CP046113.1 Enterococcus faecalis strain 092160007-3 chromosome; complete genome	100	1	Bacteria;Firmicutes;Bacilli;Lactobacillales;Enterococcaceae;Enterococcus;Enterococcus_faecalis
k127_4629803	1882	nt	S	LR607378.1	99.947	1	1882	0	3470	1882	LR607378.1 Enterococcus faecalis strain 4928STDY7387896 genome assembly; chromosome: 1	100	1	Bacteria;Firmicutes;Bacilli;Lactobacillales;Enterococcaceae;Enterococcus;Enterococcus_faecalis
k127_4726465	1207	nt	S	CP043724.2	99.917	1	1207	0	2224	1207	CP043724.2 Enterococcus faecalis strain L14 chromosome	100	1	Bacteria;Firmicutes;Bacilli;Lactobacillales;Enterococcaceae;Enterococcus;Enterococcus_faecalis
k127_4826227	982	nt	S	LR962558.1	98.982	1	982	0	1759	982	LR962558.1 Enterococcus faecalis isolate 27688_1#353 genome assembly; chromosome: 1	100	1	Bacteria;Firmicutes;Bacilli;Lactobacillales;Enterococcaceae;Enterococcus;Enterococcus_faecalis
k127_4971986	3485	db_customA	S	UGIX01000004.1	100	1	3485	0	6436	3485	UGIX01000004.1 Enterococcus faecalis strain NCTC13379 genome assembly; contig: ERS1353917SCcontig000004; whole genome shotgun sequence	100	1	Bacteria;Firmicutes;Bacilli;Lactobacillales;Enterococcaceae;Enterococcus;Enterococcus_faecalis
k127_5109653	1028	nt	S	AP017623.1	100	1	1028	0	1899	1028	AP017623.1 Enterococcus faecalis DNA; complete genome; strain: W11	100	1	Bacteria;Firmicutes;Bacilli;Lactobacillales;Enterococcaceae;Enterococcus;Enterococcus_faecalis
k127_5170616	2152	nt	S	LR607378.1	99.489	1	2152	0	3914	2152	LR607378.1 Enterococcus faecalis strain 4928STDY7387896 genome assembly; chromosome: 1	100	1	Bacteria;Firmicutes;Bacilli;Lactobacillales;Enterococcaceae;Enterococcus;Enterococcus_faecalis
k127_5479200	2243	nt	S	LR607378.1	99.688	1	2243	0	4104	2243	LR607378.1 Enterococcus faecalis strain 4928STDY7387896 genome assembly; chromosome: 1	100	1	Bacteria;Firmicutes;Bacilli;Lactobacillales;Enterococcaceae;Enterococcus;Enterococcus_faecalis
k127_5811564	3522	nt	S	CP030042.1	99.83	1	3522	0	6471	3522	CP030042.1 Enterococcus faecalis strain C25 chromosome; complete genome	100	1	Bacteria;Firmicutes;Bacilli;Lactobacillales;Enterococcaceae;Enterococcus;Enterococcus_faecalis
k127_581750	8308	nt	S	MH830362.1	99.254	1	134	3.68e-58	243	8308	MH830362.1 Enterococcus faecalis plasmid p4; complete sequence	1.6129	1	Bacteria;Firmicutes;Bacilli;Lactobacillales;Enterococcaceae;Enterococcus;Enterococcus_faecalis
k127_5872432	2426	nt	S	LR607378.1	99.835	1	2426	0	4458	2426	LR607378.1 Enterococcus faecalis strain 4928STDY7387896 genome assembly; chromosome: 1	100	1	Bacteria;Firmicutes;Bacilli;Lactobacillales;Enterococcaceae;Enterococcus;Enterococcus_faecalis
k127_6108754	1323	nt	S	CP028285.1	98.259	1	1321	0	2313	1323	CP028285.1 Enterococcus faecalis strain FDAARGOS_324 chromosome; complete genome	99.8488	1	Bacteria;Firmicutes;Bacilli;Lactobacillales;Enterococcaceae;Enterococcus;Enterococcus_faecalis
k127_613391	2697	nt	S	LR962146.1	99.258	1	2697	0	4868	2697	LR962146.1 Enterococcus faecalis isolate 26975_2#102 genome assembly; chromosome: 1	100	1	Bacteria;Firmicutes;Bacilli;Lactobacillales;Enterococcaceae;Enterococcus;Enterococcus_faecalis
k127_6397056	2960	nt	S	LR962811.1	99.459	1	2960	0	5376	2960	LR962811.1 Enterococcus faecalis isolate 28157_4#319 genome assembly; chromosome: 1	100	1	Bacteria;Firmicutes;Bacilli;Lactobacillales;Enterococcaceae;Enterococcus;Enterococcus_faecalis
k127_6400524	494	db_customA	S	AE016830.1	97.548	126	492	7.29e-178	628	494	AE016830.1 Enterococcus faecalis V583 chromosome; complete genome	74.2915	1	Bacteria;Firmicutes;Bacilli;Lactobacillales;Enterococcaceae;Enterococcus;Enterococcus_faecalis
k127_6459361	1197	nt	S	AP025270.1	99.749	1	1197	0	2194	1197	AP025270.1 Enterococcus faecalis K-4 DNA; complete genome	100	1	Bacteria;Firmicutes;Bacilli;Lactobacillales;Enterococcaceae;Enterococcus;Enterococcus_faecalis
k127_6656236	2080	nt	S	OD940434.1	99.423	1	2080	0	3775	2080	OD940434.1 Enterococcus faecalis isolate BX5936 genome assembly; chromosome: contig000001	100	1	Bacteria;Firmicutes;Bacilli;Lactobacillales;Enterococcaceae;Enterococcus;Enterococcus_faecalis
k127_70607	4245	nt	S	LR962251.1	98.658	1	4245	0	7524	4245	LR962251.1 Enterococcus faecalis isolate 27688_1#114 genome assembly; chromosome: 1	100	1	Bacteria;Firmicutes;Bacilli;Lactobacillales;Enterococcaceae;Enterococcus;Enterococcus_faecalis
k127_7232542	2100	nt	S	LR607378.1	99.905	1	2100	0	3868	2100	LR607378.1 Enterococcus faecalis strain 4928STDY7387896 genome assembly; chromosome: 1	100	1	Bacteria;Firmicutes;Bacilli;Lactobacillales;Enterococcaceae;Enterococcus;Enterococcus_faecalis
k127_83473	3489	nt	S	AE016830.1	94.384	1	463	0	712	3489	AE016830.1 Enterococcus faecalis V583 chromosome; complete genome	13.2703	1	Bacteria;Firmicutes;Bacilli;Lactobacillales;Enterococcaceae;Enterococcus;Enterococcus_faecalis
k127_953117	712	nt	S	AE016830.1	94.522	1	712	0	1099	712	AE016830.1 Enterococcus faecalis V583 chromosome; complete genome	100	1	Bacteria;Firmicutes;Bacilli;Lactobacillales;Enterococcaceae;Enterococcus;Enterococcus_faecalis
k127_1045369	573	nt	S	AP024831.1	99.476	1	573	0	1042	573	AP024831.1 Enterococcus faecium AA620 DNA; complete genome	100	1	Bacteria;Firmicutes;Bacilli;Lactobacillales;Enterococcaceae;Enterococcus;Enterococcus_faecium
k127_1137602	1504	nt	S	MT951616.1	95.346	1	1504	0	2390	1504	MT951616.1 Enterococcus faecium strain KresVRE0002	100	1	Bacteria;Firmicutes;Bacilli;Lactobacillales;Enterococcaceae;Enterococcus;Enterococcus_faecium
k127_1173780	1471	nt	S	AP019408.1	98.3	1	1471	0	2579	1471	AP019408.1 Enterococcus faecium SMVRE20 DNA; complete genome	100	1	Bacteria;Firmicutes;Bacilli;Lactobacillales;Enterococcaceae;Enterococcus;Enterococcus_faecium
k127_1428889	2086	nt	S	AP024831.1	99.521	1	2086	0	3797	2086	AP024831.1 Enterococcus faecium AA620 DNA; complete genome	100	1	Bacteria;Firmicutes;Bacilli;Lactobacillales;Enterococcaceae;Enterococcus;Enterococcus_faecium
k127_1613759	7098	nt	S	LR135174.1	96.726	115	5274	0	8591	7098	LR135174.1 Enterococcus faecium isolate E4402 genome assembly; chromosome: 1	72.7247	1	Bacteria;Firmicutes;Bacilli;Lactobacillales;Enterococcaceae;Enterococcus;Enterococcus_faecium
k127_1657069	48014	nt	S	LR135359.1	97.037	1	135	5.98e-53	228	48014	LR135359.1 Enterococcus faecium isolate E7948 genome assembly; plasmid: 3	0.281168	1	Bacteria;Firmicutes;Bacilli;Lactobacillales;Enterococcaceae;Enterococcus;Enterococcus_faecium
k127_1761595	633	nt	S	KT825491.1	99.526	1	633	0	1153	633	KT825491.1 Enterococcus faecium strain N15-508 vancomycin resistance gene cluster; partial sequence	100	1	Bacteria;Firmicutes;Bacilli;Lactobacillales;Enterococcaceae;Enterococcus;Enterococcus_faecium
k127_209040	28544	nt	S	CP040875.1	99.719	25335	28540	0	5871	28544	CP040875.1 Enterococcus faecium strain DB-1 chromosome; complete genome	11.2318	1	Bacteria;Firmicutes;Bacilli;Lactobacillales;Enterococcaceae;Enterococcus;Enterococcus_faecium
k127_2149820	40202	nt	S	MT951616.1	94.082	9880	10369	0	743	40202	MT951616.1 Enterococcus faecium strain KresVRE0002	1.21884	1	Bacteria;Firmicutes;Bacilli;Lactobacillales;Enterococcaceae;Enterococcus;Enterococcus_faecium
k127_2150595	531	db_customA	S	GG692539.1	100	1	531	0	981	531	GG692539.1 Enterococcus faecium 1;230;933 genomic scaffold supercont1.3; whole genome shotgun sequence	100	1	Bacteria;Firmicutes;Bacilli;Lactobacillales;Enterococcaceae;Enterococcus;Enterococcus_faecium
k127_2377336	770	nt	S	KT825491.1	99.74	1	770	0	1411	770	KT825491.1 Enterococcus faecium strain N15-508 vancomycin resistance gene cluster; partial sequence	100	1	Bacteria;Firmicutes;Bacilli;Lactobacillales;Enterococcaceae;Enterococcus;Enterococcus_faecium
k127_2472144	1876	nt	S	CP084178.1	99.267	74	1574	0	2710	1876	CP084178.1 Enterococcus faecium strain 4995/20 chromosome; complete genome	80.0107	1	Bacteria;Firmicutes;Bacilli;Lactobacillales;Enterococcaceae;Enterococcus;Enterococcus_faecium
k127_3060294	31785	nt	S	KT825491.1	90.088	276	1290	0	1308	31785	KT825491.1 Enterococcus faecium strain N15-508 vancomycin resistance gene cluster; partial sequence	3.20591	1	Bacteria;Firmicutes;Bacilli;Lactobacillales;Enterococcaceae;Enterococcus;Enterococcus_faecium
k127_3091794	1591	nt	S	AP024833.1	99.686	1	1591	0	2911	1591	AP024833.1 Enterococcus faecium AA620 plasmid pAA620-2 DNA; complete genome	100	1	Bacteria;Firmicutes;Bacilli;Lactobacillales;Enterococcaceae;Enterococcus;Enterococcus_faecium
k127_3232925	434	nt	S	MT951615.1	100	1	434	0	802	434	MT951615.1 Enterococcus faecium strain KresVRE0001	100	1	Bacteria;Firmicutes;Bacilli;Lactobacillales;Enterococcaceae;Enterococcus;Enterococcus_faecium
k127_3652306	1400	nt	S	AP019408.1	99.214	1	1400	0	2523	1400	AP019408.1 Enterococcus faecium SMVRE20 DNA; complete genome	100	1	Bacteria;Firmicutes;Bacilli;Lactobacillales;Enterococcaceae;Enterococcus;Enterococcus_faecium
k127_3696179	1085	nt	S	KT825491.1	98.445	1	836	0	1471	1085	KT825491.1 Enterococcus faecium strain N15-508 vancomycin resistance gene cluster; partial sequence	77.0507	1	Bacteria;Firmicutes;Bacilli;Lactobacillales;Enterococcaceae;Enterococcus;Enterococcus_faecium
k127_3857653	81446	nt	S	MT951616.1	93.196	57064	57547	0	712	81446	MT951616.1 Enterococcus faecium strain KresVRE0002	0.595487	1	Bacteria;Firmicutes;Bacilli;Lactobacillales;Enterococcaceae;Enterococcus;Enterococcus_faecium
k127_4103011	2675	nt	S	AP019408.1	94.975	1	2203	0	3432	2675	AP019408.1 Enterococcus faecium SMVRE20 DNA; complete genome	82.5794	1	Bacteria;Firmicutes;Bacilli;Lactobacillales;Enterococcaceae;Enterococcus;Enterococcus_faecium
k127_4558664	950	nt	S	MT951616.1	97.152	3	950	0	1602	950	MT951616.1 Enterococcus faecium strain KresVRE0002	99.7895	1	Bacteria;Firmicutes;Bacilli;Lactobacillales;Enterococcaceae;Enterococcus;Enterococcus_faecium
k127_4850815	9075	nt	S	KT825491.1	90.343	2148	2788	0	841	9075	KT825491.1 Enterococcus faecium strain N15-508 vancomycin resistance gene cluster; partial sequence	7.07438	1	Bacteria;Firmicutes;Bacilli;Lactobacillales;Enterococcaceae;Enterococcus;Enterococcus_faecium
k127_4972494	976	nt	S	AP019408.1	97.624	7	974	0	1661	976	AP019408.1 Enterococcus faecium SMVRE20 DNA; complete genome	99.1803	1	Bacteria;Firmicutes;Bacilli;Lactobacillales;Enterococcaceae;Enterococcus;Enterococcus_faecium
k127_509726	1683	nt	S	AP019408.1	98.462	1	260	6.69e-124	459	1683	AP019408.1 Enterococcus faecium SMVRE20 DNA; complete genome	15.4486	1	Bacteria;Firmicutes;Bacilli;Lactobacillales;Enterococcaceae;Enterococcus;Enterococcus_faecium
k127_5101824	1098	nt	S	AP024831.1	99.271	1	1098	0	1984	1098	AP024831.1 Enterococcus faecium AA620 DNA; complete genome	100	1	Bacteria;Firmicutes;Bacilli;Lactobacillales;Enterococcaceae;Enterococcus;Enterococcus_faecium
k127_5122574	2567	nt	S	LR135258.1	98.54	1	136	4.05e-58	241	2567	LR135258.1 Enterococcus faecium isolate E4457 genome assembly; chromosome: 1	5.33697	1	Bacteria;Firmicutes;Bacilli;Lactobacillales;Enterococcaceae;Enterococcus;Enterococcus_faecium
k127_5718905	9541	nt	S	AP024831.1	90.886	7344	8499	0	1550	9541	AP024831.1 Enterococcus faecium AA620 DNA; complete genome	12.1895	2	Bacteria;Firmicutes;Bacilli;Lactobacillales;Enterococcaceae;Enterococcus;Enterococcus_faecium
k127_5749999	15129	nt	S	KT825491.1	92.421	13982	14797	0	1166	15129	KT825491.1 Enterococcus faecium strain N15-508 vancomycin resistance gene cluster; partial sequence	5.40683	1	Bacteria;Firmicutes;Bacilli;Lactobacillales;Enterococcaceae;Enterococcus;Enterococcus_faecium
k127_5789098	5947	nt	S	KT825491.1	93.019	1	5821	0	8495	5947	KT825491.1 Enterococcus faecium strain N15-508 vancomycin resistance gene cluster; partial sequence	98.0326	1	Bacteria;Firmicutes;Bacilli;Lactobacillales;Enterococcaceae;Enterococcus;Enterococcus_faecium
k127_5791431	1668	nt	S	AP024831.1	97.962	1	1668	0	2892	1668	AP024831.1 Enterococcus faecium AA620 DNA; complete genome	100	1	Bacteria;Firmicutes;Bacilli;Lactobacillales;Enterococcaceae;Enterococcus;Enterococcus_faecium
k127_5799750	1851	nt	S	AP019408.1	99.028	1	1851	0	3319	1851	AP019408.1 Enterococcus faecium SMVRE20 DNA; complete genome	100	1	Bacteria;Firmicutes;Bacilli;Lactobacillales;Enterococcaceae;Enterococcus;Enterococcus_faecium
k127_581994	1219	nt	S	AP024831.1	99.426	1	1219	0	2211	1219	AP024831.1 Enterococcus faecium AA620 DNA; complete genome	100	1	Bacteria;Firmicutes;Bacilli;Lactobacillales;Enterococcaceae;Enterococcus;Enterococcus_faecium
k127_5893989	2559	nt	S	LR135359.1	93.859	1	2178	0	3280	2559	LR135359.1 Enterococcus faecium isolate E7948 genome assembly; plasmid: 3	85.2677	1	Bacteria;Firmicutes;Bacilli;Lactobacillales;Enterococcaceae;Enterococcus;Enterococcus_faecium
k127_5919497	2054	nt	S	AP024831.1	98.612	585	1881	0	2296	2054	AP024831.1 Enterococcus faecium AA620 DNA; complete genome	63.1451	2	Bacteria;Firmicutes;Bacilli;Lactobacillales;Enterococcaceae;Enterococcus;Enterococcus_faecium
k127_6042852	967	nt	S	AP019408.1	97.098	4	967	0	1626	967	AP019408.1 Enterococcus faecium SMVRE20 DNA; complete genome	99.7932	1	Bacteria;Firmicutes;Bacilli;Lactobacillales;Enterococcaceae;Enterococcus;Enterococcus_faecium
k127_6042868	604	nt	S	AP024831.1	98.667	5	604	0	1064	604	AP024831.1 Enterococcus faecium AA620 DNA; complete genome	99.3377	1	Bacteria;Firmicutes;Bacilli;Lactobacillales;Enterococcaceae;Enterococcus;Enterococcus_faecium
k127_6220315	2856	nt	S	LR135359.1	93.917	1	2613	0	3945	2856	LR135359.1 Enterococcus faecium isolate E7948 genome assembly; plasmid: 3	91.5266	1	Bacteria;Firmicutes;Bacilli;Lactobacillales;Enterococcaceae;Enterococcus;Enterococcus_faecium
k127_6240982	1192	nt	S	AP024831.1	97.243	542	1192	0	1103	1192	AP024831.1 Enterococcus faecium AA620 DNA; complete genome	54.7819	1	Bacteria;Firmicutes;Bacilli;Lactobacillales;Enterococcaceae;Enterococcus;Enterococcus_faecium
k127_6865081	1145	nt	S	CP040875.1	97.729	1	1145	0	1971	1145	CP040875.1 Enterococcus faecium strain DB-1 chromosome; complete genome	100	1	Bacteria;Firmicutes;Bacilli;Lactobacillales;Enterococcaceae;Enterococcus;Enterococcus_faecium
k127_7108218	862	nt	S	AP019408.1	99.884	1	862	0	1587	862	AP019408.1 Enterococcus faecium SMVRE20 DNA; complete genome	100	1	Bacteria;Firmicutes;Bacilli;Lactobacillales;Enterococcaceae;Enterococcus;Enterococcus_faecium
k127_7137847	866	nt	S	AP024831.1	97.225	2	866	0	1465	866	AP024831.1 Enterococcus faecium AA620 DNA; complete genome	99.8845	1	Bacteria;Firmicutes;Bacilli;Lactobacillales;Enterococcaceae;Enterococcus;Enterococcus_faecium
k127_7205434	734	nt	S	KT825491.1	99.06	203	734	0	955	734	KT825491.1 Enterococcus faecium strain N15-508 vancomycin resistance gene cluster; partial sequence	72.4796	1	Bacteria;Firmicutes;Bacilli;Lactobacillales;Enterococcaceae;Enterococcus;Enterococcus_faecium
k127_7241775	1626	nt	S	CP065773.1	100	1506	1626	2.57e-53	224	1626	CP065773.1 Enterococcus faecium strain 16-164 chromosome; complete genome	7.44157	1	Bacteria;Firmicutes;Bacilli;Lactobacillales;Enterococcaceae;Enterococcus;Enterococcus_faecium
k127_725328	10523	nt	S	CP068244.1	98.513	1	269	1.52e-127	473	10523	CP068244.1 Enterococcus faecium strain fac90 chromosome; complete genome	2.55631	1	Bacteria;Firmicutes;Bacilli;Lactobacillales;Enterococcaceae;Enterococcus;Enterococcus_faecium
k127_863960	27268	nt	S	CP040875.1	99.506	25446	27268	0	3315	27268	CP040875.1 Enterococcus faecium strain DB-1 chromosome; complete genome	6.68549	1	Bacteria;Firmicutes;Bacilli;Lactobacillales;Enterococcaceae;Enterococcus;Enterococcus_faecium
k127_950612	487	nt	S	LR135358.1	98.413	1	126	2.62e-53	222	487	LR135358.1 Enterococcus faecium isolate E7948 genome assembly; plasmid: 2	25.8727	1	Bacteria;Firmicutes;Bacilli;Lactobacillales;Enterococcaceae;Enterococcus;Enterococcus_faecium
k127_950813	2132	nt	S	CP016163.1	99.939	258	1888	0	3007	2132	CP016163.1 Enterococcus faecium strain ISMMS_VRE_11; complete genome	76.5009	1	Bacteria;Firmicutes;Bacilli;Lactobacillales;Enterococcaceae;Enterococcus;Enterococcus_faecium
k127_974549	2410	nt	S	KR610408.1	97.14	1	2410	0	4069	2410	KR610408.1 Enterococcus faecium strain 448-18961R transposon Tn6218-like; complete sequence	100	1	Bacteria;Firmicutes;Bacilli;Lactobacillales;Enterococcaceae;Enterococcus;Enterococcus_faecium
k127_990145	1266	nt	S	LR135359.1	96.215	263	1266	0	1642	1266	LR135359.1 Enterococcus faecium isolate E7948 genome assembly; plasmid: 3	79.3049	1	Bacteria;Firmicutes;Bacilli;Lactobacillales;Enterococcaceae;Enterococcus;Enterococcus_faecium
k127_5820717	2698	nt	S	AP022822.1	95.318	1509	2698	0	1892	2698	AP022822.1 Enterococcus saigonensis VE80 DNA; complete genome	44.3291	2	Bacteria;Firmicutes;Bacilli;Lactobacillales;Enterococcaceae;Enterococcus;Enterococcus_saigonensis
k127_2572531	70831	nt	S	CP024610.1	98.925	70457	70549	1.95e-34	167	70831	CP024610.1 Lactobacillus terrae strain NIBRBAC000499792 chromosome; complete genome	0.131298	1	Bacteria;Firmicutes;Bacilli;Lactobacillales;Lactobacillaceae;Lactobacillus;Lactobacillus_terrae
k127_13158	24875	nt	S	CP039849.1	95.627	191	16769	0	26587	24875	CP039849.1 Ligilactobacillus animalis strain LL1 chromosome; complete genome	66.7337	1	Bacteria;Firmicutes;Bacilli;Lactobacillales;Lactobacillaceae;Ligilactobacillus;Ligilactobacillus_animalis
k127_3239519	19401	nt	S	CP039849.1	92.16	127	6382	0	8835	19401	CP039849.1 Ligilactobacillus animalis strain LL1 chromosome; complete genome	32.2818	1	Bacteria;Firmicutes;Bacilli;Lactobacillales;Lactobacillaceae;Ligilactobacillus;Ligilactobacillus_animalis
k127_1156259	6959	db_customA	S	CP097561.1	99.986	1	6959	0	12846	6959	CP097561.1 Ligilactobacillus murinus ASF361 chromosome; complete genome	100	1	Bacteria;Firmicutes;Bacilli;Lactobacillales;Lactobacillaceae;Ligilactobacillus;Ligilactobacillus_murinus
k127_1175064	4233	db_customA	S	CP097561.1	99.781	125	4233	0	7539	4233	CP097561.1 Ligilactobacillus murinus ASF361 chromosome; complete genome	97.0706	1	Bacteria;Firmicutes;Bacilli;Lactobacillales;Lactobacillaceae;Ligilactobacillus;Ligilactobacillus_murinus
k127_120398	1589	db_customA	S	CP097561.1	99.559	1	1589	0	2896	1589	CP097561.1 Ligilactobacillus murinus ASF361 chromosome; complete genome	100	1	Bacteria;Firmicutes;Bacilli;Lactobacillales;Lactobacillaceae;Ligilactobacillus;Ligilactobacillus_murinus
k127_1205928	663	db_customA	S	VIQY01000030.1	100	1	663	0	1225	663	VIQY01000030.1 Ligilactobacillus murinus strain MD040 7_Assembly.final.scaffolds_scaffold47.1; whole genome shotgun sequence	100	1	Bacteria;Firmicutes;Bacilli;Lactobacillales;Lactobacillaceae;Ligilactobacillus;Ligilactobacillus_murinus
k127_1205934	13014	nt	S	CP023566.1	99.173	1626	11788	0	18303	13014	CP023566.1 Ligilactobacillus murinus strain CR141 chromosome; complete genome	78.0928	2	Bacteria;Firmicutes;Bacilli;Lactobacillales;Lactobacillaceae;Ligilactobacillus;Ligilactobacillus_murinus
k127_1208607	1760	db_customA	S	CP097561.1	100	1	1760	0	3251	1760	CP097561.1 Ligilactobacillus murinus ASF361 chromosome; complete genome	100	1	Bacteria;Firmicutes;Bacilli;Lactobacillales;Lactobacillaceae;Ligilactobacillus;Ligilactobacillus_murinus
k127_1356417	16943	db_customA	S	VIQY01000042.1	99.882	1	16943	0	31178	16943	VIQY01000042.1 Ligilactobacillus murinus strain MD040 7_Assembly.final.scaffolds_scaffold17.1; whole genome shotgun sequence	100	1	Bacteria;Firmicutes;Bacilli;Lactobacillales;Lactobacillaceae;Ligilactobacillus;Ligilactobacillus_murinus
k127_141336	11994	db_customA	S	CP097561.1	99.942	1	11994	0	22111	11994	CP097561.1 Ligilactobacillus murinus ASF361 chromosome; complete genome	100	1	Bacteria;Firmicutes;Bacilli;Lactobacillales;Lactobacillaceae;Ligilactobacillus;Ligilactobacillus_murinus
k127_1484125	53353	db_customA	S	VIQY01000013.1	99.971	1	51215	0	94496	53353	VIQY01000013.1 Ligilactobacillus murinus strain MD040 7_Assembly.final.scaffolds_scaffold6.1; whole genome shotgun sequence	95.9965	1	Bacteria;Firmicutes;Bacilli;Lactobacillales;Lactobacillaceae;Ligilactobacillus;Ligilactobacillus_murinus
k127_1588543	39220	db_customA	S	VIQY01000054.1	99.995	1	39098	0	72190	39220	VIQY01000054.1 Ligilactobacillus murinus strain MD040 7_Assembly.final.scaffolds_scaffold7.1; whole genome shotgun sequence	99.6889	1	Bacteria;Firmicutes;Bacilli;Lactobacillales;Lactobacillaceae;Ligilactobacillus;Ligilactobacillus_murinus
k127_1603250	54490	db_customA	S	CP097561.1	99.909	1	49297	0	90784	54490	CP097561.1 Ligilactobacillus murinus ASF361 chromosome; complete genome	90.4753	1	Bacteria;Firmicutes;Bacilli;Lactobacillales;Lactobacillaceae;Ligilactobacillus;Ligilactobacillus_murinus
k127_1624323	17321	db_customA	S	CP097561.1	99.925	1	17321	0	31914	17321	CP097561.1 Ligilactobacillus murinus ASF361 chromosome; complete genome	100	1	Bacteria;Firmicutes;Bacilli;Lactobacillales;Lactobacillaceae;Ligilactobacillus;Ligilactobacillus_murinus
k127_1719353	2557	db_customA	S	CP097561.1	100	152	2557	0	4444	2557	CP097561.1 Ligilactobacillus murinus ASF361 chromosome; complete genome	94.0946	1	Bacteria;Firmicutes;Bacilli;Lactobacillales;Lactobacillaceae;Ligilactobacillus;Ligilactobacillus_murinus
k127_1739983	4019	db_customA	S	CP097561.1	100	1	3893	0	7190	4019	CP097561.1 Ligilactobacillus murinus ASF361 chromosome; complete genome	96.8649	1	Bacteria;Firmicutes;Bacilli;Lactobacillales;Lactobacillaceae;Ligilactobacillus;Ligilactobacillus_murinus
k127_1740023	1137	db_customA	S	CP097561.1	99.462	952	1137	3.28e-90	339	1137	CP097561.1 Ligilactobacillus murinus ASF361 chromosome; complete genome	16.3588	1	Bacteria;Firmicutes;Bacilli;Lactobacillales;Lactobacillaceae;Ligilactobacillus;Ligilactobacillus_murinus
k127_1837376	275	db_customA	S	CP097561.1	100	1	275	5.25e-142	508	275	CP097561.1 Ligilactobacillus murinus ASF361 chromosome; complete genome	100	1	Bacteria;Firmicutes;Bacilli;Lactobacillales;Lactobacillaceae;Ligilactobacillus;Ligilactobacillus_murinus
k127_1858576	4466	db_customA	S	JACBXZ010000217.1	99.978	1	4466	0	8240	4466	JACBXZ010000217.1 Ligilactobacillus murinus strain LAC NODE_19_length_31049_cov_19.916_ID_37; whole genome shotgun sequence	100	1	Bacteria;Firmicutes;Bacilli;Lactobacillales;Lactobacillaceae;Ligilactobacillus;Ligilactobacillus_murinus
k127_1858581	11821	db_customA	S	CP097561.1	99.983	1	11821	0	21819	11821	CP097561.1 Ligilactobacillus murinus ASF361 chromosome; complete genome	100	1	Bacteria;Firmicutes;Bacilli;Lactobacillales;Lactobacillaceae;Ligilactobacillus;Ligilactobacillus_murinus
k127_1878054	23445	db_customA	S	VIQY01000014.1	99.991	34	23445	0	43223	23445	VIQY01000014.1 Ligilactobacillus murinus strain MD040 7_Assembly.final.scaffolds_scaffold32.1; whole genome shotgun sequence	99.8592	1	Bacteria;Firmicutes;Bacilli;Lactobacillales;Lactobacillaceae;Ligilactobacillus;Ligilactobacillus_murinus
k127_1879509	21355	db_customA	S	VIQY01000063.1	100	3932	21355	0	32177	21355	VIQY01000063.1 Ligilactobacillus murinus strain MD040 7_Assembly.final.scaffolds_scaffold35.1; whole genome shotgun sequence	81.5921	1	Bacteria;Firmicutes;Bacilli;Lactobacillales;Lactobacillaceae;Ligilactobacillus;Ligilactobacillus_murinus
k127_1882611	8433	db_customA	S	VIQY01000053.1	100	1	8433	0	15573	8433	VIQY01000053.1 Ligilactobacillus murinus strain MD040 7_Assembly.final.scaffolds_scaffold63.1; whole genome shotgun sequence	100	1	Bacteria;Firmicutes;Bacilli;Lactobacillales;Lactobacillaceae;Ligilactobacillus;Ligilactobacillus_murinus
k127_1904220	1343	db_customA	S	VIQY01000083.1	100	1	1343	0	2481	1343	VIQY01000083.1 Ligilactobacillus murinus strain MD040 7_Assembly.final.scaffolds_scaffold46.1; whole genome shotgun sequence	100	1	Bacteria;Firmicutes;Bacilli;Lactobacillales;Lactobacillaceae;Ligilactobacillus;Ligilactobacillus_murinus
k127_1963184	3631	db_customA	S	CP097561.1	100	1377	3631	0	4165	3631	CP097561.1 Ligilactobacillus murinus ASF361 chromosome; complete genome	62.1041	1	Bacteria;Firmicutes;Bacilli;Lactobacillales;Lactobacillaceae;Ligilactobacillus;Ligilactobacillus_murinus
k127_2017021	297	db_customA	S	JACBXZ010000080.1	100	1	297	3.37e-154	549	297	JACBXZ010000080.1 Ligilactobacillus murinus strain LAC NODE_94_length_3261_cov_56.4225_ID_187; whole genome shotgun sequence	100	1	Bacteria;Firmicutes;Bacilli;Lactobacillales;Lactobacillaceae;Ligilactobacillus;Ligilactobacillus_murinus
k127_2103969	4336	nt	S	CP040852.1	94.991	285	4336	0	6359	4336	CP040852.1 Ligilactobacillus murinus strain V10 chromosome; complete genome	93.4732	2	Bacteria;Firmicutes;Bacilli;Lactobacillales;Lactobacillaceae;Ligilactobacillus;Ligilactobacillus_murinus
k127_2116556	5183	db_customA	S	CP097561.1	99.843	99	5183	0	9347	5183	CP097561.1 Ligilactobacillus murinus ASF361 chromosome; complete genome	98.1092	1	Bacteria;Firmicutes;Bacilli;Lactobacillales;Lactobacillaceae;Ligilactobacillus;Ligilactobacillus_murinus
k127_2130392	10970	db_customA	S	CP097561.1	100	1	10970	0	20258	10970	CP097561.1 Ligilactobacillus murinus ASF361 chromosome; complete genome	100	1	Bacteria;Firmicutes;Bacilli;Lactobacillales;Lactobacillaceae;Ligilactobacillus;Ligilactobacillus_murinus
k127_2156040	49005	db_customA	S	JACBXZ010000008.1	99.193	21750	49005	0	49114	49005	JACBXZ010000008.1 Ligilactobacillus murinus strain LAC NODE_10_length_42713_cov_17.2227_ID_19; whole genome shotgun sequence	55.627	2	Bacteria;Firmicutes;Bacilli;Lactobacillales;Lactobacillaceae;Ligilactobacillus;Ligilactobacillus_murinus
k127_2174701	29779	db_customA	S	VIQY01000009.1	99.993	7	29098	0	53712	29779	VIQY01000009.1 Ligilactobacillus murinus strain MD040 7_Assembly.final.scaffolds_scaffold25.1; whole genome shotgun sequence	97.693	1	Bacteria;Firmicutes;Bacilli;Lactobacillales;Lactobacillaceae;Ligilactobacillus;Ligilactobacillus_murinus
k127_2263752	4120	nt	S	CP023565.1	100	1	4120	0	7609	4120	CP023565.1 Ligilactobacillus murinus strain CR147 chromosome; complete genome	100	1	Bacteria;Firmicutes;Bacilli;Lactobacillales;Lactobacillaceae;Ligilactobacillus;Ligilactobacillus_murinus
k127_2299725	1286	nt	S	CP040852.1	99.213	1	127	4.33e-55	230	1286	CP040852.1 Ligilactobacillus murinus strain V10 chromosome; complete genome	9.87558	1	Bacteria;Firmicutes;Bacilli;Lactobacillales;Lactobacillaceae;Ligilactobacillus;Ligilactobacillus_murinus
k127_2303490	25815	db_customA	S	VIQY01000042.1	99.974	1	11549	0	21311	25815	VIQY01000042.1 Ligilactobacillus murinus strain MD040 7_Assembly.final.scaffolds_scaffold17.1; whole genome shotgun sequence	44.7376	1	Bacteria;Firmicutes;Bacilli;Lactobacillales;Lactobacillaceae;Ligilactobacillus;Ligilactobacillus_murinus
k127_2304070	3419	db_customA	S	CP097561.1	100	1	3275	0	6048	3419	CP097561.1 Ligilactobacillus murinus ASF361 chromosome; complete genome	95.7882	1	Bacteria;Firmicutes;Bacilli;Lactobacillales;Lactobacillaceae;Ligilactobacillus;Ligilactobacillus_murinus
k127_2304077	35313	db_customA	S	VIQY01000023.1	99.991	1	22769	0	42036	35313	VIQY01000023.1 Ligilactobacillus murinus strain MD040 7_Assembly.final.scaffolds_scaffold20.1; whole genome shotgun sequence	64.4777	1	Bacteria;Firmicutes;Bacilli;Lactobacillales;Lactobacillaceae;Ligilactobacillus;Ligilactobacillus_murinus
k127_2304081	1673	db_customA	S	CP097561.1	99.93	126	1550	0	2627	1673	CP097561.1 Ligilactobacillus murinus ASF361 chromosome; complete genome	85.1763	1	Bacteria;Firmicutes;Bacilli;Lactobacillales;Lactobacillaceae;Ligilactobacillus;Ligilactobacillus_murinus
k127_2332479	32925	db_customA	S	VIQY01000015.1	99.997	229	32925	0	60375	32925	VIQY01000015.1 Ligilactobacillus murinus strain MD040 7_Assembly.final.scaffolds_scaffold9.1; whole genome shotgun sequence	99.3075	1	Bacteria;Firmicutes;Bacilli;Lactobacillales;Lactobacillaceae;Ligilactobacillus;Ligilactobacillus_murinus
k127_234801	1126	db_customA	S	CP097561.1	99.645	1	1126	0	2058	1126	CP097561.1 Ligilactobacillus murinus ASF361 chromosome; complete genome	100	1	Bacteria;Firmicutes;Bacilli;Lactobacillales;Lactobacillaceae;Ligilactobacillus;Ligilactobacillus_murinus
k127_237891	14875	db_customA	S	VIQY01000049.1	100	1	14875	0	27470	14875	VIQY01000049.1 Ligilactobacillus murinus strain MD040 7_Assembly.final.scaffolds_scaffold12.1; whole genome shotgun sequence	100	1	Bacteria;Firmicutes;Bacilli;Lactobacillales;Lactobacillaceae;Ligilactobacillus;Ligilactobacillus_murinus
k127_238916	442	db_customA	S	CP097561.1	100	1	442	0	817	442	CP097561.1 Ligilactobacillus murinus ASF361 chromosome; complete genome	100	1	Bacteria;Firmicutes;Bacilli;Lactobacillales;Lactobacillaceae;Ligilactobacillus;Ligilactobacillus_murinus
k127_2444370	359	db_customA	S	CP097561.1	100	1	359	0	664	359	CP097561.1 Ligilactobacillus murinus ASF361 chromosome; complete genome	100	1	Bacteria;Firmicutes;Bacilli;Lactobacillales;Lactobacillaceae;Ligilactobacillus;Ligilactobacillus_murinus
k127_2503371	1035	db_customA	S	VIQY01000079.1	100	1	1035	0	1912	1035	VIQY01000079.1 Ligilactobacillus murinus strain MD040 7_Assembly.final.scaffolds_scaffold37.1; whole genome shotgun sequence	100	1	Bacteria;Firmicutes;Bacilli;Lactobacillales;Lactobacillaceae;Ligilactobacillus;Ligilactobacillus_murinus
k127_2526514	3937	db_customA	S	CP097561.1	99.843	1	1905	0	3502	3937	CP097561.1 Ligilactobacillus murinus ASF361 chromosome; complete genome	48.3871	1	Bacteria;Firmicutes;Bacilli;Lactobacillales;Lactobacillaceae;Ligilactobacillus;Ligilactobacillus_murinus
k127_2550069	20564	db_customA	S	VIQY01000064.1	99.995	1	20564	0	37970	20564	VIQY01000064.1 Ligilactobacillus murinus strain MD040 7_Assembly.final.scaffolds_scaffold36.1; whole genome shotgun sequence	100	1	Bacteria;Firmicutes;Bacilli;Lactobacillales;Lactobacillaceae;Ligilactobacillus;Ligilactobacillus_murinus
k127_2581925	85387	db_customA	S	VIQY01000089.1	99.994	1	85387	0	157700	85387	VIQY01000089.1 Ligilactobacillus murinus strain MD040 7_Assembly.final.scaffolds_scaffold1.1; whole genome shotgun sequence	100	1	Bacteria;Firmicutes;Bacilli;Lactobacillales;Lactobacillaceae;Ligilactobacillus;Ligilactobacillus_murinus
k127_2582632	19593	db_customA	S	VIQY01000088.1	99.99	128	19593	0	35936	19593	VIQY01000088.1 Ligilactobacillus murinus strain MD040 7_Assembly.final.scaffolds_scaffold33.1; whole genome shotgun sequence	99.3518	1	Bacteria;Firmicutes;Bacilli;Lactobacillales;Lactobacillaceae;Ligilactobacillus;Ligilactobacillus_murinus
k127_2588291	287	db_customA	S	CP023565.1	100	1	287	1.18e-148	531	287	CP023565.1 Ligilactobacillus murinus strain CR147 chromosome; complete genome	100	1	Bacteria;Firmicutes;Bacilli;Lactobacillales;Lactobacillaceae;Ligilactobacillus;Ligilactobacillus_murinus
k127_2603233	877	db_customA	S	CP097561.1	100	1	877	0	1620	877	CP097561.1 Ligilactobacillus murinus ASF361 chromosome; complete genome	100	1	Bacteria;Firmicutes;Bacilli;Lactobacillales;Lactobacillaceae;Ligilactobacillus;Ligilactobacillus_murinus
k127_262445	13526	db_customA	S	VIQY01000062.1	99.993	1	13399	0	24738	13526	VIQY01000062.1 Ligilactobacillus murinus strain MD040 7_Assembly.final.scaffolds_scaffold50.1; whole genome shotgun sequence	99.0611	1	Bacteria;Firmicutes;Bacilli;Lactobacillales;Lactobacillaceae;Ligilactobacillus;Ligilactobacillus_murinus
k127_2698614	5163	db_customA	S	VIQY01000031.1	100	1	5163	0	9535	5163	VIQY01000031.1 Ligilactobacillus murinus strain MD040 7_Assembly.final.scaffolds_scaffold55.1; whole genome shotgun sequence	100	1	Bacteria;Firmicutes;Bacilli;Lactobacillales;Lactobacillaceae;Ligilactobacillus;Ligilactobacillus_murinus
k127_2749883	1507	nt	S	CP040852.1	92.329	453	1165	0	1013	1507	CP040852.1 Ligilactobacillus murinus strain V10 chromosome; complete genome	47.578	1	Bacteria;Firmicutes;Bacilli;Lactobacillales;Lactobacillaceae;Ligilactobacillus;Ligilactobacillus_murinus
k127_2775881	37286	db_customA	S	JACBXZ010000112.1	99.792	7530	29164	0	39704	37286	JACBXZ010000112.1 Ligilactobacillus murinus strain LAC NODE_21_length_27783_cov_17.9164_ID_41; whole genome shotgun sequence	58.0432	2	Bacteria;Firmicutes;Bacilli;Lactobacillales;Lactobacillaceae;Ligilactobacillus;Ligilactobacillus_murinus
k127_2946290	10375	nt	S	CP040852.1	92.318	201	4025	0	5432	10375	CP040852.1 Ligilactobacillus murinus strain V10 chromosome; complete genome	37.012	1	Bacteria;Firmicutes;Bacilli;Lactobacillales;Lactobacillaceae;Ligilactobacillus;Ligilactobacillus_murinus
k127_2960135	24437	db_customA	S	VIQY01000082.1	100	127	21866	0	40147	24437	VIQY01000082.1 Ligilactobacillus murinus strain MD040 7_Assembly.final.scaffolds_scaffold4.1; whole genome shotgun sequence	88.9635	1	Bacteria;Firmicutes;Bacilli;Lactobacillales;Lactobacillaceae;Ligilactobacillus;Ligilactobacillus_murinus
k127_2961581	103293	db_customA	S	VIQY01000081.1	99.992	3371	102655	0	183300	103293	VIQY01000081.1 Ligilactobacillus murinus strain MD040 7_Assembly.final.scaffolds_scaffold2.1; whole genome shotgun sequence	96.1198	1	Bacteria;Firmicutes;Bacilli;Lactobacillales;Lactobacillaceae;Ligilactobacillus;Ligilactobacillus_murinus
k127_2961584	5310	db_customA	S	VIQY01000031.1	100	1	5310	0	9806	5310	VIQY01000031.1 Ligilactobacillus murinus strain MD040 7_Assembly.final.scaffolds_scaffold55.1; whole genome shotgun sequence	100	1	Bacteria;Firmicutes;Bacilli;Lactobacillales;Lactobacillaceae;Ligilactobacillus;Ligilactobacillus_murinus
k127_2961601	3590	db_customA	S	VIQY01000095.1	100	1	3590	0	6630	3590	VIQY01000095.1 Ligilactobacillus murinus strain MD040 7_Assembly.final.scaffolds_scaffold82.1; whole genome shotgun sequence	100	1	Bacteria;Firmicutes;Bacilli;Lactobacillales;Lactobacillaceae;Ligilactobacillus;Ligilactobacillus_murinus
k127_2961607	6301	db_customA	S	VIQY01000028.1	99.984	1	6301	0	11631	6301	VIQY01000028.1 Ligilactobacillus murinus strain MD040 7_Assembly.final.scaffolds_scaffold71.1; whole genome shotgun sequence	100	1	Bacteria;Firmicutes;Bacilli;Lactobacillales;Lactobacillaceae;Ligilactobacillus;Ligilactobacillus_murinus
k127_2985272	3042	db_customA	S	VIQY01000017.1	100	1	3042	0	5618	3042	VIQY01000017.1 Ligilactobacillus murinus strain MD040 7_Assembly.final.scaffolds_scaffold60.1; whole genome shotgun sequence	100	1	Bacteria;Firmicutes;Bacilli;Lactobacillales;Lactobacillaceae;Ligilactobacillus;Ligilactobacillus_murinus
k127_2985996	32841	db_customA	S	VIQY01000026.1	99.99	13342	32841	0	35999	32841	VIQY01000026.1 Ligilactobacillus murinus strain MD040 7_Assembly.final.scaffolds_scaffold41.1; whole genome shotgun sequence	59.377	3	Bacteria;Firmicutes;Bacilli;Lactobacillales;Lactobacillaceae;Ligilactobacillus;Ligilactobacillus_murinus
k127_299819	27207	db_customA	S	VIQY01000002.1	100	1	27081	0	50010	27207	VIQY01000002.1 Ligilactobacillus murinus strain MD040 7_Assembly.final.scaffolds_scaffold24.1; whole genome shotgun sequence	99.5369	1	Bacteria;Firmicutes;Bacilli;Lactobacillales;Lactobacillaceae;Ligilactobacillus;Ligilactobacillus_murinus
k127_303183	1541	db_customA	S	VIQY01000037.1	100	1	1541	0	2846	1541	VIQY01000037.1 Ligilactobacillus murinus strain MD040 7_Assembly.final.scaffolds_scaffold89.1; whole genome shotgun sequence	100	1	Bacteria;Firmicutes;Bacilli;Lactobacillales;Lactobacillaceae;Ligilactobacillus;Ligilactobacillus_murinus
k127_3065291	6268	db_customA	S	CP097561.1	100	1	6268	0	11575	6268	CP097561.1 Ligilactobacillus murinus ASF361 chromosome; complete genome	100	1	Bacteria;Firmicutes;Bacilli;Lactobacillales;Lactobacillaceae;Ligilactobacillus;Ligilactobacillus_murinus
k127_3065829	18497	nt	S	CP040852.1	92.932	10823	14990	0	6063	18497	CP040852.1 Ligilactobacillus murinus strain V10 chromosome; complete genome	22.5658	2	Bacteria;Firmicutes;Bacilli;Lactobacillales;Lactobacillaceae;Ligilactobacillus;Ligilactobacillus_murinus
k127_3089455	19533	db_customA	S	VIQY01000079.1	99.98	1	19533	0	36049	19533	VIQY01000079.1 Ligilactobacillus murinus strain MD040 7_Assembly.final.scaffolds_scaffold37.1; whole genome shotgun sequence	100	1	Bacteria;Firmicutes;Bacilli;Lactobacillales;Lactobacillaceae;Ligilactobacillus;Ligilactobacillus_murinus
k127_3170466	13848	db_customA	S	CP097561.1	99.963	1	13459	0	24827	13848	CP097561.1 Ligilactobacillus murinus ASF361 chromosome; complete genome	97.1982	1	Bacteria;Firmicutes;Bacilli;Lactobacillales;Lactobacillaceae;Ligilactobacillus;Ligilactobacillus_murinus
k127_3170537	2212	db_customA	S	CP097561.1	100	1	2212	0	4085	2212	CP097561.1 Ligilactobacillus murinus ASF361 chromosome; complete genome	100	1	Bacteria;Firmicutes;Bacilli;Lactobacillales;Lactobacillaceae;Ligilactobacillus;Ligilactobacillus_murinus
k127_3195965	10338	db_customA	S	JACBXZ010000098.1	99.99	1	10338	0	19086	10338	JACBXZ010000098.1 Ligilactobacillus murinus strain LAC NODE_63_length_10749_cov_24.924_ID_125; whole genome shotgun sequence	100	1	Bacteria;Firmicutes;Bacilli;Lactobacillales;Lactobacillaceae;Ligilactobacillus;Ligilactobacillus_murinus
k127_3239525	2603	nt	S	CP023565.1	100	1	233	2.27e-115	431	2603	CP023565.1 Ligilactobacillus murinus strain CR147 chromosome; complete genome	8.95121	1	Bacteria;Firmicutes;Bacilli;Lactobacillales;Lactobacillaceae;Ligilactobacillus;Ligilactobacillus_murinus
k127_3289576	3594	db_customA	S	CP097561.1	100	1	3594	0	6637	3594	CP097561.1 Ligilactobacillus murinus ASF361 chromosome; complete genome	100	1	Bacteria;Firmicutes;Bacilli;Lactobacillales;Lactobacillaceae;Ligilactobacillus;Ligilactobacillus_murinus
k127_3289718	3164	db_customA	S	CP097561.1	100	1	3164	0	5843	3164	CP097561.1 Ligilactobacillus murinus ASF361 chromosome; complete genome	100	1	Bacteria;Firmicutes;Bacilli;Lactobacillales;Lactobacillaceae;Ligilactobacillus;Ligilactobacillus_murinus
k127_329065	1130	db_customA	S	CP097561.1	98.855	1	961	0	1714	1130	CP097561.1 Ligilactobacillus murinus ASF361 chromosome; complete genome	85.0442	1	Bacteria;Firmicutes;Bacilli;Lactobacillales;Lactobacillaceae;Ligilactobacillus;Ligilactobacillus_murinus
k127_3365550	560	db_customA	S	CP097561.1	100	1	560	0	1035	560	CP097561.1 Ligilactobacillus murinus ASF361 chromosome; complete genome	100	1	Bacteria;Firmicutes;Bacilli;Lactobacillales;Lactobacillaceae;Ligilactobacillus;Ligilactobacillus_murinus
k127_3378159	14945	db_customA	S	VIQY01000030.1	100	1	14767	0	27270	14945	VIQY01000030.1 Ligilactobacillus murinus strain MD040 7_Assembly.final.scaffolds_scaffold47.1; whole genome shotgun sequence	98.809	1	Bacteria;Firmicutes;Bacilli;Lactobacillales;Lactobacillaceae;Ligilactobacillus;Ligilactobacillus_murinus
k127_3390651	333	db_customA	S	CP097561.1	100	1	333	3.72e-174	616	333	CP097561.1 Ligilactobacillus murinus ASF361 chromosome; complete genome	100	1	Bacteria;Firmicutes;Bacilli;Lactobacillales;Lactobacillaceae;Ligilactobacillus;Ligilactobacillus_murinus
k127_3408147	510	nt	S	CP023565.1	98.039	1	510	0	887	510	CP023565.1 Ligilactobacillus murinus strain CR147 chromosome; complete genome	100	1	Bacteria;Firmicutes;Bacilli;Lactobacillales;Lactobacillaceae;Ligilactobacillus;Ligilactobacillus_murinus
k127_3463982	2058	db_customA	S	CP097561.1	99.019	1	1936	0	3470	2058	CP097561.1 Ligilactobacillus murinus ASF361 chromosome; complete genome	94.0719	1	Bacteria;Firmicutes;Bacilli;Lactobacillales;Lactobacillaceae;Ligilactobacillus;Ligilactobacillus_murinus
k127_3464225	8242	db_customA	S	CP097561.1	100	1	8117	0	14990	8242	CP097561.1 Ligilactobacillus murinus ASF361 chromosome; complete genome	98.4834	1	Bacteria;Firmicutes;Bacilli;Lactobacillales;Lactobacillaceae;Ligilactobacillus;Ligilactobacillus_murinus
k127_3466195	18478	db_customA	S	CP097561.1	100	125	18478	0	33894	18478	CP097561.1 Ligilactobacillus murinus ASF361 chromosome; complete genome	99.3289	1	Bacteria;Firmicutes;Bacilli;Lactobacillales;Lactobacillaceae;Ligilactobacillus;Ligilactobacillus_murinus
k127_3466231	1533	db_customA	S	JACBXZ010000146.1	100	1	1533	0	2832	1533	JACBXZ010000146.1 Ligilactobacillus murinus strain LAC NODE_113_length_1652_cov_21.6525_ID_225; whole genome shotgun sequence	100	1	Bacteria;Firmicutes;Bacilli;Lactobacillales;Lactobacillaceae;Ligilactobacillus;Ligilactobacillus_murinus
k127_350538	3169	db_customA	S	VIQY01000049.1	99.716	1	3169	0	5803	3169	VIQY01000049.1 Ligilactobacillus murinus strain MD040 7_Assembly.final.scaffolds_scaffold12.1; whole genome shotgun sequence	100	1	Bacteria;Firmicutes;Bacilli;Lactobacillales;Lactobacillaceae;Ligilactobacillus;Ligilactobacillus_murinus
k127_3527603	5518	db_customA	S	VIQY01000005.1	100	1	5462	0	10087	5518	VIQY01000005.1 Ligilactobacillus murinus strain MD040 7_Assembly.final.scaffolds_scaffold5.1; whole genome shotgun sequence	98.9851	1	Bacteria;Firmicutes;Bacilli;Lactobacillales;Lactobacillaceae;Ligilactobacillus;Ligilactobacillus_murinus
k127_3538535	1683	db_customA	S	CP097561.1	100	1	1557	0	2876	1683	CP097561.1 Ligilactobacillus murinus ASF361 chromosome; complete genome	92.5134	1	Bacteria;Firmicutes;Bacilli;Lactobacillales;Lactobacillaceae;Ligilactobacillus;Ligilactobacillus_murinus
k127_3659069	27169	db_customA	S	CP097561.1	99.978	3	27024	0	49868	27169	CP097561.1 Ligilactobacillus murinus ASF361 chromosome; complete genome	99.4589	1	Bacteria;Firmicutes;Bacilli;Lactobacillales;Lactobacillaceae;Ligilactobacillus;Ligilactobacillus_murinus
k127_3676167	5708	db_customA	S	VIQY01000027.1	100	1	5708	0	10541	5708	VIQY01000027.1 Ligilactobacillus murinus strain MD040 7_Assembly.final.scaffolds_scaffold72.1; whole genome shotgun sequence	100	1	Bacteria;Firmicutes;Bacilli;Lactobacillales;Lactobacillaceae;Ligilactobacillus;Ligilactobacillus_murinus
k127_3677101	540	nt	S	CP040852.1	99.63	1	540	0	987	540	CP040852.1 Ligilactobacillus murinus strain V10 chromosome; complete genome	100	1	Bacteria;Firmicutes;Bacilli;Lactobacillales;Lactobacillaceae;Ligilactobacillus;Ligilactobacillus_murinus
k127_3685207	3520	db_customA	S	VIQY01000039.1	99.336	713	3422	0	4905	3520	VIQY01000039.1 Ligilactobacillus murinus strain MD040 7_Assembly.final.scaffolds_scaffold21.1; whole genome shotgun sequence	76.9886	2	Bacteria;Firmicutes;Bacilli;Lactobacillales;Lactobacillaceae;Ligilactobacillus;Ligilactobacillus_murinus
k127_3713579	4464	db_customA	S	VIQY01000087.1	100	1	4464	0	8244	4464	VIQY01000087.1 Ligilactobacillus murinus strain MD040 7_Assembly.final.scaffolds_scaffold74.1; whole genome shotgun sequence	100	1	Bacteria;Firmicutes;Bacilli;Lactobacillales;Lactobacillaceae;Ligilactobacillus;Ligilactobacillus_murinus
k127_3713598	436	db_customA	S	CP097561.1	100	1	436	0	806	436	CP097561.1 Ligilactobacillus murinus ASF361 chromosome; complete genome	100	1	Bacteria;Firmicutes;Bacilli;Lactobacillales;Lactobacillaceae;Ligilactobacillus;Ligilactobacillus_murinus
k127_3714043	32713	db_customA	S	CP097561.1	100	126	32713	0	60179	32713	CP097561.1 Ligilactobacillus murinus ASF361 chromosome; complete genome	99.6179	1	Bacteria;Firmicutes;Bacilli;Lactobacillales;Lactobacillaceae;Ligilactobacillus;Ligilactobacillus_murinus
k127_3721840	475	db_customA	S	CP023565.1	100	1	475	0	878	475	CP023565.1 Ligilactobacillus murinus strain CR147 chromosome; complete genome	100	1	Bacteria;Firmicutes;Bacilli;Lactobacillales;Lactobacillaceae;Ligilactobacillus;Ligilactobacillus_murinus
k127_3774411	2834	db_customA	S	CP097561.1	99.33	1	2834	0	5129	2834	CP097561.1 Ligilactobacillus murinus ASF361 chromosome; complete genome	100	1	Bacteria;Firmicutes;Bacilli;Lactobacillales;Lactobacillaceae;Ligilactobacillus;Ligilactobacillus_murinus
k127_3775609	2817	db_customA	S	CP097561.1	100	416	2817	0	4436	2817	CP097561.1 Ligilactobacillus murinus ASF361 chromosome; complete genome	85.268	1	Bacteria;Firmicutes;Bacilli;Lactobacillales;Lactobacillaceae;Ligilactobacillus;Ligilactobacillus_murinus
k127_382243	1338	db_customA	S	CP097561.1	100	1	1338	0	2471	1338	CP097561.1 Ligilactobacillus murinus ASF361 chromosome; complete genome	100	1	Bacteria;Firmicutes;Bacilli;Lactobacillales;Lactobacillaceae;Ligilactobacillus;Ligilactobacillus_murinus
k127_4133950	30987	db_customA	S	CP097561.1	99.985	4800	30987	0	48339	30987	CP097561.1 Ligilactobacillus murinus ASF361 chromosome; complete genome	84.5129	1	Bacteria;Firmicutes;Bacilli;Lactobacillales;Lactobacillaceae;Ligilactobacillus;Ligilactobacillus_murinus
k127_4144104	543	db_customA	S	CP097561.1	98.711	1	543	0	965	543	CP097561.1 Ligilactobacillus murinus ASF361 chromosome; complete genome	100	1	Bacteria;Firmicutes;Bacilli;Lactobacillales;Lactobacillaceae;Ligilactobacillus;Ligilactobacillus_murinus
k127_4232058	14968	db_customA	S	JACBXZ010000073.1	99.939	1	14750	0	27189	14968	JACBXZ010000073.1 Ligilactobacillus murinus strain LAC NODE_50_length_14757_cov_17.1042_ID_99; whole genome shotgun sequence	98.5436	1	Bacteria;Firmicutes;Bacilli;Lactobacillales;Lactobacillaceae;Ligilactobacillus;Ligilactobacillus_murinus
k127_4238236	559	db_customA	S	CP023565.1	99.463	1	559	0	1016	559	CP023565.1 Ligilactobacillus murinus strain CR147 chromosome; complete genome	100	1	Bacteria;Firmicutes;Bacilli;Lactobacillales;Lactobacillaceae;Ligilactobacillus;Ligilactobacillus_murinus
k127_4325564	559	db_customA	S	JACBXZ010000121.1	100	1	559	0	1033	559	JACBXZ010000121.1 Ligilactobacillus murinus strain LAC NODE_82_length_5469_cov_68.4444_ID_163; whole genome shotgun sequence	100	1	Bacteria;Firmicutes;Bacilli;Lactobacillales;Lactobacillaceae;Ligilactobacillus;Ligilactobacillus_murinus
k127_4327683	471	db_customA	S	VIQY01000038.1	100	1	471	0	870	471	VIQY01000038.1 Ligilactobacillus murinus strain MD040 7_Assembly.final.scaffolds_scaffold73.1; whole genome shotgun sequence	100	1	Bacteria;Firmicutes;Bacilli;Lactobacillales;Lactobacillaceae;Ligilactobacillus;Ligilactobacillus_murinus
k127_4327877	6574	db_customA	S	JACBXZ010000116.1	99.97	7	6574	0	12118	6574	JACBXZ010000116.1 Ligilactobacillus murinus strain LAC NODE_72_length_7153_cov_32.811_ID_143; whole genome shotgun sequence	99.9087	1	Bacteria;Firmicutes;Bacilli;Lactobacillales;Lactobacillaceae;Ligilactobacillus;Ligilactobacillus_murinus
k127_4335974	607	db_customA	S	CP097561.1	100	1	607	0	1122	607	CP097561.1 Ligilactobacillus murinus ASF361 chromosome; complete genome	100	1	Bacteria;Firmicutes;Bacilli;Lactobacillales;Lactobacillaceae;Ligilactobacillus;Ligilactobacillus_murinus
k127_4391897	3460	db_customA	S	VIQY01000065.1	100	1	3460	0	6390	3460	VIQY01000065.1 Ligilactobacillus murinus strain MD040 7_Assembly.final.scaffolds_scaffold83.1; whole genome shotgun sequence	100	1	Bacteria;Firmicutes;Bacilli;Lactobacillales;Lactobacillaceae;Ligilactobacillus;Ligilactobacillus_murinus
k127_4438367	287	db_customA	S	CP023565.1	100	1	287	1.18e-148	531	287	CP023565.1 Ligilactobacillus murinus strain CR147 chromosome; complete genome	100	1	Bacteria;Firmicutes;Bacilli;Lactobacillales;Lactobacillaceae;Ligilactobacillus;Ligilactobacillus_murinus
k127_4510706	432	db_customA	S	CP097561.1	100	1	432	0	798	432	CP097561.1 Ligilactobacillus murinus ASF361 chromosome; complete genome	100	1	Bacteria;Firmicutes;Bacilli;Lactobacillales;Lactobacillaceae;Ligilactobacillus;Ligilactobacillus_murinus
k127_459781	4935	db_customA	S	JACBXZ010000017.1	99.411	14	4935	0	8929	4935	JACBXZ010000017.1 Ligilactobacillus murinus strain LAC NODE_77_length_5954_cov_23.0899_ID_153; whole genome shotgun sequence	99.7366	1	Bacteria;Firmicutes;Bacilli;Lactobacillales;Lactobacillaceae;Ligilactobacillus;Ligilactobacillus_murinus
k127_460709	16415	db_customA	S	VIQY01000052.1	99.994	1	16289	0	30075	16415	VIQY01000052.1 Ligilactobacillus murinus strain MD040 7_Assembly.final.scaffolds_scaffold18.1; whole genome shotgun sequence	99.2324	1	Bacteria;Firmicutes;Bacilli;Lactobacillales;Lactobacillaceae;Ligilactobacillus;Ligilactobacillus_murinus
k127_465250	51152	db_customA	S	VIQY01000082.1	99.996	1	50842	0	93877	51152	VIQY01000082.1 Ligilactobacillus murinus strain MD040 7_Assembly.final.scaffolds_scaffold4.1; whole genome shotgun sequence	99.394	1	Bacteria;Firmicutes;Bacilli;Lactobacillales;Lactobacillaceae;Ligilactobacillus;Ligilactobacillus_murinus
k127_4711915	726	db_customA	S	CP097561.1	100	1	522	0	965	726	CP097561.1 Ligilactobacillus murinus ASF361 chromosome; complete genome	71.9008	1	Bacteria;Firmicutes;Bacilli;Lactobacillales;Lactobacillaceae;Ligilactobacillus;Ligilactobacillus_murinus
k127_4738449	648	db_customA	S	CP097561.1	100	1	648	0	1197	648	CP097561.1 Ligilactobacillus murinus ASF361 chromosome; complete genome	100	1	Bacteria;Firmicutes;Bacilli;Lactobacillales;Lactobacillaceae;Ligilactobacillus;Ligilactobacillus_murinus
k127_4810736	7751	db_customA	S	VIQY01000085.1	99.987	163	7751	0	14007	7751	VIQY01000085.1 Ligilactobacillus murinus strain MD040 7_Assembly.final.scaffolds_scaffold53.1; whole genome shotgun sequence	97.9099	2	Bacteria;Firmicutes;Bacilli;Lactobacillales;Lactobacillaceae;Ligilactobacillus;Ligilactobacillus_murinus
k127_4812233	955	db_customA	S	CP097561.1	99.791	1	955	0	1753	955	CP097561.1 Ligilactobacillus murinus ASF361 chromosome; complete genome	100	1	Bacteria;Firmicutes;Bacilli;Lactobacillales;Lactobacillaceae;Ligilactobacillus;Ligilactobacillus_murinus
k127_484210	1113	db_customA	S	CP097561.1	99.102	1	1113	0	2001	1113	CP097561.1 Ligilactobacillus murinus ASF361 chromosome; complete genome	100	1	Bacteria;Firmicutes;Bacilli;Lactobacillales;Lactobacillaceae;Ligilactobacillus;Ligilactobacillus_murinus
k127_485256	4359	db_customA	S	CP097561.1	100	1	4359	0	8050	4359	CP097561.1 Ligilactobacillus murinus ASF361 chromosome; complete genome	100	1	Bacteria;Firmicutes;Bacilli;Lactobacillales;Lactobacillaceae;Ligilactobacillus;Ligilactobacillus_murinus
k127_4884146	797	db_customA	S	JACBXZ010000005.1	97.354	609	797	2.29e-85	322	797	JACBXZ010000005.1 Ligilactobacillus murinus strain LAC NODE_20_length_29716_cov_15.1143_ID_39; whole genome shotgun sequence	23.7139	1	Bacteria;Firmicutes;Bacilli;Lactobacillales;Lactobacillaceae;Ligilactobacillus;Ligilactobacillus_murinus
k127_4934264	922	db_customA	S	CP097561.1	99.241	1	922	0	1664	922	CP097561.1 Ligilactobacillus murinus ASF361 chromosome; complete genome	100	1	Bacteria;Firmicutes;Bacilli;Lactobacillales;Lactobacillaceae;Ligilactobacillus;Ligilactobacillus_murinus
k127_4954160	20132	db_customA	S	CP097561.1	99.99	1	20132	0	37166	20132	CP097561.1 Ligilactobacillus murinus ASF361 chromosome; complete genome	100	1	Bacteria;Firmicutes;Bacilli;Lactobacillales;Lactobacillaceae;Ligilactobacillus;Ligilactobacillus_murinus
k127_4957871	1924	db_customA	S	VIQY01000024.1	99.948	1	1924	0	3548	1924	VIQY01000024.1 Ligilactobacillus murinus strain MD040 7_Assembly.final.scaffolds_scaffold48.1; whole genome shotgun sequence	100	1	Bacteria;Firmicutes;Bacilli;Lactobacillales;Lactobacillaceae;Ligilactobacillus;Ligilactobacillus_murinus
k127_4992769	3126	db_customA	S	VIQY01000049.1	100	1	3126	0	5773	3126	VIQY01000049.1 Ligilactobacillus murinus strain MD040 7_Assembly.final.scaffolds_scaffold12.1; whole genome shotgun sequence	100	1	Bacteria;Firmicutes;Bacilli;Lactobacillales;Lactobacillaceae;Ligilactobacillus;Ligilactobacillus_murinus
k127_5080735	8464	db_customA	S	CP097561.1	99.797	104	8464	0	15346	8464	CP097561.1 Ligilactobacillus murinus ASF361 chromosome; complete genome	98.7831	1	Bacteria;Firmicutes;Bacilli;Lactobacillales;Lactobacillaceae;Ligilactobacillus;Ligilactobacillus_murinus
k127_5265374	383	db_customA	S	CP097561.1	100	1	383	0	708	383	CP097561.1 Ligilactobacillus murinus ASF361 chromosome; complete genome	100	1	Bacteria;Firmicutes;Bacilli;Lactobacillales;Lactobacillaceae;Ligilactobacillus;Ligilactobacillus_murinus
k127_5273093	1375	db_customA	S	CP097561.1	100	1	1375	0	2540	1375	CP097561.1 Ligilactobacillus murinus ASF361 chromosome; complete genome	100	1	Bacteria;Firmicutes;Bacilli;Lactobacillales;Lactobacillaceae;Ligilactobacillus;Ligilactobacillus_murinus
k127_5286257	40325	db_customA	S	JACBXZ010000048.1	99.993	142	27477	0	50470	40325	JACBXZ010000048.1 Ligilactobacillus murinus strain LAC NODE_22_length_27757_cov_22.6855_ID_43; whole genome shotgun sequence	67.7892	1	Bacteria;Firmicutes;Bacilli;Lactobacillales;Lactobacillaceae;Ligilactobacillus;Ligilactobacillus_murinus
k127_5287444	21805	db_customA	S	VIQY01000091.1	99.995	1	21682	0	40034	21805	VIQY01000091.1 Ligilactobacillus murinus strain MD040 7_Assembly.final.scaffolds_scaffold29.1; whole genome shotgun sequence	99.4359	1	Bacteria;Firmicutes;Bacilli;Lactobacillales;Lactobacillaceae;Ligilactobacillus;Ligilactobacillus_murinus
k127_5289804	15084	db_customA	S	VIQY01000052.1	100	126	15084	0	27625	15084	VIQY01000052.1 Ligilactobacillus murinus strain MD040 7_Assembly.final.scaffolds_scaffold18.1; whole genome shotgun sequence	99.1713	1	Bacteria;Firmicutes;Bacilli;Lactobacillales;Lactobacillaceae;Ligilactobacillus;Ligilactobacillus_murinus
k127_5321369	4175	db_customA	S	CP097561.1	98.802	1	4175	0	7432	4175	CP097561.1 Ligilactobacillus murinus ASF361 chromosome; complete genome	100	1	Bacteria;Firmicutes;Bacilli;Lactobacillales;Lactobacillaceae;Ligilactobacillus;Ligilactobacillus_murinus
k127_5389459	883	db_customA	S	CP097561.1	99.624	86	883	0	1458	883	CP097561.1 Ligilactobacillus murinus ASF361 chromosome; complete genome	90.3737	1	Bacteria;Firmicutes;Bacilli;Lactobacillales;Lactobacillaceae;Ligilactobacillus;Ligilactobacillus_murinus
k127_5484980	3331	db_customA	S	VIQY01000047.1	98.799	1	1744	0	3109	3331	VIQY01000047.1 Ligilactobacillus murinus strain MD040 7_Assembly.final.scaffolds_scaffold94.1; whole genome shotgun sequence	52.5068	1	Bacteria;Firmicutes;Bacilli;Lactobacillales;Lactobacillaceae;Ligilactobacillus;Ligilactobacillus_murinus
k127_5635764	7991	db_customA	S	VIQY01000013.1	99.837	1	7991	0	14685	7991	VIQY01000013.1 Ligilactobacillus murinus strain MD040 7_Assembly.final.scaffolds_scaffold6.1; whole genome shotgun sequence	100	1	Bacteria;Firmicutes;Bacilli;Lactobacillales;Lactobacillaceae;Ligilactobacillus;Ligilactobacillus_murinus
k127_5645840	2335	db_customA	S	VIQY01000040.1	99.615	1	2335	0	4263	2335	VIQY01000040.1 Ligilactobacillus murinus strain MD040 7_Assembly.final.scaffolds_scaffold54.1; whole genome shotgun sequence	100	1	Bacteria;Firmicutes;Bacilli;Lactobacillales;Lactobacillaceae;Ligilactobacillus;Ligilactobacillus_murinus
k127_5647475	15080	db_customA	S	VIQY01000015.1	99.993	1	15080	0	27843	15080	VIQY01000015.1 Ligilactobacillus murinus strain MD040 7_Assembly.final.scaffolds_scaffold9.1; whole genome shotgun sequence	100	1	Bacteria;Firmicutes;Bacilli;Lactobacillales;Lactobacillaceae;Ligilactobacillus;Ligilactobacillus_murinus
k127_5730507	17468	db_customA	S	JACBXZ010000064.1	99.948	1	17382	0	32047	17468	JACBXZ010000064.1 Ligilactobacillus murinus strain LAC NODE_41_length_18657_cov_17.5198_ID_81; whole genome shotgun sequence	99.5077	1	Bacteria;Firmicutes;Bacilli;Lactobacillales;Lactobacillaceae;Ligilactobacillus;Ligilactobacillus_murinus
k127_5742650	92448	db_customA	S	CP097561.1	99.99	1	92448	0	170700	92448	CP097561.1 Ligilactobacillus murinus ASF361 chromosome; complete genome	100	1	Bacteria;Firmicutes;Bacilli;Lactobacillales;Lactobacillaceae;Ligilactobacillus;Ligilactobacillus_murinus
k127_5759887	33670	db_customA	S	VIQY01000077.1	100	16715	33670	0	31312	33670	VIQY01000077.1 Ligilactobacillus murinus strain MD040 7_Assembly.final.scaffolds_scaffold44.1; whole genome shotgun sequence	50.3594	1	Bacteria;Firmicutes;Bacilli;Lactobacillales;Lactobacillaceae;Ligilactobacillus;Ligilactobacillus_murinus
k127_5795650	2806	db_customA	S	VIQY01000038.1	99.964	1	2806	0	5177	2806	VIQY01000038.1 Ligilactobacillus murinus strain MD040 7_Assembly.final.scaffolds_scaffold73.1; whole genome shotgun sequence	100	1	Bacteria;Firmicutes;Bacilli;Lactobacillales;Lactobacillaceae;Ligilactobacillus;Ligilactobacillus_murinus
k127_5935739	7279	db_customA	S	VIQY01000008.1	99.735	94	7274	0	13156	7279	VIQY01000008.1 Ligilactobacillus murinus strain MD040 7_Assembly.final.scaffolds_scaffold15.1; whole genome shotgun sequence	98.6537	1	Bacteria;Firmicutes;Bacilli;Lactobacillales;Lactobacillaceae;Ligilactobacillus;Ligilactobacillus_murinus
k127_5945345	36372	db_customA	S	VIQY01000041.1	99.996	1	23892	0	44115	36372	VIQY01000041.1 Ligilactobacillus murinus strain MD040 7_Assembly.final.scaffolds_scaffold31.1; whole genome shotgun sequence	65.6879	1	Bacteria;Firmicutes;Bacilli;Lactobacillales;Lactobacillaceae;Ligilactobacillus;Ligilactobacillus_murinus
k127_5947972	16904	db_customA	S	JACBXZ010000113.1	100	1	16904	0	31216	16904	JACBXZ010000113.1 Ligilactobacillus murinus strain LAC NODE_24_length_25417_cov_21.71_ID_47; whole genome shotgun sequence	100	1	Bacteria;Firmicutes;Bacilli;Lactobacillales;Lactobacillaceae;Ligilactobacillus;Ligilactobacillus_murinus
k127_5958675	8214	db_customA	S	VIQY01000034.1	99.939	1	8214	0	15145	8214	VIQY01000034.1 Ligilactobacillus murinus strain MD040 7_Assembly.final.scaffolds_scaffold30.1; whole genome shotgun sequence	100	1	Bacteria;Firmicutes;Bacilli;Lactobacillales;Lactobacillaceae;Ligilactobacillus;Ligilactobacillus_murinus
k127_5958678	39543	db_customA	S	VIQY01000070.1	100	1	39543	0	73023	39543	VIQY01000070.1 Ligilactobacillus murinus strain MD040 7_Assembly.final.scaffolds_scaffold14.1; whole genome shotgun sequence	100	1	Bacteria;Firmicutes;Bacilli;Lactobacillales;Lactobacillaceae;Ligilactobacillus;Ligilactobacillus_murinus
k127_5969324	55767	db_customA	S	VIQY01000005.1	99.959	1	55767	0	102900	55767	VIQY01000005.1 Ligilactobacillus murinus strain MD040 7_Assembly.final.scaffolds_scaffold5.1; whole genome shotgun sequence	100	1	Bacteria;Firmicutes;Bacilli;Lactobacillales;Lactobacillaceae;Ligilactobacillus;Ligilactobacillus_murinus
k127_5973504	7755	db_customA	S	CP097561.1	99.974	1	7755	0	14310	7755	CP097561.1 Ligilactobacillus murinus ASF361 chromosome; complete genome	100	1	Bacteria;Firmicutes;Bacilli;Lactobacillales;Lactobacillaceae;Ligilactobacillus;Ligilactobacillus_murinus
k127_611319	34678	db_customA	S	VIQY01000059.1	100	1	34678	0	64039	34678	VIQY01000059.1 Ligilactobacillus murinus strain MD040 7_Assembly.final.scaffolds_scaffold19.1; whole genome shotgun sequence	100	1	Bacteria;Firmicutes;Bacilli;Lactobacillales;Lactobacillaceae;Ligilactobacillus;Ligilactobacillus_murinus
k127_6119303	1234	db_customA	S	CP097561.1	100	1	1234	0	2279	1234	CP097561.1 Ligilactobacillus murinus ASF361 chromosome; complete genome	100	1	Bacteria;Firmicutes;Bacilli;Lactobacillales;Lactobacillaceae;Ligilactobacillus;Ligilactobacillus_murinus
k127_616694	24579	db_customA	S	VIQY01000022.1	99.996	1	24579	0	45384	24579	VIQY01000022.1 Ligilactobacillus murinus strain MD040 7_Assembly.final.scaffolds_scaffold11.1; whole genome shotgun sequence	100	1	Bacteria;Firmicutes;Bacilli;Lactobacillales;Lactobacillaceae;Ligilactobacillus;Ligilactobacillus_murinus
k127_617055	12531	db_customA	S	JACBXZ010000101.1	99.992	1	12531	0	23135	12531	JACBXZ010000101.1 Ligilactobacillus murinus strain LAC NODE_1_length_105282_cov_16.5045_ID_1; whole genome shotgun sequence	100	1	Bacteria;Firmicutes;Bacilli;Lactobacillales;Lactobacillaceae;Ligilactobacillus;Ligilactobacillus_murinus
k127_6175990	20253	db_customA	S	VIQY01000078.1	100	1	20253	0	37401	20253	VIQY01000078.1 Ligilactobacillus murinus strain MD040 7_Assembly.final.scaffolds_scaffold39.1; whole genome shotgun sequence	100	1	Bacteria;Firmicutes;Bacilli;Lactobacillales;Lactobacillaceae;Ligilactobacillus;Ligilactobacillus_murinus
k127_6187659	22277	db_customA	S	CP097561.1	99.876	3599	22146	0	34123	22277	CP097561.1 Ligilactobacillus murinus ASF361 chromosome; complete genome	83.2742	2	Bacteria;Firmicutes;Bacilli;Lactobacillales;Lactobacillaceae;Ligilactobacillus;Ligilactobacillus_murinus
k127_6221647	1795	db_customA	S	CP097561.1	99.666	1	1795	0	3282	1795	CP097561.1 Ligilactobacillus murinus ASF361 chromosome; complete genome	100	1	Bacteria;Firmicutes;Bacilli;Lactobacillales;Lactobacillaceae;Ligilactobacillus;Ligilactobacillus_murinus
k127_629756	19190	db_customA	S	VIQY01000058.1	99.995	1	19190	0	35432	19190	VIQY01000058.1 Ligilactobacillus murinus strain MD040 7_Assembly.final.scaffolds_scaffold40.1; whole genome shotgun sequence	100	1	Bacteria;Firmicutes;Bacilli;Lactobacillales;Lactobacillaceae;Ligilactobacillus;Ligilactobacillus_murinus
k127_630733	13240	db_customA	S	CP097561.1	99.992	1	13240	0	24445	13240	CP097561.1 Ligilactobacillus murinus ASF361 chromosome; complete genome	100	1	Bacteria;Firmicutes;Bacilli;Lactobacillales;Lactobacillaceae;Ligilactobacillus;Ligilactobacillus_murinus
k127_6317276	33055	db_customA	S	JACBXZ010000059.1	99.973	1	33055	0	60990	33055	JACBXZ010000059.1 Ligilactobacillus murinus strain LAC NODE_17_length_33085_cov_17.7938_ID_33; whole genome shotgun sequence	100	1	Bacteria;Firmicutes;Bacilli;Lactobacillales;Lactobacillaceae;Ligilactobacillus;Ligilactobacillus_murinus
k127_6380147	22744	db_customA	S	VIQY01000007.1	99.991	126	22744	0	41759	22744	VIQY01000007.1 Ligilactobacillus murinus strain MD040 7_Assembly.final.scaffolds_scaffold10.1; whole genome shotgun sequence	99.4548	1	Bacteria;Firmicutes;Bacilli;Lactobacillales;Lactobacillaceae;Ligilactobacillus;Ligilactobacillus_murinus
k127_6448472	20307	db_customA	S	VIQY01000057.1	100	1	20307	0	37501	20307	VIQY01000057.1 Ligilactobacillus murinus strain MD040 7_Assembly.final.scaffolds_scaffold38.1; whole genome shotgun sequence	100	1	Bacteria;Firmicutes;Bacilli;Lactobacillales;Lactobacillaceae;Ligilactobacillus;Ligilactobacillus_murinus
k127_6542646	2324	db_customA	S	CP097561.1	100	1	2324	0	4292	2324	CP097561.1 Ligilactobacillus murinus ASF361 chromosome; complete genome	100	1	Bacteria;Firmicutes;Bacilli;Lactobacillales;Lactobacillaceae;Ligilactobacillus;Ligilactobacillus_murinus
k127_6714046	22166	db_customA	S	JACBXZ010000095.1	99.995	1	22166	0	40928	22166	JACBXZ010000095.1 Ligilactobacillus murinus strain LAC NODE_33_length_22380_cov_19.7364_ID_65; whole genome shotgun sequence	100	1	Bacteria;Firmicutes;Bacilli;Lactobacillales;Lactobacillaceae;Ligilactobacillus;Ligilactobacillus_murinus
k127_680140	17557	db_customA	S	JACBXZ010000122.1	99.989	1	17432	0	32180	17557	JACBXZ010000122.1 Ligilactobacillus murinus strain LAC NODE_15_length_38470_cov_16.9739_ID_29; whole genome shotgun sequence	99.288	1	Bacteria;Firmicutes;Bacilli;Lactobacillales;Lactobacillaceae;Ligilactobacillus;Ligilactobacillus_murinus
k127_680930	21342	db_customA	S	CP097561.1	99.756	1	21329	0	39100	21342	CP097561.1 Ligilactobacillus murinus ASF361 chromosome; complete genome	99.9438	1	Bacteria;Firmicutes;Bacilli;Lactobacillales;Lactobacillaceae;Ligilactobacillus;Ligilactobacillus_murinus
k127_698557	1170	db_customA	S	CP097561.1	98.565	1	1045	0	1847	1170	CP097561.1 Ligilactobacillus murinus ASF361 chromosome; complete genome	89.3162	1	Bacteria;Firmicutes;Bacilli;Lactobacillales;Lactobacillaceae;Ligilactobacillus;Ligilactobacillus_murinus
k127_718343	385	db_customA	S	CP097561.1	98.182	1	385	0	673	385	CP097561.1 Ligilactobacillus murinus ASF361 chromosome; complete genome	100	1	Bacteria;Firmicutes;Bacilli;Lactobacillales;Lactobacillaceae;Ligilactobacillus;Ligilactobacillus_murinus
k127_765000	5393	db_customA	S	JACBXZ010000122.1	99.981	1	5393	0	9954	5393	JACBXZ010000122.1 Ligilactobacillus murinus strain LAC NODE_15_length_38470_cov_16.9739_ID_29; whole genome shotgun sequence	100	1	Bacteria;Firmicutes;Bacilli;Lactobacillales;Lactobacillaceae;Ligilactobacillus;Ligilactobacillus_murinus
k127_865300	539	db_customA	S	CP097561.1	100	1	539	0	996	539	CP097561.1 Ligilactobacillus murinus ASF361 chromosome; complete genome	100	1	Bacteria;Firmicutes;Bacilli;Lactobacillales;Lactobacillaceae;Ligilactobacillus;Ligilactobacillus_murinus
k127_866127	24154	db_customA	S	VIQY01000039.1	99.826	1	18995	0	34895	24154	VIQY01000039.1 Ligilactobacillus murinus strain MD040 7_Assembly.final.scaffolds_scaffold21.1; whole genome shotgun sequence	78.6454	1	Bacteria;Firmicutes;Bacilli;Lactobacillales;Lactobacillaceae;Ligilactobacillus;Ligilactobacillus_murinus
k127_3506210	1788	nt	S	CP016687.1	99.664	1	1788	0	3269	1788	CP016687.1 Lactococcus lactis subsp. cremoris strain 158 plasmid p158C; complete sequence	100	1	Bacteria;Firmicutes;Bacilli;Lactobacillales;Streptococcaceae;Lactococcus;Lactococcus_cremoris
k127_7170001	10503	nt	S	CP016737.1	99.439	4263	6933	0	4850	10503	CP016737.1 Lactococcus lactis subsp. cremoris strain JM3 plasmid pJM3A; complete sequence	25.4404	2	Bacteria;Firmicutes;Bacilli;Lactobacillales;Streptococcaceae;Lactococcus;Lactococcus_cremoris
k127_852646	561	nt	S	CP015899.1	99.465	1	561	0	1020	561	CP015899.1 Lactococcus cremoris strain JM1 chromosome; complete genome	100	1	Bacteria;Firmicutes;Bacilli;Lactobacillales;Streptococcaceae;Lactococcus;Lactococcus_cremoris
k127_921670	577	nt	S	CP016745.1	98.122	1	212	1.06e-97	370	577	CP016745.1 Lactococcus lactis subsp. cremoris strain JM2 plasmid pMPJM2; complete sequence	36.9151	1	Bacteria;Firmicutes;Bacilli;Lactobacillales;Streptococcaceae;Lactococcus;Lactococcus_cremoris
k127_2195623	1316	nt	S	CP066003.1	99.62	1	1316	0	2403	1316	CP066003.1 Lactococcus garvieae strain FDAARGOS_1002 chromosome; complete genome	100	1	Bacteria;Firmicutes;Bacilli;Lactobacillales;Streptococcaceae;Lactococcus;Lactococcus_garvieae
k127_5958338	2030	nt	S	CP066004.1	99.803	1	2030	0	3727	2030	CP066004.1 Lactococcus garvieae strain FDAARGOS_1002 plasmid unnamed4	100	1	Bacteria;Firmicutes;Bacilli;Lactobacillales;Streptococcaceae;Lactococcus;Lactococcus_garvieae
k127_1015986	856	nt	S	AE005176.1	99.883	1	856	0	1576	856	AE005176.1 Lactococcus lactis subsp. lactis Il1403; complete genome	100	1	Bacteria;Firmicutes;Bacilli;Lactobacillales;Streptococcaceae;Lactococcus;Lactococcus_lactis
k127_1021023	385	nt	S	AE005176.1	100	1	385	0	712	385	AE005176.1 Lactococcus lactis subsp. lactis Il1403; complete genome	100	1	Bacteria;Firmicutes;Bacilli;Lactobacillales;Streptococcaceae;Lactococcus;Lactococcus_lactis
k127_103174	1373	nt	S	CP002365.1	100	1	1373	0	2536	1373	CP002365.1 Lactococcus lactis subsp. lactis CV56; complete genome	100	1	Bacteria;Firmicutes;Bacilli;Lactobacillales;Streptococcaceae;Lactococcus;Lactococcus_lactis
k127_106866	1845	nt	S	CP084190.1	99.783	1	1845	0	3386	1845	CP084190.1 Lactococcus lactis strain FDAARGOS_867 plasmid unnamed2	100	1	Bacteria;Firmicutes;Bacilli;Lactobacillales;Streptococcaceae;Lactococcus;Lactococcus_lactis
k127_1073330	1004	db_customA	S	CP033607.1	100	1	1004	0	1855	1004	CP033607.1 Lactococcus lactis strain IL1403 chromosome	100	1	Bacteria;Firmicutes;Bacilli;Lactobacillales;Streptococcaceae;Lactococcus;Lactococcus_lactis
k127_1106825	971	nt	S	CP006766.1	100	1	971	0	1794	971	CP006766.1 Lactococcus lactis subsp. lactis KLDS 4.0325 chromosome; complete genome	100	1	Bacteria;Firmicutes;Bacilli;Lactobacillales;Streptococcaceae;Lactococcus;Lactococcus_lactis
k127_1108992	470	nt	S	AE005176.1	99.574	1	470	0	857	470	AE005176.1 Lactococcus lactis subsp. lactis Il1403; complete genome	100	1	Bacteria;Firmicutes;Bacilli;Lactobacillales;Streptococcaceae;Lactococcus;Lactococcus_lactis
k127_1120777	466	nt	S	AE005176.1	100	1	466	0	861	466	AE005176.1 Lactococcus lactis subsp. lactis Il1403; complete genome	100	1	Bacteria;Firmicutes;Bacilli;Lactobacillales;Streptococcaceae;Lactococcus;Lactococcus_lactis
k127_1122324	1040	nt	S	CP015895.1	99.615	1	1038	0	1895	1040	CP015895.1 Lactococcus lactis subsp. lactis strain 184; complete genome	99.8077	1	Bacteria;Firmicutes;Bacilli;Lactobacillales;Streptococcaceae;Lactococcus;Lactococcus_lactis
k127_1128209	850	nt	S	AE005176.1	99.765	1	850	0	1559	850	AE005176.1 Lactococcus lactis subsp. lactis Il1403; complete genome	100	1	Bacteria;Firmicutes;Bacilli;Lactobacillales;Streptococcaceae;Lactococcus;Lactococcus_lactis
k127_1131441	732	nt	S	AE005176.1	98.358	1	731	0	1284	732	AE005176.1 Lactococcus lactis subsp. lactis Il1403; complete genome	99.8634	1	Bacteria;Firmicutes;Bacilli;Lactobacillales;Streptococcaceae;Lactococcus;Lactococcus_lactis
k127_1151040	1210	nt	S	CP002365.1	99.835	1	1210	0	2224	1210	CP002365.1 Lactococcus lactis subsp. lactis CV56; complete genome	100	1	Bacteria;Firmicutes;Bacilli;Lactobacillales;Streptococcaceae;Lactococcus;Lactococcus_lactis
k127_115666	677	nt	S	AE005176.1	100	1	677	0	1251	677	AE005176.1 Lactococcus lactis subsp. lactis Il1403; complete genome	100	1	Bacteria;Firmicutes;Bacilli;Lactobacillales;Streptococcaceae;Lactococcus;Lactococcus_lactis
k127_1172323	796	nt	S	AE005176.1	100	1	796	0	1471	796	AE005176.1 Lactococcus lactis subsp. lactis Il1403; complete genome	100	1	Bacteria;Firmicutes;Bacilli;Lactobacillales;Streptococcaceae;Lactococcus;Lactococcus_lactis
k127_1181364	798	nt	S	AE005176.1	99.875	1	798	0	1469	798	AE005176.1 Lactococcus lactis subsp. lactis Il1403; complete genome	100	1	Bacteria;Firmicutes;Bacilli;Lactobacillales;Streptococcaceae;Lactococcus;Lactococcus_lactis
k127_1196296	1190	db_customA	S	CP033607.1	99.916	1	1190	0	2193	1190	CP033607.1 Lactococcus lactis strain IL1403 chromosome	100	1	Bacteria;Firmicutes;Bacilli;Lactobacillales;Streptococcaceae;Lactococcus;Lactococcus_lactis
k127_1208853	680	nt	S	AE005176.1	100	1	680	0	1256	680	AE005176.1 Lactococcus lactis subsp. lactis Il1403; complete genome	100	1	Bacteria;Firmicutes;Bacilli;Lactobacillales;Streptococcaceae;Lactococcus;Lactococcus_lactis
k127_1210648	898	nt	S	CP006766.1	99.889	1	898	0	1653	898	CP006766.1 Lactococcus lactis subsp. lactis KLDS 4.0325 chromosome; complete genome	100	1	Bacteria;Firmicutes;Bacilli;Lactobacillales;Streptococcaceae;Lactococcus;Lactococcus_lactis
k127_1226512	1054	nt	S	CP009472.1	99.534	198	1054	0	1561	1054	CP009472.1 Lactococcus lactis strain AI06; complete genome	81.4042	1	Bacteria;Firmicutes;Bacilli;Lactobacillales;Streptococcaceae;Lactococcus;Lactococcus_lactis
k127_1230906	565	nt	S	AE005176.1	100	1	565	0	1044	565	AE005176.1 Lactococcus lactis subsp. lactis Il1403; complete genome	100	1	Bacteria;Firmicutes;Bacilli;Lactobacillales;Streptococcaceae;Lactococcus;Lactococcus_lactis
k127_1248321	752	db_customA	S	CP033607.1	99.867	1	752	0	1384	752	CP033607.1 Lactococcus lactis strain IL1403 chromosome	100	1	Bacteria;Firmicutes;Bacilli;Lactobacillales;Streptococcaceae;Lactococcus;Lactococcus_lactis
k127_1250648	1331	nt	S	CP015895.1	99.775	1	1331	0	2442	1331	CP015895.1 Lactococcus lactis subsp. lactis strain 184; complete genome	100	1	Bacteria;Firmicutes;Bacilli;Lactobacillales;Streptococcaceae;Lactococcus;Lactococcus_lactis
k127_1270728	427	nt	S	AE005176.1	99.494	33	427	0	719	427	AE005176.1 Lactococcus lactis subsp. lactis Il1403; complete genome	92.5059	1	Bacteria;Firmicutes;Bacilli;Lactobacillales;Streptococcaceae;Lactococcus;Lactococcus_lactis
k127_1276372	1098	nt	S	CP015908.1	99.634	1	1092	0	1995	1098	CP015908.1 Lactococcus lactis subsp. lactis strain UL8; complete genome	99.4536	1	Bacteria;Firmicutes;Bacilli;Lactobacillales;Streptococcaceae;Lactococcus;Lactococcus_lactis
k127_1287475	499	nt	S	AE005176.1	100	1	499	0	922	499	AE005176.1 Lactococcus lactis subsp. lactis Il1403; complete genome	100	1	Bacteria;Firmicutes;Bacilli;Lactobacillales;Streptococcaceae;Lactococcus;Lactococcus_lactis
k127_1288528	760	nt	S	CP015895.1	100	1	760	0	1404	760	CP015895.1 Lactococcus lactis subsp. lactis strain 184; complete genome	100	1	Bacteria;Firmicutes;Bacilli;Lactobacillales;Streptococcaceae;Lactococcus;Lactococcus_lactis
k127_131419	633	nt	S	AE005176.1	100	1	633	0	1170	633	AE005176.1 Lactococcus lactis subsp. lactis Il1403; complete genome	100	1	Bacteria;Firmicutes;Bacilli;Lactobacillales;Streptococcaceae;Lactococcus;Lactococcus_lactis
k127_1336841	790	nt	S	AE005176.1	100	1	790	0	1459	790	AE005176.1 Lactococcus lactis subsp. lactis Il1403; complete genome	100	1	Bacteria;Firmicutes;Bacilli;Lactobacillales;Streptococcaceae;Lactococcus;Lactococcus_lactis
k127_1369092	1085	nt	S	AE005176.1	99.908	1	1085	0	1999	1085	AE005176.1 Lactococcus lactis subsp. lactis Il1403; complete genome	100	1	Bacteria;Firmicutes;Bacilli;Lactobacillales;Streptococcaceae;Lactococcus;Lactococcus_lactis
k127_1376297	645	nt	S	CP015896.1	99.38	1	645	0	1170	645	CP015896.1 Lactococcus lactis subsp. lactis strain 229; complete genome	100	1	Bacteria;Firmicutes;Bacilli;Lactobacillales;Streptococcaceae;Lactococcus;Lactococcus_lactis
k127_1380994	1170	db_customA	S	CP033607.1	99.829	1	1170	0	2150	1170	CP033607.1 Lactococcus lactis strain IL1403 chromosome	100	1	Bacteria;Firmicutes;Bacilli;Lactobacillales;Streptococcaceae;Lactococcus;Lactococcus_lactis
k127_138126	909	nt	S	AE005176.1	98.018	2	909	0	1578	909	AE005176.1 Lactococcus lactis subsp. lactis Il1403; complete genome	99.89	1	Bacteria;Firmicutes;Bacilli;Lactobacillales;Streptococcaceae;Lactococcus;Lactococcus_lactis
k127_1384375	1448	nt	S	CP084190.1	99.517	1	1448	0	2636	1448	CP084190.1 Lactococcus lactis strain FDAARGOS_867 plasmid unnamed2	100	1	Bacteria;Firmicutes;Bacilli;Lactobacillales;Streptococcaceae;Lactococcus;Lactococcus_lactis
k127_1388625	1771	nt	S	CP002365.1	99.887	1	1771	0	3260	1771	CP002365.1 Lactococcus lactis subsp. lactis CV56; complete genome	100	1	Bacteria;Firmicutes;Bacilli;Lactobacillales;Streptococcaceae;Lactococcus;Lactococcus_lactis
k127_142100	677	nt	S	AE005176.1	100	1	677	0	1251	677	AE005176.1 Lactococcus lactis subsp. lactis Il1403; complete genome	100	1	Bacteria;Firmicutes;Bacilli;Lactobacillales;Streptococcaceae;Lactococcus;Lactococcus_lactis
k127_1434048	1454	nt	S	CP006766.1	99.931	1	1454	0	2680	1454	CP006766.1 Lactococcus lactis subsp. lactis KLDS 4.0325 chromosome; complete genome	100	1	Bacteria;Firmicutes;Bacilli;Lactobacillales;Streptococcaceae;Lactococcus;Lactococcus_lactis
k127_1434381	3011	nt	S	CP043523.1	99.796	75	3011	0	5391	3011	CP043523.1 Lactococcus lactis subsp. lactis bv. diacetylactis strain SD96 chromosome; complete genome	97.5423	1	Bacteria;Firmicutes;Bacilli;Lactobacillales;Streptococcaceae;Lactococcus;Lactococcus_lactis
k127_1437972	707	nt	S	AE005176.1	99.859	1	707	0	1301	707	AE005176.1 Lactococcus lactis subsp. lactis Il1403; complete genome	100	1	Bacteria;Firmicutes;Bacilli;Lactobacillales;Streptococcaceae;Lactococcus;Lactococcus_lactis
k127_1441447	1643	nt	S	CP015895.1	99.753	26	1643	0	2966	1643	CP015895.1 Lactococcus lactis subsp. lactis strain 184; complete genome	98.4784	1	Bacteria;Firmicutes;Bacilli;Lactobacillales;Streptococcaceae;Lactococcus;Lactococcus_lactis
k127_1442751	521	nt	S	AE005176.1	100	1	521	0	963	521	AE005176.1 Lactococcus lactis subsp. lactis Il1403; complete genome	100	1	Bacteria;Firmicutes;Bacilli;Lactobacillales;Streptococcaceae;Lactococcus;Lactococcus_lactis
k127_1468476	821	nt	S	CP001834.1	100	1	821	0	1517	821	CP001834.1 Lactococcus lactis subsp. lactis KF147; complete genome	100	1	Bacteria;Firmicutes;Bacilli;Lactobacillales;Streptococcaceae;Lactococcus;Lactococcus_lactis
k127_147330	796	nt	S	AE005176.1	99.568	334	796	0	845	796	AE005176.1 Lactococcus lactis subsp. lactis Il1403; complete genome	58.1658	1	Bacteria;Firmicutes;Bacilli;Lactobacillales;Streptococcaceae;Lactococcus;Lactococcus_lactis
k127_148888	1398	nt	S	AE005176.1	99.928	1	1398	0	2577	1398	AE005176.1 Lactococcus lactis subsp. lactis Il1403; complete genome	100	1	Bacteria;Firmicutes;Bacilli;Lactobacillales;Streptococcaceae;Lactococcus;Lactococcus_lactis
k127_1491884	813	nt	S	AE005176.1	99.877	1	813	0	1496	813	AE005176.1 Lactococcus lactis subsp. lactis Il1403; complete genome	100	1	Bacteria;Firmicutes;Bacilli;Lactobacillales;Streptococcaceae;Lactococcus;Lactococcus_lactis
k127_1498171	806	nt	S	CP016699.1	100	1	806	0	1489	806	CP016699.1 Lactococcus lactis subsp. lactis strain 275 plasmid p275A; complete sequence	100	1	Bacteria;Firmicutes;Bacilli;Lactobacillales;Streptococcaceae;Lactococcus;Lactococcus_lactis
k127_1519364	863	nt	S	CP015895.1	100	1	863	0	1594	863	CP015895.1 Lactococcus lactis subsp. lactis strain 184; complete genome	100	1	Bacteria;Firmicutes;Bacilli;Lactobacillales;Streptococcaceae;Lactococcus;Lactococcus_lactis
k127_1562540	1756	nt	S	CP015895.1	97.082	1	990	0	1666	1756	CP015895.1 Lactococcus lactis subsp. lactis strain 184; complete genome	56.6059	1	Bacteria;Firmicutes;Bacilli;Lactobacillales;Streptococcaceae;Lactococcus;Lactococcus_lactis
k127_1570240	917	nt	S	AE005176.1	100	1	917	0	1694	917	AE005176.1 Lactococcus lactis subsp. lactis Il1403; complete genome	100	1	Bacteria;Firmicutes;Bacilli;Lactobacillales;Streptococcaceae;Lactococcus;Lactococcus_lactis
k127_1572408	733	nt	S	AB016236.1	99.864	1	733	0	1349	733	AB016236.1 Lactococcus lactis bv. diacetylactis DNA; citrate permease gene	100	1	Bacteria;Firmicutes;Bacilli;Lactobacillales;Streptococcaceae;Lactococcus;Lactococcus_lactis
k127_1574570	825	nt	S	AE005176.1	99.636	1	825	0	1507	825	AE005176.1 Lactococcus lactis subsp. lactis Il1403; complete genome	100	1	Bacteria;Firmicutes;Bacilli;Lactobacillales;Streptococcaceae;Lactococcus;Lactococcus_lactis
k127_1608036	740	nt	S	AE005176.1	99.865	1	740	0	1362	740	AE005176.1 Lactococcus lactis subsp. lactis Il1403; complete genome	100	1	Bacteria;Firmicutes;Bacilli;Lactobacillales;Streptococcaceae;Lactococcus;Lactococcus_lactis
k127_1615475	828	nt	S	CP002365.1	100	1	828	0	1530	828	CP002365.1 Lactococcus lactis subsp. lactis CV56; complete genome	100	1	Bacteria;Firmicutes;Bacilli;Lactobacillales;Streptococcaceae;Lactococcus;Lactococcus_lactis
k127_1633735	586	nt	S	AE005176.1	99.659	1	586	0	1072	586	AE005176.1 Lactococcus lactis subsp. lactis Il1403; complete genome	100	1	Bacteria;Firmicutes;Bacilli;Lactobacillales;Streptococcaceae;Lactococcus;Lactococcus_lactis
k127_1668599	10585	nt	S	CP065733.1	99.915	1	10585	0	19498	10585	CP065733.1 Lactococcus lactis strain FDAARGOS_866 plasmid unnamed3; complete sequence	100	1	Bacteria;Firmicutes;Bacilli;Lactobacillales;Streptococcaceae;Lactococcus;Lactococcus_lactis
k127_1688643	821	nt	S	CP002365.1	98.551	1	821	0	1456	821	CP002365.1 Lactococcus lactis subsp. lactis CV56; complete genome	100	1	Bacteria;Firmicutes;Bacilli;Lactobacillales;Streptococcaceae;Lactococcus;Lactococcus_lactis
k127_1689226	1536	nt	S	KX138409.1	97.102	1	1536	0	2603	1536	KX138409.1 Lactococcus lactis strain NCDO712 plasmid pNZ712; complete sequence	100	1	Bacteria;Firmicutes;Bacilli;Lactobacillales;Streptococcaceae;Lactococcus;Lactococcus_lactis
k127_1692787	943	nt	S	AE005176.1	100	1	943	0	1742	943	AE005176.1 Lactococcus lactis subsp. lactis Il1403; complete genome	100	1	Bacteria;Firmicutes;Bacilli;Lactobacillales;Streptococcaceae;Lactococcus;Lactococcus_lactis
k127_1702940	778	nt	S	KX790947.1	99.871	1	778	0	1432	778	KX790947.1 Lactococcus lactis subsp. lactis strain DGCC 1760 glucose-6-phosphate isomerase gene; complete cds	100	1	Bacteria;Firmicutes;Bacilli;Lactobacillales;Streptococcaceae;Lactococcus;Lactococcus_lactis
k127_1708228	1004	nt	S	AE005176.1	99.801	1	1004	0	1844	1004	AE005176.1 Lactococcus lactis subsp. lactis Il1403; complete genome	100	1	Bacteria;Firmicutes;Bacilli;Lactobacillales;Streptococcaceae;Lactococcus;Lactococcus_lactis
k127_172572	589	nt	S	AE005176.1	99.66	1	589	0	1077	589	AE005176.1 Lactococcus lactis subsp. lactis Il1403; complete genome	100	1	Bacteria;Firmicutes;Bacilli;Lactobacillales;Streptococcaceae;Lactococcus;Lactococcus_lactis
k127_1731612	3331	nt	S	CP006766.1	99.597	1099	3331	0	4074	3331	CP006766.1 Lactococcus lactis subsp. lactis KLDS 4.0325 chromosome; complete genome	67.0369	1	Bacteria;Firmicutes;Bacilli;Lactobacillales;Streptococcaceae;Lactococcus;Lactococcus_lactis
k127_1761985	1010	db_customA	S	CP033607.1	99.801	1	1006	0	1847	1010	CP033607.1 Lactococcus lactis strain IL1403 chromosome	99.604	1	Bacteria;Firmicutes;Bacilli;Lactobacillales;Streptococcaceae;Lactococcus;Lactococcus_lactis
k127_179417	585	nt	S	LT599053.1	98.939	209	585	0	675	585	LT599053.1 Lactococcus lactis subsp. lactis strain A12 genome assembly; plasmid: pA12-4	64.4444	1	Bacteria;Firmicutes;Bacilli;Lactobacillales;Streptococcaceae;Lactococcus;Lactococcus_lactis
k127_1798373	688	nt	S	AE005176.1	99.273	1	688	0	1243	688	AE005176.1 Lactococcus lactis subsp. lactis Il1403; complete genome	100	1	Bacteria;Firmicutes;Bacilli;Lactobacillales;Streptococcaceae;Lactococcus;Lactococcus_lactis
k127_1798605	883	nt	S	AE005176.1	100	1	883	0	1631	883	AE005176.1 Lactococcus lactis subsp. lactis Il1403; complete genome	100	1	Bacteria;Firmicutes;Bacilli;Lactobacillales;Streptococcaceae;Lactococcus;Lactococcus_lactis
k127_1853261	1560	nt	S	CP015895.1	99.872	1	1560	0	2870	1560	CP015895.1 Lactococcus lactis subsp. lactis strain 184; complete genome	100	1	Bacteria;Firmicutes;Bacilli;Lactobacillales;Streptococcaceae;Lactococcus;Lactococcus_lactis
k127_1904764	4598	nt	S	AY542691.1	99.783	1	4598	0	8436	4598	AY542691.1 Lactococcus lactis clone S3 lactocepin (prtP) gene; complete cds	100	1	Bacteria;Firmicutes;Bacilli;Lactobacillales;Streptococcaceae;Lactococcus;Lactococcus_lactis
k127_1908441	1036	nt	S	CP002365.1	100	1	1036	0	1914	1036	CP002365.1 Lactococcus lactis subsp. lactis CV56; complete genome	100	1	Bacteria;Firmicutes;Bacilli;Lactobacillales;Streptococcaceae;Lactococcus;Lactococcus_lactis
k127_1911636	1526	nt	S	AE005176.1	99.934	1	1526	0	2813	1526	AE005176.1 Lactococcus lactis subsp. lactis Il1403; complete genome	100	1	Bacteria;Firmicutes;Bacilli;Lactobacillales;Streptococcaceae;Lactococcus;Lactococcus_lactis
k127_195033	589	nt	S	CP001834.1	99.83	1	589	0	1083	589	CP001834.1 Lactococcus lactis subsp. lactis KF147; complete genome	100	1	Bacteria;Firmicutes;Bacilli;Lactobacillales;Streptococcaceae;Lactococcus;Lactococcus_lactis
k127_1951269	1084	nt	S	AP012281.1	97.969	1	1081	0	1875	1084	AP012281.1 Lactococcus lactis subsp. lactis IO-1 DNA; complete genome	99.9077	1	Bacteria;Firmicutes;Bacilli;Lactobacillales;Streptococcaceae;Lactococcus;Lactococcus_lactis
k127_1969547	1110	nt	S	CP015895.1	99.64	1	1110	0	2028	1110	CP015895.1 Lactococcus lactis subsp. lactis strain 184; complete genome	100	1	Bacteria;Firmicutes;Bacilli;Lactobacillales;Streptococcaceae;Lactococcus;Lactococcus_lactis
k127_1977179	1229	db_customA	S	CP033607.1	99.912	94	1229	0	2093	1229	CP033607.1 Lactococcus lactis strain IL1403 chromosome	92.4329	1	Bacteria;Firmicutes;Bacilli;Lactobacillales;Streptococcaceae;Lactococcus;Lactococcus_lactis
k127_1977191	1897	nt	S	CP015896.1	99.947	1	1895	0	3494	1897	CP015896.1 Lactococcus lactis subsp. lactis strain 229; complete genome	99.8946	1	Bacteria;Firmicutes;Bacilli;Lactobacillales;Streptococcaceae;Lactococcus;Lactococcus_lactis
k127_2004701	423	nt	S	AE005176.1	100	1	423	0	782	423	AE005176.1 Lactococcus lactis subsp. lactis Il1403; complete genome	100	1	Bacteria;Firmicutes;Bacilli;Lactobacillales;Streptococcaceae;Lactococcus;Lactococcus_lactis
k127_2017146	2508	nt	S	CP003158.1	99.695	1	1639	0	3000	2508	CP003158.1 Lactococcus lactis subsp. cremoris UC509.9 plasmid pCIS8; complete sequence	65.3907	1	Bacteria;Firmicutes;Bacilli;Lactobacillales;Streptococcaceae;Lactococcus;Lactococcus_lactis
k127_2039786	678	nt	S	AE005176.1	99.853	1	678	0	1247	678	AE005176.1 Lactococcus lactis subsp. lactis Il1403; complete genome	100	1	Bacteria;Firmicutes;Bacilli;Lactobacillales;Streptococcaceae;Lactococcus;Lactococcus_lactis
k127_2042761	835	db_customA	S	CP033607.1	99.042	1	835	0	1498	835	CP033607.1 Lactococcus lactis strain IL1403 chromosome	100	1	Bacteria;Firmicutes;Bacilli;Lactobacillales;Streptococcaceae;Lactococcus;Lactococcus_lactis
k127_2053821	1140	nt	S	AE005176.1	100	1	1140	0	2106	1140	AE005176.1 Lactococcus lactis subsp. lactis Il1403; complete genome	100	1	Bacteria;Firmicutes;Bacilli;Lactobacillales;Streptococcaceae;Lactococcus;Lactococcus_lactis
k127_2068339	1304	nt	S	CP015895.1	99.609	1	1280	0	2337	1304	CP015895.1 Lactococcus lactis subsp. lactis strain 184; complete genome	98.1595	1	Bacteria;Firmicutes;Bacilli;Lactobacillales;Streptococcaceae;Lactococcus;Lactococcus_lactis
k127_2071117	912	nt	S	AE005176.1	100	1	912	0	1685	912	AE005176.1 Lactococcus lactis subsp. lactis Il1403; complete genome	100	1	Bacteria;Firmicutes;Bacilli;Lactobacillales;Streptococcaceae;Lactococcus;Lactococcus_lactis
k127_209057	765	nt	S	CP002365.1	100	1	765	0	1413	765	CP002365.1 Lactococcus lactis subsp. lactis CV56; complete genome	100	1	Bacteria;Firmicutes;Bacilli;Lactobacillales;Streptococcaceae;Lactococcus;Lactococcus_lactis
k127_2134012	1482	db_customA	S	CP033607.1	99.933	1	1482	0	2732	1482	CP033607.1 Lactococcus lactis strain IL1403 chromosome	100	1	Bacteria;Firmicutes;Bacilli;Lactobacillales;Streptococcaceae;Lactococcus;Lactococcus_lactis
k127_2159811	702	nt	S	CP002365.1	100	1	702	0	1297	702	CP002365.1 Lactococcus lactis subsp. lactis CV56; complete genome	100	1	Bacteria;Firmicutes;Bacilli;Lactobacillales;Streptococcaceae;Lactococcus;Lactococcus_lactis
k127_2164070	558	nt	S	AE005176.1	99.642	1	558	0	1020	558	AE005176.1 Lactococcus lactis subsp. lactis Il1403; complete genome	100	1	Bacteria;Firmicutes;Bacilli;Lactobacillales;Streptococcaceae;Lactococcus;Lactococcus_lactis
k127_2165383	625	nt	S	CP001834.1	100	1	625	0	1155	625	CP001834.1 Lactococcus lactis subsp. lactis KF147; complete genome	100	1	Bacteria;Firmicutes;Bacilli;Lactobacillales;Streptococcaceae;Lactococcus;Lactococcus_lactis
k127_2169538	1857	nt	S	CP016700.1	98.851	1	1740	0	3103	1857	CP016700.1 Lactococcus lactis subsp. lactis strain 275 plasmid p275B; complete sequence	93.6995	1	Bacteria;Firmicutes;Bacilli;Lactobacillales;Streptococcaceae;Lactococcus;Lactococcus_lactis
k127_2170867	1154	nt	S	CP006766.1	100	1	1154	0	2132	1154	CP006766.1 Lactococcus lactis subsp. lactis KLDS 4.0325 chromosome; complete genome	100	1	Bacteria;Firmicutes;Bacilli;Lactobacillales;Streptococcaceae;Lactococcus;Lactococcus_lactis
k127_2184474	2528	nt	S	CP006766.1	97.024	443	2524	0	3500	2528	CP006766.1 Lactococcus lactis subsp. lactis KLDS 4.0325 chromosome; complete genome	82.3972	1	Bacteria;Firmicutes;Bacilli;Lactobacillales;Streptococcaceae;Lactococcus;Lactococcus_lactis
k127_2187382	1060	nt	S	AE005176.1	100	1	1060	0	1958	1060	AE005176.1 Lactococcus lactis subsp. lactis Il1403; complete genome	100	1	Bacteria;Firmicutes;Bacilli;Lactobacillales;Streptococcaceae;Lactococcus;Lactococcus_lactis
k127_2195304	1047	nt	S	AE005176.1	99.904	1	1047	0	1929	1047	AE005176.1 Lactococcus lactis subsp. lactis Il1403; complete genome	100	1	Bacteria;Firmicutes;Bacilli;Lactobacillales;Streptococcaceae;Lactococcus;Lactococcus_lactis
k127_220852	1731	nt	S	CP015895.1	100	10	1731	0	3181	1731	CP015895.1 Lactococcus lactis subsp. lactis strain 184; complete genome	99.4801	1	Bacteria;Firmicutes;Bacilli;Lactobacillales;Streptococcaceae;Lactococcus;Lactococcus_lactis
k127_22529	1386	nt	S	CP006766.1	100	1	1386	0	2560	1386	CP006766.1 Lactococcus lactis subsp. lactis KLDS 4.0325 chromosome; complete genome	100	1	Bacteria;Firmicutes;Bacilli;Lactobacillales;Streptococcaceae;Lactococcus;Lactococcus_lactis
k127_2268974	579	db_customA	S	CP033607.1	99.827	1	579	0	1064	579	CP033607.1 Lactococcus lactis strain IL1403 chromosome	100	1	Bacteria;Firmicutes;Bacilli;Lactobacillales;Streptococcaceae;Lactococcus;Lactococcus_lactis
k127_2317588	499	nt	S	AE005176.1	100	1	499	0	922	499	AE005176.1 Lactococcus lactis subsp. lactis Il1403; complete genome	100	1	Bacteria;Firmicutes;Bacilli;Lactobacillales;Streptococcaceae;Lactococcus;Lactococcus_lactis
k127_2319223	6517	nt	S	CP016700.1	99.111	4270	6517	0	4041	6517	CP016700.1 Lactococcus lactis subsp. lactis strain 275 plasmid p275B; complete sequence	34.5097	4	Bacteria;Firmicutes;Bacilli;Lactobacillales;Streptococcaceae;Lactococcus;Lactococcus_lactis
k127_2322237	1127	nt	S	CP002365.1	99.734	1	1127	0	2065	1127	CP002365.1 Lactococcus lactis subsp. lactis CV56; complete genome	100	1	Bacteria;Firmicutes;Bacilli;Lactobacillales;Streptococcaceae;Lactococcus;Lactococcus_lactis
k127_2324627	1326	nt	S	AE005176.1	99.849	1	1326	0	2438	1326	AE005176.1 Lactococcus lactis subsp. lactis Il1403; complete genome	100	1	Bacteria;Firmicutes;Bacilli;Lactobacillales;Streptococcaceae;Lactococcus;Lactococcus_lactis
k127_2339937	747	nt	S	AE005176.1	99.598	1	747	0	1363	747	AE005176.1 Lactococcus lactis subsp. lactis Il1403; complete genome	100	1	Bacteria;Firmicutes;Bacilli;Lactobacillales;Streptococcaceae;Lactococcus;Lactococcus_lactis
k127_2405243	3038	nt	S	CP015895.1	99.868	1	3038	0	5589	3038	CP015895.1 Lactococcus lactis subsp. lactis strain 184; complete genome	100	1	Bacteria;Firmicutes;Bacilli;Lactobacillales;Streptococcaceae;Lactococcus;Lactococcus_lactis
k127_2438705	594	nt	S	AE005176.1	100	1	594	0	1098	594	AE005176.1 Lactococcus lactis subsp. lactis Il1403; complete genome	100	1	Bacteria;Firmicutes;Bacilli;Lactobacillales;Streptococcaceae;Lactococcus;Lactococcus_lactis
k127_2446033	3343	nt	S	CP043526.1	99.821	1	3343	0	6141	3343	CP043526.1 Lactococcus lactis subsp. lactis bv. diacetylactis strain SD96 plasmid pSD96_02; complete sequence	100	1	Bacteria;Firmicutes;Bacilli;Lactobacillales;Streptococcaceae;Lactococcus;Lactococcus_lactis
k127_2454188	511	nt	S	AE005176.1	99.804	1	511	0	939	511	AE005176.1 Lactococcus lactis subsp. lactis Il1403; complete genome	100	1	Bacteria;Firmicutes;Bacilli;Lactobacillales;Streptococcaceae;Lactococcus;Lactococcus_lactis
k127_2469407	934	nt	S	AE005176.1	100	1	934	0	1725	934	AE005176.1 Lactococcus lactis subsp. lactis Il1403; complete genome	100	1	Bacteria;Firmicutes;Bacilli;Lactobacillales;Streptococcaceae;Lactococcus;Lactococcus_lactis
k127_2477385	1302	db_customA	S	CP033607.1	99.707	620	1302	0	1251	1302	CP033607.1 Lactococcus lactis strain IL1403 chromosome	52.4578	2	Bacteria;Firmicutes;Bacilli;Lactobacillales;Streptococcaceae;Lactococcus;Lactococcus_lactis
k127_2483775	700	db_customA	S	CP033607.1	99.427	1	698	0	1267	700	CP033607.1 Lactococcus lactis strain IL1403 chromosome	99.7143	1	Bacteria;Firmicutes;Bacilli;Lactobacillales;Streptococcaceae;Lactococcus;Lactococcus_lactis
k127_2485205	746	nt	S	AE005176.1	100	1	746	0	1378	746	AE005176.1 Lactococcus lactis subsp. lactis Il1403; complete genome	100	1	Bacteria;Firmicutes;Bacilli;Lactobacillales;Streptococcaceae;Lactococcus;Lactococcus_lactis
k127_2493208	668	nt	S	AE005176.1	100	1	668	0	1234	668	AE005176.1 Lactococcus lactis subsp. lactis Il1403; complete genome	100	1	Bacteria;Firmicutes;Bacilli;Lactobacillales;Streptococcaceae;Lactococcus;Lactococcus_lactis
k127_249648	1001	nt	S	CP006766.1	100	1	1001	0	1849	1001	CP006766.1 Lactococcus lactis subsp. lactis KLDS 4.0325 chromosome; complete genome	100	1	Bacteria;Firmicutes;Bacilli;Lactobacillales;Streptococcaceae;Lactococcus;Lactococcus_lactis
k127_2496705	1627	nt	S	CP002365.1	99.939	1	1627	0	3000	1627	CP002365.1 Lactococcus lactis subsp. lactis CV56; complete genome	100	1	Bacteria;Firmicutes;Bacilli;Lactobacillales;Streptococcaceae;Lactococcus;Lactococcus_lactis
k127_2503755	2700	nt	S	CP016699.1	98.582	1	1904	0	3367	2700	CP016699.1 Lactococcus lactis subsp. lactis strain 275 plasmid p275A; complete sequence	70.5185	1	Bacteria;Firmicutes;Bacilli;Lactobacillales;Streptococcaceae;Lactococcus;Lactococcus_lactis
k127_2507554	2201	nt	S	CP053671.2	99.045	1	2199	0	3943	2201	CP053671.2 Lactococcus lactis subsp. lactis strain G121 chromosome; complete genome	99.9091	1	Bacteria;Firmicutes;Bacilli;Lactobacillales;Streptococcaceae;Lactococcus;Lactococcus_lactis
k127_2511371	488	nt	S	CP015895.1	100	1	488	0	902	488	CP015895.1 Lactococcus lactis subsp. lactis strain 184; complete genome	100	1	Bacteria;Firmicutes;Bacilli;Lactobacillales;Streptococcaceae;Lactococcus;Lactococcus_lactis
k127_2523991	1217	nt	S	CP002365.1	99.044	67	1217	0	2063	1217	CP002365.1 Lactococcus lactis subsp. lactis CV56; complete genome	94.5768	1	Bacteria;Firmicutes;Bacilli;Lactobacillales;Streptococcaceae;Lactococcus;Lactococcus_lactis
k127_2557683	864	db_customA	S	CP033607.1	99.884	1	864	0	1591	864	CP033607.1 Lactococcus lactis strain IL1403 chromosome	100	1	Bacteria;Firmicutes;Bacilli;Lactobacillales;Streptococcaceae;Lactococcus;Lactococcus_lactis
k127_2561716	485	nt	S	CP001834.1	99.175	1	485	0	874	485	CP001834.1 Lactococcus lactis subsp. lactis KF147; complete genome	100	1	Bacteria;Firmicutes;Bacilli;Lactobacillales;Streptococcaceae;Lactococcus;Lactococcus_lactis
k127_2577084	1132	nt	S	AE005176.1	99.912	1	1132	0	2085	1132	AE005176.1 Lactococcus lactis subsp. lactis Il1403; complete genome	100	1	Bacteria;Firmicutes;Bacilli;Lactobacillales;Streptococcaceae;Lactococcus;Lactococcus_lactis
k127_2587617	1291	nt	S	CP000428.1	97.168	57	1291	0	2087	1291	CP000428.1 Lactococcus lactis subsp. cremoris SK11 plasmid 3; complete sequence	95.7397	1	Bacteria;Firmicutes;Bacilli;Lactobacillales;Streptococcaceae;Lactococcus;Lactococcus_lactis
k127_2592811	505	nt	S	AE005176.1	99.778	56	505	0	826	505	AE005176.1 Lactococcus lactis subsp. lactis Il1403; complete genome	89.1089	1	Bacteria;Firmicutes;Bacilli;Lactobacillales;Streptococcaceae;Lactococcus;Lactococcus_lactis
k127_2597517	665	nt	S	AE005176.1	100	1	665	0	1229	665	AE005176.1 Lactococcus lactis subsp. lactis Il1403; complete genome	100	1	Bacteria;Firmicutes;Bacilli;Lactobacillales;Streptococcaceae;Lactococcus;Lactococcus_lactis
k127_2602108	981	nt	S	CP015897.1	99.898	1	981	0	1807	981	CP015897.1 Lactococcus lactis subsp. lactis strain 275; complete genome	100	1	Bacteria;Firmicutes;Bacilli;Lactobacillales;Streptococcaceae;Lactococcus;Lactococcus_lactis
k127_2614764	1027	nt	S	AE005176.1	100	1	1027	0	1897	1027	AE005176.1 Lactococcus lactis subsp. lactis Il1403; complete genome	100	1	Bacteria;Firmicutes;Bacilli;Lactobacillales;Streptococcaceae;Lactococcus;Lactococcus_lactis
k127_2615696	711	nt	S	AE005176.1	100	1	711	0	1314	711	AE005176.1 Lactococcus lactis subsp. lactis Il1403; complete genome	100	1	Bacteria;Firmicutes;Bacilli;Lactobacillales;Streptococcaceae;Lactococcus;Lactococcus_lactis
k127_2615922	1412	nt	S	CP015895.1	99.717	1	1412	0	2586	1412	CP015895.1 Lactococcus lactis subsp. lactis strain 184; complete genome	100	1	Bacteria;Firmicutes;Bacilli;Lactobacillales;Streptococcaceae;Lactococcus;Lactococcus_lactis
k127_2645440	1975	db_customA	S	CP033607.1	99.899	1	1974	0	3635	1975	CP033607.1 Lactococcus lactis strain IL1403 chromosome	99.9494	1	Bacteria;Firmicutes;Bacilli;Lactobacillales;Streptococcaceae;Lactococcus;Lactococcus_lactis
k127_2676916	1503	nt	S	AE005176.1	99.927	1	1376	0	2536	1503	AE005176.1 Lactococcus lactis subsp. lactis Il1403; complete genome	91.5502	1	Bacteria;Firmicutes;Bacilli;Lactobacillales;Streptococcaceae;Lactococcus;Lactococcus_lactis
k127_2678258	1518	nt	S	CP006766.1	100	1	1518	0	2804	1518	CP006766.1 Lactococcus lactis subsp. lactis KLDS 4.0325 chromosome; complete genome	100	1	Bacteria;Firmicutes;Bacilli;Lactobacillales;Streptococcaceae;Lactococcus;Lactococcus_lactis
k127_2682022	1179	nt	S	AE005176.1	99.915	1	1179	0	2172	1179	AE005176.1 Lactococcus lactis subsp. lactis Il1403; complete genome	100	1	Bacteria;Firmicutes;Bacilli;Lactobacillales;Streptococcaceae;Lactococcus;Lactococcus_lactis
k127_2683144	1300	nt	S	CP002365.1	99.764	1	1271	0	2331	1300	CP002365.1 Lactococcus lactis subsp. lactis CV56; complete genome	97.7692	1	Bacteria;Firmicutes;Bacilli;Lactobacillales;Streptococcaceae;Lactococcus;Lactococcus_lactis
k127_2686018	785	nt	S	AE005176.1	100	1	785	0	1450	785	AE005176.1 Lactococcus lactis subsp. lactis Il1403; complete genome	100	1	Bacteria;Firmicutes;Bacilli;Lactobacillales;Streptococcaceae;Lactococcus;Lactococcus_lactis
k127_2702848	1046	nt	S	AE005176.1	99.522	1	1046	0	1905	1046	AE005176.1 Lactococcus lactis subsp. lactis Il1403; complete genome	100	1	Bacteria;Firmicutes;Bacilli;Lactobacillales;Streptococcaceae;Lactococcus;Lactococcus_lactis
k127_2710075	955	nt	S	AE005176.1	99.895	1	955	0	1759	955	AE005176.1 Lactococcus lactis subsp. lactis Il1403; complete genome	100	1	Bacteria;Firmicutes;Bacilli;Lactobacillales;Streptococcaceae;Lactococcus;Lactococcus_lactis
k127_2711309	471	nt	S	AE005176.1	100	1	471	0	870	471	AE005176.1 Lactococcus lactis subsp. lactis Il1403; complete genome	100	1	Bacteria;Firmicutes;Bacilli;Lactobacillales;Streptococcaceae;Lactococcus;Lactococcus_lactis
k127_2713186	608	nt	S	AE005176.1	99.836	1	608	0	1118	608	AE005176.1 Lactococcus lactis subsp. lactis Il1403; complete genome	100	1	Bacteria;Firmicutes;Bacilli;Lactobacillales;Streptococcaceae;Lactococcus;Lactococcus_lactis
k127_2715127	780	nt	S	AE005176.1	99.744	1	780	0	1430	780	AE005176.1 Lactococcus lactis subsp. lactis Il1403; complete genome	100	1	Bacteria;Firmicutes;Bacilli;Lactobacillales;Streptococcaceae;Lactococcus;Lactococcus_lactis
k127_2717067	699	nt	S	CP001834.1	99.571	1	699	0	1275	699	CP001834.1 Lactococcus lactis subsp. lactis KF147; complete genome	100	1	Bacteria;Firmicutes;Bacilli;Lactobacillales;Streptococcaceae;Lactococcus;Lactococcus_lactis
k127_2721051	518	nt	S	AE005176.1	99.807	1	518	0	952	518	AE005176.1 Lactococcus lactis subsp. lactis Il1403; complete genome	100	1	Bacteria;Firmicutes;Bacilli;Lactobacillales;Streptococcaceae;Lactococcus;Lactococcus_lactis
k127_2737923	654	db_customA	S	CP033607.1	100	1	654	0	1208	654	CP033607.1 Lactococcus lactis strain IL1403 chromosome	100	1	Bacteria;Firmicutes;Bacilli;Lactobacillales;Streptococcaceae;Lactococcus;Lactococcus_lactis
k127_2739858	524	nt	S	AE005176.1	100	1	524	0	968	524	AE005176.1 Lactococcus lactis subsp. lactis Il1403; complete genome	100	1	Bacteria;Firmicutes;Bacilli;Lactobacillales;Streptococcaceae;Lactococcus;Lactococcus_lactis
k127_2741159	631	nt	S	AE005176.1	99.833	1	599	0	1101	631	AE005176.1 Lactococcus lactis subsp. lactis Il1403; complete genome	94.9287	1	Bacteria;Firmicutes;Bacilli;Lactobacillales;Streptococcaceae;Lactococcus;Lactococcus_lactis
k127_2771938	682	db_customA	S	CP033607.1	100	1	682	0	1260	682	CP033607.1 Lactococcus lactis strain IL1403 chromosome	100	1	Bacteria;Firmicutes;Bacilli;Lactobacillales;Streptococcaceae;Lactococcus;Lactococcus_lactis
k127_2787029	1128	db_customA	S	CP033607.1	99.911	1	1128	0	2078	1128	CP033607.1 Lactococcus lactis strain IL1403 chromosome	100	1	Bacteria;Firmicutes;Bacilli;Lactobacillales;Streptococcaceae;Lactococcus;Lactococcus_lactis
k127_2789700	1604	db_customA	S	CP033607.1	99.501	1	1604	0	2918	1604	CP033607.1 Lactococcus lactis strain IL1403 chromosome	100	1	Bacteria;Firmicutes;Bacilli;Lactobacillales;Streptococcaceae;Lactococcus;Lactococcus_lactis
k127_280702	1097	nt	S	CP006766.1	99.727	1	1097	0	2010	1097	CP006766.1 Lactococcus lactis subsp. lactis KLDS 4.0325 chromosome; complete genome	100	1	Bacteria;Firmicutes;Bacilli;Lactobacillales;Streptococcaceae;Lactococcus;Lactococcus_lactis
k127_2808033	828	nt	S	AE005176.1	99.758	1	828	0	1519	828	AE005176.1 Lactococcus lactis subsp. lactis Il1403; complete genome	100	1	Bacteria;Firmicutes;Bacilli;Lactobacillales;Streptococcaceae;Lactococcus;Lactococcus_lactis
k127_2812445	1062	nt	S	AE005176.1	99.906	1	1061	0	1954	1062	AE005176.1 Lactococcus lactis subsp. lactis Il1403; complete genome	99.9058	1	Bacteria;Firmicutes;Bacilli;Lactobacillales;Streptococcaceae;Lactococcus;Lactococcus_lactis
k127_2840134	3463	nt	S	CP010050.1	99.785	1	3254	0	5971	3463	CP010050.1 Lactococcus lactis subsp. lactis strain S0; complete genome	93.9648	1	Bacteria;Firmicutes;Bacilli;Lactobacillales;Streptococcaceae;Lactococcus;Lactococcus_lactis
k127_2851851	975	nt	S	CP016699.1	99.692	1	975	0	1784	975	CP016699.1 Lactococcus lactis subsp. lactis strain 275 plasmid p275A; complete sequence	100	1	Bacteria;Firmicutes;Bacilli;Lactobacillales;Streptococcaceae;Lactococcus;Lactococcus_lactis
k127_2855631	834	nt	S	CP002365.1	99.859	1	711	0	1308	834	CP002365.1 Lactococcus lactis subsp. lactis CV56; complete genome	85.2518	1	Bacteria;Firmicutes;Bacilli;Lactobacillales;Streptococcaceae;Lactococcus;Lactococcus_lactis
k127_2884785	810	nt	S	AE005176.1	100	1	810	0	1496	810	AE005176.1 Lactococcus lactis subsp. lactis Il1403; complete genome	100	1	Bacteria;Firmicutes;Bacilli;Lactobacillales;Streptococcaceae;Lactococcus;Lactococcus_lactis
k127_2897852	506	nt	S	CP002365.1	99.802	1	506	0	929	506	CP002365.1 Lactococcus lactis subsp. lactis CV56; complete genome	100	1	Bacteria;Firmicutes;Bacilli;Lactobacillales;Streptococcaceae;Lactococcus;Lactococcus_lactis
k127_290119	389	nt	S	CP002365.1	100	1	389	0	719	389	CP002365.1 Lactococcus lactis subsp. lactis CV56; complete genome	100	1	Bacteria;Firmicutes;Bacilli;Lactobacillales;Streptococcaceae;Lactococcus;Lactococcus_lactis
k127_2957938	2022	db_customA	S	CP033607.1	99.753	1	2022	0	3707	2022	CP033607.1 Lactococcus lactis strain IL1403 chromosome	100	1	Bacteria;Firmicutes;Bacilli;Lactobacillales;Streptococcaceae;Lactococcus;Lactococcus_lactis
k127_2994026	1184	nt	S	AE005176.1	99.831	1	1184	0	2176	1184	AE005176.1 Lactococcus lactis subsp. lactis Il1403; complete genome	100	1	Bacteria;Firmicutes;Bacilli;Lactobacillales;Streptococcaceae;Lactococcus;Lactococcus_lactis
k127_3002737	4454	nt	S	CP043523.1	100	1	4454	0	8226	4454	CP043523.1 Lactococcus lactis subsp. lactis bv. diacetylactis strain SD96 chromosome; complete genome	100	1	Bacteria;Firmicutes;Bacilli;Lactobacillales;Streptococcaceae;Lactococcus;Lactococcus_lactis
k127_3008590	1380	nt	S	CP002365.1	99.835	1	1215	0	2233	1380	CP002365.1 Lactococcus lactis subsp. lactis CV56; complete genome	88.0435	1	Bacteria;Firmicutes;Bacilli;Lactobacillales;Streptococcaceae;Lactococcus;Lactococcus_lactis
k127_300867	1209	db_customA	S	CP033607.1	100	1	1209	0	2233	1209	CP033607.1 Lactococcus lactis strain IL1403 chromosome	100	1	Bacteria;Firmicutes;Bacilli;Lactobacillales;Streptococcaceae;Lactococcus;Lactococcus_lactis
k127_3026404	1044	nt	S	CP015895.1	99.904	1	1044	0	1923	1044	CP015895.1 Lactococcus lactis subsp. lactis strain 184; complete genome	100	1	Bacteria;Firmicutes;Bacilli;Lactobacillales;Streptococcaceae;Lactococcus;Lactococcus_lactis
k127_3026564	407	nt	S	AE005176.1	100	1	407	0	752	407	AE005176.1 Lactococcus lactis subsp. lactis Il1403; complete genome	100	1	Bacteria;Firmicutes;Bacilli;Lactobacillales;Streptococcaceae;Lactococcus;Lactococcus_lactis
k127_3030777	450	nt	S	AE005176.1	99.556	1	450	0	821	450	AE005176.1 Lactococcus lactis subsp. lactis Il1403; complete genome	100	1	Bacteria;Firmicutes;Bacilli;Lactobacillales;Streptococcaceae;Lactococcus;Lactococcus_lactis
k127_3034903	890	nt	S	CP002365.1	99.888	1	890	0	1639	890	CP002365.1 Lactococcus lactis subsp. lactis CV56; complete genome	100	1	Bacteria;Firmicutes;Bacilli;Lactobacillales;Streptococcaceae;Lactococcus;Lactococcus_lactis
k127_3059008	814	nt	S	CP002365.1	99.877	1	814	0	1498	814	CP002365.1 Lactococcus lactis subsp. lactis CV56; complete genome	100	1	Bacteria;Firmicutes;Bacilli;Lactobacillales;Streptococcaceae;Lactococcus;Lactococcus_lactis
k127_3075406	742	nt	S	AE005176.1	99.596	1	742	0	1354	742	AE005176.1 Lactococcus lactis subsp. lactis Il1403; complete genome	100	1	Bacteria;Firmicutes;Bacilli;Lactobacillales;Streptococcaceae;Lactococcus;Lactococcus_lactis
k127_307681	893	nt	S	CP002365.1	99.888	1	893	0	1644	893	CP002365.1 Lactococcus lactis subsp. lactis CV56; complete genome	100	1	Bacteria;Firmicutes;Bacilli;Lactobacillales;Streptococcaceae;Lactococcus;Lactococcus_lactis
k127_309083	838	nt	S	CP029292.1	99.523	1	838	0	1526	838	CP029292.1 Lactococcus lactis subsp. lactis KLDS 4.0325 plasmid unnamed5	100	1	Bacteria;Firmicutes;Bacilli;Lactobacillales;Streptococcaceae;Lactococcus;Lactococcus_lactis
k127_310058	754	nt	S	CP002365.1	99.867	1	754	0	1387	754	CP002365.1 Lactococcus lactis subsp. lactis CV56; complete genome	100	1	Bacteria;Firmicutes;Bacilli;Lactobacillales;Streptococcaceae;Lactococcus;Lactococcus_lactis
k127_3138054	3018	nt	S	CP016694.1	99.934	1	3018	0	5563	3018	CP016694.1 Lactococcus lactis subsp. lactis strain 229 plasmid p229A; complete sequence	100	1	Bacteria;Firmicutes;Bacilli;Lactobacillales;Streptococcaceae;Lactococcus;Lactococcus_lactis
k127_3167599	719	nt	S	AE005176.1	100	1	719	0	1328	719	AE005176.1 Lactococcus lactis subsp. lactis Il1403; complete genome	100	1	Bacteria;Firmicutes;Bacilli;Lactobacillales;Streptococcaceae;Lactococcus;Lactococcus_lactis
k127_3168798	669	nt	S	AE005176.1	99.851	1	669	0	1230	669	AE005176.1 Lactococcus lactis subsp. lactis Il1403; complete genome	100	1	Bacteria;Firmicutes;Bacilli;Lactobacillales;Streptococcaceae;Lactococcus;Lactococcus_lactis
k127_3195874	1241	nt	S	CP006766.1	99.839	1	1241	0	2281	1241	CP006766.1 Lactococcus lactis subsp. lactis KLDS 4.0325 chromosome; complete genome	100	1	Bacteria;Firmicutes;Bacilli;Lactobacillales;Streptococcaceae;Lactococcus;Lactococcus_lactis
k127_3205292	716	nt	S	AE005176.1	100	1	716	0	1323	716	AE005176.1 Lactococcus lactis subsp. lactis Il1403; complete genome	100	1	Bacteria;Firmicutes;Bacilli;Lactobacillales;Streptococcaceae;Lactococcus;Lactococcus_lactis
k127_3208355	961	nt	S	AE005176.1	99.792	1	961	0	1764	961	AE005176.1 Lactococcus lactis subsp. lactis Il1403; complete genome	100	1	Bacteria;Firmicutes;Bacilli;Lactobacillales;Streptococcaceae;Lactococcus;Lactococcus_lactis
k127_3220182	2415	nt	S	CP016699.1	99.626	1	2409	0	4399	2415	CP016699.1 Lactococcus lactis subsp. lactis strain 275 plasmid p275A; complete sequence	99.7516	1	Bacteria;Firmicutes;Bacilli;Lactobacillales;Streptococcaceae;Lactococcus;Lactococcus_lactis
k127_3225382	1144	nt	S	AE005176.1	98.776	1	1144	0	2036	1144	AE005176.1 Lactococcus lactis subsp. lactis Il1403; complete genome	100	1	Bacteria;Firmicutes;Bacilli;Lactobacillales;Streptococcaceae;Lactococcus;Lactococcus_lactis
k127_3228979	818	nt	S	AE005176.1	97.311	1	818	0	1389	818	AE005176.1 Lactococcus lactis subsp. lactis Il1403; complete genome	100	1	Bacteria;Firmicutes;Bacilli;Lactobacillales;Streptococcaceae;Lactococcus;Lactococcus_lactis
k127_3235099	807	nt	S	AJ000326.1	100	1	807	0	1491	807	AJ000326.1 Lactococcus lactis pfl gene (strain DB1341)	100	1	Bacteria;Firmicutes;Bacilli;Lactobacillales;Streptococcaceae;Lactococcus;Lactococcus_lactis
k127_3248368	830	nt	S	AE005176.1	100	1	830	0	1533	830	AE005176.1 Lactococcus lactis subsp. lactis Il1403; complete genome	100	1	Bacteria;Firmicutes;Bacilli;Lactobacillales;Streptococcaceae;Lactococcus;Lactococcus_lactis
k127_3302156	1459	nt	S	CP006766.1	100	1	1459	0	2695	1459	CP006766.1 Lactococcus lactis subsp. lactis KLDS 4.0325 chromosome; complete genome	100	1	Bacteria;Firmicutes;Bacilli;Lactobacillales;Streptococcaceae;Lactococcus;Lactococcus_lactis
k127_330934	1193	nt	S	CP015896.1	99.749	1	1193	0	2187	1193	CP015896.1 Lactococcus lactis subsp. lactis strain 229; complete genome	100	1	Bacteria;Firmicutes;Bacilli;Lactobacillales;Streptococcaceae;Lactococcus;Lactococcus_lactis
k127_3309698	927	nt	S	AE005176.1	99.865	186	927	0	1365	927	AE005176.1 Lactococcus lactis subsp. lactis Il1403; complete genome	80.0431	1	Bacteria;Firmicutes;Bacilli;Lactobacillales;Streptococcaceae;Lactococcus;Lactococcus_lactis
k127_331933	585	nt	S	AE005176.1	100	1	585	0	1081	585	AE005176.1 Lactococcus lactis subsp. lactis Il1403; complete genome	100	1	Bacteria;Firmicutes;Bacilli;Lactobacillales;Streptococcaceae;Lactococcus;Lactococcus_lactis
k127_3322784	719	nt	S	CP015895.1	98.609	1	719	0	1273	719	CP015895.1 Lactococcus lactis subsp. lactis strain 184; complete genome	100	1	Bacteria;Firmicutes;Bacilli;Lactobacillales;Streptococcaceae;Lactococcus;Lactococcus_lactis
k127_3324507	581	nt	S	AE005176.1	100	1	581	0	1074	581	AE005176.1 Lactococcus lactis subsp. lactis Il1403; complete genome	100	1	Bacteria;Firmicutes;Bacilli;Lactobacillales;Streptococcaceae;Lactococcus;Lactococcus_lactis
k127_3348599	1514	nt	S	CP001834.1	99.934	1	1514	0	2791	1514	CP001834.1 Lactococcus lactis subsp. lactis KF147; complete genome	100	1	Bacteria;Firmicutes;Bacilli;Lactobacillales;Streptococcaceae;Lactococcus;Lactococcus_lactis
k127_3351546	1367	nt	S	CP002365.1	99.85	1	1331	0	2447	1367	CP002365.1 Lactococcus lactis subsp. lactis CV56; complete genome	97.3665	1	Bacteria;Firmicutes;Bacilli;Lactobacillales;Streptococcaceae;Lactococcus;Lactococcus_lactis
k127_338035	773	nt	S	AE005176.1	99.741	1	773	0	1417	773	AE005176.1 Lactococcus lactis subsp. lactis Il1403; complete genome	100	1	Bacteria;Firmicutes;Bacilli;Lactobacillales;Streptococcaceae;Lactococcus;Lactococcus_lactis
k127_3386280	1561	nt	S	AE005176.1	99.808	1	1561	0	2867	1561	AE005176.1 Lactococcus lactis subsp. lactis Il1403; complete genome	100	1	Bacteria;Firmicutes;Bacilli;Lactobacillales;Streptococcaceae;Lactococcus;Lactococcus_lactis
k127_3416274	819	nt	S	AY542691.1	100	1	819	0	1513	819	AY542691.1 Lactococcus lactis clone S3 lactocepin (prtP) gene; complete cds	100	1	Bacteria;Firmicutes;Bacilli;Lactobacillales;Streptococcaceae;Lactococcus;Lactococcus_lactis
k127_3417364	770	nt	S	AE005176.1	100	1	770	0	1423	770	AE005176.1 Lactococcus lactis subsp. lactis Il1403; complete genome	100	1	Bacteria;Firmicutes;Bacilli;Lactobacillales;Streptococcaceae;Lactococcus;Lactococcus_lactis
k127_3427791	1052	nt	S	CP016734.1	99.905	1	1052	0	1938	1052	CP016734.1 Lactococcus lactis subsp. lactis strain UC06 plasmid pUC06A; complete sequence	100	1	Bacteria;Firmicutes;Bacilli;Lactobacillales;Streptococcaceae;Lactococcus;Lactococcus_lactis
k127_343773	352	nt	S	AE005176.1	100	1	352	0	651	352	AE005176.1 Lactococcus lactis subsp. lactis Il1403; complete genome	100	1	Bacteria;Firmicutes;Bacilli;Lactobacillales;Streptococcaceae;Lactococcus;Lactococcus_lactis
k127_3441694	589	nt	S	CP015902.1	99.321	1	589	0	1066	589	CP015902.1 Lactococcus lactis subsp. lactis strain UC06; complete genome	100	1	Bacteria;Firmicutes;Bacilli;Lactobacillales;Streptococcaceae;Lactococcus;Lactococcus_lactis
k127_3443600	2354	nt	S	AE005176.1	100	1	2354	0	4348	2354	AE005176.1 Lactococcus lactis subsp. lactis Il1403; complete genome	100	1	Bacteria;Firmicutes;Bacilli;Lactobacillales;Streptococcaceae;Lactococcus;Lactococcus_lactis
k127_3444584	1498	nt	S	AE005176.1	98.865	1	1498	0	2673	1498	AE005176.1 Lactococcus lactis subsp. lactis Il1403; complete genome	100	1	Bacteria;Firmicutes;Bacilli;Lactobacillales;Streptococcaceae;Lactococcus;Lactococcus_lactis
k127_3458225	835	nt	S	CP002365.1	99.13	1	805	0	1448	835	CP002365.1 Lactococcus lactis subsp. lactis CV56; complete genome	96.4072	1	Bacteria;Firmicutes;Bacilli;Lactobacillales;Streptococcaceae;Lactococcus;Lactococcus_lactis
k127_347605	1211	db_customA	S	CP033607.1	99.917	1	1211	0	2231	1211	CP033607.1 Lactococcus lactis strain IL1403 chromosome	100	1	Bacteria;Firmicutes;Bacilli;Lactobacillales;Streptococcaceae;Lactococcus;Lactococcus_lactis
k127_3477608	420	nt	S	AE005176.1	99.762	1	420	0	771	420	AE005176.1 Lactococcus lactis subsp. lactis Il1403; complete genome	100	1	Bacteria;Firmicutes;Bacilli;Lactobacillales;Streptococcaceae;Lactococcus;Lactococcus_lactis
k127_3502839	454	nt	S	CP002365.1	100	1	454	0	839	454	CP002365.1 Lactococcus lactis subsp. lactis CV56; complete genome	100	1	Bacteria;Firmicutes;Bacilli;Lactobacillales;Streptococcaceae;Lactococcus;Lactococcus_lactis
k127_3503474	557	nt	S	AE005176.1	99.641	1	557	0	1018	557	AE005176.1 Lactococcus lactis subsp. lactis Il1403; complete genome	100	1	Bacteria;Firmicutes;Bacilli;Lactobacillales;Streptococcaceae;Lactococcus;Lactococcus_lactis
k127_3551422	1903	nt	S	CP006766.1	99.895	1	1903	0	3504	1903	CP006766.1 Lactococcus lactis subsp. lactis KLDS 4.0325 chromosome; complete genome	100	1	Bacteria;Firmicutes;Bacilli;Lactobacillales;Streptococcaceae;Lactococcus;Lactococcus_lactis
k127_3552411	727	nt	S	AE005176.1	99.725	1	727	0	1332	727	AE005176.1 Lactococcus lactis subsp. lactis Il1403; complete genome	100	1	Bacteria;Firmicutes;Bacilli;Lactobacillales;Streptococcaceae;Lactococcus;Lactococcus_lactis
k127_3555694	723	nt	S	AE005176.1	99.862	1	723	0	1330	723	AE005176.1 Lactococcus lactis subsp. lactis Il1403; complete genome	100	1	Bacteria;Firmicutes;Bacilli;Lactobacillales;Streptococcaceae;Lactococcus;Lactococcus_lactis
k127_3574316	1223	nt	S	CP015905.1	100	1	1223	0	2259	1223	CP015905.1 Lactococcus lactis subsp. lactis strain UC063; complete genome	100	1	Bacteria;Firmicutes;Bacilli;Lactobacillales;Streptococcaceae;Lactococcus;Lactococcus_lactis
k127_3597852	974	nt	S	AE005176.1	99.897	1	974	0	1794	974	AE005176.1 Lactococcus lactis subsp. lactis Il1403; complete genome	100	1	Bacteria;Firmicutes;Bacilli;Lactobacillales;Streptococcaceae;Lactococcus;Lactococcus_lactis
k127_3608102	669	db_customA	S	CP033607.1	100	1	669	0	1236	669	CP033607.1 Lactococcus lactis strain IL1403 chromosome	100	1	Bacteria;Firmicutes;Bacilli;Lactobacillales;Streptococcaceae;Lactococcus;Lactococcus_lactis
k127_3621885	879	nt	S	AE005176.1	100	1	879	0	1624	879	AE005176.1 Lactococcus lactis subsp. lactis Il1403; complete genome	100	1	Bacteria;Firmicutes;Bacilli;Lactobacillales;Streptococcaceae;Lactococcus;Lactococcus_lactis
k127_3628802	1085	nt	S	AE005176.1	100	1	1085	0	2004	1085	AE005176.1 Lactococcus lactis subsp. lactis Il1403; complete genome	100	1	Bacteria;Firmicutes;Bacilli;Lactobacillales;Streptococcaceae;Lactococcus;Lactococcus_lactis
k127_3631148	1271	nt	S	AE005176.1	99.764	1	1271	0	2331	1271	AE005176.1 Lactococcus lactis subsp. lactis Il1403; complete genome	100	1	Bacteria;Firmicutes;Bacilli;Lactobacillales;Streptococcaceae;Lactococcus;Lactococcus_lactis
k127_3631983	952	nt	S	AE005176.1	99.466	17	952	0	1700	952	AE005176.1 Lactococcus lactis subsp. lactis Il1403; complete genome	98.3193	1	Bacteria;Firmicutes;Bacilli;Lactobacillales;Streptococcaceae;Lactococcus;Lactococcus_lactis
k127_3635366	893	nt	S	CP002365.1	99.776	1	893	0	1639	893	CP002365.1 Lactococcus lactis subsp. lactis CV56; complete genome	100	1	Bacteria;Firmicutes;Bacilli;Lactobacillales;Streptococcaceae;Lactococcus;Lactococcus_lactis
k127_3679784	547	nt	S	AE005176.1	100	1	547	0	1011	547	AE005176.1 Lactococcus lactis subsp. lactis Il1403; complete genome	100	1	Bacteria;Firmicutes;Bacilli;Lactobacillales;Streptococcaceae;Lactococcus;Lactococcus_lactis
k127_3702593	774	nt	S	CP002365.1	100	1	774	0	1430	774	CP002365.1 Lactococcus lactis subsp. lactis CV56; complete genome	100	1	Bacteria;Firmicutes;Bacilli;Lactobacillales;Streptococcaceae;Lactococcus;Lactococcus_lactis
k127_3712999	1413	nt	S	CP084190.1	99.929	1	1413	0	2604	1413	CP084190.1 Lactococcus lactis strain FDAARGOS_867 plasmid unnamed2	100	1	Bacteria;Firmicutes;Bacilli;Lactobacillales;Streptococcaceae;Lactococcus;Lactococcus_lactis
k127_3718481	1150	nt	S	AE005176.1	99.913	1	1150	0	2119	1150	AE005176.1 Lactococcus lactis subsp. lactis Il1403; complete genome	100	1	Bacteria;Firmicutes;Bacilli;Lactobacillales;Streptococcaceae;Lactococcus;Lactococcus_lactis
k127_3738508	774	nt	S	AE005176.1	100	1	774	0	1430	774	AE005176.1 Lactococcus lactis subsp. lactis Il1403; complete genome	100	1	Bacteria;Firmicutes;Bacilli;Lactobacillales;Streptococcaceae;Lactococcus;Lactococcus_lactis
k127_3750570	426	nt	S	AE005176.1	100	1	426	0	787	426	AE005176.1 Lactococcus lactis subsp. lactis Il1403; complete genome	100	1	Bacteria;Firmicutes;Bacilli;Lactobacillales;Streptococcaceae;Lactococcus;Lactococcus_lactis
k127_3752778	1535	nt	S	CP015895.1	99.935	1	1535	0	2830	1535	CP015895.1 Lactococcus lactis subsp. lactis strain 184; complete genome	100	1	Bacteria;Firmicutes;Bacilli;Lactobacillales;Streptococcaceae;Lactococcus;Lactococcus_lactis
k127_3768332	1616	nt	S	CP002365.1	99.876	1	1616	0	2974	1616	CP002365.1 Lactococcus lactis subsp. lactis CV56; complete genome	100	1	Bacteria;Firmicutes;Bacilli;Lactobacillales;Streptococcaceae;Lactococcus;Lactococcus_lactis
k127_3790602	1030	nt	S	CP002365.1	100	1	1030	0	1903	1030	CP002365.1 Lactococcus lactis subsp. lactis CV56; complete genome	100	1	Bacteria;Firmicutes;Bacilli;Lactobacillales;Streptococcaceae;Lactococcus;Lactococcus_lactis
k127_3800009	2182	nt	S	CP084188.1	98.92	609	2182	0	2813	2182	CP084188.1 Lactococcus lactis strain FDAARGOS_867 plasmid unnamed1; complete sequence	72.1357	2	Bacteria;Firmicutes;Bacilli;Lactobacillales;Streptococcaceae;Lactococcus;Lactococcus_lactis
k127_3836258	846	nt	S	AE005176.1	99.882	1	846	0	1557	846	AE005176.1 Lactococcus lactis subsp. lactis Il1403; complete genome	100	1	Bacteria;Firmicutes;Bacilli;Lactobacillales;Streptococcaceae;Lactococcus;Lactococcus_lactis
k127_3860780	482	nt	S	AE005176.1	100	1	482	0	891	482	AE005176.1 Lactococcus lactis subsp. lactis Il1403; complete genome	100	1	Bacteria;Firmicutes;Bacilli;Lactobacillales;Streptococcaceae;Lactococcus;Lactococcus_lactis
k127_3862321	1440	nt	S	CP015896.1	99.861	1	1440	0	2649	1440	CP015896.1 Lactococcus lactis subsp. lactis strain 229; complete genome	100	1	Bacteria;Firmicutes;Bacilli;Lactobacillales;Streptococcaceae;Lactococcus;Lactococcus_lactis
k127_3893716	1201	nt	S	AE005176.1	100	2	1201	0	2217	1201	AE005176.1 Lactococcus lactis subsp. lactis Il1403; complete genome	99.9167	1	Bacteria;Firmicutes;Bacilli;Lactobacillales;Streptococcaceae;Lactococcus;Lactococcus_lactis
k127_3898741	1787	nt	S	CP015895.1	99.88	125	1787	0	3061	1787	CP015895.1 Lactococcus lactis subsp. lactis strain 184; complete genome	93.061	1	Bacteria;Firmicutes;Bacilli;Lactobacillales;Streptococcaceae;Lactococcus;Lactococcus_lactis
k127_389942	681	nt	S	AE005176.1	100	1	681	0	1258	681	AE005176.1 Lactococcus lactis subsp. lactis Il1403; complete genome	100	1	Bacteria;Firmicutes;Bacilli;Lactobacillales;Streptococcaceae;Lactococcus;Lactococcus_lactis
k127_3920984	416	nt	S	AE005176.1	100	1	416	0	769	416	AE005176.1 Lactococcus lactis subsp. lactis Il1403; complete genome	100	1	Bacteria;Firmicutes;Bacilli;Lactobacillales;Streptococcaceae;Lactococcus;Lactococcus_lactis
k127_3926636	470	nt	S	AE005176.1	100	1	470	0	869	470	AE005176.1 Lactococcus lactis subsp. lactis Il1403; complete genome	100	1	Bacteria;Firmicutes;Bacilli;Lactobacillales;Streptococcaceae;Lactococcus;Lactococcus_lactis
k127_394742	1367	db_customA	S	CP033607.1	99.707	1	1367	0	2503	1367	CP033607.1 Lactococcus lactis strain IL1403 chromosome	100	1	Bacteria;Firmicutes;Bacilli;Lactobacillales;Streptococcaceae;Lactococcus;Lactococcus_lactis
k127_396806	890	nt	S	CP002365.1	97.75	2	890	0	1531	890	CP002365.1 Lactococcus lactis subsp. lactis CV56; complete genome	99.8876	1	Bacteria;Firmicutes;Bacilli;Lactobacillales;Streptococcaceae;Lactococcus;Lactococcus_lactis
k127_4011810	769	nt	S	AE005176.1	99.87	1	769	0	1415	769	AE005176.1 Lactococcus lactis subsp. lactis Il1403; complete genome	100	1	Bacteria;Firmicutes;Bacilli;Lactobacillales;Streptococcaceae;Lactococcus;Lactococcus_lactis
k127_4022792	586	nt	S	CP002365.1	99.829	1	586	0	1077	586	CP002365.1 Lactococcus lactis subsp. lactis CV56; complete genome	100	1	Bacteria;Firmicutes;Bacilli;Lactobacillales;Streptococcaceae;Lactococcus;Lactococcus_lactis
k127_402555	523	nt	S	AE005176.1	99.809	1	523	0	961	523	AE005176.1 Lactococcus lactis subsp. lactis Il1403; complete genome	100	1	Bacteria;Firmicutes;Bacilli;Lactobacillales;Streptococcaceae;Lactococcus;Lactococcus_lactis
k127_4032657	708	nt	S	AE005176.1	100	1	708	0	1308	708	AE005176.1 Lactococcus lactis subsp. lactis Il1403; complete genome	100	1	Bacteria;Firmicutes;Bacilli;Lactobacillales;Streptococcaceae;Lactococcus;Lactococcus_lactis
k127_4064701	415	nt	S	AE005176.1	100	1	415	0	767	415	AE005176.1 Lactococcus lactis subsp. lactis Il1403; complete genome	100	1	Bacteria;Firmicutes;Bacilli;Lactobacillales;Streptococcaceae;Lactococcus;Lactococcus_lactis
k127_4065048	777	nt	S	AE005176.1	99.871	1	777	0	1430	777	AE005176.1 Lactococcus lactis subsp. lactis Il1403; complete genome	100	1	Bacteria;Firmicutes;Bacilli;Lactobacillales;Streptococcaceae;Lactococcus;Lactococcus_lactis
k127_4065754	1001	nt	S	CP015896.1	99.9	1	1001	0	1844	1001	CP015896.1 Lactococcus lactis subsp. lactis strain 229; complete genome	100	1	Bacteria;Firmicutes;Bacilli;Lactobacillales;Streptococcaceae;Lactococcus;Lactococcus_lactis
k127_4101736	919	nt	S	CP015897.1	99.128	3	919	0	1648	919	CP015897.1 Lactococcus lactis subsp. lactis strain 275; complete genome	99.7824	1	Bacteria;Firmicutes;Bacilli;Lactobacillales;Streptococcaceae;Lactococcus;Lactococcus_lactis
k127_4182131	938	nt	S	HM197723.1	99.787	1	938	0	1722	938	HM197723.1 Lactococcus lactis subsp. lactis strain IL594 plasmid pIL7; complete sequence	100	1	Bacteria;Firmicutes;Bacilli;Lactobacillales;Streptococcaceae;Lactococcus;Lactococcus_lactis
k127_4190473	812	nt	S	AE005176.1	99.877	1	812	0	1495	812	AE005176.1 Lactococcus lactis subsp. lactis Il1403; complete genome	100	1	Bacteria;Firmicutes;Bacilli;Lactobacillales;Streptococcaceae;Lactococcus;Lactococcus_lactis
k127_421912	717	nt	S	AE005176.1	99.861	1	717	0	1319	717	AE005176.1 Lactococcus lactis subsp. lactis Il1403; complete genome	100	1	Bacteria;Firmicutes;Bacilli;Lactobacillales;Streptococcaceae;Lactococcus;Lactococcus_lactis
k127_4221537	842	nt	S	AE005176.1	100	1	842	0	1555	842	AE005176.1 Lactococcus lactis subsp. lactis Il1403; complete genome	100	1	Bacteria;Firmicutes;Bacilli;Lactobacillales;Streptococcaceae;Lactococcus;Lactococcus_lactis
k127_4233457	995	nt	S	AE005176.1	99.899	1	995	0	1832	995	AE005176.1 Lactococcus lactis subsp. lactis Il1403; complete genome	100	1	Bacteria;Firmicutes;Bacilli;Lactobacillales;Streptococcaceae;Lactococcus;Lactococcus_lactis
k127_4235185	510	db_customA	S	CP033607.1	100	1	510	0	942	510	CP033607.1 Lactococcus lactis strain IL1403 chromosome	100	1	Bacteria;Firmicutes;Bacilli;Lactobacillales;Streptococcaceae;Lactococcus;Lactococcus_lactis
k127_4273763	1903	db_customA	S	CP033607.1	99.842	1	1903	0	3498	1903	CP033607.1 Lactococcus lactis strain IL1403 chromosome	100	1	Bacteria;Firmicutes;Bacilli;Lactobacillales;Streptococcaceae;Lactococcus;Lactococcus_lactis
k127_4280315	1177	nt	S	CP064835.1	99.745	1	1177	0	2158	1177	CP064835.1 Lactococcus lactis subsp. lactis strain DRC3 chromosome; complete genome	100	1	Bacteria;Firmicutes;Bacilli;Lactobacillales;Streptococcaceae;Lactococcus;Lactococcus_lactis
k127_4294563	763	nt	S	CP002365.1	98.123	1	746	0	1301	763	CP002365.1 Lactococcus lactis subsp. lactis CV56; complete genome	97.772	1	Bacteria;Firmicutes;Bacilli;Lactobacillales;Streptococcaceae;Lactococcus;Lactococcus_lactis
k127_4310500	635	nt	S	CP015895.1	97.48	1	635	0	1085	635	CP015895.1 Lactococcus lactis subsp. lactis strain 184; complete genome	100	1	Bacteria;Firmicutes;Bacilli;Lactobacillales;Streptococcaceae;Lactococcus;Lactococcus_lactis
k127_4321426	971	nt	S	AE005176.1	99.691	1	971	0	1777	971	AE005176.1 Lactococcus lactis subsp. lactis Il1403; complete genome	100	1	Bacteria;Firmicutes;Bacilli;Lactobacillales;Streptococcaceae;Lactococcus;Lactococcus_lactis
k127_4321930	431	db_customA	S	CP033607.1	100	1	431	0	797	431	CP033607.1 Lactococcus lactis strain IL1403 chromosome	100	1	Bacteria;Firmicutes;Bacilli;Lactobacillales;Streptococcaceae;Lactococcus;Lactococcus_lactis
k127_4328847	1228	nt	S	CP016716.1	99.829	1	1172	0	2154	1228	CP016716.1 Lactococcus lactis subsp. lactis strain UC063 plasmid pUC063B; complete sequence	95.4397	1	Bacteria;Firmicutes;Bacilli;Lactobacillales;Streptococcaceae;Lactococcus;Lactococcus_lactis
k127_4329666	708	nt	S	AE005176.1	100	1	708	0	1308	708	AE005176.1 Lactococcus lactis subsp. lactis Il1403; complete genome	100	1	Bacteria;Firmicutes;Bacilli;Lactobacillales;Streptococcaceae;Lactococcus;Lactococcus_lactis
k127_4342820	647	nt	S	AE005176.1	99.845	1	647	0	1190	647	AE005176.1 Lactococcus lactis subsp. lactis Il1403; complete genome	100	1	Bacteria;Firmicutes;Bacilli;Lactobacillales;Streptococcaceae;Lactococcus;Lactococcus_lactis
k127_4342960	829	nt	S	AE005176.1	98.673	1	829	0	1471	829	AE005176.1 Lactococcus lactis subsp. lactis Il1403; complete genome	100	1	Bacteria;Firmicutes;Bacilli;Lactobacillales;Streptococcaceae;Lactococcus;Lactococcus_lactis
k127_4345384	802	nt	S	AE005176.1	99.875	1	802	0	1476	802	AE005176.1 Lactococcus lactis subsp. lactis Il1403; complete genome	100	1	Bacteria;Firmicutes;Bacilli;Lactobacillales;Streptococcaceae;Lactococcus;Lactococcus_lactis
k127_4368178	1005	nt	S	AE005176.1	100	1	1005	0	1857	1005	AE005176.1 Lactococcus lactis subsp. lactis Il1403; complete genome	100	1	Bacteria;Firmicutes;Bacilli;Lactobacillales;Streptococcaceae;Lactococcus;Lactococcus_lactis
k127_4382283	1601	nt	S	CP016699.1	99.25	1	1601	0	2891	1601	CP016699.1 Lactococcus lactis subsp. lactis strain 275 plasmid p275A; complete sequence	100	1	Bacteria;Firmicutes;Bacilli;Lactobacillales;Streptococcaceae;Lactococcus;Lactococcus_lactis
k127_4388566	342	nt	S	AE005176.1	100	1	342	6.95e-177	632	342	AE005176.1 Lactococcus lactis subsp. lactis Il1403; complete genome	100	1	Bacteria;Firmicutes;Bacilli;Lactobacillales;Streptococcaceae;Lactococcus;Lactococcus_lactis
k127_4394301	600	nt	S	AE005176.1	99.833	1	600	0	1103	600	AE005176.1 Lactococcus lactis subsp. lactis Il1403; complete genome	100	1	Bacteria;Firmicutes;Bacilli;Lactobacillales;Streptococcaceae;Lactococcus;Lactococcus_lactis
k127_4398696	445	nt	S	AE005176.1	99.551	1	445	0	811	445	AE005176.1 Lactococcus lactis subsp. lactis Il1403; complete genome	100	1	Bacteria;Firmicutes;Bacilli;Lactobacillales;Streptococcaceae;Lactococcus;Lactococcus_lactis
k127_4424060	1506	db_customA	S	CP033607.1	100	1	1506	0	2782	1506	CP033607.1 Lactococcus lactis strain IL1403 chromosome	100	1	Bacteria;Firmicutes;Bacilli;Lactobacillales;Streptococcaceae;Lactococcus;Lactococcus_lactis
k127_442547	1351	nt	S	CP015895.1	99.926	1	1351	0	2490	1351	CP015895.1 Lactococcus lactis subsp. lactis strain 184; complete genome	100	1	Bacteria;Firmicutes;Bacilli;Lactobacillales;Streptococcaceae;Lactococcus;Lactococcus_lactis
k127_4433827	993	nt	S	CP002365.1	99.799	1	993	0	1823	993	CP002365.1 Lactococcus lactis subsp. lactis CV56; complete genome	100	1	Bacteria;Firmicutes;Bacilli;Lactobacillales;Streptococcaceae;Lactococcus;Lactococcus_lactis
k127_4438059	1234	nt	S	AE005176.1	100	12	1234	0	2259	1234	AE005176.1 Lactococcus lactis subsp. lactis Il1403; complete genome	99.1086	1	Bacteria;Firmicutes;Bacilli;Lactobacillales;Streptococcaceae;Lactococcus;Lactococcus_lactis
k127_4458153	1707	db_customA	S	CP033607.1	100	1	1707	0	3153	1707	CP033607.1 Lactococcus lactis strain IL1403 chromosome	100	1	Bacteria;Firmicutes;Bacilli;Lactobacillales;Streptococcaceae;Lactococcus;Lactococcus_lactis
k127_4466055	952	nt	S	CP002365.1	99.79	1	952	0	1748	952	CP002365.1 Lactococcus lactis subsp. lactis CV56; complete genome	100	1	Bacteria;Firmicutes;Bacilli;Lactobacillales;Streptococcaceae;Lactococcus;Lactococcus_lactis
k127_4477096	1251	nt	S	CP015895.1	100	1	1251	0	2311	1251	CP015895.1 Lactococcus lactis subsp. lactis strain 184; complete genome	100	1	Bacteria;Firmicutes;Bacilli;Lactobacillales;Streptococcaceae;Lactococcus;Lactococcus_lactis
k127_4480966	748	nt	S	AE005176.1	99.866	1	748	0	1376	748	AE005176.1 Lactococcus lactis subsp. lactis Il1403; complete genome	100	1	Bacteria;Firmicutes;Bacilli;Lactobacillales;Streptococcaceae;Lactococcus;Lactococcus_lactis
k127_4481704	1094	db_customA	S	CP033607.1	100	1	1033	0	1908	1094	CP033607.1 Lactococcus lactis strain IL1403 chromosome	94.4241	1	Bacteria;Firmicutes;Bacilli;Lactobacillales;Streptococcaceae;Lactococcus;Lactococcus_lactis
k127_449427	1138	nt	S	AE005176.1	100	1	1138	0	2102	1138	AE005176.1 Lactococcus lactis subsp. lactis Il1403; complete genome	100	1	Bacteria;Firmicutes;Bacilli;Lactobacillales;Streptococcaceae;Lactococcus;Lactococcus_lactis
k127_4514116	1065	nt	S	AE005176.1	100	1	1065	0	1967	1065	AE005176.1 Lactococcus lactis subsp. lactis Il1403; complete genome	100	1	Bacteria;Firmicutes;Bacilli;Lactobacillales;Streptococcaceae;Lactococcus;Lactococcus_lactis
k127_4523569	539	nt	S	AE005176.1	99.443	1	539	0	979	539	AE005176.1 Lactococcus lactis subsp. lactis Il1403; complete genome	100	1	Bacteria;Firmicutes;Bacilli;Lactobacillales;Streptococcaceae;Lactococcus;Lactococcus_lactis
k127_4556655	628	nt	S	AE005176.1	99.522	1	628	0	1144	628	AE005176.1 Lactococcus lactis subsp. lactis Il1403; complete genome	100	1	Bacteria;Firmicutes;Bacilli;Lactobacillales;Streptococcaceae;Lactococcus;Lactococcus_lactis
k127_457990	399	nt	S	AE005176.1	100	1	399	0	737	399	AE005176.1 Lactococcus lactis subsp. lactis Il1403; complete genome	100	1	Bacteria;Firmicutes;Bacilli;Lactobacillales;Streptococcaceae;Lactococcus;Lactococcus_lactis
k127_4606333	866	nt	S	CP002365.1	99.885	1	866	0	1594	866	CP002365.1 Lactococcus lactis subsp. lactis CV56; complete genome	100	1	Bacteria;Firmicutes;Bacilli;Lactobacillales;Streptococcaceae;Lactococcus;Lactococcus_lactis
k127_4618556	962	nt	S	CP015896.1	99.896	1	962	0	1772	962	CP015896.1 Lactococcus lactis subsp. lactis strain 229; complete genome	100	1	Bacteria;Firmicutes;Bacilli;Lactobacillales;Streptococcaceae;Lactococcus;Lactococcus_lactis
k127_4640544	488	nt	S	CP015903.1	97.551	1	488	0	837	488	CP015903.1 Lactococcus lactis subsp. lactis strain UC08; complete genome	100	1	Bacteria;Firmicutes;Bacilli;Lactobacillales;Streptococcaceae;Lactococcus;Lactococcus_lactis
k127_4651498	677	nt	S	CP002365.1	100	1	677	0	1251	677	CP002365.1 Lactococcus lactis subsp. lactis CV56; complete genome	100	1	Bacteria;Firmicutes;Bacilli;Lactobacillales;Streptococcaceae;Lactococcus;Lactococcus_lactis
k127_4653097	1568	nt	S	CP002365.1	99.872	1	1568	0	2885	1568	CP002365.1 Lactococcus lactis subsp. lactis CV56; complete genome	100	1	Bacteria;Firmicutes;Bacilli;Lactobacillales;Streptococcaceae;Lactococcus;Lactococcus_lactis
k127_4672603	648	nt	S	CP015895.1	100	1	648	0	1197	648	CP015895.1 Lactococcus lactis subsp. lactis strain 184; complete genome	100	1	Bacteria;Firmicutes;Bacilli;Lactobacillales;Streptococcaceae;Lactococcus;Lactococcus_lactis
k127_4676739	1162	db_customA	S	CP033607.1	99.828	1	1162	0	2135	1162	CP033607.1 Lactococcus lactis strain IL1403 chromosome	100	1	Bacteria;Firmicutes;Bacilli;Lactobacillales;Streptococcaceae;Lactococcus;Lactococcus_lactis
k127_4691260	731	nt	S	AE005176.1	99.859	1	708	0	1303	731	AE005176.1 Lactococcus lactis subsp. lactis Il1403; complete genome	96.8536	1	Bacteria;Firmicutes;Bacilli;Lactobacillales;Streptococcaceae;Lactococcus;Lactococcus_lactis
k127_4710558	1828	nt	S	CP016716.1	99.567	443	1828	0	2527	1828	CP016716.1 Lactococcus lactis subsp. lactis strain UC063 plasmid pUC063B; complete sequence	75.8206	1	Bacteria;Firmicutes;Bacilli;Lactobacillales;Streptococcaceae;Lactococcus;Lactococcus_lactis
k127_472490	1502	nt	S	AY849557.2	98.003	1	1502	0	2608	1502	AY849557.2 Lactococcus lactis plasmid pGdh442; complete sequence	100	1	Bacteria;Firmicutes;Bacilli;Lactobacillales;Streptococcaceae;Lactococcus;Lactococcus_lactis
k127_4778726	817	nt	S	AE005176.1	99.878	1	817	0	1504	817	AE005176.1 Lactococcus lactis subsp. lactis Il1403; complete genome	100	1	Bacteria;Firmicutes;Bacilli;Lactobacillales;Streptococcaceae;Lactococcus;Lactococcus_lactis
k127_4780181	1573	nt	S	CP015895.1	99.936	1	1573	0	2900	1573	CP015895.1 Lactococcus lactis subsp. lactis strain 184; complete genome	100	1	Bacteria;Firmicutes;Bacilli;Lactobacillales;Streptococcaceae;Lactococcus;Lactococcus_lactis
k127_4782851	506	nt	S	AE005176.1	99.605	1	506	0	924	506	AE005176.1 Lactococcus lactis subsp. lactis Il1403; complete genome	100	1	Bacteria;Firmicutes;Bacilli;Lactobacillales;Streptococcaceae;Lactococcus;Lactococcus_lactis
k127_4792962	909	nt	S	AE005176.1	99.89	1	909	0	1674	909	AE005176.1 Lactococcus lactis subsp. lactis Il1403; complete genome	100	1	Bacteria;Firmicutes;Bacilli;Lactobacillales;Streptococcaceae;Lactococcus;Lactococcus_lactis
k127_4801808	2010	nt	S	CP006766.1	98.035	1	1883	0	3273	2010	CP006766.1 Lactococcus lactis subsp. lactis KLDS 4.0325 chromosome; complete genome	93.6816	1	Bacteria;Firmicutes;Bacilli;Lactobacillales;Streptococcaceae;Lactococcus;Lactococcus_lactis
k127_482377	1263	nt	S	CP015895.1	99.425	1	1217	0	2209	1263	CP015895.1 Lactococcus lactis subsp. lactis strain 184; complete genome	96.3579	1	Bacteria;Firmicutes;Bacilli;Lactobacillales;Streptococcaceae;Lactococcus;Lactococcus_lactis
k127_4842848	763	nt	S	AE005176.1	100	1	763	0	1410	763	AE005176.1 Lactococcus lactis subsp. lactis Il1403; complete genome	100	1	Bacteria;Firmicutes;Bacilli;Lactobacillales;Streptococcaceae;Lactococcus;Lactococcus_lactis
k127_487143	1373	nt	S	CP006766.1	100	1	1373	0	2536	1373	CP006766.1 Lactococcus lactis subsp. lactis KLDS 4.0325 chromosome; complete genome	100	1	Bacteria;Firmicutes;Bacilli;Lactobacillales;Streptococcaceae;Lactococcus;Lactococcus_lactis
k127_4878857	574	nt	S	AE005176.1	100	1	574	0	1061	574	AE005176.1 Lactococcus lactis subsp. lactis Il1403; complete genome	100	1	Bacteria;Firmicutes;Bacilli;Lactobacillales;Streptococcaceae;Lactococcus;Lactococcus_lactis
k127_4894650	1017	nt	S	AE005176.1	98.82	1	1017	0	1812	1017	AE005176.1 Lactococcus lactis subsp. lactis Il1403; complete genome	100	1	Bacteria;Firmicutes;Bacilli;Lactobacillales;Streptococcaceae;Lactococcus;Lactococcus_lactis
k127_4902543	563	nt	S	AE005176.1	100	1	563	0	1040	563	AE005176.1 Lactococcus lactis subsp. lactis Il1403; complete genome	100	1	Bacteria;Firmicutes;Bacilli;Lactobacillales;Streptococcaceae;Lactococcus;Lactococcus_lactis
k127_4904812	685	nt	S	CP015902.1	97.085	1	685	0	1155	685	CP015902.1 Lactococcus lactis subsp. lactis strain UC06; complete genome	100	1	Bacteria;Firmicutes;Bacilli;Lactobacillales;Streptococcaceae;Lactococcus;Lactococcus_lactis
k127_4934934	601	nt	S	CP002365.1	100	1	601	0	1110	601	CP002365.1 Lactococcus lactis subsp. lactis CV56; complete genome	100	1	Bacteria;Firmicutes;Bacilli;Lactobacillales;Streptococcaceae;Lactococcus;Lactococcus_lactis
k127_4941465	476	nt	S	AE005176.1	100	1	476	0	880	476	AE005176.1 Lactococcus lactis subsp. lactis Il1403; complete genome	100	1	Bacteria;Firmicutes;Bacilli;Lactobacillales;Streptococcaceae;Lactococcus;Lactococcus_lactis
k127_4964407	1417	db_customA	S	CP033607.1	99.435	1	1417	0	2573	1417	CP033607.1 Lactococcus lactis strain IL1403 chromosome	100	1	Bacteria;Firmicutes;Bacilli;Lactobacillales;Streptococcaceae;Lactococcus;Lactococcus_lactis
k127_4965551	849	nt	S	AF393838.1	99.882	1	849	0	1563	849	AF393838.1 Lactococcus lactis subsp. lactis tributyrin esterase (estA) gene; complete cds; atp operon; complete sequence; yscB gene; complete cds; and yscA gene; partial cds	100	1	Bacteria;Firmicutes;Bacilli;Lactobacillales;Streptococcaceae;Lactococcus;Lactococcus_lactis
k127_4965813	1726	nt	S	CP015895.1	99.768	1	1726	0	3166	1726	CP015895.1 Lactococcus lactis subsp. lactis strain 184; complete genome	100	1	Bacteria;Firmicutes;Bacilli;Lactobacillales;Streptococcaceae;Lactococcus;Lactococcus_lactis
k127_4999207	573	nt	S	AE005176.1	99.651	1	573	0	1048	573	AE005176.1 Lactococcus lactis subsp. lactis Il1403; complete genome	100	1	Bacteria;Firmicutes;Bacilli;Lactobacillales;Streptococcaceae;Lactococcus;Lactococcus_lactis
k127_5028817	1091	nt	S	AE005176.1	99.725	1	1091	0	1999	1091	AE005176.1 Lactococcus lactis subsp. lactis Il1403; complete genome	100	1	Bacteria;Firmicutes;Bacilli;Lactobacillales;Streptococcaceae;Lactococcus;Lactococcus_lactis
k127_5033058	855	nt	S	AE005176.1	100	1	855	0	1580	855	AE005176.1 Lactococcus lactis subsp. lactis Il1403; complete genome	100	1	Bacteria;Firmicutes;Bacilli;Lactobacillales;Streptococcaceae;Lactococcus;Lactococcus_lactis
k127_5037646	687	nt	S	AE005176.1	100	1	687	0	1269	687	AE005176.1 Lactococcus lactis subsp. lactis Il1403; complete genome	100	1	Bacteria;Firmicutes;Bacilli;Lactobacillales;Streptococcaceae;Lactococcus;Lactococcus_lactis
k127_5038642	1763	nt	S	CP015895.1	100	1	1763	0	3256	1763	CP015895.1 Lactococcus lactis subsp. lactis strain 184; complete genome	100	1	Bacteria;Firmicutes;Bacilli;Lactobacillales;Streptococcaceae;Lactococcus;Lactococcus_lactis
k127_5046384	923	nt	S	CP002365.1	100	1	923	0	1705	923	CP002365.1 Lactococcus lactis subsp. lactis CV56; complete genome	100	1	Bacteria;Firmicutes;Bacilli;Lactobacillales;Streptococcaceae;Lactococcus;Lactococcus_lactis
k127_5084306	1101	nt	S	AE005176.1	99.272	1	961	0	1736	1101	AE005176.1 Lactococcus lactis subsp. lactis Il1403; complete genome	87.2843	1	Bacteria;Firmicutes;Bacilli;Lactobacillales;Streptococcaceae;Lactococcus;Lactococcus_lactis
k127_5089305	1001	nt	S	AE005176.1	100	1	1001	0	1849	1001	AE005176.1 Lactococcus lactis subsp. lactis Il1403; complete genome	100	1	Bacteria;Firmicutes;Bacilli;Lactobacillales;Streptococcaceae;Lactococcus;Lactococcus_lactis
k127_5096934	1429	nt	S	AE005176.1	99.86	1	1429	0	2628	1429	AE005176.1 Lactococcus lactis subsp. lactis Il1403; complete genome	100	1	Bacteria;Firmicutes;Bacilli;Lactobacillales;Streptococcaceae;Lactococcus;Lactococcus_lactis
k127_510862	886	nt	S	AE005176.1	100	1	886	0	1637	886	AE005176.1 Lactococcus lactis subsp. lactis Il1403; complete genome	100	1	Bacteria;Firmicutes;Bacilli;Lactobacillales;Streptococcaceae;Lactococcus;Lactococcus_lactis
k127_5118675	2915	nt	S	CP061326.1	99.533	136	2915	0	5064	2915	CP061326.1 Lactococcus lactis subsp. lactis bv. diacetylactis strain S50 plasmid pS74; complete sequence	95.4374	2	Bacteria;Firmicutes;Bacilli;Lactobacillales;Streptococcaceae;Lactococcus;Lactococcus_lactis
k127_5139449	1009	nt	S	CP006766.1	99.604	1	1009	0	1842	1009	CP006766.1 Lactococcus lactis subsp. lactis KLDS 4.0325 chromosome; complete genome	100	1	Bacteria;Firmicutes;Bacilli;Lactobacillales;Streptococcaceae;Lactococcus;Lactococcus_lactis
k127_5148030	1221	nt	S	AE005176.1	99.918	1	1221	0	2250	1221	AE005176.1 Lactococcus lactis subsp. lactis Il1403; complete genome	100	1	Bacteria;Firmicutes;Bacilli;Lactobacillales;Streptococcaceae;Lactococcus;Lactococcus_lactis
k127_519384	1538	db_customA	S	CP033607.1	99.675	1	1538	0	2813	1538	CP033607.1 Lactococcus lactis strain IL1403 chromosome	100	1	Bacteria;Firmicutes;Bacilli;Lactobacillales;Streptococcaceae;Lactococcus;Lactococcus_lactis
k127_520238	1408	nt	S	AE005176.1	99.787	1	1408	0	2584	1408	AE005176.1 Lactococcus lactis subsp. lactis Il1403; complete genome	100	1	Bacteria;Firmicutes;Bacilli;Lactobacillales;Streptococcaceae;Lactococcus;Lactococcus_lactis
k127_520303	720	nt	S	AE005176.1	99.861	1	720	0	1325	720	AE005176.1 Lactococcus lactis subsp. lactis Il1403; complete genome	100	1	Bacteria;Firmicutes;Bacilli;Lactobacillales;Streptococcaceae;Lactococcus;Lactococcus_lactis
k127_5206208	675	nt	S	AE005176.1	100	1	675	0	1247	675	AE005176.1 Lactococcus lactis subsp. lactis Il1403; complete genome	100	1	Bacteria;Firmicutes;Bacilli;Lactobacillales;Streptococcaceae;Lactococcus;Lactococcus_lactis
k127_524108	1060	nt	S	CP015896.1	100	1	1060	0	1958	1060	CP015896.1 Lactococcus lactis subsp. lactis strain 229; complete genome	100	1	Bacteria;Firmicutes;Bacilli;Lactobacillales;Streptococcaceae;Lactococcus;Lactococcus_lactis
k127_5257091	891	nt	S	AE005176.1	99.888	2	891	0	1639	891	AE005176.1 Lactococcus lactis subsp. lactis Il1403; complete genome	99.8878	1	Bacteria;Firmicutes;Bacilli;Lactobacillales;Streptococcaceae;Lactococcus;Lactococcus_lactis
k127_5260044	764	nt	S	AE005176.1	99.607	1	764	0	1395	764	AE005176.1 Lactococcus lactis subsp. lactis Il1403; complete genome	100	1	Bacteria;Firmicutes;Bacilli;Lactobacillales;Streptococcaceae;Lactococcus;Lactococcus_lactis
k127_5268904	921	nt	S	CP016694.1	99.674	1	921	0	1685	921	CP016694.1 Lactococcus lactis subsp. lactis strain 229 plasmid p229A; complete sequence	100	1	Bacteria;Firmicutes;Bacilli;Lactobacillales;Streptococcaceae;Lactococcus;Lactococcus_lactis
k127_5305180	802	nt	S	AE005176.1	98.254	1	802	0	1404	802	AE005176.1 Lactococcus lactis subsp. lactis Il1403; complete genome	100	1	Bacteria;Firmicutes;Bacilli;Lactobacillales;Streptococcaceae;Lactococcus;Lactococcus_lactis
k127_5311229	829	nt	S	CP002365.1	100	1	829	0	1531	829	CP002365.1 Lactococcus lactis subsp. lactis CV56; complete genome	100	1	Bacteria;Firmicutes;Bacilli;Lactobacillales;Streptococcaceae;Lactococcus;Lactococcus_lactis
k127_5317254	1881	nt	S	CP002365.1	99.894	1	1881	0	3463	1881	CP002365.1 Lactococcus lactis subsp. lactis CV56; complete genome	100	1	Bacteria;Firmicutes;Bacilli;Lactobacillales;Streptococcaceae;Lactococcus;Lactococcus_lactis
k127_5317909	1222	nt	S	AE005176.1	99.673	1	1222	0	2235	1222	AE005176.1 Lactococcus lactis subsp. lactis Il1403; complete genome	100	1	Bacteria;Firmicutes;Bacilli;Lactobacillales;Streptococcaceae;Lactococcus;Lactococcus_lactis
k127_5345433	847	nt	S	AE005176.1	99.29	1	845	0	1528	847	AE005176.1 Lactococcus lactis subsp. lactis Il1403; complete genome	99.7639	1	Bacteria;Firmicutes;Bacilli;Lactobacillales;Streptococcaceae;Lactococcus;Lactococcus_lactis
k127_5366476	348	nt	S	AE005176.1	100	1	348	3.27e-180	643	348	AE005176.1 Lactococcus lactis subsp. lactis Il1403; complete genome	100	1	Bacteria;Firmicutes;Bacilli;Lactobacillales;Streptococcaceae;Lactococcus;Lactococcus_lactis
k127_5383483	1259	nt	S	AE005176.1	100	1	1259	0	2326	1259	AE005176.1 Lactococcus lactis subsp. lactis Il1403; complete genome	100	1	Bacteria;Firmicutes;Bacilli;Lactobacillales;Streptococcaceae;Lactococcus;Lactococcus_lactis
k127_5386429	588	nt	S	CP006766.1	98.129	1	588	0	1026	588	CP006766.1 Lactococcus lactis subsp. lactis KLDS 4.0325 chromosome; complete genome	100	1	Bacteria;Firmicutes;Bacilli;Lactobacillales;Streptococcaceae;Lactococcus;Lactococcus_lactis
k127_539097	812	nt	S	AE005176.1	99.631	1	812	0	1483	812	AE005176.1 Lactococcus lactis subsp. lactis Il1403; complete genome	100	1	Bacteria;Firmicutes;Bacilli;Lactobacillales;Streptococcaceae;Lactococcus;Lactococcus_lactis
k127_539686	1528	nt	S	LT599053.1	99.346	1	1528	0	2767	1528	LT599053.1 Lactococcus lactis subsp. lactis strain A12 genome assembly; plasmid: pA12-4	100	1	Bacteria;Firmicutes;Bacilli;Lactobacillales;Streptococcaceae;Lactococcus;Lactococcus_lactis
k127_5397717	1022	db_customA	S	CP033607.1	100	1	1022	0	1888	1022	CP033607.1 Lactococcus lactis strain IL1403 chromosome	100	1	Bacteria;Firmicutes;Bacilli;Lactobacillales;Streptococcaceae;Lactococcus;Lactococcus_lactis
k127_5411102	754	nt	S	CP015895.1	99.867	1	754	0	1387	754	CP015895.1 Lactococcus lactis subsp. lactis strain 184; complete genome	100	1	Bacteria;Firmicutes;Bacilli;Lactobacillales;Streptococcaceae;Lactococcus;Lactococcus_lactis
k127_5428784	503	nt	S	CP002365.1	100	1	503	0	929	503	CP002365.1 Lactococcus lactis subsp. lactis CV56; complete genome	100	1	Bacteria;Firmicutes;Bacilli;Lactobacillales;Streptococcaceae;Lactococcus;Lactococcus_lactis
k127_5446499	1778	nt	S	AE005176.1	99.944	1	1778	0	3278	1778	AE005176.1 Lactococcus lactis subsp. lactis Il1403; complete genome	100	1	Bacteria;Firmicutes;Bacilli;Lactobacillales;Streptococcaceae;Lactococcus;Lactococcus_lactis
k127_5461375	2381	nt	S	CP042409.1	99.367	677	1781	0	2001	2381	CP042409.1 Lactococcus lactis strain CBA3619 plasmid unnamed; complete sequence	46.4091	2	Bacteria;Firmicutes;Bacilli;Lactobacillales;Streptococcaceae;Lactococcus;Lactococcus_lactis
k127_5476170	1196	nt	S	CP016715.1	99.626	127	1196	0	1954	1196	CP016715.1 Lactococcus lactis subsp. lactis strain UC063 plasmid pUC063A; complete sequence	89.4649	1	Bacteria;Firmicutes;Bacilli;Lactobacillales;Streptococcaceae;Lactococcus;Lactococcus_lactis
k127_5485873	1448	nt	S	AE005176.1	99.517	1	1448	0	2636	1448	AE005176.1 Lactococcus lactis subsp. lactis Il1403; complete genome	100	1	Bacteria;Firmicutes;Bacilli;Lactobacillales;Streptococcaceae;Lactococcus;Lactococcus_lactis
k127_5492276	487	nt	S	AE005176.1	100	1	487	0	900	487	AE005176.1 Lactococcus lactis subsp. lactis Il1403; complete genome	100	1	Bacteria;Firmicutes;Bacilli;Lactobacillales;Streptococcaceae;Lactococcus;Lactococcus_lactis
k127_5508519	3764	nt	S	CP016716.1	99.548	4	3764	0	6850	3764	CP016716.1 Lactococcus lactis subsp. lactis strain UC063 plasmid pUC063B; complete sequence	99.9203	1	Bacteria;Firmicutes;Bacilli;Lactobacillales;Streptococcaceae;Lactococcus;Lactococcus_lactis
k127_5508996	948	db_customA	S	CP033607.1	99.367	1	948	0	1718	948	CP033607.1 Lactococcus lactis strain IL1403 chromosome	100	1	Bacteria;Firmicutes;Bacilli;Lactobacillales;Streptococcaceae;Lactococcus;Lactococcus_lactis
k127_5520042	937	nt	S	AE005176.1	99.893	1	937	0	1725	937	AE005176.1 Lactococcus lactis subsp. lactis Il1403; complete genome	100	1	Bacteria;Firmicutes;Bacilli;Lactobacillales;Streptococcaceae;Lactococcus;Lactococcus_lactis
k127_554392	1149	nt	S	CP002365.1	99.913	1	1149	0	2117	1149	CP002365.1 Lactococcus lactis subsp. lactis CV56; complete genome	100	1	Bacteria;Firmicutes;Bacilli;Lactobacillales;Streptococcaceae;Lactococcus;Lactococcus_lactis
k127_5578127	741	nt	S	AE005176.1	100	1	741	0	1369	741	AE005176.1 Lactococcus lactis subsp. lactis Il1403; complete genome	100	1	Bacteria;Firmicutes;Bacilli;Lactobacillales;Streptococcaceae;Lactococcus;Lactococcus_lactis
k127_5605707	339	nt	S	AE005176.1	98.525	1	339	6.98e-167	599	339	AE005176.1 Lactococcus lactis subsp. lactis Il1403; complete genome	100	1	Bacteria;Firmicutes;Bacilli;Lactobacillales;Streptococcaceae;Lactococcus;Lactococcus_lactis
k127_56082	956	nt	S	CP015898.1	99.895	1	956	0	1760	956	CP015898.1 Lactococcus lactis subsp. lactis strain C10; complete genome	100	1	Bacteria;Firmicutes;Bacilli;Lactobacillales;Streptococcaceae;Lactococcus;Lactococcus_lactis
k127_5652042	972	nt	S	CP006766.1	99.466	33	969	0	1703	972	CP006766.1 Lactococcus lactis subsp. lactis KLDS 4.0325 chromosome; complete genome	96.3992	1	Bacteria;Firmicutes;Bacilli;Lactobacillales;Streptococcaceae;Lactococcus;Lactococcus_lactis
k127_5662605	312	nt	S	AE005176.1	99.679	1	312	1.39e-158	571	312	AE005176.1 Lactococcus lactis subsp. lactis Il1403; complete genome	100	1	Bacteria;Firmicutes;Bacilli;Lactobacillales;Streptococcaceae;Lactococcus;Lactococcus_lactis
k127_5674620	1031	nt	S	CP002365.1	99.612	1	1031	0	1882	1031	CP002365.1 Lactococcus lactis subsp. lactis CV56; complete genome	100	1	Bacteria;Firmicutes;Bacilli;Lactobacillales;Streptococcaceae;Lactococcus;Lactococcus_lactis
k127_5716064	535	nt	S	CP002365.1	98.479	10	535	0	928	535	CP002365.1 Lactococcus lactis subsp. lactis CV56; complete genome	98.3178	1	Bacteria;Firmicutes;Bacilli;Lactobacillales;Streptococcaceae;Lactococcus;Lactococcus_lactis
k127_5776427	624	nt	S	CP032500.1	100	1	624	0	1153	624	CP032500.1 Lactococcus lactis subsp. lactis strain WM1 chromosome; complete genome	100	1	Bacteria;Firmicutes;Bacilli;Lactobacillales;Streptococcaceae;Lactococcus;Lactococcus_lactis
k127_5794652	1143	nt	S	AE005176.1	99.667	1	902	0	1650	1143	AE005176.1 Lactococcus lactis subsp. lactis Il1403; complete genome	78.9151	1	Bacteria;Firmicutes;Bacilli;Lactobacillales;Streptococcaceae;Lactococcus;Lactococcus_lactis
k127_5803580	1634	nt	S	AE005176.1	100	1	1634	0	3018	1634	AE005176.1 Lactococcus lactis subsp. lactis Il1403; complete genome	100	1	Bacteria;Firmicutes;Bacilli;Lactobacillales;Streptococcaceae;Lactococcus;Lactococcus_lactis
k127_5806914	663	nt	S	AB100790.1	100	1	663	0	1225	663	AB100790.1 Lactococcus lactis subsp. lactis bv. diacetylactis pepV for dipeptidase; complete cds; clone: pCPVL09	100	1	Bacteria;Firmicutes;Bacilli;Lactobacillales;Streptococcaceae;Lactococcus;Lactococcus_lactis
k127_5808978	589	nt	S	CP002365.1	99.83	1	589	0	1083	589	CP002365.1 Lactococcus lactis subsp. lactis CV56; complete genome	100	1	Bacteria;Firmicutes;Bacilli;Lactobacillales;Streptococcaceae;Lactococcus;Lactococcus_lactis
k127_5820064	858	nt	S	AE005176.1	100	1	858	0	1585	858	AE005176.1 Lactococcus lactis subsp. lactis Il1403; complete genome	100	1	Bacteria;Firmicutes;Bacilli;Lactobacillales;Streptococcaceae;Lactococcus;Lactococcus_lactis
k127_5824746	973	db_customA	S	CP033607.1	100	1	973	0	1797	973	CP033607.1 Lactococcus lactis strain IL1403 chromosome	100	1	Bacteria;Firmicutes;Bacilli;Lactobacillales;Streptococcaceae;Lactococcus;Lactococcus_lactis
k127_5838010	1479	db_customA	S	CP033607.1	99.73	1	1479	0	2710	1479	CP033607.1 Lactococcus lactis strain IL1403 chromosome	100	1	Bacteria;Firmicutes;Bacilli;Lactobacillales;Streptococcaceae;Lactococcus;Lactococcus_lactis
k127_5844214	655	nt	S	AE005176.1	99.847	1	655	0	1205	655	AE005176.1 Lactococcus lactis subsp. lactis Il1403; complete genome	100	1	Bacteria;Firmicutes;Bacilli;Lactobacillales;Streptococcaceae;Lactococcus;Lactococcus_lactis
k127_5881250	1224	nt	S	AE005176.1	99.918	1	1224	0	2255	1224	AE005176.1 Lactococcus lactis subsp. lactis Il1403; complete genome	100	1	Bacteria;Firmicutes;Bacilli;Lactobacillales;Streptococcaceae;Lactococcus;Lactococcus_lactis
k127_5893454	1103	nt	S	CP006766.1	99.728	1	1103	0	2021	1103	CP006766.1 Lactococcus lactis subsp. lactis KLDS 4.0325 chromosome; complete genome	100	1	Bacteria;Firmicutes;Bacilli;Lactobacillales;Streptococcaceae;Lactococcus;Lactococcus_lactis
k127_58953	1019	nt	S	AE005176.1	99.902	1	1019	0	1877	1019	AE005176.1 Lactococcus lactis subsp. lactis Il1403; complete genome	100	1	Bacteria;Firmicutes;Bacilli;Lactobacillales;Streptococcaceae;Lactococcus;Lactococcus_lactis
k127_5903185	10085	nt	S	CP064836.1	99.941	1	10085	0	18591	10085	CP064836.1 Lactococcus lactis subsp. lactis strain DRC3 plasmid pDRC3A; complete sequence	100	1	Bacteria;Firmicutes;Bacilli;Lactobacillales;Streptococcaceae;Lactococcus;Lactococcus_lactis
k127_5911541	1062	nt	S	AE005176.1	100	1	1062	0	1962	1062	AE005176.1 Lactococcus lactis subsp. lactis Il1403; complete genome	100	1	Bacteria;Firmicutes;Bacilli;Lactobacillales;Streptococcaceae;Lactococcus;Lactococcus_lactis
k127_5923871	549	nt	S	AE005176.1	99.818	1	549	0	1009	549	AE005176.1 Lactococcus lactis subsp. lactis Il1403; complete genome	100	1	Bacteria;Firmicutes;Bacilli;Lactobacillales;Streptococcaceae;Lactococcus;Lactococcus_lactis
k127_5924508	425	nt	S	AE005176.1	100	1	422	0	780	425	AE005176.1 Lactococcus lactis subsp. lactis Il1403; complete genome	99.2941	1	Bacteria;Firmicutes;Bacilli;Lactobacillales;Streptococcaceae;Lactococcus;Lactococcus_lactis
k127_5950746	698	nt	S	CP053671.2	99.713	1	698	0	1279	698	CP053671.2 Lactococcus lactis subsp. lactis strain G121 chromosome; complete genome	100	1	Bacteria;Firmicutes;Bacilli;Lactobacillales;Streptococcaceae;Lactococcus;Lactococcus_lactis
k127_5968187	1006	nt	S	CP002365.1	99.801	1	1006	0	1847	1006	CP002365.1 Lactococcus lactis subsp. lactis CV56; complete genome	100	1	Bacteria;Firmicutes;Bacilli;Lactobacillales;Streptococcaceae;Lactococcus;Lactococcus_lactis
k127_5968292	1028	db_customA	S	CP033607.1	100	1	1028	0	1899	1028	CP033607.1 Lactococcus lactis strain IL1403 chromosome	100	1	Bacteria;Firmicutes;Bacilli;Lactobacillales;Streptococcaceae;Lactococcus;Lactococcus_lactis
k127_5981414	933	nt	S	AE005176.1	100	1	933	0	1724	933	AE005176.1 Lactococcus lactis subsp. lactis Il1403; complete genome	100	1	Bacteria;Firmicutes;Bacilli;Lactobacillales;Streptococcaceae;Lactococcus;Lactococcus_lactis
k127_5984551	943	db_customA	S	CP033607.1	99.788	1	943	0	1729	943	CP033607.1 Lactococcus lactis strain IL1403 chromosome	100	1	Bacteria;Firmicutes;Bacilli;Lactobacillales;Streptococcaceae;Lactococcus;Lactococcus_lactis
k127_5995886	824	nt	S	AE005176.1	100	1	824	0	1522	824	AE005176.1 Lactococcus lactis subsp. lactis Il1403; complete genome	100	1	Bacteria;Firmicutes;Bacilli;Lactobacillales;Streptococcaceae;Lactococcus;Lactococcus_lactis
k127_6004603	1039	db_customA	S	CP033607.1	100	1	1039	0	1919	1039	CP033607.1 Lactococcus lactis strain IL1403 chromosome	100	1	Bacteria;Firmicutes;Bacilli;Lactobacillales;Streptococcaceae;Lactococcus;Lactococcus_lactis
k127_6007725	776	nt	S	CP016699.1	100	1	776	0	1434	776	CP016699.1 Lactococcus lactis subsp. lactis strain 275 plasmid p275A; complete sequence	100	1	Bacteria;Firmicutes;Bacilli;Lactobacillales;Streptococcaceae;Lactococcus;Lactococcus_lactis
k127_6013295	796	nt	S	CP002365.1	100	1	716	0	1323	796	CP002365.1 Lactococcus lactis subsp. lactis CV56; complete genome	89.9497	1	Bacteria;Firmicutes;Bacilli;Lactobacillales;Streptococcaceae;Lactococcus;Lactococcus_lactis
k127_6047548	977	db_customA	S	CP033607.1	99.488	1	977	0	1777	977	CP033607.1 Lactococcus lactis strain IL1403 chromosome	100	1	Bacteria;Firmicutes;Bacilli;Lactobacillales;Streptococcaceae;Lactococcus;Lactococcus_lactis
k127_6049043	457	nt	S	AE005176.1	100	1	398	0	736	457	AE005176.1 Lactococcus lactis subsp. lactis Il1403; complete genome	87.0897	1	Bacteria;Firmicutes;Bacilli;Lactobacillales;Streptococcaceae;Lactococcus;Lactococcus_lactis
k127_6056163	1222	nt	S	AE005176.1	99.918	1	1222	0	2252	1222	AE005176.1 Lactococcus lactis subsp. lactis Il1403; complete genome	100	1	Bacteria;Firmicutes;Bacilli;Lactobacillales;Streptococcaceae;Lactococcus;Lactococcus_lactis
k127_6059058	3129	nt	S	CP015897.1	99.6	1	2751	0	5020	3129	CP015897.1 Lactococcus lactis subsp. lactis strain 275; complete genome	87.9514	1	Bacteria;Firmicutes;Bacilli;Lactobacillales;Streptococcaceae;Lactococcus;Lactococcus_lactis
k127_6065803	394	nt	S	AE005176.1	99.746	1	394	0	723	394	AE005176.1 Lactococcus lactis subsp. lactis Il1403; complete genome	100	1	Bacteria;Firmicutes;Bacilli;Lactobacillales;Streptococcaceae;Lactococcus;Lactococcus_lactis
k127_6078090	981	nt	S	AE005176.1	100	1	981	0	1812	981	AE005176.1 Lactococcus lactis subsp. lactis Il1403; complete genome	100	1	Bacteria;Firmicutes;Bacilli;Lactobacillales;Streptococcaceae;Lactococcus;Lactococcus_lactis
k127_6101766	1281	nt	S	AE005176.1	99.766	1	1281	0	2350	1281	AE005176.1 Lactococcus lactis subsp. lactis Il1403; complete genome	100	1	Bacteria;Firmicutes;Bacilli;Lactobacillales;Streptococcaceae;Lactococcus;Lactococcus_lactis
k127_6104626	609	nt	S	AE005176.1	100	1	609	0	1125	609	AE005176.1 Lactococcus lactis subsp. lactis Il1403; complete genome	100	1	Bacteria;Firmicutes;Bacilli;Lactobacillales;Streptococcaceae;Lactococcus;Lactococcus_lactis
k127_6111258	620	nt	S	AE005176.1	100	1	620	0	1146	620	AE005176.1 Lactococcus lactis subsp. lactis Il1403; complete genome	100	1	Bacteria;Firmicutes;Bacilli;Lactobacillales;Streptococcaceae;Lactococcus;Lactococcus_lactis
k127_6114683	518	nt	S	AE005176.1	100	1	518	0	957	518	AE005176.1 Lactococcus lactis subsp. lactis Il1403; complete genome	100	1	Bacteria;Firmicutes;Bacilli;Lactobacillales;Streptococcaceae;Lactococcus;Lactococcus_lactis
k127_6137854	1215	nt	S	CP006766.1	99.918	1	1215	0	2239	1215	CP006766.1 Lactococcus lactis subsp. lactis KLDS 4.0325 chromosome; complete genome	100	1	Bacteria;Firmicutes;Bacilli;Lactobacillales;Streptococcaceae;Lactococcus;Lactococcus_lactis
k127_6138339	474	nt	S	AE005176.1	99.578	1	474	0	865	474	AE005176.1 Lactococcus lactis subsp. lactis Il1403; complete genome	100	1	Bacteria;Firmicutes;Bacilli;Lactobacillales;Streptococcaceae;Lactococcus;Lactococcus_lactis
k127_6138526	864	nt	S	AE005176.1	100	1	864	0	1596	864	AE005176.1 Lactococcus lactis subsp. lactis Il1403; complete genome	100	1	Bacteria;Firmicutes;Bacilli;Lactobacillales;Streptococcaceae;Lactococcus;Lactococcus_lactis
k127_6145753	474	nt	S	AE005176.1	99.789	1	474	0	870	474	AE005176.1 Lactococcus lactis subsp. lactis Il1403; complete genome	100	1	Bacteria;Firmicutes;Bacilli;Lactobacillales;Streptococcaceae;Lactococcus;Lactococcus_lactis
k127_6239997	738	nt	S	CP015896.1	100	1	738	0	1363	738	CP015896.1 Lactococcus lactis subsp. lactis strain 229; complete genome	100	1	Bacteria;Firmicutes;Bacilli;Lactobacillales;Streptococcaceae;Lactococcus;Lactococcus_lactis
k127_6243554	1018	nt	S	CP064835.1	99.509	1	1018	0	1853	1018	CP064835.1 Lactococcus lactis subsp. lactis strain DRC3 chromosome; complete genome	100	1	Bacteria;Firmicutes;Bacilli;Lactobacillales;Streptococcaceae;Lactococcus;Lactococcus_lactis
k127_6246055	3866	nt	S	CP029293.1	99.586	1	3866	0	7051	3866	CP029293.1 Lactococcus lactis subsp. lactis KLDS 4.0325 plasmid unnamed6	100	1	Bacteria;Firmicutes;Bacilli;Lactobacillales;Streptococcaceae;Lactococcus;Lactococcus_lactis
k127_6247535	843	nt	S	AE005176.1	100	1	843	0	1557	843	AE005176.1 Lactococcus lactis subsp. lactis Il1403; complete genome	100	1	Bacteria;Firmicutes;Bacilli;Lactobacillales;Streptococcaceae;Lactococcus;Lactococcus_lactis
k127_6270511	1987	nt	S	CP015897.1	99.799	1	1987	0	3648	1987	CP015897.1 Lactococcus lactis subsp. lactis strain 275; complete genome	100	1	Bacteria;Firmicutes;Bacilli;Lactobacillales;Streptococcaceae;Lactococcus;Lactococcus_lactis
k127_627533	647	nt	S	CP015898.1	100	1	647	0	1195	647	CP015898.1 Lactococcus lactis subsp. lactis strain C10; complete genome	100	1	Bacteria;Firmicutes;Bacilli;Lactobacillales;Streptococcaceae;Lactococcus;Lactococcus_lactis
k127_6278867	1317	nt	S	AE005176.1	99.924	1	1317	0	2427	1317	AE005176.1 Lactococcus lactis subsp. lactis Il1403; complete genome	100	1	Bacteria;Firmicutes;Bacilli;Lactobacillales;Streptococcaceae;Lactococcus;Lactococcus_lactis
k127_6283495	568	nt	S	AE005176.1	100	1	568	0	1050	568	AE005176.1 Lactococcus lactis subsp. lactis Il1403; complete genome	100	1	Bacteria;Firmicutes;Bacilli;Lactobacillales;Streptococcaceae;Lactococcus;Lactococcus_lactis
k127_6291148	624	nt	S	CP015895.1	100	1	624	0	1153	624	CP015895.1 Lactococcus lactis subsp. lactis strain 184; complete genome	100	1	Bacteria;Firmicutes;Bacilli;Lactobacillales;Streptococcaceae;Lactococcus;Lactococcus_lactis
k127_6294915	1360	nt	S	AE005176.1	99.853	1	1360	0	2501	1360	AE005176.1 Lactococcus lactis subsp. lactis Il1403; complete genome	100	1	Bacteria;Firmicutes;Bacilli;Lactobacillales;Streptococcaceae;Lactococcus;Lactococcus_lactis
k127_6310045	2461	nt	S	CP016700.1	97.52	1	2413	0	4124	2461	CP016700.1 Lactococcus lactis subsp. lactis strain 275 plasmid p275B; complete sequence	98.2934	1	Bacteria;Firmicutes;Bacilli;Lactobacillales;Streptococcaceae;Lactococcus;Lactococcus_lactis
k127_633804	1364	nt	S	CP015895.1	99.927	1	1364	0	2514	1364	CP015895.1 Lactococcus lactis subsp. lactis strain 184; complete genome	100	1	Bacteria;Firmicutes;Bacilli;Lactobacillales;Streptococcaceae;Lactococcus;Lactococcus_lactis
k127_634992	1051	nt	S	AE005176.1	99.81	1	1051	0	1930	1051	AE005176.1 Lactococcus lactis subsp. lactis Il1403; complete genome	100	1	Bacteria;Firmicutes;Bacilli;Lactobacillales;Streptococcaceae;Lactococcus;Lactococcus_lactis
k127_6356872	2091	db_customA	S	CP033607.1	99.187	1	2091	0	3768	2091	CP033607.1 Lactococcus lactis strain IL1403 chromosome	100	1	Bacteria;Firmicutes;Bacilli;Lactobacillales;Streptococcaceae;Lactococcus;Lactococcus_lactis
k127_636759	885	nt	S	CP006766.1	99.887	1	885	0	1629	885	CP006766.1 Lactococcus lactis subsp. lactis KLDS 4.0325 chromosome; complete genome	100	1	Bacteria;Firmicutes;Bacilli;Lactobacillales;Streptococcaceae;Lactococcus;Lactococcus_lactis
k127_6398437	737	nt	S	CP064835.1	99.864	1	737	0	1356	737	CP064835.1 Lactococcus lactis subsp. lactis strain DRC3 chromosome; complete genome	100	1	Bacteria;Firmicutes;Bacilli;Lactobacillales;Streptococcaceae;Lactococcus;Lactococcus_lactis
k127_6405977	993	nt	S	CP015902.1	99.33	394	990	0	1081	993	CP015902.1 Lactococcus lactis subsp. lactis strain UC06; complete genome	60.1208	1	Bacteria;Firmicutes;Bacilli;Lactobacillales;Streptococcaceae;Lactococcus;Lactococcus_lactis
k127_6441953	1457	nt	S	CP015898.1	99.657	1	1457	0	2663	1457	CP015898.1 Lactococcus lactis subsp. lactis strain C10; complete genome	100	1	Bacteria;Firmicutes;Bacilli;Lactobacillales;Streptococcaceae;Lactococcus;Lactococcus_lactis
k127_6478697	1299	nt	S	CP002365.1	98.306	1	1299	0	2278	1299	CP002365.1 Lactococcus lactis subsp. lactis CV56; complete genome	100	1	Bacteria;Firmicutes;Bacilli;Lactobacillales;Streptococcaceae;Lactococcus;Lactococcus_lactis
k127_6501377	1165	nt	S	AE005176.1	100	1	1165	0	2152	1165	AE005176.1 Lactococcus lactis subsp. lactis Il1403; complete genome	100	1	Bacteria;Firmicutes;Bacilli;Lactobacillales;Streptococcaceae;Lactococcus;Lactococcus_lactis
k127_6501404	885	nt	S	CP066301.1	98.234	189	811	0	1088	885	CP066301.1 Lactococcus lactis strain WiKim0098 plasmid unnamed1	70.3955	1	Bacteria;Firmicutes;Bacilli;Lactobacillales;Streptococcaceae;Lactococcus;Lactococcus_lactis
k127_6503955	1098	nt	S	AE005176.1	99.909	1	1098	0	2023	1098	AE005176.1 Lactococcus lactis subsp. lactis Il1403; complete genome	100	1	Bacteria;Firmicutes;Bacilli;Lactobacillales;Streptococcaceae;Lactococcus;Lactococcus_lactis
k127_6524026	550	nt	S	AE005176.1	100	1	550	0	1016	550	AE005176.1 Lactococcus lactis subsp. lactis Il1403; complete genome	100	1	Bacteria;Firmicutes;Bacilli;Lactobacillales;Streptococcaceae;Lactococcus;Lactococcus_lactis
k127_6538374	2081	nt	S	CP084188.1	99.379	1	2081	0	3781	2081	CP084188.1 Lactococcus lactis strain FDAARGOS_867 plasmid unnamed1; complete sequence	100	1	Bacteria;Firmicutes;Bacilli;Lactobacillales;Streptococcaceae;Lactococcus;Lactococcus_lactis
k127_6574664	1038	nt	S	CP002365.1	98.94	1	1038	0	1857	1038	CP002365.1 Lactococcus lactis subsp. lactis CV56; complete genome	100	1	Bacteria;Firmicutes;Bacilli;Lactobacillales;Streptococcaceae;Lactococcus;Lactococcus_lactis
k127_657854	533	nt	S	CP015895.1	100	1	533	0	985	533	CP015895.1 Lactococcus lactis subsp. lactis strain 184; complete genome	100	1	Bacteria;Firmicutes;Bacilli;Lactobacillales;Streptococcaceae;Lactococcus;Lactococcus_lactis
k127_6605421	1324	nt	S	AE005176.1	99.924	3	1324	0	2436	1324	AE005176.1 Lactococcus lactis subsp. lactis Il1403; complete genome	99.8489	1	Bacteria;Firmicutes;Bacilli;Lactobacillales;Streptococcaceae;Lactococcus;Lactococcus_lactis
k127_6620592	4655	nt	S	CP084190.1	99.69	1	4188	0	7662	4655	CP084190.1 Lactococcus lactis strain FDAARGOS_867 plasmid unnamed2	89.9678	1	Bacteria;Firmicutes;Bacilli;Lactobacillales;Streptococcaceae;Lactococcus;Lactococcus_lactis
k127_6628498	647	nt	S	AE005176.1	99.845	1	647	0	1190	647	AE005176.1 Lactococcus lactis subsp. lactis Il1403; complete genome	100	1	Bacteria;Firmicutes;Bacilli;Lactobacillales;Streptococcaceae;Lactococcus;Lactococcus_lactis
k127_6631584	2620	nt	S	CP084188.1	98.543	14	2620	0	4602	2620	CP084188.1 Lactococcus lactis strain FDAARGOS_867 plasmid unnamed1; complete sequence	99.542	1	Bacteria;Firmicutes;Bacilli;Lactobacillales;Streptococcaceae;Lactococcus;Lactococcus_lactis
k127_6634637	932	nt	S	AE005176.1	100	1	932	0	1722	932	AE005176.1 Lactococcus lactis subsp. lactis Il1403; complete genome	100	1	Bacteria;Firmicutes;Bacilli;Lactobacillales;Streptococcaceae;Lactococcus;Lactococcus_lactis
k127_6658523	834	nt	S	AE005176.1	100	1	834	0	1541	834	AE005176.1 Lactococcus lactis subsp. lactis Il1403; complete genome	100	1	Bacteria;Firmicutes;Bacilli;Lactobacillales;Streptococcaceae;Lactococcus;Lactococcus_lactis
k127_6677579	1157	nt	S	AE005176.1	98.617	1	1157	0	2049	1157	AE005176.1 Lactococcus lactis subsp. lactis Il1403; complete genome	100	1	Bacteria;Firmicutes;Bacilli;Lactobacillales;Streptococcaceae;Lactococcus;Lactococcus_lactis
k127_6722152	699	nt	S	CP015902.1	100	1	699	0	1291	699	CP015902.1 Lactococcus lactis subsp. lactis strain UC06; complete genome	100	1	Bacteria;Firmicutes;Bacilli;Lactobacillales;Streptococcaceae;Lactococcus;Lactococcus_lactis
k127_6722986	627	nt	S	AE005176.1	100	1	627	0	1158	627	AE005176.1 Lactococcus lactis subsp. lactis Il1403; complete genome	100	1	Bacteria;Firmicutes;Bacilli;Lactobacillales;Streptococcaceae;Lactococcus;Lactococcus_lactis
k127_6724696	732	nt	S	AE005176.1	100	1	732	0	1352	732	AE005176.1 Lactococcus lactis subsp. lactis Il1403; complete genome	100	1	Bacteria;Firmicutes;Bacilli;Lactobacillales;Streptococcaceae;Lactococcus;Lactococcus_lactis
k127_6753234	580	nt	S	AE005176.1	99.483	1	580	0	1055	580	AE005176.1 Lactococcus lactis subsp. lactis Il1403; complete genome	100	1	Bacteria;Firmicutes;Bacilli;Lactobacillales;Streptococcaceae;Lactococcus;Lactococcus_lactis
k127_6754857	857	nt	S	CP006766.1	100	1	857	0	1583	857	CP006766.1 Lactococcus lactis subsp. lactis KLDS 4.0325 chromosome; complete genome	100	1	Bacteria;Firmicutes;Bacilli;Lactobacillales;Streptococcaceae;Lactococcus;Lactococcus_lactis
k127_6757291	652	nt	S	CP002365.1	100	1	652	0	1205	652	CP002365.1 Lactococcus lactis subsp. lactis CV56; complete genome	100	1	Bacteria;Firmicutes;Bacilli;Lactobacillales;Streptococcaceae;Lactococcus;Lactococcus_lactis
k127_6778288	559	nt	S	AE005176.1	99.821	1	559	0	1027	559	AE005176.1 Lactococcus lactis subsp. lactis Il1403; complete genome	100	1	Bacteria;Firmicutes;Bacilli;Lactobacillales;Streptococcaceae;Lactococcus;Lactococcus_lactis
k127_6799939	806	nt	S	CP002365.1	99.132	1	806	0	1450	806	CP002365.1 Lactococcus lactis subsp. lactis CV56; complete genome	100	1	Bacteria;Firmicutes;Bacilli;Lactobacillales;Streptococcaceae;Lactococcus;Lactococcus_lactis
k127_6858132	476	nt	S	AE005176.1	98.95	1	476	0	852	476	AE005176.1 Lactococcus lactis subsp. lactis Il1403; complete genome	100	1	Bacteria;Firmicutes;Bacilli;Lactobacillales;Streptococcaceae;Lactococcus;Lactococcus_lactis
k127_6877180	1233	nt	S	CP006766.1	99.919	1	1233	0	2272	1233	CP006766.1 Lactococcus lactis subsp. lactis KLDS 4.0325 chromosome; complete genome	100	1	Bacteria;Firmicutes;Bacilli;Lactobacillales;Streptococcaceae;Lactococcus;Lactococcus_lactis
k127_6882956	14932	nt	S	CP065733.1	97.904	4987	14932	0	17230	14932	CP065733.1 Lactococcus lactis strain FDAARGOS_866 plasmid unnamed3; complete sequence	66.7627	2	Bacteria;Firmicutes;Bacilli;Lactobacillales;Streptococcaceae;Lactococcus;Lactococcus_lactis
k127_6914134	681	nt	S	AE005176.1	99.706	1	681	0	1247	681	AE005176.1 Lactococcus lactis subsp. lactis Il1403; complete genome	100	1	Bacteria;Firmicutes;Bacilli;Lactobacillales;Streptococcaceae;Lactococcus;Lactococcus_lactis
k127_6919940	706	nt	S	CP002365.1	99.433	1	706	0	1282	706	CP002365.1 Lactococcus lactis subsp. lactis CV56; complete genome	100	1	Bacteria;Firmicutes;Bacilli;Lactobacillales;Streptococcaceae;Lactococcus;Lactococcus_lactis
k127_6939309	5890	nt	S	CP016735.1	99.949	1	5890	0	10861	5890	CP016735.1 Lactococcus lactis subsp. lactis strain UC06 plasmid pUC06B; complete sequence	100	1	Bacteria;Firmicutes;Bacilli;Lactobacillales;Streptococcaceae;Lactococcus;Lactococcus_lactis
k127_6958175	1181	nt	S	AE005176.1	100	1	1181	0	2182	1181	AE005176.1 Lactococcus lactis subsp. lactis Il1403; complete genome	100	1	Bacteria;Firmicutes;Bacilli;Lactobacillales;Streptococcaceae;Lactococcus;Lactococcus_lactis
k127_6971443	776	nt	S	CP002365.1	99.485	1	776	0	1411	776	CP002365.1 Lactococcus lactis subsp. lactis CV56; complete genome	100	1	Bacteria;Firmicutes;Bacilli;Lactobacillales;Streptococcaceae;Lactococcus;Lactococcus_lactis
k127_6971580	897	nt	S	AE005176.1	100	1	897	0	1657	897	AE005176.1 Lactococcus lactis subsp. lactis Il1403; complete genome	100	1	Bacteria;Firmicutes;Bacilli;Lactobacillales;Streptococcaceae;Lactococcus;Lactococcus_lactis
k127_7006073	847	nt	S	CP024958.1	99.882	1	847	0	1559	847	CP024958.1 Lactococcus lactis subsp. lactis strain G423 chromosome; complete genome	100	1	Bacteria;Firmicutes;Bacilli;Lactobacillales;Streptococcaceae;Lactococcus;Lactococcus_lactis
k127_7014397	1194	nt	S	CP084190.1	99.916	1	1194	0	2200	1194	CP084190.1 Lactococcus lactis strain FDAARGOS_867 plasmid unnamed2	100	1	Bacteria;Firmicutes;Bacilli;Lactobacillales;Streptococcaceae;Lactococcus;Lactococcus_lactis
k127_7104155	553	nt	S	AE005176.1	100	1	553	0	1022	553	AE005176.1 Lactococcus lactis subsp. lactis Il1403; complete genome	100	1	Bacteria;Firmicutes;Bacilli;Lactobacillales;Streptococcaceae;Lactococcus;Lactococcus_lactis
k127_7115783	952	nt	S	CP015897.1	100	1	952	0	1759	952	CP015897.1 Lactococcus lactis subsp. lactis strain 275; complete genome	100	1	Bacteria;Firmicutes;Bacilli;Lactobacillales;Streptococcaceae;Lactococcus;Lactococcus_lactis
k127_7120354	703	nt	S	AE005176.1	99.857	3	703	0	1290	703	AE005176.1 Lactococcus lactis subsp. lactis Il1403; complete genome	99.7155	1	Bacteria;Firmicutes;Bacilli;Lactobacillales;Streptococcaceae;Lactococcus;Lactococcus_lactis
k127_7131966	1069	nt	S	CP015898.1	100	1	1069	0	1975	1069	CP015898.1 Lactococcus lactis subsp. lactis strain C10; complete genome	100	1	Bacteria;Firmicutes;Bacilli;Lactobacillales;Streptococcaceae;Lactococcus;Lactococcus_lactis
k127_7133891	863	nt	S	AE005176.1	99.652	1	863	0	1578	863	AE005176.1 Lactococcus lactis subsp. lactis Il1403; complete genome	100	1	Bacteria;Firmicutes;Bacilli;Lactobacillales;Streptococcaceae;Lactococcus;Lactococcus_lactis
k127_7160327	1420	nt	S	AE005176.1	100	1	1341	0	2477	1420	AE005176.1 Lactococcus lactis subsp. lactis Il1403; complete genome	94.4366	1	Bacteria;Firmicutes;Bacilli;Lactobacillales;Streptococcaceae;Lactococcus;Lactococcus_lactis
k127_7160331	858	nt	S	AE005176.1	100	1	858	0	1585	858	AE005176.1 Lactococcus lactis subsp. lactis Il1403; complete genome	100	1	Bacteria;Firmicutes;Bacilli;Lactobacillales;Streptococcaceae;Lactococcus;Lactococcus_lactis
k127_7165241	676	nt	S	CP002365.1	100	1	676	0	1249	676	CP002365.1 Lactococcus lactis subsp. lactis CV56; complete genome	100	1	Bacteria;Firmicutes;Bacilli;Lactobacillales;Streptococcaceae;Lactococcus;Lactococcus_lactis
k127_7167002	511	nt	S	AE005176.1	100	1	511	0	944	511	AE005176.1 Lactococcus lactis subsp. lactis Il1403; complete genome	100	1	Bacteria;Firmicutes;Bacilli;Lactobacillales;Streptococcaceae;Lactococcus;Lactococcus_lactis
k127_7188508	421	db_customA	S	CP033607.1	99.525	1	421	0	767	421	CP033607.1 Lactococcus lactis strain IL1403 chromosome	100	1	Bacteria;Firmicutes;Bacilli;Lactobacillales;Streptococcaceae;Lactococcus;Lactococcus_lactis
k127_7206099	1083	db_customA	S	CP033607.1	99.908	1	1083	0	1995	1083	CP033607.1 Lactococcus lactis strain IL1403 chromosome	100	1	Bacteria;Firmicutes;Bacilli;Lactobacillales;Streptococcaceae;Lactococcus;Lactococcus_lactis
k127_7207733	708	nt	S	CP002365.1	100	1	708	0	1308	708	CP002365.1 Lactococcus lactis subsp. lactis CV56; complete genome	100	1	Bacteria;Firmicutes;Bacilli;Lactobacillales;Streptococcaceae;Lactococcus;Lactococcus_lactis
k127_7237425	816	db_customA	S	CP033607.1	98.162	1	816	0	1424	816	CP033607.1 Lactococcus lactis strain IL1403 chromosome	100	1	Bacteria;Firmicutes;Bacilli;Lactobacillales;Streptococcaceae;Lactococcus;Lactococcus_lactis
k127_7261651	434	nt	S	AE005176.1	100	1	434	0	802	434	AE005176.1 Lactococcus lactis subsp. lactis Il1403; complete genome	100	1	Bacteria;Firmicutes;Bacilli;Lactobacillales;Streptococcaceae;Lactococcus;Lactococcus_lactis
k127_7275841	522	db_customA	S	CP033607.1	100	1	522	0	965	522	CP033607.1 Lactococcus lactis strain IL1403 chromosome	100	1	Bacteria;Firmicutes;Bacilli;Lactobacillales;Streptococcaceae;Lactococcus;Lactococcus_lactis
k127_73428	1061	nt	S	AE005176.1	99.679	128	1061	0	1709	1061	AE005176.1 Lactococcus lactis subsp. lactis Il1403; complete genome	88.0302	1	Bacteria;Firmicutes;Bacilli;Lactobacillales;Streptococcaceae;Lactococcus;Lactococcus_lactis
k127_74381	802	nt	S	AE005176.1	100	1	801	0	1480	802	AE005176.1 Lactococcus lactis subsp. lactis Il1403; complete genome	99.8753	1	Bacteria;Firmicutes;Bacilli;Lactobacillales;Streptococcaceae;Lactococcus;Lactococcus_lactis
k127_745517	694	nt	S	AE005176.1	99.856	1	694	0	1277	694	AE005176.1 Lactococcus lactis subsp. lactis Il1403; complete genome	100	1	Bacteria;Firmicutes;Bacilli;Lactobacillales;Streptococcaceae;Lactococcus;Lactococcus_lactis
k127_761122	1022	nt	S	CP002365.1	99.315	1	1022	0	1849	1022	CP002365.1 Lactococcus lactis subsp. lactis CV56; complete genome	100	1	Bacteria;Firmicutes;Bacilli;Lactobacillales;Streptococcaceae;Lactococcus;Lactococcus_lactis
k127_764803	382	db_customA	S	CP033607.1	100	25	382	0	662	382	CP033607.1 Lactococcus lactis strain IL1403 chromosome	93.7173	1	Bacteria;Firmicutes;Bacilli;Lactobacillales;Streptococcaceae;Lactococcus;Lactococcus_lactis
k127_775384	1042	nt	S	CP000425.1	97.965	60	1042	0	1705	1042	CP000425.1 Lactococcus lactis subsp. cremoris SK11; complete genome	94.3378	1	Bacteria;Firmicutes;Bacilli;Lactobacillales;Streptococcaceae;Lactococcus;Lactococcus_lactis
k127_79209	1668	nt	S	CP006766.1	99.64	1	1668	0	3048	1668	CP006766.1 Lactococcus lactis subsp. lactis KLDS 4.0325 chromosome; complete genome	100	1	Bacteria;Firmicutes;Bacilli;Lactobacillales;Streptococcaceae;Lactococcus;Lactococcus_lactis
k127_796680	1234	nt	S	CP002365.1	99.757	1	1234	0	2263	1234	CP002365.1 Lactococcus lactis subsp. lactis CV56; complete genome	100	1	Bacteria;Firmicutes;Bacilli;Lactobacillales;Streptococcaceae;Lactococcus;Lactococcus_lactis
k127_800972	435	nt	S	AE005176.1	100	1	432	0	798	435	AE005176.1 Lactococcus lactis subsp. lactis Il1403; complete genome	99.3103	1	Bacteria;Firmicutes;Bacilli;Lactobacillales;Streptococcaceae;Lactococcus;Lactococcus_lactis
k127_815423	489	nt	S	AE005176.1	100	1	489	0	904	489	AE005176.1 Lactococcus lactis subsp. lactis Il1403; complete genome	100	1	Bacteria;Firmicutes;Bacilli;Lactobacillales;Streptococcaceae;Lactococcus;Lactococcus_lactis
k127_816995	923	nt	S	CP006766.1	100	1	923	0	1705	923	CP006766.1 Lactococcus lactis subsp. lactis KLDS 4.0325 chromosome; complete genome	100	1	Bacteria;Firmicutes;Bacilli;Lactobacillales;Streptococcaceae;Lactococcus;Lactococcus_lactis
k127_821314	806	nt	S	AE005176.1	100	1	806	0	1489	806	AE005176.1 Lactococcus lactis subsp. lactis Il1403; complete genome	100	1	Bacteria;Firmicutes;Bacilli;Lactobacillales;Streptococcaceae;Lactococcus;Lactococcus_lactis
k127_823020	827	nt	S	AE005176.1	98.912	1	827	0	1478	827	AE005176.1 Lactococcus lactis subsp. lactis Il1403; complete genome	100	1	Bacteria;Firmicutes;Bacilli;Lactobacillales;Streptococcaceae;Lactococcus;Lactococcus_lactis
k127_869791	1777	nt	S	CP015906.1	99.944	1	1777	0	3277	1777	CP015906.1 Lactococcus lactis subsp. lactis strain UC77; complete genome	100	1	Bacteria;Firmicutes;Bacilli;Lactobacillales;Streptococcaceae;Lactococcus;Lactococcus_lactis
k127_869795	556	nt	S	AE005176.1	100	1	556	0	1027	556	AE005176.1 Lactococcus lactis subsp. lactis Il1403; complete genome	100	1	Bacteria;Firmicutes;Bacilli;Lactobacillales;Streptococcaceae;Lactococcus;Lactococcus_lactis
k127_884130	3709	nt	S	CP064836.1	98.736	1	3476	0	6180	3709	CP064836.1 Lactococcus lactis subsp. lactis strain DRC3 plasmid pDRC3A; complete sequence	93.8798	1	Bacteria;Firmicutes;Bacilli;Lactobacillales;Streptococcaceae;Lactococcus;Lactococcus_lactis
k127_886882	712	nt	S	CP002365.1	100	1	712	0	1315	712	CP002365.1 Lactococcus lactis subsp. lactis CV56; complete genome	100	1	Bacteria;Firmicutes;Bacilli;Lactobacillales;Streptococcaceae;Lactococcus;Lactococcus_lactis
k127_916095	766	nt	S	CP066300.1	97.452	433	589	1.93e-66	267	766	CP066300.1 Lactococcus lactis strain WiKim0098 chromosome	20.4961	1	Bacteria;Firmicutes;Bacilli;Lactobacillales;Streptococcaceae;Lactococcus;Lactococcus_lactis
k127_947526	737	nt	S	CP006766.1	100	1	737	0	1362	737	CP006766.1 Lactococcus lactis subsp. lactis KLDS 4.0325 chromosome; complete genome	100	1	Bacteria;Firmicutes;Bacilli;Lactobacillales;Streptococcaceae;Lactococcus;Lactococcus_lactis
k127_948204	1258	nt	S	CP002365.1	99.841	1	1258	0	2313	1258	CP002365.1 Lactococcus lactis subsp. lactis CV56; complete genome	100	1	Bacteria;Firmicutes;Bacilli;Lactobacillales;Streptococcaceae;Lactococcus;Lactococcus_lactis
k127_9719	880	nt	S	AE005176.1	99.886	1	880	0	1620	880	AE005176.1 Lactococcus lactis subsp. lactis Il1403; complete genome	100	1	Bacteria;Firmicutes;Bacilli;Lactobacillales;Streptococcaceae;Lactococcus;Lactococcus_lactis
k127_988100	884	nt	S	AE005176.1	98.952	26	884	0	1537	884	AE005176.1 Lactococcus lactis subsp. lactis Il1403; complete genome	97.1719	1	Bacteria;Firmicutes;Bacilli;Lactobacillales;Streptococcaceae;Lactococcus;Lactococcus_lactis
k127_3965590	1467	nt	S	CP048686.1	99.114	1	1467	0	2638	1467	CP048686.1 Lactococcus raffinolactis strain KACC 13441 chromosome; complete genome	100	1	Bacteria;Firmicutes;Bacilli;Lactobacillales;Streptococcaceae;Lactococcus;Lactococcus_raffinolactis
k127_5958369	1296	nt	S	CP047615.1	99.56	298	979	0	1243	1296	CP047615.1 Lactococcus raffinolactis strain Lr_19_7 plasmid pLraf_19_7_1; complete sequence	52.6235	1	Bacteria;Firmicutes;Bacilli;Lactobacillales;Streptococcaceae;Lactococcus;Lactococcus_raffinolactis
k127_4949075	6205	nt	S	LT906454.1	94.283	1	3819	0	5840	6205	LT906454.1 Streptococcus acidominimus strain NCTC11291 genome assembly; chromosome: 1	61.7405	1	Bacteria;Firmicutes;Bacilli;Lactobacillales;Streptococcaceae;Streptococcus;Streptococcus_acidominimus
k127_6391621	1247	nt	S	AP020310.1	98.943	1	1041	0	1862	1247	AP020310.1 Streptococcus agalactiae GCMC97051 DNA; complete genome	83.4804	1	Bacteria;Firmicutes;Bacilli;Lactobacillales;Streptococcaceae;Streptococcus;Streptococcus_agalactiae
k127_727941	1148	nt	S	AP020310.1	92.025	986	1148	3.86e-55	230	1148	AP020310.1 Streptococcus agalactiae GCMC97051 DNA; complete genome	14.1986	1	Bacteria;Firmicutes;Bacilli;Lactobacillales;Streptococcaceae;Streptococcus;Streptococcus_agalactiae
k127_920053	2059	nt	S	CP068056.1	96.892	1	2059	0	3448	2059	CP068056.1 Streptococcus lutetiensis strain FDAARGOS_1158 chromosome; complete genome	100	1	Bacteria;Firmicutes;Bacilli;Lactobacillales;Streptococcaceae;Streptococcus;Streptococcus_lutetiensis
k127_1618777	10034	nt	S	AP024277.1	96.044	509	963	0	741	10034	AP024277.1 Streptococcus parasuis SUT-380 DNA; complete genome	4.53458	1	Bacteria;Firmicutes;Bacilli;Lactobacillales;Streptococcaceae;Streptococcus;Streptococcus_parasuis
k127_2776914	3035	nt	S	AP024277.1	98.315	2858	3035	1e-79	313	3035	AP024277.1 Streptococcus parasuis SUT-380 DNA; complete genome	5.86491	1	Bacteria;Firmicutes;Bacilli;Lactobacillales;Streptococcaceae;Streptococcus;Streptococcus_parasuis
k127_4021845	4625	nt	S	LS483462.1	92.954	140	870	0	1066	4625	LS483462.1 Streptococcus pasteurianus strain NCTC13784 genome assembly; chromosome: 1	15.9568	1	Bacteria;Firmicutes;Bacilli;Lactobacillales;Streptococcaceae;Streptococcus;Streptococcus_pasteurianus
k127_7022810	14487	nt	S	LS483462.1	97.727	10386	10473	1.12e-30	152	14487	LS483462.1 Streptococcus pasteurianus strain NCTC13784 genome assembly; chromosome: 1	0.607441	1	Bacteria;Firmicutes;Bacilli;Lactobacillales;Streptococcaceae;Streptococcus;Streptococcus_pasteurianus
k127_2285766	8473	nt	S	CP070236.1	90.587	1159	2218	0	1408	8473	CP070236.1 Streptococcus porcinus strain Colony573 chromosome	12.6638	1	Bacteria;Firmicutes;Bacilli;Lactobacillales;Streptococcaceae;Streptococcus;Streptococcus_porcinus
k127_1534876	1407	nt	S	CP000261.1	95.17	1	1407	0	2220	1407	CP000261.1 Streptococcus pyogenes MGAS2096; complete genome	100	1	Bacteria;Firmicutes;Bacilli;Lactobacillales;Streptococcaceae;Streptococcus;Streptococcus_pyogenes
k127_5196910	419	nt	S	AP023392.1	100	1	127	2.86e-57	235	419	AP023392.1 Streptococcus suis DAT300 DNA; complete genome	30.3103	1	Bacteria;Firmicutes;Bacilli;Lactobacillales;Streptococcaceae;Streptococcus;Streptococcus_suis
k127_2122820	1345	nt	S	LR822008.1	97.491	274	1345	0	1832	1345	LR822008.1 Streptococcus thermophilus isolate STH_CIRM_18 genome assembly; chromosome: STHERMO	80	1	Bacteria;Firmicutes;Bacilli;Lactobacillales;Streptococcaceae;Streptococcus;Streptococcus_thermophilus
k127_2431588	2208	nt	S	CP016877.1	97.178	220	2017	0	3046	2208	CP016877.1 Streptococcus thermophilus strain KLDS 3.1003; complete genome	81.8388	1	Bacteria;Firmicutes;Bacilli;Lactobacillales;Streptococcaceae;Streptococcus;Streptococcus_thermophilus
k127_336563	520	nt	S	CP025399.1	99.231	1	520	0	939	520	CP025399.1 Streptococcus thermophilus strain GABA chromosome; complete genome	100	1	Bacteria;Firmicutes;Bacilli;Lactobacillales;Streptococcaceae;Streptococcus;Streptococcus_thermophilus
k127_4085093	2962	nt	S	LR822009.1	97.438	84	2335	0	3847	2962	LR822009.1 Streptococcus thermophilus isolate STH_CIRM_19 genome assembly; chromosome: STHERMO	76.4348	1	Bacteria;Firmicutes;Bacilli;Lactobacillales;Streptococcaceae;Streptococcus;Streptococcus_thermophilus
k127_105873	17646	nt	G	LR026983.1	90.21	11971	12824	0	1112	17646	LR026983.1 Christensenella sp. Marseille-P3954 genome assembly; chromosome: contig00001	4.86229	1	Bacteria;Firmicutes;Clostridia;Eubacteriales;Christensenellaceae;Christensenella;Christensenella
k127_3443678	4675	nt	G	LR026983.1	97.531	1	324	8.4e-152	553	4675	LR026983.1 Christensenella sp. Marseille-P3954 genome assembly; chromosome: contig00001	6.93048	1	Bacteria;Firmicutes;Clostridia;Eubacteriales;Christensenellaceae;Christensenella;Christensenella
k127_238689	2848	nt	S	LT700187.1	98.842	1	2848	0	5077	2848	LT700187.1 Christensenella sp. Marseille-P2438 genome assembly; chromosome: contig00001	100	1	Bacteria;Firmicutes;Clostridia;Eubacteriales;Christensenellaceae;Christensenella;Christensenella_massiliensis
k127_1004747	1786	db_customA	S	JACRSS010000001.1	97.424	1	1786	0	3044	1786	JACRSS010000001.1 Guopingia tenuis strain NSJ-63 L27_ctg001; whole genome shotgun sequence	100	1	Bacteria;Firmicutes;Clostridia;Eubacteriales;Christensenellaceae;Guopingia;Guopingia_tenuis
k127_1025220	1814	db_customA	S	JACRSS010000006.1	98.677	1	1814	0	3217	1814	JACRSS010000006.1 Guopingia tenuis strain NSJ-63 L27_ctg006; whole genome shotgun sequence	100	1	Bacteria;Firmicutes;Clostridia;Eubacteriales;Christensenellaceae;Guopingia;Guopingia_tenuis
k127_1067574	927	db_customA	S	JACRSS010000001.1	99.245	1	927	0	1674	927	JACRSS010000001.1 Guopingia tenuis strain NSJ-63 L27_ctg001; whole genome shotgun sequence	100	1	Bacteria;Firmicutes;Clostridia;Eubacteriales;Christensenellaceae;Guopingia;Guopingia_tenuis
k127_1067876	2872	db_customA	S	JACRSS010000001.1	98.538	1	2872	0	5072	2872	JACRSS010000001.1 Guopingia tenuis strain NSJ-63 L27_ctg001; whole genome shotgun sequence	100	1	Bacteria;Firmicutes;Clostridia;Eubacteriales;Christensenellaceae;Guopingia;Guopingia_tenuis
k127_1070238	838	db_customA	S	JACRSS010000001.1	98.807	1	838	0	1493	838	JACRSS010000001.1 Guopingia tenuis strain NSJ-63 L27_ctg001; whole genome shotgun sequence	100	1	Bacteria;Firmicutes;Clostridia;Eubacteriales;Christensenellaceae;Guopingia;Guopingia_tenuis
k127_1070785	1053	db_customA	S	JACRSS010000004.1	97.663	27	1053	0	1762	1053	JACRSS010000004.1 Guopingia tenuis strain NSJ-63 L27_ctg004; whole genome shotgun sequence	97.5309	1	Bacteria;Firmicutes;Clostridia;Eubacteriales;Christensenellaceae;Guopingia;Guopingia_tenuis
k127_1076481	1001	db_customA	S	JACRSS010000001.1	97.802	1	1001	0	1725	1001	JACRSS010000001.1 Guopingia tenuis strain NSJ-63 L27_ctg001; whole genome shotgun sequence	100	1	Bacteria;Firmicutes;Clostridia;Eubacteriales;Christensenellaceae;Guopingia;Guopingia_tenuis
k127_1083366	2397	db_customA	S	JACRSS010000001.1	98.915	1	2397	0	4281	2397	JACRSS010000001.1 Guopingia tenuis strain NSJ-63 L27_ctg001; whole genome shotgun sequence	100	1	Bacteria;Firmicutes;Clostridia;Eubacteriales;Christensenellaceae;Guopingia;Guopingia_tenuis
k127_1094726	3110	db_customA	S	JACRSS010000003.1	98.456	2	3110	0	5476	3110	JACRSS010000003.1 Guopingia tenuis strain NSJ-63 L27_ctg003; whole genome shotgun sequence	99.9678	1	Bacteria;Firmicutes;Clostridia;Eubacteriales;Christensenellaceae;Guopingia;Guopingia_tenuis
k127_1101391	2402	db_customA	S	JACRSS010000002.1	98.251	1	2402	0	4204	2402	JACRSS010000002.1 Guopingia tenuis strain NSJ-63 L27_ctg002; whole genome shotgun sequence	100	1	Bacteria;Firmicutes;Clostridia;Eubacteriales;Christensenellaceae;Guopingia;Guopingia_tenuis
k127_1103013	1181	db_customA	S	JACRSS010000001.1	100	1	1181	0	2182	1181	JACRSS010000001.1 Guopingia tenuis strain NSJ-63 L27_ctg001; whole genome shotgun sequence	100	1	Bacteria;Firmicutes;Clostridia;Eubacteriales;Christensenellaceae;Guopingia;Guopingia_tenuis
k127_1105810	1214	db_customA	S	JACRSS010000001.1	98.272	1	1214	0	2126	1214	JACRSS010000001.1 Guopingia tenuis strain NSJ-63 L27_ctg001; whole genome shotgun sequence	100	1	Bacteria;Firmicutes;Clostridia;Eubacteriales;Christensenellaceae;Guopingia;Guopingia_tenuis
k127_111197	1379	db_customA	S	JACRSS010000003.1	98.843	1	1379	0	2462	1379	JACRSS010000003.1 Guopingia tenuis strain NSJ-63 L27_ctg003; whole genome shotgun sequence	100	1	Bacteria;Firmicutes;Clostridia;Eubacteriales;Christensenellaceae;Guopingia;Guopingia_tenuis
k127_1113833	953	db_customA	S	JACRSS010000001.1	98.531	1	953	0	1683	953	JACRSS010000001.1 Guopingia tenuis strain NSJ-63 L27_ctg001; whole genome shotgun sequence	100	1	Bacteria;Firmicutes;Clostridia;Eubacteriales;Christensenellaceae;Guopingia;Guopingia_tenuis
k127_1117797	1889	db_customA	S	JACRSS010000003.1	99.471	1	1889	0	3434	1889	JACRSS010000003.1 Guopingia tenuis strain NSJ-63 L27_ctg003; whole genome shotgun sequence	100	1	Bacteria;Firmicutes;Clostridia;Eubacteriales;Christensenellaceae;Guopingia;Guopingia_tenuis
k127_1124496	2630	db_customA	S	JACRSS010000003.1	98.099	1	2630	0	4580	2630	JACRSS010000003.1 Guopingia tenuis strain NSJ-63 L27_ctg003; whole genome shotgun sequence	100	1	Bacteria;Firmicutes;Clostridia;Eubacteriales;Christensenellaceae;Guopingia;Guopingia_tenuis
k127_1184115	1693	db_customA	S	JACRSS010000001.1	98.11	1	1693	0	2950	1693	JACRSS010000001.1 Guopingia tenuis strain NSJ-63 L27_ctg001; whole genome shotgun sequence	100	1	Bacteria;Firmicutes;Clostridia;Eubacteriales;Christensenellaceae;Guopingia;Guopingia_tenuis
k127_1190739	1809	db_customA	S	JACRSS010000001.1	99.337	1	1809	0	3275	1809	JACRSS010000001.1 Guopingia tenuis strain NSJ-63 L27_ctg001; whole genome shotgun sequence	100	1	Bacteria;Firmicutes;Clostridia;Eubacteriales;Christensenellaceae;Guopingia;Guopingia_tenuis
k127_1209731	847	db_customA	S	JACRSS010000001.1	98.817	1	845	0	1506	847	JACRSS010000001.1 Guopingia tenuis strain NSJ-63 L27_ctg001; whole genome shotgun sequence	99.7639	1	Bacteria;Firmicutes;Clostridia;Eubacteriales;Christensenellaceae;Guopingia;Guopingia_tenuis
k127_1219579	1730	db_customA	S	JACRSS010000004.1	98.382	1	1730	0	3040	1730	JACRSS010000004.1 Guopingia tenuis strain NSJ-63 L27_ctg004; whole genome shotgun sequence	100	1	Bacteria;Firmicutes;Clostridia;Eubacteriales;Christensenellaceae;Guopingia;Guopingia_tenuis
k127_124988	2419	db_customA	S	JACRSS010000002.1	98.596	1	2419	0	4281	2419	JACRSS010000002.1 Guopingia tenuis strain NSJ-63 L27_ctg002; whole genome shotgun sequence	100	1	Bacteria;Firmicutes;Clostridia;Eubacteriales;Christensenellaceae;Guopingia;Guopingia_tenuis
k127_1273302	937	db_customA	S	JACRSS010000003.1	98.292	1	937	0	1642	937	JACRSS010000003.1 Guopingia tenuis strain NSJ-63 L27_ctg003; whole genome shotgun sequence	100	1	Bacteria;Firmicutes;Clostridia;Eubacteriales;Christensenellaceae;Guopingia;Guopingia_tenuis
k127_1282406	1431	db_customA	S	JACRSS010000002.1	99.93	1	1431	0	2638	1431	JACRSS010000002.1 Guopingia tenuis strain NSJ-63 L27_ctg002; whole genome shotgun sequence	100	1	Bacteria;Firmicutes;Clostridia;Eubacteriales;Christensenellaceae;Guopingia;Guopingia_tenuis
k127_1287859	1021	db_customA	S	JACRSS010000001.1	97.554	1	1021	0	1746	1021	JACRSS010000001.1 Guopingia tenuis strain NSJ-63 L27_ctg001; whole genome shotgun sequence	100	1	Bacteria;Firmicutes;Clostridia;Eubacteriales;Christensenellaceae;Guopingia;Guopingia_tenuis
k127_1303567	2176	db_customA	S	JACRSS010000003.1	99.173	1	2176	0	3919	2176	JACRSS010000003.1 Guopingia tenuis strain NSJ-63 L27_ctg003; whole genome shotgun sequence	100	1	Bacteria;Firmicutes;Clostridia;Eubacteriales;Christensenellaceae;Guopingia;Guopingia_tenuis
k127_1307245	1899	db_customA	S	JACRSS010000001.1	99.473	1	1899	0	3452	1899	JACRSS010000001.1 Guopingia tenuis strain NSJ-63 L27_ctg001; whole genome shotgun sequence	100	1	Bacteria;Firmicutes;Clostridia;Eubacteriales;Christensenellaceae;Guopingia;Guopingia_tenuis
k127_1327174	1574	db_customA	S	JACRSS010000001.1	98.282	1	1572	0	2754	1574	JACRSS010000001.1 Guopingia tenuis strain NSJ-63 L27_ctg001; whole genome shotgun sequence	99.8729	1	Bacteria;Firmicutes;Clostridia;Eubacteriales;Christensenellaceae;Guopingia;Guopingia_tenuis
k127_1339057	1247	db_customA	S	JACRSS010000006.1	97.995	1	1247	0	2165	1247	JACRSS010000006.1 Guopingia tenuis strain NSJ-63 L27_ctg006; whole genome shotgun sequence	100	1	Bacteria;Firmicutes;Clostridia;Eubacteriales;Christensenellaceae;Guopingia;Guopingia_tenuis
k127_1340213	2932	db_customA	S	JACRSS010000005.1	99.045	1	2932	0	5260	2932	JACRSS010000005.1 Guopingia tenuis strain NSJ-63 L27_ctg005; whole genome shotgun sequence	100	1	Bacteria;Firmicutes;Clostridia;Eubacteriales;Christensenellaceae;Guopingia;Guopingia_tenuis
k127_1413650	1674	db_customA	S	JACRSS010000001.1	98.148	1	1674	0	2920	1674	JACRSS010000001.1 Guopingia tenuis strain NSJ-63 L27_ctg001; whole genome shotgun sequence	100	1	Bacteria;Firmicutes;Clostridia;Eubacteriales;Christensenellaceae;Guopingia;Guopingia_tenuis
k127_1415816	789	db_customA	S	JACRSS010000002.1	99.493	1	789	0	1435	789	JACRSS010000002.1 Guopingia tenuis strain NSJ-63 L27_ctg002; whole genome shotgun sequence	100	1	Bacteria;Firmicutes;Clostridia;Eubacteriales;Christensenellaceae;Guopingia;Guopingia_tenuis
k127_1417978	1432	db_customA	S	JACRSS010000001.1	97.843	1	1432	0	2477	1432	JACRSS010000001.1 Guopingia tenuis strain NSJ-63 L27_ctg001; whole genome shotgun sequence	100	1	Bacteria;Firmicutes;Clostridia;Eubacteriales;Christensenellaceae;Guopingia;Guopingia_tenuis
k127_1422824	1141	db_customA	S	JACRSS010000001.1	98.421	1	1140	0	2004	1141	JACRSS010000001.1 Guopingia tenuis strain NSJ-63 L27_ctg001; whole genome shotgun sequence	99.9124	1	Bacteria;Firmicutes;Clostridia;Eubacteriales;Christensenellaceae;Guopingia;Guopingia_tenuis
k127_1424597	2168	db_customA	S	JACRSS010000002.1	98.659	4	2166	0	3834	2168	JACRSS010000002.1 Guopingia tenuis strain NSJ-63 L27_ctg002; whole genome shotgun sequence	99.7694	1	Bacteria;Firmicutes;Clostridia;Eubacteriales;Christensenellaceae;Guopingia;Guopingia_tenuis
k127_1425476	1678	db_customA	S	JACRSS010000006.1	99.166	1	1678	0	3022	1678	JACRSS010000006.1 Guopingia tenuis strain NSJ-63 L27_ctg006; whole genome shotgun sequence	100	1	Bacteria;Firmicutes;Clostridia;Eubacteriales;Christensenellaceae;Guopingia;Guopingia_tenuis
k127_1437321	1940	db_customA	S	JACRSS010000001.1	99.639	1	1940	0	3544	1940	JACRSS010000001.1 Guopingia tenuis strain NSJ-63 L27_ctg001; whole genome shotgun sequence	100	1	Bacteria;Firmicutes;Clostridia;Eubacteriales;Christensenellaceae;Guopingia;Guopingia_tenuis
k127_1467392	495	db_customA	S	JACRSS010000004.1	98.586	1	495	0	876	495	JACRSS010000004.1 Guopingia tenuis strain NSJ-63 L27_ctg004; whole genome shotgun sequence	100	1	Bacteria;Firmicutes;Clostridia;Eubacteriales;Christensenellaceae;Guopingia;Guopingia_tenuis
k127_1493512	2299	db_customA	S	JACRSS010000003.1	98.347	1	2299	0	4034	2299	JACRSS010000003.1 Guopingia tenuis strain NSJ-63 L27_ctg003; whole genome shotgun sequence	100	1	Bacteria;Firmicutes;Clostridia;Eubacteriales;Christensenellaceae;Guopingia;Guopingia_tenuis
k127_150695	2961	db_customA	S	JACRSS010000001.1	98.548	1	2961	0	5230	2961	JACRSS010000001.1 Guopingia tenuis strain NSJ-63 L27_ctg001; whole genome shotgun sequence	100	1	Bacteria;Firmicutes;Clostridia;Eubacteriales;Christensenellaceae;Guopingia;Guopingia_tenuis
k127_1540671	1477	db_customA	S	JACRSS010000002.1	98.104	1	1477	0	2573	1477	JACRSS010000002.1 Guopingia tenuis strain NSJ-63 L27_ctg002; whole genome shotgun sequence	100	1	Bacteria;Firmicutes;Clostridia;Eubacteriales;Christensenellaceae;Guopingia;Guopingia_tenuis
k127_1563812	1770	db_customA	S	JACRSS010000003.1	98.927	1	1770	0	3164	1770	JACRSS010000003.1 Guopingia tenuis strain NSJ-63 L27_ctg003; whole genome shotgun sequence	100	1	Bacteria;Firmicutes;Clostridia;Eubacteriales;Christensenellaceae;Guopingia;Guopingia_tenuis
k127_157559	1293	db_customA	S	JACRSS010000001.1	97.059	2	1293	0	2176	1293	JACRSS010000001.1 Guopingia tenuis strain NSJ-63 L27_ctg001; whole genome shotgun sequence	99.9227	1	Bacteria;Firmicutes;Clostridia;Eubacteriales;Christensenellaceae;Guopingia;Guopingia_tenuis
k127_1597544	1069	db_customA	S	JACRSS010000003.1	99.532	1	1069	0	1947	1069	JACRSS010000003.1 Guopingia tenuis strain NSJ-63 L27_ctg003; whole genome shotgun sequence	100	1	Bacteria;Firmicutes;Clostridia;Eubacteriales;Christensenellaceae;Guopingia;Guopingia_tenuis
k127_1606609	2569	db_customA	S	JACRSS010000002.1	97.669	129	2569	0	4191	2569	JACRSS010000002.1 Guopingia tenuis strain NSJ-63 L27_ctg002; whole genome shotgun sequence	95.1732	1	Bacteria;Firmicutes;Clostridia;Eubacteriales;Christensenellaceae;Guopingia;Guopingia_tenuis
k127_1633900	1507	db_customA	S	JACRSS010000001.1	97.542	1	1505	0	2575	1507	JACRSS010000001.1 Guopingia tenuis strain NSJ-63 L27_ctg001; whole genome shotgun sequence	99.8673	1	Bacteria;Firmicutes;Clostridia;Eubacteriales;Christensenellaceae;Guopingia;Guopingia_tenuis
k127_1642667	959	db_customA	S	JACRSS010000006.1	98.853	1	959	0	1711	959	JACRSS010000006.1 Guopingia tenuis strain NSJ-63 L27_ctg006; whole genome shotgun sequence	100	1	Bacteria;Firmicutes;Clostridia;Eubacteriales;Christensenellaceae;Guopingia;Guopingia_tenuis
k127_1647203	802	db_customA	S	JACRSS010000001.1	99.501	1	802	0	1459	802	JACRSS010000001.1 Guopingia tenuis strain NSJ-63 L27_ctg001; whole genome shotgun sequence	100	1	Bacteria;Firmicutes;Clostridia;Eubacteriales;Christensenellaceae;Guopingia;Guopingia_tenuis
k127_166794	724	db_customA	S	JACRSS010000005.1	98.329	7	724	0	1260	724	JACRSS010000005.1 Guopingia tenuis strain NSJ-63 L27_ctg005; whole genome shotgun sequence	99.1713	1	Bacteria;Firmicutes;Clostridia;Eubacteriales;Christensenellaceae;Guopingia;Guopingia_tenuis
k127_1673082	1632	db_customA	S	JACRSS010000001.1	99.262	1	1626	0	2937	1632	JACRSS010000001.1 Guopingia tenuis strain NSJ-63 L27_ctg001; whole genome shotgun sequence	99.6324	1	Bacteria;Firmicutes;Clostridia;Eubacteriales;Christensenellaceae;Guopingia;Guopingia_tenuis
k127_1694197	1267	db_customA	S	JACRSS010000002.1	99.842	1	1267	0	2329	1267	JACRSS010000002.1 Guopingia tenuis strain NSJ-63 L27_ctg002; whole genome shotgun sequence	100	1	Bacteria;Firmicutes;Clostridia;Eubacteriales;Christensenellaceae;Guopingia;Guopingia_tenuis
k127_1728208	973	db_customA	S	JACRSS010000001.1	99.589	1	973	0	1775	973	JACRSS010000001.1 Guopingia tenuis strain NSJ-63 L27_ctg001; whole genome shotgun sequence	100	1	Bacteria;Firmicutes;Clostridia;Eubacteriales;Christensenellaceae;Guopingia;Guopingia_tenuis
k127_1731697	1208	db_customA	S	JACRSS010000001.1	98.841	1	1208	0	2154	1208	JACRSS010000001.1 Guopingia tenuis strain NSJ-63 L27_ctg001; whole genome shotgun sequence	100	1	Bacteria;Firmicutes;Clostridia;Eubacteriales;Christensenellaceae;Guopingia;Guopingia_tenuis
k127_1752710	1937	db_customA	S	JACRSS010000003.1	98.916	1	1937	0	3454	1937	JACRSS010000003.1 Guopingia tenuis strain NSJ-63 L27_ctg003; whole genome shotgun sequence	100	1	Bacteria;Firmicutes;Clostridia;Eubacteriales;Christensenellaceae;Guopingia;Guopingia_tenuis
k127_1756135	1248	db_customA	S	JACRSS010000001.1	99.359	1	1248	0	2257	1248	JACRSS010000001.1 Guopingia tenuis strain NSJ-63 L27_ctg001; whole genome shotgun sequence	100	1	Bacteria;Firmicutes;Clostridia;Eubacteriales;Christensenellaceae;Guopingia;Guopingia_tenuis
k127_1765328	1823	db_customA	S	JACRSS010000001.1	99.232	1	1823	0	3290	1823	JACRSS010000001.1 Guopingia tenuis strain NSJ-63 L27_ctg001; whole genome shotgun sequence	100	1	Bacteria;Firmicutes;Clostridia;Eubacteriales;Christensenellaceae;Guopingia;Guopingia_tenuis
k127_1785525	2493	db_customA	S	JACRSS010000001.1	99.398	1	2493	0	4521	2493	JACRSS010000001.1 Guopingia tenuis strain NSJ-63 L27_ctg001; whole genome shotgun sequence	100	1	Bacteria;Firmicutes;Clostridia;Eubacteriales;Christensenellaceae;Guopingia;Guopingia_tenuis
k127_1789322	1536	db_customA	S	JACRSS010000005.1	97.135	1	1536	0	2593	1536	JACRSS010000005.1 Guopingia tenuis strain NSJ-63 L27_ctg005; whole genome shotgun sequence	100	1	Bacteria;Firmicutes;Clostridia;Eubacteriales;Christensenellaceae;Guopingia;Guopingia_tenuis
k127_1790182	1527	db_customA	S	JACRSS010000001.1	97.448	1	1525	0	2601	1527	JACRSS010000001.1 Guopingia tenuis strain NSJ-63 L27_ctg001; whole genome shotgun sequence	100	1	Bacteria;Firmicutes;Clostridia;Eubacteriales;Christensenellaceae;Guopingia;Guopingia_tenuis
k127_1795180	2766	db_customA	S	JACRSS010000001.1	99.439	1697	2766	0	1943	2766	JACRSS010000001.1 Guopingia tenuis strain NSJ-63 L27_ctg001; whole genome shotgun sequence	38.684	2	Bacteria;Firmicutes;Clostridia;Eubacteriales;Christensenellaceae;Guopingia;Guopingia_tenuis
k127_1842913	425	db_customA	S	JACRSS010000002.1	98.588	1	425	0	752	425	JACRSS010000002.1 Guopingia tenuis strain NSJ-63 L27_ctg002; whole genome shotgun sequence	100	1	Bacteria;Firmicutes;Clostridia;Eubacteriales;Christensenellaceae;Guopingia;Guopingia_tenuis
k127_1854524	1442	db_customA	S	JACRSS010000002.1	97.85	1	1442	0	2490	1442	JACRSS010000002.1 Guopingia tenuis strain NSJ-63 L27_ctg002; whole genome shotgun sequence	100	1	Bacteria;Firmicutes;Clostridia;Eubacteriales;Christensenellaceae;Guopingia;Guopingia_tenuis
k127_1854811	1965	db_customA	S	JACRSS010000001.1	98.066	1	1965	0	3419	1965	JACRSS010000001.1 Guopingia tenuis strain NSJ-63 L27_ctg001; whole genome shotgun sequence	100	1	Bacteria;Firmicutes;Clostridia;Eubacteriales;Christensenellaceae;Guopingia;Guopingia_tenuis
k127_1887083	2148	db_customA	S	JACRSS010000002.1	99.65	1	1142	0	2087	2148	JACRSS010000002.1 Guopingia tenuis strain NSJ-63 L27_ctg002; whole genome shotgun sequence	53.1657	1	Bacteria;Firmicutes;Clostridia;Eubacteriales;Christensenellaceae;Guopingia;Guopingia_tenuis
k127_1896228	2084	db_customA	S	JACRSS010000001.1	97.358	3	2084	0	3541	2084	JACRSS010000001.1 Guopingia tenuis strain NSJ-63 L27_ctg001; whole genome shotgun sequence	99.904	1	Bacteria;Firmicutes;Clostridia;Eubacteriales;Christensenellaceae;Guopingia;Guopingia_tenuis
k127_1902930	2667	db_customA	S	JACRSS010000004.1	98.993	1	2667	0	4787	2667	JACRSS010000004.1 Guopingia tenuis strain NSJ-63 L27_ctg004; whole genome shotgun sequence	100	1	Bacteria;Firmicutes;Clostridia;Eubacteriales;Christensenellaceae;Guopingia;Guopingia_tenuis
k127_1908942	571	db_customA	S	JACRSS010000002.1	97.898	1	571	0	989	571	JACRSS010000002.1 Guopingia tenuis strain NSJ-63 L27_ctg002; whole genome shotgun sequence	100	1	Bacteria;Firmicutes;Clostridia;Eubacteriales;Christensenellaceae;Guopingia;Guopingia_tenuis
k127_1946073	1389	db_customA	S	JACRSS010000004.1	98.056	1	1389	0	2416	1389	JACRSS010000004.1 Guopingia tenuis strain NSJ-63 L27_ctg004; whole genome shotgun sequence	100	1	Bacteria;Firmicutes;Clostridia;Eubacteriales;Christensenellaceae;Guopingia;Guopingia_tenuis
k127_1954908	2200	db_customA	S	JACRSS010000001.1	98.001	1	2200	0	3819	2200	JACRSS010000001.1 Guopingia tenuis strain NSJ-63 L27_ctg001; whole genome shotgun sequence	100	1	Bacteria;Firmicutes;Clostridia;Eubacteriales;Christensenellaceae;Guopingia;Guopingia_tenuis
k127_2028574	1305	db_customA	S	JACRSS010000001.1	98.774	1	1305	0	2322	1305	JACRSS010000001.1 Guopingia tenuis strain NSJ-63 L27_ctg001; whole genome shotgun sequence	100	1	Bacteria;Firmicutes;Clostridia;Eubacteriales;Christensenellaceae;Guopingia;Guopingia_tenuis
k127_2038149	1451	db_customA	S	JACRSS010000001.1	98.897	1	1451	0	2591	1451	JACRSS010000001.1 Guopingia tenuis strain NSJ-63 L27_ctg001; whole genome shotgun sequence	100	1	Bacteria;Firmicutes;Clostridia;Eubacteriales;Christensenellaceae;Guopingia;Guopingia_tenuis
k127_2044421	3055	db_customA	S	JACRSS010000001.1	98.822	1	3055	0	5443	3055	JACRSS010000001.1 Guopingia tenuis strain NSJ-63 L27_ctg001; whole genome shotgun sequence	100	1	Bacteria;Firmicutes;Clostridia;Eubacteriales;Christensenellaceae;Guopingia;Guopingia_tenuis
k127_2049660	2233	db_customA	S	JACRSS010000004.1	98.566	1	2231	0	3943	2233	JACRSS010000004.1 Guopingia tenuis strain NSJ-63 L27_ctg004; whole genome shotgun sequence	99.9104	1	Bacteria;Firmicutes;Clostridia;Eubacteriales;Christensenellaceae;Guopingia;Guopingia_tenuis
k127_2059398	1101	db_customA	S	JACRSS010000001.1	98.183	1	1101	0	1923	1101	JACRSS010000001.1 Guopingia tenuis strain NSJ-63 L27_ctg001; whole genome shotgun sequence	100	1	Bacteria;Firmicutes;Clostridia;Eubacteriales;Christensenellaceae;Guopingia;Guopingia_tenuis
k127_2082296	2413	db_customA	S	JACRSS010000001.1	98.839	1	2411	0	4298	2413	JACRSS010000001.1 Guopingia tenuis strain NSJ-63 L27_ctg001; whole genome shotgun sequence	99.9171	1	Bacteria;Firmicutes;Clostridia;Eubacteriales;Christensenellaceae;Guopingia;Guopingia_tenuis
k127_2104171	2030	db_customA	S	JACRSS010000001.1	98.522	1	2030	0	3583	2030	JACRSS010000001.1 Guopingia tenuis strain NSJ-63 L27_ctg001; whole genome shotgun sequence	100	1	Bacteria;Firmicutes;Clostridia;Eubacteriales;Christensenellaceae;Guopingia;Guopingia_tenuis
k127_2122066	1495	db_customA	S	JACRSS010000005.1	98.792	6	1495	0	2652	1495	JACRSS010000005.1 Guopingia tenuis strain NSJ-63 L27_ctg005; whole genome shotgun sequence	99.6656	1	Bacteria;Firmicutes;Clostridia;Eubacteriales;Christensenellaceae;Guopingia;Guopingia_tenuis
k127_2134564	551	db_customA	S	JACRSS010000003.1	98.73	1	551	0	979	551	JACRSS010000003.1 Guopingia tenuis strain NSJ-63 L27_ctg003; whole genome shotgun sequence	100	1	Bacteria;Firmicutes;Clostridia;Eubacteriales;Christensenellaceae;Guopingia;Guopingia_tenuis
k127_2149158	1423	db_customA	S	JACRSS010000001.1	97.039	73	1423	0	2274	1423	JACRSS010000001.1 Guopingia tenuis strain NSJ-63 L27_ctg001; whole genome shotgun sequence	94.9403	1	Bacteria;Firmicutes;Clostridia;Eubacteriales;Christensenellaceae;Guopingia;Guopingia_tenuis
k127_2150546	4931	db_customA	S	JACRSS010000001.1	97.708	1	4931	0	8479	4931	JACRSS010000001.1 Guopingia tenuis strain NSJ-63 L27_ctg001; whole genome shotgun sequence	100	1	Bacteria;Firmicutes;Clostridia;Eubacteriales;Christensenellaceae;Guopingia;Guopingia_tenuis
k127_2153245	1659	db_customA	S	JACRSS010000001.1	98.674	1	1659	0	2942	1659	JACRSS010000001.1 Guopingia tenuis strain NSJ-63 L27_ctg001; whole genome shotgun sequence	100	1	Bacteria;Firmicutes;Clostridia;Eubacteriales;Christensenellaceae;Guopingia;Guopingia_tenuis
k127_2192193	860	db_customA	S	JACRSS010000001.1	98.953	1	860	0	1539	860	JACRSS010000001.1 Guopingia tenuis strain NSJ-63 L27_ctg001; whole genome shotgun sequence	100	1	Bacteria;Firmicutes;Clostridia;Eubacteriales;Christensenellaceae;Guopingia;Guopingia_tenuis
k127_2206593	1473	db_customA	S	JACRSS010000001.1	97.963	1	1473	0	2555	1473	JACRSS010000001.1 Guopingia tenuis strain NSJ-63 L27_ctg001; whole genome shotgun sequence	100	1	Bacteria;Firmicutes;Clostridia;Eubacteriales;Christensenellaceae;Guopingia;Guopingia_tenuis
k127_2227184	1526	db_customA	S	JACRSS010000001.1	98.886	1	1526	0	2723	1526	JACRSS010000001.1 Guopingia tenuis strain NSJ-63 L27_ctg001; whole genome shotgun sequence	100	1	Bacteria;Firmicutes;Clostridia;Eubacteriales;Christensenellaceae;Guopingia;Guopingia_tenuis
k127_2232092	1873	db_customA	S	JACRSS010000001.1	98.452	1	1873	0	3299	1873	JACRSS010000001.1 Guopingia tenuis strain NSJ-63 L27_ctg001; whole genome shotgun sequence	100	1	Bacteria;Firmicutes;Clostridia;Eubacteriales;Christensenellaceae;Guopingia;Guopingia_tenuis
k127_2270552	1162	db_customA	S	JACRSS010000002.1	99.398	1	1162	0	2108	1162	JACRSS010000002.1 Guopingia tenuis strain NSJ-63 L27_ctg002; whole genome shotgun sequence	100	1	Bacteria;Firmicutes;Clostridia;Eubacteriales;Christensenellaceae;Guopingia;Guopingia_tenuis
k127_2285135	637	db_customA	S	JACRSS010000006.1	98.273	1	637	0	1116	637	JACRSS010000006.1 Guopingia tenuis strain NSJ-63 L27_ctg006; whole genome shotgun sequence	100	1	Bacteria;Firmicutes;Clostridia;Eubacteriales;Christensenellaceae;Guopingia;Guopingia_tenuis
k127_2310979	1958	db_customA	S	JACRSS010000003.1	97.038	1	1958	0	3295	1958	JACRSS010000003.1 Guopingia tenuis strain NSJ-63 L27_ctg003; whole genome shotgun sequence	100	1	Bacteria;Firmicutes;Clostridia;Eubacteriales;Christensenellaceae;Guopingia;Guopingia_tenuis
k127_2323887	2922	db_customA	S	JACRSS010000003.1	98.22	1	2922	0	5108	2922	JACRSS010000003.1 Guopingia tenuis strain NSJ-63 L27_ctg003; whole genome shotgun sequence	100	1	Bacteria;Firmicutes;Clostridia;Eubacteriales;Christensenellaceae;Guopingia;Guopingia_tenuis
k127_2331503	3033	db_customA	S	JACRSS010000005.1	98.152	114	3033	0	5094	3033	JACRSS010000005.1 Guopingia tenuis strain NSJ-63 L27_ctg005; whole genome shotgun sequence	96.3403	1	Bacteria;Firmicutes;Clostridia;Eubacteriales;Christensenellaceae;Guopingia;Guopingia_tenuis
k127_2343123	1125	db_customA	S	JACRSS010000006.1	98.037	3	1123	0	1949	1125	JACRSS010000006.1 Guopingia tenuis strain NSJ-63 L27_ctg006; whole genome shotgun sequence	99.6444	1	Bacteria;Firmicutes;Clostridia;Eubacteriales;Christensenellaceae;Guopingia;Guopingia_tenuis
k127_2375453	1055	db_customA	S	JACRSS010000001.1	97.913	2	1055	0	1825	1055	JACRSS010000001.1 Guopingia tenuis strain NSJ-63 L27_ctg001; whole genome shotgun sequence	99.9052	1	Bacteria;Firmicutes;Clostridia;Eubacteriales;Christensenellaceae;Guopingia;Guopingia_tenuis
k127_2386226	3145	db_customA	S	JACRSS010000002.1	97.023	780	3145	0	3984	3145	JACRSS010000002.1 Guopingia tenuis strain NSJ-63 L27_ctg002; whole genome shotgun sequence	75.8347	1	Bacteria;Firmicutes;Clostridia;Eubacteriales;Christensenellaceae;Guopingia;Guopingia_tenuis
k127_2419361	2171	db_customA	S	JACRSS010000003.1	98.434	1	2171	0	3821	2171	JACRSS010000003.1 Guopingia tenuis strain NSJ-63 L27_ctg003; whole genome shotgun sequence	100	1	Bacteria;Firmicutes;Clostridia;Eubacteriales;Christensenellaceae;Guopingia;Guopingia_tenuis
k127_2437476	1388	db_customA	S	JACRSS010000003.1	97.839	1	1388	0	2398	1388	JACRSS010000003.1 Guopingia tenuis strain NSJ-63 L27_ctg003; whole genome shotgun sequence	100	1	Bacteria;Firmicutes;Clostridia;Eubacteriales;Christensenellaceae;Guopingia;Guopingia_tenuis
k127_2456077	1022	db_customA	S	JACRSS010000001.1	99.119	1	1022	0	1838	1022	JACRSS010000001.1 Guopingia tenuis strain NSJ-63 L27_ctg001; whole genome shotgun sequence	100	1	Bacteria;Firmicutes;Clostridia;Eubacteriales;Christensenellaceae;Guopingia;Guopingia_tenuis
k127_2490637	1637	db_customA	S	JACRSS010000001.1	99.145	1	1637	0	2946	1637	JACRSS010000001.1 Guopingia tenuis strain NSJ-63 L27_ctg001; whole genome shotgun sequence	100	1	Bacteria;Firmicutes;Clostridia;Eubacteriales;Christensenellaceae;Guopingia;Guopingia_tenuis
k127_250724	2637	db_customA	S	JACRSS010000003.1	98.696	1	2607	0	4625	2637	JACRSS010000003.1 Guopingia tenuis strain NSJ-63 L27_ctg003; whole genome shotgun sequence	98.8623	1	Bacteria;Firmicutes;Clostridia;Eubacteriales;Christensenellaceae;Guopingia;Guopingia_tenuis
k127_2533840	785	db_customA	S	JACRSS010000003.1	98.344	1	785	0	1378	785	JACRSS010000003.1 Guopingia tenuis strain NSJ-63 L27_ctg003; whole genome shotgun sequence	100	1	Bacteria;Firmicutes;Clostridia;Eubacteriales;Christensenellaceae;Guopingia;Guopingia_tenuis
k127_2540115	1537	db_customA	S	JACRSS010000003.1	99.284	1	1537	0	2778	1537	JACRSS010000003.1 Guopingia tenuis strain NSJ-63 L27_ctg003; whole genome shotgun sequence	100	1	Bacteria;Firmicutes;Clostridia;Eubacteriales;Christensenellaceae;Guopingia;Guopingia_tenuis
k127_2562144	2643	db_customA	S	JACRSS010000001.1	97.345	7	2643	0	4479	2643	JACRSS010000001.1 Guopingia tenuis strain NSJ-63 L27_ctg001; whole genome shotgun sequence	99.773	1	Bacteria;Firmicutes;Clostridia;Eubacteriales;Christensenellaceae;Guopingia;Guopingia_tenuis
k127_2573650	2515	db_customA	S	JACRSS010000001.1	98.887	1	2515	0	4488	2515	JACRSS010000001.1 Guopingia tenuis strain NSJ-63 L27_ctg001; whole genome shotgun sequence	100	1	Bacteria;Firmicutes;Clostridia;Eubacteriales;Christensenellaceae;Guopingia;Guopingia_tenuis
k127_2573997	3821	db_customA	S	JACRSS010000003.1	97.393	562	3821	0	5550	3821	JACRSS010000003.1 Guopingia tenuis strain NSJ-63 L27_ctg003; whole genome shotgun sequence	85.3442	1	Bacteria;Firmicutes;Clostridia;Eubacteriales;Christensenellaceae;Guopingia;Guopingia_tenuis
k127_2583952	2219	db_customA	S	JACRSS010000001.1	98.33	2	2217	0	3888	2219	JACRSS010000001.1 Guopingia tenuis strain NSJ-63 L27_ctg001; whole genome shotgun sequence	99.8648	1	Bacteria;Firmicutes;Clostridia;Eubacteriales;Christensenellaceae;Guopingia;Guopingia_tenuis
k127_2602878	1283	db_customA	S	JACRSS010000001.1	98.441	1	1283	0	2259	1283	JACRSS010000001.1 Guopingia tenuis strain NSJ-63 L27_ctg001; whole genome shotgun sequence	100	1	Bacteria;Firmicutes;Clostridia;Eubacteriales;Christensenellaceae;Guopingia;Guopingia_tenuis
k127_2609248	1978	db_customA	S	JACRSS010000001.1	98.382	1	1978	0	3476	1978	JACRSS010000001.1 Guopingia tenuis strain NSJ-63 L27_ctg001; whole genome shotgun sequence	100	1	Bacteria;Firmicutes;Clostridia;Eubacteriales;Christensenellaceae;Guopingia;Guopingia_tenuis
k127_264607	1076	db_customA	S	JACRSS010000001.1	97.946	3	1073	0	1857	1076	JACRSS010000001.1 Guopingia tenuis strain NSJ-63 L27_ctg001; whole genome shotgun sequence	99.5353	1	Bacteria;Firmicutes;Clostridia;Eubacteriales;Christensenellaceae;Guopingia;Guopingia_tenuis
k127_2695982	1259	db_customA	S	JACRSS010000001.1	98.967	2	1259	0	2252	1259	JACRSS010000001.1 Guopingia tenuis strain NSJ-63 L27_ctg001; whole genome shotgun sequence	99.9206	1	Bacteria;Firmicutes;Clostridia;Eubacteriales;Christensenellaceae;Guopingia;Guopingia_tenuis
k127_2703750	1294	db_customA	S	JACRSS010000001.1	97.218	1	1294	0	2191	1294	JACRSS010000001.1 Guopingia tenuis strain NSJ-63 L27_ctg001; whole genome shotgun sequence	100	1	Bacteria;Firmicutes;Clostridia;Eubacteriales;Christensenellaceae;Guopingia;Guopingia_tenuis
k127_2710104	2068	db_customA	S	JACRSS010000005.1	97.487	1	2068	0	3531	2068	JACRSS010000005.1 Guopingia tenuis strain NSJ-63 L27_ctg005; whole genome shotgun sequence	100	1	Bacteria;Firmicutes;Clostridia;Eubacteriales;Christensenellaceae;Guopingia;Guopingia_tenuis
k127_2718614	1217	db_customA	S	JACRSS010000001.1	98.357	1	1217	0	2137	1217	JACRSS010000001.1 Guopingia tenuis strain NSJ-63 L27_ctg001; whole genome shotgun sequence	100	1	Bacteria;Firmicutes;Clostridia;Eubacteriales;Christensenellaceae;Guopingia;Guopingia_tenuis
k127_2737920	852	db_customA	S	JACRSS010000003.1	97.515	1	845	0	1445	852	JACRSS010000003.1 Guopingia tenuis strain NSJ-63 L27_ctg003; whole genome shotgun sequence	99.1784	1	Bacteria;Firmicutes;Clostridia;Eubacteriales;Christensenellaceae;Guopingia;Guopingia_tenuis
k127_2748632	1070	db_customA	S	JACRSS010000002.1	97.944	1	1070	0	1855	1070	JACRSS010000002.1 Guopingia tenuis strain NSJ-63 L27_ctg002; whole genome shotgun sequence	100	1	Bacteria;Firmicutes;Clostridia;Eubacteriales;Christensenellaceae;Guopingia;Guopingia_tenuis
k127_2749236	1140	db_customA	S	JACRSS010000003.1	98.86	1	1140	0	2034	1140	JACRSS010000003.1 Guopingia tenuis strain NSJ-63 L27_ctg003; whole genome shotgun sequence	100	1	Bacteria;Firmicutes;Clostridia;Eubacteriales;Christensenellaceae;Guopingia;Guopingia_tenuis
k127_2759363	1534	db_customA	S	JACRSS010000001.1	98.896	1	1534	0	2745	1534	JACRSS010000001.1 Guopingia tenuis strain NSJ-63 L27_ctg001; whole genome shotgun sequence	100	1	Bacteria;Firmicutes;Clostridia;Eubacteriales;Christensenellaceae;Guopingia;Guopingia_tenuis
k127_2767828	2967	db_customA	S	JACRSS010000006.1	98.315	1	2967	0	5203	2967	JACRSS010000006.1 Guopingia tenuis strain NSJ-63 L27_ctg006; whole genome shotgun sequence	100	1	Bacteria;Firmicutes;Clostridia;Eubacteriales;Christensenellaceae;Guopingia;Guopingia_tenuis
k127_27696	3215	db_customA	S	JACRSS010000001.1	98.6	1	3215	0	5688	3215	JACRSS010000001.1 Guopingia tenuis strain NSJ-63 L27_ctg001; whole genome shotgun sequence	100	1	Bacteria;Firmicutes;Clostridia;Eubacteriales;Christensenellaceae;Guopingia;Guopingia_tenuis
k127_2796684	1747	db_customA	S	JACRSS010000002.1	99.37	1	1747	0	3166	1747	JACRSS010000002.1 Guopingia tenuis strain NSJ-63 L27_ctg002; whole genome shotgun sequence	100	1	Bacteria;Firmicutes;Clostridia;Eubacteriales;Christensenellaceae;Guopingia;Guopingia_tenuis
k127_2816011	936	db_customA	S	JACRSS010000001.1	98.504	1	936	0	1652	936	JACRSS010000001.1 Guopingia tenuis strain NSJ-63 L27_ctg001; whole genome shotgun sequence	100	1	Bacteria;Firmicutes;Clostridia;Eubacteriales;Christensenellaceae;Guopingia;Guopingia_tenuis
k127_2866592	900	db_customA	S	JACRSS010000001.1	98	1	900	0	1563	900	JACRSS010000001.1 Guopingia tenuis strain NSJ-63 L27_ctg001; whole genome shotgun sequence	100	1	Bacteria;Firmicutes;Clostridia;Eubacteriales;Christensenellaceae;Guopingia;Guopingia_tenuis
k127_2876868	2177	db_customA	S	JACRSS010000001.1	98.988	1	2174	0	3893	2177	JACRSS010000001.1 Guopingia tenuis strain NSJ-63 L27_ctg001; whole genome shotgun sequence	99.8622	1	Bacteria;Firmicutes;Clostridia;Eubacteriales;Christensenellaceae;Guopingia;Guopingia_tenuis
k127_2886135	2803	db_customA	S	JACRSS010000003.1	98.751	1	2803	0	4983	2803	JACRSS010000003.1 Guopingia tenuis strain NSJ-63 L27_ctg003; whole genome shotgun sequence	100	1	Bacteria;Firmicutes;Clostridia;Eubacteriales;Christensenellaceae;Guopingia;Guopingia_tenuis
k127_2893592	3319	db_customA	S	JACRSS010000002.1	98.494	1	3319	0	5851	3319	JACRSS010000002.1 Guopingia tenuis strain NSJ-63 L27_ctg002; whole genome shotgun sequence	100	1	Bacteria;Firmicutes;Clostridia;Eubacteriales;Christensenellaceae;Guopingia;Guopingia_tenuis
k127_2909137	1034	db_customA	S	JACRSS010000001.1	97.868	3	1034	0	1784	1034	JACRSS010000001.1 Guopingia tenuis strain NSJ-63 L27_ctg001; whole genome shotgun sequence	99.8066	1	Bacteria;Firmicutes;Clostridia;Eubacteriales;Christensenellaceae;Guopingia;Guopingia_tenuis
k127_2931675	942	db_customA	S	JACRSS010000001.1	99.575	1	942	0	1718	942	JACRSS010000001.1 Guopingia tenuis strain NSJ-63 L27_ctg001; whole genome shotgun sequence	100	1	Bacteria;Firmicutes;Clostridia;Eubacteriales;Christensenellaceae;Guopingia;Guopingia_tenuis
k127_2933007	1592	db_customA	S	JACRSS010000001.1	99.623	1	1592	0	2907	1592	JACRSS010000001.1 Guopingia tenuis strain NSJ-63 L27_ctg001; whole genome shotgun sequence	100	1	Bacteria;Firmicutes;Clostridia;Eubacteriales;Christensenellaceae;Guopingia;Guopingia_tenuis
k127_2945827	1360	db_customA	S	JACRSS010000003.1	97.426	1	1360	0	2316	1360	JACRSS010000003.1 Guopingia tenuis strain NSJ-63 L27_ctg003; whole genome shotgun sequence	100	1	Bacteria;Firmicutes;Clostridia;Eubacteriales;Christensenellaceae;Guopingia;Guopingia_tenuis
k127_2952724	1762	db_customA	S	JACRSS010000001.1	99.83	1	1762	0	3238	1762	JACRSS010000001.1 Guopingia tenuis strain NSJ-63 L27_ctg001; whole genome shotgun sequence	100	1	Bacteria;Firmicutes;Clostridia;Eubacteriales;Christensenellaceae;Guopingia;Guopingia_tenuis
k127_2960983	987	db_customA	S	JACRSS010000004.1	99.696	1	987	0	1807	987	JACRSS010000004.1 Guopingia tenuis strain NSJ-63 L27_ctg004; whole genome shotgun sequence	100	1	Bacteria;Firmicutes;Clostridia;Eubacteriales;Christensenellaceae;Guopingia;Guopingia_tenuis
k127_2962559	632	db_customA	S	JACRSS010000001.1	99.209	1	632	0	1140	632	JACRSS010000001.1 Guopingia tenuis strain NSJ-63 L27_ctg001; whole genome shotgun sequence	100	1	Bacteria;Firmicutes;Clostridia;Eubacteriales;Christensenellaceae;Guopingia;Guopingia_tenuis
k127_2967781	871	db_customA	S	JACRSS010000002.1	98.967	1	871	0	1557	871	JACRSS010000002.1 Guopingia tenuis strain NSJ-63 L27_ctg002; whole genome shotgun sequence	100	1	Bacteria;Firmicutes;Clostridia;Eubacteriales;Christensenellaceae;Guopingia;Guopingia_tenuis
k127_2972112	650	db_customA	S	JACRSS010000001.1	99.538	1	650	0	1184	650	JACRSS010000001.1 Guopingia tenuis strain NSJ-63 L27_ctg001; whole genome shotgun sequence	100	1	Bacteria;Firmicutes;Clostridia;Eubacteriales;Christensenellaceae;Guopingia;Guopingia_tenuis
k127_2988872	4331	db_customA	S	JACRSS010000001.1	99.169	1	4331	0	7799	4331	JACRSS010000001.1 Guopingia tenuis strain NSJ-63 L27_ctg001; whole genome shotgun sequence	100	1	Bacteria;Firmicutes;Clostridia;Eubacteriales;Christensenellaceae;Guopingia;Guopingia_tenuis
k127_2995706	1975	db_customA	S	JACRSS010000005.1	99.291	1	1975	0	3570	1975	JACRSS010000005.1 Guopingia tenuis strain NSJ-63 L27_ctg005; whole genome shotgun sequence	100	1	Bacteria;Firmicutes;Clostridia;Eubacteriales;Christensenellaceae;Guopingia;Guopingia_tenuis
k127_299591	1545	db_customA	S	JACRSS010000002.1	99.288	1	1545	0	2793	1545	JACRSS010000002.1 Guopingia tenuis strain NSJ-63 L27_ctg002; whole genome shotgun sequence	100	1	Bacteria;Firmicutes;Clostridia;Eubacteriales;Christensenellaceae;Guopingia;Guopingia_tenuis
k127_3019697	1767	db_customA	S	JACRSS010000004.1	98.585	1	1767	0	3125	1767	JACRSS010000004.1 Guopingia tenuis strain NSJ-63 L27_ctg004; whole genome shotgun sequence	100	1	Bacteria;Firmicutes;Clostridia;Eubacteriales;Christensenellaceae;Guopingia;Guopingia_tenuis
k127_3036755	969	db_customA	S	JACRSS010000001.1	97.523	1	969	0	1657	969	JACRSS010000001.1 Guopingia tenuis strain NSJ-63 L27_ctg001; whole genome shotgun sequence	100	1	Bacteria;Firmicutes;Clostridia;Eubacteriales;Christensenellaceae;Guopingia;Guopingia_tenuis
k127_3076429	782	db_customA	S	JACRSS010000001.1	99.361	1	782	0	1417	782	JACRSS010000001.1 Guopingia tenuis strain NSJ-63 L27_ctg001; whole genome shotgun sequence	100	1	Bacteria;Firmicutes;Clostridia;Eubacteriales;Christensenellaceae;Guopingia;Guopingia_tenuis
k127_3094999	1716	db_customA	S	JACRSS010000003.1	99.359	1	1716	0	3109	1716	JACRSS010000003.1 Guopingia tenuis strain NSJ-63 L27_ctg003; whole genome shotgun sequence	100	1	Bacteria;Firmicutes;Clostridia;Eubacteriales;Christensenellaceae;Guopingia;Guopingia_tenuis
k127_3102371	1147	db_customA	S	JACRSS010000004.1	99.041	1	1147	0	2058	1147	JACRSS010000004.1 Guopingia tenuis strain NSJ-63 L27_ctg004; whole genome shotgun sequence	100	1	Bacteria;Firmicutes;Clostridia;Eubacteriales;Christensenellaceae;Guopingia;Guopingia_tenuis
k127_3150717	2274	db_customA	S	JACRSS010000003.1	97.757	1	2273	0	3916	2274	JACRSS010000003.1 Guopingia tenuis strain NSJ-63 L27_ctg003; whole genome shotgun sequence	100	1	Bacteria;Firmicutes;Clostridia;Eubacteriales;Christensenellaceae;Guopingia;Guopingia_tenuis
k127_3194870	1442	db_customA	S	JACRSS010000006.1	98.336	1	1442	0	2521	1442	JACRSS010000006.1 Guopingia tenuis strain NSJ-63 L27_ctg006; whole genome shotgun sequence	100	1	Bacteria;Firmicutes;Clostridia;Eubacteriales;Christensenellaceae;Guopingia;Guopingia_tenuis
k127_3197941	1058	db_customA	S	JACRSS010000001.1	97.543	1	1058	0	1810	1058	JACRSS010000001.1 Guopingia tenuis strain NSJ-63 L27_ctg001; whole genome shotgun sequence	100	1	Bacteria;Firmicutes;Clostridia;Eubacteriales;Christensenellaceae;Guopingia;Guopingia_tenuis
k127_3206499	1950	db_customA	S	JACRSS010000002.1	98.359	1	1950	0	3424	1950	JACRSS010000002.1 Guopingia tenuis strain NSJ-63 L27_ctg002; whole genome shotgun sequence	100	1	Bacteria;Firmicutes;Clostridia;Eubacteriales;Christensenellaceae;Guopingia;Guopingia_tenuis
k127_321343	2141	db_customA	S	JACRSS010000001.1	98.832	1	2141	0	3816	2141	JACRSS010000001.1 Guopingia tenuis strain NSJ-63 L27_ctg001; whole genome shotgun sequence	100	1	Bacteria;Firmicutes;Clostridia;Eubacteriales;Christensenellaceae;Guopingia;Guopingia_tenuis
k127_3229689	1225	db_customA	S	JACRSS010000001.1	97.814	1	1225	0	2121	1225	JACRSS010000001.1 Guopingia tenuis strain NSJ-63 L27_ctg001; whole genome shotgun sequence	100	1	Bacteria;Firmicutes;Clostridia;Eubacteriales;Christensenellaceae;Guopingia;Guopingia_tenuis
k127_3233836	1189	db_customA	S	JACRSS010000001.1	97.393	1	1189	0	2025	1189	JACRSS010000001.1 Guopingia tenuis strain NSJ-63 L27_ctg001; whole genome shotgun sequence	100	1	Bacteria;Firmicutes;Clostridia;Eubacteriales;Christensenellaceae;Guopingia;Guopingia_tenuis
k127_3239125	677	db_customA	S	JACRSS010000002.1	99.705	1	677	0	1240	677	JACRSS010000002.1 Guopingia tenuis strain NSJ-63 L27_ctg002; whole genome shotgun sequence	100	1	Bacteria;Firmicutes;Clostridia;Eubacteriales;Christensenellaceae;Guopingia;Guopingia_tenuis
k127_3263650	2211	db_customA	S	JACRSS010000003.1	98.779	1	2211	0	3934	2211	JACRSS010000003.1 Guopingia tenuis strain NSJ-63 L27_ctg003; whole genome shotgun sequence	100	1	Bacteria;Firmicutes;Clostridia;Eubacteriales;Christensenellaceae;Guopingia;Guopingia_tenuis
k127_3282174	1316	db_customA	S	JACRSS010000001.1	98.557	1	1316	0	2326	1316	JACRSS010000001.1 Guopingia tenuis strain NSJ-63 L27_ctg001; whole genome shotgun sequence	100	1	Bacteria;Firmicutes;Clostridia;Eubacteriales;Christensenellaceae;Guopingia;Guopingia_tenuis
k127_3283583	1949	db_customA	S	JACRSS010000001.1	99.333	1	1949	0	3528	1949	JACRSS010000001.1 Guopingia tenuis strain NSJ-63 L27_ctg001; whole genome shotgun sequence	100	1	Bacteria;Firmicutes;Clostridia;Eubacteriales;Christensenellaceae;Guopingia;Guopingia_tenuis
k127_3311818	2044	db_customA	S	JACRSS010000002.1	99.266	1	2044	0	3692	2044	JACRSS010000002.1 Guopingia tenuis strain NSJ-63 L27_ctg002; whole genome shotgun sequence	100	1	Bacteria;Firmicutes;Clostridia;Eubacteriales;Christensenellaceae;Guopingia;Guopingia_tenuis
k127_335659	902	db_customA	S	JACRSS010000001.1	99.224	1	902	0	1628	902	JACRSS010000001.1 Guopingia tenuis strain NSJ-63 L27_ctg001; whole genome shotgun sequence	100	1	Bacteria;Firmicutes;Clostridia;Eubacteriales;Christensenellaceae;Guopingia;Guopingia_tenuis
k127_3379637	2120	db_customA	S	JACRSS010000003.1	98.868	1	2120	0	3783	2120	JACRSS010000003.1 Guopingia tenuis strain NSJ-63 L27_ctg003; whole genome shotgun sequence	100	1	Bacteria;Firmicutes;Clostridia;Eubacteriales;Christensenellaceae;Guopingia;Guopingia_tenuis
k127_3411545	2223	db_customA	S	JACRSS010000006.1	97.841	1	2223	0	3840	2223	JACRSS010000006.1 Guopingia tenuis strain NSJ-63 L27_ctg006; whole genome shotgun sequence	100	1	Bacteria;Firmicutes;Clostridia;Eubacteriales;Christensenellaceae;Guopingia;Guopingia_tenuis
k127_3435390	1518	db_customA	S	JACRSS010000001.1	98.881	1	1518	0	2708	1518	JACRSS010000001.1 Guopingia tenuis strain NSJ-63 L27_ctg001; whole genome shotgun sequence	100	1	Bacteria;Firmicutes;Clostridia;Eubacteriales;Christensenellaceae;Guopingia;Guopingia_tenuis
k127_3452395	1504	db_customA	S	JACRSS010000001.1	97.143	1	1504	0	2540	1504	JACRSS010000001.1 Guopingia tenuis strain NSJ-63 L27_ctg001; whole genome shotgun sequence	100	1	Bacteria;Firmicutes;Clostridia;Eubacteriales;Christensenellaceae;Guopingia;Guopingia_tenuis
k127_3479750	1718	db_customA	S	JACRSS010000003.1	97.788	1	1718	0	2961	1718	JACRSS010000003.1 Guopingia tenuis strain NSJ-63 L27_ctg003; whole genome shotgun sequence	100	1	Bacteria;Firmicutes;Clostridia;Eubacteriales;Christensenellaceae;Guopingia;Guopingia_tenuis
k127_3494639	767	db_customA	S	JACRSS010000001.1	98.175	1	767	0	1339	767	JACRSS010000001.1 Guopingia tenuis strain NSJ-63 L27_ctg001; whole genome shotgun sequence	100	1	Bacteria;Firmicutes;Clostridia;Eubacteriales;Christensenellaceae;Guopingia;Guopingia_tenuis
k127_351605	551	db_customA	S	JACRSS010000001.1	100	159	551	0	726	551	JACRSS010000001.1 Guopingia tenuis strain NSJ-63 L27_ctg001; whole genome shotgun sequence	71.3249	1	Bacteria;Firmicutes;Clostridia;Eubacteriales;Christensenellaceae;Guopingia;Guopingia_tenuis
k127_352945	1717	db_customA	S	JACRSS010000003.1	98.602	1	1717	0	3038	1717	JACRSS010000003.1 Guopingia tenuis strain NSJ-63 L27_ctg003; whole genome shotgun sequence	100	1	Bacteria;Firmicutes;Clostridia;Eubacteriales;Christensenellaceae;Guopingia;Guopingia_tenuis
k127_3530084	2052	db_customA	S	JACRSS010000004.1	98.733	1	2052	0	3646	2052	JACRSS010000004.1 Guopingia tenuis strain NSJ-63 L27_ctg004; whole genome shotgun sequence	100	1	Bacteria;Firmicutes;Clostridia;Eubacteriales;Christensenellaceae;Guopingia;Guopingia_tenuis
k127_35363	2836	db_customA	S	JACRSS010000002.1	98.378	1	2836	0	4968	2836	JACRSS010000002.1 Guopingia tenuis strain NSJ-63 L27_ctg002; whole genome shotgun sequence	100	1	Bacteria;Firmicutes;Clostridia;Eubacteriales;Christensenellaceae;Guopingia;Guopingia_tenuis
k127_3548123	1724	db_customA	S	JACRSS010000006.1	97.735	4	1724	0	2963	1724	JACRSS010000006.1 Guopingia tenuis strain NSJ-63 L27_ctg006; whole genome shotgun sequence	99.884	1	Bacteria;Firmicutes;Clostridia;Eubacteriales;Christensenellaceae;Guopingia;Guopingia_tenuis
k127_3576216	1379	db_customA	S	JACRSS010000004.1	99.202	1	1379	0	2486	1379	JACRSS010000004.1 Guopingia tenuis strain NSJ-63 L27_ctg004; whole genome shotgun sequence	100	1	Bacteria;Firmicutes;Clostridia;Eubacteriales;Christensenellaceae;Guopingia;Guopingia_tenuis
k127_36262	1419	db_customA	S	JACRSS010000004.1	99.084	1	1419	0	2549	1419	JACRSS010000004.1 Guopingia tenuis strain NSJ-63 L27_ctg004; whole genome shotgun sequence	100	1	Bacteria;Firmicutes;Clostridia;Eubacteriales;Christensenellaceae;Guopingia;Guopingia_tenuis
k127_3633775	1017	db_customA	S	JACRSS010000003.1	98.427	1	1017	0	1790	1017	JACRSS010000003.1 Guopingia tenuis strain NSJ-63 L27_ctg003; whole genome shotgun sequence	100	1	Bacteria;Firmicutes;Clostridia;Eubacteriales;Christensenellaceae;Guopingia;Guopingia_tenuis
k127_3634994	1387	db_customA	S	JACRSS010000002.1	97.621	1	1387	0	2379	1387	JACRSS010000002.1 Guopingia tenuis strain NSJ-63 L27_ctg002; whole genome shotgun sequence	100	1	Bacteria;Firmicutes;Clostridia;Eubacteriales;Christensenellaceae;Guopingia;Guopingia_tenuis
k127_3635168	1069	db_customA	S	JACRSS010000003.1	98.036	1	1069	0	1858	1069	JACRSS010000003.1 Guopingia tenuis strain NSJ-63 L27_ctg003; whole genome shotgun sequence	100	1	Bacteria;Firmicutes;Clostridia;Eubacteriales;Christensenellaceae;Guopingia;Guopingia_tenuis
k127_3644147	3794	db_customA	S	JACRSS010000001.1	99.104	1	3794	0	6818	3794	JACRSS010000001.1 Guopingia tenuis strain NSJ-63 L27_ctg001; whole genome shotgun sequence	100	1	Bacteria;Firmicutes;Clostridia;Eubacteriales;Christensenellaceae;Guopingia;Guopingia_tenuis
k127_3650215	2267	db_customA	S	JACRSS010000005.1	99.03	1	2267	0	4065	2267	JACRSS010000005.1 Guopingia tenuis strain NSJ-63 L27_ctg005; whole genome shotgun sequence	100	1	Bacteria;Firmicutes;Clostridia;Eubacteriales;Christensenellaceae;Guopingia;Guopingia_tenuis
k127_3652246	1842	db_customA	S	JACRSS010000006.1	99.837	1	1842	0	3386	1842	JACRSS010000006.1 Guopingia tenuis strain NSJ-63 L27_ctg006; whole genome shotgun sequence	100	1	Bacteria;Firmicutes;Clostridia;Eubacteriales;Christensenellaceae;Guopingia;Guopingia_tenuis
k127_3704724	930	db_customA	S	JACRSS010000003.1	98.232	26	930	0	1583	930	JACRSS010000003.1 Guopingia tenuis strain NSJ-63 L27_ctg003; whole genome shotgun sequence	97.3118	1	Bacteria;Firmicutes;Clostridia;Eubacteriales;Christensenellaceae;Guopingia;Guopingia_tenuis
k127_3759360	1736	db_customA	S	JACRSS010000003.1	97.182	1	1736	0	2937	1736	JACRSS010000003.1 Guopingia tenuis strain NSJ-63 L27_ctg003; whole genome shotgun sequence	100	1	Bacteria;Firmicutes;Clostridia;Eubacteriales;Christensenellaceae;Guopingia;Guopingia_tenuis
k127_3759407	1171	db_customA	S	JACRSS010000006.1	98.463	1	1171	0	2063	1171	JACRSS010000006.1 Guopingia tenuis strain NSJ-63 L27_ctg006; whole genome shotgun sequence	100	1	Bacteria;Firmicutes;Clostridia;Eubacteriales;Christensenellaceae;Guopingia;Guopingia_tenuis
k127_3761048	398	db_customA	S	JACRSS010000006.1	99.497	1	398	0	725	398	JACRSS010000006.1 Guopingia tenuis strain NSJ-63 L27_ctg006; whole genome shotgun sequence	100	1	Bacteria;Firmicutes;Clostridia;Eubacteriales;Christensenellaceae;Guopingia;Guopingia_tenuis
k127_376115	1981	db_customA	S	JACRSS010000001.1	97.706	1	1526	0	2625	1981	JACRSS010000001.1 Guopingia tenuis strain NSJ-63 L27_ctg001; whole genome shotgun sequence	77.0318	1	Bacteria;Firmicutes;Clostridia;Eubacteriales;Christensenellaceae;Guopingia;Guopingia_tenuis
k127_3763524	936	db_customA	S	JACRSS010000001.1	97.118	1	936	0	1570	936	JACRSS010000001.1 Guopingia tenuis strain NSJ-63 L27_ctg001; whole genome shotgun sequence	100	1	Bacteria;Firmicutes;Clostridia;Eubacteriales;Christensenellaceae;Guopingia;Guopingia_tenuis
k127_3766989	2182	db_customA	S	JACRSS010000001.1	98.533	1	2182	0	3853	2182	JACRSS010000001.1 Guopingia tenuis strain NSJ-63 L27_ctg001; whole genome shotgun sequence	100	1	Bacteria;Firmicutes;Clostridia;Eubacteriales;Christensenellaceae;Guopingia;Guopingia_tenuis
k127_3801036	830	db_customA	S	JACRSS010000001.1	97.952	1	830	0	1439	830	JACRSS010000001.1 Guopingia tenuis strain NSJ-63 L27_ctg001; whole genome shotgun sequence	100	1	Bacteria;Firmicutes;Clostridia;Eubacteriales;Christensenellaceae;Guopingia;Guopingia_tenuis
k127_3850021	2093	db_customA	S	JACRSS010000002.1	98.615	1	2093	0	3705	2093	JACRSS010000002.1 Guopingia tenuis strain NSJ-63 L27_ctg002; whole genome shotgun sequence	100	1	Bacteria;Firmicutes;Clostridia;Eubacteriales;Christensenellaceae;Guopingia;Guopingia_tenuis
k127_3924187	694	db_customA	S	JACRSS010000002.1	99.568	1	694	0	1266	694	JACRSS010000002.1 Guopingia tenuis strain NSJ-63 L27_ctg002; whole genome shotgun sequence	100	1	Bacteria;Firmicutes;Clostridia;Eubacteriales;Christensenellaceae;Guopingia;Guopingia_tenuis
k127_3970192	860	db_customA	S	JACRSS010000004.1	97.552	3	860	0	1469	860	JACRSS010000004.1 Guopingia tenuis strain NSJ-63 L27_ctg004; whole genome shotgun sequence	99.7674	1	Bacteria;Firmicutes;Clostridia;Eubacteriales;Christensenellaceae;Guopingia;Guopingia_tenuis
k127_4022944	1787	db_customA	S	JACRSS010000001.1	97.929	1	1787	0	3096	1787	JACRSS010000001.1 Guopingia tenuis strain NSJ-63 L27_ctg001; whole genome shotgun sequence	100	1	Bacteria;Firmicutes;Clostridia;Eubacteriales;Christensenellaceae;Guopingia;Guopingia_tenuis
k127_4038612	1874	db_customA	S	JACRSS010000001.1	98.616	1	1874	0	3319	1874	JACRSS010000001.1 Guopingia tenuis strain NSJ-63 L27_ctg001; whole genome shotgun sequence	100	1	Bacteria;Firmicutes;Clostridia;Eubacteriales;Christensenellaceae;Guopingia;Guopingia_tenuis
k127_4103147	2592	db_customA	S	JACRSS010000002.1	97.984	1601	2592	0	1722	2592	JACRSS010000002.1 Guopingia tenuis strain NSJ-63 L27_ctg002; whole genome shotgun sequence	38.2716	1	Bacteria;Firmicutes;Clostridia;Eubacteriales;Christensenellaceae;Guopingia;Guopingia_tenuis
k127_4106075	916	db_customA	S	JACRSS010000001.1	98.677	161	916	0	1341	916	JACRSS010000001.1 Guopingia tenuis strain NSJ-63 L27_ctg001; whole genome shotgun sequence	82.5328	1	Bacteria;Firmicutes;Clostridia;Eubacteriales;Christensenellaceae;Guopingia;Guopingia_tenuis
k127_411260	3599	db_customA	S	JACRSS010000004.1	99.694	1	3599	0	6586	3599	JACRSS010000004.1 Guopingia tenuis strain NSJ-63 L27_ctg004; whole genome shotgun sequence	100	1	Bacteria;Firmicutes;Clostridia;Eubacteriales;Christensenellaceae;Guopingia;Guopingia_tenuis
k127_41175	976	db_customA	S	JACRSS010000004.1	99.283	1	976	0	1764	976	JACRSS010000004.1 Guopingia tenuis strain NSJ-63 L27_ctg004; whole genome shotgun sequence	100	1	Bacteria;Firmicutes;Clostridia;Eubacteriales;Christensenellaceae;Guopingia;Guopingia_tenuis
k127_412472	1490	db_customA	S	JACRSS010000001.1	98.792	1	1490	0	2652	1490	JACRSS010000001.1 Guopingia tenuis strain NSJ-63 L27_ctg001; whole genome shotgun sequence	100	1	Bacteria;Firmicutes;Clostridia;Eubacteriales;Christensenellaceae;Guopingia;Guopingia_tenuis
k127_4128062	1382	db_customA	S	JACRSS010000001.1	98.479	2	1382	0	2435	1382	JACRSS010000001.1 Guopingia tenuis strain NSJ-63 L27_ctg001; whole genome shotgun sequence	99.9276	1	Bacteria;Firmicutes;Clostridia;Eubacteriales;Christensenellaceae;Guopingia;Guopingia_tenuis
k127_4149680	1409	db_customA	S	JACRSS010000001.1	98.227	1	1409	0	2464	1409	JACRSS010000001.1 Guopingia tenuis strain NSJ-63 L27_ctg001; whole genome shotgun sequence	100	1	Bacteria;Firmicutes;Clostridia;Eubacteriales;Christensenellaceae;Guopingia;Guopingia_tenuis
k127_4160353	2298	db_customA	S	JACRSS010000003.1	98.564	1	2298	0	4061	2298	JACRSS010000003.1 Guopingia tenuis strain NSJ-63 L27_ctg003; whole genome shotgun sequence	100	1	Bacteria;Firmicutes;Clostridia;Eubacteriales;Christensenellaceae;Guopingia;Guopingia_tenuis
k127_4192359	1459	db_customA	S	JACRSS010000003.1	99.109	1	1459	0	2623	1459	JACRSS010000003.1 Guopingia tenuis strain NSJ-63 L27_ctg003; whole genome shotgun sequence	100	1	Bacteria;Firmicutes;Clostridia;Eubacteriales;Christensenellaceae;Guopingia;Guopingia_tenuis
k127_4200723	3125	db_customA	S	JACRSS010000001.1	97.334	1	3113	0	5278	3125	JACRSS010000001.1 Guopingia tenuis strain NSJ-63 L27_ctg001; whole genome shotgun sequence	99.616	1	Bacteria;Firmicutes;Clostridia;Eubacteriales;Christensenellaceae;Guopingia;Guopingia_tenuis
k127_4201164	1242	db_customA	S	JACRSS010000001.1	98.953	1	1242	0	2222	1242	JACRSS010000001.1 Guopingia tenuis strain NSJ-63 L27_ctg001; whole genome shotgun sequence	100	1	Bacteria;Firmicutes;Clostridia;Eubacteriales;Christensenellaceae;Guopingia;Guopingia_tenuis
[truncated: 44,132 more rows]

## Sheet: anaero
contig	contig_length	blastn|database	blastn|LowestTaxon	blastn|sseqid	blastn|pident	blastn|qstart	blastn|qend	blastn|evalue	blastn|bitscore	blastn|qlen	blastn|stitle	blastn|qcov	blastn|region	blastn|NCBI_Tax
[truncated: 283 more rows]

## Sheet: species_annotation
contig	contig_length	blastn|database	blastn|LowestTaxon	blastn|sseqid	blastn|pident	blastn|qstart	blastn|qend	blastn|evalue	blastn|bitscore	blastn|qlen	blastn|stitle	blastn|qcov	blastn|NCBI_Tax
[truncated: 11,936 more rows]

[truncated: 5 more sheets: WGS contig annotation filtering, LAR species filtered, LAR DAspecies filtered, ISS species filtered , ISS DA species filtered]
