# Supplementary material for: Spaceflight alters host-gut microbiota interactions
Source: Research Square preprint supplement (doi:10.21203/rs.3.rs-3879489/v1), 2024-06-11
Supplement: Supplementary file 3 [file 9d0ad8f975b2b7c5de3706a0.xlsx]

## Sheet: Help
run
Sample	Sample names
Total_reads	Total number of paired-end reads in each sample
Merged_reads	Number of successfully assembled reads
Amplicon_Count	ESV total count per sample
Overall_retained_reads_rate	Percentage of surviving raw reads (from raw reads to final inferred amplicons)
ESV_summary
lowestTaxLevel	each taxonomic level
total_ESVs_per_taxon	Total number of ESVs (TOTAL ESVs column) splitted per taxonomic level
ambiguous_ESVs_per_taxon	Number of ambiguous returns for each taxon call
perfect_identity	Number of ESVs that have 100% identity
perfect_coverage	Number of ESVs that have 100% coverage
identity_average	ESV sequence vs database sequence average alignment identity percentage
cov_average	ESV sequence vs database sequence average alignment coverage percentage
Total_raw_counts	Total ESV raw counts per each taxonomic level across samples
percentage_count	Total ESV relative counts per each taxonomic level across samples
ESV_table
ESV	ESV name
lowestTaxLevel	lowest level reached in taxonomic hierarchy
NumberOfAmbiguousHits	number of ambiguous ESV labels
identity	blastn identity
coverageQ	alignment coverage (ESV sequence)
chimera	flag Y or N
AmbiguousLabels	List of ambiguous ESV labels
subjectid	BLASTn dabatabase accession ID
Domain	Taxonomy level
Phylum	Taxonomy level
Class	Taxonomy level
Order	Taxonomy level
Family	Taxonomy level
Genus	Taxonomy level
Species	Taxonomy level
sequence	numcleotide sequence
sample1	Sample counts
DA_analysis
ESV	ESV name
FactorA_rlog	average normalized counts for factor A
FactorB_rlog	average normalized counts for factor B
Regulation	Significantly more abundant condition
baseMean	average normalized counts across all samples (DESeq2)
log2FoldChange	fold change (log2 transformed)
lfcSE	log2FoldChange standard error
stat	DESeq2 staat value
pvalue	p value
padj	adjusted p value
lowestTaxLevel	lowest level reached in taxonomic hierarchy
NumberOfAmbiguousHits	number of ambiguous ESV labels
identity	blastn identity
coverageQ	alignment coverage (ESV sequence)
chimera	flag Y or N
AmbiguousLabels	List of ambiguous ESV labels
subjectid	BLASTn dabatabase accession ID
Domain	Taxonomy level
Phylum	Taxonomy level
Class	Taxonomy level
Order	Taxonomy level
Family	Taxonomy level
Genus	Taxonomy level
Species	Taxonomy level
sequence	numcleotide sequence
sample1	Sample counts
alphaDiversity
alphaDiv_Index	Alpha diversity index
TestType	parametric / non parametric test
pVal	pvalue
padj	ajusted pvalue
Stat	Alpha diversity statistical test value
intConf1	confidence interval
intConf2	confidence interval
ordination
ordination_Method	Method used for ordination
varianceExplained	explained intertia of the constrained component
anova_pValue	permanova-like permutation test p value
signif	level of significance flag

## Sheet: run
Sample	Total_reads	Merged_reads	Amplicon_Count	Overall_retained_reads_rate
FLT_ISS_Rep1	79412	69052	63180	79.5598
FLT_ISS_Rep2	85211	74696	68621	80.5307
FLT_ISS_Rep3	79855	69577	63601	79.6456
FLT_ISS_Rep4	73293	64243	58799	80.2246
FLT_ISS_Rep5	76088	66326	60590	79.6315
FLT_ISS_Rep6	69944	61124	55689	79.6194
FLT_ISS_Rep7	75193	65832	59742	79.4515
FLT_LAR_Rep1	77720	67733	61748	79.4493
FLT_LAR_Rep2	84431	73185	66294	78.5186
FLT_LAR_Rep3	83108	72302	65338	78.6182
FLT_LAR_Rep4	84638	73511	67142	79.3284
FLT_LAR_Rep5	72785	62840	57566	79.0905
FLT_LAR_Rep6	67391	58362	53522	79.4201
FLT_LAR_Rep7	72752	63494	57672	79.272
FLT_LAR_Rep8	81335	70882	64658	79.4959
FLT_LAR_Rep9	86356	75052	68979	79.8775
GC_ISS_Rep1	67965	59412	53349	78.4948
GC_ISS_Rep2	79016	68829	62449	79.0334
GC_ISS_Rep3	71023	61881	56779	79.9445
GC_ISS_Rep4	81784	70696	63979	78.2292
GC_ISS_Rep5	68497	59954	55353	80.8108
GC_ISS_Rep6	85332	74382	67804	79.4591
GC_ISS_Rep7	80075	69712	63985	79.9063
GC_ISS_Rep8	64102	55748	51048	79.6356
GC_ISS_Rep9	66527	58303	53882	80.9927
GC_LAR_Rep1	76429	66213	60065	78.5893
GC_LAR_Rep2	68717	59543	54363	79.1114
GC_LAR_Rep3	81765	71204	65558	80.1786
GC_LAR_Rep4	69368	60347	54860	79.0855
GC_LAR_Rep5	84606	73581	66998	79.1882
GC_LAR_Rep6	86707	75520	69521	80.1792
GC_LAR_Rep7	83062	72775	66588	80.1666
TOTAL	2464487	2146311	1959722	NA
AVERAGE	77015.2	67072.2	61241.3	79.5231

## Sheet: ESV_summary
lowestTaxLevel	total_OTUs_per_taxon	ambiguous_OTUs_per_taxon	perfect_identity	perfect_coverage	identity_average	cov_average	Total_raw_counts	percentage_count
Species	35	11	35	35	100	100	1432321	73.088
Genus	12	0	10	11	99.8858	99.9429	88726	4.52748
Family	11	0	7	10	99.7821	99.9375	216800	11.0628
Order	0	0	0	0	0	0	0	0
Class	0	0	0	0	0	0	0	0
Phylum	0	0	0	0	0	0	0	0
Domain	0	0	0	0	0	0	0	0
Unknown	74	0	0	0	0	0	221875	11.3218
OVERALL	132	11	52	56	74.917	74.9701	1959722	100

## Sheet: ESV_table
ESV	lowestTaxLevel	NumberOfAmbiguousHits	identity	coverageQ	chimera	AmbiguousLabels	subjectid	Domain	Phylum	Class	Order	Family	Genus	Species	totalcounts
Acetatifactor_1	G	0	100	100	N	Acetatifactor	nt|MK287750.1	Bacteria	Firmicutes	Clostridia	Eubacteriales	Lachnospiraceae	Acetatifactor	Acetatifactor	7282
Acinetobacter_MS_1	S	9	100	100	N	Acinetobacter_bereziniae;Acinetobacter_courvalinii;Acinetobacter_gerneri;Acinetobacter_guillouiae;Acinetobacter_gyllenbergii;Acinetobacter_junii;Acinetobacter_modestus;Acinetobacter_proteolyticus;Acinetobacter_vivianii	16S_ribosomal_RNA|NR_026208.1;16S_ribosomal_RNA|NR_042026.1;16S_ribosomal_RNA|NR_117625.1;16S_ribosomal_RNA|NR_117626.1;16S_ribosomal_RNA|NR_117627.1;16S_ribosomal_RNA|NR_148843.1;16S_ribosomal_RNA|NR_148845.1;16S_ribosomal_RNA|NR_148846.1;16S_ribosomal_RNA|NR_148847.1	Bacteria	Proteobacteria	Gammaproteobacteria	Moraxellales	Moraxellaceae	Acinetobacter	Acinetobacter_MS	372
Adlercreutzia_equolifaciens_1	S	0	100	100	N	Adlercreutzia_equolifaciens	16S_ribosomal_RNA|NR_041494.1	Bacteria	Actinobacteria	Coriobacteriia	Eggerthellales	Eggerthellaceae	Adlercreutzia	Adlercreutzia_equolifaciens	2887
Anaerostipes_caccae_1	S	0	100	100	N	Anaerostipes_caccae	16S_ribosomal_RNA|NR_028915.1	Bacteria	Firmicutes	Clostridia	Eubacteriales	Lachnospiraceae	Anaerostipes	Anaerostipes_caccae	451
Anaerotignum_1	G	0	100	100	N	Anaerotignum	nt|MK287759.1	Bacteria	Firmicutes	Clostridia	Eubacteriales	Lachnospiraceae	Anaerotignum	Anaerotignum	3010
Anaerotignum_2	G	0	100	100	N	Anaerotignum	nt|MK287763.1	Bacteria	Firmicutes	Clostridia	Eubacteriales	Lachnospiraceae	Anaerotignum	Anaerotignum	3164
Anaerotruncus_1	G	0	100	100	N	Anaerotruncus	nt|MK287644.1	Bacteria	Firmicutes	Clostridia	Eubacteriales	Oscillospiraceae	Anaerotruncus	Anaerotruncus	12391
Anaerotruncus_colihominis_1	S	0	100	100	N	Anaerotruncus_colihominis	16S_ribosomal_RNA|NR_027558.1	Bacteria	Firmicutes	Clostridia	Eubacteriales	Oscillospiraceae	Anaerotruncus	Anaerotruncus_colihominis	8085
Blautia_MS_1	S	3	100	100	N	Blautia_hansenii;Blautia_hominis;Blautia_marasmi	16S_ribosomal_RNA|NR_104687.1;16S_ribosomal_RNA|NR_147395.1;16S_ribosomal_RNA|NR_163634.1	Bacteria	Firmicutes	Clostridia	Eubacteriales	Lachnospiraceae	Blautia	Blautia_MS	10347
Clostridiaceae_1	F	0	100	100	N	Clostridiaceae	nt|EU728744.1	Bacteria	Firmicutes	Clostridia	Eubacteriales	Clostridiaceae	Clostridiaceae	Clostridiaceae	56309
Clostridioides_difficile_1	S	0	100	100	N	Clostridioides_difficile	16S_ribosomal_RNA|NR_113132.1	Bacteria	Firmicutes	Clostridia	Eubacteriales	Peptostreptococcaceae	Clostridioides	Clostridioides_difficile	23629
Clostridium_1	G	0	99.315	100	N	Clostridium	nt|AB622825.1	Bacteria	Firmicutes	Clostridia	Eubacteriales	Clostridiaceae	Clostridium	Clostridium	5696
Clostridium_2	G	0	99.315	100	N	Clostridium	nt|AB622837.1	Bacteria	Firmicutes	Clostridia	Eubacteriales	Clostridiaceae	Clostridium	Clostridium	19538
Clostridium_3	G	0	100	100	N	Clostridium	nt|AF157052.1	Bacteria	Firmicutes	Clostridia	Eubacteriales	Clostridiaceae	Clostridium	Clostridium	3834
Clostridium_4	G	0	100	99.3151	N	Clostridium	nt|MW768246.1	Bacteria	Firmicutes	Clostridia	Eubacteriales	Clostridiaceae	Clostridium	Clostridium	3546
Clostridium_scindens_1	S	0	100	100	N	Clostridium_scindens	16S_ribosomal_RNA|NR_028785.1	Bacteria	Firmicutes	Clostridia	Eubacteriales	Clostridiaceae	Clostridium	Clostridium_scindens	2656
Clostridium_symbiosum_1	S	0	100	100	N	Clostridium_symbiosum	nt|EF025909.1	Bacteria	Firmicutes	Clostridia	Eubacteriales	Clostridiaceae	Clostridium	Clostridium_symbiosum	23108
Coprobacillus_cateniformis_1	S	0	100	100	N	Coprobacillus_cateniformis	nt|GU811876.1	Bacteria	Firmicutes	Erysipelotrichia	Erysipelotrichales	Coprobacillaceae	Coprobacillus	Coprobacillus_cateniformis	12452
Delftia_MS_1	S	3	100	100	N	Delftia_acidovorans;Delftia_lacustris;Delftia_tsuruhatensis	16S_ribosomal_RNA|NR_024786.1;16S_ribosomal_RNA|NR_113708.1;16S_ribosomal_RNA|NR_116495.1	Bacteria	Proteobacteria	Betaproteobacteria	Burkholderiales	Comamonadaceae	Delftia	Delftia_MS	241
Dysosmobacter_welbionis_1	S	0	100	100	N		nt|CP034413.3;nt|LT558848.1	Bacteria	Firmicutes	Clostridia	Eubacteriales	Oscillospiraceae	Dysosmobacter	Dysosmobacter_welbionis	579
Eisenbergiella_1	G	0	100	100	N	Eisenbergiella	nt|MK287744.1	Bacteria	Firmicutes	Clostridia	Eubacteriales	Lachnospiraceae	Eisenbergiella	Eisenbergiella	18653
Eisenbergiella_massiliensis_1	S	0	100	100	N	Eisenbergiella_massiliensis	16S_ribosomal_RNA|NR_144731.1	Bacteria	Firmicutes	Clostridia	Eubacteriales	Lachnospiraceae	Eisenbergiella	Eisenbergiella_massiliensis	8044
Enterobacteriaceae_MS_1	S	7	100	100	N	Escherichia_coli;Escherichia_fergusonii;Escherichia_marmotae;Pseudescherichia_vulneris;Shigella_boydii;Shigella_flexneri;Shigella_sonnei	16S_ribosomal_RNA|NR_024570.1;16S_ribosomal_RNA|NR_026331.1;16S_ribosomal_RNA|NR_027549.1;16S_ribosomal_RNA|NR_104826.1;16S_ribosomal_RNA|NR_104901.1;16S_ribosomal_RNA|NR_119109.1;16S_ribosomal_RNA|NR_136472.1	Bacteria	Proteobacteria	Gammaproteobacteria	Enterobacterales	Enterobacteriaceae	Enterobacteriaceae_MS	Enterobacteriaceae_MS	5152
Enterocloster_aldenensis_1	S	0	100	100	N	Enterocloster_aldenensis	16S_ribosomal_RNA|NR_043680.1	Bacteria	Firmicutes	Clostridia	Eubacteriales	Lachnospiraceae	Enterocloster	Enterocloster_aldenensis	2445
Enterocloster_aldenensis_2	S	0	100	100	N	Enterocloster_aldenensis	nt|LC515574.1	Bacteria	Firmicutes	Clostridia	Eubacteriales	Lachnospiraceae	Enterocloster	Enterocloster_aldenensis	8414
Enterocloster_clostridioformis_1	S	0	100	100	N	Enterocloster_clostridioformis	nt|CP050964.1	Bacteria	Firmicutes	Clostridia	Eubacteriales	Lachnospiraceae	Enterocloster	Enterocloster_clostridioformis	1395
Enterocloster_MS_1	S	2	100	100	N	Enterocloster_bolteae;Enterocloster_clostridioformis	16S_ribosomal_RNA|NR_025567.1;16S_ribosomal_RNA|NR_118128.1	Bacteria	Firmicutes	Clostridia	Eubacteriales	Lachnospiraceae	Enterocloster	Enterocloster_MS	61871
Enterocloster_MS_2	S	2	100	100	N	Enterocloster_asparagiformis;Enterocloster_lavalensis	16S_ribosomal_RNA|NR_042200.1;16S_ribosomal_RNA|NR_044289.1	Bacteria	Firmicutes	Clostridia	Eubacteriales	Lachnospiraceae	Enterocloster	Enterocloster_MS	16396
Enterococcus_MS_1	S	14	100	100	N	Enterococcus_canintestini;Enterococcus_canis;Enterococcus_dispar;Enterococcus_durans;Enterococcus_faecalis;Enterococcus_faecium;Enterococcus_hirae;Enterococcus_lactis;Enterococcus_mundtii;Enterococcus_olivae;Enterococcus_ratti;Enterococcus_rivorum;Enterococcus_saigonensis;Enterococcus_villorum	16S_ribosomal_RNA|NR_024904.1;16S_ribosomal_RNA|NR_024906.1;16S_ribosomal_RNA|NR_036921.1;16S_ribosomal_RNA|NR_036922.1;16S_ribosomal_RNA|NR_037082.1;16S_ribosomal_RNA|NR_040789.1;16S_ribosomal_RNA|NR_041933.1;16S_ribosomal_RNA|NR_042386.1;16S_ribosomal_RNA|NR_113903.1;16S_ribosomal_RNA|NR_113931.1;16S_ribosomal_RNA|NR_117043.1	Bacteria	Firmicutes	Bacilli	Lactobacillales	Enterococcaceae	Enterococcus	Enterococcus_MS	738
Erysipelatoclostridium_cocleatum_1	S	0	100	100	N	Erysipelatoclostridium_cocleatum	nt|AF028350.1	Bacteria	Firmicutes	Erysipelotrichia	Erysipelotrichales	Erysipelotrichaceae	Erysipelatoclostridium	Erysipelatoclostridium_cocleatum	69090
Erysipelatoclostridium_innocuum_1	S	0	100	100	N	Erysipelatoclostridium_innocuum	nt|AB971793.1	Bacteria	Firmicutes	Erysipelotrichia	Erysipelotrichales	Erysipelotrichaceae	Erysipelatoclostridium	Erysipelatoclostridium_innocuum	17086
Erysipelatoclostridium_saccharogumia_1	S	0	100	100	N	Erysipelatoclostridium_saccharogumia	16S_ribosomal_RNA|NR_043550.1	Bacteria	Firmicutes	Erysipelotrichia	Erysipelotrichales	Erysipelotrichaceae	Erysipelatoclostridium	Erysipelatoclostridium_saccharogumia	248
Extibacter_muris_1	S	0	100	100	N	Extibacter_muris	16S_ribosomal_RNA|NR_144610.1	Bacteria	Firmicutes	Clostridia	Eubacteriales	Lachnospiraceae	Extibacter	Extibacter_muris	727
Flavonifractor_plautii_1	S	0	100	100	N	Flavonifractor_plautii	16S_ribosomal_RNA|NR_029356.1	Bacteria	Firmicutes	Clostridia	Eubacteriales	Oscillospiraceae	Flavonifractor	Flavonifractor_plautii	13221
Guopingia_tenuis_1	F	0	100	100	N	Guopingia_tenuis	refSeq|NZ_JACRSS010000008.1	Bacteria	Firmicutes	Clostridia	Eubacteriales	Christensenellaceae	Guopingia	Guopingia_tenuis	290
Hungatella_xylanolytica_1	S	0	100	100	N	Hungatella_xylanolytica	nt|OK626617.1	Bacteria	Firmicutes	Clostridia	Eubacteriales	Clostridiaceae	Hungatella	Hungatella_xylanolytica	23688
Intestinimonas_butyriciproducens_1	S	0	100	100	N	Intestinimonas_butyriciproducens	16S_ribosomal_RNA|NR_118554.1	Bacteria	Firmicutes	Clostridia	Eubacteriales	Eubacteriales	Intestinimonas	Intestinimonas_butyriciproducens	4467
Lachnospiraceae_1	F	0	100	100	N	Lachnospiraceae	nt|KX009913.1	Bacteria	Firmicutes	Clostridia	Eubacteriales	Lachnospiraceae	Lachnospiraceae	Lachnospiraceae	3685
Lachnospiraceae_2	F	0	99.315	100	N	Lachnospiraceae	nt|KX009925.1	Bacteria	Firmicutes	Clostridia	Eubacteriales	Lachnospiraceae	Lachnospiraceae	Lachnospiraceae	426
Lachnospiraceae_3	F	0	100	100	N	Lachnospiraceae	nt|KX009926.1	Bacteria	Firmicutes	Clostridia	Eubacteriales	Lachnospiraceae	Lachnospiraceae	Lachnospiraceae	344
Lachnospiraceae_4	F	0	99.658	100	N	Lachnospiraceae	nt|MG702664.1	Bacteria	Firmicutes	Clostridia	Eubacteriales	Lachnospiraceae	Lachnospiraceae	Lachnospiraceae	1716
Lachnospiraceae_5	F	0	100	100	N	Lachnospiraceae	nt|MZ130756.1	Bacteria	Firmicutes	Clostridia	Eubacteriales	Lachnospiraceae	Lachnospiraceae	Lachnospiraceae	24541
Lachnospiraceae_6	F	0	99.315	100	N	Lachnospiraceae	nt|MZ130786.1	Bacteria	Firmicutes	Clostridia	Eubacteriales	Lachnospiraceae	Lachnospiraceae	Lachnospiraceae	677
Lachnospiraceae_7	F	0	100	100	N	Lachnospiraceae	nt|MZ130880.1	Bacteria	Firmicutes	Clostridia	Eubacteriales	Lachnospiraceae	Lachnospiraceae	Lachnospiraceae	127089
Lactococcus_MS_1	S	3	100	100	N	Lactococcus_cremoris;Lactococcus_lactis;Lactococcus_taiwanensis	16S_ribosomal_RNA|NR_040954.1;16S_ribosomal_RNA|NR_040955.1;16S_ribosomal_RNA|NR_114327.1	Bacteria	Firmicutes	Bacilli	Lactobacillales	Streptococcaceae	Lactococcus	Lactococcus_MS	4347
Ligilactobacillus_MS_1	S	4	100	100	N	Ligilactobacillus_animalis;Ligilactobacillus_apodemi;Ligilactobacillus_faecis;Ligilactobacillus_murinus	16S_ribosomal_RNA|NR_041610.1;16S_ribosomal_RNA|NR_042231.1;16S_ribosomal_RNA|NR_042367.1;16S_ribosomal_RNA|NR_114391.1	Bacteria	Firmicutes	Bacilli	Lactobacillales	Lactobacillaceae	Ligilactobacillus	Ligilactobacillus_MS	29003
Mammaliicoccus_MS_1	S	2	100	100	N	Mammaliicoccus_fleurettii;Mammaliicoccus_lentus	16S_ribosomal_RNA|NR_041326.1;16S_ribosomal_RNA|NR_043418.1	Bacteria	Firmicutes	Bacilli	Bacillales	Staphylococcaceae	Mammaliicoccus	Mammaliicoccus_MS	497
Marvinbryantia_1	G	0	100	100	N	Marvinbryantia	nt|MK287676.1	Bacteria	Firmicutes	Clostridia	Eubacteriales	Lachnospiraceae	Marvinbryantia	Marvinbryantia	3007
Massilimicrobiota_1	G	0	100	100	N	Massilimicrobiota	nt|MT967515.1	Bacteria	Firmicutes	Erysipelotrichia	Erysipelotrichales	Erysipelotrichaceae	Massilimicrobiota	Massilimicrobiota	464
Mucispirillum_schaedleri_1	S	0	100	100	N	Mucispirillum_schaedleri	16S_ribosomal_RNA|NR_042896.1	Bacteria	Deferribacteres	Deferribacteres	Deferribacterales	Deferribacteraceae	Mucispirillum	Mucispirillum_schaedleri	25795
Oscillibacter_1	G	0	100	100	N	Oscillibacter	nt|MT967828.1	Bacteria	Firmicutes	Clostridia	Eubacteriales	Oscillospiraceae	Oscillibacter	Oscillibacter	8141
Oscillibacter_valericigenes_1	S	0	100	100	N	Oscillibacter_valericigenes	nt|OK626622.1	Bacteria	Firmicutes	Clostridia	Eubacteriales	Oscillospiraceae	Oscillibacter	Oscillibacter_valericigenes	1232
Oscillospiraceae_1	F	0	99.315	100	N	Oscillospiraceae	nt|GU939203.1	Bacteria	Firmicutes	Clostridia	Eubacteriales	Oscillospiraceae	Oscillospiraceae	Oscillospiraceae	870
Oscillospiraceae_2	F	0	100	99.3127	N	Oscillospiraceae	nt|KP101892.1	Bacteria	Firmicutes	Clostridia	Eubacteriales	Oscillospiraceae	Oscillospiraceae	Oscillospiraceae	853
Parabacteroides_goldsteinii_1	S	0	100	100	N	Parabacteroides_goldsteinii	16S_ribosomal_RNA|NR_043317.1	Bacteria	Bacteroidetes	Bacteroidia	Bacteroidales	Tannerellaceae	Parabacteroides	Parabacteroides_goldsteinii	1052055
Providencia_MS_1	S	5	100	100	N	Providencia_alcalifaciens;Providencia_rettgeri;Providencia_rustigianii;Providencia_sneebia;Providencia_vermicola	16S_ribosomal_RNA|NR_042411.1;16S_ribosomal_RNA|NR_042415.1;16S_ribosomal_RNA|NR_104913.1;16S_ribosomal_RNA|NR_115879.1;16S_ribosomal_RNA|NR_115880.1	Bacteria	Proteobacteria	Gammaproteobacteria	Enterobacterales	Morganellaceae	Providencia	Providencia_MS	1098
Romboutsia_ilealis_1	S	0	100	100	N	Romboutsia_ilealis	nt|LN555523.1	Bacteria	Firmicutes	Clostridia	Eubacteriales	Peptostreptococcaceae	Romboutsia	Romboutsia_ilealis	297
Romboutsia_timonensis_1	S	0	100	100	N	Romboutsia_timonensis	16S_ribosomal_RNA|NR_144740.1	Bacteria	Firmicutes	Clostridia	Eubacteriales	Peptostreptococcaceae	Romboutsia	Romboutsia_timonensis	208
Unknown_0	U	0	0	0	Y	Unknown	Unknown	Unknown	Unknown	Unknown	Unknown	Unknown	Unknown	Unknown	273
Unknown_1	U	0	0	0	N	Unknown	Unknown	Unknown	Unknown	Unknown	Unknown	Unknown	Unknown	Unknown	11635
Unknown_10	U	0	0	0	N	Unknown	Unknown	Unknown	Unknown	Unknown	Unknown	Unknown	Unknown	Unknown	5513
Unknown_100	U	0	0	0	N	Unknown	Unknown	Unknown	Unknown	Unknown	Unknown	Unknown	Unknown	Unknown	2466
Unknown_101	U	0	0	0	N	Unknown	Unknown	Unknown	Unknown	Unknown	Unknown	Unknown	Unknown	Unknown	16833
Unknown_102	U	0	0	0	N	Unknown	Unknown	Unknown	Unknown	Unknown	Unknown	Unknown	Unknown	Unknown	386
Unknown_103	U	0	0	0	N	Unknown	Unknown	Unknown	Unknown	Unknown	Unknown	Unknown	Unknown	Unknown	545
Unknown_104	U	0	0	0	N	Unknown	Unknown	Unknown	Unknown	Unknown	Unknown	Unknown	Unknown	Unknown	6226
Unknown_105	U	0	0	0	N	Unknown	Unknown	Unknown	Unknown	Unknown	Unknown	Unknown	Unknown	Unknown	10068
Unknown_107	U	0	0	0	N	Unknown	Unknown	Unknown	Unknown	Unknown	Unknown	Unknown	Unknown	Unknown	6319
Unknown_108	U	0	0	0	N	Unknown	Unknown	Unknown	Unknown	Unknown	Unknown	Unknown	Unknown	Unknown	12364
Unknown_11	U	0	0	0	N	Unknown	Unknown	Unknown	Unknown	Unknown	Unknown	Unknown	Unknown	Unknown	701
Unknown_110	U	0	0	0	N	Unknown	Unknown	Unknown	Unknown	Unknown	Unknown	Unknown	Unknown	Unknown	1120
Unknown_113	U	0	0	0	N	Unknown	Unknown	Unknown	Unknown	Unknown	Unknown	Unknown	Unknown	Unknown	6036
Unknown_115	U	0	0	0	N	Unknown	Unknown	Unknown	Unknown	Unknown	Unknown	Unknown	Unknown	Unknown	3170
Unknown_12	U	0	0	0	N	Unknown	Unknown	Unknown	Unknown	Unknown	Unknown	Unknown	Unknown	Unknown	352
Unknown_14	U	0	0	0	N	Unknown	Unknown	Unknown	Unknown	Unknown	Unknown	Unknown	Unknown	Unknown	437
Unknown_19	U	0	0	0	N	Unknown	Unknown	Unknown	Unknown	Unknown	Unknown	Unknown	Unknown	Unknown	1604
Unknown_2	U	0	0	0	N	Unknown	Unknown	Unknown	Unknown	Unknown	Unknown	Unknown	Unknown	Unknown	729
Unknown_20	U	0	0	0	Y	Unknown	Unknown	Unknown	Unknown	Unknown	Unknown	Unknown	Unknown	Unknown	1353
Unknown_21	U	0	0	0	N	Unknown	Unknown	Unknown	Unknown	Unknown	Unknown	Unknown	Unknown	Unknown	399
Unknown_22	U	0	0	0	N	Unknown	Unknown	Unknown	Unknown	Unknown	Unknown	Unknown	Unknown	Unknown	574
Unknown_23	U	0	0	0	N	Unknown	Unknown	Unknown	Unknown	Unknown	Unknown	Unknown	Unknown	Unknown	849
Unknown_25	U	0	0	0	N	Unknown	Unknown	Unknown	Unknown	Unknown	Unknown	Unknown	Unknown	Unknown	1299
Unknown_26	U	0	0	0	N	Unknown	Unknown	Unknown	Unknown	Unknown	Unknown	Unknown	Unknown	Unknown	1289
Unknown_27	U	0	0	0	Y	Unknown	Unknown	Unknown	Unknown	Unknown	Unknown	Unknown	Unknown	Unknown	381
Unknown_28	U	0	0	0	N	Unknown	Unknown	Unknown	Unknown	Unknown	Unknown	Unknown	Unknown	Unknown	426
Unknown_3	U	0	0	0	N	Unknown	Unknown	Unknown	Unknown	Unknown	Unknown	Unknown	Unknown	Unknown	768
Unknown_30	U	0	0	0	N	Unknown	Unknown	Unknown	Unknown	Unknown	Unknown	Unknown	Unknown	Unknown	299
Unknown_32	U	0	0	0	N	Unknown	Unknown	Unknown	Unknown	Unknown	Unknown	Unknown	Unknown	Unknown	389
Unknown_33	U	0	0	0	N	Unknown	Unknown	Unknown	Unknown	Unknown	Unknown	Unknown	Unknown	Unknown	1284
Unknown_34	U	0	0	0	N	Unknown	Unknown	Unknown	Unknown	Unknown	Unknown	Unknown	Unknown	Unknown	2695
Unknown_35	U	0	0	0	N	Unknown	Unknown	Unknown	Unknown	Unknown	Unknown	Unknown	Unknown	Unknown	2373
Unknown_38	U	0	0	0	Y	Unknown	Unknown	Unknown	Unknown	Unknown	Unknown	Unknown	Unknown	Unknown	983
Unknown_39	U	0	0	0	N	Unknown	Unknown	Unknown	Unknown	Unknown	Unknown	Unknown	Unknown	Unknown	485
Unknown_40	U	0	0	0	Y	Unknown	Unknown	Unknown	Unknown	Unknown	Unknown	Unknown	Unknown	Unknown	446
Unknown_41	U	0	0	0	N	Unknown	Unknown	Unknown	Unknown	Unknown	Unknown	Unknown	Unknown	Unknown	1330
Unknown_42	U	0	0	0	N	Unknown	Unknown	Unknown	Unknown	Unknown	Unknown	Unknown	Unknown	Unknown	1406
Unknown_44	U	0	0	0	Y	Unknown	Unknown	Unknown	Unknown	Unknown	Unknown	Unknown	Unknown	Unknown	362
Unknown_46	U	0	0	0	Y	Unknown	Unknown	Unknown	Unknown	Unknown	Unknown	Unknown	Unknown	Unknown	703
Unknown_47	U	0	0	0	N	Unknown	Unknown	Unknown	Unknown	Unknown	Unknown	Unknown	Unknown	Unknown	1799
Unknown_48	U	0	0	0	N	Unknown	Unknown	Unknown	Unknown	Unknown	Unknown	Unknown	Unknown	Unknown	1955
Unknown_49	U	0	0	0	N	Unknown	Unknown	Unknown	Unknown	Unknown	Unknown	Unknown	Unknown	Unknown	480
Unknown_5	U	0	0	0	Y	Unknown	Unknown	Unknown	Unknown	Unknown	Unknown	Unknown	Unknown	Unknown	4160
Unknown_50	U	0	0	0	N	Unknown	Unknown	Unknown	Unknown	Unknown	Unknown	Unknown	Unknown	Unknown	336
Unknown_51	U	0	0	0	N	Unknown	Unknown	Unknown	Unknown	Unknown	Unknown	Unknown	Unknown	Unknown	1047
Unknown_52	U	0	0	0	N	Unknown	Unknown	Unknown	Unknown	Unknown	Unknown	Unknown	Unknown	Unknown	344
Unknown_53	U	0	0	0	N	Unknown	Unknown	Unknown	Unknown	Unknown	Unknown	Unknown	Unknown	Unknown	443
Unknown_56	U	0	0	0	Y	Unknown	Unknown	Unknown	Unknown	Unknown	Unknown	Unknown	Unknown	Unknown	679
Unknown_57	U	0	0	0	N	Unknown	Unknown	Unknown	Unknown	Unknown	Unknown	Unknown	Unknown	Unknown	664
Unknown_58	U	0	0	0	Y	Unknown	Unknown	Unknown	Unknown	Unknown	Unknown	Unknown	Unknown	Unknown	1131
Unknown_6	U	0	0	0	N	Unknown	Unknown	Unknown	Unknown	Unknown	Unknown	Unknown	Unknown	Unknown	698
Unknown_62	U	0	0	0	N	Unknown	Unknown	Unknown	Unknown	Unknown	Unknown	Unknown	Unknown	Unknown	282
Unknown_63	U	0	0	0	N	Unknown	Unknown	Unknown	Unknown	Unknown	Unknown	Unknown	Unknown	Unknown	829
Unknown_65	U	0	0	0	N	Unknown	Unknown	Unknown	Unknown	Unknown	Unknown	Unknown	Unknown	Unknown	357
Unknown_67	U	0	0	0	Y	Unknown	Unknown	Unknown	Unknown	Unknown	Unknown	Unknown	Unknown	Unknown	316
Unknown_68	U	0	0	0	N	Unknown	Unknown	Unknown	Unknown	Unknown	Unknown	Unknown	Unknown	Unknown	1499
Unknown_69	U	0	0	0	N	Unknown	Unknown	Unknown	Unknown	Unknown	Unknown	Unknown	Unknown	Unknown	468
Unknown_70	U	0	0	0	N	Unknown	Unknown	Unknown	Unknown	Unknown	Unknown	Unknown	Unknown	Unknown	610
Unknown_72	U	0	0	0	N	Unknown	Unknown	Unknown	Unknown	Unknown	Unknown	Unknown	Unknown	Unknown	1368
Unknown_74	U	0	0	0	N	Unknown	Unknown	Unknown	Unknown	Unknown	Unknown	Unknown	Unknown	Unknown	601
Unknown_75	U	0	0	0	Y	Unknown	Unknown	Unknown	Unknown	Unknown	Unknown	Unknown	Unknown	Unknown	678
Unknown_76	U	0	0	0	N	Unknown	Unknown	Unknown	Unknown	Unknown	Unknown	Unknown	Unknown	Unknown	601
Unknown_77	U	0	0	0	N	Unknown	Unknown	Unknown	Unknown	Unknown	Unknown	Unknown	Unknown	Unknown	1028
Unknown_78	U	0	0	0	Y	Unknown	Unknown	Unknown	Unknown	Unknown	Unknown	Unknown	Unknown	Unknown	255
Unknown_79	U	0	0	0	Y	Unknown	Unknown	Unknown	Unknown	Unknown	Unknown	Unknown	Unknown	Unknown	625
Unknown_8	U	0	0	0	N	Unknown	Unknown	Unknown	Unknown	Unknown	Unknown	Unknown	Unknown	Unknown	803
Unknown_81	U	0	0	0	N	Unknown	Unknown	Unknown	Unknown	Unknown	Unknown	Unknown	Unknown	Unknown	1148
Unknown_82	U	0	0	0	N	Unknown	Unknown	Unknown	Unknown	Unknown	Unknown	Unknown	Unknown	Unknown	8052
Unknown_84	U	0	0	0	N	Unknown	Unknown	Unknown	Unknown	Unknown	Unknown	Unknown	Unknown	Unknown	376
Unknown_85	U	0	0	0	N	Unknown	Unknown	Unknown	Unknown	Unknown	Unknown	Unknown	Unknown	Unknown	414
Unknown_86	U	0	0	0	N	Unknown	Unknown	Unknown	Unknown	Unknown	Unknown	Unknown	Unknown	Unknown	32904
Unknown_89	U	0	0	0	N	Unknown	Unknown	Unknown	Unknown	Unknown	Unknown	Unknown	Unknown	Unknown	47725
Unknown_9	U	0	0	0	N	Unknown	Unknown	Unknown	Unknown	Unknown	Unknown	Unknown	Unknown	Unknown	330

## Sheet: DA_analysis_LAR
ESV	GC_LAR_rlog	FLT_LAR_rlog	Regulation	baseMean	log2FoldChange	lfcSE	stat	pvalue	padj	lowestTaxLevel	NumberOfAmbiguousHits	identity	coverageQ	chimera	AmbiguousLabels	subjectid	Domain	Phylum	Class	Order	Family	Genus	Species
Acetatifactor_1	0	3.24353	FLT_LAR	111.144	25.3057	2.72753	9.27787	1.72906e-20	1.08931e-18	G	0	100	100	N	Acetatifactor	nt|MK287750.1	Bacteria	Firmicutes	Clostridia	Eubacteriales	Lachnospiraceae	Acetatifactor	Acetatifactor
Acinetobacter_MS_1	1.17449	0	FLT_LAR	0.0823072	0.485288	1.02823	0.471963	0.636953	0.729601	S	9	100	100	N	Acinetobacter_bereziniae;Acinetobacter_courvalinii;Acinetobacter_gerneri;Acinetobacter_guillouiae;Acinetobacter_gyllenbergii;Acinetobacter_junii;Acinetobacter_modestus;Acinetobacter_proteolyticus;Acinetobacter_vivianii	16S_ribosomal_RNA|NR_026208.1;16S_ribosomal_RNA|NR_042026.1;16S_ribosomal_RNA|NR_117625.1;16S_ribosomal_RNA|NR_117626.1;16S_ribosomal_RNA|NR_117627.1;16S_ribosomal_RNA|NR_148843.1;16S_ribosomal_RNA|NR_148845.1;16S_ribosomal_RNA|NR_148846.1;16S_ribosomal_RNA|NR_148847.1	Bacteria	Proteobacteria	Gammaproteobacteria	Moraxellales	Moraxellaceae	Acinetobacter	Acinetobacter_MS
Adlercreutzia_equolifaciens_1	6.22786	6.08344	GC_LAR	84.084	-0.27054	0.468066	-0.577997	0.563266	0.682419	S	0	100	100	N	Adlercreutzia_equolifaciens	16S_ribosomal_RNA|NR_041494.1	Bacteria	Actinobacteria	Coriobacteriia	Eggerthellales	Eggerthellaceae	Adlercreutzia	Adlercreutzia_equolifaciens
Anaerostipes_caccae_1	3.10198	2.15996	GC_LAR	12.826	-0.834867	0.9055	-0.921996	0.356531	0.499143	S	0	100	100	N	Anaerostipes_caccae	16S_ribosomal_RNA|NR_028915.1	Bacteria	Firmicutes	Clostridia	Eubacteriales	Lachnospiraceae	Anaerostipes	Anaerostipes_caccae
Anaerotignum_1	4.95972	3.81703	GC_LAR	140.142	-0.705827	1.47664	-0.477995	0.632654	0.729601	G	0	100	100	N	Anaerotignum	nt|MK287759.1	Bacteria	Firmicutes	Clostridia	Eubacteriales	Lachnospiraceae	Anaerotignum	Anaerotignum
Anaerotignum_2	5.54904	5.00618	GC_LAR	43.8466	-0.81544	0.585847	-1.3919	0.163953	0.279163	G	0	100	100	N	Anaerotignum	nt|MK287763.1	Bacteria	Firmicutes	Clostridia	Eubacteriales	Lachnospiraceae	Anaerotignum	Anaerotignum
Anaerotruncus_1	8.04166	8.10818	GC_LAR	540.657	-0.233234	0.93801	-0.248648	0.803633	0.858117	G	0	100	100	N	Anaerotruncus	nt|MK287644.1	Bacteria	Firmicutes	Clostridia	Eubacteriales	Oscillospiraceae	Anaerotruncus	Anaerotruncus
Anaerotruncus_colihominis_1	7.43566	8.42294	FLT_LAR	356.704	1.14721	0.579721	1.97889	0.0478279	0.141277	S	0	100	100	N	Anaerotruncus_colihominis	16S_ribosomal_RNA|NR_027558.1	Bacteria	Firmicutes	Clostridia	Eubacteriales	Oscillospiraceae	Anaerotruncus	Anaerotruncus_colihominis
Blautia_MS_1	7.4346	7.91998	FLT_LAR	228.318	0.636614	0.322258	1.97548	0.0482135	0.141277	S	3	100	100	N	Blautia_hansenii;Blautia_hominis;Blautia_marasmi	16S_ribosomal_RNA|NR_104687.1;16S_ribosomal_RNA|NR_147395.1;16S_ribosomal_RNA|NR_163634.1	Bacteria	Firmicutes	Clostridia	Eubacteriales	Lachnospiraceae	Blautia	Blautia_MS
Guopingia_tenuis_1	1.2635	2.68445	FLT_LAR	11.9013	0.736143	1.39714	0.526893	0.598268	0.704502	F	0	100	100	N	Guopingia_tenuis	refSeq|NZ_JACRSS010000008.1	Bacteria	Firmicutes	Clostridia	Eubacteriales	Christensenellaceae	Guopingia	Guopingia_tenuis
Clostridiaceae_1	10.217	10.1236	GC_LAR	1370.59	-0.147167	0.472077	-0.311743	0.755236	0.813331	F	0	100	100	N	Clostridiaceae	nt|EU728744.1	Bacteria	Firmicutes	Clostridia	Eubacteriales	Clostridiaceae	Clostridiaceae	Clostridiaceae
Clostridioides_difficile_1	8.98823	10.1887	FLT_LAR	1241.14	1.08201	0.658617	1.64285	0.100413	0.208841	S	0	100	100	N	Clostridioides_difficile	16S_ribosomal_RNA|NR_113132.1	Bacteria	Firmicutes	Clostridia	Eubacteriales	Peptostreptococcaceae	Clostridioides	Clostridioides_difficile
Clostridium_1	3.47954	3.99058	FLT_LAR	239.319	0.1941	2.05407	0.0944954	0.924716	0.94727	G	0	99.315	100	N	Clostridium	nt|AB622825.1	Bacteria	Firmicutes	Clostridia	Eubacteriales	Clostridiaceae	Clostridium	Clostridium
Clostridium_2	8.10213	7.77688	FLT_LAR	369.037	0.522037	0.761688	0.685368	0.493112	0.634001	G	0	99.315	100	N	Clostridium	nt|AB622837.1	Bacteria	Firmicutes	Clostridia	Eubacteriales	Clostridiaceae	Clostridium	Clostridium
Clostridium_3	7.23457	6.73773	FLT_LAR	179.591	0.0245026	0.673186	0.0363979	0.970965	0.978733	G	0	100	100	N	Clostridium	nt|AF157052.1	Bacteria	Firmicutes	Clostridia	Eubacteriales	Clostridiaceae	Clostridium	Clostridium
Clostridium_4	6.47278	6.14824	GC_LAR	87.2225	-0.27813	0.383677	-0.724907	0.468509	0.620642	G	0	100	99.3151	N	Clostridium	nt|MW768246.1	Bacteria	Firmicutes	Clostridia	Eubacteriales	Clostridiaceae	Clostridium	Clostridium
Clostridium_scindens_1	5.37331	4.52287	GC_LAR	47.7643	-0.547292	0.710003	-0.77083	0.440808	0.597223	S	0	100	100	N	Clostridium_scindens	16S_ribosomal_RNA|NR_028785.1	Bacteria	Firmicutes	Clostridia	Eubacteriales	Clostridiaceae	Clostridium	Clostridium_scindens
Clostridium_symbiosum_1	9.16682	9.71033	FLT_LAR	871.71	0.791557	0.466331	1.69741	0.0896183	0.201641	S	0	100	100	N	Clostridium_symbiosum	nt|EF025909.1	Bacteria	Firmicutes	Clostridia	Eubacteriales	Clostridiaceae	Clostridium	Clostridium_symbiosum
Coprobacillus_cateniformis_1	6.64429	8.51066	FLT_LAR	296.396	2.09081	0.455968	4.58543	4.53062e-06	8.91399e-05	S	0	100	100	N	Coprobacillus_cateniformis	nt|GU811876.1	Bacteria	Firmicutes	Erysipelotrichia	Erysipelotrichales	Coprobacillaceae	Coprobacillus	Coprobacillus_cateniformis
Delftia_MS_1	2.25286	2.64927	FLT_LAR	7.80861	0.653349	0.612451	1.06678	0.286072	0.424059	S	3	100	100	N	Delftia_acidovorans;Delftia_lacustris;Delftia_tsuruhatensis	16S_ribosomal_RNA|NR_024786.1;16S_ribosomal_RNA|NR_113708.1;16S_ribosomal_RNA|NR_116495.1	Bacteria	Proteobacteria	Betaproteobacteria	Burkholderiales	Comamonadaceae	Delftia	Delftia_MS
Dysosmobacter_welbionis_1	0	1.85036	FLT_LAR	16.2573	7.38872	3.01012	2.45463	0.0141029	0.060328	S	0	100	100	N		nt|CP034413.3;nt|LT558848.1	Bacteria	Firmicutes	Clostridia	Eubacteriales	Oscillospiraceae	Dysosmobacter	Dysosmobacter_welbionis
Eisenbergiella_1	8.53103	7.46995	GC_LAR	489.67	-0.143463	0.889216	-0.161336	0.871829	0.903017	G	0	100	100	N	Eisenbergiella	nt|MK287744.1	Bacteria	Firmicutes	Clostridia	Eubacteriales	Lachnospiraceae	Eisenbergiella	Eisenbergiella
Eisenbergiella_massiliensis_1	7.55275	7.26507	FLT_LAR	320.444	0.971936	0.821312	1.18339	0.236653	0.363637	S	0	100	100	N	Eisenbergiella_massiliensis	16S_ribosomal_RNA|NR_144731.1	Bacteria	Firmicutes	Clostridia	Eubacteriales	Lachnospiraceae	Eisenbergiella	Eisenbergiella_massiliensis
Enterobacteriaceae_MS_1	3.56147	4.03698	FLT_LAR	33.7772	2.10162	1.21953	1.72331	0.0848327	0.194344	S	7	100	100	N	Escherichia_coli;Escherichia_fergusonii;Escherichia_marmotae;Pseudescherichia_vulneris;Shigella_boydii;Shigella_flexneri;Shigella_sonnei	16S_ribosomal_RNA|NR_024570.1;16S_ribosomal_RNA|NR_026331.1;16S_ribosomal_RNA|NR_027549.1;16S_ribosomal_RNA|NR_104826.1;16S_ribosomal_RNA|NR_104901.1;16S_ribosomal_RNA|NR_119109.1;16S_ribosomal_RNA|NR_136472.1	Bacteria	Proteobacteria	Gammaproteobacteria	Enterobacterales	Enterobacteriaceae	Enterobacteriaceae_MS	Enterobacteriaceae_MS
Enterocloster_aldenensis_1	4.8629	5.81899	FLT_LAR	57.3644	1.55106	0.490456	3.16248	0.00156433	0.0115944	S	0	100	100	N	Enterocloster_aldenensis	16S_ribosomal_RNA|NR_043680.1	Bacteria	Firmicutes	Clostridia	Eubacteriales	Lachnospiraceae	Enterocloster	Enterocloster_aldenensis
Enterocloster_aldenensis_2	6.75046	7.52263	FLT_LAR	196.841	1.43886	0.502976	2.8607	0.0042271	0.0221923	S	0	100	100	N	Enterocloster_aldenensis	nt|LC515574.1	Bacteria	Firmicutes	Clostridia	Eubacteriales	Lachnospiraceae	Enterocloster	Enterocloster_aldenensis
Enterocloster_clostridioformis_1	4.7712	3.05617	GC_LAR	34.821	-1.68918	0.887893	-1.90246	0.0571108	0.15553	S	0	100	100	N	Enterocloster_clostridioformis	nt|CP050964.1	Bacteria	Firmicutes	Clostridia	Eubacteriales	Lachnospiraceae	Enterocloster	Enterocloster_clostridioformis
Enterocloster_MS_1	10.2047	10.5819	FLT_LAR	1505.11	0.512044	0.338031	1.51479	0.129826	0.244151	S	2	100	100	N	Enterocloster_bolteae;Enterocloster_clostridioformis	16S_ribosomal_RNA|NR_025567.1;16S_ribosomal_RNA|NR_118128.1	Bacteria	Firmicutes	Clostridia	Eubacteriales	Lachnospiraceae	Enterocloster	Enterocloster_MS
Enterocloster_MS_2	8.82181	8.14131	GC_LAR	407.775	-0.958374	0.393736	-2.43405	0.0149309	0.060328	S	2	100	100	N	Enterocloster_asparagiformis;Enterocloster_lavalensis	16S_ribosomal_RNA|NR_042200.1;16S_ribosomal_RNA|NR_044289.1	Bacteria	Firmicutes	Clostridia	Eubacteriales	Lachnospiraceae	Enterocloster	Enterocloster_MS
Enterococcus_MS_1	2.13786	0.510789	GC_LAR	1.80962	-1.3046	0.60141	-2.16924	0.0300642	0.108231	S	14	100	100	N	Enterococcus_canintestini;Enterococcus_canis;Enterococcus_dispar;Enterococcus_durans;Enterococcus_faecalis;Enterococcus_faecium;Enterococcus_hirae;Enterococcus_lactis;Enterococcus_mundtii;Enterococcus_olivae;Enterococcus_ratti;Enterococcus_rivorum;Enterococcus_saigonensis;Enterococcus_villorum	16S_ribosomal_RNA|NR_024904.1;16S_ribosomal_RNA|NR_024906.1;16S_ribosomal_RNA|NR_036921.1;16S_ribosomal_RNA|NR_036922.1;16S_ribosomal_RNA|NR_037082.1;16S_ribosomal_RNA|NR_040789.1;16S_ribosomal_RNA|NR_041933.1;16S_ribosomal_RNA|NR_042386.1;16S_ribosomal_RNA|NR_113903.1;16S_ribosomal_RNA|NR_113931.1;16S_ribosomal_RNA|NR_117043.1	Bacteria	Firmicutes	Bacilli	Lactobacillales	Enterococcaceae	Enterococcus	Enterococcus_MS
Erysipelatoclostridium_cocleatum_1	10.3384	11.1314	FLT_LAR	2139.75	0.743971	0.452638	1.64364	0.100252	0.208841	S	0	100	100	N	Erysipelatoclostridium_cocleatum	nt|AF028350.1	Bacteria	Firmicutes	Erysipelotrichia	Erysipelotrichales	Erysipelotrichaceae	Erysipelatoclostridium	Erysipelatoclostridium_cocleatum
Erysipelatoclostridium_innocuum_1	9.32914	8.6771	GC_LAR	638.836	-0.361592	0.546003	-0.662253	0.507809	0.646303	S	0	100	100	N	Erysipelatoclostridium_innocuum	nt|AB971793.1	Bacteria	Firmicutes	Erysipelotrichia	Erysipelotrichales	Erysipelotrichaceae	Erysipelatoclostridium	Erysipelatoclostridium_innocuum
Erysipelatoclostridium_saccharogumia_1	2.13465	2.79381	FLT_LAR	6.63987	0.647907	0.402084	1.61137	0.107098	0.217651	S	0	100	100	N	Erysipelatoclostridium_saccharogumia	16S_ribosomal_RNA|NR_043550.1	Bacteria	Firmicutes	Erysipelotrichia	Erysipelotrichales	Erysipelotrichaceae	Erysipelatoclostridium	Erysipelatoclostridium_saccharogumia
Extibacter_muris_1	1.15001	3.62106	FLT_LAR	29.8921	4.32322	1.14972	3.76022	0.000169765	0.00164541	S	0	100	100	N	Extibacter_muris	16S_ribosomal_RNA|NR_144610.1	Bacteria	Firmicutes	Clostridia	Eubacteriales	Lachnospiraceae	Extibacter	Extibacter_muris
Flavonifractor_plautii_1	8.60699	8.5334	FLT_LAR	517.485	0.493654	0.630669	0.782746	0.433776	0.594085	S	0	100	100	N	Flavonifractor_plautii	16S_ribosomal_RNA|NR_029356.1	Bacteria	Firmicutes	Clostridia	Eubacteriales	Oscillospiraceae	Flavonifractor	Flavonifractor_plautii
Hungatella_xylanolytica_1	6.15509	8.09093	FLT_LAR	1187.56	3.54588	1.14815	3.08834	0.00201275	0.0126803	S	0	100	100	N	Hungatella_xylanolytica	nt|OK626617.1	Bacteria	Firmicutes	Clostridia	Eubacteriales	Clostridiaceae	Hungatella	Hungatella_xylanolytica
Intestinimonas_butyriciproducens_1	6.52225	3.78784	GC_LAR	73.1257	-3.00477	0.828373	-3.62732	0.000286378	0.00257741	S	0	100	100	N	Intestinimonas_butyriciproducens	16S_ribosomal_RNA|NR_118554.1	Bacteria	Firmicutes	Clostridia	Eubacteriales	Eubacteriales	Intestinimonas	Intestinimonas_butyriciproducens
Lachnospiraceae_1	2.61665	3.51871	FLT_LAR	80.0959	4.59192	1.58595	2.89538	0.00378696	0.020746	F	0	100	100	N	Lachnospiraceae	nt|KX009913.1	Bacteria	Firmicutes	Clostridia	Eubacteriales	Lachnospiraceae	Lachnospiraceae	Lachnospiraceae
Lachnospiraceae_2	3.06493	1.0114	GC_LAR	10.4892	-2.20692	1.04913	-2.10357	0.0354162	0.117433	F	0	99.315	100	N	Lachnospiraceae	nt|KX009925.1	Bacteria	Firmicutes	Clostridia	Eubacteriales	Lachnospiraceae	Lachnospiraceae	Lachnospiraceae
Lachnospiraceae_3	0.165383	2.8192	FLT_LAR	27.4686	6.9278	1.73524	3.99242	6.54026e-05	0.000749157	F	0	100	100	N	Lachnospiraceae	nt|KX009926.1	Bacteria	Firmicutes	Clostridia	Eubacteriales	Lachnospiraceae	Lachnospiraceae	Lachnospiraceae
Lachnospiraceae_4	2.35634	4.4724	FLT_LAR	52.5646	1.97613	1.35091	1.46281	0.143519	0.260485	F	0	99.658	100	N	Lachnospiraceae	nt|MG702664.1	Bacteria	Firmicutes	Clostridia	Eubacteriales	Lachnospiraceae	Lachnospiraceae	Lachnospiraceae
Lachnospiraceae_5	9.3224	6.40271	GC_LAR	499.466	-3.18122	0.705117	-4.51162	6.43351e-06	0.000101328	F	0	100	100	N	Lachnospiraceae	nt|MZ130756.1	Bacteria	Firmicutes	Clostridia	Eubacteriales	Lachnospiraceae	Lachnospiraceae	Lachnospiraceae
Lachnospiraceae_6	3.44639	3.55846	FLT_LAR	16.6839	0.892048	0.638348	1.39743	0.162283	0.279163	F	0	99.315	100	N	Lachnospiraceae	nt|MZ130786.1	Bacteria	Firmicutes	Clostridia	Eubacteriales	Lachnospiraceae	Lachnospiraceae	Lachnospiraceae
Lachnospiraceae_7	12.1719	9.78805	GC_LAR	3804.61	-1.62355	0.781115	-2.0785	0.0376629	0.12168	F	0	100	100	N	Lachnospiraceae	nt|MZ130880.1	Bacteria	Firmicutes	Clostridia	Eubacteriales	Lachnospiraceae	Lachnospiraceae	Lachnospiraceae
Lactococcus_MS_1	7.06415	6.93757	GC_LAR	135.293	-0.124626	0.307098	-0.405817	0.684877	0.757477	S	3	100	100	N	Lactococcus_cremoris;Lactococcus_lactis;Lactococcus_taiwanensis	16S_ribosomal_RNA|NR_040954.1;16S_ribosomal_RNA|NR_040955.1;16S_ribosomal_RNA|NR_114327.1	Bacteria	Firmicutes	Bacilli	Lactobacillales	Streptococcaceae	Lactococcus	Lactococcus_MS
Ligilactobacillus_MS_1	9.39966	7.93733	GC_LAR	694.808	-2.08789	0.638958	-3.26764	0.00108447	0.00854023	S	4	100	100	N	Ligilactobacillus_animalis;Ligilactobacillus_apodemi;Ligilactobacillus_faecis;Ligilactobacillus_murinus	16S_ribosomal_RNA|NR_041610.1;16S_ribosomal_RNA|NR_042231.1;16S_ribosomal_RNA|NR_042367.1;16S_ribosomal_RNA|NR_114391.1	Bacteria	Firmicutes	Bacilli	Lactobacillales	Lactobacillaceae	Ligilactobacillus	Ligilactobacillus_MS
Marvinbryantia_1	1.46064	2.44789	FLT_LAR	8.98794	3.18874	1.05571	3.02046	0.00252392	0.0144552	G	0	100	100	N	Marvinbryantia	nt|MK287676.1	Bacteria	Firmicutes	Clostridia	Eubacteriales	Lachnospiraceae	Marvinbryantia	Marvinbryantia
Massilimicrobiota_1	3.36265	0.0552214	GC_LAR	30.3919	-8.1639	1.78766	-4.5668	4.95221e-06	8.91399e-05	G	0	100	100	N	Massilimicrobiota	nt|MT967515.1	Bacteria	Firmicutes	Erysipelotrichia	Erysipelotrichales	Erysipelotrichaceae	Massilimicrobiota	Massilimicrobiota
Mucispirillum_schaedleri_1	9.03662	9.75651	FLT_LAR	891.77	0.388992	0.54191	0.717816	0.47287	0.620642	S	0	100	100	N	Mucispirillum_schaedleri	16S_ribosomal_RNA|NR_042896.1	Bacteria	Deferribacteres	Deferribacteres	Deferribacterales	Deferribacteraceae	Mucispirillum	Mucispirillum_schaedleri
Oscillibacter_1	6.42079	6.03246	FLT_LAR	401.097	1.34649	1.27307	1.05767	0.290205	0.425185	G	0	100	100	N	Oscillibacter	nt|MT967828.1	Bacteria	Firmicutes	Clostridia	Eubacteriales	Oscillospiraceae	Oscillibacter	Oscillibacter
Oscillospiraceae_1	4.19156	3.68004	GC_LAR	17.0156	-0.581897	0.381857	-1.52386	0.127544	0.244151	F	0	99.315	100	N	Oscillospiraceae	nt|GU939203.1	Bacteria	Firmicutes	Clostridia	Eubacteriales	Oscillospiraceae	Oscillospiraceae	Oscillospiraceae
Oscillospiraceae_2	3.66121	0	GC_LAR	55.0545	-9.34585	1.83114	-5.10384	3.32822e-07	1.04839e-05	F	0	100	99.3127	N	Oscillospiraceae	nt|KP101892.1	Bacteria	Firmicutes	Clostridia	Eubacteriales	Oscillospiraceae	Oscillospiraceae	Oscillospiraceae
Parabacteroides_goldsteinii_1	14.9217	15.2165	FLT_LAR	36352.8	0.332326	0.209008	1.59001	0.111831	0.222023	S	0	100	100	N	Parabacteroides_goldsteinii	16S_ribosomal_RNA|NR_043317.1	Bacteria	Bacteroidetes	Bacteroidia	Bacteroidales	Tannerellaceae	Parabacteroides	Parabacteroides_goldsteinii
Providencia_MS_1	3.52987	4.26292	FLT_LAR	16.3974	1.06092	0.513447	2.06627	0.0388033	0.12223	S	5	100	100	N	Providencia_alcalifaciens;Providencia_rettgeri;Providencia_rustigianii;Providencia_sneebia;Providencia_vermicola	16S_ribosomal_RNA|NR_042411.1;16S_ribosomal_RNA|NR_042415.1;16S_ribosomal_RNA|NR_104913.1;16S_ribosomal_RNA|NR_115879.1;16S_ribosomal_RNA|NR_115880.1	Bacteria	Proteobacteria	Gammaproteobacteria	Enterobacterales	Morganellaceae	Providencia	Providencia_MS
Unknown_0	2.50389	3.72805	FLT_LAR	12.6691	0.746725	0.581437	1.28427	0.199046	0.317466	U	0	0	0	Y	Unknown	Unknown	Unknown	Unknown	Unknown	Unknown	Unknown	Unknown	Unknown
Unknown_1	7.03852	6.7195	GC_LAR	198.231	-0.641646	0.760347	-0.843886	0.398733	0.552092	U	0	0	0	N	Unknown	Unknown	Unknown	Unknown	Unknown	Unknown	Unknown	Unknown	Unknown
Unknown_10	7.40384	7.2153	GC_LAR	166.923	-0.287903	0.294239	-0.978468	0.327843	0.469411	U	0	0	0	N	Unknown	Unknown	Unknown	Unknown	Unknown	Unknown	Unknown	Unknown	Unknown
Unknown_100	5.57573	5.39904	FLT_LAR	64.7844	0.264698	0.653266	0.405192	0.685336	0.757477	U	0	0	0	N	Unknown	Unknown	Unknown	Unknown	Unknown	Unknown	Unknown	Unknown	Unknown
Unknown_101	1.06147	8.24234	FLT_LAR	1055.86	12.9973	1.36927	9.49213	2.26368e-21	2.85224e-19	U	0	0	0	N	Unknown	Unknown	Unknown	Unknown	Unknown	Unknown	Unknown	Unknown	Unknown
Unknown_102	3.63633	3.72928	FLT_LAR	13.9572	0.207724	0.355739	0.583922	0.559273	0.682419	U	0	0	0	N	Unknown	Unknown	Unknown	Unknown	Unknown	Unknown	Unknown	Unknown	Unknown
Unknown_103	4.16728	4.25928	FLT_LAR	19.7694	0.171705	0.319895	0.536755	0.591437	0.703029	U	0	0	0	N	Unknown	Unknown	Unknown	Unknown	Unknown	Unknown	Unknown	Unknown	Unknown
Unknown_104	6.61054	6.00573	GC_LAR	131.194	-1.05864	0.811244	-1.30495	0.191909	0.310007	U	0	0	0	N	Unknown	Unknown	Unknown	Unknown	Unknown	Unknown	Unknown	Unknown	Unknown
Unknown_105	5.93004	8.5673	FLT_LAR	354.96	1.39219	1.03592	1.34392	0.178975	0.300679	U	0	0	0	N	Unknown	Unknown	Unknown	Unknown	Unknown	Unknown	Unknown	Unknown	Unknown
Unknown_108	5.05546	0.170761	GC_LAR	583.801	-12.216	2.98667	-4.09017	4.31059e-05	0.000543135	U	0	0	0	N	Unknown	Unknown	Unknown	Unknown	Unknown	Unknown	Unknown	Unknown	Unknown
Unknown_11	4.19116	0.796395	GC_LAR	14.2142	-4.06778	0.765073	-5.31685	1.05578e-07	4.43429e-06	U	0	0	0	N	Unknown	Unknown	Unknown	Unknown	Unknown	Unknown	Unknown	Unknown	Unknown
Unknown_110	4.69456	3.10239	GC_LAR	35.5432	-1.72053	0.949638	-1.81177	0.0700215	0.179338	U	0	0	0	N	Unknown	Unknown	Unknown	Unknown	Unknown	Unknown	Unknown	Unknown	Unknown
Unknown_113	3.57202	5.97213	FLT_LAR	102.15	3.53394	0.901268	3.92108	8.81548e-05	0.000925625	U	0	0	0	N	Unknown	Unknown	Unknown	Unknown	Unknown	Unknown	Unknown	Unknown	Unknown
Unknown_115	0.634789	3.37908	FLT_LAR	13.9774	2.343	1.34045	1.74792	0.0804784	0.187783	U	0	0	0	N	Unknown	Unknown	Unknown	Unknown	Unknown	Unknown	Unknown	Unknown	Unknown
Unknown_12	3.35805	3.14183	GC_LAR	10.3174	-0.221614	0.354488	-0.625166	0.531862	0.660979	U	0	0	0	N	Unknown	Unknown	Unknown	Unknown	Unknown	Unknown	Unknown	Unknown	Unknown
Unknown_14	3.78035	2.39694	GC_LAR	21.8097	-2.73607	0.873198	-3.13339	0.001728	0.012096	U	0	0	0	N	Unknown	Unknown	Unknown	Unknown	Unknown	Unknown	Unknown	Unknown	Unknown
Unknown_19	4.93525	5.39479	FLT_LAR	53.5694	1.10554	0.621331	1.7793	0.0751903	0.182137	U	0	0	0	N	Unknown	Unknown	Unknown	Unknown	Unknown	Unknown	Unknown	Unknown	Unknown
Unknown_2	3.9321	5.22837	FLT_LAR	40.3579	1.49789	0.645056	2.32211	0.020227	0.0772302	U	0	0	0	N	Unknown	Unknown	Unknown	Unknown	Unknown	Unknown	Unknown	Unknown	Unknown
Unknown_20	4.9371	3.55597	GC_LAR	31.4239	-0.960104	0.782137	-1.22754	0.21962	0.341631	U	0	0	0	Y	Unknown	Unknown	Unknown	Unknown	Unknown	Unknown	Unknown	Unknown	Unknown
Unknown_21	3.01136	3.4816	FLT_LAR	10.9469	0.625178	0.394223	1.58585	0.112774	0.222023	U	0	0	0	N	Unknown	Unknown	Unknown	Unknown	Unknown	Unknown	Unknown	Unknown	Unknown
Unknown_22	3.59642	3.72506	FLT_LAR	17.9228	0.609028	0.619464	0.983153	0.325532	0.469411	U	0	0	0	N	Unknown	Unknown	Unknown	Unknown	Unknown	Unknown	Unknown	Unknown	Unknown
Unknown_23	3.92373	4.37599	FLT_LAR	23.4407	0.203528	0.540582	0.376499	0.706546	0.774129	U	0	0	0	N	Unknown	Unknown	Unknown	Unknown	Unknown	Unknown	Unknown	Unknown	Unknown
Unknown_25	5.22889	5.50407	FLT_LAR	43.5168	0.368908	0.251945	1.46424	0.143129	0.260485	U	0	0	0	N	Unknown	Unknown	Unknown	Unknown	Unknown	Unknown	Unknown	Unknown	Unknown
Unknown_26	5.53387	4.81546	GC_LAR	43.7036	-1.00245	0.467773	-2.14302	0.0321117	0.112391	U	0	0	0	N	Unknown	Unknown	Unknown	Unknown	Unknown	Unknown	Unknown	Unknown	Unknown
Unknown_27	3.73629	3.33337	FLT_LAR	14.1609	0.0826869	0.498853	0.165754	0.868351	0.903017	U	0	0	0	Y	Unknown	Unknown	Unknown	Unknown	Unknown	Unknown	Unknown	Unknown	Unknown
Unknown_28	2.4433	1.57146	GC_LAR	6.32121	-0.359916	0.780468	-0.461153	0.644689	0.731809	U	0	0	0	N	Unknown	Unknown	Unknown	Unknown	Unknown	Unknown	Unknown	Unknown	Unknown
Unknown_3	4.92801	2.17616	GC_LAR	24.9307	-3.07144	0.709283	-4.33034	1.48882e-05	0.000208435	U	0	0	0	N	Unknown	Unknown	Unknown	Unknown	Unknown	Unknown	Unknown	Unknown	Unknown
Unknown_30	3.38689	0.98031	GC_LAR	8.96331	-2.65626	0.856332	-3.1019	0.00192281	0.0126803	U	0	0	0	N	Unknown	Unknown	Unknown	Unknown	Unknown	Unknown	Unknown	Unknown	Unknown
Unknown_32	4.04658	3.39328	GC_LAR	15.8581	-0.326016	0.502943	-0.648217	0.516844	0.651224	U	0	0	0	N	Unknown	Unknown	Unknown	Unknown	Unknown	Unknown	Unknown	Unknown	Unknown
Unknown_33	5.00393	3.92711	GC_LAR	35.3103	-1.71247	0.648073	-2.6424	0.00823217	0.0392859	U	0	0	0	N	Unknown	Unknown	Unknown	Unknown	Unknown	Unknown	Unknown	Unknown	Unknown
Unknown_34	5.93274	5.98579	FLT_LAR	77.5795	0.0231086	0.522664	0.044213	0.964735	0.978733	U	0	0	0	N	Unknown	Unknown	Unknown	Unknown	Unknown	Unknown	Unknown	Unknown	Unknown
Unknown_35	5.57628	6.0918	FLT_LAR	69.4493	0.654685	0.450442	1.45343	0.146105	0.260485	U	0	0	0	N	Unknown	Unknown	Unknown	Unknown	Unknown	Unknown	Unknown	Unknown	Unknown
Unknown_38	4.74577	3.25575	GC_LAR	22.1276	-1.11382	0.617275	-1.80442	0.071166	0.179338	U	0	0	0	Y	Unknown	Unknown	Unknown	Unknown	Unknown	Unknown	Unknown	Unknown	Unknown
Unknown_39	3.51605	4.28895	FLT_LAR	18.2966	0.852852	0.401106	2.12625	0.0334826	0.114022	U	0	0	0	N	Unknown	Unknown	Unknown	Unknown	Unknown	Unknown	Unknown	Unknown	Unknown
Unknown_40	2.93264	3.68771	FLT_LAR	12.1333	0.927877	0.418599	2.21662	0.0266488	0.0987572	U	0	0	0	Y	Unknown	Unknown	Unknown	Unknown	Unknown	Unknown	Unknown	Unknown	Unknown
Unknown_41	4.11085	2.27306	GC_LAR	18.6331	-0.539023	0.984447	-0.547539	0.584008	0.70081	U	0	0	0	N	Unknown	Unknown	Unknown	Unknown	Unknown	Unknown	Unknown	Unknown	Unknown
Unknown_42	5.72605	4.20685	GC_LAR	46.2307	-1.24359	0.676034	-1.83955	0.065835	0.172817	U	0	0	0	N	Unknown	Unknown	Unknown	Unknown	Unknown	Unknown	Unknown	Unknown	Unknown
Unknown_44	2.83871	1.48546	GC_LAR	6.2423	-1.48555	0.612675	-2.42469	0.0153214	0.060328	U	0	0	0	Y	Unknown	Unknown	Unknown	Unknown	Unknown	Unknown	Unknown	Unknown	Unknown
Unknown_46	4.16234	3.89009	GC_LAR	19.4403	-0.539461	0.481756	-1.11978	0.262807	0.39896	U	0	0	0	Y	Unknown	Unknown	Unknown	Unknown	Unknown	Unknown	Unknown	Unknown	Unknown
Unknown_47	5.25176	5.62789	FLT_LAR	79.5292	1.08866	0.750283	1.451	0.146781	0.260485	U	0	0	0	N	Unknown	Unknown	Unknown	Unknown	Unknown	Unknown	Unknown	Unknown	Unknown
Unknown_48	5.27826	6.20031	FLT_LAR	70.3132	0.932548	0.477471	1.9531	0.0508081	0.145455	U	0	0	0	N	Unknown	Unknown	Unknown	Unknown	Unknown	Unknown	Unknown	Unknown	Unknown
Unknown_49	3.90165	3.9166	FLT_LAR	16.3902	0.118354	0.365591	0.323734	0.746139	0.810462	U	0	0	0	N	Unknown	Unknown	Unknown	Unknown	Unknown	Unknown	Unknown	Unknown	Unknown
Unknown_5	7.2827	5.71191	GC_LAR	136.844	-1.19878	0.73118	-1.63952	0.101106	0.208841	U	0	0	0	Y	Unknown	Unknown	Unknown	Unknown	Unknown	Unknown	Unknown	Unknown	Unknown
Unknown_50	2.65423	3.33183	FLT_LAR	12.349	1.21791	0.642498	1.89558	0.0580152	0.15553	U	0	0	0	N	Unknown	Unknown	Unknown	Unknown	Unknown	Unknown	Unknown	Unknown	Unknown
Unknown_51	2.23256	3.91992	FLT_LAR	54.8177	3.89541	1.18729	3.28092	0.00103468	0.00854023	U	0	0	0	N	Unknown	Unknown	Unknown	Unknown	Unknown	Unknown	Unknown	Unknown	Unknown
Unknown_52	3.45774	2.52999	GC_LAR	11.0071	-0.601003	0.649461	-0.925387	0.354765	0.499143	U	0	0	0	N	Unknown	Unknown	Unknown	Unknown	Unknown	Unknown	Unknown	Unknown	Unknown
Unknown_53	3.60062	4.58528	FLT_LAR	25.003	1.17087	0.57329	2.04237	0.041115	0.126354	U	0	0	0	N	Unknown	Unknown	Unknown	Unknown	Unknown	Unknown	Unknown	Unknown	Unknown
Unknown_56	4.06692	2.10829	GC_LAR	15.7931	-1.9729	0.799025	-2.46913	0.0135443	0.060328	U	0	0	0	Y	Unknown	Unknown	Unknown	Unknown	Unknown	Unknown	Unknown	Unknown	Unknown
Unknown_57	3.2757	1.34932	GC_LAR	8.88585	-1.42014	0.865852	-1.64016	0.100971	0.208841	U	0	0	0	N	Unknown	Unknown	Unknown	Unknown	Unknown	Unknown	Unknown	Unknown	Unknown
Unknown_58	5.06964	3.30505	GC_LAR	27.728	-1.35489	0.697116	-1.94356	0.0519483	0.145455	U	0	0	0	Y	Unknown	Unknown	Unknown	Unknown	Unknown	Unknown	Unknown	Unknown	Unknown
Unknown_6	3.75862	4.2731	FLT_LAR	19.9216	0.653713	0.468938	1.39403	0.163309	0.279163	U	0	0	0	N	Unknown	Unknown	Unknown	Unknown	Unknown	Unknown	Unknown	Unknown	Unknown
Unknown_62	2.7106	2.26314	FLT_LAR	9.13472	0.00782773	0.811284	0.00964857	0.992302	0.992302	U	0	0	0	N	Unknown	Unknown	Unknown	Unknown	Unknown	Unknown	Unknown	Unknown	Unknown
Unknown_63	4.90506	3.53481	GC_LAR	28.3364	-0.946241	0.719641	-1.31488	0.188551	0.309884	U	0	0	0	N	Unknown	Unknown	Unknown	Unknown	Unknown	Unknown	Unknown	Unknown	Unknown
Unknown_65	2.38755	0	GC_LAR	16.7823	-7.30842	2.73551	-2.67168	0.00754722	0.038038	U	0	0	0	N	Unknown	Unknown	Unknown	Unknown	Unknown	Unknown	Unknown	Unknown	Unknown
Unknown_67	3.64768	3.0413	GC_LAR	12.1815	-0.200143	0.482252	-0.415017	0.678129	0.757477	U	0	0	0	Y	Unknown	Unknown	Unknown	Unknown	Unknown	Unknown	Unknown	Unknown	Unknown
Unknown_68	5.63773	3.62705	GC_LAR	40.0293	-2.01439	0.657361	-3.06436	0.00218134	0.013088	U	0	0	0	N	Unknown	Unknown	Unknown	Unknown	Unknown	Unknown	Unknown	Unknown	Unknown
Unknown_69	1.96315	3.97065	FLT_LAR	12.3233	2.11577	0.431321	4.90532	9.32728e-07	2.35047e-05	U	0	0	0	N	Unknown	Unknown	Unknown	Unknown	Unknown	Unknown	Unknown	Unknown	Unknown
Unknown_70	4.04664	4.08569	FLT_LAR	18.2566	0.175646	0.361018	0.486531	0.626591	0.729601	U	0	0	0	N	Unknown	Unknown	Unknown	Unknown	Unknown	Unknown	Unknown	Unknown	Unknown
Unknown_72	5.05713	5.12852	FLT_LAR	40.3089	0.0735037	0.464813	0.158136	0.874349	0.903017	U	0	0	0	N	Unknown	Unknown	Unknown	Unknown	Unknown	Unknown	Unknown	Unknown	Unknown
Unknown_74	4.07078	4.37493	FLT_LAR	26.2902	0.773595	0.589435	1.31243	0.189374	0.309884	U	0	0	0	N	Unknown	Unknown	Unknown	Unknown	Unknown	Unknown	Unknown	Unknown	Unknown
Unknown_75	3.95396	3.28681	FLT_LAR	23.7279	0.168265	0.901435	0.186663	0.851925	0.902038	U	0	0	0	Y	Unknown	Unknown	Unknown	Unknown	Unknown	Unknown	Unknown	Unknown	Unknown
Unknown_76	3.61776	4.04082	FLT_LAR	16.9751	0.499075	0.449382	1.11058	0.266749	0.400123	U	0	0	0	N	Unknown	Unknown	Unknown	Unknown	Unknown	Unknown	Unknown	Unknown	Unknown
Unknown_77	4.6262	5.44452	FLT_LAR	42.7988	0.837651	0.497129	1.68498	0.0919929	0.203353	U	0	0	0	N	Unknown	Unknown	Unknown	Unknown	Unknown	Unknown	Unknown	Unknown	Unknown
Unknown_78	2.44704	3.17416	FLT_LAR	9.38564	0.806495	0.530754	1.51953	0.12863	0.244151	U	0	0	0	Y	Unknown	Unknown	Unknown	Unknown	Unknown	Unknown	Unknown	Unknown	Unknown
Unknown_79	2.57623	4.81017	FLT_LAR	23.7904	1.6433	0.675302	2.43342	0.0149568	0.060328	U	0	0	0	Y	Unknown	Unknown	Unknown	Unknown	Unknown	Unknown	Unknown	Unknown	Unknown
Unknown_8	3.61601	3.70699	FLT_LAR	19.8177	0.875747	0.688947	1.27114	0.20368	0.320796	U	0	0	0	N	Unknown	Unknown	Unknown	Unknown	Unknown	Unknown	Unknown	Unknown	Unknown
Unknown_81	4.2083	4.25108	FLT_LAR	28.8205	0.432524	0.697312	0.620273	0.535078	0.660979	U	0	0	0	N	Unknown	Unknown	Unknown	Unknown	Unknown	Unknown	Unknown	Unknown	Unknown
Unknown_82	4.77975	6.76807	FLT_LAR	300.9	3.06043	1.16154	2.63481	0.00841841	0.0392859	U	0	0	0	N	Unknown	Unknown	Unknown	Unknown	Unknown	Unknown	Unknown	Unknown	Unknown
Unknown_85	4.03013	2.80433	GC_LAR	13.7568	-0.977584	0.544664	-1.79484	0.0726796	0.179561	U	0	0	0	N	Unknown	Unknown	Unknown	Unknown	Unknown	Unknown	Unknown	Unknown	Unknown
Unknown_86	8.45079	6.79822	GC_LAR	381.951	-0.640912	0.932414	-0.687368	0.491851	0.634001	U	0	0	0	N	Unknown	Unknown	Unknown	Unknown	Unknown	Unknown	Unknown	Unknown	Unknown
Unknown_89	9.78276	9.78133	FLT_LAR	1283.79	0.493283	0.652053	0.756507	0.449345	0.602314	U	0	0	0	N	Unknown	Unknown	Unknown	Unknown	Unknown	Unknown	Unknown	Unknown	Unknown
Unknown_9	2.595	3.35187	FLT_LAR	9.74486	0.78295	0.442174	1.77068	0.0766133	0.182137	U	0	0	0	N	Unknown	Unknown	Unknown	Unknown	Unknown	Unknown	Unknown	Unknown	Unknown

## Sheet: DA_analysis_ISS
ESV	GC_ISS_rlog	FLT_ISS_rlog	Regulation	baseMean	log2FoldChange	lfcSE	stat	pvalue	padj	lowestTaxLevel	NumberOfAmbiguousHits	identity	coverageQ	chimera	AmbiguousLabels	subjectid	Domain	Phylum	Class	Order	Family	Genus	Species
Dysosmobacter_welbionis_1	0.145953	4.62562	FLT_ISS	16.9663	6.98671	0.82161	8.50369	1.83663e-17	2.27742e-15	S	0	100	100	N		nt|CP034413.3;nt|LT558848.1	Bacteria	Firmicutes	Clostridia	Eubacteriales	Oscillospiraceae	Dysosmobacter	Dysosmobacter_welbionis
Extibacter_muris_1	0.0267355	3.00652	FLT_ISS	9.94235	6.53493	1.04013	6.28278	3.32579e-10	2.06199e-08	S	0	100	100	N	Extibacter_muris	16S_ribosomal_RNA|NR_144610.1	Bacteria	Firmicutes	Clostridia	Eubacteriales	Lachnospiraceae	Extibacter	Extibacter_muris
Guopingia_tenuis_1	0	2.45393	FLT_ISS	5.48853	6.01147	1.04939	5.72853	1.01303e-08	4.1872e-07	F	0	100	100	N	Guopingia_tenuis	refSeq|NZ_JACRSS010000008.1	Bacteria	Firmicutes	Clostridia	Eubacteriales	Christensenellaceae	Guopingia	Guopingia_tenuis
Acetatifactor_1	4.92432	1.02087	GC_ISS	525.512	-10.2212	1.84155	-5.55036	2.85084e-08	8.54506e-07	G	0	100	100	N	Acetatifactor	nt|MK287750.1	Bacteria	Firmicutes	Clostridia	Eubacteriales	Lachnospiraceae	Acetatifactor	Acetatifactor
Enterocloster_clostridioformis_1	2.5357	4.90113	FLT_ISS	48.0707	4.26497	0.773039	5.51714	3.44559e-08	8.54506e-07	S	0	100	100	N	Enterocloster_clostridioformis	nt|CP050964.1	Bacteria	Firmicutes	Clostridia	Eubacteriales	Lachnospiraceae	Enterocloster	Enterocloster_clostridioformis
Eisenbergiella_massiliensis_1	6.34465	7.96669	FLT_ISS	201.781	1.96816	0.525849	3.74282	0.000181969	0.00339773	S	0	100	100	N	Eisenbergiella_massiliensis	16S_ribosomal_RNA|NR_144731.1	Bacteria	Firmicutes	Clostridia	Eubacteriales	Lachnospiraceae	Eisenbergiella	Eisenbergiella_massiliensis
Romboutsia_timonensis_1	0.137396	2.39516	FLT_ISS	10.1715	5.91186	1.58513	3.72957	0.000191807	0.00339773	S	0	100	100	N	Romboutsia_timonensis	16S_ribosomal_RNA|NR_144740.1	Bacteria	Firmicutes	Clostridia	Eubacteriales	Peptostreptococcaceae	Romboutsia	Romboutsia_timonensis
Unknown_82	8.23665	6.38876	GC_ISS	261.951	-2.05943	0.56432	-3.6494	0.000262855	0.00407425	U	0	0	0	N	Unknown	Unknown	Unknown	Unknown	Unknown	Unknown	Unknown	Unknown	Unknown
Clostridium_2	9.98468	9.09311	GC_ISS	901.806	-1.21597	0.360751	-3.37066	0.000749893	0.0103319	G	0	99.315	100	N	Clostridium	nt|AB622837.1	Bacteria	Firmicutes	Clostridia	Eubacteriales	Clostridiaceae	Clostridium	Clostridium
Romboutsia_ilealis_1	0.109569	2.41488	FLT_ISS	14.7691	6.45502	1.95347	3.30438	0.000951862	0.0118031	S	0	100	100	N	Romboutsia_ilealis	nt|LN555523.1	Bacteria	Firmicutes	Clostridia	Eubacteriales	Peptostreptococcaceae	Romboutsia	Romboutsia_ilealis
Unknown_8	5.07372	3.98958	GC_ISS	31.5463	-1.47483	0.464056	-3.17813	0.00148226	0.0167091	U	0	0	0	N	Unknown	Unknown	Unknown	Unknown	Unknown	Unknown	Unknown	Unknown	Unknown
Hungatella_xylanolytica_1	8.47578	6.00625	GC_ISS	481.598	-2.54996	0.854685	-2.9835	0.00284968	0.0294467	S	0	100	100	N	Hungatella_xylanolytica	nt|OK626617.1	Bacteria	Firmicutes	Clostridia	Eubacteriales	Clostridiaceae	Hungatella	Hungatella_xylanolytica
Anaerotignum_2	6.5339	4.96321	GC_ISS	105.037	-1.93204	0.675586	-2.8598	0.00423909	0.0350432	G	0	100	100	N	Anaerotignum	nt|MK287763.1	Bacteria	Firmicutes	Clostridia	Eubacteriales	Lachnospiraceae	Anaerotignum	Anaerotignum
Lachnospiraceae_6	4.84251	3.85585	GC_ISS	26.7034	-1.29107	0.449681	-2.87108	0.00409069	0.0350432	F	0	99.315	100	N	Lachnospiraceae	nt|MZ130786.1	Bacteria	Firmicutes	Clostridia	Eubacteriales	Lachnospiraceae	Lachnospiraceae	Lachnospiraceae
Unknown_51	3.52542	1.02682	GC_ISS	18.4049	-2.91397	1.0115	-2.88085	0.0039661	0.0350432	U	0	0	0	N	Unknown	Unknown	Unknown	Unknown	Unknown	Unknown	Unknown	Unknown	Unknown
Unknown_39	3.34673	2.25009	GC_ISS	10.6362	-1.56915	0.56595	-2.7726	0.00556099	0.0430977	U	0	0	0	N	Unknown	Unknown	Unknown	Unknown	Unknown	Unknown	Unknown	Unknown	Unknown
Unknown_38	4.54003	5.40989	FLT_ISS	36.985	1.11901	0.432803	2.58549	0.00972394	0.0709276	U	0	0	0	Y	Unknown	Unknown	Unknown	Unknown	Unknown	Unknown	Unknown	Unknown	Unknown
Unknown_101	0.465277	3.79999	FLT_ISS	129.821	7.19129	2.92991	2.45444	0.0141102	0.0972039	U	0	0	0	N	Unknown	Unknown	Unknown	Unknown	Unknown	Unknown	Unknown	Unknown	Unknown
Oscillibacter_1	6.86186	6.09122	GC_ISS	251.907	-2.184	0.904734	-2.41397	0.0157798	0.102984	G	0	100	100	N	Oscillibacter	nt|MT967828.1	Bacteria	Firmicutes	Clostridia	Eubacteriales	Oscillospiraceae	Oscillibacter	Oscillibacter
Enterococcus_MS_1	2.4969	1.52726	GC_ISS	9.87219	-2.07808	0.874545	-2.37618	0.017493	0.108456	S	14	100	100	N	Enterococcus_canintestini;Enterococcus_canis;Enterococcus_dispar;Enterococcus_durans;Enterococcus_faecalis;Enterococcus_faecium;Enterococcus_hirae;Enterococcus_lactis;Enterococcus_mundtii;Enterococcus_olivae;Enterococcus_ratti;Enterococcus_rivorum;Enterococcus_saigonensis;Enterococcus_villorum	16S_ribosomal_RNA|NR_024904.1;16S_ribosomal_RNA|NR_024906.1;16S_ribosomal_RNA|NR_036921.1;16S_ribosomal_RNA|NR_036922.1;16S_ribosomal_RNA|NR_037082.1;16S_ribosomal_RNA|NR_040789.1;16S_ribosomal_RNA|NR_041933.1;16S_ribosomal_RNA|NR_042386.1;16S_ribosomal_RNA|NR_113903.1;16S_ribosomal_RNA|NR_113931.1;16S_ribosomal_RNA|NR_117043.1	Bacteria	Firmicutes	Bacilli	Lactobacillales	Enterococcaceae	Enterococcus	Enterococcus_MS
Enterobacteriaceae_MS_1	3.24856	1.03651	GC_ISS	10.5838	-2.34432	1.01427	-2.31134	0.020814	0.122902	S	7	100	100	N	Escherichia_coli;Escherichia_fergusonii;Escherichia_marmotae;Pseudescherichia_vulneris;Shigella_boydii;Shigella_flexneri;Shigella_sonnei	16S_ribosomal_RNA|NR_024570.1;16S_ribosomal_RNA|NR_026331.1;16S_ribosomal_RNA|NR_027549.1;16S_ribosomal_RNA|NR_104826.1;16S_ribosomal_RNA|NR_104901.1;16S_ribosomal_RNA|NR_119109.1;16S_ribosomal_RNA|NR_136472.1	Bacteria	Proteobacteria	Gammaproteobacteria	Enterobacterales	Enterobacteriaceae	Enterobacteriaceae_MS	Enterobacteriaceae_MS
Clostridium_1	4.0996	1.39465	GC_ISS	193.09	-5.67395	2.47491	-2.29259	0.0218719	0.123278	G	0	99.315	100	N	Clostridium	nt|AB622825.1	Bacteria	Firmicutes	Clostridia	Eubacteriales	Clostridiaceae	Clostridium	Clostridium
Unknown_48	5.45235	4.60577	GC_ISS	47.2929	-1.24576	0.548989	-2.2692	0.0232564	0.125382	U	0	0	0	N	Unknown	Unknown	Unknown	Unknown	Unknown	Unknown	Unknown	Unknown	Unknown
Marvinbryantia_1	3.44387	7.38448	FLT_ISS	150.73	2.43798	1.08787	2.24107	0.0250214	0.129277	G	0	100	100	N	Marvinbryantia	nt|MK287676.1	Bacteria	Firmicutes	Clostridia	Eubacteriales	Lachnospiraceae	Marvinbryantia	Marvinbryantia
Oscillospiraceae_1	4.30036	5.27421	FLT_ISS	32.2604	0.960402	0.432742	2.21934	0.0264634	0.131258	F	0	99.315	100	N	Oscillospiraceae	nt|GU939203.1	Bacteria	Firmicutes	Clostridia	Eubacteriales	Oscillospiraceae	Oscillospiraceae	Oscillospiraceae
Erysipelatoclostridium_cocleatum_1	10.8176	10.1354	GC_ISS	2018.71	-1.15658	0.529453	-2.18449	0.0289264	0.137957	S	0	100	100	N	Erysipelatoclostridium_cocleatum	nt|AF028350.1	Bacteria	Firmicutes	Erysipelotrichia	Erysipelotrichales	Erysipelotrichaceae	Erysipelatoclostridium	Erysipelatoclostridium_cocleatum
Enterocloster_aldenensis_2	8.41368	7.87159	GC_ISS	327.655	-0.827296	0.387258	-2.13629	0.0326556	0.149974	S	0	100	100	N	Enterocloster_aldenensis	nt|LC515574.1	Bacteria	Firmicutes	Clostridia	Eubacteriales	Lachnospiraceae	Enterocloster	Enterocloster_aldenensis
Ligilactobacillus_MS_1	9.60553	10.2696	FLT_ISS	1085.42	0.806828	0.385088	2.09518	0.036155	0.160115	S	4	100	100	N	Ligilactobacillus_animalis;Ligilactobacillus_apodemi;Ligilactobacillus_faecis;Ligilactobacillus_murinus	16S_ribosomal_RNA|NR_041610.1;16S_ribosomal_RNA|NR_042231.1;16S_ribosomal_RNA|NR_042367.1;16S_ribosomal_RNA|NR_114391.1	Bacteria	Firmicutes	Bacilli	Lactobacillales	Lactobacillaceae	Ligilactobacillus	Ligilactobacillus_MS
Enterocloster_aldenensis_1	6.57455	6.07084	GC_ISS	95.5158	-0.850305	0.423666	-2.00702	0.0447477	0.191335	S	0	100	100	N	Enterocloster_aldenensis	16S_ribosomal_RNA|NR_043680.1	Bacteria	Firmicutes	Clostridia	Eubacteriales	Lachnospiraceae	Enterocloster	Enterocloster_aldenensis
Mammaliicoccus_MS_1	0.434989	0	GC_ISS	1.47592	-2.55266	1.32892	-1.92085	0.0547504	0.219002	S	2	100	100	N	Mammaliicoccus_fleurettii;Mammaliicoccus_lentus	16S_ribosomal_RNA|NR_041326.1;16S_ribosomal_RNA|NR_043418.1	Bacteria	Firmicutes	Bacilli	Bacillales	Staphylococcaceae	Mammaliicoccus	Mammaliicoccus_MS
Unknown_0	1.88762	1.5404	GC_ISS	6.51404	-1.61454	0.83528	-1.93293	0.0532442	0.219002	U	0	0	0	Y	Unknown	Unknown	Unknown	Unknown	Unknown	Unknown	Unknown	Unknown	Unknown
Unknown_100	6.43105	5.78523	GC_ISS	104.266	-1.11866	0.608078	-1.83966	0.0658177	0.247315	U	0	0	0	N	Unknown	Unknown	Unknown	Unknown	Unknown	Unknown	Unknown	Unknown	Unknown
Unknown_58	4.73405	5.54554	FLT_ISS	42.4251	0.885365	0.47959	1.84609	0.0648793	0.247315	U	0	0	0	Y	Unknown	Unknown	Unknown	Unknown	Unknown	Unknown	Unknown	Unknown	Unknown
Clostridiaceae_1	10.1623	11.0357	FLT_ISS	1840.35	0.830979	0.465616	1.78469	0.0743122	0.263278	F	0	100	100	N	Clostridiaceae	nt|EU728744.1	Bacteria	Firmicutes	Clostridia	Eubacteriales	Clostridiaceae	Clostridiaceae	Clostridiaceae
Lachnospiraceae_5	5.91576	7.51038	FLT_ISS	494.224	2.21779	1.23868	1.79045	0.0733815	0.263278	F	0	100	100	N	Lachnospiraceae	nt|MZ130756.1	Bacteria	Firmicutes	Clostridia	Eubacteriales	Lachnospiraceae	Lachnospiraceae	Lachnospiraceae
Lachnospiraceae_2	3.13543	1.79439	GC_ISS	7.79258	-1.32231	0.776406	-1.70312	0.0885453	0.299526	F	0	99.315	100	N	Lachnospiraceae	nt|KX009925.1	Bacteria	Firmicutes	Clostridia	Eubacteriales	Lachnospiraceae	Lachnospiraceae	Lachnospiraceae
Unknown_40	2.98405	3.83001	FLT_ISS	13.8216	0.92938	0.547111	1.69871	0.0893746	0.299526	U	0	0	0	Y	Unknown	Unknown	Unknown	Unknown	Unknown	Unknown	Unknown	Unknown	Unknown
Blautia_MS_1	7.80811	8.6039	FLT_ISS	371.27	0.876064	0.540074	1.62212	0.104778	0.341907	S	3	100	100	N	Blautia_hansenii;Blautia_hominis;Blautia_marasmi	16S_ribosomal_RNA|NR_104687.1;16S_ribosomal_RNA|NR_147395.1;16S_ribosomal_RNA|NR_163634.1	Bacteria	Firmicutes	Clostridia	Eubacteriales	Lachnospiraceae	Blautia	Blautia_MS
Unknown_33	4.90588	5.57406	FLT_ISS	43.0164	0.68741	0.43354	1.58558	0.112835	0.358759	U	0	0	0	N	Unknown	Unknown	Unknown	Unknown	Unknown	Unknown	Unknown	Unknown	Unknown
Unknown_63	4.12208	4.62265	FLT_ISS	22.616	0.563592	0.384364	1.4663	0.142567	0.441957	U	0	0	0	N	Unknown	Unknown	Unknown	Unknown	Unknown	Unknown	Unknown	Unknown	Unknown
Erysipelatoclostridium_saccharogumia_1	2.84239	1.97467	GC_ISS	8.17594	-0.900403	0.662463	-1.35917	0.174091	0.503475	S	0	100	100	N	Erysipelatoclostridium_saccharogumia	16S_ribosomal_RNA|NR_043550.1	Bacteria	Firmicutes	Erysipelotrichia	Erysipelotrichales	Erysipelotrichaceae	Erysipelatoclostridium	Erysipelatoclostridium_saccharogumia
Unknown_79	3.29904	2.88956	GC_ISS	13.8526	-0.920047	0.67754	-1.35792	0.174488	0.503475	U	0	0	0	Y	Unknown	Unknown	Unknown	Unknown	Unknown	Unknown	Unknown	Unknown	Unknown
Unknown_81	5.48847	4.88991	GC_ISS	46.8831	-0.682433	0.502678	-1.35759	0.174592	0.503475	U	0	0	0	N	Unknown	Unknown	Unknown	Unknown	Unknown	Unknown	Unknown	Unknown	Unknown
Anaerotignum_1	2.11263	1.99191	GC_ISS	13.1155	-2.14506	1.62734	-1.31814	0.187458	0.51655	G	0	100	100	N	Anaerotignum	nt|MK287759.1	Bacteria	Firmicutes	Clostridia	Eubacteriales	Lachnospiraceae	Anaerotignum	Anaerotignum
Unknown_28	4.01981	3.53841	GC_ISS	19.7128	-0.787251	0.593626	-1.32617	0.184782	0.51655	U	0	0	0	N	Unknown	Unknown	Unknown	Unknown	Unknown	Unknown	Unknown	Unknown	Unknown
Flavonifractor_plautii_1	7.76763	8.0936	FLT_ISS	284.996	0.602098	0.465803	1.2926	0.196148	0.526963	S	0	100	100	N	Flavonifractor_plautii	16S_ribosomal_RNA|NR_029356.1	Bacteria	Firmicutes	Clostridia	Eubacteriales	Oscillospiraceae	Flavonifractor	Flavonifractor_plautii
Lachnospiraceae_7	11.4562	12.1345	FLT_ISS	4269.87	0.576798	0.451427	1.27772	0.201348	0.526963	F	0	100	100	N	Lachnospiraceae	nt|MZ130880.1	Bacteria	Firmicutes	Clostridia	Eubacteriales	Lachnospiraceae	Lachnospiraceae	Lachnospiraceae
Lactococcus_MS_1	6.4153	7.03024	FLT_ISS	123.783	0.588614	0.480927	1.22391	0.220984	0.526963	S	3	100	100	N	Lactococcus_cremoris;Lactococcus_lactis;Lactococcus_taiwanensis	16S_ribosomal_RNA|NR_040954.1;16S_ribosomal_RNA|NR_040955.1;16S_ribosomal_RNA|NR_114327.1	Bacteria	Firmicutes	Bacilli	Lactobacillales	Streptococcaceae	Lactococcus	Lactococcus_MS
Parabacteroides_goldsteinii_1	14.934	14.8206	GC_ISS	30466.9	-0.110623	0.089242	-1.23959	0.215129	0.526963	S	0	100	100	N	Parabacteroides_goldsteinii	16S_ribosomal_RNA|NR_043317.1	Bacteria	Bacteroidetes	Bacteroidia	Bacteroidales	Tannerellaceae	Parabacteroides	Parabacteroides_goldsteinii
Unknown_110	4.51023	4.88342	FLT_ISS	38.1651	0.797753	0.631305	1.26366	0.206353	0.526963	U	0	0	0	N	Unknown	Unknown	Unknown	Unknown	Unknown	Unknown	Unknown	Unknown	Unknown
Unknown_41	5.54344	5.33861	GC_ISS	62.924	-0.7516	0.611534	-1.22904	0.219057	0.526963	U	0	0	0	N	Unknown	Unknown	Unknown	Unknown	Unknown	Unknown	Unknown	Unknown	Unknown
Unknown_5	6.43115	7.00824	FLT_ISS	118.543	0.547114	0.437177	1.25147	0.210763	0.526963	U	0	0	0	Y	Unknown	Unknown	Unknown	Unknown	Unknown	Unknown	Unknown	Unknown	Unknown
Unknown_74	2.73528	3.26301	FLT_ISS	10.5656	0.696811	0.577804	1.20596	0.227832	0.53304	U	0	0	0	N	Unknown	Unknown	Unknown	Unknown	Unknown	Unknown	Unknown	Unknown	Unknown
Unknown_34	5.5752	6.31293	FLT_ISS	76.1205	0.62866	0.528899	1.18862	0.23459	0.538687	U	0	0	0	N	Unknown	Unknown	Unknown	Unknown	Unknown	Unknown	Unknown	Unknown	Unknown
Unknown_85	3.01869	3.63499	FLT_ISS	11.519	0.494318	0.44411	1.11305	0.265686	0.599001	U	0	0	0	N	Unknown	Unknown	Unknown	Unknown	Unknown	Unknown	Unknown	Unknown	Unknown
Unknown_86	10.418	10.1338	GC_ISS	1678.96	-0.608267	0.554681	-1.09661	0.272813	0.604087	U	0	0	0	N	Unknown	Unknown	Unknown	Unknown	Unknown	Unknown	Unknown	Unknown	Unknown
Unknown_23	3.98066	4.70494	FLT_ISS	25.0324	0.547298	0.508362	1.07659	0.281663	0.612741	U	0	0	0	N	Unknown	Unknown	Unknown	Unknown	Unknown	Unknown	Unknown	Unknown	Unknown
Unknown_72	4.67394	5.3222	FLT_ISS	38.2953	0.519276	0.487836	1.06445	0.287126	0.613855	U	0	0	0	N	Unknown	Unknown	Unknown	Unknown	Unknown	Unknown	Unknown	Unknown	Unknown
Unknown_42	4.89446	5.35426	FLT_ISS	40.5041	0.469878	0.458023	1.02588	0.304946	0.640904	U	0	0	0	N	Unknown	Unknown	Unknown	Unknown	Unknown	Unknown	Unknown	Unknown	Unknown
Unknown_30	2.79089	3.24791	FLT_ISS	9.87567	0.535985	0.529268	1.01269	0.311208	0.643163	U	0	0	0	N	Unknown	Unknown	Unknown	Unknown	Unknown	Unknown	Unknown	Unknown	Unknown
Clostridium_scindens_1	6.09577	6.12983	GC_ISS	107.975	-0.681924	0.697385	-0.97783	0.328158	0.667076	S	0	100	100	N	Clostridium_scindens	16S_ribosomal_RNA|NR_028785.1	Bacteria	Firmicutes	Clostridia	Eubacteriales	Clostridiaceae	Clostridium	Clostridium_scindens
Intestinimonas_butyriciproducens_1	6.24043	6.57099	FLT_ISS	142.798	0.705762	0.731382	0.964971	0.33456	0.669119	S	0	100	100	N	Intestinimonas_butyriciproducens	16S_ribosomal_RNA|NR_118554.1	Bacteria	Firmicutes	Clostridia	Eubacteriales	Eubacteriales	Intestinimonas	Intestinimonas_butyriciproducens
Anaerostipes_caccae_1	2.91901	3.53839	FLT_ISS	14.5368	0.586666	0.689378	0.851007	0.394765	0.776998	S	0	100	100	N	Anaerostipes_caccae	16S_ribosomal_RNA|NR_028915.1	Bacteria	Firmicutes	Clostridia	Eubacteriales	Lachnospiraceae	Anaerostipes	Anaerostipes_caccae
Unknown_78	2.50332	2.2463	GC_ISS	6.23532	-0.445147	0.536908	-0.829093	0.407052	0.788663	U	0	0	0	Y	Unknown	Unknown	Unknown	Unknown	Unknown	Unknown	Unknown	Unknown	Unknown
Unknown_105	7.63889	7.57379	GC_ISS	252.215	-0.448173	0.556781	-0.804935	0.420857	0.790701	U	0	0	0	N	Unknown	Unknown	Unknown	Unknown	Unknown	Unknown	Unknown	Unknown	Unknown
Unknown_9	2.80942	3.35527	FLT_ISS	10.2711	0.410715	0.510078	0.805199	0.420705	0.790701	U	0	0	0	N	Unknown	Unknown	Unknown	Unknown	Unknown	Unknown	Unknown	Unknown	Unknown
Unknown_22	4.23708	3.69525	GC_ISS	18.8899	-0.358103	0.462309	-0.774598	0.438577	0.811696	U	0	0	0	N	Unknown	Unknown	Unknown	Unknown	Unknown	Unknown	Unknown	Unknown	Unknown
Adlercreutzia_equolifaciens_1	6.34605	6.1938	GC_ISS	86.7464	-0.298493	0.40566	-0.73582	0.46184	0.84218	S	0	100	100	N	Adlercreutzia_equolifaciens	16S_ribosomal_RNA|NR_041494.1	Bacteria	Actinobacteria	Coriobacteriia	Eggerthellales	Eggerthellaceae	Adlercreutzia	Adlercreutzia_equolifaciens
Eisenbergiella_1	8.83465	8.90218	GC_ISS	813.041	-0.495934	0.745881	-0.664897	0.506117	0.848359	G	0	100	100	N	Eisenbergiella	nt|MK287744.1	Bacteria	Firmicutes	Clostridia	Eubacteriales	Lachnospiraceae	Eisenbergiella	Eisenbergiella
Enterocloster_MS_1	10.8222	11.2254	FLT_ISS	2293.68	0.253403	0.390021	0.649715	0.515876	0.848359	S	2	100	100	N	Enterocloster_bolteae;Enterocloster_clostridioformis	16S_ribosomal_RNA|NR_025567.1;16S_ribosomal_RNA|NR_118128.1	Bacteria	Firmicutes	Clostridia	Eubacteriales	Lachnospiraceae	Enterocloster	Enterocloster_MS
Providencia_MS_1	1.68226	2.05993	GC_ISS	7.08144	-0.587943	0.928977	-0.632893	0.526804	0.848359	S	5	100	100	N	Providencia_alcalifaciens;Providencia_rettgeri;Providencia_rustigianii;Providencia_sneebia;Providencia_vermicola	16S_ribosomal_RNA|NR_042411.1;16S_ribosomal_RNA|NR_042415.1;16S_ribosomal_RNA|NR_104913.1;16S_ribosomal_RNA|NR_115879.1;16S_ribosomal_RNA|NR_115880.1	Bacteria	Proteobacteria	Gammaproteobacteria	Enterobacterales	Morganellaceae	Providencia	Providencia_MS
Unknown_113	7.74121	7.61812	GC_ISS	335.035	-0.486361	0.713998	-0.68118	0.495758	0.848359	U	0	0	0	N	Unknown	Unknown	Unknown	Unknown	Unknown	Unknown	Unknown	Unknown	Unknown
Unknown_12	3.56335	3.27416	GC_ISS	12.6125	-0.305138	0.461138	-0.661706	0.50816	0.848359	U	0	0	0	N	Unknown	Unknown	Unknown	Unknown	Unknown	Unknown	Unknown	Unknown	Unknown
Unknown_2	2.66868	2.45646	GC_ISS	8.10837	-0.419688	0.607004	-0.69141	0.489308	0.848359	U	0	0	0	N	Unknown	Unknown	Unknown	Unknown	Unknown	Unknown	Unknown	Unknown	Unknown
Unknown_20	5.03553	5.07745	FLT_ISS	54.7895	0.488361	0.705036	0.692674	0.488514	0.848359	U	0	0	0	Y	Unknown	Unknown	Unknown	Unknown	Unknown	Unknown	Unknown	Unknown	Unknown
Unknown_52	2.77426	3.30389	FLT_ISS	9.76734	0.323437	0.505071	0.64038	0.521926	0.848359	U	0	0	0	N	Unknown	Unknown	Unknown	Unknown	Unknown	Unknown	Unknown	Unknown	Unknown
Unknown_70	3.68315	4.06872	FLT_ISS	17.3924	0.319935	0.475093	0.673416	0.500683	0.848359	U	0	0	0	N	Unknown	Unknown	Unknown	Unknown	Unknown	Unknown	Unknown	Unknown	Unknown
Unknown_89	10.7013	10.2834	GC_ISS	1814.86	-0.311405	0.500399	-0.622313	0.533736	0.848504	U	0	0	0	N	Unknown	Unknown	Unknown	Unknown	Unknown	Unknown	Unknown	Unknown	Unknown
Unknown_103	3.86588	3.77032	GC_ISS	14.6904	-0.189635	0.32226	-0.588452	0.556229	0.873068	U	0	0	0	N	Unknown	Unknown	Unknown	Unknown	Unknown	Unknown	Unknown	Unknown	Unknown
Unknown_107	3.97922	2.86516	FLT_ISS	129.227	1.39349	2.4194	0.575967	0.564637	0.875188	U	0	0	0	N	Unknown	Unknown	Unknown	Unknown	Unknown	Unknown	Unknown	Unknown	Unknown
Unknown_25	5.28642	5.159	GC_ISS	38.3391	-0.145521	0.258957	-0.56195	0.57415	0.878945	U	0	0	0	N	Unknown	Unknown	Unknown	Unknown	Unknown	Unknown	Unknown	Unknown	Unknown
Clostridium_3	5.3392	5.55917	FLT_ISS	58.4638	0.278198	0.58429	0.47613	0.633982	0.894673	G	0	100	100	N	Clostridium	nt|AF157052.1	Bacteria	Firmicutes	Clostridia	Eubacteriales	Clostridiaceae	Clostridium	Clostridium
Unknown_19	5.50039	5.20591	GC_ISS	48.647	-0.219184	0.465633	-0.470723	0.637838	0.894673	U	0	0	0	N	Unknown	Unknown	Unknown	Unknown	Unknown	Unknown	Unknown	Unknown	Unknown
Unknown_26	5.11577	5.22762	FLT_ISS	39.5678	0.196347	0.39161	0.501384	0.616101	0.894673	U	0	0	0	N	Unknown	Unknown	Unknown	Unknown	Unknown	Unknown	Unknown	Unknown	Unknown
Unknown_35	5.76011	6.24308	FLT_ISS	76.6903	0.234216	0.504013	0.464703	0.642144	0.894673	U	0	0	0	N	Unknown	Unknown	Unknown	Unknown	Unknown	Unknown	Unknown	Unknown	Unknown
Unknown_50	3.09201	2.55676	GC_ISS	9.13019	-0.265514	0.552377	-0.480675	0.630748	0.894673	U	0	0	0	N	Unknown	Unknown	Unknown	Unknown	Unknown	Unknown	Unknown	Unknown	Unknown
Unknown_53	1.50925	1.69863	FLT_ISS	4.36092	0.379564	0.7374	0.514733	0.606739	0.894673	U	0	0	0	N	Unknown	Unknown	Unknown	Unknown	Unknown	Unknown	Unknown	Unknown	Unknown
Unknown_56	3.70192	4.36852	FLT_ISS	30.2762	0.362511	0.778688	0.465541	0.641544	0.894673	U	0	0	0	Y	Unknown	Unknown	Unknown	Unknown	Unknown	Unknown	Unknown	Unknown	Unknown
Unknown_77	4.17508	4.13752	GC_ISS	20.8373	-0.232268	0.459597	-0.505373	0.613297	0.894673	U	0	0	0	N	Unknown	Unknown	Unknown	Unknown	Unknown	Unknown	Unknown	Unknown	Unknown
Clostridioides_difficile_1	7.6333	7.94453	FLT_ISS	306.262	0.281151	0.633018	0.444144	0.656939	0.899358	S	0	100	100	N	Clostridioides_difficile	16S_ribosomal_RNA|NR_113132.1	Bacteria	Firmicutes	Clostridia	Eubacteriales	Peptostreptococcaceae	Clostridioides	Clostridioides_difficile
Unknown_102	3.33899	3.4369	FLT_ISS	10.9414	0.158523	0.360364	0.439896	0.660012	0.899358	U	0	0	0	N	Unknown	Unknown	Unknown	Unknown	Unknown	Unknown	Unknown	Unknown	Unknown
Unknown_115	7.1366	7.24087	GC_ISS	212.856	-0.273862	0.649123	-0.421895	0.673101	0.907224	U	0	0	0	N	Unknown	Unknown	Unknown	Unknown	Unknown	Unknown	Unknown	Unknown	Unknown
Unknown_44	3.94561	3.68922	GC_ISS	17.2087	-0.192981	0.489642	-0.394125	0.693488	0.916026	U	0	0	0	Y	Unknown	Unknown	Unknown	Unknown	Unknown	Unknown	Unknown	Unknown	Unknown
Unknown_62	2.92142	2.88641	FLT_ISS	9.42986	0.209893	0.534239	0.392882	0.694407	0.916026	U	0	0	0	N	Unknown	Unknown	Unknown	Unknown	Unknown	Unknown	Unknown	Unknown	Unknown
Enterocloster_MS_2	8.82302	8.86684	FLT_ISS	571.613	0.158611	0.530869	0.298776	0.765111	0.938658	S	2	100	100	N	Enterocloster_asparagiformis;Enterocloster_lavalensis	16S_ribosomal_RNA|NR_042200.1;16S_ribosomal_RNA|NR_044289.1	Bacteria	Firmicutes	Clostridia	Eubacteriales	Lachnospiraceae	Enterocloster	Enterocloster_MS
Mucispirillum_schaedleri_1	9.13374	8.82619	GC_ISS	507.116	-0.158658	0.49903	-0.317933	0.750536	0.938658	S	0	100	100	N	Mucispirillum_schaedleri	16S_ribosomal_RNA|NR_042896.1	Bacteria	Deferribacteres	Deferribacteres	Deferribacterales	Deferribacteraceae	Mucispirillum	Mucispirillum_schaedleri
Unknown_1	8.55931	8.80194	FLT_ISS	480.561	0.154515	0.484913	0.318644	0.749996	0.938658	U	0	0	0	N	Unknown	Unknown	Unknown	Unknown	Unknown	Unknown	Unknown	Unknown	Unknown
Unknown_11	1.53373	2.57749	GC_ISS	43.8422	-0.845479	2.52458	-0.334899	0.737701	0.938658	U	0	0	0	N	Unknown	Unknown	Unknown	Unknown	Unknown	Unknown	Unknown	Unknown	Unknown
Unknown_14	2.22747	2.60176	FLT_ISS	9.63035	0.237141	0.807026	0.293846	0.768876	0.938658	U	0	0	0	N	Unknown	Unknown	Unknown	Unknown	Unknown	Unknown	Unknown	Unknown	Unknown
Unknown_21	3.32266	3.69002	FLT_ISS	13.3741	0.162142	0.479406	0.338214	0.735202	0.938658	U	0	0	0	N	Unknown	Unknown	Unknown	Unknown	Unknown	Unknown	Unknown	Unknown	Unknown
Unknown_47	3.46925	3.81537	FLT_ISS	17.4102	0.180724	0.623043	0.290068	0.771765	0.938658	U	0	0	0	N	Unknown	Unknown	Unknown	Unknown	Unknown	Unknown	Unknown	Unknown	Unknown
Unknown_67	2.13519	2.23973	GC_ISS	5.78527	-0.173794	0.600119	-0.2896	0.772122	0.938658	U	0	0	0	Y	Unknown	Unknown	Unknown	Unknown	Unknown	Unknown	Unknown	Unknown	Unknown
Erysipelatoclostridium_innocuum_1	7.8034	8.15804	FLT_ISS	322.918	0.156967	0.572594	0.274133	0.783983	0.943824	S	0	100	100	N	Erysipelatoclostridium_innocuum	nt|AB971793.1	Bacteria	Firmicutes	Erysipelotrichia	Erysipelotrichales	Erysipelotrichaceae	Erysipelatoclostridium	Erysipelatoclostridium_innocuum
Anaerotruncus_1	6.89835	7.63531	GC_ISS	286.144	-0.145507	0.902905	-0.161155	0.871972	0.975612	G	0	100	100	N	Anaerotruncus	nt|MK287644.1	Bacteria	Firmicutes	Clostridia	Eubacteriales	Oscillospiraceae	Anaerotruncus	Anaerotruncus
Anaerotruncus_colihominis_1	6.43627	5.13415	GC_ISS	120.191	-0.175149	0.85422	-0.205039	0.837542	0.975612	S	0	100	100	N	Anaerotruncus_colihominis	16S_ribosomal_RNA|NR_027558.1	Bacteria	Firmicutes	Clostridia	Eubacteriales	Oscillospiraceae	Anaerotruncus	Anaerotruncus_colihominis
Clostridium_4	6.7449	6.7611	GC_ISS	123.665	-0.045441	0.449808	-0.101023	0.919532	0.975612	G	0	100	99.3151	N	Clostridium	nt|MW768246.1	Bacteria	Firmicutes	Clostridia	Eubacteriales	Clostridiaceae	Clostridium	Clostridium
Coprobacillus_cateniformis_1	8.46996	8.48373	FLT_ISS	436.961	0.0593803	0.523252	0.113483	0.909647	0.975612	S	0	100	100	N	Coprobacillus_cateniformis	nt|GU811876.1	Bacteria	Firmicutes	Erysipelotrichia	Erysipelotrichales	Coprobacillaceae	Coprobacillus	Coprobacillus_cateniformis
Lachnospiraceae_4	3.86158	5.56273	GC_ISS	62.6794	-0.0849575	0.992852	-0.0855692	0.931809	0.975612	F	0	99.658	100	N	Lachnospiraceae	nt|MG702664.1	Bacteria	Firmicutes	Clostridia	Eubacteriales	Lachnospiraceae	Lachnospiraceae	Lachnospiraceae
Unknown_104	7.92403	7.62225	GC_ISS	258.097	-0.0854829	0.475249	-0.17987	0.857255	0.975612	U	0	0	0	N	Unknown	Unknown	Unknown	Unknown	Unknown	Unknown	Unknown	Unknown	Unknown
Unknown_108	0.00761915	0.538196	FLT_ISS	0.41995	0.566009	2.5127	0.225259	0.821778	0.975612	U	0	0	0	N	Unknown	Unknown	Unknown	Unknown	Unknown	Unknown	Unknown	Unknown	Unknown
Unknown_27	2.36469	2.45849	GC_ISS	7.2343	-0.0848349	0.628646	-0.134949	0.892653	0.975612	U	0	0	0	Y	Unknown	Unknown	Unknown	Unknown	Unknown	Unknown	Unknown	Unknown	Unknown
Unknown_3	2.11632	2.8532	GC_ISS	28.0845	-0.172945	1.72216	-0.100423	0.920008	0.975612	U	0	0	0	N	Unknown	Unknown	Unknown	Unknown	Unknown	Unknown	Unknown	Unknown	Unknown
Unknown_32	1.9655	1.8891	GC_ISS	5.81972	-0.0729799	0.737732	-0.0989247	0.921198	0.975612	U	0	0	0	N	Unknown	Unknown	Unknown	Unknown	Unknown	Unknown	Unknown	Unknown	Unknown
Unknown_46	4.05878	3.88428	GC_ISS	22.1478	-0.0676138	0.609943	-0.110853	0.911733	0.975612	U	0	0	0	Y	Unknown	Unknown	Unknown	Unknown	Unknown	Unknown	Unknown	Unknown	Unknown
Unknown_49	3.76297	3.77124	GC_ISS	14.2087	-0.0270892	0.338803	-0.0799555	0.936273	0.975612	U	0	0	0	N	Unknown	Unknown	Unknown	Unknown	Unknown	Unknown	Unknown	Unknown	Unknown
Unknown_57	4.27622	4.31769	GC_ISS	33.7321	-0.0850561	0.747636	-0.113767	0.909423	0.975612	U	0	0	0	N	Unknown	Unknown	Unknown	Unknown	Unknown	Unknown	Unknown	Unknown	Unknown
Unknown_6	4.17564	4.46298	FLT_ISS	23.0758	0.0675113	0.444867	0.151756	0.879379	0.975612	U	0	0	0	N	Unknown	Unknown	Unknown	Unknown	Unknown	Unknown	Unknown	Unknown	Unknown
Unknown_68	5.34719	5.49539	GC_ISS	52.5943	-0.0475219	0.513612	-0.092525	0.926281	0.975612	U	0	0	0	N	Unknown	Unknown	Unknown	Unknown	Unknown	Unknown	Unknown	Unknown	Unknown
Unknown_75	3.7221	3.73614	GC_ISS	21.1894	-0.151345	0.720158	-0.210156	0.833546	0.975612	U	0	0	0	Y	Unknown	Unknown	Unknown	Unknown	Unknown	Unknown	Unknown	Unknown	Unknown
Clostridium_symbiosum_1	9.05207	9.15729	FLT_ISS	589.565	0.0244366	0.36164	0.0675715	0.946127	0.977664	S	0	100	100	N	Clostridium_symbiosum	nt|EF025909.1	Bacteria	Firmicutes	Clostridia	Eubacteriales	Clostridiaceae	Clostridium	Clostridium_symbiosum
Unknown_10	7.47263	7.48434	GC_ISS	186.482	-0.0100348	0.310591	-0.0323088	0.974226	0.982146	U	0	0	0	N	Unknown	Unknown	Unknown	Unknown	Unknown	Unknown	Unknown	Unknown	Unknown
Unknown_69	3.43571	3.47163	FLT_ISS	15.1072	0.029076	0.599713	0.0484832	0.961331	0.982146	U	0	0	0	N	Unknown	Unknown	Unknown	Unknown	Unknown	Unknown	Unknown	Unknown	Unknown
Unknown_76	3.83485	4.17347	FLT_ISS	19.6549	0.0183894	0.498138	0.0369162	0.970552	0.982146	U	0	0	0	N	Unknown	Unknown	Unknown	Unknown	Unknown	Unknown	Unknown	Unknown	Unknown
Delftia_MS_1	2.43373	2.41523	FLT_ISS	6.54678	0.00844126	0.562133	0.0150165	0.988019	0.988019	S	3	100	100	N	Delftia_acidovorans;Delftia_lacustris;Delftia_tsuruhatensis	16S_ribosomal_RNA|NR_024786.1;16S_ribosomal_RNA|NR_113708.1;16S_ribosomal_RNA|NR_116495.1	Bacteria	Proteobacteria	Betaproteobacteria	Burkholderiales	Comamonadaceae	Delftia	Delftia_MS

## Sheet: alphaDiversity
comparison	alphaDiv_Index	TestType	pVal	padj	Stat	intConf1	intConf2
FLT_LAR Vs. GC_LAR	Observed	Wilcoxon	0.7485	0.7485	-1	-8	6
	Chao1	Wilcoxon	0.6065	0.6065	1.5	-6	8.2
	Shannon	tTest	0.15	0.15	-1.5	-0.37	0.063
	Simpson	tTest	0.1185	0.1185	-1.7	-0.12	0.015
	InvSimpson	tTest	0.1168	0.1168	-1.7	-1.1	0.14
	Evenness	tTest	0.2017	0.2017	-1.3	-0.076	0.018
comparison	alphaDiv_Index	TestType	pVal	padj	Stat	intConf1	intConf2
FLT_ISS vs. GC_ISS	Observed	Wilcoxon	0.0409	0.0409	5	2.1e-05	13
	Chao1	tTest	0.02537	0.02537	2.5	1	13
	Shannon	tTest	0.6351	0.6351	0.49	-0.14	0.22
	Simpson	tTest	0.8332	0.8332	0.21	-0.052	0.064
	InvSimpson	Wilcoxon	0.2991	0.2991	0.32	-0.66	0.71
	Evenness	tTest	0.9003	0.9003	0.13	-0.037	0.041

## Sheet: ordination
comparison	ordination_Method	varianceExplained	anova_pValue	signif
FLT_LAR Vs. GC_LAR	CCA	23.9581	9.999e-05	***
	RDA	23.0604	9.999e-05	***
	CAP	25.4595	0.00019998	***
comparison	ordination_Method	varianceExplained	anova_pValue	signif
GC_ISS_vs_FLT_ISS	CCA	21.2288	9.999e-05	***
	RDA	18.0451	0.00079992	***
	CAP	17.6322	0.00189981	**

## Sheet: ESV WGS species comparison
RefAnchorID	ESV	lowestTaxLevel	NumberOfAmbiguousHits	anchorPerSubOTU	RefAnchorID	identity	coverageQ	chimera	AmbiguousLabels	subjectid	OTU_2	AmbiguousHits_2	AmbiguousLabels_2	subjectid_2	Id/Cov_2	Domain	Phylum	Class	Order	Family	Genus	Species	anchorCollapsingDueToPrimer	totalcounts	WGS_subjectid	WGS_vs_16S_identity	WGS_vs_16S_querylength	WGS_vs_16S_coverageQ	WGS_alignStart	WGS_alignEnd	WGSlength
FLT_ISS_Rep1_10017	Parabacteroides_goldsteinii_1	S	0	548	FLT_ISS_Rep1_10017	100	100	N	Parabacteroides_goldsteinii	16S_ribosomal_RNA|NR_043317.1	Parabacteroides_goldsteinii	0	Parabacteroides_goldsteinii	nt|CP064353.1	100.0/100.0;99.658/100.0	Bacteria	Bacteroidetes	Bacteroidia	Bacteroidales	Tannerellaceae	Parabacteroides	Parabacteroides_goldsteinii	FLT_ISS_Rep1_10017	1052055	k127_467644	100	292	100	4389	4098	5284
FLT_ISS_Rep1_10419	Ligilactobacillus_MS_1	S	4	5	FLT_ISS_Rep1_10419	100	100	N	Ligilactobacillus_animalis;Ligilactobacillus_apodemi;Ligilactobacillus_faecis;Ligilactobacillus_murinus	16S_ribosomal_RNA|NR_041610.1;16S_ribosomal_RNA|NR_042231.1;16S_ribosomal_RNA|NR_042367.1;16S_ribosomal_RNA|NR_114391.1	Lactobacillales_MS	7	Lactobacillus_animalis;Lactobacillus_crispatus;Lactococcus_lactis;Ligilactobacillus_animalis;Ligilactobacillus_apodemi;Ligilactobacillus_faecis;Ligilactobacillus_murinus	nt|AB812751.1;nt|AB911454.1;nt|AB911456.1;nt|CP023565.1;nt|FJ167349.1;nt|LC071814.1;nt|LC519852.1	100.0/100.0;99.315/100.0;99.658/100.0	Bacteria	Firmicutes	Bacilli	Lactobacillales	Lactobacillaceae	Ligilactobacillus	Ligilactobacillus_MS	FLT_ISS_Rep1_10419	29003	k127_5794100	100	292	100	495	204	1045
FLT_ISS_Rep1_12948	Mucispirillum_schaedleri_1	S	0	4	FLT_ISS_Rep1_12948	100	100	N	Mucispirillum_schaedleri	16S_ribosomal_RNA|NR_042896.1	Mucispirillum_schaedleri	0	Mucispirillum_schaedleri	nt|AF059188.1	100.0/100.0;99.315/100.0;99.658/100.0	Bacteria	Deferribacteres	Deferribacteres	Deferribacterales	Deferribacteraceae	Mucispirillum	Mucispirillum_schaedleri	FLT_ISS_Rep1_12948	25795	k127_1164536	100	292	100	33291	33582	38313
FLT_ISS_Rep1_1368	Erysipelatoclostridium_cocleatum_1	S	0	51	FLT_ISS_Rep1_1368	100	100	N	Erysipelatoclostridium_cocleatum	nt|AF028350.1	-	-	-	-	-	Bacteria	Firmicutes	Erysipelotrichia	Erysipelotrichales	Erysipelotrichaceae	Erysipelatoclostridium	Erysipelatoclostridium_cocleatum	FLT_ISS_Rep1_1368	69090	k127_6684505	100	291	100	479	189	1092
FLT_ISS_Rep1_1561	Enterocloster_MS_2	S	2	2	FLT_ISS_Rep1_1561	100	100	N	Enterocloster_asparagiformis;Enterocloster_lavalensis	16S_ribosomal_RNA|NR_042200.1;16S_ribosomal_RNA|NR_044289.1	Enterocloster_MS	2	Enterocloster_asparagiformis;Enterocloster_lavalensis	nt|EF564278.1;nt|NR_042200.1	100.0/100.0;99.658/100.0	Bacteria	Firmicutes	Clostridia	Eubacteriales	Lachnospiraceae	Enterocloster	Enterocloster_MS	FLT_ISS_Rep1_1561	16396	k127_3492302	100	292	91.0959	53	318	318
FLT_ISS_Rep1_15930	Eisenbergiella_massiliensis_1	S	0	1	FLT_ISS_Rep1_15930	100	100	N	Eisenbergiella_massiliensis	16S_ribosomal_RNA|NR_144731.1	Eisenbergiella_massiliensis	0	Eisenbergiella_massiliensis	nt|LC515584.1	100.0/100.0	Bacteria	Firmicutes	Clostridia	Eubacteriales	Lachnospiraceae	Eisenbergiella	Eisenbergiella_massiliensis	FLT_ISS_Rep1_15930	8044	k127_409898	100	292	89.726	262	1	314
FLT_ISS_Rep1_17914	Clostridium_symbiosum_1	S	0	2	FLT_ISS_Rep1_17914	100	100	N	Clostridium_symbiosum	nt|EF025909.1	-	-	-	-	-	Bacteria	Firmicutes	Clostridia	Eubacteriales	Clostridiaceae	Clostridium	Clostridium_symbiosum	FLT_ISS_Rep1_17914	23108	k127_5982698	100	292	100	56	347	593
FLT_ISS_Rep1_1827	Adlercreutzia_equolifaciens_1	S	0	1	FLT_ISS_Rep1_1827	100	100	N	Adlercreutzia_equolifaciens	16S_ribosomal_RNA|NR_041494.1	Adlercreutzia_equolifaciens	0	Adlercreutzia_equolifaciens	nt|AB306660.1	100.0/100.0	Bacteria	Actinobacteria	Coriobacteriia	Eggerthellales	Eggerthellaceae	Adlercreutzia	Adlercreutzia_equolifaciens	FLT_ISS_Rep1_1827	2887	k127_936052	100	291	100	732	1022	5012
FLT_ISS_Rep1_2671	Erysipelatoclostridium_innocuum_1	S	0	3	FLT_ISS_Rep1_2671	100	100	N	Erysipelatoclostridium_innocuum	nt|AB971793.1	-	-	-	-	-	Bacteria	Firmicutes	Erysipelotrichia	Erysipelotrichales	Erysipelotrichaceae	Erysipelatoclostridium	Erysipelatoclostridium_innocuum	FLT_ISS_Rep1_2671	17086	k127_3028021	100	291	100	566	856	2707
FLT_ISS_Rep1_27984	Clostridioides_difficile_1	S	0	3	FLT_ISS_Rep1_27984	100	100	N	Clostridioides_difficile	16S_ribosomal_RNA|NR_113132.1	Clostridioides_difficile	0	Clostridioides_difficile	nt|AB632375.1	100.0/100.0;99.656/100.0	Bacteria	Firmicutes	Clostridia	Eubacteriales	Peptostreptococcaceae	Clostridioides	Clostridioides_difficile	FLT_ISS_Rep1_27984	23629	k127_4332202	100	291	100	254	544	1321
FLT_ISS_Rep1_31011	Anaerotruncus_colihominis_1	S	0	1	FLT_ISS_Rep1_31011	100	100	N	Anaerotruncus_colihominis	16S_ribosomal_RNA|NR_027558.1	Anaerotruncus_colihominis	0	Anaerotruncus_colihominis	nt|AJ315980.1	100.0/100.0	Bacteria	Firmicutes	Clostridia	Eubacteriales	Oscillospiraceae	Anaerotruncus	Anaerotruncus_colihominis	FLT_ISS_Rep1_31011	8085	k127_1846913	100	291	89.3471	260	1	261
FLT_ISS_Rep1_31429	Flavonifractor_plautii_1	S	0	3	FLT_ISS_Rep1_31429	100	100	N	Flavonifractor_plautii	16S_ribosomal_RNA|NR_029356.1	Flavonifractor_plautii	0	Flavonifractor_plautii	nt|AB693937.1	100.0/100.0;99.658/100.0	Bacteria	Firmicutes	Clostridia	Eubacteriales	Oscillospiraceae	Flavonifractor	Flavonifractor_plautii	FLT_ISS_Rep1_31429	13221	k127_489782	100	292	100	359	68	1236
FLT_ISS_Rep1_34770	Dysosmobacter_welbionis_1	S	0	1	FLT_ISS_Rep1_34770	100	100	N		nt|CP034413.3;nt|LT558848.1	-	-	-	-	-	Bacteria	Firmicutes	Clostridia	Eubacteriales	Oscillospiraceae	Dysosmobacter	Dysosmobacter_welbionis	FLT_ISS_Rep1_34770	579	k127_1229414	100	292	90.411	264	1	442
FLT_ISS_Rep1_45269	Lactococcus_MS_1	S	3	1	FLT_ISS_Rep1_45269	100	100	N	Lactococcus_cremoris;Lactococcus_lactis;Lactococcus_taiwanensis	16S_ribosomal_RNA|NR_040954.1;16S_ribosomal_RNA|NR_040955.1;16S_ribosomal_RNA|NR_114327.1	DBinconsistency_MS	6	Lactobacillus_delbrueckii;Lactococcus_cremoris;Lactococcus_lactis;Lactococcus_taiwanensis;Priestia_megaterium;Timema_monikensis	nt|AB598937.1;nt|AB601162.1;nt|CP070381.1;nt|KF193935.1;nt|KJ526937.1;nt|OB794246.1	100.0/100.0	Bacteria	Firmicutes	Bacilli	Lactobacillales	Streptococcaceae	Lactococcus	Lactococcus_MS	FLT_ISS_Rep1_45269	4347	k127_4458153	100	291	100	482	192	1707
FLT_ISS_Rep2_39998	Enterobacteriaceae_MS_1	S	7	1	FLT_ISS_Rep2_39998	100	100	N	Escherichia_coli;Escherichia_fergusonii;Escherichia_marmotae;Pseudescherichia_vulneris;Shigella_boydii;Shigella_flexneri;Shigella_sonnei	16S_ribosomal_RNA|NR_024570.1;16S_ribosomal_RNA|NR_026331.1;16S_ribosomal_RNA|NR_027549.1;16S_ribosomal_RNA|NR_104826.1;16S_ribosomal_RNA|NR_104901.1;16S_ribosomal_RNA|NR_119109.1;16S_ribosomal_RNA|NR_136472.1	Enterobacteriaceae_MS	8	Cronobacter_sakazakii;Escherichia_coli;Escherichia_fergusonii;Salmonella_enterica;Shigella_boydii;Shigella_dysenteriae;Shigella_flexneri;Shigella_sonnei	nt|AP024921.1;nt|CP086604.1;nt|KC835107.1;nt|KJ643933.1;nt|KJ643934.1;nt|KJ803862.1;nt|OL908024.1;nt|U92197.1	100.0/100.0	Bacteria	Proteobacteria	Gammaproteobacteria	Enterobacterales	Enterobacteriaceae	Enterobacteriaceae_MS	Enterobacteriaceae_MS	FLT_ISS_Rep2_39998	5152	k127_5279639	100	292	100	655	946	1634
FLT_ISS_Rep2_458	Clostridium_scindens_1	S	0	1	FLT_ISS_Rep2_458	100	100	N	Clostridium_scindens	16S_ribosomal_RNA|NR_028785.1	Clostridium_scindens	0	Clostridium_scindens	nt|AB020729.1	100.0/100.0	Bacteria	Firmicutes	Clostridia	Eubacteriales	Clostridiaceae	Clostridium	Clostridium_scindens	FLT_ISS_Rep2_458	2656	k127_753226	100	292	91.0959	266	1	302
FLT_ISS_Rep2_5497	Delftia_MS_1	S	3	1	FLT_ISS_Rep2_5497	100	100	N	Delftia_acidovorans;Delftia_lacustris;Delftia_tsuruhatensis	16S_ribosomal_RNA|NR_024786.1;16S_ribosomal_RNA|NR_113708.1;16S_ribosomal_RNA|NR_116495.1	DBinconsistency_MS	4	Delftia_acidovorans;Delftia_lacustris;Delftia_tsuruhatensis;Lactococcus_raffinolactis	nt|CP065627.1;nt|CP065748.1;nt|JF683687.1;nt|KC951911.1	100.0/100.0	Bacteria	Proteobacteria	Betaproteobacteria	Burkholderiales	Comamonadaceae	Delftia	Delftia_MS	FLT_ISS_Rep2_5497	241	k127_7219281	100	292	73.9726	1	216	448
FLT_LAR_Rep7_11154	Oscillibacter_valericigenes_1	S	0	1	FLT_LAR_Rep7_11154	100	100	N	Oscillibacter_valericigenes	nt|OK626622.1	-	-	-	-	-	Bacteria	Firmicutes	Clostridia	Eubacteriales	Oscillospiraceae	Oscillibacter	Oscillibacter_valericigenes	FLT_LAR_Rep7_11154	1232	k127_1865346	100	292	100	946	655	1342
GC_LAR_Rep1_10696	Acinetobacter_MS_1	S	9	1	GC_LAR_Rep1_10696	100	100	N	Acinetobacter_bereziniae;Acinetobacter_courvalinii;Acinetobacter_gerneri;Acinetobacter_guillouiae;Acinetobacter_gyllenbergii;Acinetobacter_junii;Acinetobacter_modestus;Acinetobacter_proteolyticus;Acinetobacter_vivianii	16S_ribosomal_RNA|NR_026208.1;16S_ribosomal_RNA|NR_042026.1;16S_ribosomal_RNA|NR_117625.1;16S_ribosomal_RNA|NR_117626.1;16S_ribosomal_RNA|NR_117627.1;16S_ribosomal_RNA|NR_148843.1;16S_ribosomal_RNA|NR_148845.1;16S_ribosomal_RNA|NR_148846.1;16S_ribosomal_RNA|NR_148847.1	DBinconsistency_MS	21	Acinetobacter_baumannii;Acinetobacter_bereziniae;Acinetobacter_calcoaceticus;Acinetobacter_courvalinii;Acinetobacter_gerneri;Acinetobacter_guillouiae;Acinetobacter_gyllenbergii;Acinetobacter_haemolyticus;Acinetobacter_indicus;Acinetobacter_johnsonii;Acinetobacter_junii;Acinetobacter_lwoffii;Acinetobacter_modestus;Acinetobacter_parvus;Acinetobacter_proteolyticus;Acinetobacter_schindleri;Acinetobac…	nt|AB680365.1;nt|AB777646.1;nt|AB859219.1;nt|AB859736.1;nt|AB860302.1;nt|CP018259.1;nt|CP031716.1;nt|CP041365.1;nt|CP085083.1;nt|GU227612.1;nt|KC477206.1	100.0/100.0	Bacteria	Proteobacteria	Gammaproteobacteria	Moraxellales	Moraxellaceae	Acinetobacter	Acinetobacter_MS	GC_LAR_Rep1_10696	372	k127_5334163	100	292	100	185	476	545
GC_LAR_Rep1_15118	Mammaliicoccus_MS_1	S	2	1	GC_LAR_Rep1_15118	100	100	N	Mammaliicoccus_fleurettii;Mammaliicoccus_lentus	16S_ribosomal_RNA|NR_041326.1;16S_ribosomal_RNA|NR_043418.1	Staphylococcaceae_MS	6	Mammaliicoccus_fleurettii;Mammaliicoccus_lentus;Mammaliicoccus_sciuri;Staphylococcus_argenteus;Staphylococcus_aureus;Staphylococcus_xylosus	nt|AB210985.1;nt|AB233330.1;nt|CP065792.1;nt|CP075498.1;nt|MT628393.1;nt|MW175849.1	100.0/100.0	Bacteria	Firmicutes	Bacilli	Bacillales	Staphylococcaceae	Mammaliicoccus	Mammaliicoccus_MS	GC_LAR_Rep1_15118	497	k127_4757518	100	292	100	1038	1329	2246
GC_LAR_Rep1_20941	Enterococcus_MS_1	S	14	1	GC_LAR_Rep1_20941	100	100	N	Enterococcus_canintestini;Enterococcus_canis;Enterococcus_dispar;Enterococcus_durans;Enterococcus_faecalis;Enterococcus_faecium;Enterococcus_hirae;Enterococcus_lactis;Enterococcus_mundtii;Enterococcus_olivae;Enterococcus_ratti;Enterococcus_rivorum;Enterococcus_saigonensis;Enterococcus_villorum	16S_ribosomal_RNA|NR_024904.1;16S_ribosomal_RNA|NR_024906.1;16S_ribosomal_RNA|NR_036921.1;16S_ribosomal_RNA|NR_036922.1;16S_ribosomal_RNA|NR_037082.1;16S_ribosomal_RNA|NR_040789.1;16S_ribosomal_RNA|NR_041933.1;16S_ribosomal_RNA|NR_042386.1;16S_ribosomal_RNA|NR_113903.1;16S_ribosomal_RNA|NR_113931.1;16S_ribosomal_RNA|NR_117043.1	DBinconsistency_MS	8	Enterococcus_durans;Enterococcus_faecalis;Enterococcus_faecium;Enterococcus_hirae;Enterococcus_lactis;Enterococcus_mundtii;Enterococcus_villorum;Naganishia_albida	nt|AB898315.1;nt|AB898317.1;nt|AB932549.1;nt|CP082267.1;nt|KF918537.1;nt|KJ702528.1;nt|OK087629.1;nt|OK087630.1	100.0/100.0	Bacteria	Firmicutes	Bacilli	Lactobacillales	Enterococcaceae	Enterococcus	Enterococcus_MS	GC_LAR_Rep1_20941	738	k127_6329953	100	292	100	484	193	2301
FLT_ISS_Rep5_19008	Providencia_MS_1	S	5	1	FLT_ISS_Rep5_19008	100	100	N	Providencia_alcalifaciens;Providencia_rettgeri;Providencia_rustigianii;Providencia_sneebia;Providencia_vermicola	16S_ribosomal_RNA|NR_042411.1;16S_ribosomal_RNA|NR_042415.1;16S_ribosomal_RNA|NR_104913.1;16S_ribosomal_RNA|NR_115879.1;16S_ribosomal_RNA|NR_115880.1	DBinconsistency_MS	15	Bacillus_aerius;Bacillus_subtilis;Listeria_monocytogenes;Proteus_columbae;Proteus_mirabilis;Providencia_alcalifaciens;Providencia_burhodogranariea;Providencia_rettgeri;Providencia_rustigianii;Providencia_sneebia;Providencia_stuartii;Providencia_vermicola;Salmonella_bongori;Salmonella_enterica;Vibrio_cholerae	nt|AB680422.1;nt|AB682262.1;nt|AY803746.1;nt|CP043925.1;nt|CP048796.1;nt|EU587030.1;nt|EU587053.1;nt|JN252100.1;nt|KX834865.1;nt|KX896677.1;nt|KY053295.1	100.0/100.0	Bacteria	Proteobacteria	Gammaproteobacteria	Enterobacterales	Morganellaceae	Providencia	Providencia_MS	FLT_ISS_Rep5_19008	1098	k127_1924067	99.658	292	100	423	714	1402
FLT_ISS_Rep2_8950	Erysipelatoclostridium_saccharogumia_1	S	0	1	FLT_ISS_Rep2_8950	100	100	N	Erysipelatoclostridium_saccharogumia	16S_ribosomal_RNA|NR_043550.1	Erysipelatoclostridium_saccharogumia	0	Erysipelatoclostridium_saccharogumia	nt|NR_043550.1	100.0/100.0	Bacteria	Firmicutes	Erysipelotrichia	Erysipelotrichales	Erysipelotrichaceae	Erysipelatoclostridium	Erysipelatoclostridium_saccharogumia	FLT_ISS_Rep2_8950	248	k127_6684505	99.656	291	100	479	189	1092
FLT_ISS_Rep1_12288	Enterocloster_MS_1	S	2	26	FLT_ISS_Rep1_12288	100	100	N	Enterocloster_bolteae;Enterocloster_clostridioformis	16S_ribosomal_RNA|NR_025567.1;16S_ribosomal_RNA|NR_118128.1	Enterocloster_MS	2	Enterocloster_bolteae;Enterocloster_clostridioformis	nt|CP022464.2;nt|CP050964.1	100.0/100.0;99.315/100.0;99.658/100.0	Bacteria	Firmicutes	Clostridia	Eubacteriales	Lachnospiraceae	Enterocloster	Enterocloster_MS	FLT_ISS_Rep1_12288	61871	k127_2769947	99.315	292	100	29	320	342
FLT_ISS_Rep1_40370	Blautia_MS_1	S	3	2	FLT_ISS_Rep1_40370	100	100	N	Blautia_hansenii;Blautia_hominis;Blautia_marasmi	16S_ribosomal_RNA|NR_104687.1;16S_ribosomal_RNA|NR_147395.1;16S_ribosomal_RNA|NR_163634.1	Blautia_MS	4	Blautia_hansenii;Blautia_hominis;Blautia_marasmi;Blautia_producta	nt|AY937379.1;nt|CP022413.2;nt|MZ348890.1;nt|NR_147395.1	100.0/100.0;99.658/100.0	Bacteria	Firmicutes	Clostridia	Eubacteriales	Lachnospiraceae	Blautia	Blautia_MS	FLT_ISS_Rep1_40370	10347	k127_2128898	99.315	292	100	226	517	547
FLT_ISS_Rep4_25463	Enterocloster_clostridioformis_1	S	0	1	FLT_ISS_Rep4_25463	100	100	N	Enterocloster_clostridioformis	nt|CP050964.1	-	-	-	-	-	Bacteria	Firmicutes	Clostridia	Eubacteriales	Lachnospiraceae	Enterocloster	Enterocloster_clostridioformis	FLT_ISS_Rep4_25463	1395	k127_2769947	98.973	292	100	29	320	342
FLT_ISS_Rep2_30506	Extibacter_muris_1	S	0	1	FLT_ISS_Rep2_30506	100	100	N	Extibacter_muris	16S_ribosomal_RNA|NR_144610.1	Extibacter_muris	0	Extibacter_muris	nt|KU196087.1	100.0/100.0	Bacteria	Firmicutes	Clostridia	Eubacteriales	Lachnospiraceae	Extibacter	Extibacter_muris	FLT_ISS_Rep2_30506	727	k127_7009638	98.859	292	90.0685	86	348	348
FLT_ISS_Rep1_25317	Hungatella_xylanolytica_1	S	0	2	FLT_ISS_Rep1_25317	100	100	N	Hungatella_xylanolytica	nt|OK626617.1	-	-	-	-	-	Bacteria	Firmicutes	Clostridia	Eubacteriales	Clostridiaceae	Hungatella	Hungatella_xylanolytica	FLT_ISS_Rep1_25317	23688	k127_811496	98.63	292	100	40	331	333
FLT_ISS_Rep1_10995	Coprobacillus_cateniformis_1	S	0	4	FLT_ISS_Rep1_10995	100	100	N	Coprobacillus_cateniformis	nt|GU811876.1	-	-	-	-	-	Bacteria	Firmicutes	Erysipelotrichia	Erysipelotrichales	Coprobacillaceae	Coprobacillus	Coprobacillus_cateniformis	FLT_ISS_Rep1_10995	12452	k127_5551775	98.625	291	100	34	324	384
FLT_ISS_Rep1_2201	Enterocloster_aldenensis_2	S	0	1	FLT_ISS_Rep1_2201	100	100	N	Enterocloster_aldenensis	nt|LC515574.1	-	-	-	-	-	Bacteria	Firmicutes	Clostridia	Eubacteriales	Lachnospiraceae	Enterocloster	Enterocloster_aldenensis	FLT_ISS_Rep1_2201	8414	k127_2546497	98.288	292	100	105	396	398
FLT_ISS_Rep2_41909	Enterocloster_aldenensis_1	S	0	1	FLT_ISS_Rep2_41909	100	100	N	Enterocloster_aldenensis	16S_ribosomal_RNA|NR_043680.1	Enterocloster_aldenensis	0	Enterocloster_aldenensis	nt|NR_043680.1	100.0/100.0	Bacteria	Firmicutes	Clostridia	Eubacteriales	Lachnospiraceae	Enterocloster	Enterocloster_aldenensis	FLT_ISS_Rep2_41909	2445	k127_2546497	97.945	292	100	105	396	398
FLT_ISS_Rep4_49473	Anaerostipes_caccae_1	S	0	1	FLT_ISS_Rep4_49473	100	100	N	Anaerostipes_caccae	16S_ribosomal_RNA|NR_028915.1	Lachnospiraceae_MS	3	Anaerostipes_caccae;Anaerostipes_faecis;Lacrimispora_indolis	nt|AF028351.1;nt|AP023027.1;nt|OK383414.1	100.0/100.0	Bacteria	Firmicutes	Clostridia	Eubacteriales	Lachnospiraceae	Anaerostipes	Anaerostipes_caccae	FLT_ISS_Rep4_49473	451	k127_4440391	97.328	292	89.726	83	344	344
FLT_ISS_Rep2_78341	Intestinimonas_butyriciproducens_1	S	0	1	FLT_ISS_Rep2_78341	100	100	N	Intestinimonas_butyriciproducens	16S_ribosomal_RNA|NR_118554.1	Intestinimonas_butyriciproducens	0	Intestinimonas_butyriciproducens	nt|CP011524.1	100.0/100.0	Bacteria	Firmicutes	Clostridia	Eubacteriales	Eubacteriales	Intestinimonas	Intestinimonas_butyriciproducens	FLT_ISS_Rep2_78341	4467	k127_2460320	97.26	292	100	359	68	4854
FLT_ISS_Rep5_50895	Romboutsia_timonensis_1	S	0	1	FLT_ISS_Rep5_50895	100	100	N	Romboutsia_timonensis	16S_ribosomal_RNA|NR_144740.1	Romboutsia_MS	2	Romboutsia_ilealis;Romboutsia_timonensis	nt|LN555523.1;nt|MT903115.1	100.0/100.0	Bacteria	Firmicutes	Clostridia	Eubacteriales	Peptostreptococcaceae	Romboutsia	Romboutsia_timonensis	FLT_ISS_Rep5_50895	208	k127_4332202	96.22	291	100	254	544	1321
FLT_ISS_Rep5_14838	Romboutsia_ilealis_1	S	0	1	FLT_ISS_Rep5_14838	100	100	N	Romboutsia_ilealis	nt|LN555523.1	-	-	-	-	-	Bacteria	Firmicutes	Clostridia	Eubacteriales	Peptostreptococcaceae	Romboutsia	Romboutsia_ilealis	FLT_ISS_Rep5_14838	297	k127_4332202	95.876	291	100	254	544	1321
