# Supplementary material for: Spaceflight alters host-gut microbiota interactions
Source: Research Square preprint supplement (doi:10.21203/rs.3.rs-3879489/v1), 2024-06-11
Supplement: Supplementary file 4 [file cd82e189594b8aec1798c13e.xlsx]

## Sheet: Colon RNASeq Count summary
Samples	total transcripts	n_missing	non-zero transcripts	numeric.mean	numeric.sd	numeric.p0	numeric.p25	numeric.p50	numeric.p75	numeric.p100	numeric.hist
FLT_ISS_Rep1	39794	0	26577	887.308	39281.5	0	0	0	73	5790621	▇▁▁▁▁
FLT_ISS_Rep2		0	26391	1049.09	18803.2	0	0	0	107	3129815	▇▁▁▁▁
FLT_ISS_Rep3		0	26140	1181.8	32170.4	0	0	0	118	6013244	▇▁▁▁▁
FLT_ISS_Rep4		0	25424	1011.72	20097.1	0	0	0	94	2681872	▇▁▁▁▁
FLT_ISS_Rep5		0	24883	837.248	44744.6	0	0	0	52	7420614	▇▁▁▁▁
FLT_ISS_Rep6		0	25326	617.802	26877.9	0	0	0	66	5052826	▇▁▁▁▁
FLT_ISS_Rep7		0	25132	638.498	16982.3	0	0	0	71	2354378	▇▁▁▁▁
FLT_ISS_Rep8		0	25961	948.177	31951.2	0	0	0	100	4949771	▇▁▁▁▁
FLT_ISS_Rep9		0	25861	833.373	22680.7	0	0	0	95	3508473	▇▁▁▁▁
FLT_LAR_Rep1		0	26806	999.625	23844	0	0	0	114	3797979	▇▁▁▁▁
FLT_LAR_Rep10		0	25469	1142.59	31192.4	0	0	0	82	4351492	▇▁▁▁▁
FLT_LAR_Rep2		0	26342	849.83	25904.2	0	0	0	90	4420440	▇▁▁▁▁
FLT_LAR_Rep3		0	25643	1225.76	15597.8	0	0	0	110	1904073	▇▁▁▁▁
FLT_LAR_Rep4		0	25779	1304.35	16023.1	0	0	0	116	1550254	▇▁▁▁▁
FLT_LAR_Rep5		0	25914	1219.91	13343.5	0	0	0	115	1493951	▇▁▁▁▁
FLT_LAR_Rep6		0	26476	991.813	24569.7	0	0	0	108	4070643	▇▁▁▁▁
FLT_LAR_Rep7		0	26510	938.806	37258.5	0	0	0	92	6673204	▇▁▁▁▁
FLT_LAR_Rep8		0	25120	1153.1	25009.4	0	0	0	87.25	3461235	▇▁▁▁▁
FLT_LAR_Rep9		0	25595	1218.96	37275.8	0	0	0	91	4948991	▇▁▁▁▁
GC_ISS_Rep1		0	22372	818.744	62336.1	0	0	0	35	13187751	▇▁▁▁▁
GC_ISS_Rep2		0	26212	761.921	24309.9	0	0	0	84	3580617	▇▁▁▁▁
GC_ISS_Rep3		0	25993	1090.15	15993.6	0	0	0	99	2041470	▇▁▁▁▁
GC_ISS_Rep4		0	26264	1231.24	20415.4	0	0	0	122	3432779	▇▁▁▁▁
GC_ISS_Rep5		0	26219	1093.28	20184	0	0	0	89	2679746	▇▁▁▁▁
GC_ISS_Rep6		0	26951	746.215	22514.2	0	0	0	99	3705640	▇▁▁▁▁
GC_ISS_Rep7		0	26606	763.66	23446.9	0	0	0	109	4099251	▇▁▁▁▁
GC_ISS_Rep8		0	26294	1034.68	34268.9	0	0	0	128	6619901	▇▁▁▁▁
GC_ISS_Rep9		0	25732	751.314	24779.1	0	0	0	87	3321530	▇▁▁▁▁
GC_LAR_Rep1		0	26931	1057.79	27988.6	0	0	0	107	3879782	▇▁▁▁▁
GC_LAR_Rep2		0	27538	956.066	22861.6	0	0	0	122	3187012	▇▁▁▁▁
GC_LAR_Rep3		0	30294	540.851	27174	0	0	1	40	4694368	▇▁▁▁▁
GC_LAR_Rep4		0	25751	1349.41	20993.6	0	0	0	116	3398802	▇▁▁▁▁
GC_LAR_Rep5		0	25340	1213.02	14792.2	0	0	0	103.25	1529489	▇▁▁▁▁
GC_LAR_Rep6		0	25698	1379.93	17837.3	0	0	0	117	1936645	▇▁▁▁▁
GC_LAR_Rep7		0	25690	1048.13	26410.3	0	0	0	94	3797911	▇▁▁▁▁
GC_LAR_Rep8		0	26161	939.113	28814	0	0	0	106	4137746	▇▁▁▁▁

## Sheet: Liver RNASeq Count Summary
Samples	total transcripts	n_missing	non-zero transcripts	numeric.mean	numeric.sd	numeric.p0	numeric.p25	numeric.p50	numeric.p75	numeric.p100	numeric.hist
FLT_ISS_Rep1	34924	0	23666	1546.61	61295.4	0	0	0	43	9077340	▇▁▁▁▁
FLT_ISS_Rep10		0	21267	1187.42	43447.3	0	0	0	22	8007161	▇▁▁▁▁
FLT_ISS_Rep2		0	22779	1413.44	49127.5	0	0	0	35	6101719	▇▁▁▁▁
FLT_ISS_Rep3		0	23173	1458.18	59599.5	0	0	0	42	8922008	▇▁▁▁▁
FLT_ISS_Rep4		0	22784	1641.91	64367.2	0	0	0	37	8511000	▇▁▁▁▁
FLT_ISS_Rep5		0	22466	1621.2	48395.2	0	0	0	34	5767135	▇▁▁▁▁
FLT_ISS_Rep6		0	22218	1294.85	58899.2	0	0	0	28	11646445	▇▁▁▁▁
FLT_ISS_Rep7		0	22108	1393.19	67653.6	0	0	0	29	14272114	▇▁▁▁▁
FLT_ISS_Rep8		0	21663	1345.12	58266.2	0	0	0	26	11224779	▇▁▁▁▁
FLT_ISS_Rep9		0	20814	1068.89	54051.7	0	0	0	18	11672709	▇▁▁▁▁
FLT_LAR_Rep1		0	23043	1438.8	81466.1	0	0	0	33	16644048	▇▁▁▁▁
FLT_LAR_Rep10		0	23503	939.09	65750	0	0	0	11	13771539	▇▁▁▁▁
FLT_LAR_Rep2		0	22726	1526.8	97793.1	0	0	0	31	20613867	▇▁▁▁▁
FLT_LAR_Rep3		0	23182	1587.97	113919	0	0	0	35	25157489	▇▁▁▁▁
FLT_LAR_Rep4		0	22869	1500.18	101347	0	0	0	32	21376344	▇▁▁▁▁
FLT_LAR_Rep5		0	22460	1652.48	119947	0	0	0	27	25324797	▇▁▁▁▁
FLT_LAR_Rep6		0	22616	1715.84	111208	0	0	0	30	20166455	▇▁▁▁▁
FLT_LAR_Rep7		0	22110	1665.98	60613.6	0	0	0	29	11396060	▇▁▁▁▁
FLT_LAR_Rep8		0	22929	1602.99	63976.7	0	0	0	34	9720619	▇▁▁▁▁
FLT_LAR_Rep9		0	21639	947.999	59250.1	0	0	0	22	13233600	▇▁▁▁▁
GC_ISS_Rep1		0	22839	1552.45	75232.9	0	0	0	32	13772320	▇▁▁▁▁
GC_ISS_Rep10		0	21177	1131.99	56759.2	0	0	0	21	12065609	▇▁▁▁▁
GC_ISS_Rep2		0	22108	1363.82	72719.2	0	0	0	24	14167875	▇▁▁▁▁
GC_ISS_Rep3		0	22595	1503.29	84549.4	0	0	0	28	15942855	▇▁▁▁▁
GC_ISS_Rep4		0	22599	1556.5	79951.4	0	0	0	28	15490774	▇▁▁▁▁
GC_ISS_Rep5		0	22553	1818.81	70492.5	0	0	0	34	11171377	▇▁▁▁▁
GC_ISS_Rep6		0	21623	1202.8	70555.6	0	0	0	21	15288257	▇▁▁▁▁
GC_ISS_Rep7		0	21317	1040.73	58336.3	0	0	0	21	12391629	▇▁▁▁▁
GC_ISS_Rep8		0	21488	1103.51	46533.1	0	0	0	23	9090157	▇▁▁▁▁
GC_ISS_Rep9		0	20614	1012.17	54895.5	0	0	0	17	12032332	▇▁▁▁▁
GC_LAR_Rep1		0	22328	1651.7	114793	0	0	0	28	24069314	▇▁▁▁▁
GC_LAR_Rep2		0	23041	1673.54	115770	0	0	0	35	24757098	▇▁▁▁▁
GC_LAR_Rep3		0	22231	1582.25	112987	0	0	0	25	21281102	▇▁▁▁▁
GC_LAR_Rep4		0	22222	1715	75577.3	0	0	0	28	14280078	▇▁▁▁▁
GC_LAR_Rep5		0	22352	1695.19	88848	0	0	0	31	17102330	▇▁▁▁▁
GC_LAR_Rep6		0	22720	1701.43	92660.4	0	0	0	33	18150938	▇▁▁▁▁
GC_LAR_Rep7		0	23105	1842.32	108849	0	0	0	34	18677694	▇▁▁▁▁
GC_LAR_Rep8		0	21224	907.002	53378.1	0	0	0	19	11500910	▇▁▁▁▁
GC_LAR_Rep9		0	21091	836.651	46175.1	0	0	0	18	10051106	▇▁▁▁▁

## Sheet: Sparsity test
	Colon	Colon	Liver	Liver
	GC_LAR_vs_FLT_LAR	GC_ISS_vs_FLT_ISS	GC_LAR_vs_FLT_LAR	GC_ISS_vs_FLT_ISS
Total transcripts	39794	39794	34924	34924
failing sparsity test	13495	13632	12090	12163
passing sparsity test	26299	26162	22834	22761

## Sheet: DESeq2 summary
	Colon	Colon	Liver	Liver
	GC_ISS_vs_FLT_ISS	GC_LAR_vs_FLT_LAR	GC_ISS_vs_FLT_ISS	GC_LAR_vs_FLT_LAR
Total transcripts	26162	26299	22761	22834
DE transcripts ; padj < 0.1	4476	4613	4068	4029
higher in FLT_ISS	2079	1974	2179	2012
higher in GC_ISS	2397	2639	1889	2017

## Sheet: Col LAR <0.1 fdr
Gene model	total_samples	occurrence_total	occurrence_FLT_LAR	occurrence_GC_LAR	sparsity	rlog_av_GC_LAR	rlog_av_FLT_LAR	vst_av_GC_LAR	vst_av_FLT_LAR	raw_av_GC_LAR	raw_av_FLT_LAR	structural_zero	DESeq2Norm_av_GC_LAR	DESeq2Norm_av_FLT_LAR	baseMean	log2FoldChange	lfcSE	stat	pvalue	padj	errorBarUp	errorBarLow	Final_Regulation	SYMBOL	GENENAME	ENTREZID
ENSMUSG00000034254	18	18	10	8	0.0898503	12.0675	12.1855	12.0592	12.2311	4680.88	5193.5	No	4240.69	4778.36	4539.4	0.171325	0.112455	2.31097	8.68353e-05	0.00094367	0.28378	0.0588694	FLT_LAR	Agpat1	1-acylglycerol-3-phosphate O-acyltransferase 1 (lysophosphatidic acid acyltransferase, alpha)	55979
ENSMUSG00000026922	18	18	10	8	0.0933486	11.5635	11.6927	11.5615	11.7486	3325.5	3723.2	No	3009.96	3436.05	3246.68	0.190499	0.153178	1.5386	0.0089751	0.0569448	0.343678	0.0373209	FLT_LAR	Agpat2	1-acylglycerol-3-phosphate O-acyltransferase 2 (lysophosphatidic acid acyltransferase, beta)	67512
ENSMUSG00000001211	18	18	10	8	0.0822281	11.2779	11.3585	11.2975	11.4142	2675.62	2880.9	No	2456.21	2675.34	2577.95	0.121638	0.0925523	1.72363	0.00342005	0.0248945	0.214191	0.0290861	FLT_LAR	Agpat3	1-acylglycerol-3-phosphate O-acyltransferase 3	28169
ENSMUSG00000032623	18	18	10	8	0.118132	4.16236	4.00957	6.23887	6.08557	23.75	17.4	No	21.1024	15.172	17.8077	-0.471416	0.360152	1.75552	0.00286946	0.0213604	-0.111264	-0.831568	GC_LAR	Oas1d	2'-5' oligoadenylate synthetase 1D	100535
ENSMUSG00000032661	18	18	10	8	0.162117	7.22725	7.54687	7.68608	8.06732	145	239.3	No	142.885	217.162	184.15	0.607362	0.27777	4.682	1.77636e-15	7.1214e-14	0.885132	0.329592	FLT_LAR	Oas3	2'-5' oligoadenylate synthetase 3	246727
ENSMUSG00000041827	18	18	10	8	0.0982534	9.43727	9.5592	9.54809	9.71391	717.875	862.8	No	678.77	797.593	744.783	0.233239	0.166131	1.95839	0.000881256	0.00761895	0.399369	0.0671077	FLT_LAR	Oasl1	2'-5' oligoadenylate synthetase-like 1	231655
ENSMUSG00000029561	18	18	10	8	0.110374	9.94059	10.1496	9.98723	10.2774	1021.88	1337	No	957.167	1234.34	1111.15	0.366576	0.203834	3.1975	5.62621e-08	1.06449e-06	0.570409	0.162742	FLT_LAR	Oasl2	2'-5' oligoadenylate synthetase-like 2	23962
ENSMUSG00000028167	18	18	10	8	0.0905512	5.56882	5.74146	6.7112	6.89145	50.875	60.9	No	45.5605	57.1558	52.0023	0.297887	0.205017	2.12761	0.000302324	0.00291452	0.502904	0.0928695	FLT_LAR	Bdh2	3-hydroxybutyrate dehydrogenase, type 2	69772
ENSMUSG00000007908	18	18	10	8	0.0933471	6.69097	6.59264	7.42695	7.31912	115.5	101.5	No	107.525	95.1716	100.662	-0.188516	0.13847	1.86635	0.00152646	0.0123407	-0.0500458	-0.326986	GC_LAR	Hmgcll1	3-hydroxymethyl-3-methylglutaryl-Coenzyme A lyase-like 1	208982
ENSMUSG00000108366	18	17	9	8	0.117647	2.68836	2.54488	5.87841	5.6801	8.125	5.4	No	8.82073	4.74931	6.55883	-0.724573	0.435305	2.8746	1.05064e-06	1.65059e-05	-0.289269	-1.15988	GC_LAR	Gm5586	40S RIBOSOMAL PROTEIN S3A (V-FOS TRANSFORMATION EFFECTOR PROTEIN)	434127
ENSMUSG00000081572	18	14	7	7	0.269231	0.511982	0.460031	5.50863	5.39893	2	1	No	2.20565	1.00549	1.53889	-1.02577	0.829315	1.63555	0.00547542	0.0370556	-0.196458	-1.85509	GC_LAR	Gm14138	40S ribosomal protein S6 (Phosphoprotein NP33)	545640
ENSMUSG00000057880	18	18	10	8	0.0913947	14.0587	14.2404	14.0111	14.281	19267.6	21986.3	No	17040.8	20171.8	18780.2	0.243188	0.167442	2.09405	0.000376111	0.00355803	0.41063	0.0757457	FLT_LAR	Abat	4-aminobutyrate aminotransferase	268860
ENSMUSG00000043155	18	18	10	8	0.11586	8.27905	8.48724	8.51663	8.78875	353.75	444.6	No	308.242	391.533	354.515	0.340819	0.236247	2.06616	0.000449899	0.00418384	0.577065	0.104572	FLT_LAR	Hpdl	4-hydroxyphenylpyruvate dioxygenase-like	242642
ENSMUSG00000084325	18	12	7	5	0.307692	0.539735	0.481959	5.47613	5.39715	2	1	No	2.32244	0.968258	1.57012	-1.2061	0.989619	1.4927	0.0112432	0.0686679	-0.216476	-2.19571	GC_LAR	Gm15550	5-aminoimidazole-4-carboxamide ribonucleotide formyltransferase/IMP cyclohydrolase pseudogene	665747
ENSMUSG00000070687	18	18	10	8	0.115079	4.57727	4.72857	6.28088	6.43436	24.625	30.7	No	22.2822	29.1735	26.1107	0.35558	0.256491	1.92292	0.00109202	0.00920761	0.612071	0.0990887	FLT_LAR	Htr1d	5-hydroxytryptamine (serotonin) receptor 1D	15552
ENSMUSG00000041380	18	9	5	4	0.285714	0.351297	0.276757	5.44179	5.34478	1.5	0.9	No	3.01412	0.722609	1.74106	-1.72232	1.27146	1.90872	0.00118877	0.00991864	-0.450854	-2.99378	GC_LAR	Htr2c	5-hydroxytryptamine (serotonin) receptor 2C	15560
ENSMUSG00000021311	18	18	10	8	0.0818401	9.84875	9.97097	9.92466	10.0965	974.375	1090	No	912.659	1023.91	974.463	0.163132	0.101241	2.58834	1.10385e-05	0.000146027	0.264373	0.0618906	FLT_LAR	Mtr	5-methyltetrahydrofolate-homocysteine methyltransferase	238505
ENSMUSG00000054958	18	18	10	8	0.133633	6.42456	6.63139	7.19083	7.41072	80.625	113.6	No	85.4157	108.905	98.4651	0.376441	0.249801	2.2335	0.000148755	0.0015402	0.626241	0.12664	FLT_LAR	Nt5c1a	5'-nucleotidase, cytosolic IA	230718
ENSMUSG00000025041	18	18	10	8	0.0852983	10.1607	10.2675	10.2209	10.3721	1190	1321.2	No	1126.41	1260.31	1200.8	0.16261	0.0913592	3.15264	8.59771e-08	1.58897e-06	0.253969	0.0712506	FLT_LAR	Nt5c2	5'-nucleotidase, cytosolic II	76952
ENSMUSG00000078180	18	18	10	8	0.151515	3.05499	2.89686	5.9454	5.76901	12	6.9	No	10.572	6.29611	8.19651	-0.763872	0.42263	3.32918	1.56824e-08	3.17988e-07	-0.341242	-1.1865	GC_LAR	Gm20900	60S ribosomal protein L23a pseudogene	105243593
ENSMUSG00000082867	18	18	10	8	0.155405	5.01962	4.79346	6.60988	6.37954	39.875	27.3	No	51.3124	29.3258	39.0976	-0.792636	0.555179	2.03688	0.000541738	0.00494007	-0.237456	-1.34782	GC_LAR	Gm15730	60S ribosomal protein L27 pseudogene	108169022
ENSMUSG00000025271	18	18	10	8	0.107634	6.19345	5.95954	7.16384	6.91839	85.75	62.4	No	80.1277	59.1301	68.4623	-0.44368	0.161258	7.60716	2.22045e-16	9.41863e-15	-0.282422	-0.604938	GC_LAR	Pfkfb1	6-phosphofructo-2-kinase/fructose-2,6-biphosphatase 1	18639
ENSMUSG00000026773	18	18	10	8	0.113099	9.45957	9.244	9.65213	9.36043	804.125	620.2	No	778.098	594.829	676.282	-0.388304	0.202233	3.7114	2.91871e-10	7.28264e-09	-0.186072	-0.590537	GC_LAR	Pfkfb3	6-phosphofructo-2-kinase/fructose-2,6-biphosphatase 3	170768
ENSMUSG00000031807	18	18	10	8	0.0860693	10.4529	10.5382	10.5027	10.6241	1503.25	1654.4	No	1385.69	1517.23	1458.77	0.129815	0.097339	1.77563	0.00256526	0.019414	0.227154	0.0324762	FLT_LAR	Pgls	6-phosphogluconolactonase	66171
ENSMUSG00000040537	18	18	10	8	0.0822565	9.47237	9.59199	9.58022	9.74471	739.625	847.7	No	699.406	795.465	752.772	0.185198	0.120934	2.33436	7.35715e-05	0.000812965	0.306133	0.0642641	FLT_LAR	Adam22	a disintegrin and metallopeptidase domain 22	11496
ENSMUSG00000025964	18	18	10	8	0.0817208	10.418	10.6213	10.4373	10.728	1453.5	1731.2	No	1335.38	1626.15	1496.92	0.280723	0.104379	7.18354	2.22045e-16	9.41863e-15	0.385102	0.176343	FLT_LAR	Adam23	a disintegrin and metallopeptidase domain 23	23792
ENSMUSG00000037437	18	18	10	8	0.117424	3.537	3.73687	5.8969	6.11196	11.25	17.4	No	9.81142	16.0596	13.2826	0.663322	0.411882	2.60114	9.98468e-06	0.000132821	1.0752	0.25144	FLT_LAR	Adam32	a disintegrin and metallopeptidase domain 32	353188
ENSMUSG00000031554	18	18	10	8	0.109589	3.38113	3.47451	5.90783	6.01309	10.25	13.7	No	9.22699	12.3036	10.9362	0.384878	0.29475	1.80438	0.00218129	0.0168772	0.679628	0.0901277	FLT_LAR	Adam5	a disintegrin and metallopeptidase domain 5	11499
ENSMUSG00000025473	18	18	10	8	0.0880815	7.73591	7.56933	8.18376	7.98158	236.75	193.2	No	226.006	187.188	204.44	-0.276501	0.161152	2.95583	5.17067e-07	8.53857e-06	-0.115349	-0.437652	GC_LAR	Adam8	a disintegrin and metallopeptidase domain 8	11501
ENSMUSG00000006403	18	18	10	8	0.424153	5.71635	6.37361	6.68271	7.38216	47.875	165.4	No	45.4441	170.246	114.778	1.90047	0.580672	9.65457	2.22045e-16	9.41863e-15	2.48114	1.3198	FLT_LAR	Adamts4	a disintegrin-like and metallopeptidase (reprolysin type) with thrombospondin type 1 motif, 4	240913
ENSMUSG00000031994	18	18	10	8	0.0903349	8.57611	8.77141	8.76719	9.0281	427.375	497.2	No	380.744	457.957	423.64	0.259248	0.181445	2.03446	0.000550088	0.00501147	0.440693	0.0778033	FLT_LAR	Adamts8	a disintegrin-like and metallopeptidase (reprolysin type) with thrombospondin type 1 motif, 8	30806
ENSMUSG00000030022	18	18	10	8	0.115505	9.37171	9.53871	9.47642	9.70091	664.25	839.1	No	660.505	853.634	767.799	0.370316	0.284806	1.66965	0.00457459	0.0318105	0.655122	0.0855107	FLT_LAR	Adamts9	a disintegrin-like and metallopeptidase (reprolysin type) with thrombospondin type 1 motif, 9	101401
ENSMUSG00000091636	18	11	4	7	0.193548	0.57856	0.504839	5.54122	5.33669	2.5	1.1	No	2.35746	0.832999	1.51054	-1.33101	0.897816	2.29355	9.81473e-05	0.00105354	-0.433199	-2.22883	GC_LAR	Akain1	A kinase (PRKA) anchor inhibitor 1	320722
ENSMUSG00000038587	18	18	10	8	0.0900075	11.4247	11.5477	11.4281	11.6068	2940.62	3344.8	No	2723.06	3072.35	2917.11	0.173453	0.120438	2.06509	0.000452974	0.00420797	0.293891	0.0530149	FLT_LAR	Akap12	A kinase (PRKA) anchor protein (gravin) 12	83397
ENSMUSG00000018428	18	18	10	8	0.0858775	12.164	12.3497	12.1358	12.407	4921.25	5850.2	No	4483.15	5401.69	4993.45	0.268036	0.113014	5.58195	2.22045e-16	9.41863e-15	0.381049	0.155022	FLT_LAR	Akap1	A kinase (PRKA) anchor protein 1	11640
ENSMUSG00000022016	18	18	10	8	0.0781203	12.3327	12.448	12.3213	12.4902	5414.12	6006.6	No	5095.14	5702.08	5432.33	0.161858	0.0943914	2.92729	6.64727e-07	1.07646e-05	0.25625	0.0674669	FLT_LAR	Akap11	A kinase (PRKA) anchor protein 11	219181
ENSMUSG00000036551	18	9	3	6	0.166667	-0.539212	-0.581011	5.43127	5.28603	1	0.4	No	1.48606	0.403158	0.884447	-1.49852	1.19119	1.87808	0.00142502	0.0116046	-0.307322	-2.68971	GC_LAR	Akap14	A kinase (PRKA) anchor protein 14	434756
ENSMUSG00000078504	18	8	7	1	0.222222	-0.910153	-0.876804	5.23537	5.39015	0.125	0.8	No	0.128654	0.881449	0.546874	1.7879	1.30155	2.37204	5.61517e-05	0.000638725	3.08945	0.486356	FLT_LAR	Aadacl4fm5	AADACL4 family member 5	329993
ENSMUSG00000019986	18	18	10	8	0.0970038	9.15437	9.28032	9.29109	9.46273	623.625	709.3	No	561.412	645.601	608.184	0.197404	0.141137	1.95307	0.00091026	0.00783342	0.338541	0.0562667	FLT_LAR	Ahi1	Abelson helper integration site 1	52906
ENSMUSG00000000686	18	18	10	8	0.0973607	6.47552	6.32918	7.30443	7.14982	105.375	86.2	No	96.2113	80.2459	87.3417	-0.27378	0.223742	1.51279	0.0101946	0.0631697	-0.0500382	-0.497521	GC_LAR	Abhd15	abhydrolase domain containing 15	67477
ENSMUSG00000038459	18	18	10	8	0.079852	12.2396	12.4082	12.2155	12.4618	5060.88	5926	No	4726.21	5586.19	5203.98	0.240914	0.0903142	7.06553	2.22045e-16	9.41863e-15	0.331229	0.1506	FLT_LAR	Abhd17c	abhydrolase domain containing 17C	70178
ENSMUSG00000039202	18	18	10	8	0.0860383	14.9159	15.0146	14.8914	15.0373	33139.4	36314	No	30587.5	33967.5	32465.3	0.151136	0.115371	1.70877	0.00370804	0.0266369	0.266506	0.0357647	FLT_LAR	Abhd2	abhydrolase domain containing 2	54608
ENSMUSG00000025277	18	18	10	8	0.0865319	9.95662	10.0706	10.0281	10.1868	1061.25	1198.8	No	976.324	1113.7	1052.64	0.189197	0.127793	2.18202	0.000210797	0.00210629	0.31699	0.0614047	FLT_LAR	Abhd6	abhydrolase domain containing 6	66082
ENSMUSG00000007950	18	18	10	8	0.09098	8.9508	9.04949	9.11905	9.25141	527.25	603.7	No	487.481	552.94	523.847	0.180062	0.151958	1.40018	0.017411	0.0994118	0.332019	0.0281041	FLT_LAR	Abhd8	abhydrolase domain containing 8	64296
ENSMUSG00000018381	18	18	10	8	0.0931287	9.43642	9.57674	9.54156	9.73439	732.25	847.7	No	684.23	797.05	746.908	0.218474	0.15572	1.95724	0.000887477	0.00766243	0.374194	0.0627532	FLT_LAR	Abi3	ABI family member 3	66610
ENSMUSG00000026782	18	18	10	8	0.0830867	9.92047	10.0043	10.0018	10.1197	1043.88	1124.3	No	958.387	1045.54	1006.8	0.122218	0.0900484	1.84252	0.00175316	0.0138791	0.212267	0.03217	FLT_LAR	Abi2	abl interactor 2	329165
ENSMUSG00000062480	18	18	10	8	0.183746	3.90291	3.53938	6.24059	5.87109	23.125	9.8	No	22.2674	9.08952	14.9463	-1.2861	0.471947	7.48047	2.22045e-16	9.41863e-15	-0.814149	-1.75804	GC_LAR	Acat3	acetyl-Coenzyme A acetyltransferase 3	224530
ENSMUSG00000085111	18	18	10	8	0.110526	3.18606	3.32203	5.84315	5.99045	8.25	12.4	No	7.70572	11.8219	9.99249	0.618335	0.365431	2.85431	1.25054e-06	1.9403e-05	0.983766	0.252905	FLT_LAR	Ascl4	achaete-scute family bHLH transcription factor 4	67341
ENSMUSG00000028333	18	18	10	8	0.0987433	10.5204	10.3942	10.621	10.4428	1685.5	1444.7	No	1525.02	1333.25	1418.48	-0.195159	0.126849	2.37901	5.33919e-05	0.000611972	-0.0683106	-0.322008	GC_LAR	Anp32b	acidic (leucine-rich) nuclear phosphoprotein 32 family, member B	67628
ENSMUSG00000108105	18	18	10	8	0.106613	5.38672	5.01857	6.7913	6.42376	52.625	32	No	52.5117	29.5402	39.7497	-0.80443	0.318997	6.38786	2.22045e-16	9.41863e-15	-0.485433	-1.12343	GC_LAR	Gm5340	acidic ribosomal phosphoprotein P0 pseudogene	384710
ENSMUSG00000020704	18	18	10	8	0.114629	5.33702	5.54731	6.58042	6.80566	41.625	58.3	No	37.1179	52.9497	45.9133	0.491147	0.263587	3.47599	3.56418e-09	7.7982e-08	0.754734	0.22756	FLT_LAR	Asic2	acid-sensing (proton-gated) ion channel 2	11418
ENSMUSG00000028008	18	18	10	8	0.163636	1.52549	1.45915	5.64933	5.5435	4	2.3	No	3.666	2.24744	2.87791	-0.770687	0.537219	2.07623	0.000421816	0.00394781	-0.233468	-1.30791	GC_LAR	Asic5	acid-sensing (proton-gated) ion channel family member 5	58170
ENSMUSG00000022622	18	12	5	7	0.206897	0.852017	0.744137	5.57094	5.36428	2.5	0.9	No	3.50735	0.936528	2.07911	-1.76729	0.93581	3.66091	5.0582e-10	1.22831e-08	-0.831477	-2.7031	GC_LAR	Acr	acrosin prepropeptide	11434
ENSMUSG00000031972	18	18	10	8	0.270492	7.09143	7.24068	7.63781	7.82384	146	224.8	No	138.389	217.49	182.334	0.652448	0.456738	1.99175	0.000718093	0.0063532	1.10919	0.19571	FLT_LAR	Acta1	actin alpha 1, skeletal muscle	11459
ENSMUSG00000038827	18	18	10	8	0.0813622	8.84771	8.92531	9.03488	9.13887	485.375	524.9	No	456.55	494.866	477.837	0.115911	0.0973448	1.41378	0.0163494	0.0944789	0.213256	0.018566	FLT_LAR	Abitram	actin binding transcription modulator	230234
ENSMUSG00000025083	18	18	10	8	0.0844142	8.78187	8.92378	8.95915	9.15027	473.5	531	No	432.488	498.466	469.143	0.190648	0.0971101	3.87037	4.93023e-11	1.32441e-09	0.287758	0.0935375	FLT_LAR	Afap1l2	actin filament associated protein 1-like 2	226250
ENSMUSG00000059430	18	18	10	8	0.12451	15.0179	14.6799	15.097	14.5992	40946.5	29379.2	No	37441.1	26536.4	31382.9	-0.496645	0.258905	3.70871	3.00574e-10	7.47853e-09	-0.23774	-0.75555	GC_LAR	Actg2	actin, gamma 2, smooth muscle, enteric	11468
ENSMUSG00000062825	18	18	10	8	0.105536	16.2713	16.3853	16.2412	16.4042	85871	99286.9	No	78093.8	90834.9	85172.2	0.218028	0.180194	1.45452	0.013504	0.0803125	0.398222	0.0378342	FLT_LAR	Actg1	actin, gamma, cytoplasmic 1	11465
ENSMUSG00000042895	18	18	10	8	0.102564	3.3775	3.25099	6.01734	5.87464	12.75	9.3	No	12.1639	8.58928	10.178	-0.475211	0.313091	2.31302	8.55878e-05	0.000931267	-0.16212	-0.788303	GC_LAR	Abra	actin-binding Rho activating protein	223513
ENSMUSG00000052374	18	18	10	8	0.110155	4.97615	4.79599	6.55327	6.37424	37.375	28.2	No	36.0496	26.6521	30.8288	-0.43205	0.279485	2.39994	4.58567e-05	0.000534332	-0.152565	-0.711535	GC_LAR	Actn2	actinin alpha 2	11472
ENSMUSG00000038774	18	18	10	8	0.080122	11.9746	12.0545	11.979	12.0954	4208.62	4537.3	No	3986.62	4316.82	4170.07	0.114767	0.0801464	2.0438	0.000518569	0.00475352	0.194914	0.0346209	FLT_LAR	Ascc3	activating signal cointegrator 1 complex subunit 3	77987
ENSMUSG00000027104	18	18	10	8	0.0894787	11.4832	11.5596	11.4986	11.6099	3123.38	3265.8	No	2843.32	3055.86	2961.4	0.101721	0.0784637	1.6785	0.00436379	0.0305548	0.180185	0.0232572	FLT_LAR	Atf2	activating transcription factor 2	11909
ENSMUSG00000039200	18	18	10	8	0.122222	3.90829	3.74828	6.17487	6.01226	17.75	12.8	No	18.7951	12.4076	15.2465	-0.539549	0.349329	2.44605	3.26548e-05	0.000391604	-0.190219	-0.888878	GC_LAR	Atf7ip2	activating transcription factor 7 interacting protein 2	75329
ENSMUSG00000052155	18	18	10	8	0.0834158	11.1203	11.2384	11.1345	11.3055	2390	2633.9	No	2190.84	2470.4	2346.15	0.171498	0.0917873	3.47736	3.51406e-09	7.69494e-08	0.263285	0.0797105	FLT_LAR	Acvr2a	activin receptor IIA	11480
ENSMUSG00000022602	18	18	10	8	0.262332	5.20958	5.33824	6.54766	6.69882	41	56.4	No	36.3351	54.1777	46.2477	0.560787	0.448991	1.54	0.00891325	0.0565797	1.00978	0.111795	FLT_LAR	Arc	activity regulated cytoskeletal-associated protein	11838
ENSMUSG00000051149	18	18	10	8	0.293445	8.28754	8.01602	8.65788	8.31107	445.25	264.7	No	511.556	268.789	376.685	-0.927306	0.470032	3.91439	2.97549e-11	8.13434e-10	-0.457274	-1.39734	GC_LAR	Adnp	activity-dependent neuroprotective protein	11538
ENSMUSG00000020333	18	18	10	8	0.0873132	7.36736	7.52084	7.82417	8.00974	169.625	205.6	No	159.486	191.007	176.998	0.2592	0.113931	5.16638	2.22045e-16	9.41863e-15	0.373132	0.145269	FLT_LAR	Acsl6	acyl-CoA synthetase long-chain family member 6	216739
ENSMUSG00000033533	18	12	6	6	0.44	1.88577	1.6796	5.70503	5.4503	7	1.9	No	7.55948	1.90457	4.41786	-1.99169	0.964368	4.20464	9.28591e-13	2.90726e-11	-1.02732	-2.95606	GC_LAR	Acsm1	acyl-CoA synthetase medium-chain family member 1	117147
ENSMUSG00000021620	18	18	10	8	0.171171	2.51567	2.41207	5.80056	5.69164	7.75	4.9	No	7.37312	4.57652	5.81945	-0.702386	0.51023	1.91331	0.00115665	0.00967208	-0.192156	-1.21262	GC_LAR	Acot12	acyl-CoA thioesterase 12	74156
ENSMUSG00000021226	18	18	10	8	0.0926366	8.10196	8.37417	8.3557	8.70684	298.375	392.8	No	265.326	357.691	316.64	0.423692	0.190607	4.89706	2.22045e-16	9.41863e-15	0.614299	0.233084	FLT_LAR	Acot2	acyl-CoA thioesterase 2	171210
ENSMUSG00000021228	18	13	7	6	0.464789	1.74118	1.5814	5.64868	5.47562	6.375	2	No	6.61726	1.97228	4.03671	-1.76647	0.933352	3.56638	1.38894e-09	3.1902e-08	-0.833117	-2.69982	GC_LAR	Acot3	acyl-CoA thioesterase 3	171281
ENSMUSG00000052392	18	18	10	8	0.0799926	8.07375	8.22189	8.36991	8.557	266.375	325.7	No	264.665	312.147	291.044	0.249268	0.149592	2.75161	2.96774e-06	4.34086e-05	0.39886	0.0996763	FLT_LAR	Acot4	acyl-CoA thioesterase 4	171282
ENSMUSG00000043487	18	18	10	8	0.0835443	7.7704	7.87897	8.13912	8.27388	224.5	254.9	No	213.247	240.956	228.641	0.178043	0.0806286	4.86615	2.22045e-16	9.41863e-15	0.258671	0.097414	FLT_LAR	Acot6	acyl-CoA thioesterase 6	217700
ENSMUSG00000060317	18	13	5	8	0.294118	1.43648	1.27491	5.68648	5.38734	4.625	1.4	No	4.94531	1.22845	2.88039	-1.92641	0.788589	6.0981	2.22045e-16	9.41863e-15	-1.13782	-2.715	GC_LAR	Acnat2	acyl-coenzyme A amino acid N-acyltransferase 2	209186
ENSMUSG00000029456	18	18	10	8	0.0953004	9.73784	9.94236	9.80006	10.0856	904.25	1110.8	No	831.768	1026.19	939.779	0.300456	0.130395	5.2706	2.22045e-16	9.41863e-15	0.430852	0.170061	FLT_LAR	Acad10	acyl-Coenzyme A dehydrogenase family, member 10	71985
ENSMUSG00000020777	18	18	10	8	0.0888124	13.617	13.7621	13.5845	13.7973	13624.4	15493.2	No	12424	14418.9	13532.3	0.214685	0.143059	2.23785	0.000144387	0.00149969	0.357744	0.0716255	FLT_LAR	Acox1	acyl-Coenzyme A oxidase 1, palmitoyl	11430
ENSMUSG00000021322	18	18	10	8	0.0938547	6.5905	6.47469	7.36999	7.24307	108.75	92	No	102.097	87.5674	94.0249	-0.227839	0.169411	1.81495	0.00205399	0.0159958	-0.0584281	-0.39725	GC_LAR	Aoah	acyloxyacyl hydrolase	27052
ENSMUSG00000008822	18	18	10	8	0.100679	8.4605	8.27689	8.77243	8.53495	381.625	328.4	No	383.525	314.578	345.221	-0.282214	0.232345	1.48115	0.0118891	0.0720938	-0.0498696	-0.514559	GC_LAR	Acyp1	acylphosphatase 1, erythrocyte (common) type	66204
ENSMUSG00000036040	18	18	10	8	0.102307	6.57854	6.9928	7.23365	7.69184	100.125	149.6	No	95.9946	148.313	125.06	0.623204	0.332748	3.43409	5.47359e-09	1.16937e-07	0.955953	0.290456	FLT_LAR	Adamtsl2	ADAMTS-like 2	77794
ENSMUSG00000070469	18	18	10	8	0.101289	9.22374	9.39755	9.3386	9.57803	669.25	783.6	No	595.891	705.985	657.054	0.240812	0.176114	1.86179	0.00156767	0.0126041	0.416925	0.0646979	FLT_LAR	Adamtsl3	ADAMTS-like 3	269959
ENSMUSG00000043822	18	18	10	8	0.076032	8.64004	8.79219	8.83298	9.03972	408.125	485	No	394.915	474.904	439.353	0.264327	0.204956	1.64998	0.00507642	0.0347036	0.469283	0.0593712	FLT_LAR	Adamtsl5	ADAMTS-like 5	66548
ENSMUSG00000040760	18	18	10	8	0.0793069	11.0752	11.2469	11.0773	11.3248	2243.5	2655	No	2092.32	2507.35	2322.89	0.259563	0.0806864	10.2769	2.22045e-16	9.41863e-15	0.34025	0.178877	FLT_LAR	Appl1	adaptor protein, phosphotyrosine interaction, PH domain and leucine zipper containing 1	72993
ENSMUSG00000030000	18	18	10	8	0.110895	7.36383	7.53339	7.81787	8.02259	175.875	220	No	160.625	197.029	180.85	0.291408	0.184921	2.4793	2.54726e-05	0.000313479	0.476328	0.106487	FLT_LAR	Add2	adducin 2 (beta)	11519
ENSMUSG00000042429	18	18	10	8	0.101754	8.53169	8.84422	8.69494	9.11837	380.125	528.3	No	349.638	507.543	437.363	0.533186	0.200589	6.9491	2.22045e-16	9.41863e-15	0.733775	0.332597	FLT_LAR	Adora1	adenosine A1 receptor	11539
ENSMUSG00000027951	18	18	10	8	0.0829168	11.6425	11.7098	11.6569	11.7547	3393.62	3646.9	No	3173.18	3394.48	3296.12	0.0964265	0.0800295	1.44899	0.0138627	0.0820008	0.176456	0.016397	FLT_LAR	Adar	adenosine deaminase, RNA-specific	56417
ENSMUSG00000020262	18	18	10	8	0.096186	9.09302	9.29926	9.21651	9.49676	556.25	690.3	No	534.103	654.229	600.84	0.291671	0.129609	5.02215	2.22045e-16	9.41863e-15	0.42128	0.162062	FLT_LAR	Adarb1	adenosine deaminase, RNA-specific, B1	110532
ENSMUSG00000027259	18	18	10	8	0.0806353	8.68491	8.76942	8.89247	9.00441	433.5	471.7	No	404.889	443.794	426.503	0.128609	0.0706926	3.30503	1.98954e-08	3.98499e-07	0.199302	0.0579167	FLT_LAR	Adal	adenosine deaminase-like	75894
ENSMUSG00000070385	18	10	4	6	0.3	0.283572	0.192968	5.49591	5.31561	1.875	0.5	No	2.68611	0.550271	1.49953	-2.15692	1.13948	3.61744	8.07375e-10	1.90432e-08	-1.01744	-3.2964	GC_LAR	Ampd1	adenosine monophosphate deaminase 1	229665
ENSMUSG00000005580	18	18	10	8	0.0839264	10.086	10.2003	10.1481	10.3097	1136.5	1268.9	No	1079.53	1205	1149.23	0.157717	0.121405	1.68049	0.00431777	0.0302889	0.279122	0.0363121	FLT_LAR	Adcy9	adenylate cyclase 9	11515
ENSMUSG00000029778	18	18	10	8	0.0994523	9.0122	9.20229	9.14653	9.40542	583.875	683.2	No	517.542	623.023	576.143	0.263918	0.200999	1.71443	0.00359572	0.0259577	0.464918	0.0629188	FLT_LAR	Adcyap1r1	adenylate cyclase activating polypeptide 1 receptor 1	11517
ENSMUSG00000028527	18	18	10	8	0.096169	9.10866	8.90248	9.33588	9.05911	617.25	519	No	609.565	487.783	541.908	-0.318041	0.25023	1.62343	0.00583231	0.0391986	-0.0678114	-0.568271	GC_LAR	Ak4	adenylate kinase 4	11639
ENSMUSG00000041323	18	18	10	8	0.116834	5.4091	5.21388	6.74663	6.55023	51.125	38.7	No	46.9707	34.9253	40.2788	-0.41155	0.186065	4.95563	2.22045e-16	9.41863e-15	-0.225485	-0.597615	GC_LAR	Ak7	adenylate kinase 7	78801
ENSMUSG00000091415	18	13	6	7	0.172414	0.903243	0.822883	5.55895	5.40455	2.125	1.2	No	3.4413	1.27111	2.23564	-1.21564	0.918961	1.91801	0.00112462	0.00944628	-0.296681	-2.1346	GC_LAR	Ak9	adenylate kinase 9	633979
ENSMUSG00000039546	18	18	10	8	0.106457	4.7774	4.92101	6.36021	6.50847	28	34.9	No	25.3127	32.5243	29.3191	0.323561	0.188053	3.01801	2.96807e-07	5.08185e-06	0.511615	0.135508	FLT_LAR	Ajap1	adherens junction associated protein 1	230959
ENSMUSG00000034730	18	18	10	8	0.106049	5.91572	6.1003	6.8987	7.08744	61.125	78.4	No	59.5678	73.7755	67.461	0.3122	0.233811	1.76666	0.00269707	0.0202831	0.546011	0.0783895	FLT_LAR	Adgrb1	adhesion G protein-coupled receptor B1	107831
ENSMUSG00000044017	18	18	10	8	0.096553	9.00322	9.16144	9.14876	9.36295	558.75	646.7	No	507.248	598.269	557.815	0.234398	0.160955	2.11128	0.00033635	0.00321077	0.395353	0.0734436	FLT_LAR	Adgrd1	adhesion G protein-coupled receptor D1	243277
ENSMUSG00000032915	18	18	10	8	0.111258	5.34518	5.16849	6.71186	6.53682	48.875	36.4	No	45.9732	34.3378	39.5091	-0.428544	0.242955	3.12995	1.06326e-07	1.94185e-06	-0.185589	-0.671499	GC_LAR	Adgre4	adhesion G protein-coupled receptor E4	52614
ENSMUSG00000041293	18	18	10	8	0.114167	7.09861	7.35798	7.60959	7.91275	144.75	196.9	No	135.281	179.229	159.697	0.403288	0.24181	2.75507	2.88406e-06	4.23022e-05	0.645098	0.161478	FLT_LAR	Adgrf1	adhesion G protein-coupled receptor F1	77596
ENSMUSG00000057899	18	17	9	8	0.236842	2.05156	1.92129	5.74201	5.56812	6	2.8	No	6.23892	2.95616	4.41516	-1.11041	0.643624	2.96642	4.70782e-07	7.84606e-06	-0.466789	-1.75404	GC_LAR	Adgrf2	adhesion G protein-coupled receptor F2	435529
ENSMUSG00000039116	18	18	10	8	0.0809965	8.5455	8.69047	8.75805	8.94858	394.25	451.3	No	371.374	424.293	400.774	0.188931	0.134871	1.95517	0.000898749	0.00774449	0.323802	0.0540604	FLT_LAR	Adgrg6	adhesion G protein-coupled receptor G6	215798
ENSMUSG00000022755	18	18	10	8	0.0833879	13.6974	13.7877	13.6801	13.8128	14273	15321.7	No	13182.6	14427.7	13874.3	0.130122	0.105559	1.51405	0.0101315	0.0628418	0.235681	0.0245631	FLT_LAR	Adgrg7	adhesion G protein-coupled receptor G7	239853
ENSMUSG00000050947	18	18	10	8	0.0810494	9.86128	9.96723	9.94109	10.0898	981.625	1090.1	No	915.605	1020.81	974.055	0.153919	0.0817598	3.53678	1.89595e-09	4.26897e-08	0.235679	0.0721591	FLT_LAR	Amigo1	adhesion molecule with Ig like domain 1	229715
ENSMUSG00000039041	18	18	10	8	0.0879475	10.7909	10.8743	10.8263	10.946	1903.12	2075.1	No	1754.45	1913.75	1842.95	0.124453	0.0987788	1.58378	0.00715134	0.0467632	0.223232	0.0256742	FLT_LAR	Adrm1	adhesion regulating molecule 1 26S proteasome ubiquitin receptor	56436
ENSMUSG00000022878	18	18	10	8	0.185671	9.91249	9.17034	10.1884	9.16397	1467.62	763.2	No	1255.64	746.096	972.558	-0.751525	0.509937	2.18973	0.000200167	0.00201385	-0.241588	-1.26146	GC_LAR	Adipoq	adiponectin, C1Q and collagen domain containing	11450
ENSMUSG00000025236	18	18	10	8	0.0676659	10.0339	10.1604	10.097	10.2736	1056	1216.8	No	1032.02	1190.8	1120.23	0.207212	0.141514	2.12959	0.000298412	0.00288209	0.348725	0.0656976	FLT_LAR	Adpgk	ADP-dependent glucokinase	72141
ENSMUSG00000074582	18	18	10	8	0.0851407	12.2187	12.3466	12.205	12.3922	5086.38	5714.7	No	4716.86	5340.27	5063.2	0.178676	0.114967	2.4035	4.46803e-05	0.000522244	0.293643	0.0637091	FLT_LAR	Arfgef2	ADP-ribosylation factor guanine nucleotide-exchange factor 2 (brefeldin A-inhibited)	99371
ENSMUSG00000025870	18	18	10	8	0.0765335	8.16722	8.09282	8.5011	8.40633	305.5	288.7	No	293.564	270.826	280.932	-0.109333	0.092313	1.41094	0.0165666	0.0954819	-0.0170199	-0.201646	GC_LAR	Arl10	ADP-ribosylation factor-like 10	56795
ENSMUSG00000043157	18	18	10	8	0.136775	5.91786	5.70534	7.01025	6.78731	71.75	53	No	68.4114	49.6221	57.9729	-0.445912	0.212619	4.42102	5.9952e-14	2.07458e-12	-0.233294	-0.658531	GC_LAR	Arl11	ADP-ribosylation factor-like 11	219144
ENSMUSG00000057594	18	18	10	8	0.101582	8.44025	8.35549	8.72943	8.61852	381.375	352.5	No	357.882	324.311	339.231	-0.136101	0.111348	1.49793	0.0109613	0.0671961	-0.0247521	-0.247449	GC_LAR	Arl16	ADP-ribosylation factor-like 16	70317
ENSMUSG00000049866	18	18	10	8	0.0851453	8.03286	7.89788	8.40727	8.23818	299	252.9	No	273.35	234.357	251.687	-0.231086	0.121623	3.64833	5.79388e-10	1.39027e-08	-0.109464	-0.352709	GC_LAR	Arl4c	ADP-ribosylation factor-like 4C	320982
ENSMUSG00000017418	18	18	10	8	0.0785685	11.1917	11.3411	11.1965	11.4079	2392.62	2788.8	No	2283.53	2747.47	2541.27	0.266837	0.163019	2.65695	6.41333e-06	8.81674e-05	0.429856	0.103818	FLT_LAR	Arl5b	ADP-ribosylation factor-like 5B	75869
ENSMUSG00000038352	18	18	10	8	0.106072	6.27043	6.06323	7.20484	6.98263	86	67.9	No	85.3269	64.6275	73.8273	-0.383022	0.199534	3.70318	3.19353e-10	7.91579e-09	-0.183488	-0.582556	GC_LAR	Arl5c	ADP-ribosylation factor-like 5C	217151
ENSMUSG00000026960	18	18	10	8	0.0818078	9.17165	9.23461	9.32419	9.40984	612.75	651.5	No	571.052	609.087	592.183	0.0918716	0.0639593	2.06398	0.000456199	0.00423345	0.155831	0.0279123	FLT_LAR	Arl6ip6	ADP-ribosylation factor-like 6 interacting protein 6	65103
ENSMUSG00000031448	18	15	8	7	0.275	1.13625	1.06803	5.57207	5.46337	3	1.6	No	3.34651	1.62847	2.39204	-0.938994	0.759776	1.59449	0.00677082	0.0445722	-0.179218	-1.69877	GC_LAR	Adprhl1	ADP-ribosylhydrolase like 1	234072
ENSMUSG00000030651	18	18	10	8	0.0968468	4.68676	4.42046	6.47155	6.20907	30.375	20.1	No	31.5133	19.1445	24.6417	-0.679565	0.275513	6.1188	2.22045e-16	9.41863e-15	-0.404053	-0.955078	GC_LAR	Art2b	ADP-ribosyltransferase 2b	11872
ENSMUSG00000030217	18	18	10	8	0.0990359	5.6799	5.8491	6.768	6.94523	58.125	67.6	No	49.7674	61.2099	56.1243	0.268684	0.212906	1.64487	0.0052147	0.035538	0.481591	0.0557777	FLT_LAR	Art4	ADP-ribosyltransferase 4	109978
ENSMUSG00000045318	18	18	10	8	0.120075	4.59801	4.72035	6.30095	6.41874	25	33.3	No	22.5759	29.3971	26.3655	0.380579	0.281521	1.85488	0.00163197	0.0130322	0.6621	0.0990577	FLT_LAR	Adra2c	adrenergic receptor, alpha 2c	11553
ENSMUSG00000020473	18	18	10	8	0.0970112	10.3679	10.524	10.399	10.6243	1429.75	1686.8	No	1307.16	1556.95	1445.93	0.251133	0.180678	1.91866	0.00112022	0.00941839	0.431811	0.0704548	FLT_LAR	Aebp1	AE binding protein 1	11568
ENSMUSG00000030232	18	18	10	8	0.0793838	11.2088	11.2883	11.2311	11.3462	2477.62	2678.8	No	2344.1	2535.66	2450.52	0.112989	0.0755205	2.23153	0.000150776	0.00155928	0.188509	0.0374681	FLT_LAR	Aebp2	AE binding protein 2	11569
ENSMUSG00000049470	18	18	10	8	0.0840495	13.4661	13.5518	13.4519	13.578	12117.8	12904.4	No	11207.8	12192.3	11754.8	0.120951	0.0812336	2.20987	0.000174732	0.00177767	0.202184	0.0397169	FLT_LAR	Aff4	AF4/FMR2 family, member 4	93736
ENSMUSG00000029369	18	18	10	8	0.104065	6.26508	6.58603	7.03768	7.40252	86.875	115	No	73.2155	105.075	90.9155	0.488275	0.229321	4.54232	1.22125e-14	4.5236e-13	0.717596	0.258954	FLT_LAR	Afm	afamin	280662
ENSMUSG00000024527	18	18	10	8	0.0713059	12.5077	12.5896	12.5036	12.6225	5951.75	6536.4	No	5765.49	6291.56	6057.75	0.12626	0.100507	1.57221	0.00758364	0.0492328	0.226768	0.0257529	FLT_LAR	Afg3l2	AFG3-like AAA ATPase 2	69597
ENSMUSG00000040706	18	16	8	8	0.179487	1.98139	1.87466	5.72614	5.5542	5.625	3.3	No	5.54672	2.84285	4.04457	-0.891289	0.582615	2.37288	5.58118e-05	0.000635684	-0.308673	-1.4739	GC_LAR	Agmat	agmatine ureohydrolase (agmatinase)	75986
ENSMUSG00000069833	18	18	10	8	0.0863362	17.1589	17.3426	17.1034	17.3799	152501	180821	No	146072	171848	160392	0.234448	0.153734	2.3093	8.78647e-05	0.000953674	0.388182	0.0807148	FLT_LAR	Ahnak	AHNAK nucleoprotein (desmoyokin)	66395
ENSMUSG00000026272	18	18	10	8	0.3	2.80548	2.58014	5.91212	5.68012	12	4.4	No	11.1586	4.33577	7.36812	-1.41205	0.528844	7.20193	2.22045e-16	9.41863e-15	-0.883203	-1.94089	GC_LAR	Agxt	alanine-glyoxylate aminotransferase	11611
ENSMUSG00000039062	18	18	10	8	0.140912	9.48649	9.66859	9.57411	9.82286	784.75	973.2	No	730.073	938.703	845.978	0.361694	0.299832	1.43871	0.0145515	0.0855362	0.661526	0.0618623	FLT_LAR	Anpep	alanyl (membrane) aminopeptidase	16790
ENSMUSG00000023938	18	18	10	8	0.0946506	9.10228	9.29354	9.22808	9.48801	581.75	717.9	No	532.184	655.861	600.894	0.297394	0.124733	5.65488	2.22045e-16	9.41863e-15	0.422126	0.172661	FLT_LAR	Aars2	alanyl-tRNA synthetase 2, mitochondrial	224805
ENSMUSG00000029368	18	18	10	8	0.419527	9.8534	8.80515	10.186	8.79673	1920.12	465.2	No	1993	459.77	1141.2	-2.1161	0.620923	11.2526	2.22045e-16	9.41863e-15	-1.49518	-2.73702	GC_LAR	Alb	albumin	11657
ENSMUSG00000070690	18	13	8	5	0.230769	0.988646	0.927538	5.50377	5.4503	3	1.5	No	2.77661	1.43981	2.03394	-0.999123	0.82948	1.47432	0.0122857	0.0741399	-0.169643	-1.8286	GC_LAR	Albfm1	albumin superfamily member 1	622307
ENSMUSG00000037797	18	10	4	6	0.368421	0.879231	0.7591	5.54431	5.33426	3.625	0.9	No	3.41863	0.810742	1.9698	-2.07916	1.06244	3.91545	2.93923e-11	8.04357e-10	-1.01672	-3.14161	GC_LAR	Adh4	alcohol dehydrogenase 4 (class II), pi polypeptide	26876
ENSMUSG00000055301	18	18	10	8	0.114374	6.02722	5.89433	7.03592	6.90317	81.5	64.2	No	70.5804	58.0974	63.6454	-0.305042	0.203626	2.32226	8.01744e-05	0.000877448	-0.101416	-0.508668	GC_LAR	Adh7	alcohol dehydrogenase 7 (class IV), mu or sigma polypeptide	11529
ENSMUSG00000020256	18	18	10	8	0.428571	7.82283	7.85577	8.2091	8.24981	268.125	471.5	No	261.713	507.943	215.306	-0.549958	0.339738	2.6387	7.41935e-06	0.000101099	-0.21022	-0.889695	GC_LAR	Aldh1l2	aldehyde dehydrogenase 1 family, member L2	216188
ENSMUSG00000024885	18	18	10	8	0.099438	8.38312	8.25155	8.69183	8.5235	389.75	328.8	No	348.712	302.057	322.793	-0.21256	0.144524	2.18336	0.000208922	0.00209153	-0.0680357	-0.357085	GC_LAR	Aldh3b1	aldehyde dehydrogenase 3 family, member B1	67689
ENSMUSG00000037542	18	17	9	8	0.346405	3.01158	2.6711	5.99992	5.64647	13.875	4.2	No	15.6462	4.23279	9.3054	-1.87633	0.657919	8.01076	2.22045e-16	9.41863e-15	-1.21841	-2.53425	GC_LAR	Aldh8a1	aldehyde dehydrogenase 8 family, member A1	237320
ENSMUSG00000079554	18	18	10	8	0.107784	3.23265	3.12604	5.97826	5.85619	10.375	8.4	No	11.6927	7.95765	9.61769	-0.410974	0.358002	1.52885	0.00941983	0.0593051	-0.0529725	-0.768976	GC_LAR	Aox2	aldehyde oxidase 2	213043
ENSMUSG00000064294	18	18	10	8	0.111765	5.14389	4.96641	6.60919	6.44746	45.125	31.9	No	39.9845	29.6017	34.2163	-0.47059	0.241496	3.88463	4.18894e-11	1.13572e-09	-0.229094	-0.712086	GC_LAR	Aox3	aldehyde oxidase 3	71724
ENSMUSG00000061758	18	18	10	8	0.0991444	8.96243	8.84842	9.18401	9.03213	554.875	491.1	No	513.524	454.058	480.487	-0.180314	0.0910188	3.95008	1.96787e-11	5.48231e-10	-0.0892955	-0.271333	GC_LAR	Akr1b10	aldo-keto reductase family 1, member B10 (aldose reductase)	67861
ENSMUSG00000052131	18	18	10	8	0.132353	5.95828	6.25647	6.88746	7.20545	68.125	95.1	No	60.2986	89.5828	76.5676	0.559532	0.330017	2.83556	1.4675e-06	2.24252e-05	0.889549	0.229515	FLT_LAR	Akr1b7	aldo-keto reductase family 1, member B7	11997
ENSMUSG00000071551	18	18	10	8	0.121557	12.8234	12.6429	12.8784	12.6188	8727.75	6911.7	No	7784.53	6322.21	6972.13	-0.300282	0.176738	2.90402	8.14424e-07	1.30046e-05	-0.123544	-0.47702	GC_LAR	Akr1c19	aldo-keto reductase family 1, member C19	432720
ENSMUSG00000054757	18	10	4	6	0.542857	0.828481	0.689055	5.54539	5.3302	3.625	0.6	No	3.92162	0.705156	2.1347	-2.59427	1.18998	4.62703	3.9968e-15	1.56417e-13	-1.40429	-3.78425	GC_LAR	Akr1c20	aldo-keto reductase family 1, member C20	116852
ENSMUSG00000038641	18	15	8	7	0.317308	2.47828	2.22825	5.84337	5.55235	9	3.2	No	10.472	3.10627	6.37993	-1.72326	0.773952	4.90062	2.22045e-16	9.41863e-15	-0.949305	-2.49721	GC_LAR	Akr1d1	aldo-keto reductase family 1, member D1	208665
ENSMUSG00000063129	18	10	4	6	0.272727	0.249765	0.180497	5.48568	5.32125	1.875	0.7	No	2.2148	0.639135	1.33943	-1.64177	1.06646	2.42759	3.7436e-05	0.000443283	-0.575313	-2.70823	GC_LAR	Aldoart2	aldolase 1 A, retrogene 2	79459
ENSMUSG00000079440	18	18	10	8	0.157236	7.58591	8.12861	7.89768	8.56458	208.5	416.4	No	189.703	379.738	295.278	1.0013	0.420211	5.44023	2.22045e-16	9.41863e-15	1.42151	0.581087	FLT_LAR	Alpi	alkaline phosphatase, intestinal	76768
ENSMUSG00000050103	18	18	10	8	0.0983149	9.00814	9.20983	9.14083	9.41554	571.5	652.5	No	506.532	614.251	566.376	0.269849	0.13747	3.83733	7.17726e-11	1.89894e-09	0.407319	0.132378	FLT_LAR	Agmo	alkylglycerol monooxygenase	319660
ENSMUSG00000024397	18	18	10	8	0.140384	7.81846	7.60777	8.2573	7.99993	279.125	204.1	No	245.397	189.133	214.139	-0.385281	0.170806	5.14677	2.22045e-16	9.41863e-15	-0.214475	-0.556087	GC_LAR	Aif1	allograft inflammatory factor 1	11629
ENSMUSG00000022347	18	14	7	7	0.558659	2.87952	2.37517	6.01498	5.5037	18.875	2.8	No	23.1616	2.87752	11.8926	-3.01319	0.961023	9.17365	2.22045e-16	9.41863e-15	-2.05217	-3.97422	GC_LAR	A1bg	alpha-1-B glycoprotein	117586
ENSMUSG00000022868	18	18	10	8	0.479947	6.48935	5.66608	7.53158	6.68194	219.5	51.3	No	224.791	49.9918	127.68	-2.16977	0.706304	9.12957	2.22045e-16	9.41863e-15	-1.46346	-2.87607	GC_LAR	Ahsg	alpha-2-HS-glycoprotein	11625
ENSMUSG00000047228	18	18	10	8	0.0941176	3.83009	3.69545	6.14438	6.00255	16	12.7	No	16.7799	12.0052	14.1273	-0.419763	0.302401	1.98691	0.000739888	0.00652526	-0.117362	-0.722164	GC_LAR	A2ml1	alpha-2-macroglobulin like 1	232400
ENSMUSG00000001751	18	18	10	8	0.0947963	9.67419	9.80949	9.7586	9.94582	917.125	1055.4	No	810.843	954.236	890.506	0.232773	0.194954	1.41803	0.0160304	0.0929624	0.427727	0.0378192	FLT_LAR	Naglu	alpha-N-acetylglucosaminidase (Sanfilippo disease IIIB)	27419
ENSMUSG00000026024	18	18	10	8	0.0946562	10.5127	10.2936	10.6374	10.3276	1651.88	1354.5	No	1538.97	1229.02	1366.77	-0.32422	0.129068	6.35212	2.22045e-16	9.41863e-15	-0.195153	-0.453288	GC_LAR	Als2	alsin Rho guanine nucleotide exchange factor	74018
ENSMUSG00000057228	18	12	4	8	0.275862	0.619377	0.544276	5.55272	5.34314	2.375	1	No	2.51329	0.897225	1.61548	-1.3915	0.908936	2.382	5.22484e-05	0.000601612	-0.48256	-2.30043	GC_LAR	Aadat	aminoadipate aminotransferase	23923
ENSMUSG00000029695	18	18	10	8	0.543497	5.20066	5.3564	6.53681	6.65796	37	86.5	No	35.1955	96.6501	29.0379	-0.55175	0.255126	4.70909	1.33227e-15	5.43214e-14	-0.296624	-0.806876	GC_LAR	Aass	aminoadipate-semialdehyde synthase	30956
ENSMUSG00000025270	18	18	10	8	0.1291	6.3627	5.90038	7.32001	6.84128	105.125	59.2	No	95.931	57.2035	74.4157	-0.756835	0.284011	7.16411	2.22045e-16	9.41863e-15	-0.472824	-1.04085	GC_LAR	Alas2	aminolevulinic acid synthase 2, erythroid	11656
ENSMUSG00000021278	18	18	10	8	0.095723	4.50562	4.64091	6.26007	6.39075	23.375	30.4	No	21.5537	27.3737	24.787	0.342022	0.284456	1.46309	0.0129639	0.0775914	0.626479	0.0575657	FLT_LAR	Amn	amnionless	93835
ENSMUSG00000029378	18	18	10	8	0.194056	8.14369	8.24541	8.43844	8.57163	297.625	384.4	No	284.111	391.479	343.76	0.462103	0.377942	1.47125	0.0124682	0.0751551	0.840045	0.0841612	FLT_LAR	Areg	amphiregulin	11839
ENSMUSG00000096569	18	16	8	8	0.823627	7.08229	7.22614	7.70388	8.04027	435	5066.1	No	380.722	6111.95	536.951	2.04097	1.40383	1.87084	0.00148687	0.0120652	3.44479	0.637137	FLT_LAR	Amy2a2	amylase 2a2	100043688
ENSMUSG00000030519	18	18	10	8	0.0842834	6.85218	6.98903	7.46476	7.62722	128.375	142.9	No	113.385	132.245	123.863	0.192634	0.149833	1.70676	0.00374866	0.0268846	0.342467	0.0428011	FLT_LAR	Apba2	amyloid beta (A4) precursor protein-binding, family A, member 2	11784
ENSMUSG00000029207	18	18	10	8	0.0786969	10.5527	10.6741	10.5878	10.7619	1561	1756.4	No	1488.12	1668.06	1588.09	0.164648	0.105642	2.41753	4.03131e-05	0.000475589	0.27029	0.0590058	FLT_LAR	Apbb2	amyloid beta (A4) precursor protein-binding, family B, member 2	11787
ENSMUSG00000014355	18	18	10	8	0.0845994	12.5228	12.6243	12.5125	12.6618	6300.12	6860.7	No	5827.96	6415.78	6154.53	0.137912	0.0855088	2.59219	1.07115e-05	0.000142081	0.223421	0.0524031	FLT_LAR	Anapc1	anaphase promoting complex subunit 1	17222
ENSMUSG00000046532	18	18	10	8	0.106784	8.85419	9.00827	9.01986	9.22654	496.625	578.5	No	461.941	540.557	505.617	0.224356	0.183178	1.49211	0.0112759	0.0688356	0.407533	0.0411781	FLT_LAR	Ar	androgen receptor	11835
ENSMUSG00000060615	18	18	10	8	0.123982	15.4975	15.0009	15.3458	14.8627	74945.2	39115.7	No	72453.1	36018.3	52211.5	-1.00832	0.580289	3.03643	2.51267e-07	4.33886e-06	-0.428027	-1.58861	GC_LAR	Ang4	angiogenin, ribonuclease A family, member 4	219033
ENSMUSG00000028553	18	15	7	8	0.439791	3.1971	2.65186	6.11428	5.54144	20.125	3	No	21.0124	3.34281	11.196	-2.69572	0.781574	11.3484	2.22045e-16	9.41863e-15	-1.91415	-3.4773	GC_LAR	Angptl3	angiopoietin-like 3	30924
ENSMUSG00000020681	18	18	10	8	0.0925215	11.4448	11.5861	11.4425	11.6468	3036.5	3479.7	No	2758.45	3192.27	2999.46	0.209856	0.146265	2.04702	0.000508104	0.00466409	0.356121	0.0635914	FLT_LAR	Ace	angiotensin I converting enzyme (peptidyl-dipeptidase A) 1	11421
ENSMUSG00000015405	18	18	10	8	0.111396	9.10971	9.32111	9.22462	9.51571	651.25	766.3	No	559.466	686.353	629.959	0.291417	0.23233	1.56278	0.00795291	0.0512757	0.523746	0.059087	FLT_LAR	Ace2	angiotensin I converting enzyme (peptidyl-dipeptidase A) 2	70008
ENSMUSG00000032826	18	18	10	8	0.104507	10.7359	10.9305	10.7411	11.0212	1831.38	2242.8	No	1694.13	2044.17	1888.6	0.270178	0.170397	2.49493	2.26399e-05	0.000281118	0.440575	0.0997817	FLT_LAR	Ank2	ankyrin 2, brain	109676
ENSMUSG00000067081	18	8	2	6	0.25	-0.545722	-0.613705	5.45334	5.25258	1.25	0.2	No	1.72471	0.198681	0.876917	-2.44884	1.22615	4.40735	7.14984e-14	2.45155e-12	-1.22269	-3.67499	GC_LAR	Asb18	ankyrin repeat and SOCS box-containing 18	208372
ENSMUSG00000020305	18	18	10	8	0.0834549	9.20479	9.1134	9.3937	9.26978	641	583.6	No	601.861	547.794	571.824	-0.136135	0.0733786	3.45019	4.6444e-09	1.00282e-07	-0.0627565	-0.209514	GC_LAR	Asb3	ankyrin repeat and SOCS box-containing 3	65257
ENSMUSG00000030509	18	18	10	8	0.0839853	10.3625	10.4478	10.417	10.5386	1429.25	1515.4	No	1303.67	1416.29	1366.24	0.11455	0.0754972	2.3048	9.06966e-05	0.000979159	0.190047	0.0390525	FLT_LAR	Asb7	ankyrin repeat and SOCS box-containing 7	117589
ENSMUSG00000014496	18	18	10	8	0.0774751	11.3367	11.4393	11.3495	11.498	2689.75	2990.5	No	2545.03	2825.95	2701.1	0.152132	0.0674623	5.06237	2.22045e-16	9.41863e-15	0.219594	0.0846696	FLT_LAR	Ankrd28	ankyrin repeat domain 28	105522
ENSMUSG00000057766	18	18	10	8	0.0901361	5.96219	5.86196	6.99517	6.89399	71.375	60.5	No	65.0797	57.1771	60.6894	-0.211977	0.150957	1.99377	0.00070918	0.00628393	-0.0610197	-0.362934	GC_LAR	Ankrd29	ankyrin repeat domain 29	225187
ENSMUSG00000020864	18	18	10	8	0.084819	11.7311	11.8227	11.736	11.8703	3718.88	3940.8	No	3383.96	3677.65	3547.12	0.118767	0.0978459	1.46964	0.0125646	0.0755994	0.216613	0.0209213	FLT_LAR	Ankrd40	ankyrin repeat domain 40	71452
ENSMUSG00000049985	18	18	10	8	0.104027	4.03691	3.88278	6.21057	6.05384	19.375	14.3	No	19.0302	13.5997	16.0132	-0.464279	0.275428	2.85797	1.21196e-06	1.88711e-05	-0.188851	-0.739707	GC_LAR	Ankrd55	ankyrin repeat domain 55	77318
ENSMUSG00000029607	18	18	10	8	0.0983607	1.75358	1.68889	5.67911	5.58195	4.25	2.7	No	4.17226	2.77244	3.39458	-0.652926	0.503863	1.69834	0.00392314	0.0279664	-0.149063	-1.15679	GC_LAR	Ankrd61	ankyrin repeat domain 61	66729
ENSMUSG00000047773	18	18	10	8	0.10828	3.05083	2.93766	5.92219	5.8084	10.625	7.2	No	9.80655	6.72594	8.0951	-0.586085	0.332568	3.13953	9.72194e-08	1.78345e-06	-0.253518	-0.918653	GC_LAR	Ankfn1	ankyrin-repeat and fibronectin type III domain containing 1	382543
ENSMUSG00000055114	18	18	10	8	0.126311	9.52787	9.21944	9.73673	9.31728	923	653.4	No	829.898	589.495	696.341	-0.493431	0.235329	4.43293	5.12923e-14	1.7938e-12	-0.258102	-0.72876	GC_LAR	Anxa13	annexin A13	69787
ENSMUSG00000111512	18	12	6	6	0.25	0.0329623	-0.00417215	5.43465	5.35714	1.625	0.7	No	1.38189	0.705631	1.00619	-1.13634	0.943639	1.47992	0.0119594	0.0724531	-0.192701	-2.07998	GC_LAR	Gm17853	annexin A7 pseudogene	100415982
ENSMUSG00000021950	18	18	10	8	0.100736	11.2921	11.562	11.2585	11.6463	2585	3475.2	No	2442.55	3288.61	2912.58	0.429087	0.204358	4.34561	1.58096e-13	5.27635e-12	0.633445	0.224729	FLT_LAR	Anxa8	annexin A8	11752
ENSMUSG00000020581	18	18	10	8	0.131899	15.4428	15.1587	15.4904	15.0972	56578.5	39286.3	No	53206.2	35865.4	43572.4	-0.568977	0.274385	4.33526	1.80522e-13	6.00197e-12	-0.294592	-0.843362	GC_LAR	Agr2	anterior gradient 2	23795
ENSMUSG00000036231	18	18	10	8	0.15	4.1581	4.02912	6.23482	6.10962	22.25	16.2	No	20.8859	15.1532	17.7011	-0.454206	0.293365	2.41068	4.23916e-05	0.000497704	-0.160841	-0.747571	GC_LAR	Agr3	anterior gradient 3	403205
ENSMUSG00000057230	18	18	10	8	0.0721589	11.9793	12.118	11.9647	12.1685	4105.62	4715.9	No	4038.68	4598.09	4349.46	0.187335	0.155803	1.43758	0.0146292	0.0859164	0.343138	0.0315326	FLT_LAR	Aak1	AP2 associated kinase 1	269774
ENSMUSG00000005871	18	18	10	8	0.0805115	13.2556	13.3648	13.2349	13.3967	10177.1	11305.2	No	9726.78	10768.7	10305.6	0.1468	0.113739	1.65888	0.00484354	0.0333729	0.260539	0.0330614	FLT_LAR	Apc	APC, WNT signaling pathway regulator	11789
ENSMUSG00000037010	18	18	10	8	0.119816	5.56533	5.32101	6.83527	6.58952	57	41.2	No	53.2454	37.3434	44.4109	-0.501912	0.199761	6.37525	2.22045e-16	9.41863e-15	-0.302151	-0.701673	GC_LAR	Apln	apelin	30878
ENSMUSG00000044338	18	18	10	8	0.091325	8.16599	7.96213	8.53097	8.27647	333	280	No	302.625	251.823	274.402	-0.266925	0.198979	1.81456	0.0020585	0.0160214	-0.0679457	-0.465904	GC_LAR	Aplnr	apelin receptor	23796
ENSMUSG00000053040	18	18	10	8	0.0910088	7.21321	7.07101	7.79067	7.62678	165.375	141.3	No	154.359	133.089	142.542	-0.218361	0.139754	2.45133	3.13994e-05	0.000377928	-0.0786065	-0.358115	GC_LAR	Aph1c	aph1 homolog C, gamma secretase subunit	68318
ENSMUSG00000052595	18	18	10	8	0.0750762	9.66978	9.81806	9.7529	9.95849	809.125	960.4	No	809.727	941.502	882.935	0.219684	0.163156	1.79935	0.00224447	0.0173202	0.382841	0.0565283	FLT_LAR	A1cf	APOBEC1 complementation factor	69865
ENSMUSG00000005681	18	18	10	8	0.401907	6.61212	5.94012	7.55711	6.8333	178.625	56.4	No	187.152	54.0978	113.233	-1.79085	0.480706	13.669	2.22045e-16	9.41863e-15	-1.31014	-2.27156	GC_LAR	Apoa2	apolipoprotein A-II	11807
ENSMUSG00000032080	18	18	10	8	0.178973	5.66208	6.37874	6.66319	7.38823	71.875	147	No	60.5795	138.738	104.001	1.19151	0.707804	2.68637	5.06093e-06	7.09853e-05	1.89931	0.483706	FLT_LAR	Apoa4	apolipoprotein A-IV	11808
ENSMUSG00000032079	18	18	10	8	0.379464	4.45901	3.93376	6.476	5.98407	40.125	12.7	No	43.0859	12.7902	26.2549	-1.75657	0.589519	8.75374	2.22045e-16	9.41863e-15	-1.16705	-2.34609	GC_LAR	Apoa5	apolipoprotein A-V	66113
ENSMUSG00000020609	18	18	10	8	0.0978977	14.3836	14.7775	14.2773	14.8582	22441.9	32049.7	No	20343	30371.9	25914.6	0.578092	0.169584	11.3774	2.22045e-16	9.41863e-15	0.747676	0.408507	FLT_LAR	Apob	apolipoprotein B	238055
ENSMUSG00000040694	18	18	10	8	0.125147	6.89109	7.02312	7.49746	7.65178	125.375	154.6	No	116.34	138.514	128.659	0.255088	0.198473	1.64889	0.00510545	0.0348568	0.453561	0.0566157	FLT_LAR	Apobec2	apolipoprotein B mRNA editing enzyme, catalytic polypeptide 2	11811
ENSMUSG00000009585	18	18	10	8	0.0754749	10.6859	10.5533	10.7806	10.5924	1736.38	1553.6	No	1722.62	1498.01	1597.84	-0.200198	0.152349	1.73292	0.00325051	0.0237921	-0.0478493	-0.352547	GC_LAR	Apobec3	apolipoprotein B mRNA editing enzyme, catalytic polypeptide 3	80287
ENSMUSG00000042759	18	18	10	8	0.079922	6.76195	6.68102	7.46778	7.37813	119.625	109.5	No	111.97	101.302	106.044	-0.148946	0.120274	1.55955	0.0080834	0.0519896	-0.0286725	-0.26922	GC_LAR	Apobr	apolipoprotein B receptor	171504
ENSMUSG00000040564	18	18	10	8	0.274052	6.52149	6.0204	7.45108	6.91054	137.875	61.2	No	140.593	61.5909	96.7028	-1.19313	0.433392	7.58917	2.22045e-16	9.41863e-15	-0.75974	-1.62652	GC_LAR	Apoc1	apolipoprotein C-I	11812
ENSMUSG00000032081	18	18	10	8	0.31562	4.82945	4.53532	6.54242	6.25388	49.375	22.6	No	49.4803	21.4975	33.9343	-1.20698	0.53135	5.1801	2.22045e-16	9.41863e-15	-0.675631	-1.73833	GC_LAR	Apoc3	apolipoprotein C-III	11814
ENSMUSG00000074336	18	18	10	8	0.357488	3.43655	2.99197	6.144	5.71647	19.375	5.2	No	21.6025	4.9515	12.352	-2.11034	0.563976	13.8098	2.22045e-16	9.41863e-15	-1.54636	-2.67431	GC_LAR	Apoc4	apolipoprotein C-IV	11425
ENSMUSG00000022548	18	18	10	8	0.100561	7.38227	7.78063	7.76896	8.25617	177.5	267.7	No	156.059	244.217	205.035	0.634559	0.211107	8.89629	2.22045e-16	9.41863e-15	0.845666	0.423452	FLT_LAR	Apod	apolipoprotein D	11815
ENSMUSG00000047631	18	18	10	8	0.38342	3.23706	2.95993	6.03417	5.76065	16.25	6.3	No	17.1965	5.8517	10.8938	-1.54298	0.567153	7.40364	2.22045e-16	9.41863e-15	-0.97583	-2.11014	GC_LAR	Apof	apolipoprotein F	103161
ENSMUSG00000000049	18	18	10	8	0.371148	5.04925	4.61463	6.67823	6.2549	60.375	23.1	No	61.0435	22.1151	39.4166	-1.46651	0.529349	7.65562	2.22045e-16	9.41863e-15	-0.937166	-1.99586	GC_LAR	Apoh	apolipoprotein H	11818
ENSMUSG00000010601	18	18	10	8	0.0836688	8.11634	8.28278	8.39854	8.61093	291.5	338.1	No	274.33	329.007	304.706	0.259983	0.184366	1.97358	0.000803102	0.00702387	0.444349	0.0756177	FLT_LAR	Apol7a	apolipoprotein L 7a	75761
ENSMUSG00000044309	18	18	10	8	0.15766	8.44882	8.0972	8.80215	8.3544	446.25	292.5	No	399.877	270.691	328.107	-0.564432	0.254466	4.96504	2.22045e-16	9.41863e-15	-0.309966	-0.818898	GC_LAR	Apol7c	apolipoprotein L 7c	108956
ENSMUSG00000057346	18	18	10	8	0.109844	7.43993	7.57927	7.8834	8.05331	177.875	217.3	No	170.49	206.754	190.637	0.277756	0.214868	1.65782	0.00487058	0.033523	0.492625	0.0628882	FLT_LAR	Apol9a	apolipoprotein L 9a	223672
ENSMUSG00000090698	18	18	10	8	0.0996532	7.72391	7.85016	8.09857	8.25773	224.75	252.7	No	208.156	250.389	231.619	0.260524	0.219314	1.40127	0.017324	0.0990228	0.479838	0.0412104	FLT_LAR	Apold1	apolipoprotein L domain containing 1	381823
ENSMUSG00000024391	18	17	9	8	0.282258	2.59562	2.4695	5.82909	5.67117	8.75	5.4	No	9.03828	4.72421	6.64158	-0.896067	0.621192	2.09826	0.000365988	0.00346851	-0.274875	-1.51726	GC_LAR	Apom	apolipoprotein M	55938
ENSMUSG00000051716	18	18	10	8	0.227545	3.12245	2.91126	5.9807	5.75876	12.875	6.4	No	12.753	5.97053	8.98498	-1.08944	0.493814	4.90555	2.22045e-16	9.41863e-15	-0.595624	-1.58325	GC_LAR	Apon	apolipoprotein N	28194
ENSMUSG00000025375	18	18	10	8	0.0979903	8.31174	8.4694	8.55825	8.7633	341.875	408.2	No	317.39	373.047	348.311	0.229598	0.19065	1.44497	0.0141282	0.083309	0.420247	0.0389479	FLT_LAR	Aatk	apoptosis-associated tyrosine kinase	11302
ENSMUSG00000044217	18	15	9	6	0.274194	1.55518	1.70044	5.45255	5.65551	1.625	4.9	No	1.51126	5.17003	3.54391	1.69472	0.79887	4.38968	8.99281e-14	3.05164e-12	2.49359	0.895845	FLT_LAR	Aqp5	aquaporin 5	11830
ENSMUSG00000032204	18	18	10	8	0.232609	4.57209	4.30271	6.42733	6.16783	34.125	18.7	No	33.7444	17.9321	24.9598	-0.918863	0.425931	4.68792	1.77636e-15	7.1214e-14	-0.492933	-1.34479	GC_LAR	Aqp9	aquaporin 9	64008
ENSMUSG00000060063	18	18	10	8	0.10992	8.32315	8.131	8.65769	8.41286	376.875	295.3	No	338.653	273.025	302.193	-0.316871	0.128733	6.11673	2.22045e-16	9.41863e-15	-0.188138	-0.445604	GC_LAR	Alox5ap	arachidonate 5-lipoxygenase activating protein	11690
ENSMUSG00000020892	18	18	10	8	0.146154	2.83624	2.71309	5.89617	5.75563	9.125	5.7	No	8.93233	5.58152	7.07077	-0.66805	0.355288	3.58827	1.10175e-09	2.56643e-08	-0.312762	-1.02334	GC_LAR	Aloxe3	arachidonate lipoxygenase 3	23801
ENSMUSG00000050022	18	18	10	8	0.109623	6.97628	6.82877	7.62867	7.46259	148.25	120.4	No	136.854	112.515	123.333	-0.290857	0.209665	1.94117	0.000978386	0.00832974	-0.0811921	-0.500521	GC_LAR	Amz1	archaelysin family metallopeptidase 1	231842
ENSMUSG00000029722	18	18	10	8	0.0891259	10.0085	10.1242	10.0756	10.2382	1071.5	1243.2	No	1012.47	1148.5	1088.04	0.183484	0.11093	2.72236	3.77564e-06	5.43193e-05	0.294414	0.0725542	FLT_LAR	Agfg2	ArfGAP with FG repeats 2	231801
ENSMUSG00000037999	18	18	10	8	0.0782432	12.5367	12.6575	12.521	12.6981	6225.12	6971.1	No	5845.93	6624.63	6278.54	0.180086	0.100197	3.21384	4.81412e-08	9.1611e-07	0.280284	0.0798889	FLT_LAR	Arap2	ArfGAP with RhoGAP domain, ankyrin repeat and PH domain 2	212285
ENSMUSG00000021125	18	18	10	8	0.104506	6.27441	6.91913	6.97447	7.68622	76.125	147.7	No	67.5788	143.449	109.729	1.06688	0.268078	15.2882	2.22045e-16	9.41863e-15	1.33495	0.798797	FLT_LAR	Arg2	arginase type II	11847
ENSMUSG00000019987	18	18	10	8	0.190797	5.65736	5.17927	6.95471	6.47614	69.75	33.3	No	68.559	31.5847	48.0177	-1.11828	0.329485	11.5748	2.22045e-16	9.41863e-15	-0.788791	-1.44776	GC_LAR	Arg1	arginase, liver	11846
ENSMUSG00000031390	18	16	8	8	0.14433	2.4589	2.27711	5.84804	5.58123	7.25	3.9	No	8.49745	3.75398	5.86219	-1.08449	0.628966	2.99047	3.80036e-07	6.39856e-06	-0.455521	-1.71345	GC_LAR	Avpr2	arginine vasopressin receptor 2	12000
ENSMUSG00000018821	18	18	10	8	0.103244	8.27591	8.09854	8.61754	8.38987	335	289.9	No	334.917	267.752	297.603	-0.307628	0.164057	3.52924	2.05142e-09	4.59923e-08	-0.143572	-0.471685	GC_LAR	Avpi1	arginine vasopressin-induced 1	69534
ENSMUSG00000030850	18	18	10	8	0.0882137	11.0889	11.1891	11.1086	11.2539	2403.25	2576.7	No	2161.48	2377.12	2281.28	0.134776	0.0990593	1.84758	0.00170257	0.0135315	0.233835	0.0357164	FLT_LAR	Ate1	arginyltransferase 1	11907
ENSMUSG00000035277	18	18	10	8	0.109489	3.85267	3.74227	6.13545	6.02459	17.375	13.5	No	16.3336	12.3154	14.1013	-0.388997	0.256602	2.31577	8.39444e-05	0.0009149	-0.132394	-0.645599	GC_LAR	Arx	aristaless related homeobox	11878
ENSMUSG00000039901	18	18	10	8	0.0802534	9.691	9.76269	9.79324	9.89278	870.75	929.5	No	815.585	879.859	851.293	0.105431	0.0543669	3.75364	1.83234e-10	4.68761e-09	0.159798	0.0510644	FLT_LAR	Armh3	armadillo-like helical domain containing 3	71617
ENSMUSG00000019948	18	18	10	8	0.113593	7.87865	7.63485	8.31434	8.01444	265.375	208.5	No	252.131	193.783	219.715	-0.373104	0.156086	5.74205	2.22045e-16	9.41863e-15	-0.217018	-0.52919	GC_LAR	Actr6	ARP6 actin-related protein 6	67019
ENSMUSG00000002910	18	18	10	8	0.126684	8.57767	8.74335	8.7807	8.99794	385.375	478.7	No	373.021	474.469	429.381	0.346545	0.229415	2.25604	0.00012741	0.00133549	0.575961	0.11713	FLT_LAR	Arrdc2	arrestin domain containing 2	70807
ENSMUSG00000018909	18	18	10	8	0.0801158	12.3881	12.5612	12.3607	12.6138	5643.38	6611.7	No	5230.58	6216.21	5778.15	0.248159	0.0886136	7.78753	2.22045e-16	9.41863e-15	0.336773	0.159546	FLT_LAR	Arrb1	arrestin, beta 1	109689
ENSMUSG00000055116	18	18	10	8	0.0930262	9.98171	10.4165	9.96337	10.5747	1013	1525.5	No	950.639	1528.01	1271.4	0.683513	0.209747	10.3494	2.22045e-16	9.41863e-15	0.89326	0.473765	FLT_LAR	Arntl	aryl hydrocarbon receptor nuclear translocator-like	11865
ENSMUSG00000027761	18	18	10	8	0.0992487	10.8745	11.1074	10.8607	11.2	2185	2564.4	No	1894.74	2322.41	2132.33	0.292608	0.199077	2.14217	0.000274722	0.00267986	0.491685	0.0935312	FLT_LAR	Aadac	arylacetamide deacetylase	67758
ENSMUSG00000046561	18	18	10	8	0.0941751	7.13428	7.26561	7.66517	7.81851	146.5	169.5	No	136.761	158.618	148.904	0.213513	0.107303	3.95231	1.91738e-11	5.34731e-10	0.320815	0.10621	FLT_LAR	Arsj	arylsulfatase J	271970
ENSMUSG00000020884	18	18	10	8	0.252788	3.77302	3.41342	6.19618	5.84307	22.375	9	No	21.8753	7.95187	14.1401	-1.4365	0.491269	8.612	2.22045e-16	9.41863e-15	-0.945231	-1.92777	GC_LAR	Asgr1	asialoglycoprotein receptor 1	11889
ENSMUSG00000040963	18	18	10	8	0.131455	3.50932	3.28961	6.07712	5.8547	15.625	8.8	No	14.8824	7.99024	11.0534	-0.898387	0.367287	6.07114	2.22045e-16	9.41863e-15	-0.5311	-1.26567	GC_LAR	Asgr2	asialoglycoprotein receptor 2	11890
ENSMUSG00000018995	18	18	10	8	0.0813356	9.58204	9.67878	9.68668	9.82048	793.375	883.7	No	754.324	836	799.699	0.15227	0.0794801	3.65473	5.40759e-10	1.30712e-08	0.23175	0.0727903	FLT_LAR	Nars2	asparaginyl-tRNA synthetase 2 (mitochondrial)(putative)	244141
ENSMUSG00000033508	18	18	10	8	0.141136	4.95137	4.81357	6.53023	6.39447	36.875	28.6	No	35.4099	27.2437	30.8731	-0.367454	0.283852	1.68509	0.00421268	0.0296783	-0.0836017	-0.651306	GC_LAR	Asprv1	aspartic peptidase, retroviral-like 1	67855
ENSMUSG00000026491	18	18	10	8	0.0900888	12.2154	12.3515	12.1988	12.3992	5173.25	5713.9	No	4720.45	5348.17	5069.18	0.179287	0.116541	2.35533	6.33302e-05	0.000712065	0.295828	0.0627455	FLT_LAR	Ahctf1	AT hook containing transcription factor 1	226747
ENSMUSG00000032409	18	18	10	8	0.0805967	10.639	10.7991	10.66	10.8895	1685.38	1943.4	No	1562.94	1830.35	1711.5	0.225481	0.0983028	5.23219	2.22045e-16	9.41863e-15	0.323784	0.127179	FLT_LAR	Atr	ataxia telangiectasia and Rad3 related	245000
ENSMUSG00000034218	18	18	10	8	0.0900169	11.5707	11.6835	11.5727	11.7379	3348.62	3648.8	No	3032.6	3361.24	3215.17	0.147287	0.121987	1.45284	0.0136117	0.0808797	0.269274	0.0252995	FLT_LAR	Atm	ataxia telangiectasia mutated	11920
ENSMUSG00000069895	18	18	10	8	0.0875924	11.3977	11.4984	11.4085	11.5551	2902.88	3140.5	No	2674.32	2939.71	2821.76	0.134705	0.088382	2.31657	8.3469e-05	0.000910474	0.223087	0.0463234	FLT_LAR	Atxn1l	ataxin 1-like	52335
ENSMUSG00000024030	18	18	10	8	0.0820919	9.28158	9.40984	9.40449	9.58068	665.625	742.9	No	614.896	699.708	662.014	0.181702	0.12259	2.19053	0.0001991	0.00200444	0.304292	0.0591126	FLT_LAR	Abcg1	ATP binding cassette subfamily G member 1	11307
ENSMUSG00000029802	18	18	10	8	0.0901417	11.6738	11.9097	11.6361	11.9832	3649.75	4294.4	No	3259.37	4047.78	3697.37	0.312078	0.184274	2.84064	1.40536e-06	2.15131e-05	0.496352	0.127804	FLT_LAR	Abcg2	ATP binding cassette subfamily G member 2 (Junior blood group)	26357
ENSMUSG00000029299	18	18	10	8	0.0962457	8.34171	8.07689	8.69121	8.35435	378.875	282.9	No	347.13	260.859	299.202	-0.416024	0.133968	9.73563	2.22045e-16	9.41863e-15	-0.282057	-0.549992	GC_LAR	Abcg3	ATP binding cassette subfamily G member 3	27405
ENSMUSG00000032131	18	18	10	8	0.0897036	5.95144	6.08189	6.92481	7.06389	64.5	76.6	No	59.7015	70.6835	65.8026	0.232209	0.147734	2.50612	2.07995e-05	0.000260107	0.379943	0.0844748	FLT_LAR	Abcg4	ATP binding cassette subfamily G member 4	192663
ENSMUSG00000040505	18	18	10	8	0.103299	9.27709	9.43542	9.39333	9.60866	650.375	752.7	No	617.455	742.759	687.068	0.266262	0.209372	1.60369	0.00645881	0.0427214	0.475634	0.0568901	FLT_LAR	Abcg5	ATP binding cassette subfamily G member 5	27409
ENSMUSG00000024254	18	18	10	8	0.0930233	7.68325	7.89991	8.04703	8.31463	206.625	264.7	No	199.925	263.048	234.994	0.395887	0.226411	3.01588	3.02557e-07	5.17693e-06	0.622298	0.169476	FLT_LAR	Abcg8	ATP binding cassette subfamily G member 8	67470
ENSMUSG00000042962	18	17	9	8	0.134615	2.45682	2.28997	5.84945	5.61468	8	4	No	7.58922	3.53686	5.33791	-1.02821	0.405165	6.58757	2.22045e-16	9.41863e-15	-0.623041	-1.43337	GC_LAR	Gm5436	ATP synthase, H+ transporting, mitochondrial F1 complex, O subunit pseudogene	432676
ENSMUSG00000029036	18	18	10	8	0.0962254	10.7746	10.9447	10.7874	11.0302	1891.12	2249.1	No	1712.06	2055.48	1902.85	0.262457	0.134515	3.78045	1.35997e-10	3.50644e-09	0.396971	0.127942	FLT_LAR	Atad3a	ATPase family, AAA domain containing 3A	108888
ENSMUSG00000031862	18	18	10	8	0.085607	11.2737	11.3866	11.2845	11.4482	2643.38	2943.3	No	2440.03	2744.02	2608.92	0.168323	0.10375	2.62134	8.51524e-06	0.000114901	0.272072	0.0645731	FLT_LAR	Atp13a1	ATPase type 13A1	170759
ENSMUSG00000036622	18	18	10	8	0.123541	9.77045	9.91369	9.84603	10.0415	935.25	1145.1	No	863.507	1085.59	986.889	0.329115	0.256868	1.62529	0.00577626	0.0388715	0.585983	0.0722467	FLT_LAR	Atp13a2	ATPase type 13A2	74772
ENSMUSG00000037685	18	18	10	8	0.0764487	12.3449	12.5072	12.3205	12.5576	5292.12	6258.3	No	5101.33	6010.47	5606.41	0.236775	0.114367	4.25519	4.95382e-13	1.58492e-11	0.351142	0.122407	FLT_LAR	Atp8a1	ATPase, aminophospholipid transporter (APLT), class I, type 8A, member 1	11980
ENSMUSG00000029467	18	18	10	8	0.0848932	13.6664	13.8129	13.6334	13.8484	14046.5	16057.1	No	12833.9	14902.7	13983.2	0.215445	0.135086	2.5276	1.76585e-05	0.000224892	0.350531	0.0803588	FLT_LAR	Atp2a2	ATPase, Ca++ transporting, cardiac muscle, slow twitch 2	11938
ENSMUSG00000019943	18	18	10	8	0.0980796	13.4191	13.5748	13.3843	13.6129	12072.6	13572	No	10870.6	12752.7	11916.2	0.230171	0.162087	2.00281	0.000670505	0.00596335	0.392258	0.0680844	FLT_LAR	Atp2b1	ATPase, Ca++ transporting, plasma membrane 1	67972
ENSMUSG00000028457	18	18	10	8	0.0789283	6.09004	6.22145	7.00484	7.14762	69.75	82.3	No	66.3647	80.6733	74.3139	0.270022	0.221303	1.47825	0.0120561	0.0729553	0.491326	0.0487192	FLT_LAR	Atp8b5	ATPase, class I, type 8B, member 5	320571
ENSMUSG00000031441	18	18	10	8	0.078239	11.6118	11.7198	11.6146	11.7726	3286.75	3648.8	No	3111.51	3439.68	3293.83	0.144152	0.110059	1.70893	0.00370467	0.02662	0.254211	0.034093	FLT_LAR	Atp11a	ATPase, class VI, type 11A	50770
ENSMUSG00000006567	18	18	10	8	0.103547	7.83782	8.0735	8.15874	8.45422	236.875	301.1	No	222.962	285.723	257.829	0.352416	0.174222	4.05552	5.6799e-12	1.64874e-10	0.526638	0.178194	FLT_LAR	Atp7b	ATPase, Cu++ transporting, beta polypeptide	11979
ENSMUSG00000033379	18	18	10	8	0.10875	12.0476	11.9169	12.1003	11.9154	4596.38	4035.1	No	4510.21	3826.17	4130.19	-0.236647	0.16666	2.0256	0.000581576	0.00525236	-0.0699869	-0.403307	GC_LAR	Atp6v0b	ATPase, H+ transporting, lysosomal V0 subunit B	114143
ENSMUSG00000028238	18	18	10	8	0.132404	3.91241	3.77571	6.15594	6.02782	19.5	13.1	No	17.8914	12.781	15.0523	-0.521953	0.338919	2.38439	5.13513e-05	0.000592579	-0.183034	-0.860871	GC_LAR	Atp6v0d2	ATPase, H+ transporting, lysosomal V0 subunit D2	242341
ENSMUSG00000039105	18	18	10	8	0.108857	11.7726	11.6773	11.8236	11.6887	3889.12	3514.8	No	3649.42	3242.29	3423.24	-0.170013	0.13294	1.64145	0.0053089	0.0360958	-0.0370735	-0.302953	GC_LAR	Atp6v1g1	ATPase, H+ transporting, lysosomal V1 subunit G1	66290
ENSMUSG00000022229	18	18	10	8	0.115239	15.2224	15.4787	15.147	15.5246	42538.8	53414	No	38600.8	49674.2	44752.7	0.363834	0.240491	2.26179	0.000122444	0.00128807	0.604326	0.123343	FLT_LAR	Atp12a	ATPase, H+/K+ transporting, nongastric, alpha polypeptide	192113
ENSMUSG00000040907	18	18	10	8	0.142944	6.41753	6.20219	7.29616	7.06046	106.25	79.4	No	99.5105	72.1404	84.3049	-0.463928	0.279894	2.77235	2.49832e-06	3.68912e-05	-0.184034	-0.743822	GC_LAR	Atp1a3	ATPase, Na+/K+ transporting, alpha 3 polypeptide	232975
ENSMUSG00000024130	18	18	10	8	0.0842181	12.169	12.3658	12.1377	12.4251	4872.88	5831.2	No	4494.58	5471.82	5037.49	0.283047	0.116087	5.89544	2.22045e-16	9.41863e-15	0.399134	0.16696	FLT_LAR	Abca3	ATP-binding cassette, sub-family A (ABC1), member 3	27410
ENSMUSG00000018800	18	18	10	8	0.0864968	8.78511	9.00624	8.94187	9.2386	471.25	568.7	No	428.271	537.401	488.899	0.319586	0.131803	5.84261	2.22045e-16	9.41863e-15	0.451389	0.187783	FLT_LAR	Abca5	ATP-binding cassette, sub-family A (ABC1), member 5	217265
ENSMUSG00000020620	18	18	10	8	0.0957658	8.99722	9.17265	9.13649	9.37663	568.75	655	No	511.383	599.705	560.451	0.22432	0.169161	1.75349	0.00290197	0.0215712	0.393481	0.0551592	FLT_LAR	Abca8b	ATP-binding cassette, sub-family A (ABC1), member 8b	27404
ENSMUSG00000027048	18	18	10	8	0.477157	3.14454	2.77992	6.03117	5.68833	18.5	4.9	No	20.3661	5.0383	11.8507	-2.02233	0.728675	7.53979	2.22045e-16	9.41863e-15	-1.29366	-2.75101	GC_LAR	Abcb11	ATP-binding cassette, sub-family B (MDR/TAP), member 11	27413
ENSMUSG00000040584	18	18	10	8	0.114834	14.4952	14.7631	14.4206	14.815	26050.9	32749.7	No	22877.1	30323.3	27013.8	0.406446	0.224533	3.2326	4.02169e-08	7.73711e-07	0.630979	0.181912	FLT_LAR	Abcb1a	ATP-binding cassette, sub-family B (MDR/TAP), member 1A	18671
ENSMUSG00000028973	18	18	10	8	0.0925578	10.8683	10.9755	10.8937	11.0472	2067.88	2282.7	No	1853.42	2076.04	1977.1	0.162073	0.133619	1.46634	0.0127646	0.0766428	0.295692	0.0284533	FLT_LAR	Abcb8	ATP-binding cassette, sub-family B (MDR/TAP), member 8	74610
ENSMUSG00000023088	18	18	10	8	0.0817658	11.5957	11.7311	11.5921	11.7892	3264	3672.6	No	3052.55	3482.79	3291.57	0.189375	0.104819	3.24717	3.4948e-08	6.76803e-07	0.294194	0.0845561	FLT_LAR	Abcc1	ATP-binding cassette, sub-family C (CFTR/MRP), member 1	17250
ENSMUSG00000036872	18	8	3	5	0.307692	-0.55378	-0.608142	5.42398	5.26875	1.25	0.3	No	1.41214	0.239704	0.760786	-1.99754	1.24347	2.92044	7.05803e-07	1.13807e-05	-0.754065	-3.24101	GC_LAR	Abcc12	ATP-binding cassette, sub-family C (CFTR/MRP), member 12	244562
ENSMUSG00000025194	18	18	10	8	0.099824	7.74287	7.59564	8.1852	8.00419	243.625	202.8	No	231.075	190.086	208.303	-0.284047	0.180978	2.47709	2.58981e-05	0.000317971	-0.103068	-0.465025	GC_LAR	Abcc2	ATP-binding cassette, sub-family C (CFTR/MRP), member 2	12780
ENSMUSG00000030249	18	18	10	8	0.0851641	11.959	12.0855	11.9492	12.1347	4290.5	4819.9	No	3960.38	4457.23	4236.41	0.169763	0.126601	1.79014	0.00236433	0.0180807	0.296363	0.0431618	FLT_LAR	Abcc9	ATP-binding cassette, sub-family C (CFTR/MRP), member 9	20928
ENSMUSG00000055782	18	18	10	8	0.165793	8.45505	8.09121	8.80781	8.34991	479.875	302.5	No	411.13	287.386	342.383	-0.519874	0.332604	2.46492	2.83726e-05	0.00034497	-0.18727	-0.852478	GC_LAR	Abcd2	ATP-binding cassette, sub-family D (ALD), member 2	26874
ENSMUSG00000028127	18	18	10	8	0.0916222	12.566	12.7725	12.5246	12.8266	6783.38	8098.4	No	5980.35	7389.48	6763.2	0.304878	0.173288	3.06653	1.91018e-07	3.36385e-06	0.478166	0.13159	FLT_LAR	Abcd3	ATP-binding cassette, sub-family D (ALD), member 3	19299
ENSMUSG00000027312	18	18	10	8	0.0855244	11.5246	11.6956	11.5131	11.7617	3148.25	3650.4	No	2886.23	3413.42	3179.11	0.240498	0.102516	5.4683	2.22045e-16	9.41863e-15	0.343014	0.137982	FLT_LAR	Atrn	attractin	11990
ENSMUSG00000054843	18	18	10	8	0.0800161	13.0161	13.1278	12.9984	13.1614	8603.38	9556.5	No	8164.8	9170.57	8723.56	0.167471	0.102088	2.67811	5.41038e-06	7.52845e-05	0.26956	0.0653831	FLT_LAR	Atrnl1	attractin like 1	226255
ENSMUSG00000044337	18	18	10	8	0.102316	9.24902	9.15358	9.43291	9.30448	703.75	615.7	No	630.588	565.466	594.409	-0.160899	0.130786	1.52385	0.00965491	0.0604702	-0.0301125	-0.291685	GC_LAR	Ackr3	atypical chemokine receptor 3	12778
ENSMUSG00000021460	18	18	10	8	0.0968214	10.1004	10.0179	10.2137	10.0978	1187.38	1098.2	No	1124.98	1027.92	1071.06	-0.128392	0.096849	1.76168	0.00277292	0.0207527	-0.0315425	-0.22524	GC_LAR	Auh	AU RNA binding protein/enoyl-coenzyme A hydratase	11992
ENSMUSG00000037526	18	18	10	8	0.090916	9.46023	9.35332	9.62769	9.48136	774.5	694.8	No	722.846	647.015	680.717	-0.160175	0.09448	2.88518	9.58922e-07	1.51555e-05	-0.0656947	-0.254655	GC_LAR	Atg14	autophagy related 14	100504663
ENSMUSG00000041341	18	18	10	8	0.0797586	11.4125	11.5107	11.4233	11.5665	2874	3118.4	No	2707.67	2968.09	2852.35	0.131429	0.0990969	1.75302	0.00290957	0.0216216	0.230526	0.0323323	FLT_LAR	Atg2b	autophagy related 2B	76559
ENSMUSG00000002820	18	18	10	8	0.0849357	11.3517	11.276	11.4099	11.3017	2745.88	2603.4	No	2680.1	2461.71	2558.77	-0.120531	0.101151	1.42315	0.0156525	0.0911324	-0.0193804	-0.221682	GC_LAR	Atg4d	autophagy related 4D, cysteine peptidase	235040
ENSMUSG00000002983	18	18	10	8	0.0854834	10.8757	11.0119	10.8939	11.0898	1989.62	2268.7	No	1837.25	2121.99	1995.44	0.2057	0.090513	5.14	2.22045e-16	9.41863e-15	0.296213	0.115188	FLT_LAR	Relb	avian reticuloendotheliosis viral (v-rel) oncogene related B	19698
ENSMUSG00000026601	18	18	10	8	0.0946746	3.29969	3.14011	6.0177	5.8387	11.5	7.7	No	12.577	7.71808	9.8776	-0.634342	0.367662	3.11434	1.22942e-07	2.22675e-06	-0.266681	-1.002	GC_LAR	Axdnd1	axonemal dynein light chain domain containing 1	77352
ENSMUSG00000063439	18	18	10	8	0.0870756	6.65545	6.53213	7.4153	7.27611	108.125	96.1	No	106.77	90.5954	97.7841	-0.20773	0.141397	2.21182	0.000172435	0.00175858	-0.0663333	-0.349127	GC_LAR	B9d2	B9 protein domain 2	232987
ENSMUSG00000017716	18	18	10	8	0.125105	8.69302	8.43421	8.98745	8.64914	536.125	407.2	No	485.883	356.06	413.759	-0.446743	0.311864	2.06776	0.000445315	0.00414561	-0.134878	-0.758607	GC_LAR	Birc5	baculoviral IAP repeat-containing 5	11799
ENSMUSG00000024073	18	18	10	8	0.0842392	13.8966	14.0379	13.8613	14.073	16220.5	18173	No	15261.9	17208	16343.1	0.173061	0.133084	1.68259	0.00426942	0.0300057	0.306145	0.0399765	FLT_LAR	Birc6	baculoviral IAP repeat-containing 6	12211
ENSMUSG00000052271	18	18	10	8	0.411082	8.48111	8.50536	8.73682	8.76132	396.5	691.6	No	383.747	741.846	325.784	-0.452511	0.263861	2.95907	5.02491e-07	8.32703e-06	-0.18865	-0.716372	GC_LAR	Bhlha15	basic helix-loop-helix family, member a15	17341
ENSMUSG00000030256	18	18	10	8	0.0987403	8.05023	7.8752	8.43213	8.21321	302	250.6	No	286.688	230.757	255.615	-0.315059	0.183709	2.96211	4.89117e-07	8.12039e-06	-0.13135	-0.498768	GC_LAR	Bhlhe41	basic helix-loop-helix family, member e41	79362
ENSMUSG00000034266	18	18	10	8	0.139764	5.78168	5.58622	6.93323	6.73092	64.875	49.7	No	61.8085	46.0449	53.051	-0.410739	0.224126	3.37534	9.90685e-09	2.05798e-07	-0.186613	-0.634865	GC_LAR	Batf	basic leucine zipper transcription factor, ATF-like	53314
ENSMUSG00000026630	18	18	10	8	0.108197	5.09407	4.90925	6.6053	6.42417	39.125	29.7	No	38.2575	29.0457	33.1399	-0.395599	0.240348	2.73144	3.50477e-06	5.06161e-05	-0.155251	-0.635946	GC_LAR	Batf3	basic leucine zipper transcription factor, ATF-like 3	381319
ENSMUSG00000078566	18	18	10	8	0.105839	11.3087	11.1702	11.3787	11.1844	2922.88	2397.2	No	2741.14	2293.43	2492.41	-0.257369	0.194937	1.75215	0.00292359	0.0217074	-0.0624317	-0.452307	GC_LAR	Bnip3	BCL2/adenovirus E1B interacting protein 3	12176
ENSMUSG00000022051	18	18	10	8	0.115839	11.9422	11.8525	11.9889	11.8619	4451.25	3920.1	No	4091.38	3654.91	3848.9	-0.162924	0.121894	1.79318	0.0023241	0.0178301	-0.0410302	-0.284817	GC_LAR	Bnip3l	BCL2/adenovirus E1B interacting protein 3-like	12177
ENSMUSG00000037608	18	18	10	8	0.0831398	12.6926	12.7654	12.6885	12.7953	7133.75	7511.7	No	6567.52	7053.39	6837.45	0.101815	0.076633	1.76124	0.00277979	0.0207923	0.178448	0.0251822	FLT_LAR	Bclaf1	BCL2-associated transcription factor 1	72567
ENSMUSG00000003190	18	18	10	8	0.0854013	8.17541	8.2681	8.46318	8.58282	309.375	336.8	No	285.778	313.492	301.175	0.119775	0.0868157	1.94187	0.000974226	0.00830238	0.206591	0.0329593	FLT_LAR	Bcl2l12	BCL2-like 12 (proline rich)	75736
ENSMUSG00000040363	18	18	10	8	0.079757	11.1648	11.2923	11.1738	11.3595	2427.12	2732.5	No	2291.97	2566.51	2444.49	0.162499	0.128637	1.58895	0.00696512	0.0456911	0.291136	0.0338626	FLT_LAR	Bcor	BCL6 interacting corepressor	71458
ENSMUSG00000038214	18	18	10	8	0.0976251	8.79965	8.9459	8.97447	9.17007	482.5	565.6	No	443.262	515.541	483.417	0.215807	0.171849	1.57065	0.00764356	0.0495607	0.387656	0.0439585	FLT_LAR	Bend3	BEN domain containing 3	331623
ENSMUSG00000028545	18	18	10	8	0.0749814	7.63924	7.78016	8.02975	8.20346	206.125	239.2	No	192.901	226.926	211.804	0.225283	0.0900216	6.24609	2.22045e-16	9.41863e-15	0.315304	0.135261	FLT_LAR	Bend5	BEN domain containing 5	67621
ENSMUSG00000020169	18	15	7	8	0.2	1.03461	0.969542	5.58452	5.43308	2.875	1.7	No	2.90128	1.46122	2.10125	-0.889137	0.723379	1.52999	0.0093669	0.0590319	-0.165758	-1.61252	GC_LAR	Best3	bestrophin 3	382427
ENSMUSG00000033872	18	18	10	8	0.125392	4.03981	3.90951	6.1851	6.06616	21.125	15	No	18.6509	14.5591	16.3777	-0.41398	0.345315	1.45779	0.0132955	0.079234	-0.0686654	-0.759294	GC_LAR	Best4-ps	bestrophin 4, pseudogene	230664
ENSMUSG00000025484	18	18	10	8	0.104006	10.1469	10.0682	10.2553	10.146	1248	1133.2	No	1167.59	1062.95	1109.45	-0.134898	0.10655	1.60731	0.00633957	0.042049	-0.0283482	-0.241448	GC_LAR	Bet1l	Bet1 golgi vesicular membrane trafficking protein like	54399
ENSMUSG00000026156	18	14	8	6	0.208696	2.4639	2.31913	5.74614	5.60763	8.875	4.4	No	7.75307	4.10021	5.72371	-0.949435	0.750562	1.63318	0.00554372	0.03746	-0.198873	-1.7	GC_LAR	B3gat2	beta-1,3-glucuronyltransferase 2 (glucuronosyltransferase S)	280645
ENSMUSG00000041372	18	18	10	8	0.10616	11.8171	12.0107	11.7888	12.0738	3989.62	4720.9	No	3613.51	4306.4	3998.45	0.252415	0.174461	2.07811	0.000416764	0.0039047	0.426875	0.0779539	FLT_LAR	B4galnt3	beta-1,4-N-acetyl-galactosaminyl transferase 3	330406
ENSMUSG00000032066	18	18	10	8	0.107723	9.44283	9.704	9.51012	9.87496	820.75	956.8	No	713.435	893.08	813.238	0.321452	0.240356	1.77273	0.00260714	0.019697	0.561807	0.081096	FLT_LAR	Bco2	beta-carotene oxygenase 2	170752
ENSMUSG00000022723	18	18	10	8	0.0769024	11.7881	11.9235	11.7801	11.9773	3596.62	4175.8	No	3493.51	3998.02	3773.79	0.194847	0.12182	2.54339	1.56441e-05	0.000201185	0.316667	0.0730266	FLT_LAR	Crybg3	beta-gamma crystallin domain containing 3	224273
ENSMUSG00000074768	18	17	9	8	0.364676	5.04904	4.39087	6.741	6.10682	72.5	20.7	No	73.0644	21.6022	44.4743	-1.76345	0.753699	5.39577	2.22045e-16	9.41863e-15	-1.00975	-2.51715	GC_LAR	Bhmt	betaine-homocysteine methyltransferase	12116
ENSMUSG00000042118	18	15	7	8	0.325843	2.14658	1.90468	5.79638	5.47735	8.375	2.2	No	8.29898	2.073	4.8401	-2.01026	0.745373	7.31619	2.22045e-16	9.41863e-15	-1.26488	-2.75563	GC_LAR	Bhmt2	betaine-homocysteine methyltransferase 2	64918
ENSMUSG00000032086	18	18	10	8	0.0880962	10.6625	10.8053	10.6869	10.8916	1743.88	1988.7	No	1594.71	1837.78	1729.75	0.202393	0.106849	3.57246	1.30251e-09	3.00744e-08	0.309242	0.0955439	FLT_LAR	Bace1	beta-site APP cleaving enzyme 1	23821
ENSMUSG00000022684	18	18	10	8	0.0931851	11.9239	11.8436	11.9705	11.8548	4317	3875.9	No	3980.98	3642.61	3792.99	-0.12908	0.0937324	1.90258	0.001233	0.0102099	-0.0353478	-0.222813	GC_LAR	Bfar	bifunctional apoptosis regulator	67118
ENSMUSG00000039653	18	18	10	8	0.119779	5.82719	6.01307	6.83855	7.03985	64	75.7	No	55.4373	70.1805	63.628	0.31401	0.253722	1.54191	0.00882869	0.0561106	0.567731	0.060288	FLT_LAR	Baat	bile acid-Coenzyme A: amino acid N-acyltransferase	12012
ENSMUSG00000040466	18	18	10	8	0.111063	9.55434	9.39424	9.72673	9.5072	828.375	719.4	No	788.901	660.611	717.629	-0.251049	0.125586	4.01271	9.442e-12	2.69908e-10	-0.125463	-0.376636	GC_LAR	Blvrb	biliverdin reductase B (flavin reductase (NADPH))	233016
ENSMUSG00000057506	18	18	10	8	0.101724	9.33712	9.20331	9.52294	9.34093	688.25	609.4	No	679.867	587.751	628.692	-0.206122	0.160417	1.65622	0.00491206	0.0337555	-0.0457048	-0.366539	GC_LAR	Bloc1s2	biogenesis of lysosomal organelles complex-1, subunit 2	73689
ENSMUSG00000067787	18	18	10	8	0.0842714	10.7114	10.8543	10.7332	10.9387	1831	2008.5	No	1655.64	1903.9	1793.56	0.198737	0.119226	2.76552	2.64439e-06	3.89389e-05	0.317962	0.079511	FLT_LAR	Blcap	bladder cancer associated protein	53619
ENSMUSG00000024232	18	18	10	8	0.0956466	8.35993	8.25408	8.66756	8.53081	370.5	333	No	342.486	303.207	320.664	-0.171153	0.144618	1.40604	0.0169464	0.0973086	-0.0265353	-0.315771	GC_LAR	Bambi	BMP and activin membrane-bound inhibitor	68010
ENSMUSG00000022641	18	18	10	8	0.0869279	11.5798	11.6809	11.5854	11.7331	3318.12	3584	No	3043.27	3344.76	3210.77	0.134947	0.106069	1.61373	0.00613302	0.0408749	0.241016	0.0288774	FLT_LAR	Bbx	bobby sox HMG box containing	70508
ENSMUSG00000029335	18	18	10	8	0.0934902	11.1202	11.3834	11.0941	11.4754	2413.88	2964.6	No	2161.48	2793.62	2512.67	0.368449	0.130996	7.82328	2.22045e-16	9.41863e-15	0.499445	0.237453	FLT_LAR	Bmp3	bone morphogenetic protein 3	110075
ENSMUSG00000032726	18	18	10	8	0.0943453	7.3331	7.46646	7.80727	7.96573	167.375	196.8	No	158.225	185.503	173.379	0.23494	0.162153	2.08509	0.000398469	0.00374663	0.397093	0.072787	FLT_LAR	Bmp8a	bone morphogenetic protein 8a	12163
ENSMUSG00000052430	18	18	10	8	0.121314	6.14139	6.2917	7.02745	7.19341	73.5	90.4	No	67.845	87.3675	78.6909	0.354406	0.248049	2.02586	0.000580649	0.00524579	0.602455	0.106356	FLT_LAR	Bmpr1b	bone morphogenetic protein receptor, type 1B	12167
ENSMUSG00000067336	18	18	10	8	0.0790363	12.4565	12.6012	12.4348	12.6477	5834.88	6696.5	No	5548.78	6358.14	5998.43	0.196295	0.103441	3.58057	1.19538e-09	2.76737e-08	0.299736	0.0928546	FLT_LAR	Bmpr2	bone morphogenetic protein receptor, type II (serine/threonine kinase)	12168
ENSMUSG00000035131	18	18	10	8	0.141772	4.19989	4.30294	6.16513	6.26257	18.625	24.6	No	17.2942	21.7211	19.7536	0.351457	0.286021	1.52711	0.00950099	0.0596625	0.637478	0.0654363	FLT_LAR	Brinp3	bone morphogenetic protein/retinoic acid inducible neural specific 3	215378
ENSMUSG00000004031	18	18	10	8	0.108963	8.26724	8.43822	8.51928	8.73995	320.875	394.9	No	301.629	362.531	335.463	0.263769	0.149904	3.07995	1.68917e-07	2.99551e-06	0.413673	0.113865	FLT_LAR	Brinp2	bone morphogenic protein/retinoic acid inducible neural-specific 2	240843
ENSMUSG00000050108	18	13	8	5	0.181818	0.246164	0.284852	5.37849	5.46727	0.75	1.6	No	0.921177	1.57969	1.28702	1.07047	0.884047	1.49145	0.0113116	0.0690152	1.95451	0.186419	FLT_LAR	Bpifc	BPI fold containing family C	270757
ENSMUSG00000053046	18	18	10	8	0.298445	6.00205	6.32546	6.89285	7.26777	60.625	118.7	No	57.0275	121.57	63.323	0.256086	0.172216	2.21523	0.000168491	0.00172284	0.428301	0.0838701	FLT_LAR	Brsk2	BR serine/threonine kinase 2	75770
ENSMUSG00000002413	18	18	10	8	0.0731391	11.2835	11.4112	11.2898	11.4749	2547.62	2897.7	No	2468.37	2795.36	2650.03	0.179738	0.119942	2.23338	0.00014888	0.00154029	0.29968	0.0597962	FLT_LAR	Braf	Braf transforming gene	109880
ENSMUSG00000045763	18	18	10	8	0.109384	7.45895	7.34106	7.96092	7.82213	208.625	174.1	No	185.05	160.914	171.641	-0.213033	0.16482	1.69457	0.00400368	0.0284114	-0.0482123	-0.377853	GC_LAR	Basp1	brain abundant, membrane attached signal protein 1	70350
ENSMUSG00000048482	18	18	10	8	0.104046	3.28848	3.1606	5.99747	5.85594	10.875	8.6	No	13.5363	8.16575	10.5527	-0.562925	0.43479	1.87691	0.00143485	0.0116755	-0.128135	-0.997715	GC_LAR	Bdnf	brain derived neurotrophic factor	12064
ENSMUSG00000075269	18	14	6	8	0.2	0.882058	0.801487	5.58722	5.39379	2.875	1.2	No	2.90991	1.10259	1.90584	-1.29024	0.730107	3.2221	4.44833e-08	8.50193e-07	-0.560131	-2.02034	GC_LAR	Bex6	brain expressed family member 6	328660
ENSMUSG00000047843	18	18	10	8	0.108693	10.4083	10.2352	10.5247	10.2831	1456.75	1242.3	No	1461.98	1181.84	1306.35	-0.303782	0.16332	3.47589	3.56796e-09	7.79997e-08	-0.140462	-0.467101	GC_LAR	Bri3	brain protein I3	55950
ENSMUSG00000030268	18	18	10	8	0.0925	4.42253	4.2965	6.32561	6.19816	24.375	20.5	No	23.4817	18.5288	20.7301	-0.295205	0.209826	1.98522	0.00074762	0.00658682	-0.0853788	-0.505032	GC_LAR	Bcat1	branched chain aminotransferase 1, cytosolic	12035
ENSMUSG00000032263	18	18	10	8	0.0790008	8.71155	8.83422	8.90577	9.06842	436.5	487.5	No	409.61	474.22	445.504	0.208716	0.126595	2.70167	4.47015e-06	6.33749e-05	0.335312	0.0821209	FLT_LAR	Bckdhb	branched chain ketoacid dehydrogenase E1, beta polypeptide	12040
ENSMUSG00000010277	18	18	10	8	0.0887262	14.0103	14.1302	13.9824	14.1597	18095.4	19814.6	No	16398.6	18375.3	17496.8	0.163981	0.12213	1.7945	0.00230686	0.0177185	0.286111	0.0418513	FLT_LAR	Bltp2	bridge-like lipid transfer protein family member 2	72503
ENSMUSG00000098112	18	18	10	8	0.101919	7.90559	7.75556	8.31007	8.12574	285.375	225	No	259.347	213.16	233.688	-0.291032	0.189496	2.37782	5.38561e-05	0.000616614	-0.101535	-0.480528	GC_LAR	Bin2	bridging integrator 2	668218
ENSMUSG00000022387	18	18	10	8	0.0828746	12.2466	12.3078	12.2517	12.3408	5150.75	5507.2	No	4823.39	5129.34	4993.36	0.0882528	0.0723881	1.48343	0.0117589	0.0714031	0.160641	0.0158646	FLT_LAR	Brd1	bromodomain containing 1	223770
ENSMUSG00000109946	18	18	10	8	0.0989247	6.06908	6.17435	6.99629	7.1102	72.375	81.6	No	65.1841	74.7642	70.5064	0.176685	0.138571	1.72148	0.00346039	0.0251359	0.315257	0.038114	FLT_LAR	Brd3os	bromodomain containing 3, opposite strand	100504116
ENSMUSG00000110613	18	18	10	8	0.188889	2.25814	2.1406	5.77884	5.62281	6.625	3.7	No	6.53724	3.76558	4.99743	-0.787483	0.559309	2.0069	0.000653692	0.00582564	-0.228173	-1.34679	GC_LAR	Lncbate1	brown adipose tissue enriched long non-coding RNA 1	109215
ENSMUSG00000085831	18	10	5	5	0.263158	-0.0180478	-0.0693934	5.43966	5.33033	1.625	0.6	No	1.6855	0.565522	1.06329	-1.51093	1.08278	1.9629	0.000857387	0.00743681	-0.428144	-2.59371	GC_LAR	Lncbate3	brown adipose tissue enriched long noncoding RNA 3	72229
ENSMUSG00000031264	18	18	10	8	0.115397	7.39901	7.24243	7.93131	7.74496	195.5	154.7	No	183.083	149.346	164.34	-0.296927	0.197488	2.27107	0.000114818	0.00121221	-0.0994385	-0.494415	GC_LAR	Btk	Bruton agammaglobulinemia tyrosine kinase	12229
ENSMUSG00000000202	18	13	8	5	0.137931	0.613751	0.656723	5.40205	5.49508	0.875	2.2	No	1.36453	1.93769	1.68295	1.14391	0.832127	1.7703	0.00264281	0.0199492	1.97604	0.311786	FLT_LAR	Btbd17	BTB (POZ) domain containing 17	72014
ENSMUSG00000062098	18	18	10	8	0.0812033	10.9389	10.9922	10.9774	11.0539	2067.75	2172	No	1947.52	2058.44	2009.14	0.0797057	0.0644123	1.52798	0.00946047	0.0594791	0.144118	0.0152934	FLT_LAR	Btbd3	BTB (POZ) domain containing 3	228662
ENSMUSG00000086150	18	18	10	8	0.142157	3.54189	3.35107	6.08508	5.88706	14.5	8.8	No	15.0394	8.80536	11.576	-0.765955	0.361302	4.51707	1.70974e-14	6.27996e-13	-0.404653	-1.12726	GC_LAR	Bach2os	BTB and CNC homology 2, opposite strand	414068
ENSMUSG00000040565	18	18	10	8	0.0891279	11.6711	11.8029	11.666	11.8591	3526.75	3910.5	No	3210.93	3669.58	3465.73	0.191286	0.108033	3.11968	1.16996e-07	2.12638e-06	0.299319	0.0832526	FLT_LAR	Btaf1	B-TFIID TATA-box binding protein associated factor 1	107182
ENSMUSG00000027379	18	18	10	8	0.136016	8.15775	7.93375	8.53348	8.25115	374.5	289.3	No	328.152	251.592	285.619	-0.382507	0.298691	1.65309	0.00499396	0.0342467	-0.0838162	-0.681198	GC_LAR	Bub1	BUB1, mitotic checkpoint serine/threonine kinase	12235
ENSMUSG00000041660	18	18	10	8	0.126761	3.5197	3.35501	6.07086	5.88976	13.75	10.3	No	14.4374	8.99655	11.4147	-0.591197	0.366009	2.63156	7.85275e-06	0.000106673	-0.225188	-0.957206	GC_LAR	Bbox1	butyrobetaine (gamma), 2-oxoglutarate dioxygenase 1 (gamma-butyrobetaine hydroxylase)	170442
ENSMUSG00000000706	18	18	10	8	0.146773	5.8105	5.49559	6.98087	6.6598	80.625	48.6	No	69.8733	43.935	55.4631	-0.671076	0.371511	3.3011	2.06774e-08	4.11966e-07	-0.299565	-1.04259	GC_LAR	Btn1a1	butyrophilin, subfamily 1, member A1	12231
ENSMUSG00000053216	18	12	6	6	0.208333	0.476468	0.419508	5.49119	5.37909	1.75	1	No	2.37422	0.932635	1.57334	-1.06631	0.924719	1.50511	0.0105847	0.065222	-0.141587	-1.99103	GC_LAR	Btn2a2	butyrophilin, subfamily 2, member A2	238555
ENSMUSG00000020490	18	16	8	8	0.25	1.69051	1.46489	5.72213	5.45144	4.75	1.4	No	8.08914	1.40222	4.37419	-2.38351	0.820523	8.41243	2.22045e-16	9.41863e-15	-1.56299	-3.20403	GC_LAR	Btnl10	butyrophilin-like 10	192194
ENSMUSG00000024340	18	18	10	8	0.103286	6.11408	6.26915	7.00905	7.17804	73.125	90.6	No	66.536	83.0767	75.7253	0.309877	0.205068	2.29048	0.000100286	0.00107562	0.514944	0.104809	FLT_LAR	Btnl2	butyrophilin-like 2	547431
ENSMUSG00000061728	18	18	10	8	0.137594	5.96995	6.09992	6.93812	7.08169	63.625	82.1	No	60.3335	77.4793	69.859	0.359954	0.275627	1.69036	0.00409526	0.0289882	0.635581	0.0843273	FLT_LAR	Btnl7-ps	butyrophilin-like 7, pseudogene	195349
ENSMUSG00000022440	18	18	10	8	0.0890718	9.39629	9.23878	9.58238	9.36748	731.125	642.2	No	706.685	599.569	647.176	-0.233534	0.149937	2.43529	3.53679e-05	0.000420687	-0.0835979	-0.383471	GC_LAR	C1qtnf6	C1q and tumor necrosis factor related protein 6	72709
ENSMUSG00000032120	18	18	10	8	0.0801484	11.1009	11.1982	11.1218	11.2618	2289.12	2561.8	No	2165.73	2402.73	2297.39	0.149529	0.0970164	2.3662	5.85717e-05	0.000663955	0.246546	0.0525131	FLT_LAR	C2cd2l	C2 calcium-dependent domain containing 2-like	71764
ENSMUSG00000028300	18	18	10	8	0.0943627	9.53517	9.45479	9.68898	9.57908	819.375	731.7	No	760.118	695.444	724.188	-0.130747	0.0961833	1.85285	0.00165131	0.0131679	-0.0345639	-0.226931	GC_LAR	C9orf72	C9orf72, member of C9orf72-SMCR8 complex	73205
ENSMUSG00000017978	18	18	10	8	0.0916421	11.8772	11.96	11.8819	12.003	4124.88	4339.6	No	3739.53	4045.56	3909.55	0.11205	0.0942059	1.41154	0.0165203	0.0952571	0.206256	0.017844	FLT_LAR	Cadps2	Ca2+-dependent activator protein for secretion 2	320405
ENSMUSG00000054423	18	18	10	8	0.0912111	8.47786	8.5863	8.71078	8.85213	370.75	425.9	No	349.97	393.462	374.132	0.173351	0.0938136	3.40469	7.37496e-09	1.55412e-07	0.267164	0.0795373	FLT_LAR	Cadps	Ca2+-dependent secretion activator	27062
ENSMUSG00000028532	18	18	10	8	0.0813631	11.5629	11.6501	11.573	11.7002	3229.38	3481.9	No	3003.2	3270.79	3151.86	0.122062	0.0985663	1.5292	0.00940353	0.0592202	0.220628	0.0234956	FLT_LAR	Cachd1	cache domain containing 1	320508
ENSMUSG00000000303	18	18	10	8	0.0781688	15.06	15.1846	15.0298	15.2111	36014.1	40783	No	33483.5	38415.4	36223.4	0.198182	0.109346	3.26584	2.91689e-08	5.70344e-07	0.307529	0.0888359	FLT_LAR	Cdh1	cadherin 1	12550
ENSMUSG00000022321	18	18	10	8	0.144981	3.85917	3.73234	6.14835	6.01513	16.875	13.4	No	17.8619	12.461	14.8614	-0.423463	0.347641	1.54691	0.00861136	0.0549292	-0.075822	-0.771105	GC_LAR	Cdh10	cadherin 10	320873
ENSMUSG00000047216	18	18	10	8	0.0957699	8.99987	9.23994	9.12326	9.44971	553.25	694.5	No	498.838	636.311	575.212	0.345865	0.153974	5.00855	2.22045e-16	9.41863e-15	0.499839	0.191891	FLT_LAR	Cdh19	cadherin 19, type 2	227485
ENSMUSG00000025370	18	17	9	8	0.204545	1.18961	1.13301	5.60068	5.49578	3.125	1.9	No	3.08911	1.71896	2.32792	-0.72774	0.591416	1.54619	0.0086426	0.0550936	-0.136324	-1.31916	GC_LAR	Cdh9	cadherin 9	12565
ENSMUSG00000023473	18	18	10	8	0.0825577	6.86665	7.10093	7.45973	7.72417	118.125	152.6	No	115.087	145.137	131.781	0.333084	0.194735	2.89856	8.54015e-07	1.35955e-05	0.527819	0.138349	FLT_LAR	Celsr3	cadherin, EGF LAG seven-pass G-type receptor 3	107934
ENSMUSG00000039155	18	18	10	8	0.112946	6.32368	6.12871	7.22787	7.02074	97.375	73.5	No	87.377	67.5808	76.3791	-0.379315	0.191208	3.98621	1.29001e-11	3.62845e-10	-0.188106	-0.570523	GC_LAR	Cdh26	cadherin-like 26	381409
ENSMUSG00000034918	18	18	10	8	0.0863028	14.3405	14.4894	14.3031	14.521	22726.8	25791.7	No	20545	24089.6	22514.2	0.229535	0.163486	1.95775	0.000884698	0.00764345	0.393021	0.0660491	FLT_LAR	Cdhr2	cadherin-related family member 2	268663
ENSMUSG00000025497	18	18	10	8	0.0783527	14.0337	14.1417	14.0099	14.1681	17958.4	19842.7	No	16583.1	18566.6	17685	0.162894	0.1178	1.90329	0.00122776	0.0101794	0.280694	0.0450936	FLT_LAR	Cdhr5	cadherin-related family member 5	72040
ENSMUSG00000030666	18	18	10	8	0.159383	5.89968	5.68149	7.01244	6.77501	76.875	55.2	No	75.5293	50.4614	61.6027	-0.567512	0.363806	2.44634	3.2585e-05	0.000390946	-0.203706	-0.931319	GC_LAR	Calcb	calcitonin-related polypeptide, beta	116903
ENSMUSG00000030538	18	18	10	8	0.104834	11.9577	11.8441	12.0103	11.8474	4395.62	3994.4	No	4154.93	3650.52	3874.71	-0.185907	0.141965	1.72158	0.00345855	0.0251331	-0.0439424	-0.327872	GC_LAR	Cib1	calcium and integrin binding 1 (calmyrin)	23991
ENSMUSG00000037493	18	18	10	8	0.111082	7.69175	7.53463	8.14846	7.95722	229	194	No	218.342	183.822	199.164	-0.243793	0.163834	2.22219	0.000160692	0.00165015	-0.0799589	-0.407627	GC_LAR	Cib2	calcium and integrin binding family member 2	56506
ENSMUSG00000074240	18	17	9	8	0.142857	1.74467	1.65751	5.69306	5.54368	4.375	2.8	No	4.60607	2.46964	3.41917	-0.732531	0.531245	1.94808	0.000938258	0.00805065	-0.201286	-1.26378	GC_LAR	Cib3	calcium and integrin binding family member 3	234421
ENSMUSG00000005649	18	14	7	7	0.153846	0.620666	0.565623	5.52281	5.40703	1.875	1.1	No	2.47948	1.10215	1.7143	-0.923849	0.830792	1.48183	0.01185	0.0719066	-0.0930564	-1.75464	GC_LAR	Cabp5	calcium binding protein 5	29865
ENSMUSG00000040118	18	18	10	8	0.0909158	10.9496	11.072	10.9681	11.1445	2140	2380.8	No	1953.79	2207.33	2094.65	0.174004	0.111022	2.44732	3.23491e-05	0.000388354	0.285027	0.0629823	FLT_LAR	Cacna2d1	calcium channel, voltage-dependent, alpha2/delta subunit 1	12293
ENSMUSG00000057914	18	18	10	8	0.084821	9.01181	9.20026	9.14971	9.40437	522.375	640.8	No	503.768	610.353	562.982	0.2761	0.122096	5.07282	2.22045e-16	9.41863e-15	0.398196	0.154004	FLT_LAR	Cacnb2	calcium channel, voltage-dependent, beta 2 subunit	12296
ENSMUSG00000020723	18	18	10	8	0.097561	5.24757	5.36761	6.57519	6.69652	38.875	46.8	No	36.4871	43.3387	40.2935	0.24313	0.174236	1.95971	0.00087423	0.00756544	0.417366	0.0688938	FLT_LAR	Cacng4	calcium channel, voltage-dependent, gamma subunit 4	54377
ENSMUSG00000026407	18	18	10	8	0.105736	6.34686	6.07545	7.26265	6.97853	94.75	68.9	No	89.2857	66.1365	76.425	-0.431942	0.222603	3.78342	1.31556e-10	3.39862e-09	-0.209339	-0.654546	GC_LAR	Cacna1s	calcium channel, voltage-dependent, L type, alpha 1S subunit	12292
ENSMUSG00000020866	18	18	10	8	0.0885443	6.54293	6.79674	7.24766	7.52698	93.625	125	No	91.6278	122.511	108.785	0.417819	0.251734	2.71742	3.93154e-06	5.6285e-05	0.669553	0.166085	FLT_LAR	Cacna1g	calcium channel, voltage-dependent, T type, alpha 1G subunit	12291
ENSMUSG00000046031	18	18	10	8	0.12766	4.98837	4.8412	6.54024	6.40167	38.625	30.2	No	34.7511	27.863	30.9244	-0.342905	0.247251	1.96393	0.000851975	0.00739719	-0.0956541	-0.590156	GC_LAR	Calhm6	calcium homeostasis modulator family member 6	215900
ENSMUSG00000061414	18	18	10	8	0.108259	12.4356	12.2201	12.4995	12.1926	6081.25	4824.7	No	6209.52	4740.57	5393.44	-0.389303	0.230928	2.8615	1.17589e-06	1.8342e-05	-0.158375	-0.620231	GC_LAR	Cracr2a	calcium release activated channel regulator 2A	381812
ENSMUSG00000048200	18	18	10	8	0.0844203	10.0006	9.89323	10.1267	9.9755	1109.25	1029.2	No	1048.5	949.783	993.657	-0.14122	0.117773	1.44228	0.0143086	0.0842403	-0.0234478	-0.258993	GC_LAR	Cracr2b	calcium release activated channel regulator 2B	213573
ENSMUSG00000057897	18	18	10	8	0.0839908	9.59463	9.70507	9.69463	9.84567	802.625	929.5	No	758.131	876.515	823.9	0.209133	0.154232	1.82787	0.00190761	0.014989	0.363365	0.0549006	FLT_LAR	Camk2b	calcium/calmodulin-dependent protein kinase II, beta	12323
ENSMUSG00000051980	18	18	10	8	0.131048	4.53147	4.64546	6.26383	6.39095	24.375	30.1	No	21.5906	26.921	24.5519	0.2786	0.229215	1.60866	0.00629565	0.041821	0.507815	0.0493856	FLT_LAR	Casr	calcium-sensing receptor	12374
ENSMUSG00000029761	18	18	10	8	0.0753478	13.5231	13.4112	13.5592	13.3952	12354.4	11377.9	No	12236.9	10791.1	11433.7	-0.181122	0.127384	2.02948	0.000567582	0.00514718	-0.0537373	-0.308506	GC_LAR	Cald1	caldesmon 1	109624
ENSMUSG00000041570	18	18	10	8	0.0872484	11.4172	11.6165	11.4	11.6902	2888.38	3438.4	No	2676.7	3244.28	2992.02	0.276091	0.113757	5.84439	2.22045e-16	9.41863e-15	0.389848	0.162335	FLT_LAR	Camsap2	calmodulin regulated spectrin-associated protein family, member 2	67886
ENSMUSG00000058626	18	12	5	7	0.396277	3.59675	3.06409	6.14797	5.58026	32.875	11.3	No	27.0889	8.22153	16.607	-1.71211	1.35585	1.58237	0.00720253	0.0470374	-0.356254	-3.06796	GC_LAR	Capn11	calpain 11	268958
ENSMUSG00000026509	18	18	10	8	0.0948784	12.3228	12.4377	12.3108	12.4793	5655.5	6146.1	No	5081.63	5685.3	5417	0.161088	0.118237	1.84853	0.00169326	0.0134698	0.279325	0.0428514	FLT_LAR	Capn2	calpain 2	12334
ENSMUSG00000001349	18	18	10	8	0.122025	14.5808	14.3305	14.6431	14.2744	29238.8	22807.7	No	26626.1	20668.8	23316.5	-0.365396	0.213585	2.94656	5.61152e-07	9.20059e-06	-0.15181	-0.578981	GC_LAR	Cnn1	calponin 1	12797
ENSMUSG00000039953	18	18	10	8	0.0884719	13.2288	13.3631	13.2025	13.397	10513.2	11974.4	No	9470.29	11006.4	10323.7	0.216619	0.15292	1.99399	0.000708232	0.00627765	0.369539	0.0636986	FLT_LAR	Clstn1	calsyntenin 1	65945
ENSMUSG00000035041	18	18	10	8	0.141514	8.27419	8.7088	8.45533	9.02237	324.375	517.1	No	309.897	499.806	415.402	0.687644	0.329894	4.23627	6.27276e-13	1.99477e-11	1.01754	0.35775	FLT_LAR	Creb3l3	cAMP responsive element binding protein 3-like 3	208677
ENSMUSG00000044288	18	18	10	8	0.116872	8.23989	8.42551	8.49099	8.73262	351	432.8	No	303.187	379.64	345.661	0.320998	0.261527	1.49605	0.0110622	0.0677513	0.582524	0.059471	FLT_LAR	Cnr1	cannabinoid receptor 1 (brain)	12801
ENSMUSG00000024019	18	18	10	8	0.0857138	11.4609	11.5776	11.4659	11.6355	3033.25	3346.1	No	2780.64	3117.07	2967.55	0.162505	0.087211	3.46071	4.1701e-09	9.01887e-08	0.249716	0.0752938	FLT_LAR	Cmtr1	cap methyltransferase 1	74157
ENSMUSG00000056737	18	18	10	8	0.115918	9.81709	9.62241	9.97557	9.70602	1089.25	866.9	No	964.142	787.124	865.798	-0.293564	0.190128	2.40006	4.58159e-05	0.000534093	-0.103436	-0.483692	GC_LAR	Capg	capping protein (actin filament), gelsolin-like	12332
ENSMUSG00000022211	18	18	10	8	0.126596	5.69827	5.55719	6.88067	6.73069	58.125	47.5	No	59.7197	46.2173	52.2183	-0.361328	0.277602	1.7005	0.00387775	0.0276746	-0.0837263	-0.638931	GC_LAR	Carmil3	capping protein regulator and myosin 1 linker 3	268747
ENSMUSG00000025991	18	18	10	8	0.136998	8.73815	8.41071	9.04098	8.61486	530	407.4	No	485.545	350.062	410.277	-0.471867	0.287141	2.72453	3.70923e-06	5.33931e-05	-0.184726	-0.759008	GC_LAR	Cps1	carbamoyl-phosphate synthetase 1	227231
ENSMUSG00000056643	18	18	10	8	0.106996	3.69081	3.40976	6.15502	5.85368	17.375	10.4	No	17.7083	9.05905	12.9031	-0.909002	0.477484	3.64901	5.75171e-10	1.38141e-08	-0.431517	-1.38649	GC_LAR	Chst13	carbohydrate sulfotransferase 13	71797
ENSMUSG00000084092	18	12	6	6	0.172414	0.442456	0.397546	5.47066	5.37926	2.25	1.1	No	1.80997	0.946999	1.33054	-0.988869	0.845039	1.48649	0.0115863	0.0704692	-0.14383	-1.83391	GC_LAR	Gm5843	carbonic anhydrase 1 pseudogene	545507
ENSMUSG00000027559	18	18	10	8	0.205725	12.1829	11.3494	12.3893	11.1077	7357.38	3884.9	No	6248.3	3714.6	4840.69	-0.750334	0.60793	1.53571	0.00910517	0.0576033	-0.142404	-1.35826	GC_LAR	Car3	carbonic anhydrase 3	12350
ENSMUSG00000025317	18	10	5	5	0.292683	1.1881	1.04794	5.58291	5.37291	3.625	1.2	No	4.38875	1.06544	2.54247	-1.95354	1.06699	3.34677	1.31738e-08	2.69618e-07	-0.886546	-3.02053	GC_LAR	Car5a	carbonic anhydrase 5a, mitochondrial	12352
ENSMUSG00000022947	18	18	10	8	0.139808	10.4369	10.0495	10.5989	10.0599	1832.5	1162.6	No	1630.82	1033.37	1298.9	-0.657968	0.258909	6.51319	2.22045e-16	9.41863e-15	-0.39906	-0.916877	GC_LAR	Cbr3	carbonyl reductase 3	109857
ENSMUSG00000050097	18	18	10	8	0.115162	9.62448	10.0232	9.63817	10.1969	876.5	1232.6	No	784.843	1163.32	995.109	0.566024	0.262478	4.55975	9.54792e-15	3.58204e-13	0.828502	0.303545	FLT_LAR	Ces2b	carboxyesterase 2B	234669
ENSMUSG00000057400	18	18	10	8	0.222399	7.47407	6.91843	8.09765	7.45624	294.75	141	No	273.335	129.926	193.663	-1.07371	0.484103	4.94616	2.22045e-16	9.41863e-15	-0.589605	-1.55781	GC_LAR	Ces1c	carboxylesterase 1C	13884
ENSMUSG00000056973	18	18	10	8	0.0972909	11.5691	11.9067	11.4942	11.9988	3702	4505.7	No	3143.24	4135.89	3694.71	0.395245	0.255539	2.36191	6.04051e-05	0.0006818	0.650784	0.139706	FLT_LAR	Ces1d	carboxylesterase 1D	104158
ENSMUSG00000031725	18	18	10	8	0.119497	11.1288	10.9755	11.2047	10.9925	2929.5	2210.5	No	2493.83	2004	2221.7	-0.316145	0.227262	1.94779	0.000939919	0.00806227	-0.0888828	-0.543407	GC_LAR	Ces1f	carboxylesterase 1F	234564
ENSMUSG00000055730	18	18	10	8	0.0984678	11.9974	12.4418	11.8912	12.5451	4546.25	6564.3	No	3997.91	6163.87	5201.22	0.62412	0.236702	6.79326	2.22045e-16	9.41863e-15	0.860822	0.387418	FLT_LAR	Ces2a	carboxylesterase 2A	102022
ENSMUSG00000031886	18	18	10	8	0.0939684	12.4511	12.7735	12.3691	12.8503	6343.5	8115.8	No	5629.24	7539.19	6690.32	0.421283	0.227964	3.36741	1.07249e-08	2.21566e-07	0.649246	0.193319	FLT_LAR	Ces2e	carboxylesterase 2E	234673
ENSMUSG00000062826	18	18	10	8	0.103939	5.35138	5.62906	6.58821	6.86551	42.125	57.7	No	41.4168	58.8751	51.1159	0.497422	0.389206	1.60778	0.00632427	0.0419899	0.886628	0.108216	FLT_LAR	Ces2f	carboxylesterase 2F	71903
ENSMUSG00000021999	18	15	8	7	0.484536	2.19173	2.01111	5.74093	5.56162	8.25	3.1	No	9.76137	2.92054	5.96091	-1.71617	0.8633	3.9129	3.0272e-11	8.25854e-10	-0.85287	-2.57947	GC_LAR	Cpb2	carboxypeptidase B2 (plasma)	56373
ENSMUSG00000020841	18	18	10	8	0.0940606	14.1061	14.2701	14.0649	14.3058	19552.4	22518.6	No	17502.6	20685.2	19270.7	0.240905	0.166295	2.08352	0.000402527	0.00377939	0.4072	0.0746107	FLT_LAR	Cpd	carboxypeptidase D	12874
ENSMUSG00000023176	18	18	10	8	0.177105	7.27475	7.85171	7.64838	8.34786	158.125	309.4	No	141.82	278.563	217.788	0.967941	0.294693	10.4025	2.22045e-16	9.41863e-15	1.26263	0.673248	FLT_LAR	Cpn2	carboxypeptidase N, polypeptide 2	71756
ENSMUSG00000024900	18	18	10	8	0.0972996	13.4313	13.6027	13.3908	13.6441	12190.2	14225.3	No	10947.1	12944.9	12056.9	0.241552	0.153628	2.45459	3.06464e-05	0.000369541	0.39518	0.0879244	FLT_LAR	Cpt1a	carnitine palmitoyltransferase 1a, liver	12894
ENSMUSG00000074570	18	18	10	8	0.090555	5.77924	5.65774	6.90571	6.78201	62.125	53	No	57.8292	49.4242	53.1598	-0.228906	0.158022	2.11065	0.000337718	0.00322032	-0.0708838	-0.386928	GC_LAR	Cass4	Cas scaffolding protein family member 4	320664
ENSMUSG00000063157	18	7	2	5	0.307692	-0.313936	-0.393323	5.44818	5.26236	1.25	0.3	No	2.30499	0.298521	1.19028	-2.59239	1.41897	3.34514	1.33882e-08	2.73368e-07	-1.17341	-4.01136	GC_LAR	Csn2	casein beta	12991
ENSMUSG00000015357	18	18	10	8	0.088425	10.8924	10.9961	10.9176	11.0675	2117.25	2258.7	No	1892.65	2083.98	1998.94	0.13697	0.115219	1.40981	0.0166534	0.0959196	0.252189	0.0217505	FLT_LAR	Clpx	caseinolytic mitochondrial matrix peptidase chaperone subunit	270166
ENSMUSG00000029863	18	18	10	8	0.0753818	10.9234	10.9746	10.9631	11.0365	2038.62	2147.2	No	1926.99	2031.4	1985	0.0752276	0.0588204	1.63254	0.00556212	0.0375615	0.134048	0.0164071	FLT_LAR	Casp2	caspase 2	12366
ENSMUSG00000033538	18	18	10	8	0.114602	9.72831	9.52634	9.89591	9.61705	932.375	782	No	913.578	739.73	816.996	-0.302309	0.203966	2.20776	0.000177245	0.0018006	-0.098343	-0.506274	GC_LAR	Casp4	caspase 4, apoptosis-related cysteine peptidase	12363
ENSMUSG00000013483	18	18	10	8	0.0889946	10.2017	10.3625	10.2441	10.4717	1213	1446.6	No	1168.03	1367.58	1278.89	0.227221	0.151675	2.22956	0.000152822	0.00157858	0.378896	0.0755465	FLT_LAR	Card14	caspase recruitment domain family, member 14	170720
ENSMUSG00000026928	18	18	10	8	0.111714	5.61973	5.48452	6.82531	6.69311	58	45.8	No	54.0745	43.0969	47.9758	-0.349811	0.203426	2.98989	3.82014e-07	6.42775e-06	-0.146385	-0.553237	GC_LAR	Card9	caspase recruitment domain family, member 9	332579
ENSMUSG00000038816	18	18	10	8	0.0794239	10.0273	10.1334	10.096	10.2452	1105.5	1219.5	No	1031.22	1145.66	1094.8	0.152586	0.0950302	2.56758	1.2976e-05	0.000169022	0.247617	0.0575562	FLT_LAR	Ctnnal1	catenin (cadherin associated protein), alpha-like 1	54366
ENSMUSG00000034101	18	18	10	8	0.0784625	13.8527	13.9345	13.8372	13.9576	15374.6	17022.6	No	14643	15919.8	15352.3	0.120821	0.0860273	1.96574	0.000842595	0.00732542	0.206848	0.0347936	FLT_LAR	Ctnnd1	catenin (cadherin associated protein), delta 1	12388
ENSMUSG00000038357	18	18	10	8	0.154839	2.92745	3.01931	5.81232	5.89428	6.75	10.1	No	6.74287	9.78407	8.43242	0.568434	0.439094	1.65784	0.00487026	0.033523	1.00753	0.12934	FLT_LAR	Camp	cathelicidin antimicrobial peptide	12796
ENSMUSG00000040828	18	18	10	8	0.0931953	5.21085	4.99805	6.66007	6.4512	44.125	32.3	No	41.3871	29.7396	34.9163	-0.477764	0.189002	6.44337	2.22045e-16	9.41863e-15	-0.288762	-0.666766	GC_LAR	Catsperd	cation channel sperm associated auxiliary subunit delta	106757
ENSMUSG00000070495	18	18	10	8	0.162562	4.91663	4.71636	6.53006	6.33459	39.375	29.4	No	34.7404	25.2808	29.485	-0.457642	0.309244	2.24624	0.000136308	0.00142252	-0.148398	-0.766886	GC_LAR	Ctcfl	CCCTC-binding factor (zinc finger protein)-like	664799
ENSMUSG00000087382	18	17	9	8	0.176768	3.54852	3.12752	6.1713	5.71235	17.375	5.9	No	19.08	6.28607	11.9723	-1.60824	0.586297	7.41876	2.22045e-16	9.41863e-15	-1.02195	-2.19454	GC_LAR	Ctcflos	CCCTC-binding factor (zinc finger protein)-like, opposite strand	74161
ENSMUSG00000086564	18	18	10	8	0.100567	5.28916	5.05082	6.70391	6.46846	47	33	No	44.6159	30.6409	36.852	-0.542582	0.209422	6.76073	2.22045e-16	9.41863e-15	-0.33316	-0.752004	GC_LAR	Cd101	CD101 antigen	630146
ENSMUSG00000046186	18	18	10	8	0.0897201	9.6569	9.81614	9.73673	9.95839	890.25	1031	No	800.367	942.931	879.569	0.234183	0.166074	1.97806	0.000781352	0.00684856	0.400257	0.0681092	FLT_LAR	Cd109	CD109 antigen	235505
ENSMUSG00000051439	18	18	10	8	0.108785	10.3697	10.6034	10.3796	10.7138	1501.38	1837	No	1316.95	1657.68	1506.24	0.330477	0.202061	2.64959	6.80237e-06	9.33205e-05	0.532538	0.128417	FLT_LAR	Cd14	CD14 antigen	12475
ENSMUSG00000052212	18	18	10	8	0.16415	12.535	12.0149	12.6653	11.8923	8607.75	5147.9	No	7351.79	4527.79	5782.9	-0.699321	0.384775	3.33069	1.54504e-08	3.13768e-07	-0.314546	-1.0841	GC_LAR	Cd177	CD177 antigen	68891
ENSMUSG00000028076	18	18	10	8	0.111512	8.69161	8.6045	8.94042	8.82774	485.25	415.3	No	430.884	384.505	405.118	-0.174273	0.127924	1.87806	0.00142525	0.0116046	-0.0463491	-0.302198	GC_LAR	Cd1d1	CD1d1 antigen	12479
ENSMUSG00000027863	18	18	10	8	0.127196	7.13443	6.97175	7.74142	7.55569	166.375	128.7	No	150.676	123.632	135.652	-0.29813	0.184628	2.62665	8.16446e-06	0.000110622	-0.113502	-0.482758	GC_LAR	Cd2	CD2 antigen	12481
ENSMUSG00000022667	18	18	10	8	0.0889085	5.96642	5.80717	7.01593	6.85491	71	56.8	No	66.9068	55.3992	60.5137	-0.287424	0.199839	2.07524	0.000424498	0.0039715	-0.087585	-0.487262	GC_LAR	Cd200r1	CD200 receptor 1	57781
ENSMUSG00000090176	18	18	10	8	0.113267	6.39916	6.18847	7.27848	7.0515	104.25	76.4	No	94.8738	70.1569	81.1422	-0.442755	0.22243	4.00983	9.76907e-12	2.78652e-10	-0.220325	-0.665185	GC_LAR	Cd200r2	Cd200 receptor 2	271375
ENSMUSG00000031494	18	18	10	8	0.149228	5.98541	5.53854	7.1013	6.64961	88.5	45.8	No	76.3774	41.1694	56.8174	-0.906738	0.224468	16.6623	2.22045e-16	9.41863e-15	-0.68227	-1.13121	GC_LAR	Cd209a	CD209a antigen	170786
ENSMUSG00000040165	18	18	10	8	0.142857	3.14607	3.00638	5.95622	5.8077	10.375	7.1	No	12.3738	7.5258	9.68048	-0.686839	0.572342	1.45068	0.0137517	0.0814935	-0.114498	-1.25918	GC_LAR	Cd209c	CD209c antigen	170776
ENSMUSG00000040197	18	15	7	8	0.142857	1.8438	1.72168	5.72698	5.49906	4.75	2.5	No	5.45343	2.65121	3.89664	-0.97609	0.670417	2.18846	0.000201885	0.00202803	-0.305673	-1.64651	GC_LAR	Cd209e	CD209e antigen	170780
ENSMUSG00000005763	18	18	10	8	0.122852	5.99702	5.76479	7.05356	6.81439	77.375	54.5	No	71.6083	51.6137	60.5002	-0.485393	0.205466	5.6274	2.22045e-16	9.41863e-15	-0.279927	-0.690859	GC_LAR	Cd247	CD247 antigen	12503
ENSMUSG00000016496	18	18	10	8	0.0770041	8.52436	8.3612	8.81924	8.60833	404.625	341.2	No	388.346	327.615	354.607	-0.247465	0.169366	2.14435	0.000270806	0.00264657	-0.0780992	-0.416831	GC_LAR	Cd274	CD274 antigen	60533
ENSMUSG00000026012	18	18	10	8	0.110226	7.4607	7.1326	8.01481	7.63282	215.125	141.8	No	193.222	135.571	161.193	-0.524379	0.183293	8.27104	2.22045e-16	9.41863e-15	-0.341086	-0.707672	GC_LAR	Cd28	CD28 antigen	12487
ENSMUSG00000061665	18	18	10	8	0.0850831	14.0046	14.099	13.9848	14.1238	17635	18947.9	No	16288.4	17875.5	17170.1	0.133959	0.0967226	1.91109	0.00117209	0.00979185	0.230682	0.0372369	FLT_LAR	Cd2ap	CD2-associated protein	12488
ENSMUSG00000032094	18	18	10	8	0.109576	6.0066	5.7043	7.08198	6.77617	72.125	50.9	No	73.771	51.7716	61.5491	-0.500267	0.286129	3.06649	1.91095e-07	3.36385e-06	-0.214139	-0.786396	GC_LAR	Cd3d	CD3 antigen, delta polypeptide	12500
ENSMUSG00000002033	18	18	10	8	0.127168	6.66876	6.54568	7.42246	7.2844	118	95.9	No	107.916	92.1775	99.1722	-0.24127	0.177662	1.85358	0.00164436	0.0131205	-0.0636078	-0.418932	GC_LAR	Cd3g	CD3 antigen, gamma polypeptide	12502
ENSMUSG00000063193	18	18	10	8	0.0992823	5.53044	5.27166	6.82265	6.5624	55.25	39.4	No	52.2332	36.0657	43.2513	-0.520728	0.204657	6.52683	2.22045e-16	9.41863e-15	-0.316071	-0.725385	GC_LAR	Cd300lb	CD300 molecule like family member B	217304
ENSMUSG00000034641	18	18	10	8	0.126871	6.22067	5.97559	7.17767	6.92393	93	65.9	No	82.2379	60.901	70.3841	-0.449014	0.214503	4.45336	3.93019e-14	1.39676e-12	-0.234511	-0.663516	GC_LAR	Cd300ld	CD300 molecule like family member d	217305
ENSMUSG00000069607	18	18	10	8	0.101812	5.96032	5.85648	6.99823	6.89104	70.25	59.7	No	66.672	57.0279	61.3141	-0.236993	0.195289	1.47704	0.0121263	0.0732787	-0.0417039	-0.432282	GC_LAR	Cd300ld3	CD300 molecule like family member D3	382551
ENSMUSG00000034652	18	18	10	8	0.110632	7.26691	7.04654	7.84992	7.59343	177.625	136.3	No	166.144	127.744	144.811	-0.383968	0.157302	6.00121	2.22045e-16	9.41863e-15	-0.226665	-0.54127	GC_LAR	Cd300a	CD300A molecule	217303
ENSMUSG00000044811	18	18	10	8	0.0928726	7.31188	7.06445	7.8887	7.60107	178.5	135	No	169.545	129.175	147.117	-0.39352	0.131192	9.03379	2.22045e-16	9.41863e-15	-0.262328	-0.524712	GC_LAR	Cd300c2	CD300C molecule 2	140497
ENSMUSG00000004609	18	18	10	8	0.105771	8.32823	8.10288	8.6708	8.38414	364.875	278.2	No	347.207	267.142	302.726	-0.38215	0.160607	5.69687	2.22045e-16	9.41863e-15	-0.221543	-0.542758	GC_LAR	Cd33	CD33 antigen	12489
ENSMUSG00000031132	18	16	9	7	0.246377	1.79809	1.70485	5.65282	5.54797	5	2.9	No	5.05759	2.58881	3.68605	-0.946234	0.708524	1.80078	0.00222636	0.0171956	-0.23771	-1.65476	GC_LAR	Cd40lg	CD40 ligand	21947
ENSMUSG00000005087	18	18	10	8	0.0968314	11.0732	10.9198	11.1582	10.9402	2494.75	2062.8	No	2258.12	1907.49	2063.32	-0.24436	0.13019	3.54264	1.78303e-09	4.02506e-08	-0.11417	-0.37455	GC_LAR	Cd44	CD44 antigen	12505
ENSMUSG00000015355	18	18	10	8	0.122776	7.96365	7.70177	8.38509	8.06143	293.75	214.6	No	269.451	201.598	231.755	-0.421115	0.157752	7.18083	2.22045e-16	9.41863e-15	-0.263363	-0.578866	GC_LAR	Cd48	CD48 antigen	12506
ENSMUSG00000024669	18	18	10	8	0.155012	5.55778	5.35177	6.8268	6.61673	56.875	40.3	No	55.8402	38.9895	46.4787	-0.516008	0.278847	3.43807	5.25628e-09	1.12569e-07	-0.237161	-0.794854	GC_LAR	Cd5	CD5 antigen	12507
ENSMUSG00000015854	18	18	10	8	0.143519	3.28463	3.51383	5.81573	6.06446	8.25	15	No	8.17497	14.9993	11.9663	0.855642	0.520091	2.64198	7.22846e-06	9.88566e-05	1.37573	0.335551	FLT_LAR	Cd5l	CD5 antigen-like	11801
ENSMUSG00000000682	18	18	10	8	0.168845	10.4454	10.1144	10.5992	10.1338	1703	1132.2	No	1543.52	1085.95	1289.31	-0.508055	0.202899	6.3199	2.22045e-16	9.41863e-15	-0.305157	-0.710954	GC_LAR	Cd52	CD52 antigen	23833
ENSMUSG00000040747	18	18	10	8	0.136619	9.63084	9.39125	9.81817	9.4832	974.75	695.1	No	869.153	657.454	751.543	-0.404719	0.192667	4.44674	4.28546e-14	1.51077e-12	-0.212053	-0.597386	GC_LAR	Cd53	CD53 antigen	12508
ENSMUSG00000026399	18	18	10	8	0.0949683	11.3201	11.171	11.3965	11.1832	2802.5	2382.7	No	2678.12	2284.88	2459.65	-0.228658	0.143779	2.54038	1.60099e-05	0.000205432	-0.0848787	-0.372438	GC_LAR	Cd55	CD55 molecule, decay accelerating factor for complement	13136
ENSMUSG00000024670	18	18	10	8	0.124183	5.82401	5.67113	6.9392	6.78595	69.125	51.8	No	63.4847	50.3071	56.1639	-0.352742	0.260889	1.84139	0.00176471	0.0139622	-0.0918529	-0.613631	GC_LAR	Cd6	CD6 antigen	12511
ENSMUSG00000030156	18	18	10	8	0.115068	6.94643	6.7065	7.63387	7.37003	139.125	107.7	No	133.298	106.408	118.359	-0.325222	0.244241	1.77992	0.00250428	0.0190073	-0.0809813	-0.569463	GC_LAR	Cd69	CD69 antigen	12515
ENSMUSG00000024610	18	18	10	8	0.127904	14.2224	14.0302	14.2679	13.9905	24112.4	18372.8	No	20992.3	16751.5	18636.3	-0.325645	0.220565	2.19359	0.000195042	0.0019668	-0.105081	-0.54621	GC_LAR	Cd74	CD74 antigen (invariant polypeptide of major histocompatibility complex, class II antigen-associated)	16149
ENSMUSG00000040592	18	18	10	8	0.148108	9.51039	9.3081	9.69454	9.41927	878.625	665.7	No	805.442	647.854	717.893	-0.315389	0.253371	1.55906	0.00810319	0.0520914	-0.0620187	-0.56876	GC_LAR	Cd79b	CD79B antigen	15985
ENSMUSG00000053044	18	18	10	8	0.139053	4.25099	3.99561	6.31576	6.06625	23.25	15.2	No	28.2401	14.344	20.52	-0.911137	0.455361	4.00661	1.01477e-11	2.88512e-10	-0.455776	-1.3665	GC_LAR	Cd8b1	CD8 antigen, beta chain 1	12526
ENSMUSG00000015396	18	18	10	8	0.147939	9.15925	8.9588	9.37962	9.11074	664.875	513.8	No	617.571	488.085	545.634	-0.340306	0.174653	3.82015	8.7141e-11	2.28715e-09	-0.165653	-0.51496	GC_LAR	Cd83	CD83 antigen	12522
ENSMUSG00000038147	18	18	10	8	0.0894657	8.67661	8.50539	8.9514	8.72751	439.5	372.7	No	428.914	365.228	393.533	-0.229992	0.174812	1.73676	0.00318253	0.0233987	-0.0551799	-0.404805	GC_LAR	Cd84	CD84 antigen	12523
ENSMUSG00000026490	18	18	10	8	0.0813273	11.9079	12.0148	11.9048	12.0621	4046.62	4456.3	No	3818.5	4208.2	4035	0.139752	0.0998248	1.95257	0.000913059	0.00785168	0.239577	0.0399274	FLT_LAR	Cdc42bpa	CDC42 binding protein kinase alpha	226751
ENSMUSG00000021279	18	18	10	8	0.085186	12.3576	12.4513	12.3513	12.4885	5507.62	6146.1	No	5215.95	5715.1	5493.26	0.131731	0.110526	1.41548	0.0162211	0.0938798	0.242256	0.0212049	FLT_LAR	Cdc42bpb	CDC42 binding protein kinase beta	217866
ENSMUSG00000027487	18	18	10	8	0.123561	9.54279	9.37776	9.71645	9.49139	850.125	692.5	No	795.413	654.674	717.225	-0.280071	0.160774	3.04963	2.22882e-07	3.88184e-06	-0.119298	-0.440845	GC_LAR	Cdk5rap1	CDK5 regulatory subunit associated protein 1	66971
ENSMUSG00000050961	18	18	10	8	0.146341	2.85035	2.63359	5.93559	5.6947	9.5	4.7	No	11.2252	4.61874	7.55494	-1.1889	0.488854	5.98869	2.22045e-16	9.41863e-15	-0.700051	-1.67776	GC_LAR	AY358078	cDNA sequence AY358078	278676
ENSMUSG00000033722	18	18	10	8	0.0822591	7.87962	8.09146	8.19944	8.46441	238.5	297.9	No	232.674	290.393	264.74	0.31771	0.197102	2.57285	1.24562e-05	0.000162815	0.514812	0.120608	FLT_LAR	BC034090	cDNA sequence BC034090	207792
ENSMUSG00000092564	18	18	10	8	0.105644	6.23587	6.09399	7.16588	7.01321	84.25	70.8	No	81.4719	67.0563	73.4632	-0.276906	0.197164	1.97929	0.000775448	0.00680464	-0.079742	-0.474071	GC_LAR	BC051226	cDNA sequence BC051226	407803
ENSMUSG00000094796	18	18	10	8	0.139616	4.90481	4.72662	6.52284	6.3421	37.25	27.5	No	33.7217	24.9917	28.8717	-0.438748	0.24801	3.18437	6.37357e-08	1.20071e-06	-0.190738	-0.686758	GC_LAR	BC147527	cDNA sequence BC147527	625360
ENSMUSG00000029330	18	18	10	8	0.0893292	12.7524	12.9748	12.7061	13.0323	7430.75	9085.2	No	6721.49	8379.26	7642.47	0.317599	0.123553	6.54347	2.22045e-16	9.41863e-15	0.441152	0.194046	FLT_LAR	Cds1	CDP-diacylglycerol synthase 1	74596
ENSMUSG00000043153	18	18	10	8	0.0862414	7.80656	7.90718	8.16862	8.2943	234.125	262.6	No	219.213	245.44	233.783	0.159316	0.0852125	3.49735	2.85861e-09	6.32284e-08	0.244528	0.0741033	FLT_LAR	Crppa	CDP-L-ribitol pyrophosphorylase A	75847
ENSMUSG00000054169	18	18	10	8	0.139171	11.7178	11.3003	11.8455	11.2399	4419.38	2881.8	No	3887.15	2560.51	3150.13	-0.602243	0.282579	4.58024	7.32747e-15	2.78074e-13	-0.319664	-0.884821	GC_LAR	Ceacam10	CEA cell adhesion molecule 10	26366
ENSMUSG00000030366	18	18	10	8	0.179104	4.10178	3.91896	6.22357	6.03586	22.875	15.2	No	24.0173	13.6768	18.2725	-0.762911	0.511123	2.23497	0.000147272	0.00152664	-0.251788	-1.27403	GC_LAR	Ceacam12	CEA cell adhesion molecule 12	67315
ENSMUSG00000064115	18	18	10	8	0.0922509	6.88131	7.04406	7.48487	7.67064	121.75	146.5	No	114.954	138.37	127.963	0.261557	0.159078	2.68905	4.95252e-06	6.96877e-05	0.420634	0.102479	FLT_LAR	Cadm2	cell adhesion molecule 2	239857
ENSMUSG00000054793	18	18	10	8	0.110402	7.2133	7.35138	7.71505	7.88275	157.375	187.5	No	143.864	170.939	158.906	0.238865	0.141888	2.85693	1.22283e-06	1.90067e-05	0.380754	0.096977	FLT_LAR	Cadm4	cell adhesion molecule 4	260299
ENSMUSG00000030077	18	18	10	8	0.100441	9.43905	9.66049	9.51884	9.82757	784.5	938.5	No	697.78	851.102	782.959	0.283611	0.195572	2.08873	0.000389248	0.00367175	0.479183	0.0880385	FLT_LAR	Chl1	cell adhesion molecule L1-like	12661
ENSMUSG00000038119	18	18	10	8	0.0792217	11.1318	11.3091	11.1294	11.3861	2364.12	2770.3	No	2200.8	2613.65	2430.16	0.246465	0.108688	5.10787	2.22045e-16	9.41863e-15	0.355153	0.137777	FLT_LAR	Cdon	cell adhesion molecule-related/down-regulated by oncogenes	57810
ENSMUSG00000032477	18	18	10	8	0.0830183	10.8747	11.0001	10.896	11.0764	1953.88	2219.2	No	1841.24	2092.65	1980.92	0.184588	0.0765963	5.77813	2.22045e-16	9.41863e-15	0.261184	0.107991	FLT_LAR	Cdc25a	cell division cycle 25A	12530
ENSMUSG00000027330	18	18	10	8	0.100432	9.27766	8.99518	9.50631	9.12445	718.125	558.6	No	667.312	501.303	575.085	-0.410783	0.174458	5.58563	2.22045e-16	9.41863e-15	-0.236325	-0.58524	GC_LAR	Cdc25b	cell division cycle 25B	12531
ENSMUSG00000044201	18	18	10	8	0.158218	6.57263	6.29132	7.41048	7.10057	130.875	90.6	No	115.147	78.0052	94.5127	-0.558859	0.330222	2.89596	8.73459e-07	1.38882e-05	-0.228637	-0.889081	GC_LAR	Cdc25c	cell division cycle 25C	12532
ENSMUSG00000023505	18	18	10	8	0.128336	9.32718	9.08067	9.53856	9.20524	841.25	657.1	No	744.444	568.248	646.558	-0.389006	0.316603	1.52077	0.00980287	0.0612074	-0.0724031	-0.705609	GC_LAR	Cdca3	cell division cycle associated 3	14793
ENSMUSG00000024754	18	18	10	8	0.0857998	11.7519	11.8704	11.7495	11.9219	3646	4066.9	No	3406.67	3835.75	3645.05	0.170601	0.108183	2.47528	2.6253e-05	0.000321728	0.278784	0.0624175	FLT_LAR	Cemip2	cell migration inducing hyaluronidase 2	83921
ENSMUSG00000052353	18	18	10	8	0.148858	5.99915	6.17368	6.94535	7.13083	63.625	84.8	No	61.6286	81.2629	72.5366	0.403383	0.262619	2.32938	7.62238e-05	0.000838048	0.666002	0.140764	FLT_LAR	Cemip	cell migration inducing protein, hyaluronan binding	80982
ENSMUSG00000033031	18	18	10	8	0.126112	9.18352	8.96641	9.4042	9.11203	733.25	582.2	No	647.976	509.243	570.902	-0.347116	0.258371	1.81789	0.00201979	0.0157574	-0.0887446	-0.605487	GC_LAR	Cip2a	cell proliferation regulating inhibitor of protein phosphatase 2A	224171
ENSMUSG00000019997	18	18	10	8	0.120004	10.1165	9.86853	10.2688	9.92292	1323.88	967.5	No	1182.5	918.826	1036.01	-0.366971	0.156955	5.50712	2.22045e-16	9.41863e-15	-0.210015	-0.523926	GC_LAR	Ccn2	cellular communication network factor 2	14219
ENSMUSG00000029177	18	18	10	8	0.100856	8.72814	8.41996	9.02993	8.62707	502.625	369.3	No	490.644	340.875	407.439	-0.522297	0.267465	3.83997	6.96565e-11	1.84481e-09	-0.254833	-0.789762	GC_LAR	Cenpa	centromere protein A	12615
ENSMUSG00000045328	18	18	10	8	0.131693	9.72659	9.50163	9.89792	9.58736	1034.38	830.9	No	944.357	740.824	831.283	-0.349744	0.262387	1.78875	0.00238297	0.0181968	-0.0873574	-0.612131	GC_LAR	Cenpe	centromere protein E	229841
ENSMUSG00000026605	18	18	10	8	0.126624	10.0937	9.86617	10.2374	9.92014	1337.62	1078	No	1240.26	959.959	1084.54	-0.369105	0.283067	1.71193	0.00364494	0.0262338	-0.0860376	-0.652171	GC_LAR	Cenpf	centromere protein F	108000
ENSMUSG00000031262	18	18	10	8	0.113881	7.24899	7.105	7.8237	7.64954	183.625	149.9	No	169.358	136.156	150.913	-0.308802	0.234107	1.74934	0.00296934	0.0219911	-0.0746948	-0.542909	GC_LAR	Cenpi	centromere protein I	102920
ENSMUSG00000064128	18	18	10	8	0.0846262	8.59018	8.48058	8.86153	8.71846	417.625	374.9	No	396.767	353.184	372.554	-0.167787	0.104717	2.57436	1.231e-05	0.000161064	-0.0630701	-0.272505	GC_LAR	Cenpj	centromere protein J	219103
ENSMUSG00000026708	18	18	10	8	0.088644	7.85807	7.70846	8.2756	8.08924	248.875	218.3	No	246.258	205.17	223.432	-0.244754	0.1429	2.95286	5.30811e-07	8.75223e-06	-0.101854	-0.387654	GC_LAR	Cenpl	centromere protein L	70454
ENSMUSG00000031756	18	18	10	8	0.121615	6.67224	6.48222	7.44419	7.23172	123.25	97.1	No	112.531	87.4856	98.617	-0.356389	0.218512	2.68014	5.32228e-06	7.40978e-05	-0.137877	-0.574902	GC_LAR	Cenpn	centromere protein N	72155
ENSMUSG00000023919	18	18	10	8	0.111288	7.87166	7.65746	8.30225	8.03697	276.75	217.1	No	254.302	197.014	222.476	-0.363682	0.180244	4.09885	3.37774e-12	1.00374e-10	-0.183438	-0.543925	GC_LAR	Cenpq	centromere protein Q	83815
ENSMUSG00000075266	18	18	10	8	0.103665	6.63585	6.45663	7.42333	7.22016	116.5	97.8	No	113.684	87.5558	99.1683	-0.357979	0.273168	1.72443	0.00340515	0.0248066	-0.0848111	-0.631146	GC_LAR	Cenpw	centromere protein W	66311
ENSMUSG00000072825	18	18	10	8	0.0921519	12.5455	12.675	12.5272	12.7154	6257.88	7304.9	No	5906.67	6763.55	6382.72	0.195351	0.134021	2.11273	0.000333183	0.00318401	0.329372	0.06133	FLT_LAR	Cep170b	centrosomal protein 170B	217882
ENSMUSG00000019971	18	18	10	8	0.0816888	9.8604	9.98588	9.93466	10.1107	984.875	1102.2	No	916.638	1040.09	985.222	0.178808	0.109121	2.67532	5.53322e-06	7.68717e-05	0.287929	0.0696873	FLT_LAR	Cep290	centrosomal protein 290	216274
ENSMUSG00000069135	18	18	10	8	0.0899788	9.7335	9.65919	9.86991	9.76692	929.25	859.2	No	867.866	803.914	832.337	-0.109497	0.0925414	1.40309	0.0171791	0.0984299	-0.016956	-0.202039	GC_LAR	Cep43	centrosomal protein 43	75296
ENSMUSG00000038215	18	18	10	8	0.0982324	8.45754	8.32598	8.75584	8.58558	378.625	336.4	No	366.868	319.826	340.734	-0.193346	0.152014	1.62302	0.00584467	0.0392516	-0.0413323	-0.34536	GC_LAR	Cep44	centrosomal protein 44	382010
ENSMUSG00000024989	18	18	10	8	0.137515	7.87521	7.61209	8.32055	7.99638	316.5	236.2	No	276.498	202.908	235.615	-0.445109	0.32794	1.85832	0.00159965	0.0128103	-0.117169	-0.77305	GC_LAR	Cep55	centrosomal protein 55	74107
ENSMUSG00000044066	18	18	10	8	0.0831786	10.3649	10.4432	10.4211	10.5327	1402.88	1516.6	No	1308.26	1411.92	1365.85	0.109113	0.0841175	1.67957	0.00433912	0.0304143	0.193231	0.0249959	FLT_LAR	Cep68	centrosomal protein 68	216543
ENSMUSG00000067578	18	18	10	8	0.128788	2.76879	2.63809	5.87242	5.72389	9.25	5.8	No	8.79272	5.17425	6.78246	-0.724261	0.430127	2.86998	1.09328e-06	1.71255e-05	-0.294134	-1.15439	GC_LAR	Cbln4	cerebellin 4 precursor protein	228942
ENSMUSG00000090336	18	11	4	7	0.208333	0.594312	0.496571	5.53769	5.33313	2	0.8	No	3.23103	0.767329	1.86231	-1.80568	1.04378	3.13465	1.01755e-07	1.86356e-06	-0.761901	-2.84947	GC_LAR	Cfap97d2	CFAP97 domain containing 2	403185
ENSMUSG00000014668	18	18	10	8	0.0942006	10.935	10.8683	11.0044	10.9095	2171.38	1994.3	No	1992.86	1853.64	1915.52	-0.106096	0.074563	2.03202	0.000558582	0.00508134	-0.0315328	-0.180659	GC_LAR	Chfr	checkpoint with forkhead and ring finger domains	231600
ENSMUSG00000060509	18	18	10	8	0.137571	6.87897	6.69284	7.5723	7.3654	152.25	107.9	No	131.043	100.743	114.21	-0.396383	0.218768	3.32959	1.56198e-08	3.16963e-07	-0.177615	-0.615151	GC_LAR	Xcr1	chemokine (C motif) receptor 1	23832
ENSMUSG00000020676	18	18	10	8	0.13051	9.48241	9.25892	9.67254	9.37034	931.875	692.7	No	806.132	615.811	700.398	-0.38958	0.254264	2.36628	5.85369e-05	0.000663847	-0.135316	-0.643844	GC_LAR	Ccl11	chemokine (C-C motif) ligand 11	20292
ENSMUSG00000071005	18	18	10	8	0.201232	6.12757	5.89752	7.13591	6.89741	102.375	64.2	No	93.8206	61.8987	76.0862	-0.60615	0.424679	2.0565	0.000478444	0.0044165	-0.181471	-1.03083	GC_LAR	Ccl19	chemokine (C-C motif) ligand 19	24047
ENSMUSG00000026166	18	18	10	8	0.158681	7.73528	7.56326	8.19748	7.97015	243.5	193.4	No	253.938	189.062	217.896	-0.418186	0.297681	1.9817	0.000764036	0.00672244	-0.120505	-0.715867	GC_LAR	Ccl20	chemokine (C-C motif) ligand 20	20297
ENSMUSG00000031779	18	18	10	8	0.13985	6.80665	6.47122	7.56968	7.19663	152.25	92	No	136.224	84.9948	107.764	-0.685581	0.292317	5.56293	2.22045e-16	9.41863e-15	-0.393264	-0.977897	GC_LAR	Ccl22	chemokine (C-C motif) ligand 22	20299
ENSMUSG00000035373	18	18	10	8	0.170294	5.24654	5.1496	6.64261	6.5556	46.25	41.1	No	41.3818	43.2787	34.1982	-0.553947	0.280828	3.9343	2.36362e-11	6.50218e-10	-0.273119	-0.834776	GC_LAR	Ccl7	chemokine (C-C motif) ligand 7	20306
ENSMUSG00000009185	18	18	10	8	0.129219	5.89954	5.44013	7.06478	6.6048	74.5	44.1	No	71.1679	40.631	54.203	-0.797808	0.284399	7.92156	2.22045e-16	9.41863e-15	-0.513408	-1.08221	GC_LAR	Ccl8	chemokine (C-C motif) ligand 8	20307
ENSMUSG00000025804	18	18	10	8	0.103736	8.63221	8.49421	8.90439	8.72347	460.125	376.1	No	413.881	356.708	382.118	-0.221805	0.136642	2.65261	6.64016e-06	9.11904e-05	-0.0851627	-0.358447	GC_LAR	Ccr1	chemokine (C-C motif) receptor 1	12768
ENSMUSG00000044052	18	18	10	8	0.133833	5.60836	5.2679	6.87977	6.54491	64.625	41.7	No	56.8343	37.961	46.3492	-0.58825	0.331919	3.18189	6.52505e-08	1.22748e-06	-0.256331	-0.92017	GC_LAR	Ccr10	chemokine (C-C motif) receptor 10	12777
ENSMUSG00000064039	18	12	4	8	0.15	0.121078	0.0483757	5.52829	5.30573	1.875	0.5	No	1.96054	0.471028	1.13303	-1.95431	0.904792	4.88413	2.22045e-16	9.41863e-15	-1.04952	-2.85911	GC_LAR	Ccr1l1	chemokine (C-C motif) receptor 1-like 1	12770
ENSMUSG00000049103	18	18	10	8	0.0962482	8.74471	8.56274	9.0097	8.77266	512.625	405.5	No	455.89	371.779	409.162	-0.300623	0.155436	3.7771	1.41179e-10	3.63293e-09	-0.145186	-0.456059	GC_LAR	Ccr2	chemokine (C-C motif) receptor 2	12772
ENSMUSG00000047898	18	18	10	8	0.128788	4.39433	4.19836	6.33882	6.1449	26.75	18.2	No	25.142	16.7929	20.5036	-0.569323	0.29532	3.74456	2.02595e-10	5.15285e-09	-0.274003	-0.864643	GC_LAR	Ccr4	chemokine (C-C motif) receptor 4	12773
ENSMUSG00000079227	18	18	10	8	0.100393	6.99834	6.83335	7.65096	7.46345	142	115.5	No	137.566	112.679	123.74	-0.288668	0.191698	2.2757	0.000111176	0.00117754	-0.0969699	-0.480366	GC_LAR	Ccr5	chemokine (C-C motif) receptor 5	12774
ENSMUSG00000040899	18	18	10	8	0.148897	6.50552	6.30771	7.34754	7.13145	105.25	79	No	105.989	79.3718	91.2019	-0.416061	0.295357	1.99173	0.000718204	0.0063532	-0.120704	-0.711418	GC_LAR	Ccr6	chemokine (C-C motif) receptor 6	12458
ENSMUSG00000037944	18	18	10	8	0.148718	6.82745	6.58203	7.5632	7.29045	144.875	98.6	No	136.356	96.6243	114.283	-0.501261	0.323712	2.41584	4.08181e-05	0.000480947	-0.177549	-0.824972	GC_LAR	Ccr7	chemokine (C-C motif) receptor 7	12775
ENSMUSG00000029530	18	18	10	8	0.0882145	6.38331	6.16023	7.28126	7.03667	88.375	71	No	97.1342	69.4942	81.7786	-0.452771	0.252957	3.2233	4.39728e-08	8.41659e-07	-0.199814	-0.705728	GC_LAR	Ccr9	chemokine (C-C motif) receptor 9	12769
ENSMUSG00000031778	18	18	10	8	0.0846381	11.7328	11.834	11.7354	11.8828	3662.88	3980.3	No	3376.83	3728.89	3572.42	0.14234	0.109076	1.69681	0.0039556	0.0281386	0.251416	0.0332647	FLT_LAR	Cx3cl1	chemokine (C-X3-C motif) ligand 1	20312
ENSMUSG00000023078	18	18	10	8	0.0937451	9.72237	9.99957	9.76228	10.1528	960.25	1161.5	No	837.091	1092.48	978.972	0.380822	0.200702	3.56115	1.46762e-09	3.35624e-08	0.581523	0.18012	FLT_LAR	Cxcl13	chemokine (C-X-C motif) ligand 13	55985
ENSMUSG00000018920	18	18	10	8	0.106266	9.46612	9.26527	9.65637	9.38269	795	634.4	No	744.294	600.538	664.43	-0.311547	0.119239	6.86746	2.22045e-16	9.41863e-15	-0.192308	-0.430785	GC_LAR	Cxcl16	chemokine (C-X-C motif) ligand 16	66102
ENSMUSG00000045382	18	18	10	8	0.122015	9.15233	8.90022	9.38587	9.04855	669.5	490.5	No	632.121	475.026	544.846	-0.412287	0.228214	3.28562	2.40605e-08	4.74339e-07	-0.184073	-0.640502	GC_LAR	Cxcr4	chemokine (C-X-C motif) receptor 4	12767
ENSMUSG00000048521	18	18	10	8	0.128588	7.07021	6.92609	7.69302	7.52661	155.75	129.7	No	142.688	119.246	129.665	-0.259402	0.162011	2.58356	1.1459e-05	0.000151133	-0.0973908	-0.421412	GC_LAR	Cxcr6	chemokine (C-X-C motif) receptor 6	80901
ENSMUSG00000026450	18	18	10	8	0.144456	7.60417	8.06913	7.92277	8.49764	208.75	333.5	No	185.485	308.509	253.832	0.730277	0.270561	7.10457	2.22045e-16	9.41863e-15	1.00084	0.459716	FLT_LAR	Chit1	chitinase 1 (chitotriosidase)	71884
ENSMUSG00000062778	18	11	4	7	0.210526	0.236691	0.157916	5.50565	5.31383	1.5	0.7	No	2.56379	0.576188	1.45957	-1.70273	1.06766	2.82174	1.65016e-06	2.50708e-05	-0.63507	-2.77039	GC_LAR	Chia1	chitinase, acidic 1	81600
ENSMUSG00000064246	18	18	10	8	0.0953237	4.94082	4.77098	6.53792	6.36702	34.75	27.8	No	34.43	25.7728	29.6205	-0.366533	0.208682	3.12408	1.12304e-07	2.04534e-06	-0.157851	-0.575216	GC_LAR	Chil1	chitinase-like 1	12654
ENSMUSG00000040809	18	16	10	6	0.270833	2.08718	2.20538	5.54645	5.74728	3.625	6.7	No	2.98774	6.1047	4.71938	0.936265	0.611875	2.37593	5.45984e-05	0.000624026	1.54814	0.32439	FLT_LAR	Chil3	chitinase-like 3	12655
ENSMUSG00000036960	18	18	10	8	0.116053	7.79372	7.32614	8.30952	7.7447	274.625	160.3	No	266.603	154.502	204.325	-0.78533	0.280004	7.91639	2.22045e-16	9.41863e-15	-0.505327	-1.06533	GC_LAR	Clca2	chloride channel accessory 2	229933
ENSMUSG00000028262	18	18	10	8	0.120333	9.20735	8.89427	9.44848	9.02892	657.25	508	No	730.717	519.41	613.324	-0.491131	0.377525	1.70392	0.00380659	0.0272481	-0.113606	-0.868656	GC_LAR	Clca3a2	chloride channel accessory 3A2	80797
ENSMUSG00000037033	18	18	10	8	0.124912	13.7544	13.5408	13.7985	13.4959	18331.5	13502.7	No	16312.7	12071	13956.2	-0.434485	0.291488	2.23841	0.000143842	0.00149522	-0.142997	-0.725973	GC_LAR	Clca3b	chloride channel accessory 3B	229927
ENSMUSG00000074195	18	18	10	8	0.2653	7.01228	7.35242	7.53626	7.93433	141.375	248	No	128.311	215.017	176.481	0.748167	0.400167	3.39768	7.91527e-09	1.66398e-07	1.14833	0.348001	FLT_LAR	Clca4b	chloride channel accessory 4B	99709
ENSMUSG00000074196	18	14	8	6	0.342466	1.70495	1.81536	5.51957	5.63597	2	5.7	No	2.45704	5.15955	3.95843	1.22881	0.869433	1.88072	0.00140307	0.0114487	2.09824	0.359376	FLT_LAR	Clca4c-ps	chloride channel accessory 4C, pseudogene	622139
ENSMUSG00000004319	18	18	10	8	0.0847048	12.5015	12.6383	12.4827	12.6827	6150.12	6867.9	No	5689.11	6516.32	6148.67	0.194858	0.0788214	6.07914	2.22045e-16	9.41863e-15	0.273679	0.116036	FLT_LAR	Clcn3	chloride channel, voltage-sensitive 3	12725
ENSMUSG00000004317	18	18	10	8	0.0972258	11.0906	11.2786	11.0831	11.3591	2387.62	2754.3	No	2146.53	2595.41	2395.91	0.272654	0.151204	3.22638	4.26914e-08	8.18921e-07	0.423858	0.12145	FLT_LAR	Clcn5	chloride channel, voltage-sensitive 5	12728
ENSMUSG00000029016	18	18	10	8	0.0841381	8.52896	8.68835	8.74085	8.94975	383.625	449	No	364.43	424.583	397.849	0.219787	0.125724	3.03836	2.46911e-07	4.26643e-06	0.345511	0.0940629	FLT_LAR	Clcn6	chloride channel, voltage-sensitive 6	26372
ENSMUSG00000036636	18	18	10	8	0.0872007	10.5945	10.6783	10.6381	10.7581	1655.12	1791.7	No	1527.39	1666.53	1604.69	0.122879	0.0805626	2.3246	7.88542e-05	0.000864077	0.203441	0.0423161	FLT_LAR	Clcn7	chloride channel, voltage-sensitive 7	26373
ENSMUSG00000006216	18	17	10	7	0.137725	2.93412	3.037	5.75799	5.89553	7.25	10.9	No	6.40265	9.80647	8.29366	0.563673	0.440498	1.68339	0.00425127	0.0299021	1.00417	0.123175	FLT_LAR	Clcnkb	chloride channel, voltage-sensitive Kb	56365
ENSMUSG00000015093	18	17	10	7	0.0992366	2.66155	2.76961	5.6942	5.86201	5.75	8.5	No	4.97328	7.97684	6.64192	0.577371	0.351455	2.79	2.15578e-06	3.22497e-05	0.928826	0.225917	FLT_LAR	Clic3	chloride intracellular channel 3	69454
ENSMUSG00000030898	18	15	9	6	0.114286	0.84943	0.900224	5.43907	5.54221	1.25	2.5	No	1.35369	2.34584	1.90488	0.966594	0.700063	1.92307	0.00109101	0.00920217	1.66666	0.266531	FLT_LAR	Cckbr	cholecystokinin B receptor	12426
ENSMUSG00000046159	18	18	10	8	0.103724	8.76357	8.5596	9.03436	8.76589	490.625	407.7	No	486.957	386.796	431.312	-0.330241	0.268324	1.52295	0.00969815	0.0607266	-0.061917	-0.598564	GC_LAR	Chrm3	cholinergic receptor, muscarinic 3, cardiac	12671
ENSMUSG00000074939	18	8	3	5	0.272727	-0.790967	-0.824298	5.39527	5.27955	1	0.3	No	1.08326	0.32859	0.663999	-1.55317	1.23041	1.6876	0.0041565	0.0293455	-0.322755	-2.78358	GC_LAR	Chrm5	cholinergic receptor, muscarinic 5	213788
ENSMUSG00000027107	18	14	7	7	0.210526	1.19431	1.10875	5.59589	5.44114	2.875	1.5	No	3.8366	1.54554	2.56379	-1.17877	0.819688	2.15958	0.000244833	0.00241066	-0.359081	-1.99846	GC_LAR	Chrna1	cholinergic receptor, nicotinic, alpha polypeptide 1 (muscle)	11435
ENSMUSG00000027577	18	17	10	7	0.114035	2.64099	2.5391	5.81357	5.71899	7.25	5.6	No	8.61843	5.04781	6.63475	-0.60028	0.5092	1.48353	0.0117534	0.0713865	-0.0910809	-1.10948	GC_LAR	Chrna4	cholinergic receptor, nicotinic, alpha polypeptide 4	11438
ENSMUSG00000027950	18	18	10	8	0.0872848	7.32423	7.46101	7.79624	7.9615	171.375	194	No	157.36	182.027	171.064	0.191866	0.128943	2.22872	0.000153692	0.0015857	0.320809	0.0629229	FLT_LAR	Chrnb2	cholinergic receptor, nicotinic, beta polypeptide 2 (neuronal)	11444
ENSMUSG00000031492	18	8	5	3	0.533333	0.0476935	-0.0497386	5.40692	5.31548	1.25	0.5	No	3.44729	0.434708	1.77363	-2.64827	1.48015	3.2536	3.28419e-08	6.37894e-07	-1.16812	-4.12841	GC_LAR	Chrnb3	cholinergic receptor, nicotinic, beta polypeptide 3	108043
ENSMUSG00000063765	18	18	10	8	0.12476	4.60911	4.74543	6.30682	6.4338	23.25	33.5	No	22.6884	29.8059	26.6425	0.437299	0.255445	2.91321	7.51765e-07	1.20479e-05	0.692744	0.181855	FLT_LAR	Chadl	chondroadherin-like	214685
ENSMUSG00000021763	18	18	10	8	0.101825	6.30613	6.47812	7.11939	7.30546	83.875	102.8	No	77.5237	94.9538	87.2071	0.286097	0.206537	1.91606	0.00113778	0.00954163	0.492634	0.0795594	FLT_LAR	Cspg4b	chondroitin sulfate proteoglycan 4B	408066
ENSMUSG00000022860	18	18	10	8	0.101576	8.07478	8.22308	8.36647	8.55714	302.5	341.8	No	266.646	310.214	290.85	0.20796	0.152516	1.86856	0.00150688	0.0122125	0.360476	0.0554442	FLT_LAR	Chodl	chondrolectin	246048
ENSMUSG00000006958	18	18	10	8	0.0915308	7.4977	7.712	7.90515	8.1656	182.25	234.4	No	172.373	218.937	198.242	0.345209	0.0952484	13.074	2.22045e-16	9.41863e-15	0.440457	0.24996	FLT_LAR	Chrd	chordin	12667
ENSMUSG00000030732	18	18	10	8	0.165211	5.92797	6.27402	6.87078	7.22349	54.5	93.8	No	58.9884	88.48	75.3726	0.624035	0.283698	4.69632	1.55431e-15	6.28875e-14	0.907733	0.340337	FLT_LAR	Chrdl2	chordin-like 2	69121
ENSMUSG00000006585	18	18	10	8	0.123309	8.80299	8.96359	8.97368	9.18733	496	623.4	No	442.416	544.583	499.176	0.299007	0.229972	1.6779	0.00437782	0.0306265	0.528979	0.0690349	FLT_LAR	Cdt1	chromatin licensing and DNA replication factor 1	67177
ENSMUSG00000005045	18	18	10	8	0.095296	8.42343	8.62551	8.64081	8.90425	359.875	451.9	No	342.786	415.261	383.05	0.275778	0.189036	2.11374	0.000330997	0.00316656	0.464814	0.0867421	FLT_LAR	Chd5	chromodomain helicase DNA binding protein 5	269610
ENSMUSG00000056608	18	18	10	8	0.127197	13.3874	13.6343	13.3295	13.6851	10688.4	14237.5	No	10366	14184.6	12487.5	0.452471	0.226114	3.9425	2.14913e-11	5.94946e-10	0.678586	0.226357	FLT_LAR	Chd9	chromodomain helicase DNA binding protein 9	109151
ENSMUSG00000021194	18	18	10	8	0.0884531	11.5105	11.6678	11.501	11.7277	3203	3770.9	No	2898.58	3429.32	3193.44	0.241951	0.180804	1.77849	0.00252448	0.019122	0.422756	0.061147	FLT_LAR	Chga	chromogranin A	12652
ENSMUSG00000094282	18	12	5	7	0.225806	0.637387	0.55184	5.55327	5.34816	2.75	0.9	No	2.6043	0.748427	1.57326	-1.66844	0.811313	4.45734	3.73035e-14	1.32933e-12	-0.857129	-2.47976	GC_LAR	Cfap73	cilia and flagella associated protein 73	546886
ENSMUSG00000028444	18	18	10	8	0.11759	5.47807	5.81018	6.62648	6.96574	43.5	68.1	No	40.6796	64.9668	54.1725	0.662462	0.278085	5.58178	2.22045e-16	9.41863e-15	0.940547	0.384378	FLT_LAR	Cntfr	ciliary neurotrophic factor receptor	12804
ENSMUSG00000073733	18	18	10	8	0.0967742	4.79473	4.66172	6.47087	6.33444	30	25.6	No	31.5368	24.2504	27.4888	-0.324383	0.248535	1.77466	0.00257917	0.0195025	-0.0758474	-0.572918	GC_LAR	Cplane2	ciliogenesis and planar polarity effector 2	76166
ENSMUSG00000009828	18	18	10	8	0.0825031	11.9885	12.0556	11.9961	12.0936	4331.12	4635.4	No	4028.21	4318.57	4189.52	0.0999287	0.0811068	1.51453	0.0101082	0.0627413	0.181036	0.0188219	FLT_LAR	Cilk1	ciliogenesis associated kinase 1	56542
ENSMUSG00000068876	18	18	10	8	0.0812438	12.7092	12.8808	12.6775	12.9287	6944.62	8259.5	No	6571.2	7809.81	7259.32	0.248885	0.123736	4.01579	9.10449e-12	2.60827e-10	0.372621	0.125149	FLT_LAR	Cgn	cingulin	70737
ENSMUSG00000032232	18	18	10	8	0.0741327	12.0659	12.2328	12.0444	12.2881	4379.38	5221.4	No	4202.46	4960.35	4623.51	0.23918	0.108631	4.81319	2.22045e-16	9.41863e-15	0.347812	0.130549	FLT_LAR	Cgnl1	cingulin-like 1	68178
ENSMUSG00000038550	18	18	10	8	0.121819	9.14763	8.48699	9.48006	8.60842	727.625	412	No	664.124	356.679	493.321	-0.896439	0.28821	9.75146	2.22045e-16	9.41863e-15	-0.608229	-1.18465	GC_LAR	Ciart	circadian associated repressor of transcription	229599
ENSMUSG00000029238	18	18	10	8	0.0840365	12.8166	12.9365	12.7988	12.9747	7724.88	8444.7	No	7089.63	7985.03	7587.08	0.170175	0.0668326	6.45561	2.22045e-16	9.41863e-15	0.237008	0.103343	FLT_LAR	Clock	circadian locomotor output cycles kaput	12753
ENSMUSG00000029516	18	18	10	8	0.102005	9.07661	8.88132	9.30479	9.04391	596.875	495	No	610.3	467.027	530.704	-0.382749	0.237885	2.60324	9.82147e-06	0.000131181	-0.144864	-0.620634	GC_LAR	Cit	citron	12704
ENSMUSG00000096188	18	18	10	8	0.0872533	13.738	13.8829	13.7054	13.9189	14702.8	16656.2	No	13467	15518.8	14606.9	0.204366	0.110828	3.38023	9.43275e-09	1.9657e-07	0.315194	0.0935376	FLT_LAR	Cmtm4	CKLF-like MARVEL transmembrane domain containing 4	97487
ENSMUSG00000040759	18	18	10	8	0.0961003	5.02787	5.20894	6.4488	6.638	34	44.6	No	29.8801	40.3987	35.7238	0.395044	0.205768	3.81389	9.34997e-11	2.44915e-09	0.600813	0.189276	FLT_LAR	Cmtm5	CKLF-like MARVEL transmembrane domain containing 5	67272
ENSMUSG00000022132	18	18	10	8	0.353341	5.17242	5.26177	6.54775	6.66445	37.875	58	No	34.7595	63.4894	31.7641	-0.283645	0.231051	1.51114	0.0102775	0.063627	-0.0525937	-0.514697	GC_LAR	Cldn10	claudin 10	58187
ENSMUSG00000050520	18	18	10	8	0.106634	11.2632	11.8991	11.1222	12.0495	2451.12	4466.7	No	2286.93	4315.26	3413.78	0.91587	0.219105	16.8078	2.22045e-16	9.41863e-15	1.13498	0.696765	FLT_LAR	Cldn8	claudin 8	54420
ENSMUSG00000029625	18	18	10	8	0.0784267	9.31928	9.37554	9.45846	9.53545	673.25	709.7	No	632.009	671.024	653.684	0.0806461	0.0508092	2.51651	1.92188e-05	0.000242415	0.131455	0.0298368	FLT_LAR	Cpsf4	cleavage and polyadenylation specific factor 4	54188
ENSMUSG00000033392	18	18	10	8	0.0823867	11.0835	11.1751	11.1065	11.2388	2310.62	2509	No	2146.41	2347.56	2258.16	0.127613	0.0773808	2.71293	4.0784e-06	5.81435e-05	0.204994	0.0502325	FLT_LAR	Clasp2	CLIP associating protein 2	76499
ENSMUSG00000034157	18	18	10	8	0.0854127	12.9207	12.8055	12.964	12.7939	8416.62	7706	No	7920.26	7132.06	7482.37	-0.151131	0.103942	2.1213	0.000315068	0.00302408	-0.0471891	-0.255072	GC_LAR	Cipc	CLOCK interacting protein, circadian	217732
ENSMUSG00000020741	18	18	10	8	0.0981132	12.7875	12.996	12.7446	13.0496	7568.25	9310.3	No	6909.16	8533.83	7811.76	0.30435	0.138001	4.81863	2.22045e-16	9.41863e-15	0.442352	0.166349	FLT_LAR	Cluh	clustered mitochondria (cluA/CLU1) homolog	74148
ENSMUSG00000032185	18	18	10	8	0.0892253	10.5732	10.6497	10.62	10.729	1607.75	1758.9	No	1509.33	1634.54	1578.89	0.114859	0.0925121	1.53748	0.00902536	0.0572204	0.207371	0.022347	FLT_LAR	Carm1	coactivator-associated arginine methyltransferase 1	59035
ENSMUSG00000027249	18	18	10	8	0.410684	4.77696	4.24341	6.59414	6.09667	53.875	16.8	No	54.5297	16.4288	33.3625	-1.73637	0.564333	9.36749	2.22045e-16	9.41863e-15	-1.17204	-2.30071	GC_LAR	F2	coagulation factor II	14061
ENSMUSG00000031138	18	17	9	8	0.221519	3.08584	2.78947	6.01684	5.67563	13.375	5.1	No	13.5042	4.73642	8.63323	-1.4733	0.494045	8.95758	2.22045e-16	9.41863e-15	-0.979258	-1.96735	GC_LAR	F9	coagulation factor IX	14071
ENSMUSG00000031444	18	18	10	8	0.257246	3.86406	3.5986	6.19978	5.92788	20.625	11.1	No	22.4021	10.1525	15.5967	-1.11046	0.487442	5.20222	2.22045e-16	9.41863e-15	-0.623021	-1.59791	GC_LAR	F10	coagulation factor X	14058
ENSMUSG00000021492	18	18	10	8	0.324675	2.96263	2.74619	5.93974	5.70959	12.25	5.6	No	13.1786	5.52089	8.92431	-1.24695	0.664897	3.51199	2.45561e-09	5.46364e-08	-0.582049	-1.91184	GC_LAR	F12	coagulation factor XII (Hageman factor)	58992
ENSMUSG00000026368	18	13	7	6	0.333333	2.01263	1.87744	5.66507	5.52926	6.875	2.9	No	6.59883	2.77511	4.47454	-1.27691	0.843157	2.31621	8.36813e-05	0.00091241	-0.433753	-2.12007	GC_LAR	F13b	coagulation factor XIII, beta subunit	14060
ENSMUSG00000025981	18	18	10	8	0.107293	11.376	11.2602	11.4408	11.2767	3130	2646.4	No	2801.57	2440.44	2600.94	-0.19967	0.161788	1.53019	0.00935751	0.0589869	-0.037882	-0.361457	GC_LAR	Coq10b	coenzyme Q10B	67876
ENSMUSG00000028247	18	18	10	8	0.0993096	8.63379	8.54119	8.89407	8.773	444.625	397.5	No	409.261	369.587	387.22	-0.149133	0.118276	1.59666	0.00669609	0.0441465	-0.0308571	-0.26741	GC_LAR	Coq3	coenzyme Q3 methyltransferase	230027
ENSMUSG00000026489	18	18	10	8	0.10375	10.8548	11.0132	10.8659	11.0932	2059.88	2381	No	1832.88	2161.29	2015.33	0.236485	0.161459	2.13201	0.000293721	0.00284438	0.397944	0.0750263	FLT_LAR	Coq8a	coenzyme Q8A	67426
ENSMUSG00000028795	18	18	10	8	0.0991235	8.96815	8.8649	9.18595	9.04842	565.125	506.3	No	516.925	464.506	487.803	-0.156756	0.132056	1.41781	0.0160462	0.093033	-0.0247006	-0.288812	GC_LAR	Ccdc28b	coiled coil domain containing 28B	66264
ENSMUSG00000036686	18	18	10	8	0.0909494	10.6763	10.8155	10.7018	10.9006	1710.12	2017.3	No	1598.16	1857.46	1742.22	0.216073	0.0992164	4.71818	1.11022e-15	4.55503e-14	0.31529	0.116857	FLT_LAR	Cc2d1a	coiled-coil and C2 domain containing 1A	212139
ENSMUSG00000028461	18	18	10	8	0.124264	10.8471	10.6917	10.935	10.7179	2031.88	1702.1	No	2039.95	1673.06	1836.12	-0.285494	0.240601	1.41539	0.0162279	0.0938798	-0.044893	-0.526094	GC_LAR	Ccdc107	coiled-coil domain containing 107	622404
ENSMUSG00000022768	18	18	10	8	0.104947	8.53967	8.26311	8.86209	8.50454	411.25	319.9	No	416.116	307.866	355.977	-0.433318	0.244787	3.15254	8.60613e-08	1.58941e-06	-0.18853	-0.678105	GC_LAR	Ccdc116	coiled-coil domain containing 116	76872
ENSMUSG00000079235	18	18	10	8	0.106195	2.50569	2.58287	5.71609	5.80915	5.125	7.2	No	4.8598	6.87235	5.97789	0.480302	0.391522	1.50392	0.0106464	0.0655406	0.871824	0.0887795	FLT_LAR	Ccdc13	coiled-coil domain containing 13	100502861
ENSMUSG00000004994	18	18	10	8	0.0853763	8.52889	8.45906	8.79834	8.70852	409.25	374.2	No	376.638	349.653	361.646	-0.119069	0.0915501	1.71347	0.00361454	0.0260719	-0.0275184	-0.210619	GC_LAR	Ccdc130	coiled-coil domain containing 130	67736
ENSMUSG00000036641	18	18	10	8	0.127778	5.67237	5.48477	6.87753	6.68231	57	44.4	No	57.3703	42.3532	49.0275	-0.403188	0.193172	4.42017	6.06182e-14	2.09212e-12	-0.210016	-0.596361	GC_LAR	Ccdc148	coiled-coil domain containing 148	227933
ENSMUSG00000091119	18	18	10	8	0.26087	5.15259	4.82591	6.68863	6.37341	89.375	32	No	81.0805	33.0529	54.3985	-1.29913	0.851955	2.32665	7.77199e-05	0.000852359	-0.447175	-2.15108	GC_LAR	Ccdc152	coiled-coil domain containing 152	100039139
ENSMUSG00000073207	18	18	10	8	0.111675	4.82467	4.95425	6.39009	6.51796	29.125	35.8	No	26.7817	33.059	30.2691	0.302543	0.198774	2.3345	7.35005e-05	0.000812522	0.501317	0.103769	FLT_LAR	Ccdc160	coiled-coil domain containing 160	434778
ENSMUSG00000026940	18	17	9	8	0.142857	2.22474	2.32681	5.63909	5.74074	3.75	6.1	No	3.7448	6.6502	5.35891	0.800082	0.627636	1.5916	0.00687168	0.045157	1.42772	0.172446	FLT_LAR	Ccdc183	coiled-coil domain containing 183	77058
ENSMUSG00000048701	18	18	10	8	0.0814081	11.7918	11.857	11.8035	11.8985	3756	3994.5	No	3518.61	3756.02	3650.51	0.0935002	0.0761916	1.50267	0.0107114	0.0659229	0.169692	0.0173086	FLT_LAR	Ccdc6	coiled-coil domain containing 6	76551
ENSMUSG00000043913	18	18	10	8	0.115489	5.33864	5.19008	6.70362	6.55278	45.75	37	No	45.3036	34.8221	39.4805	-0.368736	0.220778	2.79777	2.01975e-06	3.03529e-05	-0.147958	-0.589514	GC_LAR	Ccdc60	coiled-coil domain containing 60	269693
ENSMUSG00000043036	18	15	8	7	0.238095	1.90988	1.7612	5.69839	5.52264	4.875	2.4	No	6.79785	2.43572	4.37445	-1.38934	0.808681	2.9429	5.79542e-07	9.47846e-06	-0.580658	-2.19802	GC_LAR	Ccdc63	coiled-coil domain containing 63	330188
ENSMUSG00000071202	18	15	7	8	0.227273	1.30212	1.2066	5.62922	5.44561	3.5	1.6	No	3.82972	1.69996	2.64652	-1.18826	0.750657	2.52115	1.85508e-05	0.00023489	-0.437605	-1.93892	GC_LAR	Ccdc78	coiled-coil domain containing 78	381077
ENSMUSG00000084883	18	18	10	8	0.0913612	11.1226	11.2693	11.1288	11.3397	2384.88	2797.6	No	2179.98	2573.15	2398.41	0.238473	0.133939	3.14944	8.86018e-08	1.63289e-06	0.372413	0.104534	FLT_LAR	Ccdc85c	coiled-coil domain containing 85C	668158
ENSMUSG00000024732	18	18	10	8	0.0895258	8.96192	9.11031	9.11501	9.31537	548	632.8	No	491.513	579.781	540.55	0.234469	0.164337	2.02733	0.000575294	0.00520456	0.398806	0.0701322	FLT_LAR	Ccdc86	coiled-coil domain containing 86	108673
ENSMUSG00000026339	18	18	10	8	0.0823851	12.417	12.5316	12.4048	12.5708	5766.25	6504.3	No	5398.08	6114.05	5795.84	0.179388	0.127949	1.95575	0.000895567	0.00772467	0.307338	0.0514394	FLT_LAR	Ccdc93	coiled-coil domain containing 93	70829
ENSMUSG00000034173	18	18	10	8	0.141677	5.52703	5.31991	6.80784	6.59876	54.875	40.8	No	51.7639	37.9148	44.0699	-0.443075	0.219249	4.10791	3.02758e-12	9.02747e-11	-0.223826	-0.662324	GC_LAR	Chchd2l	coiled-coil-helix-coiled-coil-helix domain containing 2-like	71970
ENSMUSG00000045193	18	18	10	8	0.0791868	9.82942	9.99473	9.89523	10.1273	956.375	1114	No	895.076	1049.41	980.815	0.227252	0.112757	4.03945	6.87828e-12	1.98129e-10	0.340009	0.114495	FLT_LAR	Cirbp	cold inducible RNA binding protein	12696
ENSMUSG00000024225	18	18	10	8	0.849928	11.1545	11.3507	11.0871	11.4043	2874	25125.6	No	2731.17	29478.1	2274.35	-0.51671	0.43322	1.43388	0.0148859	0.0872099	-0.0834908	-0.94993	GC_LAR	Clps	colipase, pancreatic	109791
ENSMUSG00000046318	18	18	10	8	0.113248	7.45093	7.64512	7.87834	8.11294	176.75	227.7	No	171.095	219.293	197.871	0.35804	0.225443	2.49361	2.28668e-05	0.000283534	0.583483	0.132597	FLT_LAR	Ccbe1	collagen and calcium binding EGF domains 1	320924
ENSMUSG00000079465	18	18	10	8	0.0882883	4.79381	4.88735	6.39246	6.48138	27.625	33.4	No	26.6281	31.796	29.4991	0.270275	0.219872	1.50869	0.010401	0.0642708	0.490146	0.050403	FLT_LAR	Col4a3	collagen, type IV, alpha 3	12828
ENSMUSG00000028626	18	18	10	8	0.105051	6.49554	6.67157	7.23216	7.42963	90.875	125.3	No	86.2439	112.379	100.763	0.385064	0.226937	2.85895	1.20182e-06	1.87243e-05	0.612002	0.158127	FLT_LAR	Col9a2	collagen, type IX, alpha 2	12840
ENSMUSG00000004098	18	18	10	8	0.112254	8.5856	8.39103	8.87887	8.6267	452.75	347.8	No	429.296	333.595	376.129	-0.365895	0.233171	2.47905	2.55202e-05	0.000313918	-0.132724	-0.599066	GC_LAR	Col5a3	collagen, type V, alpha 3	53867
ENSMUSG00000039462	18	7	2	5	0.25	0.152655	0.0826752	5.46775	5.28557	1.75	0.6	No	2.14242	0.592432	1.28131	-1.7431	1.41294	1.54016	0.00890604	0.0565476	-0.330157	-3.15604	GC_LAR	Col10a1	collagen, type X, alpha 1	12813
ENSMUSG00000027966	18	18	10	8	0.105311	5.68822	5.85019	6.77401	6.94486	54.125	67.8	No	49.7856	61.5424	56.3171	0.289763	0.206233	2.00139	0.000676481	0.0060104	0.495996	0.0835297	FLT_LAR	Col11a1	collagen, type XI, alpha 1	12814
ENSMUSG00000024330	18	18	10	8	0.155786	5.2138	5.04056	6.66327	6.48693	43.75	32.4	No	46.5242	32.7159	38.8529	-0.503771	0.380874	1.75402	0.00289337	0.0215134	-0.122897	-0.884645	GC_LAR	Col11a2	collagen, type XI, alpha 2	12815
ENSMUSG00000058806	18	18	10	8	0.0929259	6.78283	6.98506	7.40439	7.63932	115.375	146.6	No	105.32	136.038	122.386	0.354397	0.17997	3.87388	4.73706e-11	1.27774e-09	0.534367	0.174427	FLT_LAR	Col13a1	collagen, type XIII, alpha 1	12817
ENSMUSG00000026141	18	18	10	8	0.115578	3.27695	3.42417	5.86726	6.0215	8.25	13.3	No	8.34544	12.3567	10.5739	0.624598	0.323103	3.71382	2.84225e-10	7.10536e-09	0.947701	0.301495	FLT_LAR	Col19a1	collagen, type XIX, alpha 1	12823
ENSMUSG00000025064	18	18	10	8	0.177143	4.16961	4.0568	6.22178	6.12359	23	16.6	No	21.4827	15.7743	18.3114	-0.477948	0.337816	2.02401	0.000587419	0.00530149	-0.140132	-0.815764	GC_LAR	Col17a1	collagen, type XVII, alpha 1	12821
ENSMUSG00000001435	18	18	10	8	0.105553	10.7145	10.8631	10.7333	10.9448	1860.25	2183.9	No	1677.23	1971.73	1840.84	0.232525	0.193317	1.43767	0.0146231	0.0858995	0.425842	0.0392079	FLT_LAR	Col18a1	collagen, type XVIII, alpha 1	12822
ENSMUSG00000063564	18	18	10	8	0.0996666	9.65957	9.84194	9.73358	9.98613	875.625	1069.4	No	793.47	976.203	894.988	0.297383	0.180832	2.68326	5.18999e-06	7.26405e-05	0.478215	0.116551	FLT_LAR	Col23a1	collagen, type XXIII, alpha 1	237759
ENSMUSG00000036905	18	18	10	8	0.121474	10.704	10.5506	10.8004	10.5835	2054.75	1659.8	No	1785.29	1507.43	1630.93	-0.245055	0.199149	1.52287	0.00970177	0.0607284	-0.0459054	-0.444204	GC_LAR	C1qb	complement component 1, q subcomponent, beta polypeptide	12260
ENSMUSG00000036907	18	10	4	6	0.181818	-0.685763	-0.71817	5.4163	5.29585	0.875	0.4	No	1.13499	0.372058	0.711138	-1.25072	1.12409	1.41182	0.0164995	0.0952162	-0.126627	-2.37481	GC_LAR	C1ql2	complement component 1, q subcomponent-like 2	226359
ENSMUSG00000098470	18	8	3	5	0.285714	0.161352	0.0922102	5.46842	5.30326	1.875	0.6	No	2.12	0.576363	1.26243	-1.75572	1.21307	2.13505	0.000287904	0.00279394	-0.542657	-2.96879	GC_LAR	C1rb	complement component 1, r subcomponent B	667277
ENSMUSG00000026405	18	18	10	8	0.102497	9.68439	9.51809	9.84527	9.61752	970.375	797.4	No	888.528	729.978	800.445	-0.282955	0.197767	2.05881	0.000471471	0.00435518	-0.0851878	-0.480722	GC_LAR	C4bp	complement component 4 binding protein	12269
ENSMUSG00000022181	18	17	10	7	0.143396	3.72777	3.54733	6.06635	5.94083	19.25	11.1	No	15.8995	10.237	12.7537	-0.711257	0.328605	4.91849	2.22045e-16	9.41863e-15	-0.382652	-1.03986	GC_LAR	C6	complement component 6	12274
ENSMUSG00000035031	18	10	4	6	0.4	1.46094	1.29384	5.62936	5.37671	4.625	1.3	No	5.61046	1.6366	3.40276	-1.81782	1.21014	2.18667	0.000204325	0.00205097	-0.607686	-3.02796	GC_LAR	C8a	complement component 8, alpha polypeptide	230558
ENSMUSG00000058952	18	18	10	8	0.24359	3.98469	3.67997	6.23736	5.94357	24.625	11.5	No	23.7435	10.818	16.5627	-1.1337	0.482447	5.56037	2.22045e-16	9.41863e-15	-0.651255	-1.61615	GC_LAR	Cfi	complement component factor i	12630
ENSMUSG00000090231	18	18	10	8	0.0990374	12.5328	12.7822	12.4785	12.8454	6649.38	8154.2	No	5832.07	7430.59	6720.14	0.348995	0.17055	4.14151	2.01417e-12	6.07461e-11	0.519544	0.178445	FLT_LAR	Cfb	complement factor B	14962
ENSMUSG00000057037	18	12	6	6	0.380952	1.1595	1.02844	5.58564	5.39646	4	1	No	4.13684	1.14451	2.47443	-1.95641	0.955023	4.15022	1.81122e-12	5.5131e-11	-1.00138	-2.91143	GC_LAR	Cfhr1	complement factor H-related 1	50702
ENSMUSG00000033898	18	16	9	7	0.417266	2.62823	2.34288	5.85584	5.58542	13.125	3.4	No	12.6493	3.38895	7.50465	-1.92476	0.790578	5.87933	2.22045e-16	9.41863e-15	-1.13418	-2.71534	GC_LAR	Cfhr2	complement factor H-related 2	545366
ENSMUSG00000070594	18	15	8	7	0.381579	1.87995	1.7169	5.69544	5.50033	6.625	2.3	No	6.66312	2.22882	4.19962	-1.59225	0.824072	3.74537	2.00802e-10	5.1122e-09	-0.768177	-2.41632	GC_LAR	Cfhr4	complement factor H-related 4	214403
ENSMUSG00000033615	18	18	10	8	0.130011	5.3493	5.49731	6.61168	6.76417	44.375	56.8	No	39.0938	49.6322	44.9485	0.332684	0.263931	1.61467	0.00610336	0.0406875	0.596615	0.0687533	FLT_LAR	Cplx1	complexin 1	12889
ENSMUSG00000031979	18	18	10	8	0.0925358	11.274	11.1829	11.3386	11.2074	2740.12	2502.3	No	2540.29	2306.65	2410.49	-0.13875	0.102391	1.84226	0.00175586	0.0138963	-0.0363592	-0.24114	GC_LAR	Cog2	component of oligomeric golgi complex 2	76332
ENSMUSG00000094915	18	12	6	6	0.2	2.07629	1.88248	5.72822	5.49272	5.5	2.6	No	8.96273	2.64453	5.45262	-1.68159	0.9693	2.94816	5.53312e-07	9.08337e-06	-0.712289	-2.65089	GC_LAR	LOC671917	component of Sp100-rs-like	671917
ENSMUSG00000039488	18	18	10	8	0.108	4.56074	4.67425	6.28882	6.39952	24	30.8	No	22.1996	27.7104	25.2612	0.317027	0.246821	1.68286	0.0042634	0.0299714	0.563848	0.0702062	FLT_LAR	Cntn5	contactin 5	244682
ENSMUSG00000030092	18	18	10	8	0.114618	5.79762	5.94273	6.83551	6.9904	60.125	72.3	No	53.4735	65.0903	59.9273	0.261377	0.183042	2.10904	0.000341279	0.00324956	0.444419	0.0783357	FLT_LAR	Cntn6	contactin 6	53870
ENSMUSG00000031772	18	18	10	8	0.12368	4.93293	5.13326	6.40874	6.61097	31.25	41.3	No	28.3481	38.5121	33.9948	0.416643	0.235932	3.12632	1.09984e-07	2.00587e-06	0.652575	0.180711	FLT_LAR	Cntnap4	contactin associated protein-like 4	170571
ENSMUSG00000030270	18	13	6	7	0.341463	1.41563	1.21951	5.65518	5.40616	3.625	1.2	No	7.39088	1.27217	3.99159	-2.42923	1.00592	5.66069	2.22045e-16	9.41863e-15	-1.4233	-3.43515	GC_LAR	Cpne9	copine family member IX	211232
ENSMUSG00000024008	18	18	10	8	0.101911	4.68935	4.55352	6.42856	6.29101	28.625	24.2	No	28.6423	22.2617	25.0975	-0.300967	0.210391	2.08919	0.000388096	0.0036622	-0.0905758	-0.511358	GC_LAR	Cpne5	copine V	240058
ENSMUSG00000052560	18	18	10	8	0.0973911	8.93101	9.11114	9.07927	9.32272	557	631.5	No	488.734	576.569	537.531	0.234887	0.17724	1.749	0.0029749	0.0220261	0.412126	0.0576467	FLT_LAR	Cpne8	copine VIII	66871
ENSMUSG00000030707	18	18	10	8	0.143829	10.402	10.1928	10.527	10.2342	1623.88	1244.9	No	1474.67	1156.61	1297.97	-0.351071	0.195188	3.25722	3.17119e-08	6.16857e-07	-0.155882	-0.546259	GC_LAR	Coro1a	coronin, actin binding protein 1A	12721
ENSMUSG00000028337	18	18	10	8	0.0867995	13.2251	13.4353	13.1771	13.4859	10343.8	12487.8	No	9392.25	11589	10612.6	0.302992	0.147504	4.17995	1.25877e-12	3.89006e-11	0.450496	0.155488	FLT_LAR	Coro2a	coronin, actin binding protein 2A	107684
ENSMUSG00000037942	18	18	10	8	0.328244	2.73027	2.50904	5.89635	5.64807	10.375	4.8	No	11.6584	5.35794	8.15816	-1.12739	0.768979	2.13352	0.000290831	0.00282026	-0.358412	-1.89637	GC_LAR	Crp	C-reactive protein, pentraxin-related	12944
ENSMUSG00000021622	18	18	10	8	0.0928805	7.58065	8.13292	7.87747	8.5644	193.875	333.7	No	173.552	313.713	251.419	0.842345	0.187372	19.6894	2.22045e-16	9.41863e-15	1.02972	0.654972	FLT_LAR	Ckmt2	creatine kinase, mitochondrial 2	76722
ENSMUSG00000063681	18	14	7	7	0.676471	2.14239	2.13424	5.64395	5.5469	3.375	7.5	No	6.41902	8.84208	3.25803	-3.0126	0.987289	9.38417	2.22045e-16	9.41863e-15	-2.02531	-3.99989	GC_LAR	Crb1	crumbs family member 1, photoreceptor morphogenesis associated	170788
ENSMUSG00000035403	18	18	10	8	0.0953815	5.61041	5.77839	6.74088	6.91195	48	61.2	No	46.5312	59.4923	53.7318	0.359917	0.203671	3.09603	1.45652e-07	2.60579e-06	0.563588	0.156246	FLT_LAR	Crb2	crumbs family member 2	241324
ENSMUSG00000020038	18	18	10	8	0.0931674	9.80808	10.2311	9.80217	10.3995	977.25	1379.9	No	864.514	1303.01	1108.12	0.589196	0.196048	8.85183	2.22045e-16	9.41863e-15	0.785244	0.393148	FLT_LAR	Cry1	cryptochrome 1 (photolyase-like)	12952
ENSMUSG00000019866	18	18	10	8	0.0866065	11.9875	12.162	11.9651	12.2197	4384.38	5100.4	No	3976.48	4738.8	4399.99	0.25195	0.11614	4.67296	1.9984e-15	7.95098e-14	0.36809	0.135809	FLT_LAR	Crybg1	crystallin beta-gamma domain containing 1	11630
ENSMUSG00000066975	18	16	9	7	0.116279	2.7181	2.61272	5.81346	5.71295	8.875	5.8	No	7.96897	5.29028	6.48081	-0.634984	0.409942	2.48083	2.51805e-05	0.000310175	-0.225042	-1.04493	GC_LAR	Cryba4	crystallin, beta A4	12959
ENSMUSG00000029352	18	18	10	8	0.144928	4.55307	4.37321	6.39611	6.22034	27.125	19.7	No	33.583	20.1921	26.1436	-0.706111	0.490479	2.07261	0.000431722	0.00403191	-0.215632	-1.19659	GC_LAR	Crybb3	crystallin, beta B3	12962
ENSMUSG00000033323	18	18	10	8	0.0838906	10.251	10.3295	10.3135	10.4242	1304.75	1423.7	No	1204.76	1312.39	1264.56	0.121821	0.0958912	1.61234	0.00617707	0.0411163	0.217712	0.02593	FLT_LAR	Ctdp1	CTD (carboxy-terminal domain, RNA polymerase II, polypeptide A) phosphatase, subunit 1	67655
ENSMUSG00000026176	18	18	10	8	0.0843241	11.8779	11.921	11.8945	11.9567	3966.88	4211.1	No	3736.24	3910.52	3833.06	0.0660233	0.052545	1.57711	0.00739771	0.0482042	0.118568	0.0134784	FLT_LAR	Ctdsp1	CTD (carboxy-terminal domain, RNA polymerase II, polypeptide A) small phosphatase 1	227292
ENSMUSG00000004473	18	18	10	8	0.0853778	6.63382	6.76442	7.32987	7.47733	104.375	120.3	No	96.0122	113.57	105.767	0.229501	0.13764	2.78027	2.33873e-06	3.47689e-05	0.367142	0.0918609	FLT_LAR	Clec11a	C-type lectin domain family 11, member a	20256
ENSMUSG00000068663	18	18	10	8	0.0769536	10.5889	10.6685	10.6346	10.748	1602.5	1744.5	No	1520.77	1653.15	1594.31	0.120065	0.0722947	2.74908	3.03056e-06	4.4229e-05	0.19236	0.0477705	FLT_LAR	Clec16a	C-type lectin domain family 16, member A	74374
ENSMUSG00000033633	18	14	7	7	0.176471	0.769203	0.709584	5.53033	5.41279	2.625	1.3	No	2.36103	1.14589	1.68595	-1.05564	0.732097	2.16237	0.000240342	0.00237176	-0.323548	-1.78774	GC_LAR	Clec18a	C-type lectin domain family 18, member A	353287
ENSMUSG00000030155	18	18	10	8	0.0973124	9.74833	9.51054	9.92333	9.59471	969.125	765.1	No	925.635	737.162	820.928	-0.328122	0.215056	2.34144	6.99537e-05	0.000777562	-0.113066	-0.543178	GC_LAR	Clec2e	C-type lectin domain family 2, member e	232409
ENSMUSG00000030364	18	18	10	8	0.113201	13.5066	13.3815	13.5412	13.3626	13155.1	11217.7	No	12356.8	10639.1	11402.5	-0.215934	0.175462	1.5215	0.0097677	0.0610398	-0.040472	-0.391396	GC_LAR	Clec2h	C-type lectin domain family 2, member h	94071
ENSMUSG00000049037	18	18	10	8	0.10523	6.38969	6.21216	7.25836	7.07238	101.375	77.6	No	90.0597	71.9352	79.9905	-0.347579	0.168914	4.32017	2.18492e-13	7.23692e-12	-0.178664	-0.516493	GC_LAR	Clec4a1	C-type lectin domain family 4, member a1	269799
ENSMUSG00000043832	18	18	10	8	0.110652	6.03331	5.76402	7.08257	6.80402	81.625	55.8	No	73.2846	51.0516	60.933	-0.528144	0.189786	7.85768	2.22045e-16	9.41863e-15	-0.338358	-0.717929	GC_LAR	Clec4a3	C-type lectin domain family 4, member a3	73149
ENSMUSG00000014542	18	12	6	6	0.34375	0.708502	0.637719	5.49703	5.38921	2.75	1	No	2.57156	1.04162	1.7216	-1.40851	0.933207	2.29741	9.55329e-05	0.001028	-0.475303	-2.34172	GC_LAR	Clec4f	C-type lectin domain family 4, member f	51811
ENSMUSG00000023349	18	18	10	8	0.129545	7.51411	7.26747	8.0379	7.74424	212.375	157.4	No	198.88	149.993	171.721	-0.405746	0.180737	5.06662	2.22045e-16	9.41863e-15	-0.22501	-0.586483	GC_LAR	Clec4n	C-type lectin domain family 4, member n	56620
ENSMUSG00000046080	18	18	10	8	0.113288	6.54529	6.27708	7.38633	7.09491	108.125	76.8	No	105.994	74.8952	88.7168	-0.500617	0.230852	4.72146	1.11022e-15	4.55503e-14	-0.269764	-0.731469	GC_LAR	Clec9a	C-type lectin domain family 9, member a	232414
ENSMUSG00000035498	18	18	10	8	0.0764952	11.7487	11.8946	11.7399	11.9521	3622.12	4131.5	No	3356.93	3899.61	3658.42	0.214278	0.0664079	10.3561	2.22045e-16	9.41863e-15	0.280685	0.14787	FLT_LAR	Cdcp1	CUB domain containing protein 1	109332
ENSMUSG00000028137	18	18	10	8	0.0781513	7.44983	7.59789	7.88719	8.06606	183	210.6	No	173.517	200.773	188.659	0.200822	0.157093	1.62877	0.00567249	0.0382221	0.357914	0.0437292	FLT_LAR	Celf3	CUGBP, Elav-like family member 3	78784
ENSMUSG00000032297	18	18	10	8	0.101569	7.37826	7.58068	7.81892	8.06391	175.875	222.6	No	160.656	201.899	183.569	0.321663	0.152955	4.42241	5.88418e-14	2.03884e-12	0.474618	0.168708	FLT_LAR	Celf6	CUGBP, Elav-like family member 6	76183
ENSMUSG00000038545	18	18	10	8	0.0971098	9.61844	9.7385	9.71213	9.8793	839.375	972	No	774.92	886.503	836.91	0.192543	0.140204	1.87903	0.00141715	0.0115493	0.332747	0.0523384	FLT_LAR	Cul7	cullin 7	66515
ENSMUSG00000042589	18	18	10	8	0.103745	6.1752	6.42057	7.02498	7.28907	73.5	104.1	No	69.5546	96.6263	84.5945	0.470093	0.271971	2.95354	5.27633e-07	8.70529e-06	0.742064	0.198121	FLT_LAR	Cux2	cut-like homeobox 2	13048
ENSMUSG00000021715	18	18	10	8	0.0852432	9.04073	9.12234	9.20229	9.3131	571.75	616	No	520.444	567.623	546.654	0.117106	0.0898428	1.7208	0.00347327	0.0252052	0.206949	0.0272634	FLT_LAR	Cwc27	CWC27 spliceosome-associated protein	67285
ENSMUSG00000025200	18	18	10	8	0.0929038	8.80717	8.9214	8.98922	9.14241	492.75	540.1	No	442.076	496.198	472.144	0.158834	0.107292	2.2041	0.00018169	0.00184276	0.266126	0.051542	FLT_LAR	Cwf19l1	CWF19-like 1, cell cycle control (S. pombe)	72502
ENSMUSG00000025898	18	18	10	8	0.0769019	10.3395	10.4184	10.3976	10.5085	1354.62	1461.1	No	1278.77	1397.88	1344.94	0.126612	0.0955822	1.74878	0.00297852	0.0220405	0.222194	0.0310297	FLT_LAR	Cwf19l2	CWF19-like 2, cell cycle control (S. pombe)	244672
ENSMUSG00000032503	18	18	10	8	0.124224	4.21738	4.00876	6.29568	6.08334	20.75	15.6	No	29.7575	14.8276	21.4631	-0.910286	0.480816	3.59888	9.84247e-10	2.30198e-08	-0.42947	-1.3911	GC_LAR	Arpp21	cyclic AMP-regulated phosphoprotein, 21	74100
ENSMUSG00000067220	18	13	7	6	0.192308	0.681021	0.621585	5.49994	5.41131	1.75	1.2	No	2.97589	1.14792	1.96035	-1.00532	0.923525	1.47636	0.0121659	0.0734677	-0.0817953	-1.92885	GC_LAR	Cnga1	cyclic nucleotide gated channel alpha 1	12788
ENSMUSG00000005864	18	12	7	5	0.181818	0.496842	0.43054	5.47852	5.3898	1.625	0.9	No	2.69187	0.905738	1.69958	-1.30294	1.00335	1.89123	0.00131874	0.0108414	-0.299596	-2.30629	GC_LAR	Cnga2	cyclic nucleotide gated channel alpha 2	12789
ENSMUSG00000041431	18	18	10	8	0.153423	9.31601	8.96992	9.55176	9.08596	904.875	639	No	780.817	539.741	646.886	-0.532299	0.369933	2.08806	0.000390928	0.00368627	-0.162366	-0.902232	GC_LAR	Ccnb1	cyclin B1	268697
ENSMUSG00000096472	18	18	10	8	0.0920017	7.94724	7.75146	8.3547	8.11256	284.125	230.3	No	260.322	210.655	232.729	-0.307886	0.135192	5.23294	2.22045e-16	9.41863e-15	-0.172694	-0.443078	GC_LAR	Cdkn2d	cyclin dependent kinase inhibitor 2D	12581
ENSMUSG00000062234	18	18	10	8	0.0807927	12.9836	13.0391	12.9818	13.0628	8667.5	9118.2	No	8031.77	8505.53	8294.97	0.0820069	0.0607227	1.82078	0.00198668	0.0155129	0.14273	0.0212842	FLT_LAR	Gak	cyclin G associated kinase	231580
ENSMUSG00000025010	18	18	10	8	0.0800303	8.05817	8.13077	8.3748	8.46691	279.125	304	No	263.101	284.592	275.04	0.113335	0.0793731	2.03675	0.000542177	0.00494236	0.192708	0.0339614	FLT_LAR	Ccnj	cyclin J	240665
ENSMUSG00000044707	18	18	10	8	0.0951493	6.99202	7.1214	7.56364	7.7173	139	156.8	No	124.776	145.245	136.148	0.199882	0.15551	1.67424	0.00446431	0.0311342	0.355392	0.0443723	FLT_LAR	Ccnjl	cyclin J-like	380694
ENSMUSG00000037408	18	18	10	8	0.0846458	14.1936	14.3153	14.166	14.3439	19868.2	22716.9	No	18390.9	21002.5	19841.8	0.191485	0.109281	3.05331	2.15529e-07	3.75627e-06	0.300766	0.0822036	FLT_LAR	Cnnm4	cyclin M4	94220
ENSMUSG00000078653	18	18	10	8	0.0942668	6.67891	6.42658	7.46332	7.18969	114.875	89.5	No	112.391	85.9236	97.6867	-0.382425	0.237656	2.59953	1.01124e-05	0.000134384	-0.144769	-0.620081	GC_LAR	Cntd1	cyclin N-terminal domain containing 1	68107
ENSMUSG00000041297	18	18	10	8	0.0825318	11.9608	12.0469	11.9642	12.0893	4189.38	4529.1	No	3930.35	4297.22	4134.17	0.127798	0.064309	3.93592	2.31954e-11	6.39431e-10	0.192107	0.0634894	FLT_LAR	Cdk13	cyclin-dependent kinase 13	69562
ENSMUSG00000026437	18	18	10	8	0.0813627	9.40356	9.51323	9.52066	9.67059	702.25	791.4	No	665.697	757.139	716.498	0.184746	0.12963	2.02051	0.000600427	0.0054022	0.314376	0.0551153	FLT_LAR	Cdk18	cyclin-dependent kinase 18	18557
ENSMUSG00000009555	18	18	10	8	0.083281	10.5849	10.5077	10.6716	10.5618	1645.5	1549.8	No	1567.55	1441.41	1497.47	-0.117378	0.0753352	2.43298	3.59745e-05	0.000426938	-0.0420426	-0.192713	GC_LAR	Cdk9	cyclin-dependent kinase 9 (CDC2-related kinase)	107951
ENSMUSG00000037664	18	18	10	8	0.0941799	7.77153	7.92849	8.12702	8.32249	242.375	278.6	No	215.212	254.502	237.04	0.235058	0.162529	2.09235	0.000380256	0.00359337	0.397587	0.0725284	FLT_LAR	Cdkn1c	cyclin-dependent kinase inhibitor 1C (P57)	12577
ENSMUSG00000037628	18	18	10	8	0.116162	7.02707	6.84887	7.67992	7.47099	162.25	127.6	No	149.183	115.508	130.475	-0.364235	0.278843	1.71677	0.00355031	0.0256722	-0.0853921	-0.643079	GC_LAR	Cdkn3	cyclin-dependent kinase inhibitor 3	72391
ENSMUSG00000031292	18	18	10	8	0.0896327	8.76367	8.88436	8.95066	9.1114	462.375	520.4	No	429.046	484.918	460.086	0.173948	0.116821	2.2118	0.000172455	0.00175858	0.290768	0.0571269	FLT_LAR	Cdkl5	cyclin-dependent kinase-like 5	382253
ENSMUSG00000026421	18	18	10	8	0.106866	14.9751	14.8237	15.0144	14.7926	36336.2	31441.3	No	33710.6	28782.4	30972.7	-0.228008	0.145463	2.46885	2.7549e-05	0.000335733	-0.082545	-0.373471	GC_LAR	Csrp1	cysteine and glycine-rich protein 1	13007
ENSMUSG00000024074	18	18	10	8	0.0934938	11.853	11.975	11.8477	12.0249	3994.25	4500.3	No	3652.85	4132.32	3919.22	0.177119	0.113146	2.43949	3.42847e-05	0.000409099	0.290265	0.0639733	FLT_LAR	Crim1	cysteine rich transmembrane BMP regulator 1 (chordin like)	50766
ENSMUSG00000023257	18	11	4	7	0.255814	1.04593	0.93855	5.59074	5.35133	3.875	1.2	No	3.20675	1.16895	2.07464	-1.52483	0.912523	2.8779	1.02116e-06	1.60908e-05	-0.612308	-2.43735	GC_LAR	Cypt1	cysteine-rich perinuclear theca 1	66742
ENSMUSG00000025431	18	12	4	8	0.189189	1.08327	0.943922	5.6424	5.34397	3.5	0.9	No	3.88133	0.907955	2.22945	-2.0867	0.845198	6.24064	2.22045e-16	9.41863e-15	-1.2415	-2.9319	GC_LAR	Crisp1	cysteine-rich secretory protein 1	11571
ENSMUSG00000023930	18	16	8	8	0.122449	1.43216	1.35949	5.64183	5.49404	3.5	2.1	No	3.6796	2.071	2.78593	-0.778196	0.640937	1.50684	0.010496	0.0647509	-0.137259	-1.41913	GC_LAR	Crisp2	cysteine-rich secretory protein 2	22024
ENSMUSG00000031825	18	18	10	8	0.116724	10.8815	11.1853	10.8498	11.2865	2086.38	2832.1	No	1840.14	2541.28	2229.66	0.464774	0.212889	4.69361	1.55431e-15	6.28875e-14	0.677663	0.251884	FLT_LAR	Crispld2	cysteine-rich secretory protein LCCL domain containing 2	78892
ENSMUSG00000030284	18	18	10	8	0.087102	8.75205	8.64679	8.99866	8.85999	470	431.1	No	442.459	397.761	417.627	-0.154558	0.107914	2.06176	0.000462682	0.00428756	-0.0466439	-0.262473	GC_LAR	Creld1	cysteine-rich with EGF-like domains 1	171508
ENSMUSG00000032515	18	18	10	8	0.0986092	8.91353	8.74607	9.15536	8.9321	538.625	446.3	No	501.584	419.278	455.859	-0.263266	0.0904943	8.50919	2.22045e-16	9.41863e-15	-0.172772	-0.353761	GC_LAR	Csrnp1	cysteine-serine-rich nuclear protein 1	215418
ENSMUSG00000044636	18	18	10	8	0.0904692	7.8617	7.95859	8.21136	8.33433	251.25	274.3	No	229.1	255.121	243.557	0.143589	0.113878	1.606	0.00638253	0.0422603	0.257467	0.0297115	FLT_LAR	Csrnp2	cysteine-serine-rich nuclear protein 2	207785
ENSMUSG00000044647	18	18	10	8	0.116052	5.40583	5.55291	6.64717	6.79071	43	57.8	No	40.9307	51.2084	46.6405	0.353818	0.241924	2.12405	0.000309454	0.00297345	0.595741	0.111894	FLT_LAR	Csrnp3	cysteine-serine-rich nuclear protein 3	77771
ENSMUSG00000028755	18	18	10	8	0.101135	8.99646	8.88757	9.21268	9.06713	572.25	511.2	No	531.692	470.633	497.77	-0.175632	0.141968	1.53722	0.00903687	0.0572538	-0.0336637	-0.3176	GC_LAR	Cda	cytidine deaminase	72269
ENSMUSG00000039294	18	18	10	8	0.0958231	10.2469	10.155	10.3539	10.225	1309.75	1190.7	No	1245.54	1125.71	1178.97	-0.143036	0.0797489	3.22573	4.29606e-08	8.23484e-07	-0.0632873	-0.222785	GC_LAR	Cybc1	cytochrome b 245 chaperone 1	217370
ENSMUSG00000028621	18	18	10	8	0.0817299	8.16751	8.24042	8.46319	8.55619	298.625	327.6	No	283.994	306.552	296.526	0.114991	0.0738219	2.42116	3.92526e-05	0.000463956	0.188813	0.0411688	FLT_LAR	Cyb5rl	cytochrome b5 reductase-like	230582
ENSMUSG00000032323	18	18	10	8	0.144025	5.30656	5.6197	6.55865	6.87099	39.5	66.3	No	39.1194	64.6246	53.289	0.721032	0.454867	2.44895	3.19591e-05	0.000384313	1.1759	0.266165	FLT_LAR	Cyp11a1	cytochrome P450, family 11, subfamily a, polypeptide 1	13070
ENSMUSG00000003555	18	14	7	7	0.315789	1.94616	1.6852	5.76575	5.42768	7.5	1.6	No	7.8874	1.37048	4.26689	-2.44272	0.779961	9.96458	2.22045e-16	9.41863e-15	-1.66276	-3.22268	GC_LAR	Cyp17a1	cytochrome P450, family 17, subfamily a, polypeptide 1	13074
ENSMUSG00000060407	18	17	10	7	0.406091	3.30248	2.88613	6.07143	5.69649	18.75	4.7	No	20.5681	4.94024	11.886	-2.07225	0.678656	9.10638	2.22045e-16	9.41863e-15	-1.39359	-2.7509	GC_LAR	Cyp2a12	cytochrome P450, family 2, subfamily a, polypeptide 12	13085
ENSMUSG00000074254	18	15	7	8	0.45	3.26634	2.54321	6.17596	5.45861	22.75	1.8	No	24.6002	1.86417	11.9691	-3.7606	0.794079	20.8782	2.22045e-16	9.41863e-15	-2.96652	-4.55468	GC_LAR	Cyp2a4	cytochrome P450, family 2, subfamily a, polypeptide 4	13086
ENSMUSG00000005547	18	18	10	8	0.598152	3.81302	3.41305	6.36703	5.75126	46.625	6	No	47.9478	5.87168	10.1913	-1.40386	0.521372	7.24859	2.22045e-16	9.41863e-15	-0.882487	-1.92523	GC_LAR	Cyp2a5	cytochrome P450, family 2, subfamily a, polypeptide 5	13087
ENSMUSG00000040583	18	12	5	7	0.362319	1.82207	1.63118	5.71956	5.41772	6.125	2	No	6.65095	2.05634	4.09839	-1.69066	0.992093	2.8744	1.05246e-06	1.65245e-05	-0.698563	-2.68275	GC_LAR	Cyp2b13	cytochrome P450, family 2, subfamily b, polypeptide 13	13089
ENSMUSG00000040660	18	16	9	7	0.431694	3.11504	2.67047	6.02998	5.61005	17.625	4.2	No	20.2325	4.30605	11.3845	-2.23525	0.842129	6.82675	2.22045e-16	9.41863e-15	-1.39312	-3.07738	GC_LAR	Cyp2b9	cytochrome P450, family 2, subfamily b, polypeptide 9	13094
ENSMUSG00000025197	18	18	10	8	0.117433	5.51525	5.19037	6.83329	6.51287	58	36.2	No	54.1893	33.7734	42.8471	-0.691249	0.262647	6.99485	2.22045e-16	9.41863e-15	-0.428602	-0.953896	GC_LAR	Cyp2c23	cytochrome P450, family 2, subfamily c, polypeptide 23	226143
ENSMUSG00000003053	18	14	8	6	0.557292	2.79945	2.35658	5.98361	5.52448	20.625	2.7	No	21.174	2.70103	10.9113	-2.9825	0.919628	9.92544	2.22045e-16	9.41863e-15	-2.06287	-3.90213	GC_LAR	Cyp2c29	cytochrome P450, family 2, subfamily c, polypeptide 29	13095
ENSMUSG00000054827	18	16	8	8	0.444444	2.8952	2.60649	5.93654	5.62212	15.75	4.5	No	15.5621	4.89069	9.63352	-1.70021	0.848774	3.96676	1.6201e-11	4.53267e-10	-0.851431	-2.54898	GC_LAR	Cyp2c50	cytochrome P450, family 2, subfamily c, polypeptide 50	107141
ENSMUSG00000067225	18	11	6	5	0.5	1.5105	1.37756	5.5683	5.43196	5.75	2	No	5.7473	1.94	3.63213	-1.58399	1.13756	1.94134	0.000977381	0.00832653	-0.446431	-2.72156	GC_LAR	Cyp2c54	cytochrome P450, family 2, subfamily c, polypeptide 54	404195
ENSMUSG00000025002	18	18	10	8	0.191789	12.8102	13.2463	12.665	13.3245	8644.25	12954.4	No	7618.98	12277.9	10207.2	0.688363	0.394654	2.96242	4.87789e-07	8.10383e-06	1.08302	0.293709	FLT_LAR	Cyp2c55	cytochrome P450, family 2, subfamily c, polypeptide 55	72082
ENSMUSG00000067229	18	10	6	4	0.238095	0.0265478	0.0692973	5.32493	5.42046	0.625	1.6	No	0.513916	1.46461	1.04208	1.31054	1.06677	1.65908	0.00483825	0.0333616	2.3773	0.243774	FLT_LAR	Cyp2c66	cytochrome P450, family 2, subfamily c, polypeptide 66	69888
ENSMUSG00000060613	18	18	10	8	0.131922	5.66418	6.0219	6.71097	7.08165	52.5	80.8	No	48.1214	74.121	62.5656	0.609321	0.302324	4.01161	9.5659e-12	2.73153e-10	0.911645	0.306996	FLT_LAR	Cyp2c70	cytochrome P450, family 2, subfamily c, polypeptide 70	226105
ENSMUSG00000116368	18	10	4	6	0.25	0.1567	0.104491	5.47041	5.33002	1.625	0.7	No	1.94423	0.723341	1.26596	-1.29834	1.09709	1.44977	0.0138113	0.08177	-0.201254	-2.39543	GC_LAR	Cyp2d33-ps	cytochrome P450, family 2, subfamily d, polypeptide 33, pseudogene	100125411
ENSMUSG00000028571	18	18	10	8	0.0916031	3.90992	3.75029	6.17927	6.01257	16.625	12.9	No	19.029	12.2499	15.2628	-0.503113	0.316883	2.78317	2.2826e-06	3.40306e-05	-0.186231	-0.819996	GC_LAR	Cyp2j13	cytochrome P450, family 2, subfamily j, polypeptide 13	230459
ENSMUSG00000027983	18	18	10	8	0.0917856	8.77478	8.60674	9.03448	8.8132	478.125	416.1	No	456.734	389.396	419.324	-0.230219	0.156569	2.17146	0.00022623	0.00224345	-0.0736502	-0.386788	GC_LAR	Cyp2u1	cytochrome P450, family 2, subfamily u, polypeptide 1	71519
ENSMUSG00000029727	18	18	10	8	0.087756	12.3979	12.6117	12.3513	12.6705	6070	6895.9	No	5464.99	6542.98	6063.88	0.259368	0.19228	1.80542	0.00216852	0.0167932	0.451648	0.0670886	FLT_LAR	Cyp3a13	cytochrome P450, family 3, subfamily a, polypeptide 13	13113
ENSMUSG00000029630	18	16	10	6	0.386667	2.73857	2.58982	5.79022	5.72011	12	5.4	No	11.5811	4.99216	7.9206	-1.22909	0.686777	3.23988	3.74936e-08	7.22907e-07	-0.542309	-1.91586	GC_LAR	Cyp3a25	cytochrome P450, family 3, subfamily a, polypeptide 25	56388
ENSMUSG00000075551	18	18	10	8	0.569815	5.19313	4.26355	6.87095	6.04794	102.5	15.4	No	109.228	15.3323	57.0639	-2.83601	0.711604	14.832	2.22045e-16	9.41863e-15	-2.12441	-3.54761	GC_LAR	Cyp3a41a	cytochrome P450, family 3, subfamily a, polypeptide 41A	53973
ENSMUSG00000054417	18	10	4	6	0.623377	1.68316	1.37652	5.70623	5.34196	8.5	0.9	No	9.18769	0.863073	4.5629	-3.4094	1.15491	8.3141	2.22045e-16	9.41863e-15	-2.25449	-4.56431	GC_LAR	Cyp3a44	cytochrome P450, family 3, subfamily a, polypeptide 44	337924
ENSMUSG00000028713	18	18	10	8	0.0945175	8.37421	8.63829	8.58304	8.92748	362.5	463.3	No	323.678	423.821	379.313	0.385634	0.180086	4.54316	1.19904e-14	4.44761e-13	0.565719	0.205548	FLT_LAR	Cyp4b1	cytochrome P450, family 4, subfamily b, polypeptide 1	13120
ENSMUSG00000024292	18	18	10	8	0.0941463	12.2514	12.4909	12.2012	12.5542	5272.12	6546.4	No	4872.18	6132.13	5572.15	0.331894	0.204643	2.60252	9.87768e-06	0.000131864	0.536537	0.127251	FLT_LAR	Cyp4f14	cytochrome P450, family 4, subfamily f, polypeptide 14	64385
ENSMUSG00000073424	18	17	9	8	0.327869	1.71217	1.6154	5.67042	5.53339	4.625	2.4	No	5.10012	2.50967	3.66098	-1.02753	0.736601	1.94034	0.000983317	0.00836631	-0.290932	-1.76413	GC_LAR	Cyp4f15	cytochrome P450, family 4, subfamily f, polypeptide 15	106648
ENSMUSG00000048440	18	18	10	8	0.0904821	11.5947	11.8494	11.5558	11.9269	3357	4127.9	No	3055.02	3926.85	3539.37	0.36156	0.188372	3.64195	6.20668e-10	1.48121e-08	0.549931	0.173188	FLT_LAR	Cyp4f16	cytochrome P450, family 4, subfamily f, polypeptide 16	70101
ENSMUSG00000003484	18	18	10	8	0.0937585	7.63529	7.49006	8.1008	7.92588	223.25	188.3	No	208.169	177.087	190.901	-0.238048	0.139656	2.92183	6.97246e-07	1.12565e-05	-0.0983922	-0.377703	GC_LAR	Cyp4f18	cytochrome P450, family 4, subfamily f, polypeptide 18	72054
ENSMUSG00000090700	18	18	10	8	0.0925576	10.2836	10.5005	10.3054	10.6142	1376.38	1650.7	No	1221.84	1516.48	1385.53	0.309283	0.149942	4.21996	7.68052e-13	2.42485e-11	0.459225	0.159341	FLT_LAR	Cyp4f40	cytochrome P450, family 4, subfamily f, polypeptide 40	631304
ENSMUSG00000024295	18	18	10	8	0.0988235	4.56235	4.3919	6.39129	6.22267	27.25	20.7	No	26.9454	19.962	23.0658	-0.423286	0.269779	2.47746	2.58263e-05	0.000317238	-0.153507	-0.693066	GC_LAR	Cyp4f41-ps	cytochrome P450, family 4, subfamily f, polypeptide 41 pseudogene	77875
ENSMUSG00000028240	18	13	6	7	0.455696	1.91529	1.66032	5.74611	5.42235	7.875	1.6	No	8.35441	1.54721	4.57263	-2.43104	0.920637	6.86267	2.22045e-16	9.41863e-15	-1.5104	-3.35167	GC_LAR	Cyp7a1	cytochrome P450, family 7, subfamily a, polypeptide 1	13122
ENSMUSG00000026832	18	18	10	8	0.111889	9.68031	9.51031	9.84473	9.6086	973.25	764	No	870.346	720.759	787.242	-0.275097	0.161247	2.92958	6.51504e-07	1.05765e-05	-0.11385	-0.436344	GC_LAR	Cytip	cytohesin 1 interacting protein	227929
ENSMUSG00000018001	18	18	10	8	0.0841856	10.7116	10.7998	10.7491	10.8757	1805.88	1928.8	No	1656.24	1812.92	1743.29	0.126928	0.0798614	2.52238	1.83774e-05	0.000233144	0.206789	0.0470667	FLT_LAR	Cyth3	cytohesin 3	19159
ENSMUSG00000018008	18	18	10	8	0.0912216	9.48618	9.34752	9.65984	9.46913	795.625	672.4	No	742.077	640.665	685.737	-0.216401	0.0982986	4.86853	2.22045e-16	9.41863e-15	-0.118102	-0.314699	GC_LAR	Cyth4	cytohesin 4	72318
ENSMUSG00000007888	18	18	10	8	0.376126	4.06967	4.14053	6.10526	6.20122	19.125	29.1	No	16.6725	30.5415	14.1039	-0.474607	0.387557	1.53847	0.00898113	0.0569693	-0.0870499	-0.862165	GC_LAR	Crlf1	cytokine receptor-like factor 1	12931
ENSMUSG00000095975	18	11	6	5	0.383562	3.06183	2.65023	5.90911	5.54019	21.875	4.4	No	17.2893	5.41218	10.6909	-1.69866	1.41186	1.42918	0.0152176	0.088856	-0.286803	-3.11052	GC_LAR	Cphx1	cytoplasmic polyadenylated homeobox 1	105594
ENSMUSG00000105540	18	8	3	5	0.166667	-0.502398	-0.542308	5.41549	5.28575	1	0.4	No	1.2991	0.410511	0.80544	-1.50306	1.26659	1.44266	0.0142836	0.084112	-0.236471	-2.76966	GC_LAR	Gm7988	cytoskeleton associated protein 2 pseudogene	666223
ENSMUSG00000031879	18	18	10	8	0.11532	10.0476	9.95119	10.1655	10.0327	1192.12	1055.5	No	1111.44	980.531	1038.71	-0.180079	0.14793	1.48747	0.0115318	0.0702023	-0.0321489	-0.328009	GC_LAR	Ciao2b	cytosolic iron-sulfur assembly component 2B	68523
ENSMUSG00000049482	18	18	10	8	0.082195	8.74106	8.86283	8.93175	9.09307	433.375	502.5	No	419.692	477.227	451.656	0.191254	0.0936216	4.14985	1.81943e-12	5.53171e-11	0.284875	0.0976322	FLT_LAR	Ctu2	cytosolic thiouridylase subunit 2	66965
ENSMUSG00000032021	18	18	10	8	0.159763	3.28688	3.09272	6.01892	5.81694	11.875	7.4	No	14.8945	7.23929	10.6416	-0.935536	0.494339	3.63804	6.47342e-10	1.54347e-08	-0.441196	-1.42988	GC_LAR	Crtam	cytotoxic and regulatory T cell molecule	54698
ENSMUSG00000074874	18	18	10	8	0.122159	5.3223	5.05633	6.73099	6.46961	47.875	32.1	No	46.7553	32.0016	38.5588	-0.540875	0.281972	3.69408	3.52727e-10	8.68575e-09	-0.258903	-0.822847	GC_LAR	Ctla2b	cytotoxic T lymphocyte-associated protein 2 beta	13025
ENSMUSG00000026011	18	18	10	8	0.120658	4.88609	4.71248	6.50934	6.34668	36.75	25.3	No	33.5475	25.0597	28.8321	-0.458375	0.264892	3.01001	3.18961e-07	5.43993e-06	-0.193484	-0.723267	GC_LAR	Ctla4	cytotoxic T-lymphocyte-associated protein 4	12477
ENSMUSG00000059824	18	18	10	8	0.110035	11.5174	10.7881	11.7283	10.6655	3674	2160.1	No	3419.55	1833.23	2538.26	-0.899205	0.318454	8.03019	2.22045e-16	9.41863e-15	-0.580751	-1.21766	GC_LAR	Dbp	D site albumin promoter binding protein	13170
ENSMUSG00000024442	18	18	10	8	0.0843897	10.7901	10.8936	10.8205	10.9691	1894.5	2097.4	No	1741.2	1937.06	1850.01	0.15035	0.067936	4.89488	2.22045e-16	9.41863e-15	0.218286	0.0824142	FLT_LAR	Dele1	DAP3 binding cell death enhancer 1	66839
ENSMUSG00000031562	18	18	10	8	0.10389	8.16419	8.4512	8.4036	8.77389	324	411.7	No	282.915	375.753	334.492	0.403175	0.211052	3.61566	8.22892e-10	1.93571e-08	0.614227	0.192123	FLT_LAR	Dctd	dCMP deaminase	320685
ENSMUSG00000042672	18	18	10	8	0.0799419	5.24222	5.13905	6.64245	6.54186	41.625	35.5	No	39.9839	34.515	36.9456	-0.226403	0.17521	1.69976	0.00389322	0.0277775	-0.0511932	-0.401614	GC_LAR	Dcst1	DC-STAMP domain containing 1	77772
ENSMUSG00000037103	18	18	10	8	0.0845542	9.92486	9.9904	10.0115	10.1031	1011.75	1101.8	No	961.384	1032.09	1000.66	0.103336	0.0745775	1.91472	0.00114692	0.00960295	0.177914	0.0287587	FLT_LAR	Dcaf15	DDB1 and CUL4 associated factor 15	212123
ENSMUSG00000049106	18	18	10	8	0.0815913	11.1156	11.1774	11.1456	11.2349	2364.38	2504.8	No	2201.07	2342.48	2279.63	0.0875811	0.0687856	1.6204	0.00592492	0.0396891	0.156367	0.0187955	FLT_LAR	Dcaf5	DDB1 and CUL4 associated factor 5	320808
ENSMUSG00000061313	18	18	10	8	0.0813316	10.0853	10.1972	10.1486	10.3068	1154.25	1266.4	No	1066.14	1197.42	1139.07	0.160853	0.0696469	5.32529	2.22045e-16	9.41863e-15	0.2305	0.0912061	FLT_LAR	Ddhd2	DDHD domain containing 2	72108
ENSMUSG00000027905	18	18	10	8	0.0948983	9.51372	9.67024	9.60636	9.82377	821.625	926.5	No	724.602	845.467	791.75	0.218771	0.150525	2.10458	0.000351301	0.00334015	0.369297	0.0682462	FLT_LAR	Ddx20	DEAD box helicase 20	53975
ENSMUSG00000020705	18	18	10	8	0.0881342	11.5309	11.6413	11.5347	11.6961	3275.5	3515.7	No	2938.33	3263.88	3119.19	0.149777	0.112448	1.76847	0.00266992	0.0201077	0.262225	0.0373287	FLT_LAR	Ddx42	DEAD box helicase 42	72047
ENSMUSG00000042426	18	18	10	8	0.0971413	9.7364	9.87961	9.81389	10.0138	963.375	1083.3	No	851.2	987.13	926.717	0.211585	0.177929	1.40756	0.0168281	0.0967983	0.389515	0.0336556	FLT_LAR	Dhx29	DEAH (Asp-Glu-Ala-His) box polypeptide 29	218629
ENSMUSG00000040620	18	18	10	8	0.0849057	10.3448	10.4782	10.3877	10.5768	1376.88	1559.1	No	1275.71	1465.1	1380.93	0.197462	0.0991519	3.94799	2.01623e-11	5.6111e-10	0.296614	0.0983105	FLT_LAR	Dhx33	DEAH (Asp-Glu-Ala-His) box polypeptide 33	216877
ENSMUSG00000029480	18	18	10	8	0.104354	9.16564	9.32782	9.29135	9.51252	623.375	746.1	No	568.218	676.197	628.206	0.248603	0.17467	2.01492	0.000621788	0.00557531	0.423272	0.0739331	FLT_LAR	Dhx37	DEAH (Asp-Glu-Ala-His) box polypeptide 37	208144
ENSMUSG00000090326	18	18	10	8	0.140575	5.64252	6.10115	6.68759	7.15482	45.625	88.7	No	45.5572	88.5297	69.4308	0.960907	0.373226	6.37667	2.22045e-16	9.41863e-15	1.33413	0.587682	FLT_LAR	Dthd1	death domain containing 1	100322896
ENSMUSG00000058325	18	18	10	8	0.0819766	12.3458	12.475	12.3304	12.5198	5516	6195.1	No	5128.28	5813.76	5509.1	0.180271	0.0895447	4.03332	7.39719e-12	2.12843e-10	0.269815	0.090726	FLT_LAR	Dock1	dedicator of cytokinesis 1	330662
ENSMUSG00000039716	18	18	10	8	0.0845126	6.97119	7.11407	7.55129	7.7143	126.875	152.9	No	122.463	143.643	134.23	0.238533	0.131738	3.25816	3.14231e-08	6.12144e-07	0.370271	0.106795	FLT_LAR	Dock3	dedicator of cyto-kinesis 3	208869
ENSMUSG00000044447	18	18	10	8	0.0755888	12.1682	12.2848	12.1578	12.3291	4734.62	5344.6	No	4570.28	5108.04	4869.03	0.160589	0.118388	1.83136	0.00186972	0.0147133	0.278977	0.0422008	FLT_LAR	Dock5	dedicator of cytokinesis 5	68813
ENSMUSG00000044748	18	16	10	6	0.222222	1.82145	1.94463	5.51621	5.69875	2.625	5.1	No	2.40961	5.67825	4.22552	1.19514	0.725563	2.64982	6.79004e-06	9.32e-05	1.9207	0.469573	FLT_LAR	Defb1	defensin beta 1	13214
ENSMUSG00000044249	18	6	6	0	0.333333	-0.996399	-0.954178	5.20528	5.37413	0	0.9	SZ	0	0.929964	0.516647	2.27168	1.55602	3.09712	1.44204e-07	2.58164e-06	3.82771	0.715663	FLT_LAR	Defb29	defensin beta 29	75400
ENSMUSG00000079114	18	10	5	5	0.340909	1.08498	0.95467	5.53281	5.36307	4	1.2	No	4.06654	1.00216	2.36411	-1.98249	1.15701	2.97396	4.40297e-07	7.3754e-06	-0.825481	-3.1395	GC_LAR	Defa42	defensin, alpha, 42	665927
ENSMUSG00000047517	18	18	10	8	0.127129	17.502	17.9498	17.3766	18.0327	195392	301599	No	174675	289346	238381	0.728116	0.232575	9.52384	2.22045e-16	9.41863e-15	0.960691	0.495541	FLT_LAR	Dmbt1	deleted in malignant brain tumors 1	12945
ENSMUSG00000022303	18	15	8	7	0.178571	0.654493	0.595214	5.53033	5.41864	2.125	1.1	No	2.4226	1.07058	1.67148	-1.03253	0.763982	1.9642	0.000850603	0.00738771	-0.268552	-1.79652	GC_LAR	Dcstamp	dendrocyte expressed seven transmembrane protein	75766
ENSMUSG00000037172	18	18	10	8	0.110937	12.622	12.3956	12.6901	12.3604	7388.12	5818.7	No	6815.46	5455.11	6059.71	-0.321204	0.219683	2.1511	0.000258993	0.00253962	-0.101522	-0.540887	GC_LAR	Dennd11	DENN domain containing 11	243780
ENSMUSG00000031024	18	18	10	8	0.0784862	11.4457	11.6346	11.4319	11.7058	2885.62	3454.3	No	2714.65	3279.67	3028.55	0.271409	0.0924715	8.5483	2.22045e-16	9.41863e-15	0.36388	0.178937	FLT_LAR	Denn2b	DENN domain containing 2B	76954
ENSMUSG00000007379	18	18	10	8	0.0937805	7.3974	7.25087	7.92598	7.75067	185.75	158.5	No	176.677	148.415	160.976	-0.244368	0.111837	4.79079	4.44089e-16	1.85973e-14	-0.132531	-0.356204	GC_LAR	Dennd2c	DENN/MADD domain containing 2C	329727
ENSMUSG00000060038	18	18	10	8	0.097305	9.14731	9.06042	9.34138	9.22375	617.125	563.8	No	582.943	527.595	552.194	-0.139614	0.0949092	2.16976	0.000228805	0.00226557	-0.0447049	-0.234523	GC_LAR	Dhps	deoxyhypusine synthase	330817
ENSMUSG00000025014	18	11	5	6	0.5	1.3446	1.03642	5.66407	5.32995	4.375	0.7	No	10.1626	0.574917	4.8361	-3.94207	1.18189	10.6332	2.22045e-16	9.41863e-15	-2.76018	-5.12396	GC_LAR	Dntt	deoxynucleotidyltransferase, terminal	21673
ENSMUSG00000025279	18	18	10	8	0.137001	8.70741	8.38434	9.01459	8.59439	505	337.6	No	479.073	320.078	390.742	-0.582829	0.213696	7.4991	2.22045e-16	9.41863e-15	-0.369133	-0.796525	GC_LAR	Dnase1l3	deoxyribonuclease 1-like 3	13421
ENSMUSG00000003812	18	18	10	8	0.0980483	9.22392	9.0905	9.42125	9.24101	644.875	565.2	No	623.073	534.753	574.006	-0.212308	0.104304	4.15856	1.6358e-12	5.01983e-11	-0.108004	-0.316613	GC_LAR	Dnase2a	deoxyribonuclease II alpha	13423
ENSMUSG00000028175	18	18	10	8	0.1219	7.58609	7.361	8.0891	7.81733	240.625	190.6	No	217.57	167.018	189.486	-0.378005	0.280064	1.83554	0.00182522	0.0143877	-0.0979413	-0.65807	GC_LAR	Depdc1a	DEP domain containing 1a	76131
ENSMUSG00000027173	18	18	10	8	0.100599	5.45149	5.33558	6.73624	6.62751	51.625	42.2	No	46.4827	39.8339	42.789	-0.258493	0.202209	1.66234	0.00475569	0.0329007	-0.056284	-0.460702	GC_LAR	Depdc7	DEP domain containing 7	211896
ENSMUSG00000009092	18	18	10	8	0.230364	8.07174	7.94317	8.43638	8.28132	321.875	330.7	No	285.396	339.853	239.36	-0.500358	0.220667	5.19205	2.22045e-16	9.41863e-15	-0.279691	-0.721026	GC_LAR	Derl3	Der1-like domain family, member 3	70377
ENSMUSG00000038702	18	18	10	8	0.0855248	9.33569	9.42039	9.46512	9.58186	695.125	740.6	No	639.663	696.205	671.075	0.1183	0.0878363	1.81276	0.00207973	0.0161731	0.206136	0.0304638	FLT_LAR	Dsel	dermatan sulfate epimerase-like	319901
ENSMUSG00000026208	18	18	10	8	0.102332	15.0905	14.8437	15.1488	14.791	38901.2	31056.2	No	38223.2	28941.6	33066.7	-0.401262	0.195796	4.22989	6.79012e-13	2.14632e-11	-0.205466	-0.597057	GC_LAR	Des	desmin	13346
ENSMUSG00000034774	18	14	6	8	0.22449	1.18581	1.09924	5.60843	5.41575	3.875	1.8	No	3.31719	1.53007	2.32435	-1.09201	0.804517	1.9078	0.0011953	0.00996363	-0.287496	-1.89653	GC_LAR	Dsg1c	desmoglein 1 gamma	211924
ENSMUSG00000056632	18	16	8	8	0.146667	2.09689	1.91242	5.79035	5.51922	6.125	2.6	No	7.10295	2.42355	4.50328	-1.41069	0.593825	5.75319	2.22045e-16	9.41863e-15	-0.816863	-2.00451	GC_LAR	Dsg3	desmoglein 3	13512
ENSMUSG00000054889	18	18	10	8	0.0813178	14.8534	14.982	14.8206	15.01	30963.9	35774.1	No	29270.3	33323.5	31522	0.187089	0.124937	2.23022	0.000152132	0.00157207	0.312026	0.0621525	FLT_LAR	Dsp	desmoplakin	109620
ENSMUSG00000037921	18	18	10	8	0.10215	9.51793	9.67977	9.61043	9.83221	765	936.7	No	719.248	872.804	804.557	0.279148	0.181344	2.35025	6.56789e-05	0.00073533	0.460492	0.0978035	FLT_LAR	Ddx60	DExD/H box helicase 60	234311
ENSMUSG00000022861	18	18	10	8	0.0804401	8.19695	8.05051	8.54448	8.35787	314.25	275.7	No	309.117	260.708	282.223	-0.23933	0.140239	2.92226	6.9467e-07	1.12218e-05	-0.0990908	-0.379569	GC_LAR	Dgkg	diacylglycerol kinase, gamma	110197
ENSMUSG00000026385	18	18	10	8	0.114792	12.6331	12.5196	12.6695	12.512	7270.12	6226.6	No	6818.39	5842.59	6276.28	-0.222642	0.187165	1.42161	0.0157652	0.0917276	-0.0354764	-0.409807	GC_LAR	Dbi	diazepam binding inhibitor	13167
ENSMUSG00000041415	18	18	10	8	0.079399	11.9101	12.0233	11.905	12.0714	4025	4447.6	No	3835.21	4249.28	4065.25	0.147688	0.118107	1.55709	0.00818353	0.0525693	0.265795	0.0295808	FLT_LAR	Dicer1	dicer 1, ribonuclease type III	192119
ENSMUSG00000028031	18	18	10	8	0.107967	6.94564	7.12318	7.52545	7.72841	130.375	164.3	No	120.865	148.342	136.13	0.298873	0.197347	2.28312	0.000105576	0.00112502	0.49622	0.101527	FLT_LAR	Dkk2	dickkopf WNT signaling pathway inhibitor 2	56811
ENSMUSG00000030792	18	18	10	8	0.13449	4.53623	4.29446	6.39823	6.1648	32.5	20.1	No	29.0218	18.1247	22.9679	-0.673335	0.377487	3.22037	4.52244e-08	8.63103e-07	-0.295848	-1.05082	GC_LAR	Dkkl1	dickkopf-like 1	50722
ENSMUSG00000004789	18	18	10	8	0.0842341	12.8075	12.8909	12.7994	12.9214	7743.38	8384.9	No	7088.51	7742.97	7452.1	0.127005	0.092308	1.88695	0.00135254	0.0110985	0.219313	0.034697	FLT_LAR	Dlst	dihydrolipoamide S-succinyltransferase (E2 component of 2-oxo-glutarate complex)	78920
ENSMUSG00000022304	18	15	8	7	0.326531	2.84631	2.57741	5.90965	5.62415	12.875	4.4	No	12.8546	4.22014	8.05769	-1.614	0.718076	5.04214	2.22045e-16	9.41863e-15	-0.895928	-2.33208	GC_LAR	Dpys	dihydropyrimidinase	64705
ENSMUSG00000042102	18	18	10	8	0.345178	3.23118	2.94397	6.01715	5.74803	17.125	6	No	16.7766	5.80305	10.6802	-1.54748	0.599206	6.68284	2.22045e-16	9.41863e-15	-0.948277	-2.14669	GC_LAR	Dmgdh	dimethylglycine dehydrogenase precursor	74129
ENSMUSG00000053687	18	18	10	8	0.0738046	5.73601	5.6302	6.88338	6.77213	56.75	50.8	No	56.5603	48.1516	51.8888	-0.192713	0.14646	1.85627	0.00161886	0.0129406	-0.0462533	-0.339173	GC_LAR	Dpep2	dipeptidase 2	319446
ENSMUSG00000036815	18	18	10	8	0.0946693	9.35404	9.47171	9.47225	9.63495	696.375	782.3	No	642.341	734.112	693.325	0.18852	0.12256	2.35864	6.1844e-05	0.000696827	0.31108	0.0659597	FLT_LAR	Dpp10	dipeptidylpeptidase 10	269109
ENSMUSG00000057147	18	18	10	8	0.0818194	8.49233	8.6355	8.71402	8.90178	362.875	430.8	No	351.19	410.419	384.095	0.232773	0.0993846	5.44793	2.22045e-16	9.41863e-15	0.332158	0.133389	FLT_LAR	Dph6	diphthamine biosynthesis 6	66632
ENSMUSG00000033166	18	18	10	8	0.0890206	9.94935	10.0558	10.0227	10.1721	1072.38	1183.2	No	977.068	1089.74	1039.66	0.155237	0.108873	2.02884	0.000569877	0.00516622	0.26411	0.0463643	FLT_LAR	Dis3	DIS3 homolog, exosome endoribonuclease and 3'-5' exoribonuclease	72662
ENSMUSG00000048826	18	18	10	8	0.090593	9.60242	9.70049	9.70488	9.83926	809.125	934.5	No	764.993	864.005	820	0.17582	0.137711	1.62274	0.00585338	0.0392799	0.313531	0.0381089	FLT_LAR	Dact2	dishevelled-binding antagonist of beta-catenin 2	240025
ENSMUSG00000030768	18	18	10	8	0.0828797	9.15005	9.22862	9.30025	9.40754	603.75	656	No	561.122	611.06	588.865	0.118238	0.0888801	1.7745	0.00258154	0.0195148	0.207118	0.0293577	FLT_LAR	Disp1	dispatched RND transporter family member 1	68897
ENSMUSG00000029270	18	18	10	8	0.0963258	8.97654	8.84977	9.20071	9.03026	553.75	485.1	No	521.589	455.225	484.721	-0.192854	0.110699	3.04483	2.32821e-07	4.03624e-06	-0.0821552	-0.303552	GC_LAR	Dipk1a	divergent protein kinase domain 1A	67266
ENSMUSG00000036186	18	18	10	8	0.0965256	8.65697	8.77951	8.85818	9.02046	431.25	498.3	No	397.059	453.002	428.138	0.187943	0.122587	2.34997	6.5811e-05	0.000736495	0.31053	0.0653556	FLT_LAR	Dipk1b	divergent protein kinase domain 1B	56279
ENSMUSG00000045414	18	18	10	8	0.0904814	10.4622	10.6329	10.4878	10.7312	1552.38	1797.4	No	1390.59	1651.05	1535.29	0.246048	0.143718	2.91284	7.54252e-07	1.20804e-05	0.389766	0.10233	FLT_LAR	Dipk2a	divergent protein kinase domain 2A	68861
ENSMUSG00000037544	18	18	10	8	0.138025	8.25853	8.0285	8.61719	8.32497	392.25	312.9	No	352.053	270.981	307.013	-0.375773	0.3061	1.5182	0.00992749	0.0618095	-0.0696731	-0.681874	GC_LAR	Dlgap5	DLG associated protein 5	218977
ENSMUSG00000031323	18	16	10	6	0.184615	1.63444	1.70939	5.51459	5.65987	2.375	4.6	No	2.51313	4.02618	3.35372	0.863195	0.60781	2.00851	0.000647151	0.00577187	1.471	0.255385	FLT_LAR	Dmrtc1a	DMRT-like family C1a	70887
ENSMUSG00000037416	18	18	10	8	0.0856461	12.6514	12.7412	12.6432	12.7748	6805.88	7292.6	No	6365.68	6959.22	6695.42	0.127959	0.0831762	2.35858	6.18689e-05	0.000696827	0.211135	0.044783	FLT_LAR	Dmxl1	Dmx-like 1	240283
ENSMUSG00000041268	18	18	10	8	0.0914506	9.53782	9.70431	9.62686	9.85672	773.5	908.8	No	730.261	882.707	814.953	0.271457	0.171936	2.47322	2.66625e-05	0.000325986	0.443393	0.0995205	FLT_LAR	Dmxl2	Dmx-like 2	235380
ENSMUSG00000000730	18	18	10	8	0.138728	3.16241	3.04632	5.95625	5.82942	11.875	7.8	No	10.5167	7.30734	8.73371	-0.573432	0.331325	3.05918	2.04305e-07	3.57248e-06	-0.242107	-0.904756	GC_LAR	Dnmt3l	DNA (cytosine-5-)-methyltransferase 3-like	54427
ENSMUSG00000025766	18	18	10	8	0.0867983	9.35912	9.47605	9.47729	9.63854	711.125	777.9	No	651.507	731.538	695.969	0.162547	0.127366	1.62487	0.00578893	0.0389368	0.289913	0.0351815	FLT_LAR	D3Ertd751e	DNA segment, Chr 3, ERATO Doi 751, expressed	73852
ENSMUSG00000078515	18	18	10	8	0.0826061	12.6389	12.7283	12.6306	12.7621	6789.38	7369	No	6318.77	6886.19	6634.01	0.123525	0.0808964	2.32429	7.90282e-05	0.000865624	0.204421	0.0426281	FLT_LAR	Ddi2	DNA-damage inducible protein 2	68817
ENSMUSG00000030708	18	18	10	8	0.159722	2.88785	2.75511	5.89555	5.74844	10.375	6.1	No	9.4735	5.82797	7.44821	-0.716355	0.466628	2.37625	5.44704e-05	0.000622833	-0.249728	-1.18298	GC_LAR	Dnajb13	DnaJ heat shock protein family (Hsp40) member B13	69387
ENSMUSG00000074212	18	18	10	8	0.0822039	11.0059	11.1546	11.0168	11.2305	2133.38	2469.5	No	2006.18	2334.67	2188.68	0.217702	0.0675643	10.3222	2.22045e-16	9.41863e-15	0.285266	0.150138	FLT_LAR	Dnajb14	DnaJ heat shock protein family (Hsp40) member B14	70604
ENSMUSG00000039768	18	18	10	8	0.0881382	11.4367	11.5624	11.4406	11.6209	2977.5	3402.1	No	2721.96	3124.07	2945.35	0.198231	0.118708	2.774	2.46427e-06	3.64293e-05	0.316939	0.0795238	FLT_LAR	Dnajc11	DnaJ heat shock protein family (Hsp40) member C11	230935
ENSMUSG00000040697	18	18	10	8	0.0845367	10.4045	10.5136	10.45	10.6058	1451	1595.4	No	1342.5	1492.8	1426	0.150621	0.105092	2.04844	0.000503557	0.00462558	0.255713	0.0455286	FLT_LAR	Dnajc16	DnaJ heat shock protein family (Hsp40) member C16	214063
ENSMUSG00000000826	18	18	10	8	0.0850607	12.9405	13.0703	12.9176	13.1089	8437.75	9310.1	No	7781.73	8793.66	8343.91	0.175928	0.106539	2.71341	4.06232e-06	5.7968e-05	0.282468	0.069389	FLT_LAR	Dnajc5	DnaJ heat shock protein family (Hsp40) member C5	13002
ENSMUSG00000027606	18	17	9	8	0.169231	1.78935	1.69081	5.69888	5.53683	4.5	2.9	No	4.97231	2.50701	3.6027	-0.84416	0.622699	1.86579	0.00153149	0.0123634	-0.221461	-1.46686	GC_LAR	Dnajc5b	DnaJ heat shock protein family (Hsp40) member C5 beta	66326
ENSMUSG00000099784	18	6	6	0	0.375	-1.25881	-1.22899	5.20528	5.36011	0	0.8	SZ	0	0.734246	0.407915	1.95697	1.56952	2.47291	2.67242e-05	0.000326537	3.5265	0.387451	FLT_LAR	Dalir	DNMT1 associated long intergenic non-coding RNA	104940697
ENSMUSG00000022102	18	18	10	8	0.100284	6.29657	6.11289	7.21538	7.01221	86.25	71.6	No	85.8157	67.0156	75.3712	-0.32237	0.176738	3.36676	1.07952e-08	2.22843e-07	-0.145631	-0.499108	GC_LAR	Dok2	docking protein 2	13449
ENSMUSG00000034973	18	18	10	8	0.073495	11.6715	11.8027	11.6669	11.8567	3337.12	3821.9	No	3230.17	3710.41	3496.97	0.199914	0.147495	1.82611	0.00192694	0.0151274	0.347409	0.0524188	FLT_LAR	Dop1a	DOP1 leucine zipper like protein A	320615
ENSMUSG00000020182	18	18	10	8	0.0915403	11.3406	11.5371	11.3235	11.6112	2931.5	3372.5	No	2590.61	3093.45	2869.96	0.254937	0.166782	2.31979	8.15887e-05	0.000891442	0.421719	0.0881553	FLT_LAR	Ddc	dopa decarboxylase	13195
ENSMUSG00000085008	18	10	4	6	0.1875	-0.120264	-0.18084	5.46598	5.30561	1.375	0.5	No	1.87532	0.449369	1.08312	-1.7323	1.08599	2.73295	3.4614e-06	5.00172e-05	-0.646311	-2.8183	GC_LAR	Dbhos	dopamine beta hydroxylase, opposite strand	329371
ENSMUSG00000022705	18	17	10	7	0.161538	2.5929	2.81072	5.63292	5.90413	3.625	10.1	No	4.14275	9.35626	7.03914	1.36405	0.473903	8.10318	2.22045e-16	9.41863e-15	1.83796	0.89015	FLT_LAR	Drd3	dopamine receptor D3	13490
ENSMUSG00000020848	18	18	10	8	0.11908	6.04304	6.22732	6.96062	7.16059	68.5	93	No	62.775	82.4483	73.7046	0.387573	0.2341	2.74134	3.23047e-06	4.69382e-05	0.621672	0.153473	FLT_LAR	Doc2b	double C2, beta	13447
ENSMUSG00000030584	18	18	10	8	0.115556	4.43737	4.62142	6.2265	6.40256	19.875	29.1	No	19.5512	28.0264	24.2596	0.542125	0.257079	4.40109	7.74936e-14	2.6502e-12	0.799204	0.285047	FLT_LAR	Dpf1	double PHD fingers 1	29861
ENSMUSG00000037259	18	18	10	8	0.0919272	6.67879	6.82691	7.35079	7.52229	108.125	127.8	No	98.8367	118.934	110.002	0.248695	0.140623	3.15445	8.45327e-08	1.56558e-06	0.389318	0.108072	FLT_LAR	Dzank1	double zinc ribbon and ankyrin repeat domains 1	241688
ENSMUSG00000033268	18	18	10	8	0.125	3.39799	3.51353	5.91	6.0321	10.125	14.3	No	9.12656	12.8252	11.1813	0.476635	0.292543	2.75144	2.97193e-06	4.34457e-05	0.769179	0.184092	FLT_LAR	Duox1	dual oxidase 1	99439
ENSMUSG00000068452	18	18	10	8	0.0982413	12.4402	12.1479	12.5245	12.1037	6228.38	4797.3	No	6193.89	4497.74	5251.59	-0.461328	0.224509	4.25406	5.02487e-13	1.6057e-11	-0.236819	-0.685836	GC_LAR	Duox2	dual oxidase 2	214593
ENSMUSG00000027225	18	18	10	8	0.10211	9.11732	8.70515	9.39442	8.84559	647.75	448.4	No	635.776	411.983	511.447	-0.622785	0.252119	6.14772	2.22045e-16	9.41863e-15	-0.370666	-0.874904	GC_LAR	Duoxa2	dual oxidase maturation factor 2	66811
ENSMUSG00000042046	18	18	10	8	0.0778028	10.3506	10.4176	10.4106	10.5062	1386.62	1470.3	No	1294.92	1383.39	1344.07	0.0916231	0.0687287	1.77728	0.00254163	0.0192463	0.160352	0.0228944	FLT_LAR	Dstyk	dual serine/threonine and tyrosine protein kinase	213452
ENSMUSG00000003518	18	18	10	8	0.0836919	11.9264	11.8256	11.9779	11.8327	4241.25	3857.4	No	3999.61	3592.06	3773.19	-0.154592	0.0978541	2.50427	2.10939e-05	0.000263413	-0.0567381	-0.252446	GC_LAR	Dusp3	dual specificity phosphatase 3 (vaccinia virus phosphatase VH1-related)	72349
ENSMUSG00000031530	18	18	10	8	0.0915152	7.49682	7.3043	8.0115	7.7806	204.375	166.5	No	195.097	154.339	172.454	-0.335238	0.175846	3.65484	5.40084e-10	1.30712e-08	-0.159392	-0.511084	GC_LAR	Dusp4	dual specificity phosphatase 4	319520
ENSMUSG00000034765	18	18	10	8	0.106698	8.32506	8.50175	8.56512	8.79466	334	407.6	No	310.442	384.008	351.312	0.304009	0.157238	3.7106	2.94412e-10	7.33909e-09	0.461247	0.146771	FLT_LAR	Dusp5	dual specificity phosphatase 5	240672
ENSMUSG00000042662	18	16	10	6	0.157895	1.5744	1.63693	5.52021	5.64838	2.125	4	No	2.74126	3.69409	3.27061	0.760289	0.607404	1.60996	0.00625358	0.0416	1.36769	0.152885	FLT_LAR	Dusp15	dual specificity phosphatase-like 15	252864
ENSMUSG00000022897	18	18	10	8	0.0794494	11.9219	12.0019	11.9272	12.0437	4162.38	4422.2	No	3841.18	4158.35	4017.39	0.11248	0.0726169	2.39425	4.77974e-05	0.000554978	0.185097	0.0398633	FLT_LAR	Dyrk1a	dual-specificity tyrosine-(Y)-phosphorylation regulated kinase 1a	13548
ENSMUSG00000016526	18	18	10	8	0.111671	5.96619	5.69394	7.03836	6.76688	81.625	53.8	No	70.6522	48.6718	58.4409	-0.562277	0.208153	7.48701	2.22045e-16	9.41863e-15	-0.354124	-0.77043	GC_LAR	Dyrk3	dual-specificity tyrosine-(Y)-phosphorylation regulated kinase 3	226419
ENSMUSG00000022789	18	18	10	8	0.0864941	12.0926	12.1735	12.0945	12.2124	4742.88	5043.3	No	4330.41	4694.9	4532.9	0.115717	0.089392	1.67132	0.00453405	0.0315703	0.205109	0.0263252	FLT_LAR	Dnm1l	dynamin 1-like	74006
ENSMUSG00000043020	18	18	10	8	0.128981	5.04886	4.93663	6.56033	6.4495	38.625	31.9	No	35.5989	29.3821	32.1451	-0.280947	0.188401	2.253	0.000130105	0.0013632	-0.0925466	-0.469348	GC_LAR	Dnai3	dynein axonemal intermediate chain 3	242253
ENSMUSG00000095677	18	18	10	8	0.104019	10.5306	10.3984	10.6314	10.4459	1664.88	1439.7	No	1552.6	1332.24	1430.18	-0.219884	0.139131	2.50865	2.04036e-05	0.000255399	-0.0807528	-0.359016	GC_LAR	Dynlt1f	dynein light chain Tctex-type 1F	100040531
ENSMUSG00000116780	18	7	5	2	0.354839	0.545446	0.6447	5.30029	5.46413	0.5	2.7	No	0.653209	2.65031	1.76271	2.48749	1.44089	2.34393	6.87176e-05	0.000765116	3.92838	1.0466	FLT_LAR	Dynlt2a3	dynein light chain Tctex-type 2A3	100041586
ENSMUSG00000073102	18	18	10	8	0.107093	5.25048	5.10552	6.65438	6.51405	45.375	35.6	No	41.3585	32.7629	36.5832	-0.355833	0.182618	3.87968	4.43292e-11	1.19816e-09	-0.173215	-0.538451	GC_LAR	Drc1	dynein regulatory complex subunit 1	381738
ENSMUSG00000055809	18	18	10	8	0.103825	5.60459	5.4932	6.81542	6.70346	55.25	47.3	No	53.0054	44.2155	48.1221	-0.268062	0.22545	1.42132	0.0157865	0.0917603	-0.0426127	-0.493512	GC_LAR	Dnaaf3	dynein, axonemal assembly factor 3	436022
ENSMUSG00000021879	18	18	10	8	0.109375	1.89533	1.81534	5.71437	5.5958	4.375	2.9	No	5.03696	2.94579	3.8752	-0.645662	0.501805	1.93061	0.00104272	0.00882891	-0.143856	-1.14747	GC_LAR	Dnah12	dynein, axonemal, heavy chain 12	110083
ENSMUSG00000052273	18	16	8	8	0.170732	1.40395	1.31914	5.62472	5.4927	2.875	1.8	No	4.67539	2.04368	3.21333	-1.01038	0.8025	1.79225	0.0023364	0.0179088	-0.207876	-1.81288	GC_LAR	Dnah3	dynein, axonemal, heavy chain 3	381917
ENSMUSG00000042707	18	13	6	7	0.178571	1.51609	1.39474	5.65276	5.43097	4.75	1.8	No	4.31131	1.87012	2.95509	-1.27871	0.799733	2.56676	1.30596e-05	0.000169943	-0.478977	-2.07844	GC_LAR	Dnali1	dynein, axonemal, light intermediate polypeptide 1	75563
ENSMUSG00000071454	18	18	10	8	0.10047	8.66708	8.84228	8.85426	9.08564	411.25	500.1	No	392.477	492.845	448.237	0.327964	0.174656	3.48838	3.13651e-09	6.91426e-08	0.502621	0.153308	FLT_LAR	Dtnb	dystrobrevin, beta	13528
ENSMUSG00000039952	18	18	10	8	0.0873709	12.8941	13.0357	12.8684	13.0739	8288.25	9515.5	No	7527.22	8769.19	8217.2	0.220115	0.155928	1.97998	0.000772139	0.00678291	0.376043	0.0641876	FLT_LAR	Dag1	dystroglycan 1	13138
ENSMUSG00000036499	18	18	10	8	0.0860529	12.2627	12.3859	12.2504	12.4307	5247	5902	No	4829.73	5475.14	5188.29	0.180332	0.0884139	4.14048	2.0397e-12	6.14457e-11	0.268746	0.0919181	FLT_LAR	Eea1	early endosome antigen 1	216238
ENSMUSG00000044072	18	18	10	8	0.0860124	9.04529	9.17177	9.19529	9.36648	552.25	622	No	521.618	591.493	560.438	0.178507	0.114032	2.43974	3.42217e-05	0.000408532	0.292539	0.0644752	FLT_LAR	Eml6	echinoderm microtubule associated protein like 6	237711
ENSMUSG00000078771	18	18	10	8	0.129521	7.93298	7.67379	8.35996	8.04033	290.75	209.8	No	263.63	196.644	226.415	-0.428297	0.14544	8.74544	2.22045e-16	9.41863e-15	-0.282857	-0.573737	GC_LAR	Evi2a	ecotropic viral integration site 2a	14017
ENSMUSG00000026051	18	18	10	8	0.0957447	3.23223	3.3292	5.87509	5.98352	8.75	11.8	No	8.53541	11.1952	10.0131	0.430395	0.307985	1.96722	0.000835052	0.00726946	0.73838	0.12241	FLT_LAR	Ecrg4	ECRG4 augurin precursor	78896
ENSMUSG00000034457	18	18	10	8	0.0843402	7.83092	7.66885	8.25523	8.05588	260.25	213.9	No	241.139	198.178	217.272	-0.288304	0.132583	4.76685	6.66134e-16	2.77194e-14	-0.155722	-0.420887	GC_LAR	Eda2r	ectodysplasin A2 receptor	245527
ENSMUSG00000059327	18	18	10	8	0.125579	6.44548	6.6512	7.19057	7.42458	91.125	121.4	No	82.5652	114.438	100.273	0.459862	0.257567	3.15698	8.25451e-08	1.53309e-06	0.717429	0.202295	FLT_LAR	Eda	ectodysplasin-A	13607
ENSMUSG00000022012	18	18	10	8	0.0793758	6.2257	6.32602	7.09281	7.19795	75	87.4	No	73.202	82.6622	78.4577	0.201305	0.12298	2.70707	4.27795e-06	6.08468e-05	0.324285	0.078325	FLT_LAR	Enox1	ecto-NOX disulfide-thiol exchanger 1	239188
ENSMUSG00000033068	18	18	10	8	0.0854379	10.7909	10.9329	10.8105	11.0147	1894.12	2175.1	No	1733.86	2008.11	1886.22	0.210342	0.0931461	5.07536	2.22045e-16	9.41863e-15	0.303488	0.117196	FLT_LAR	Entpd6	ectonucleoside triphosphate diphosphohydrolase 6	12497
ENSMUSG00000038173	18	18	10	8	0.093423	7.13392	7.02771	7.72663	7.60319	156.75	142.2	No	146.293	129.305	136.855	-0.173596	0.147257	1.40184	0.017278	0.0988244	-0.0263395	-0.320854	GC_LAR	Enpp6	ectonucleotide pyrophosphatase/phosphodiesterase 6	320981
ENSMUSG00000046697	18	17	10	7	0.340249	3.08397	3.38573	5.72861	6.0243	6	19.3	No	6.40576	16.8738	12.2213	1.45442	0.725891	3.75183	1.86931e-10	4.77291e-09	2.18031	0.728529	FLT_LAR	Enpp7	ectonucleotide pyrophosphatase/phosphodiesterase 7	238011
ENSMUSG00000095105	18	18	10	8	0.264476	5.64664	6.0548	6.68201	7.13154	46	91	No	43.5511	95.5083	52.9958	0.457615	0.228012	3.98557	1.29974e-11	3.6519e-10	0.685626	0.229603	FLT_LAR	Edaradd	EDAR (ectodysplasin-A receptor)-associated death domain	171211
ENSMUSG00000026255	18	18	10	8	0.0974114	6.1319	6.2527	7.02851	7.15954	75.125	86.7	No	68.0401	79.9172	74.6385	0.217146	0.16504	1.76175	0.00277188	0.0207527	0.382186	0.0521058	FLT_LAR	Efhd1	EF hand domain containing 1	98363
ENSMUSG00000023931	18	18	10	8	0.0833333	5.79378	5.65139	6.92531	6.77506	59.125	52.3	No	60.391	48.8606	53.9852	-0.250635	0.180229	2.02347	0.000589418	0.00531588	-0.0704053	-0.430864	GC_LAR	Efhb	EF hand domain family, member B	211482
ENSMUSG00000034488	18	18	10	8	0.108503	9.52748	9.785	9.58874	9.94972	861.125	1023.5	No	745.459	932.173	849.189	0.319416	0.208289	2.33213	7.47501e-05	0.000823911	0.527705	0.111126	FLT_LAR	Edil3	EGF-like repeats and discoidin I-like domains 3	13612
ENSMUSG00000042961	18	18	10	8	0.0969954	8.12348	8.28934	8.39968	8.61519	312.5	362.4	No	278.118	328.818	306.285	0.233382	0.187658	1.54643	0.00863198	0.0550466	0.42104	0.0457247	FLT_LAR	Egflam	EGF-like, fibronectin type III and laminin G domains	268780
ENSMUSG00000031987	18	18	10	8	0.0836788	11.209	11.307	11.2262	11.3679	2506.88	2771.1	No	2334.6	2589.49	2476.21	0.148815	0.0950264	2.44349	3.32832e-05	0.000398595	0.243841	0.0537882	FLT_LAR	Egln1	egl-9 family hypoxia-inducible factor 1	112405
ENSMUSG00000035105	18	18	10	8	0.0834904	11.4143	11.2941	11.4792	11.3087	2947.25	2630.8	No	2880.8	2497.72	2667.98	-0.205138	0.163196	1.5865	0.00705283	0.0461743	-0.041942	-0.368334	GC_LAR	Egln3	egl-9 family hypoxia-inducible factor 3	112407
ENSMUSG00000024937	18	18	10	8	0.0761801	11.7896	11.8924	11.7905	11.9405	3636.25	4090.2	No	3514.27	3880.98	3718	0.143279	0.10906	1.71891	0.0035092	0.0254308	0.252339	0.0342191	FLT_LAR	Ehbp1l1	EH domain binding protein 1-like 1	114601
ENSMUSG00000024772	18	18	10	8	0.086059	11.2278	11.3332	11.2422	11.3931	2620	2893.6	No	2374.65	2663.18	2534.94	0.164844	0.133686	1.51413	0.0101276	0.0628319	0.29853	0.0311586	FLT_LAR	Ehd1	EH-domain containing 1	13660
ENSMUSG00000020549	18	18	10	8	0.0929983	9.95445	10.0889	10.0188	10.2076	1109	1253.7	No	985.016	1137.32	1069.63	0.205271	0.163954	1.56077	0.00803366	0.0517329	0.369226	0.0413167	FLT_LAR	Elac2	elaC ribonuclease Z 2	68626
ENSMUSG00000029675	18	18	10	8	0.0833649	9.33669	9.50672	9.4433	9.67654	671.25	784.9	No	642.324	766.247	711.17	0.252955	0.181388	1.9303	0.00104465	0.00884237	0.434343	0.071567	FLT_LAR	Eln	elastin	13717
ENSMUSG00000009406	18	18	10	8	0.0789813	8.57874	8.48303	8.84879	8.72332	409.5	371.3	No	392.113	354.231	371.067	-0.146843	0.0964032	2.32952	7.615e-05	0.000837586	-0.0504398	-0.243246	GC_LAR	Elk1	ELK1, member of ETS oncogene family	13712
ENSMUSG00000021890	18	18	10	8	0.0894527	10.8412	10.9237	10.8747	10.9937	1995.25	2124.2	No	1818.58	1975.07	1905.52	0.11711	0.0916471	1.63023	0.00562956	0.0379523	0.208757	0.0254625	FLT_LAR	Eaf1	ELL associated factor 1	74427
ENSMUSG00000022838	18	18	10	8	0.100291	6.94873	6.59276	7.66945	7.27101	139.875	94.5	No	142.164	92.51	114.578	-0.612319	0.235382	6.79116	2.22045e-16	9.41863e-15	-0.376937	-0.847701	GC_LAR	Eaf2	ELL associated factor 2	106389
ENSMUSG00000035151	18	18	10	8	0.0844694	10.6366	10.7179	10.6791	10.7957	1715.38	1804	No	1578.64	1708.21	1650.62	0.110531	0.0820689	1.81095	0.00210131	0.016316	0.1926	0.0284624	FLT_LAR	Elmod2	ELMO/CED-12 domain containing 2	244548
ENSMUSG00000021364	18	18	10	8	0.186398	4.42012	4.22524	6.35176	6.15379	26.875	18.2	No	27.2587	17.5445	21.8619	-0.626344	0.371958	2.84411	1.36444e-06	2.09844e-05	-0.254386	-0.998301	GC_LAR	Elovl2	elongation of very long chain fatty acids (FEN1/Elo2, SUR4/Elo3, yeast)-like 2	54326
ENSMUSG00000032262	18	18	10	8	0.115976	5.27728	5.39013	6.58652	6.7041	42	50.9	No	37.0557	45.0865	41.5172	0.265241	0.223868	1.46831	0.0126449	0.0760457	0.48911	0.0413731	FLT_LAR	Elovl4	elongation of very long chain fatty acids (FEN1/Elo2, SUR4/Elo3, yeast)-like 4	83603
ENSMUSG00000028431	18	18	10	8	0.0872896	10.2642	10.3992	10.3096	10.5018	1341.62	1498.6	No	1216.99	1388.06	1312.03	0.186832	0.122841	2.30506	9.05266e-05	0.000977724	0.309673	0.0639914	FLT_LAR	Elp1	elongator complex protein 1	230233
ENSMUSG00000021696	18	18	10	8	0.0902457	11.9288	12.0691	11.9149	12.1216	4363.88	4758.6	No	3892.12	4410.28	4179.99	0.179453	0.135906	1.73529	0.00320841	0.0235364	0.315359	0.0435476	FLT_LAR	Elovl7	ELOVL family member 7, elongation of long chain fatty acids (yeast)	74559
ENSMUSG00000029286	18	11	3	8	0.181818	0.981987	0.842229	5.61611	5.32799	3	0.9	No	4.24531	0.899813	2.3867	-2.10904	1.01417	4.35302	1.43885e-13	4.81429e-12	-1.09488	-3.12321	GC_LAR	Enam	enamelin	13801
ENSMUSG00000021262	18	18	10	8	0.100391	8.65801	8.58075	8.91032	8.80964	453	405.6	No	415.204	378.919	395.046	-0.139184	0.103143	1.83593	0.00182117	0.0143656	-0.0360413	-0.242327	GC_LAR	Evl	Ena-vasodilator stimulated phosphoprotein	14026
ENSMUSG00000037482	18	10	4	6	0.263158	0.179391	0.12465	5.47605	5.33005	1.625	0.6	No	1.86877	0.735401	1.23912	-1.45768	1.09999	1.71273	0.0036292	0.0261419	-0.357689	-2.55768	GC_LAR	Erv3	endogenous retroviral sequence 3	71995
ENSMUSG00000022468	18	18	10	8	0.115922	5.34871	5.08458	6.74474	6.47568	48.375	32.9	No	46.9721	31.0819	38.1442	-0.565361	0.194949	8.47327	2.22045e-16	9.41863e-15	-0.370412	-0.76031	GC_LAR	Endou	endonuclease, polyU-specific	19011
ENSMUSG00000036611	18	18	10	8	0.122877	8.58682	8.45807	8.86361	8.69558	439	373.1	No	404.263	347.926	372.965	-0.2168	0.151052	2.06956	0.000440233	0.00410411	-0.0657485	-0.367852	GC_LAR	Eepd1	endonuclease/exonuclease/phosphatase family domain containing 1	67484
ENSMUSG00000020715	18	18	10	8	0.0713765	11.4803	11.5924	11.4865	11.6484	2912.88	3294.8	No	2818.7	3163.77	3010.41	0.167028	0.104949	2.52011	1.86995e-05	0.000236431	0.271977	0.0620793	FLT_LAR	Ern1	endoplasmic reticulum (ER) to nucleus signalling 1	78943
ENSMUSG00000020311	18	18	10	8	0.0818736	10.1607	10.0661	10.2724	10.1406	1195	1110.6	No	1190.82	1063.29	1119.97	-0.159246	0.130523	1.49275	0.0112407	0.0686679	-0.0287226	-0.28977	GC_LAR	Erlec1	endoplasmic reticulum lectin 1	66753
ENSMUSG00000046324	18	18	10	8	0.0882371	11.8565	12.074	11.826	12.1409	3949.25	4856.5	No	3586.6	4522.58	4106.59	0.333904	0.128238	6.71059	2.22045e-16	9.41863e-15	0.462143	0.205666	FLT_LAR	Ermp1	endoplasmic reticulum metallopeptidase 1	226090
ENSMUSG00000057069	18	18	10	8	0.41213	9.80949	9.98165	9.87556	10.0926	944.25	1790.4	No	870.404	1936.82	812.508	-0.191394	0.0679196	7.97863	2.22045e-16	9.41863e-15	-0.123474	-0.259313	GC_LAR	Ero1b	endoplasmic reticulum oxidoreductase 1 beta	67475
ENSMUSG00000057530	18	18	10	8	0.0832934	12.5928	12.7141	12.5762	12.7513	6699.62	7588.5	No	6101.07	6999.2	6600.03	0.1978	0.148887	1.75513	0.00287572	0.0214002	0.346687	0.0489137	FLT_LAR	Ece1	endothelin converting enzyme 1	230857
ENSMUSG00000031616	18	18	10	8	0.0792352	9.10167	9.22414	9.2455	9.41228	589.625	652.8	No	544.891	615.049	583.868	0.170121	0.13025	1.70148	0.0038571	0.0275572	0.300371	0.0398713	FLT_LAR	Ednra	endothelin receptor type A	13617
ENSMUSG00000022122	18	18	10	8	0.102802	9.69425	9.85903	9.76888	9.99972	940	1061.2	No	824.466	967.656	904.016	0.22778	0.164305	1.91323	0.00115722	0.00967375	0.392085	0.0634756	FLT_LAR	Ednrb	endothelin receptor type B	13618
ENSMUSG00000028445	18	18	10	8	0.0855466	7.23968	7.43639	7.72131	7.95558	163.125	193.3	No	145.96	181.047	165.453	0.294426	0.134385	4.80701	2.22045e-16	9.41863e-15	0.428812	0.160041	FLT_LAR	Enho	energy homeostasis associated	69638
ENSMUSG00000036270	18	18	10	8	0.085436	10.9385	11.0396	10.9636	11.1095	2070.75	2306.6	No	1936.91	2142.88	2051.34	0.144494	0.0824591	3.06174	1.99586e-07	3.49229e-06	0.226953	0.062035	FLT_LAR	Edc4	enhancer of mRNA decapping 4	234699
ENSMUSG00000069495	18	18	10	8	0.0845814	10.8846	10.9699	10.9153	11.0387	2084.62	2198.4	No	1878.85	2038.11	1967.33	0.114053	0.0957083	1.41956	0.0159164	0.0923823	0.209761	0.0183446	FLT_LAR	Epc2	enhancer of polycomb homolog 2	227867
ENSMUSG00000072596	18	18	10	8	0.125741	5.47859	5.25161	6.78653	6.56238	56.5	39.1	No	50.3213	36.2404	42.4985	-0.486796	0.239824	4.17344	1.36335e-12	4.20338e-11	-0.246972	-0.72662	GC_LAR	Ear2	eosinophil-associated, ribonuclease A family, member 2	13587
ENSMUSG00000046058	18	18	10	8	0.108765	6.21296	6.3232	7.07429	7.19826	80	92.3	No	72.2221	83.6305	78.5601	0.190776	0.158159	1.53249	0.00925133	0.0583864	0.348935	0.0326169	FLT_LAR	Eid2	EP300 interacting inhibitor of differentiation 2	386655
ENSMUSG00000029859	18	18	10	8	0.0884292	10.1232	10.0244	10.2394	10.1001	1226.38	1112.1	No	1139.77	1033.86	1080.93	-0.141978	0.0941396	2.28377	0.000105095	0.00112125	-0.0478382	-0.236117	GC_LAR	Epha1	Eph receptor A1	13835
ENSMUSG00000031217	18	18	10	8	0.0895498	11.6676	11.7818	11.6689	11.8325	3499.62	3995.4	No	3199.79	3643.76	3446.44	0.186926	0.12699	2.1561	0.000250559	0.00246334	0.313916	0.0599366	FLT_LAR	Efnb1	ephrin B1	13641
ENSMUSG00000001300	18	18	10	8	0.0760479	12.0617	12.2234	12.0425	12.2763	4396.62	5166.7	No	4178.77	4979.64	4623.69	0.252897	0.130231	3.742	2.08413e-10	5.28549e-09	0.383127	0.122666	FLT_LAR	Efnb2	ephrin B2	13642
ENSMUSG00000003934	18	18	10	8	0.0946565	5.00393	5.15142	6.45942	6.60686	31.625	40.2	No	30.3239	38.3376	34.776	0.324704	0.209911	2.37737	5.40322e-05	0.000618361	0.534616	0.114793	FLT_LAR	Efnb3	ephrin B3	13643
ENSMUSG00000028017	18	18	10	8	0.180616	8.4503	8.75741	8.63403	9.03658	383.25	547.7	No	337.3	536.604	448.024	0.666813	0.327569	4.04524	6.4202e-12	1.85748e-10	0.994382	0.339244	FLT_LAR	Egf	epidermal growth factor	13645
ENSMUSG00000020122	18	18	10	8	0.081389	11.4382	11.6766	11.4104	11.7558	2958.5	3680.7	No	2692.54	3430.32	3102.42	0.348311	0.133217	6.76426	2.22045e-16	9.41863e-15	0.481528	0.215093	FLT_LAR	Egfr	epidermal growth factor receptor	13649
ENSMUSG00000015766	18	18	10	8	0.078416	13.0562	13.1919	13.0307	13.23	8975	10183.8	No	8398.99	9622.66	9078.8	0.19613	0.115345	2.87479	1.04887e-06	1.64878e-05	0.311475	0.0807845	FLT_LAR	Eps8	epidermal growth factor receptor pathway substrate 8	13860
ENSMUSG00000035020	18	17	10	7	0.157895	1.4695	1.54766	5.49826	5.63738	2.25	3.9	No	1.88973	3.77972	2.93972	0.860968	0.608922	2.03436	0.000550417	0.00501147	1.46989	0.252047	FLT_LAR	Epgn	epithelial mitogen	71920
ENSMUSG00000084128	18	18	10	8	0.0788399	11.1692	11.2255	11.1996	11.2803	2425.75	2590.1	No	2280.78	2420.76	2358.55	0.0851604	0.0583663	2.12588	0.000305761	0.00294334	0.143527	0.026794	FLT_LAR	Esrp2	epithelial splicing regulatory protein 2	77411
ENSMUSG00000033805	18	18	10	8	0.125316	6.66953	6.4849	7.4385	7.23373	125.375	97.6	No	111.458	87.3691	98.0755	-0.353769	0.206847	2.9645	4.78885e-07	7.96596e-06	-0.146922	-0.560616	GC_LAR	Ephx4	epoxide hydrolase 4	384214
ENSMUSG00000003206	18	18	10	8	0.110937	5.0835	4.92526	6.58878	6.43467	41	31.2	No	37.2283	29.1138	32.7202	-0.365833	0.217067	2.86828	1.10932e-06	1.73655e-05	-0.148766	-0.5829	GC_LAR	Ebi3	Epstein-Barr virus induced gene 3	50498
ENSMUSG00000078517	18	18	10	8	0.0924458	11.3891	11.5921	11.3714	11.6657	2907.12	3501.5	No	2635.09	3224.46	2962.52	0.290317	0.147491	3.84192	6.81324e-11	1.80626e-09	0.437808	0.142827	FLT_LAR	Emc1	ER membrane protein complex subunit 1	230866
ENSMUSG00000031819	18	18	10	8	0.0803019	10.0822	10.16	10.1554	10.2648	1124.62	1233.5	No	1069.94	1159.66	1119.79	0.121484	0.0572165	4.49525	2.26485e-14	8.20433e-13	0.1787	0.0642673	FLT_LAR	Emc8	ER membrane protein complex subunit 8	18117
ENSMUSG00000062209	18	17	9	8	0.27044	2.81915	2.94727	5.77117	5.85758	6	11.1	No	5.99852	11.0009	8.77762	0.905553	0.605544	2.16377	0.000238115	0.00235332	1.5111	0.300009	FLT_LAR	Erbb4	erb-b2 receptor tyrosine kinase 4	13869
ENSMUSG00000027624	18	18	10	8	0.0865852	11.8811	12.0226	11.8709	12.0759	3917	4546.7	No	3692.48	4280.81	4019.33	0.212853	0.0984843	4.6429	3.10862e-15	1.22203e-13	0.311338	0.114369	FLT_LAR	Epb41l1	erythrocyte membrane protein band 4.1 like 1	13821
ENSMUSG00000024376	18	18	10	8	0.0913183	8.575	8.70504	8.78638	8.95813	403.625	454.6	No	372.481	430.994	404.988	0.202115	0.109932	3.37017	1.04329e-08	2.16043e-07	0.312047	0.0921832	FLT_LAR	Epb41l4a	erythrocyte membrane protein band 4.1 like 4a	13824
ENSMUSG00000028434	18	18	10	8	0.0814961	13.23	13.3591	13.2035	13.395	10537.5	11496.1	No	9565.79	10757.2	10227.7	0.16902	0.12421	1.84295	0.00174885	0.0138617	0.29323	0.0448101	FLT_LAR	Epb41l4b	erythrocyte membrane protein band 4.1 like 4b	54357
ENSMUSG00000006235	18	18	10	8	0.114286	4.17762	4.28312	6.14939	6.25443	18.25	23.9	No	16.7525	21.4815	19.3797	0.349874	0.281349	1.58897	0.0069646	0.0456911	0.631224	0.0685249	FLT_LAR	Epor	erythropoietin receptor	13857
ENSMUSG00000019768	18	18	10	8	0.0897593	8.61863	8.74955	8.82176	8.99664	430.25	470.2	No	390.152	442.957	419.488	0.17278	0.133552	1.67507	0.0044445	0.0310289	0.306332	0.0392288	FLT_LAR	Esr1	estrogen receptor 1 (alpha)	13982
ENSMUSG00000021255	18	18	10	8	0.165414	2.65551	2.79447	5.71827	5.87473	4.875	9.4	No	4.96173	8.43766	6.8928	0.854382	0.399175	4.58251	7.10543e-15	2.70037e-13	1.25356	0.455207	FLT_LAR	Esrrb	estrogen related receptor, beta	26380
ENSMUSG00000030275	18	18	10	8	0.0852547	12.5283	12.6104	12.5241	12.6438	6186.75	6652.3	No	5832.62	6353.25	6121.86	0.123133	0.0728871	2.84403	1.36536e-06	2.09863e-05	0.19602	0.0502459	FLT_LAR	Etnk1	ethanolamine kinase 1	75320
ENSMUSG00000070644	18	18	10	8	0.146586	4.78904	4.59568	6.48833	6.29437	32.375	23.9	No	33.5278	22.9781	27.6669	-0.519016	0.317326	2.68874	4.96486e-06	6.9824e-05	-0.201691	-0.836342	GC_LAR	Etnk2	ethanolamine kinase 2	214253
ENSMUSG00000035530	18	18	10	8	0.0708899	12.1484	11.9892	12.2045	11.9779	4582.88	4117.6	No	5033.72	4082.7	4505.37	-0.301332	0.230487	1.71866	0.00351389	0.0254514	-0.0708445	-0.531819	GC_LAR	Eif1	eukaryotic translation initiation factor 1	20918
ENSMUSG00000031668	18	18	10	8	0.0811698	11.0803	11.2067	11.0939	11.2738	2345.38	2630.3	No	2131.77	2472.29	2320.95	0.212859	0.152113	1.94681	0.000945534	0.00809196	0.364972	0.0607464	FLT_LAR	Eif2ak3	eukaryotic translation initiation factor 2 alpha kinase 3	13666
ENSMUSG00000024079	18	18	10	8	0.0900138	11.0682	11.1914	11.0813	11.2598	2403	2636.9	No	2137.01	2409.14	2288.19	0.171292	0.138739	1.51851	0.00991249	0.0617306	0.310031	0.032553	FLT_LAR	Eif2ak2	eukaryotic translation initiation factor 2-alpha kinase 2	19106
ENSMUSG00000093661	18	18	10	8	0.0798146	9.01955	8.94583	9.22435	9.12559	563.75	520	No	527.152	490.783	506.947	-0.107102	0.0855282	1.57205	0.00758956	0.049247	-0.0215737	-0.19263	GC_LAR	Eif4e3	eukaryotic translation initiation factor 4E member 3	66892
ENSMUSG00000039903	18	18	10	8	0.0735435	5.70264	5.84546	6.7952	6.94125	52.375	62.8	No	50.9222	61.7262	56.9244	0.271876	0.220624	1.50837	0.0104175	0.0643499	0.4925	0.0512523	FLT_LAR	Eva1c	eva-1 homolog C (C. elegans)	70967
ENSMUSG00000086126	18	18	10	8	0.149533	3.46713	3.27	6.06422	5.84834	15	9.4	No	14.8844	8.0257	11.074	-0.803563	0.420115	3.69834	3.36701e-10	8.31446e-09	-0.383447	-1.22368	GC_LAR	Evx1os	even skipped homeotic gene 1, opposite strand	70593
ENSMUSG00000021694	18	18	10	8	0.0769042	8.67466	8.78628	8.87712	9.02452	424.25	474.6	No	400.996	453.364	430.089	0.177813	0.100526	3.11368	1.23696e-07	2.23888e-06	0.278339	0.0772865	FLT_LAR	Ercc8	excision repaiross-complementing rodent repair deficiency, complementation group 8	71991
ENSMUSG00000011263	18	18	10	8	0.0924587	7.53003	7.67518	7.94639	8.12388	192.375	233.3	No	180.322	213.698	198.864	0.242059	0.147134	2.70581	4.32207e-06	6.13747e-05	0.389193	0.0949248	FLT_LAR	Exoc3l2	exocyst complex component 3-like 2	74463
ENSMUSG00000021280	18	18	10	8	0.0808314	6.54941	6.4476	7.34106	7.22807	102.875	90.9	No	98.3857	85.4819	91.2169	-0.199754	0.140419	2.02821	0.000572112	0.0051829	-0.0593343	-0.340173	GC_LAR	Exoc3l4	exocyst complex component 3-like 4	74190
ENSMUSG00000029763	18	18	10	8	0.0811151	11.7132	11.755	11.7331	11.7939	3599.25	3713.7	No	3338.88	3478.49	3416.44	0.0567257	0.0476192	1.42117	0.0157971	0.0917714	0.104345	0.00910656	FLT_LAR	Exoc4	exocyst complex component 4	20336
ENSMUSG00000033769	18	18	10	8	0.0728668	11.277	11.4041	11.2842	11.4677	2526.88	2905.3	No	2448.32	2785.59	2635.69	0.186645	0.115385	2.6017	9.94112e-06	0.000132443	0.302029	0.0712601	FLT_LAR	Exoc6b	exocyst complex component 6B	75914
ENSMUSG00000048647	18	18	10	8	0.0898329	6.32509	6.12499	7.23145	7.01772	89.75	71.8	No	86.5438	67.0664	75.723	-0.360822	0.157398	5.27318	2.22045e-16	9.41863e-15	-0.203424	-0.518221	GC_LAR	Exd1	exonuclease 3'-5' domain containing 1	241624
ENSMUSG00000028629	18	18	10	8	0.0924349	8.76903	8.67664	9.011	8.88792	478.5	439.4	No	448.883	404.803	424.394	-0.142871	0.103143	1.9238	0.00108623	0.00916486	-0.0397278	-0.246015	GC_LAR	Exo5	exonuclease 5	73172
ENSMUSG00000030929	18	18	10	8	0.0836008	8.52104	8.44552	8.79462	8.69583	397.125	367.7	No	375.275	345.17	358.55	-0.116667	0.0849356	1.89349	0.00130126	0.0107144	-0.0317314	-0.201603	GC_LAR	Eri2	exoribonuclease 2	71151
ENSMUSG00000061731	18	18	10	8	0.0867066	11.0109	11.093	11.0385	11.1573	2229	2374.5	No	2041.96	2222.01	2141.99	0.119459	0.0869661	1.88343	0.0013809	0.0112924	0.206425	0.0324927	FLT_LAR	Ext1	exostosin glycosyltransferase 1	14042
ENSMUSG00000028838	18	18	10	8	0.122927	6.55579	6.75753	7.2614	7.49173	102.375	123.1	No	93.5517	121.093	108.853	0.358196	0.279288	1.63251	0.00556303	0.0375615	0.637484	0.0789079	FLT_LAR	Extl1	exostosin-like glycosyltransferase 1	56219
ENSMUSG00000021952	18	18	10	8	0.084756	10.6694	10.7902	10.6997	10.8728	1729	1926.3	No	1610.38	1812.91	1722.9	0.169889	0.109162	2.41151	4.21364e-05	0.000494929	0.279052	0.0607271	FLT_LAR	Xpo4	exportin 4	57258
ENSMUSG00000083307	18	18	10	8	0.0889193	5.0619	5.27944	6.44753	6.67945	34.875	45.2	No	30.1963	42.331	36.9378	0.409742	0.177804	5.46799	2.22045e-16	9.41863e-15	0.587547	0.231938	FLT_LAR	AA414768	expressed sequence AA414768	245350
ENSMUSG00000035875	18	18	10	8	0.174312	4.5487	4.41027	6.37935	6.24176	28	21.2	No	28.8158	20.8826	24.4085	-0.455338	0.369328	1.52516	0.00959292	0.0601585	-0.0860102	-0.824666	GC_LAR	AI182371	expressed sequence AI182371	98870
ENSMUSG00000112388	18	18	10	8	0.111111	4.81296	4.68733	6.46863	6.34393	32.875	27.7	No	30.528	24.8187	27.3562	-0.28	0.222599	1.60504	0.00641393	0.0424566	-0.0574014	-0.502599	GC_LAR	AI463170	expressed sequence AI463170	100504549
ENSMUSG00000114828	18	18	10	8	0.0823072	6.44573	6.28382	7.29927	7.12189	92.875	80	No	96.1426	78.0758	86.1055	-0.287911	0.242675	1.41629	0.0161606	0.0936348	-0.0452356	-0.530586	GC_LAR	AI463229	expressed sequence AI463229	100042802
ENSMUSG00000045165	18	18	10	8	0.118822	7.73107	7.55431	8.18177	7.96668	244.375	195	No	225.117	182.759	201.585	-0.308563	0.13196	5.51041	2.22045e-16	9.41863e-15	-0.176603	-0.440524	GC_LAR	AI467606	expressed sequence AI467606	101602
ENSMUSG00000056145	18	18	10	8	0.0877631	7.31676	7.13863	7.87693	7.66939	172.5	142.3	No	170.817	140.521	153.986	-0.281544	0.198903	2.01062	0.000638704	0.00570753	-0.0826405	-0.480447	GC_LAR	AI504432	expressed sequence AI504432	229694
ENSMUSG00000078349	18	18	10	8	0.0884413	5.85954	5.99645	6.88558	7.02006	54.875	70.3	No	58.2261	67.7354	63.509	0.267562	0.213105	1.59104	0.00689128	0.0452632	0.480668	0.054457	FLT_LAR	AW011738	expressed sequence AW011738	100382
ENSMUSG00000085041	18	12	6	6	0.173913	0.574066	0.501754	5.50631	5.3777	1.75	0.9	No	2.81392	0.942675	1.77434	-1.34648	0.996959	1.98953	0.000728036	0.00643367	-0.349526	-2.34344	GC_LAR	BB031773	expressed sequence BB031773	100473
ENSMUSG00000039048	18	18	10	8	0.0830909	10.2259	10.2898	10.2937	10.3843	1282.5	1346.1	No	1187.59	1266.54	1231.45	0.0893649	0.0710185	1.58268	0.00719137	0.0469878	0.160383	0.0183464	FLT_LAR	Foxred1	FAD-dependent oxidoreductase domain containing 1	235169
ENSMUSG00000016552	18	18	10	8	0.132253	7.93448	8.19795	8.22578	8.56074	264.125	350.5	No	238.14	334.511	291.68	0.485198	0.264971	3.30486	1.99277e-08	3.98539e-07	0.750169	0.220227	FLT_LAR	Foxred2	FAD-dependent oxidoreductase domain containing 2	239554
ENSMUSG00000049119	18	18	10	8	0.0778669	7.72223	7.85819	8.09511	8.26337	216.875	250.3	No	207.023	239.781	225.222	0.206529	0.125423	2.69731	4.63164e-06	6.54527e-05	0.331952	0.0811065	FLT_LAR	Fam110b	family with sequence similarity 110, member B	242297
ENSMUSG00000006218	18	14	6	8	0.209677	1.65638	1.5287	5.69803	5.44759	4.875	2.3	No	5.00214	1.82522	3.23718	-1.29334	0.696774	3.52632	2.11498e-09	4.73377e-08	-0.596562	-1.99011	GC_LAR	Fam131c	family with sequence similarity 131, member C	277743
ENSMUSG00000015484	18	18	10	8	0.14115	5.82228	5.9761	6.85074	7.01408	62.375	84	No	55.0305	72.8532	64.932	0.400795	0.327862	1.4888	0.0114578	0.0698007	0.728657	0.0729329	FLT_LAR	Fam163a	family with sequence similarity 163, member A	329274
ENSMUSG00000037503	18	18	10	8	0.0886636	12.7374	12.8437	12.7226	12.8792	7522.25	8135.7	No	6785.14	7506.38	7185.83	0.145092	0.111818	1.67743	0.004389	0.0306822	0.25691	0.0332735	FLT_LAR	Fam168b	family with sequence similarity 168, member B	214469
ENSMUSG00000078127	18	9	4	5	0.230769	-0.382023	-0.432673	5.42832	5.30049	1.125	0.4	No	1.65565	0.412566	0.965049	-1.75238	1.1943	2.31512	8.43285e-05	0.000918706	-0.558084	-2.94668	GC_LAR	Fam170b	family with sequence similarity 170, member B	105511
ENSMUSG00000035595	18	18	10	8	0.112043	8.07705	7.96384	8.43934	8.29549	298.125	262.2	No	284.243	246.587	263.323	-0.197665	0.147672	1.79788	0.00226324	0.0174395	-0.0499935	-0.345337	GC_LAR	Fam174c	family with sequence similarity 174, member C	69770
ENSMUSG00000051515	18	18	10	8	0.15411	3.70795	3.83451	5.99911	6.11463	12.625	19.1	No	11.7182	16.4703	14.3582	0.519167	0.353858	2.1706	0.000227532	0.00225381	0.873024	0.165309	FLT_LAR	Fam181b	family with sequence similarity 181, member B	58238
ENSMUSG00000019856	18	18	10	8	0.0928771	6.12692	6.29173	7.01759	7.19218	70.75	86.6	No	67.5742	82.4619	75.8451	0.283378	0.165338	2.91897	7.1491e-07	1.15064e-05	0.448716	0.118039	FLT_LAR	Fam184a	family with sequence similarity 184, member A	75906
ENSMUSG00000015879	18	18	10	8	0.103136	7.21323	7.33013	7.72361	7.8625	158.5	182.5	No	146.539	166.381	157.562	0.181643	0.148769	1.4957	0.0110807	0.0678488	0.330413	0.0328737	FLT_LAR	Fam184b	family with sequence similarity 184, member B	58227
ENSMUSG00000032305	18	18	10	8	0.0818317	9.24445	9.31746	9.38626	9.48631	647	692.2	No	599.724	646.5	625.71	0.102281	0.0689123	2.21855	0.000164727	0.00168895	0.171193	0.0333683	FLT_LAR	Fam219b	family with sequence similarity 219, member B	78323
ENSMUSG00000047115	18	18	10	8	0.101415	8.16389	7.82427	8.56957	8.14048	346.75	231.4	No	337.112	217.203	270.496	-0.630431	0.246741	6.57261	2.22045e-16	9.41863e-15	-0.38369	-0.877171	GC_LAR	Fam221a	family with sequence similarity 221, member A	231946
ENSMUSG00000043633	18	18	10	8	0.143406	5.41181	5.14745	6.76918	6.51053	53.75	35.1	No	50.3986	34.332	41.4727	-0.568055	0.313142	3.31232	1.85203e-08	3.72374e-07	-0.254913	-0.881197	GC_LAR	Fam221b	family with sequence similarity 221, member B	242408
ENSMUSG00000037750	18	18	10	8	0.0852777	8.72169	8.83744	8.91659	9.06969	431.5	499.1	No	418.471	471.225	447.778	0.173793	0.133833	1.67704	0.004398	0.0307369	0.307626	0.0399597	FLT_LAR	Fam222b	family with sequence similarity 222, member B	216971
ENSMUSG00000037339	18	18	10	8	0.0772076	10.0744	10.1395	10.1514	10.2428	1125.5	1208.2	No	1066.15	1141.6	1108.07	0.0986867	0.0592012	2.7721	2.50352e-06	3.69473e-05	0.157888	0.0394855	FLT_LAR	Fam53a	family with sequence similarity 53, member A	74504
ENSMUSG00000050592	18	18	10	8	0.113135	6.82965	6.68298	7.53661	7.36771	126.375	107.5	No	125.33	101.334	111.999	-0.29553	0.21769	1.84974	0.00168145	0.0133799	-0.07784	-0.51322	GC_LAR	Fam78a	family with sequence similarity 78, member A	241303
ENSMUSG00000032224	18	18	10	8	0.15142	5.41659	5.59865	6.62933	6.82748	44.375	59.6	No	40.3061	57.7626	50.0042	0.497679	0.331187	2.23804	0.000144199	0.00149834	0.828866	0.166492	FLT_LAR	Fam81a	family with sequence similarity 81, member A	76886
ENSMUSG00000025384	18	18	10	8	0.102825	9.49104	9.681	9.57802	9.84038	760.375	941.9	No	699.408	857.078	787.002	0.290901	0.12908	5.04687	2.22045e-16	9.41863e-15	0.419981	0.161821	FLT_LAR	Faap100	Fanconi anemia core complex associated protein 100	71885
ENSMUSG00000028453	18	18	10	8	0.0872609	8.30909	8.2057	8.62437	8.49204	344.875	309.7	No	325.566	291.957	306.894	-0.157602	0.097625	2.6129	9.10196e-06	0.000122316	-0.0599769	-0.255227	GC_LAR	Fancg	Fanconi anemia, complementation group G	60534
ENSMUSG00000025380	18	11	5	6	0.157895	0.0912386	0.0426196	5.46838	5.33996	1.5	0.7	No	1.85272	0.693876	1.20892	-1.21109	0.992954	1.6217	0.00588514	0.0394628	-0.218135	-2.20404	GC_LAR	Fscn2	fascin actin-bundling protein 2	238021
ENSMUSG00000021532	18	18	10	8	0.0833265	9.2254	9.34292	9.3575	9.51841	631.25	707.1	No	587.863	665.984	631.264	0.17822	0.0991787	3.21591	4.71966e-08	8.98786e-07	0.277399	0.0790417	FLT_LAR	Fastkd3	FAST kinase domains 3	69577
ENSMUSG00000070047	18	18	10	8	0.079961	14.5462	14.6976	14.5042	14.7318	25261.2	28978.7	No	24066.6	27358.7	25895.6	0.184953	0.155769	1.40221	0.017249	0.0987875	0.340722	0.0291833	FLT_LAR	Fat1	FAT atypical cadherin 1	14107
ENSMUSG00000048486	18	18	10	8	0.09638	9.81872	9.97176	9.88747	10.1021	1002.5	1137.2	No	894.698	1046.88	979.241	0.223652	0.158078	1.99218	0.000716195	0.00634182	0.38173	0.0655748	FLT_LAR	Fitm2	fat storage-inducing transmembrane protein 2	228859
ENSMUSG00000054422	18	18	10	8	0.402813	5.07112	4.54892	6.7041	6.21628	70.875	21.5	No	69.2535	20.5775	42.2113	-1.75554	0.584577	8.92144	2.22045e-16	9.41863e-15	-1.17096	-2.34012	GC_LAR	Fabp1	fatty acid binding protein 1, liver	14080
ENSMUSG00000027533	18	18	10	8	0.180751	8.94031	8.77353	9.17631	8.95656	623.625	454.9	No	543.59	428.351	479.568	-0.347213	0.200707	3.01553	3.03524e-07	5.18672e-06	-0.146506	-0.54792	GC_LAR	Fabp5	fatty acid binding protein 5, epidermal	16592
ENSMUSG00000020405	18	18	10	8	0.244423	8.37294	10.1238	8.1619	10.5183	301.25	2040.7	No	254.145	1901.32	1169.24	2.9022	0.476481	30.3708	2.22045e-16	9.41863e-15	3.37868	2.42572	FLT_LAR	Fabp6	fatty acid binding protein 6	16204
ENSMUSG00000024664	18	18	10	8	0.105326	9.37775	9.21393	9.56694	9.34256	786.375	625.1	No	700.848	589.839	639.176	-0.252849	0.160558	2.49609	2.24428e-05	0.000278933	-0.0922907	-0.413406	GC_LAR	Fads3	fatty acid desaturase 3	60527
ENSMUSG00000044788	18	18	10	8	0.118745	6.86099	6.97903	7.48433	7.62055	118.125	141.3	No	113.98	137.757	127.19	0.276042	0.225696	1.4821	0.0118344	0.0718286	0.501738	0.0503464	FLT_LAR	Fads6	fatty acid desaturase domain family, member 6	328035
ENSMUSG00000025153	18	18	10	8	0.100531	13.8772	13.6435	13.9395	13.5908	17804.8	14674.6	No	16186.3	13191.1	14522.3	-0.29524	0.236141	1.57239	0.00757658	0.0491992	-0.0590982	-0.531381	GC_LAR	Fasn	fatty acid synthase	14104
ENSMUSG00000048520	18	18	10	8	0.0839695	2.91635	2.79912	5.90864	5.77228	8.25	6.5	No	10.1717	6.04977	7.88174	-0.556261	0.416168	2.03758	0.000539353	0.00492003	-0.140093	-0.972429	GC_LAR	Fbxl13	F-box and leucine-rich repeat protein 13	320118
ENSMUSG00000050503	18	18	10	8	0.0891906	9.91667	9.76686	10.0587	9.84896	1058	936.3	No	1019.81	859.902	930.974	-0.244578	0.149299	2.69652	4.66122e-06	6.58001e-05	-0.0952789	-0.393877	GC_LAR	Fbxl22	F-box and leucine-rich repeat protein 22	74165
ENSMUSG00000049314	18	15	9	6	0.169231	1.56903	1.64686	5.49471	5.63564	2.5	4.5	No	2.09414	3.89791	3.09623	0.820259	0.595995	2.00386	0.000666144	0.00592857	1.41625	0.224264	FLT_LAR	Fbxw13	F-box and WD-40 domain protein 13	211305
ENSMUSG00000015095	18	18	10	8	0.0821864	10.8181	10.8752	10.8602	10.9417	1918.25	2047.5	No	1787.86	1900.39	1850.37	0.0869681	0.0633562	1.88458	0.00137155	0.0112264	0.150324	0.0236119	FLT_LAR	Fbxw5	F-box and WD-40 domain protein 5	30839
ENSMUSG00000028086	18	18	10	8	0.0833264	10.236	10.304	10.302	10.3985	1291.12	1364.9	No	1194.68	1284.23	1244.43	0.100688	0.0850171	1.40196	0.0172686	0.0988129	0.185705	0.0156706	FLT_LAR	Fbxw7	F-box and WD-40 domain protein 7	50754
ENSMUSG00000034391	18	14	6	8	0.171429	0.857415	0.776421	5.58663	5.38874	2.75	1.3	No	2.85781	1.08846	1.87484	-1.20053	0.749715	2.64739	6.92318e-06	9.48295e-05	-0.45081	-1.95024	GC_LAR	Fbxo15	F-box protein 15	50764
ENSMUSG00000047013	18	18	10	8	0.11236	4.87921	5.03021	6.40297	6.55439	29.875	38.4	No	27.5366	35.372	31.8896	0.34495	0.217308	2.53912	1.6166e-05	0.000207087	0.562257	0.127642	FLT_LAR	Fbxo41	F-box protein 41	330369
ENSMUSG00000058715	18	18	10	8	0.118677	8.30187	8.20018	8.61475	8.48765	385.375	314.4	No	334.456	291.301	310.481	-0.210163	0.165045	1.64169	0.00530228	0.0360602	-0.0451175	-0.375208	GC_LAR	Fcer1g	Fc receptor, IgE, high affinity I, gamma polypeptide	14127
ENSMUSG00000026656	18	18	10	8	0.0895561	8.73458	8.56747	8.99954	8.78033	472.75	387.8	No	450.578	373.308	407.65	-0.273273	0.149132	3.37309	1.01322e-08	2.10147e-07	-0.124141	-0.422404	GC_LAR	Fcgr2b	Fc receptor, IgG, low affinity IIb	14130
ENSMUSG00000059498	18	18	10	8	0.115756	8.95883	8.86192	9.17489	9.04746	589.875	492.2	No	520.201	462.158	487.955	-0.178046	0.147269	1.47314	0.0123558	0.074546	-0.0307764	-0.325315	GC_LAR	Fcgr3	Fc receptor, IgG, low affinity III	14131
ENSMUSG00000048031	18	18	10	8	0.156832	5.20408	4.89096	6.69401	6.3883	46.125	27.5	No	45.7614	27.5833	35.6625	-0.735361	0.320359	5.28196	2.22045e-16	9.41863e-15	-0.415002	-1.05572	GC_LAR	Fcrl5	Fc receptor-like 5	329693
ENSMUSG00000038421	18	18	10	8	0.156951	7.86352	7.56142	8.31873	7.94973	290.625	191.2	No	265.34	184.646	220.51	-0.526643	0.241204	4.80597	2.22045e-16	9.41863e-15	-0.28544	-0.767847	GC_LAR	Fcrla	Fc receptor-like A	98752
ENSMUSG00000070524	18	8	3	5	0.25	0.0429581	-0.0353427	5.45249	5.27892	2	0.4	No	1.89942	0.342772	1.03462	-2.30302	1.20954	3.84792	6.36535e-11	1.69436e-09	-1.09348	-3.51256	GC_LAR	Fcrlb	Fc receptor-like B	435653
ENSMUSG00000066595	18	18	10	8	0.0873076	9.43077	9.59504	9.52955	9.75681	753.375	858.8	No	677.983	797.978	744.647	0.229833	0.119345	3.69617	3.44774e-10	8.49785e-09	0.349178	0.110487	FLT_LAR	Flvcr1	feline leukemia virus subgroup C cellular receptor 1	226844
ENSMUSG00000043683	18	18	10	8	0.0857756	11.5875	11.7104	11.5885	11.7664	3246.12	3691.6	No	3014.57	3430.61	3245.7	0.185895	0.0809091	5.25386	2.22045e-16	9.41863e-15	0.266804	0.104986	FLT_LAR	Fem1a	fem 1 homolog a	14154
ENSMUSG00000078157	18	18	10	8	0.11242	5.47677	5.63342	6.67578	6.83459	44	58.2	No	41.8777	53.9549	48.5873	0.375403	0.201469	3.44991	4.65803e-09	1.00493e-07	0.576872	0.173934	FLT_LAR	Fem1al	fem-1 homolog A like	216622
ENSMUSG00000035615	18	18	10	8	0.109804	4.54423	4.71882	6.26154	6.43453	23.375	32.3	No	21.3415	29.8982	26.0953	0.470929	0.28748	2.68224	5.23295e-06	7.30474e-05	0.758408	0.183449	FLT_LAR	Frmpd1	FERM and PDZ domain containing 1	666060
ENSMUSG00000042425	18	18	10	8	0.192308	3.17858	3.3176	5.8491	5.98943	7.375	12.3	No	8.73333	12.5232	10.8388	0.64921	0.481376	1.78483	0.00243617	0.0185599	1.13059	0.167834	FLT_LAR	Frmpd3	FERM and PDZ domain containing 3	245643
ENSMUSG00000049122	18	18	10	8	0.108345	6.30684	6.10003	7.22693	7.00374	90.125	76.5	No	88.5762	68.8096	77.5947	-0.345067	0.272047	1.61586	0.00606576	0.0404779	-0.07302	-0.617113	GC_LAR	Frmd3	FERM domain containing 3	242506
ENSMUSG00000027238	18	18	10	8	0.0826613	5.71924	5.62219	6.86704	6.76989	59	52	No	55.384	48.3907	51.4988	-0.203278	0.16787	1.47733	0.0121096	0.0732286	-0.0354086	-0.371148	GC_LAR	Frmd5	FERM domain containing 5	228564
ENSMUSG00000048285	18	18	10	8	0.0805299	10.2894	10.4405	10.33	10.5446	1318.62	1534.2	No	1221.01	1439.1	1342.17	0.235396	0.11214	4.38023	1.01474e-13	3.43459e-12	0.347536	0.123256	FLT_LAR	Frmd6	FERM domain containing 6	319710
ENSMUSG00000036131	18	18	10	8	0.104972	3.12897	3.26378	5.8207	5.98145	8.25	11.5	No	7.2086	11.0915	9.36578	0.523084	0.312099	2.84339	1.37281e-06	2.10639e-05	0.835183	0.210985	FLT_LAR	Frmd7	FERM domain containing 7	385354
ENSMUSG00000024965	18	18	10	8	0.100549	9.07182	8.96667	9.27853	9.13728	588.625	530.6	No	558.143	496.754	524.038	-0.165711	0.131834	1.58466	0.00711906	0.0465731	-0.0338777	-0.297545	GC_LAR	Fermt3	fermitin family member 3	108101
ENSMUSG00000033386	18	18	10	8	0.0898044	11.2119	11.403	11.2045	11.4786	2443.38	2974.9	No	2303.78	2837.24	2600.15	0.299955	0.133017	5.03867	2.22045e-16	9.41863e-15	0.432972	0.166938	FLT_LAR	Frrs1	ferric-chelate reductase 1	20321
ENSMUSG00000062382	18	18	10	8	0.1046	7.38019	7.26159	7.90528	7.76527	191.875	163.9	No	175.077	152.395	162.476	-0.204884	0.166064	1.53271	0.00924128	0.0583381	-0.0388198	-0.370948	GC_LAR	Ftl1-ps2	ferritin light polypeptide, pseudogene 2	434624
ENSMUSG00000022871	18	18	10	8	0.165698	4.06933	3.94519	6.1819	6.07327	22.625	16.3	No	20.3028	14.7094	17.1954	-0.486604	0.40034	1.51558	0.0100561	0.0624921	-0.0862636	-0.886944	GC_LAR	Fetub	fetuin beta	59083
ENSMUSG00000051000	18	18	10	8	0.0744948	10.271	10.3922	10.3217	10.4925	1265.88	1451.9	No	1212.05	1379.48	1305.06	0.188088	0.0962201	3.79894	1.10592e-10	2.87967e-09	0.284308	0.091868	FLT_LAR	Fhip1a	FHF complex subunit HOOK interacting protein 1A	229488
ENSMUSG00000028001	18	18	10	8	0.411282	5.34351	4.62454	6.88429	6.20991	88.75	26.5	No	90.4897	26.7579	55.0832	-1.76052	0.800306	4.76983	4.44089e-16	1.85973e-14	-0.960213	-2.56082	GC_LAR	Fga	fibrinogen alpha chain	14161
ENSMUSG00000033831	18	18	10	8	0.494903	5.42122	4.70814	6.93124	6.25754	104	24.7	No	108.283	24.4692	61.7199	-2.14859	0.665655	10.1042	2.22045e-16	9.41863e-15	-1.48294	-2.81425	GC_LAR	Fgb	fibrinogen beta chain	110135
ENSMUSG00000026841	18	18	10	8	0.138158	4.96907	5.1572	6.40079	6.61397	35.375	47.7	No	29.531	41.5266	36.1952	0.461126	0.368104	1.58377	0.00715166	0.0467632	0.82923	0.0930214	FLT_LAR	Fibcd1	fibrinogen C domain containing 1	98970
ENSMUSG00000033860	18	18	10	8	0.45045	4.79304	4.11016	6.63918	6.02251	63.375	15.9	No	65.4309	15.9185	37.924	-2.04345	0.702607	8.25307	2.22045e-16	9.41863e-15	-1.34084	-2.74605	GC_LAR	Fgg	fibrinogen gamma chain	99571
ENSMUSG00000022523	18	18	10	8	0.0885874	5.89434	6.06801	6.88096	7.06635	61.5	76.1	No	55.9841	71.0901	64.3763	0.321874	0.142717	5.13244	2.22045e-16	9.41863e-15	0.464592	0.179157	FLT_LAR	Fgf12	fibroblast growth factor 12	14167
ENSMUSG00000025551	18	18	10	8	0.0980684	5.00107	5.13137	6.45303	6.59354	33.875	40.2	No	30.0282	37.6468	34.2608	0.271649	0.198606	1.92744	0.00106278	0.00898717	0.470255	0.0730432	FLT_LAR	Fgf14	fibroblast growth factor 14	14169
ENSMUSG00000031073	18	9	7	2	0.324324	0.759908	0.86032	5.3071	5.51021	0.75	3.1	No	0.760666	2.94885	1.97632	1.88329	1.21339	2.37337	5.56152e-05	0.000634269	3.09668	0.669899	FLT_LAR	Fgf15	fibroblast growth factor 15	14170
ENSMUSG00000057967	18	18	10	8	0.11054	4.3267	4.11093	6.31105	6.10073	26.75	17.5	No	23.5021	15.5665	19.0935	-0.6127	0.281701	4.89396	2.22045e-16	9.41863e-15	-0.330999	-0.894401	GC_LAR	Fgf18	fibroblast growth factor 18	14172
ENSMUSG00000037225	18	18	10	8	0.0828221	9.28369	9.47192	9.39128	9.64877	652.875	781.7	No	605.334	745.302	683.094	0.296845	0.140196	4.44816	4.21885e-14	1.49128e-12	0.437041	0.156649	FLT_LAR	Fgf2	fibroblast growth factor 2	14173
ENSMUSG00000047632	18	18	10	8	0.0921228	5.19407	5.32194	6.5465	6.67733	37.375	45	No	34.47	42.0573	38.6852	0.264994	0.150558	3.14234	9.47011e-08	1.74164e-06	0.415552	0.114435	FLT_LAR	Fgfbp3	fibroblast growth factor binding protein 3	72514
ENSMUSG00000005320	18	18	10	8	0.0949899	8.61117	8.77359	8.8092	9.0233	421.125	507.4	No	388.925	463.181	430.178	0.25176	0.193058	1.6901	0.00410111	0.0290167	0.444818	0.0587023	FLT_LAR	Fgfr4	fibroblast growth factor receptor 4	14186
ENSMUSG00000047787	18	18	10	8	0.104243	7.83555	8.08457	8.15386	8.46686	232.75	304	No	222.017	294.971	262.547	0.404965	0.209973	3.67567	4.30991e-10	1.0534e-08	0.614938	0.194993	FLT_LAR	Flrt1	fibronectin leucine rich transmembrane protein 1	396184
ENSMUSG00000038663	18	18	10	8	0.131183	4.62349	4.38931	6.43074	6.20333	32.125	20.8	No	29.684	20.0115	24.3104	-0.581569	0.357177	2.66993	5.77877e-06	7.99872e-05	-0.224392	-0.938746	GC_LAR	Fsd2	fibronectin type III and SPRY domain containing 2	244091
ENSMUSG00000074738	18	18	10	8	0.0953935	7.08051	7.18388	7.63399	7.75505	141.375	162.6	No	132.424	149.731	142.039	0.179499	0.117551	2.34108	7.0134e-05	0.000779237	0.29705	0.0619476	FLT_LAR	Fndc10	fibronectin type III domain containing 10	230991
ENSMUSG00000001334	18	18	10	8	0.115752	7.80125	7.48376	8.27309	7.8903	273.75	200	No	249.593	184.978	213.696	-0.432441	0.286887	2.28991	0.000100682	0.00107899	-0.145554	-0.719327	GC_LAR	Fndc5	fibronectin type III domain containing 5	384061
ENSMUSG00000045326	18	18	10	8	0.103943	4.93529	4.74333	6.53998	6.35065	36.375	26.7	No	34.7071	24.8117	29.2096	-0.471928	0.210004	5.07245	2.22045e-16	9.41863e-15	-0.261925	-0.681932	GC_LAR	Fndc7	fibronectin type III domain containing 7	320181
ENSMUSG00000053334	18	18	10	8	0.0899298	8.91924	9.04078	9.0852	9.24854	527.625	589.8	No	476.431	548.386	516.406	0.198867	0.14564	1.85906	0.00159275	0.0127667	0.344507	0.053227	FLT_LAR	Ficd	FIC domain containing	231630
ENSMUSG00000029227	18	18	10	8	0.0794043	11.2167	11.2865	11.2413	11.3426	2555.38	2689.7	No	2356.09	2526.31	2450.66	0.0959331	0.0575589	2.77955	2.35284e-06	3.4959e-05	0.153492	0.0383742	FLT_LAR	Fip1l1	FIP1 like 1 (S. cerevisiae)	66899
ENSMUSG00000032966	18	18	10	8	0.0768318	11.0444	10.9493	11.1145	10.9813	2172.25	2053.6	No	2232.63	1959.96	2081.15	-0.185329	0.156025	1.41539	0.0162279	0.0938798	-0.029304	-0.341353	GC_LAR	Fkbp1a	FK506 binding protein 1a	14225
ENSMUSG00000020635	18	18	10	8	0.0947547	6.52769	6.41639	7.32702	7.20696	104.125	94	No	95.778	84.574	89.5536	-0.177497	0.149432	1.45068	0.0137522	0.0814935	-0.0280648	-0.326929	GC_LAR	Fkbp1b	FK506 binding protein 1b	14226
ENSMUSG00000024222	18	18	10	8	0.0952986	12.3039	12.4649	12.2796	12.5127	5370.75	6406.6	No	4990.81	5942.61	5519.59	0.251678	0.166163	2.2769	0.000110254	0.00116919	0.417841	0.0855155	FLT_LAR	Fkbp5	FK506 binding protein 5	14229
ENSMUSG00000040170	18	18	10	8	0.103104	12.5289	12.7229	12.4876	12.7761	6731.5	7644.4	No	5957.11	7056.25	6567.74	0.243838	0.183577	1.75166	0.00293156	0.0217604	0.427416	0.0602608	FLT_LAR	Fmo2	flavin containing monooxygenase 2	55990
ENSMUSG00000002812	18	18	10	8	0.0940533	12.8883	13.0147	12.866	13.0506	8432.88	9482.8	No	7530.27	8584.48	8115.94	0.188682	0.149718	1.57988	0.00729442	0.0475784	0.3384	0.0389643	FLT_LAR	Flii	flightless I actin binding protein	14248
ENSMUSG00000023911	18	18	10	8	0.109182	7.58967	7.31449	8.1033	7.76869	221	163	No	210.224	151.393	177.54	-0.464618	0.139627	11.1325	2.22045e-16	9.41863e-15	-0.32499	-0.604245	GC_LAR	Flywch2	FLYWCH family member 2	76917
ENSMUSG00000029648	18	18	10	8	0.0822442	10.4195	10.5882	10.4473	10.6883	1462.88	1706.5	No	1356.05	1595.59	1489.13	0.233237	0.144695	2.58237	1.15652e-05	0.000152374	0.377932	0.0885425	FLT_LAR	Flt1	FMS-like tyrosine kinase 1	14254
ENSMUSG00000042817	18	18	10	8	0.121098	7.55285	7.41619	8.03657	7.87321	240.125	179.5	No	212.452	167.881	187.69	-0.348149	0.238526	2.15167	0.000258015	0.00253097	-0.109623	-0.586675	GC_LAR	Flt3	FMS-like tyrosine kinase 3	14255
ENSMUSG00000038368	18	18	10	8	0.081306	10.0852	10.1841	10.1517	10.2915	1154.88	1262.9	No	1075.6	1185.71	1136.77	0.138427	0.0984887	1.97029	0.000819487	0.00714816	0.236916	0.0399386	FLT_LAR	Focad	focadhesin	230393
ENSMUSG00000061175	18	18	10	8	0.0756903	11.738	11.8661	11.7334	11.9194	3558.25	3998.4	No	3372.07	3837.52	3630.66	0.185912	0.116941	2.51411	1.95734e-05	0.000246179	0.302853	0.068971	FLT_LAR	Fnip2	folliculin interacting protein 2	329679
ENSMUSG00000021765	18	18	10	8	0.131127	6.20288	6.36786	7.06741	7.24774	73.625	98.2	No	72.8351	97.8991	86.7595	0.4346	0.327891	1.72672	0.00336272	0.0245383	0.762491	0.10671	FLT_LAR	Fst	follistatin	14313
ENSMUSG00000034098	18	18	10	8	0.136121	6.43219	6.62364	7.1854	7.40449	97	128.1	No	83.9202	112.422	99.7545	0.412619	0.29504	1.94725	0.000942983	0.00808065	0.707659	0.117579	FLT_LAR	Fstl5	follistatin-like 5	213262
ENSMUSG00000009566	18	18	10	8	0.0957712	9.15756	9.32138	9.28439	9.50668	619.75	745.7	No	561.148	678.608	626.404	0.272439	0.179476	2.28915	0.000101222	0.00108389	0.451915	0.0929626	FLT_LAR	Fpgs	folylpolyglutamyl synthetase	14287
ENSMUSG00000042812	18	18	10	8	0.0860519	10.0517	10.1946	10.1082	10.3099	1152.62	1303.3	No	1042.03	1206.61	1133.46	0.207412	0.109864	3.55253	1.60716e-09	3.65314e-08	0.317275	0.0975481	FLT_LAR	Foxf1	forkhead box F1	15227
ENSMUSG00000038402	18	18	10	8	0.0946498	8.73484	8.88307	8.91746	9.11556	459.625	538.8	No	416.193	490.262	457.343	0.230003	0.125757	3.34519	1.33828e-08	2.73368e-07	0.35576	0.104246	FLT_LAR	Foxf2	forkhead box F2	14238
ENSMUSG00000032998	18	18	10	8	0.0795257	11.077	11.1429	11.1076	11.2022	2251.25	2407.7	No	2137.66	2288.64	2221.54	0.0985689	0.0620026	2.52032	1.86693e-05	0.000236277	0.160571	0.0365662	FLT_LAR	Foxj3	forkhead box J3	230700
ENSMUSG00000044167	18	18	10	8	0.0730589	10.5916	10.7311	10.6199	10.8194	1581.75	1810.2	No	1530.81	1753.34	1654.44	0.195699	0.136081	2.0559	0.000480286	0.00443195	0.33178	0.059618	FLT_LAR	Foxo1	forkhead box O1	56458
ENSMUSG00000048756	18	18	10	8	0.0823914	13.1664	13.2968	13.1422	13.3316	9607.25	11088	No	9046.9	10444.3	9823.21	0.207068	0.134022	2.37269	5.58917e-05	0.000636319	0.341089	0.0730457	FLT_LAR	Foxo3	forkhead box O3	56484
ENSMUSG00000052135	18	18	10	8	0.121693	5.08978	5.31424	6.47151	6.69958	33.5	48.8	No	31.1237	45.8689	39.3155	0.543665	0.285692	3.58965	1.08569e-09	2.53126e-08	0.829357	0.257972	FLT_LAR	Foxo6	forkhead box O6	329934
ENSMUSG00000001155	18	17	9	8	0.425	2.02556	1.78607	5.79071	5.49669	7.75	1.8	No	8.14841	1.8266	4.63629	-2.19804	0.70107	9.85821	2.22045e-16	9.41863e-15	-1.49697	-2.89911	GC_LAR	Ftcd	formiminotransferase cyclodeaminase	14317
ENSMUSG00000055805	18	18	10	8	0.13298	8.61787	8.51181	8.88429	8.74583	447.625	378.1	No	435.472	362.147	394.736	-0.265967	0.22008	1.46741	0.0126994	0.0763385	-0.0458867	-0.486048	GC_LAR	Fmnl1	formin-like 1	57778
ENSMUSG00000008136	18	18	10	8	0.104034	10.2485	10.0845	10.3721	10.1428	1368.12	1161.5	No	1282.41	1068.8	1163.74	-0.261342	0.141559	3.42559	5.96794e-09	1.27189e-07	-0.119783	-0.402901	GC_LAR	Fhl2	four and a half LIM domains 2	14200
ENSMUSG00000075012	18	18	10	8	0.102716	5.70676	5.8844	6.77022	6.9668	57.75	71.6	No	49.8833	64.4508	57.9763	0.339291	0.237859	2.07494	0.000425328	0.00397584	0.577151	0.101432	FLT_LAR	Fjx1	four jointed box 1	14221
ENSMUSG00000089665	18	18	10	8	0.177258	4.01889	3.73584	6.24914	5.96496	22.5	11.9	No	21.5982	11.4947	15.9851	-0.906806	0.407231	4.97746	2.22045e-16	9.41863e-15	-0.499576	-1.31404	GC_LAR	Fcor	Foxo1 corepressor	100503924
ENSMUSG00000042353	18	10	4	6	0.217391	0.495451	0.37064	5.53988	5.30391	2.375	0.4	No	3.19969	0.439349	1.66617	-2.80156	1.05702	6.91108	2.22045e-16	9.41863e-15	-1.74454	-3.85858	GC_LAR	Frem3	Fras1 related extracellular matrix protein 3	333315
ENSMUSG00000034687	18	18	10	8	0.0826141	7.82905	8.09845	8.14527	8.48091	229.625	302.9	No	222.423	290.854	260.44	0.385096	0.182282	4.41201	6.72795e-14	2.31292e-12	0.567378	0.202814	FLT_LAR	Fras1	Fraser extracellular matrix complex subunit 1	231470
ENSMUSG00000007989	18	18	10	8	0.0922979	8.82574	8.94541	9.00291	9.16512	487.875	552.3	No	448.878	516.211	486.286	0.198997	0.166305	1.42585	0.0154563	0.0900697	0.365302	0.0326913	FLT_LAR	Fzd3	frizzled class receptor 3	14365
ENSMUSG00000045005	18	18	10	8	0.0869608	12.417	12.5279	12.406	12.5673	5805.38	6522.8	No	5395.94	6055.26	5762.23	0.166174	0.107486	2.37918	5.33261e-05	0.000611611	0.27366	0.058688	FLT_LAR	Fzd5	frizzled class receptor 5	14367
ENSMUSG00000022297	18	18	10	8	0.0871769	9.37816	9.49917	9.49392	9.66053	710.5	793.2	No	655.766	741.069	703.156	0.17201	0.103172	2.77439	2.45627e-06	3.63315e-05	0.275182	0.0688378	FLT_LAR	Fzd6	frizzled class receptor 6	14368
ENSMUSG00000036904	18	18	10	8	0.0968579	9.33462	9.52968	9.43552	9.70239	673.625	848.7	No	622.347	777.277	708.419	0.31886	0.130756	5.90191	2.22045e-16	9.41863e-15	0.449616	0.188104	FLT_LAR	Fzd8	frizzled class receptor 8	14370
ENSMUSG00000036587	18	17	9	8	0.140187	2.65139	2.48154	5.87487	5.65798	7.625	4.6	No	9.6205	4.54131	6.79873	-0.981	0.586062	2.84769	1.32333e-06	2.04348e-05	-0.394938	-1.56706	GC_LAR	Fut7	fucosyltransferase 7	14347
ENSMUSG00000030630	18	18	10	8	0.105577	7.57281	7.38431	8.06342	7.84057	238.25	178.8	No	209.001	167.231	185.795	-0.330566	0.232923	2.03442	0.000550224	0.00501147	-0.0976429	-0.563489	GC_LAR	Fah	fumarylacetoacetate hydrolase	14085
ENSMUSG00000059412	18	18	10	8	0.113318	5.51489	5.31024	6.79946	6.59353	54.875	41.7	No	50.6467	37.7027	43.4556	-0.413219	0.204453	4.12642	2.41984e-12	7.26477e-11	-0.208766	-0.617671	GC_LAR	Fxyd2	FXYD domain-containing ion transport regulator 2	11936
ENSMUSG00000057092	18	18	10	8	0.114467	10.8543	10.7341	10.9353	10.7683	2149.75	1846.3	No	1979.4	1690.87	1819.1	-0.226836	0.178734	1.6184	0.00598664	0.0400516	-0.0481028	-0.40557	GC_LAR	Fxyd3	FXYD domain-containing ion transport regulator 3	17178
ENSMUSG00000009687	18	18	10	8	0.112551	9.28865	9.19398	9.46675	9.34079	744.75	623.2	No	655.159	581.514	614.246	-0.178242	0.148466	1.45236	0.013643	0.0809741	-0.0297766	-0.326708	GC_LAR	Fxyd5	FXYD domain-containing ion transport regulator 5	18301
ENSMUSG00000066705	18	18	10	8	0.10915	10.3818	10.2821	10.4816	10.3425	1510.88	1335.5	No	1392.34	1235.43	1305.17	-0.173	0.140176	1.52962	0.00938376	0.0591098	-0.0328247	-0.313176	GC_LAR	Fxyd6	FXYD domain-containing ion transport regulator 6	59095
ENSMUSG00000036578	18	18	10	8	0.128571	4.69296	4.80151	6.34473	6.44789	25.875	35.3	No	24.4307	30.5326	27.8207	0.345643	0.258687	1.8122	0.00208648	0.01622	0.604331	0.0869561	FLT_LAR	Fxyd7	FXYD domain-containing ion transport regulator 7	57780
ENSMUSG00000024013	18	18	10	8	0.0801473	8.7714	8.64595	9.0222	8.85452	469	412.1	No	455.768	397.587	423.445	-0.196978	0.142523	1.91611	0.00113747	0.00954163	-0.0544546	-0.339501	GC_LAR	Fgd2	FYVE, RhoGEF and PH domain containing 2	26382
ENSMUSG00000027774	18	18	10	8	0.0962145	11.1376	11.2945	11.1382	11.3653	2559	2927.1	No	2252.79	2631.27	2463.06	0.223264	0.178504	1.55495	0.00827182	0.0530199	0.401768	0.0447605	FLT_LAR	Gfm1	G elongation factor, mitochondrial 1	28030
ENSMUSG00000021666	18	18	10	8	0.0813212	11.0191	11.0587	11.0586	11.1154	2194.75	2307.1	No	2061.51	2148.43	2109.8	0.0595171	0.0480339	1.53593	0.00909505	0.057567	0.107551	0.0114832	FLT_LAR	Gfm2	G elongation factor, mitochondrial 2	320806
ENSMUSG00000034837	18	18	10	8	0.137931	2.6837	2.53805	5.87542	5.69871	8.25	5	No	8.675	4.70125	6.46736	-0.800143	0.428693	3.5508	1.63665e-09	3.71695e-08	-0.371451	-1.22884	GC_LAR	Gnat1	G protein subunit alpha transducin 1	14685
ENSMUSG00000028777	18	18	10	8	0.0995935	6.72291	6.53737	7.47198	7.26927	123.5	98	No	113.415	92.4591	101.773	-0.299277	0.208594	2.07124	0.000435507	0.00406367	-0.0906831	-0.507872	GC_LAR	Gnat3	G protein subunit alpha transducin 3	242851
ENSMUSG00000053101	18	18	10	8	0.104147	5.82893	5.67798	6.94016	6.78687	68.5	53.7	No	62.4788	50.0278	55.5616	-0.332188	0.226969	2.16562	0.000235199	0.00232537	-0.105218	-0.559157	GC_LAR	Gpr141	G protein-coupled receptor 141	353346
ENSMUSG00000047462	18	18	10	8	0.142444	6.19734	5.85233	7.19386	6.83736	103	55.9	No	88.1057	53.036	68.6225	-0.75623	0.247555	9.47288	2.22045e-16	9.41863e-15	-0.508676	-1.00378	GC_LAR	Gpr141b	G protein-coupled receptor 141B	319293
ENSMUSG00000047293	18	18	10	8	0.142367	4.99292	4.68217	6.59777	6.29059	41.125	25.4	No	37.4994	23.2297	29.5718	-0.689199	0.257446	7.26796	2.22045e-16	9.41863e-15	-0.431753	-0.946644	GC_LAR	Gpr15	G protein-coupled receptor 15	71223
ENSMUSG00000044724	18	14	6	8	0.188406	1.99802	1.83678	5.75105	5.48875	5.75	2.3	No	6.38402	2.60906	4.28682	-1.32419	0.798714	2.71422	4.03576e-06	5.76516e-05	-0.525472	-2.1229	GC_LAR	Gpr152	G protein-coupled receptor 152	269053
ENSMUSG00000047875	18	18	10	8	0.0893136	7.12154	6.9984	7.72339	7.58056	152.25	134.6	No	145.976	126.503	135.157	-0.200862	0.151853	1.75489	0.00287957	0.0214228	-0.0490093	-0.352715	GC_LAR	Gpr157	G protein-coupled receptor 157	269604
ENSMUSG00000038390	18	18	10	8	0.0941526	5.77933	5.58871	6.93071	6.72916	63	50.5	No	60.5172	46.1788	52.5514	-0.374378	0.201111	3.48288	3.31981e-09	7.29997e-08	-0.173268	-0.575489	GC_LAR	Gpr162	G protein-coupled receptor 162	14788
ENSMUSG00000050075	18	18	10	8	0.118881	7.0154	6.77705	7.68029	7.41507	146.75	111.4	No	140.083	110.421	123.604	-0.345405	0.230398	2.25664	0.00012688	0.00133153	-0.115007	-0.575803	GC_LAR	Gpr171	G protein-coupled receptor 171	229323
ENSMUSG00000058396	18	18	10	8	0.0979592	6.44515	6.55605	7.22529	7.33975	84.75	103.7	No	87.4695	97.1483	92.8466	0.205154	0.156438	1.75986	0.00280107	0.0209224	0.361593	0.0487159	FLT_LAR	Gpr182	G protein-coupled receptor 182	11536
ENSMUSG00000051212	18	18	10	8	0.118482	7.78378	7.60308	8.22525	8.00134	260.75	199.9	No	235.93	190.377	210.623	-0.319446	0.166696	3.70235	3.22256e-10	7.98023e-09	-0.15275	-0.486142	GC_LAR	Gpr183	G protein-coupled receptor 183	321019
ENSMUSG00000116935	18	15	9	6	0.215686	1.37073	1.30526	5.56071	5.5112	3.75	2.1	No	3.47469	1.96849	2.63791	-0.870678	0.684686	1.64475	0.00521795	0.035551	-0.185992	-1.55536	GC_LAR	Gpr31a	G protein-coupled receptor 31, D17Leh66a region	625031
ENSMUSG00000071311	18	17	10	7	0.121622	2.78357	2.97101	5.67516	5.92993	5.875	10.1	No	4.75944	10.0842	7.71762	0.927558	0.422967	4.86616	2.22045e-16	9.41863e-15	1.35052	0.504591	FLT_LAR	Gpr31b	G protein-coupled receptor 31, D17Leh66b region	436440
ENSMUSG00000040229	18	18	10	8	0.109457	7.54812	7.40575	8.03222	7.86385	229.625	179	No	199.909	166.415	181.301	-0.281094	0.164896	2.95139	5.37785e-07	8.84503e-06	-0.116199	-0.44599	GC_LAR	Gpr34	G protein-coupled receptor 34	23890
ENSMUSG00000026343	18	18	10	8	0.106534	8.3165	8.48657	8.56132	8.78037	329.625	411.2	No	313.444	380.821	350.876	0.285732	0.182062	2.4409	3.39267e-05	0.000405379	0.467795	0.10367	FLT_LAR	Gpr39	G protein-coupled receptor 39	71111
ENSMUSG00000044317	18	18	10	8	0.122977	5.0251	4.93494	6.5411	6.45526	37.75	31.6	No	36.0434	29.6233	32.4767	-0.296494	0.241397	1.51879	0.00989887	0.0616751	-0.0550962	-0.537891	GC_LAR	Gpr4	G protein-coupled receptor 4	319197
ENSMUSG00000049608	18	18	10	8	0.123311	7.56083	7.3961	8.04955	7.85356	219.125	179.9	No	199.942	167.882	182.131	-0.257165	0.183218	1.98545	0.000746603	0.00658007	-0.0739467	-0.440383	GC_LAR	Gpr55	G protein-coupled receptor 55	227326
ENSMUSG00000047415	18	18	10	8	0.0933771	7.50174	7.40194	7.98992	7.87001	197.5	177.2	No	187.194	167.223	176.099	-0.15946	0.11765	1.84278	0.00175056	0.013871	-0.0418099	-0.277111	GC_LAR	Gpr68	G protein-coupled receptor 68	238377
ENSMUSG00000048216	18	18	10	8	0.0961792	6.18525	6.30249	7.06304	7.18719	77.25	90	No	71.0046	82.0766	77.1557	0.212699	0.153566	1.93765	0.000999367	0.00848365	0.366265	0.0591328	FLT_LAR	Gpr85	G protein-coupled receptor 85	64450
ENSMUSG00000028096	18	18	10	8	0.0878516	11.6466	11.7714	11.6445	11.8262	3502.5	3867.2	No	3169.19	3584.17	3399.74	0.176402	0.112282	2.45737	3.00178e-05	0.00036246	0.288684	0.0641196	FLT_LAR	Gpr89	G protein-coupled receptor 89	67549
ENSMUSG00000043384	18	18	10	8	0.0899571	10.556	10.6852	10.5884	10.7739	1622.38	1824.7	No	1491.44	1684.01	1598.42	0.17302	0.110842	2.42841	3.72091e-05	0.000440794	0.283862	0.0621786	FLT_LAR	Gprasp1	G protein-coupled receptor associated sorting protein 1	67298
ENSMUSG00000072966	18	18	10	8	0.0903737	7.84541	8.01245	8.17862	8.39111	252.625	290.3	No	226.559	269.352	250.333	0.235303	0.154465	2.32728	7.73687e-05	0.000849216	0.389768	0.0808385	FLT_LAR	Gprasp2	G protein-coupled receptor associated sorting protein 2	245607
ENSMUSG00000019905	18	11	8	3	0.214286	-0.460292	-0.426698	5.28443	5.41854	0.375	1.1	No	0.299677	1.06506	0.724892	1.39928	1.06935	1.96973	0.000822276	0.00716773	2.46862	0.329933	FLT_LAR	Gprc6a	G protein-coupled receptor, family C, group 6, member A	210198
ENSMUSG00000009633	18	18	10	8	0.110092	7.55467	7.37712	8.04867	7.83783	221.625	182.4	No	200.043	167.049	181.713	-0.262829	0.203863	1.67438	0.00446082	0.0311181	-0.0589662	-0.466693	GC_LAR	G0s2	G0/G1 switch gene 2	14373
ENSMUSG00000071723	18	18	10	8	0.0904136	7.17668	7.39557	7.66856	7.93023	153.375	189.2	No	137.779	176.788	159.451	0.330482	0.111787	8.79961	2.22045e-16	9.41863e-15	0.442269	0.218695	FLT_LAR	Gspt2	G1 to S phase transition 2	14853
ENSMUSG00000036073	18	18	10	8	0.0840309	9.8236	9.9318	9.90567	10.0571	961.25	1070.8	No	890.009	996.012	948.899	0.160312	0.074606	4.61001	4.88498e-15	1.89484e-13	0.234918	0.0857058	FLT_LAR	Galt	galactose-1-phosphate uridyl transferase	14430
ENSMUSG00000024553	18	18	10	8	0.109341	5.99069	6.13757	6.94064	7.10253	67.75	83.9	No	61.0495	78.4087	70.6935	0.346102	0.253704	1.85715	0.00161059	0.0128839	0.599806	0.0923978	FLT_LAR	Galr1	galanin receptor 1	14427
ENSMUSG00000020793	18	18	10	8	0.117061	6.16076	6.31965	7.03503	7.21114	75.25	100.4	No	68.7967	89.0694	80.0593	0.368032	0.258379	2.02392	0.000587756	0.00530271	0.626411	0.109654	FLT_LAR	Galr2	galanin receptor 2	14428
ENSMUSG00000031343	18	18	10	8	0.0935143	7.5495	7.71927	7.95322	8.16273	204.25	234.4	No	182.33	220.311	203.431	0.255638	0.142993	3.20128	5.42753e-08	1.02986e-06	0.398632	0.112645	FLT_LAR	Gabra3	gamma-aminobutyric acid (GABA) A receptor, subunit alpha 3	14396
ENSMUSG00000029211	18	17	9	8	0.715698	4.14798	4.19262	6.14235	6.26546	16.125	68	No	17.9991	78.5949	14.0157	-0.668859	0.459806	2.1383	0.000281829	0.00274106	-0.209053	-1.12867	GC_LAR	Gabra4	gamma-aminobutyric acid (GABA) A receptor, subunit alpha 4	14397
ENSMUSG00000031344	18	18	10	8	0.118329	4.38457	4.53376	6.20949	6.36331	21.625	25.8	No	19.1475	26.3941	23.1734	0.405084	0.297693	1.84263	0.00175211	0.0138756	0.702776	0.107391	FLT_LAR	Gabrq	gamma-aminobutyric acid (GABA) A receptor, subunit theta	57249
ENSMUSG00000031950	18	18	10	8	0.108414	11.7798	11.6807	11.8304	11.6914	3893.88	3421.9	No	3692.15	3248.33	3445.58	-0.184446	0.144304	1.63998	0.00534998	0.0363111	-0.0401417	-0.32875	GC_LAR	Gabarapl2	gamma-aminobutyric acid (GABA) A receptor-associated protein-like 2	93739
ENSMUSG00000027603	18	18	10	8	0.103365	6.67883	6.78911	7.36653	7.48875	103.375	125.3	No	100.328	114.361	108.124	0.218415	0.130817	2.77382	2.46787e-06	3.64621e-05	0.349232	0.0875983	FLT_LAR	Ggt7	gamma-glutamyltransferase 7	207182
ENSMUSG00000017943	18	18	10	8	0.100407	5.17952	5.25536	6.55935	6.6335	37.375	43.8	No	35.0124	39.7806	37.6614	0.202276	0.166111	1.51858	0.00990867	0.0617215	0.368387	0.0361659	FLT_LAR	Gdap1l1	ganglioside-induced differentiation-associated protein 1-like 1	228858
ENSMUSG00000049908	18	9	4	5	0.35	0.366324	0.26344	5.47584	5.31576	1.625	0.7	No	3.4819	0.571855	1.86521	-2.27662	1.28908	3.19584	5.71582e-08	1.07989e-06	-0.987544	-3.5657	GC_LAR	Gja8	gap junction protein, alpha 8	14616
ENSMUSG00000042357	18	18	10	8	0.0974373	7.64705	7.44974	8.12617	7.8869	236.125	185.7	No	221.713	173.743	195.063	-0.353261	0.23059	2.3626	6.0106e-05	0.000679591	-0.122671	-0.583851	GC_LAR	Gjb5	gap junction protein, beta 5	14622
ENSMUSG00000017211	18	10	5	5	0.1875	-0.312769	-0.353297	5.42201	5.32	1.375	0.5	No	1.36057	0.474576	0.868349	-1.41345	1.04347	1.89683	0.00127581	0.0105214	-0.36998	-2.45693	GC_LAR	Gsdma2	gasdermin A2	76758
ENSMUSG00000056293	18	18	10	8	0.10137	14.7938	14.504	14.8605	14.4426	31389.8	23926.4	No	32031.6	22809.2	26908.1	-0.48981	0.22323	4.85206	2.22045e-16	9.41863e-15	-0.26658	-0.713039	GC_LAR	Gsdmc2	gasdermin C2	331063
ENSMUSG00000062543	18	11	6	5	0.176471	0.154542	0.0920086	5.46327	5.3534	1.375	0.6	No	2.23588	0.657496	1.359	-1.58217	1.08409	2.28722	0.000102593	0.00109679	-0.498083	-2.66626	GC_LAR	Gsdmcl1	gasdermin C-like 1	74236
ENSMUSG00000067724	18	7	2	5	0.214286	-0.274593	-0.333338	5.43796	5.27333	1.25	0.4	No	1.93223	0.48115	1.12607	-2.03714	1.39863	1.8704	0.00149066	0.0120922	-0.638514	-3.43578	GC_LAR	Gbx1	gastrulation brain homeobox 1	231044
ENSMUSG00000015619	18	18	10	8	0.138313	5.27782	5.11695	6.67859	6.5166	46.375	35.2	No	44.3966	32.9164	38.0187	-0.43045	0.242928	3.1565	8.29181e-08	1.53784e-06	-0.187522	-0.673377	GC_LAR	Gata3	GATA binding protein 3	14462
ENSMUSG00000015627	18	18	10	8	0.101039	5.577	5.86824	6.68986	6.98615	47	68.3	No	43.9065	65.6827	56.0044	0.583062	0.234484	6.08762	2.22045e-16	9.41863e-15	0.817546	0.348578	FLT_LAR	Gata5	GATA binding protein 5	14464
ENSMUSG00000005836	18	18	10	8	0.082486	10.6017	10.6991	10.6419	10.7811	1584.5	1800.8	No	1533.4	1688.08	1619.34	0.144419	0.0668153	4.65043	2.88658e-15	1.13985e-13	0.211234	0.0776037	FLT_LAR	Gata6	GATA binding protein 6	14465
ENSMUSG00000037275	18	18	10	8	0.0935302	10.1675	10.3074	10.2175	10.415	1246.5	1434.1	No	1139.29	1315.48	1237.17	0.206074	0.148459	1.91736	0.00112902	0.0094742	0.354533	0.0576156	FLT_LAR	Gemin5	gem nuclear organelle associated protein 5	216766
ENSMUSG00000040621	18	18	10	8	0.0870627	7.04716	6.96785	7.65969	7.56772	142.375	131.9	No	135.468	123.417	128.773	-0.123629	0.090791	1.86622	0.00152758	0.012346	-0.0328377	-0.21442	GC_LAR	Gemin8	gem nuclear organelle associated protein 8	237221
ENSMUSG00000030206	18	17	10	7	0.15942	2.74138	2.649	5.80639	5.74817	9.75	6	No	7.92313	5.57075	6.61626	-0.599615	0.42823	2.09632	0.000370626	0.00350993	-0.171385	-1.02784	GC_LAR	Gsg1	germ cell associated 1	14840
ENSMUSG00000022659	18	18	10	8	0.168438	6.01296	5.8337	7.04794	6.86465	81.125	57.4	No	71.8268	55.994	63.0308	-0.378932	0.242811	2.45525	3.04949e-05	0.000368052	-0.136121	-0.621742	GC_LAR	Gcsam	germinal center associated, signaling and motility	14525
ENSMUSG00000018415	18	18	10	8	0.0855074	11.0757	11.1698	11.0979	11.2339	2335.62	2524.1	No	2131.61	2350.99	2253.48	0.139247	0.093597	2.20775	0.000177259	0.0018006	0.232844	0.0456498	FLT_LAR	Gid4	GID complex subunit 4, VID24 homolog	66771
ENSMUSG00000011877	18	18	10	8	0.0865818	11.1689	11.2557	11.1905	11.3155	2410.75	2665.9	No	2281.63	2489.98	2397.38	0.125749	0.0960676	1.70796	0.00372436	0.0267323	0.221817	0.0296816	FLT_LAR	Git1	GIT ArfGAP 1	216963
ENSMUSG00000090637	18	13	6	7	0.15625	0.913476	0.816598	5.57218	5.39006	2.5	1.2	No	3.57351	1.08272	2.18973	-1.41678	0.861573	2.91333	7.50986e-07	1.20435e-05	-0.555207	-2.27835	GC_LAR	Gm6189	GLE1 RNA export mediator pseudogene	620899
ENSMUSG00000056888	18	18	10	8	0.139693	9.57771	9.29379	9.77673	9.39009	970.875	654.3	No	846.069	613.196	716.695	-0.466471	0.200427	5.46239	2.22045e-16	9.41863e-15	-0.266044	-0.666898	GC_LAR	Glipr1	GLI pathogenesis-related 1 (glioma)	73690
ENSMUSG00000028480	18	18	10	8	0.118758	9.05313	8.82151	9.29347	8.98424	619.125	473.9	No	568.547	439.246	496.713	-0.372442	0.142124	6.91643	2.22045e-16	9.41863e-15	-0.230318	-0.514566	GC_LAR	Glipr2	GLI pathogenesis-related 2	384009
ENSMUSG00000060791	18	18	10	8	0.118926	9.50406	9.37517	9.67183	9.49618	812.5	702.1	No	773.107	661.465	711.084	-0.22295	0.179264	1.55283	0.00836051	0.0535622	-0.0436857	-0.402214	GC_LAR	Gmfg	glia maturation factor, gamma	63986
ENSMUSG00000021362	18	14	7	7	0.181818	0.968578	0.897269	5.56786	5.42773	2.5	1.3	No	2.99263	1.38322	2.09851	-1.06331	0.796388	1.84565	0.00172174	0.0136591	-0.266925	-1.8597	GC_LAR	Gcm2	glial cells missing homolog 2	107889
ENSMUSG00000025127	18	18	10	8	0.138122	3.23551	3.0965	5.97173	5.82895	12.375	8.2	No	11.5601	7.48534	9.29634	-0.644101	0.379546	2.92917	6.53854e-07	1.06081e-05	-0.264556	-1.02365	GC_LAR	Gcgr	glucagon receptor	14527
ENSMUSG00000046952	18	18	10	8	0.209302	2.6709	2.77558	5.7407	5.84907	5.375	8.6	No	5.56928	8.61447	7.26105	0.681919	0.508597	1.7661	0.00270551	0.0203176	1.19052	0.173322	FLT_LAR	Gm5815	glucocorticoid induced transcript 1 pseudogene	545216
ENSMUSG00000059434	18	17	10	7	0.425743	2.40813	2.16693	5.82095	5.59095	9.125	2.8	No	10.7714	2.99727	6.45246	-1.85375	0.73758	6.20186	2.22045e-16	9.41863e-15	-1.11617	-2.59133	GC_LAR	Gckr	glucokinase regulatory protein	231103
ENSMUSG00000034707	18	18	10	8	0.0866527	12.1647	12.269	12.1581	12.3104	5031.75	5461.9	No	4557.93	5059.66	4836.67	0.149856	0.12093	1.52979	0.00937602	0.0590752	0.270786	0.0289252	FLT_LAR	Gns	glucosamine (N-acetyl)-6-sulfatase	75612
ENSMUSG00000091387	18	18	10	8	0.0994475	7.08886	7.22565	7.63276	7.79265	141.875	176.1	No	133.049	159.219	147.588	0.263439	0.188531	1.94496	0.000956209	0.00817003	0.45197	0.0749079	FLT_LAR	Gcnt4	glucosaminyl (N-acetyl) transferase 4, core 2 (beta-1,6-N-acetylglucosaminyltransferase)	218476
ENSMUSG00000036197	18	18	10	8	0.0837877	10.8271	10.9147	10.8595	10.9862	1913.88	2081.6	No	1798.84	1968.56	1893.12	0.129746	0.099414	1.69745	0.00394193	0.0280641	0.22916	0.0303321	FLT_LAR	Gxylt1	glucoside xylosyltransferase 1	223827
ENSMUSG00000030074	18	18	10	8	0.103208	7.14404	6.96059	7.75278	7.54139	160.875	130	No	149.549	120.361	133.334	-0.317466	0.11682	7.44181	2.22045e-16	9.41863e-15	-0.200647	-0.434286	GC_LAR	Gxylt2	glucoside xylosyltransferase 2	232313
ENSMUSG00000030098	18	18	10	8	0.0808989	4.44307	4.60863	6.23008	6.39261	20.625	28	No	20.3918	26.9559	24.0385	0.4015	0.270674	2.17692	0.000218128	0.00217294	0.672174	0.130826	FLT_LAR	Grip2	glutamate receptor interacting protein 2	243547
ENSMUSG00000020524	18	18	10	8	0.124104	6.39325	6.55948	7.17518	7.35588	86.625	112	No	81.9097	101.611	92.8549	0.318657	0.216682	2.14735	0.000265489	0.00260041	0.535339	0.101975	FLT_LAR	Gria1	glutamate receptor, ionotropic, AMPA1 (alpha 1)	14799
ENSMUSG00000001986	18	18	10	8	0.0762268	8.46297	8.60484	8.69005	8.87499	360.875	418.4	No	349.726	401.21	378.329	0.198081	0.136394	2.09637	0.000370492	0.00350993	0.334474	0.061687	FLT_LAR	Gria3	glutamate receptor, ionotropic, AMPA3 (alpha 3)	53623
ENSMUSG00000025892	18	18	10	8	0.0955429	7.68963	7.84281	8.06408	8.25414	221	260.7	No	201.037	237.8	221.461	0.233062	0.119854	3.81043	9.72071e-11	2.5412e-09	0.352916	0.113208	FLT_LAR	Gria4	glutamate receptor, ionotropic, AMPA4 (alpha 4)	14802
ENSMUSG00000071424	18	18	10	8	0.132143	4.74301	4.86077	6.36163	6.47626	26.75	34.6	No	25.4658	31.488	28.8115	0.315435	0.243502	1.67907	0.00435065	0.0304789	0.558937	0.0719324	FLT_LAR	Grid2	glutamate receptor, ionotropic, delta 2	14804
ENSMUSG00000056073	18	18	10	8	0.0901549	6.48964	6.64229	7.23765	7.40367	89.375	109.3	No	87.5573	104.572	97.0101	0.263357	0.155411	2.8527	1.26787e-06	1.96371e-05	0.418768	0.107946	FLT_LAR	Grik2	glutamate receptor, ionotropic, kainate 2 (beta 2)	14806
ENSMUSG00000059003	18	8	3	5	0.37931	0.819235	0.707423	5.50356	5.33842	2.125	1.2	No	5.04482	1.06195	2.83212	-2.10008	1.45162	2.03861	0.000535869	0.00489164	-0.648463	-3.5517	GC_LAR	Grin2a	glutamate receptor, ionotropic, NMDA2A (epsilon 1)	14811
ENSMUSG00000019828	18	13	6	7	0.242424	0.906562	0.83616	5.54581	5.40198	2.375	1.4	No	3.14941	1.24771	2.09291	-1.13184	0.914838	1.57823	0.00735557	0.0479535	-0.217	-2.04668	GC_LAR	Grm1	glutamate receptor, metabotropic 1	14816
ENSMUSG00000000617	18	17	9	8	0.152174	1.49475	1.41248	5.64765	5.50882	3.125	2.1	No	4.54378	2.24621	3.26735	-0.817994	0.72542	1.5154	0.0100649	0.062532	-0.0925737	-1.54341	GC_LAR	Grm6	glutamate receptor, metabotropic 6	108072
ENSMUSG00000051978	18	18	10	8	0.0996799	8.47536	8.37794	8.76169	8.63514	385.625	347.6	No	365.731	328.464	345.027	-0.150291	0.0920117	2.68073	5.29689e-06	7.38499e-05	-0.0582792	-0.242303	GC_LAR	Erich1	glutamate rich 1	234086
ENSMUSG00000075302	18	18	10	8	0.0988372	3.19704	3.08468	5.96806	5.84431	11.375	8.1	No	10.6466	7.5227	8.91111	-0.499874	0.294909	2.88853	9.3154e-07	1.47404e-05	-0.204965	-0.794783	GC_LAR	Erich2	glutamate rich 2	66748
ENSMUSG00000074261	18	18	10	8	0.111707	5.73352	5.8643	6.80728	6.94596	56.625	66.6	No	51.0214	61.4393	56.8091	0.245505	0.171871	2.08764	0.00039199	0.00369496	0.417376	0.0736346	FLT_LAR	Erich4	glutamate rich 4	632778
ENSMUSG00000070471	18	12	7	5	0.24	0.691914	0.624633	5.48736	5.40899	1.625	1.2	No	3.31759	1.11348	2.09308	-1.26015	1.05176	1.58597	0.00707194	0.0462879	-0.208388	-2.31191	GC_LAR	Erich6	glutamate rich 6	545527
ENSMUSG00000026787	18	18	10	8	0.0968137	7.03685	6.9224	7.66251	7.53119	146.875	127.3	No	137.462	120.06	127.794	-0.196219	0.152063	1.6705	0.00455396	0.0316838	-0.044156	-0.348281	GC_LAR	Gad2	glutamic acid decarboxylase 2	14417
ENSMUSG00000039720	18	14	7	7	0.189189	0.944029	0.867902	5.57024	5.41558	2.875	1.4	No	2.90316	1.18246	1.94721	-1.17372	0.745614	2.53213	1.70571e-05	0.000217865	-0.42811	-1.91934	GC_LAR	Got1l1	glutamic-oxaloacetic transaminase 1-like 1	76615
ENSMUSG00000020363	18	18	10	8	0.102008	7.42317	7.63415	7.85031	8.10834	183.625	226.6	No	166.252	216.083	193.936	0.370128	0.210568	3.06414	1.95253e-07	3.42788e-06	0.580697	0.15956	FLT_LAR	Gfpt2	glutamine fructose-6-phosphate transaminase 2	14584
ENSMUSG00000030407	18	18	10	8	0.0823951	9.18763	9.30308	9.32434	9.48133	628	696.7	No	572.531	652.296	616.845	0.183903	0.120203	2.33467	7.34083e-05	0.000811843	0.304107	0.0637001	FLT_LAR	Qpctl	glutaminyl-peptide cyclotransferase-like	67369
ENSMUSG00000030871	18	18	10	8	0.0882037	9.12746	9.20591	9.28083	9.3872	584.625	647.9	No	552.178	601.907	579.805	0.12611	0.091214	1.90632	0.00120588	0.0100422	0.217324	0.0348957	FLT_LAR	Ears2	glutamyl-tRNA synthetase 2, mitochondrial	67417
ENSMUSG00000042808	18	18	10	8	0.125461	13.363	13.1585	13.4164	13.121	12772.4	10327.9	No	11607.8	9204.93	10272.9	-0.334521	0.229934	2.13013	0.000297363	0.00287407	-0.104586	-0.564455	GC_LAR	Gpx2	glutathione peroxidase 2	14776
ENSMUSG00000018339	18	18	10	8	0.0914864	10.4602	10.6843	10.4714	10.7907	1536.75	1872.7	No	1374.05	1734.95	1574.55	0.3346	0.155906	4.56225	9.32587e-15	3.50373e-13	0.490506	0.178695	FLT_LAR	Gpx3	glutathione peroxidase 3	14778
ENSMUSG00000004032	18	18	10	8	0.113664	10.5257	10.3935	10.6244	10.4409	1752	1462.1	No	1581.92	1332.45	1443.33	-0.247405	0.179967	1.89993	0.00125255	0.0103587	-0.0674385	-0.427372	GC_LAR	Gstm5	glutathione S-transferase, mu 5	14866
ENSMUSG00000033318	18	18	10	8	0.0989571	10.4085	10.2552	10.5231	10.3059	1515.25	1300	No	1405.26	1197.77	1289.99	-0.231146	0.0806539	8.26001	2.22045e-16	9.41863e-15	-0.150492	-0.3118	GC_LAR	Gstt2	glutathione S-transferase, theta 2	14872
ENSMUSG00000021033	18	18	10	8	0.105062	10.9494	10.8456	11.0272	10.8798	2228.12	1939.1	No	2036.21	1817.32	1914.61	-0.165513	0.096787	2.93627	6.14361e-07	1.00044e-05	-0.0687258	-0.2623	GC_LAR	Gstz1	glutathione transferase zeta 1 (maleylacetoacetate isomerase)	14874
ENSMUSG00000096171	18	6	1	5	0.272727	-0.694311	-0.774807	5.43806	5.2286	1.25	0.1	No	1.96032	0.0966122	0.924928	-2.97626	1.49349	4.67168	2.22045e-15	8.82107e-14	-1.48278	-4.46975	GC_LAR	Gm8055	glyceraldehyde-3-phosphate dehydrogenase pseudogene	666342
ENSMUSG00000098019	18	13	6	7	0.142857	0.131361	0.0853105	5.48568	5.35538	1.625	0.8	No	1.69879	0.689073	1.13784	-1.10982	0.855448	1.73388	0.00323329	0.0236978	-0.254367	-1.96526	GC_LAR	Gm2546	glyceraldehyde-3-phosphate dehydrogenase pseudogene	100040001
ENSMUSG00000083773	18	13	7	6	0.184211	1.09906	1.02661	5.56043	5.44383	2.75	1.6	No	3.46683	1.47525	2.3604	-1.00566	0.791137	1.74081	0.00311255	0.0229613	-0.214525	-1.7968	GC_LAR	Gm13394	glyceraldehyde-3-phosphate dehydrogenase pseudogene	100033452
ENSMUSG00000097943	18	17	9	8	0.210526	2.31093	2.22986	5.76789	5.65509	6.625	4.2	No	6.18683	4.12448	5.04108	-0.621272	0.480183	1.68166	0.00429086	0.0301242	-0.141089	-1.10146	GC_LAR	Gm7833	glyceraldehyde-3-phosphate dehydrogenase pseudogene	665865
ENSMUSG00000098037	18	18	10	8	0.128114	3.89509	3.72105	6.1755	5.9851	18.5	13.3	No	18.0828	11.966	14.6846	-0.527108	0.331434	2.55167	1.46769e-05	0.000190048	-0.195674	-0.858542	GC_LAR	Gm7765	glyceraldehyde-3-phosphate dehydrogenase pseudogene	665743
ENSMUSG00000083044	18	18	10	8	0.134454	2.50994	2.65348	5.66819	5.85054	4.625	8.2	No	4.23	7.84452	6.23807	0.852302	0.436124	3.83547	7.32978e-11	1.9354e-09	1.28843	0.416177	FLT_LAR	Gm12416	glyceraldehyde-3-phosphate dehydrogenase pseudogene	668010
ENSMUSG00000069376	18	15	10	5	0.142857	0.254101	0.291222	5.37949	5.49034	0.75	1.5	No	0.954734	1.588	1.30655	0.997285	0.849529	1.51535	0.0100674	0.0625325	1.84681	0.147756	FLT_LAR	Gm5507	glyceraldehyde-3-phosphate dehydrogenase pseudogene	433184
ENSMUSG00000078592	18	17	10	7	0.2	2.11882	2.25745	5.56894	5.76907	3.25	6.4	No	2.86448	6.66317	4.97486	1.09366	0.558144	3.8193	8.79736e-11	2.3067e-09	1.6518	0.535514	FLT_LAR	Gm4609	glyceraldehyde-3-phosphate dehydrogenase pseudogene	100043724
ENSMUSG00000052482	18	6	6	0	0.285714	-1.30822	-1.27876	5.20528	5.36303	0	0.7	SZ	0	0.753597	0.418665	1.94871	1.59144	2.38034	5.28802e-05	0.000607291	3.54015	0.357269	FLT_LAR	Gm8174	glyceraldehyde-3-phosphate dehydrogenase pseudogene	666579
ENSMUSG00000078967	18	18	10	8	0.134921	3.67984	3.53484	6.09879	5.94706	16.875	11.7	No	15.1032	10.6375	12.6223	-0.505162	0.341829	2.2184	0.000164892	0.00168998	-0.163333	-0.846992	GC_LAR	Gapdh-ps16	glyceraldehyde-3-phosphate dehydrogenase, pseudogene 16	100041325
ENSMUSG00000024978	18	18	10	8	0.0980682	11.8323	11.9888	11.8144	12.0429	4159.88	4721.6	No	3654.09	4263.14	3992.45	0.221747	0.183786	1.44676	0.0140095	0.0827018	0.405532	0.0379609	FLT_LAR	Gpam	glycerol-3-phosphate acyltransferase, mitochondrial	14732
ENSMUSG00000023019	18	18	10	8	0.126526	10.5106	10.2709	10.6372	10.2975	1831.5	1401.4	No	1595.22	1254.05	1405.69	-0.34779	0.235444	2.19742	0.000190067	0.00192355	-0.112345	-0.583234	GC_LAR	Gpd1	glycerol-3-phosphate dehydrogenase 1 (soluble)	14555
ENSMUSG00000019359	18	18	10	8	0.0961963	7.53906	7.77283	7.93412	8.21818	204.875	243.6	No	190.466	236.133	215.836	0.304559	0.255989	1.40434	0.0170802	0.0979702	0.560548	0.0485705	FLT_LAR	Gdpd2	glycerophosphodiester phosphodiesterase domain containing 2	71584
ENSMUSG00000035314	18	18	10	8	0.116471	7.72199	7.85164	8.09757	8.2584	214.625	263.6	No	207.035	252.359	232.215	0.286425	0.221038	1.66415	0.00471016	0.032641	0.507463	0.0653876	FLT_LAR	Gdpd5	glycerophosphodiester phosphodiesterase domain containing 5	233552
ENSMUSG00000027199	18	18	10	8	0.282686	9.99843	10.4457	9.97331	10.59	1101.12	2133.4	No	965.74	2119.46	1102.76	0.326706	0.200798	2.62342	8.3761e-06	0.000113191	0.527505	0.125908	FLT_LAR	Gatm	glycine amidinotransferase (L-arginine:glycine amidinotransferase)	67092
ENSMUSG00000006378	18	18	10	8	0.24271	8.8712	9.03023	9.03413	9.23988	549.875	767.3	No	483.89	754.093	634.003	0.639496	0.445086	2.01571	0.000618723	0.00555541	1.08458	0.19441	FLT_LAR	Gcat	glycine C-acetyltransferase (2-amino-3-ketobutyrate-coenzyme A ligase)	26912
ENSMUSG00000002769	18	18	10	8	0.731678	5.21113	5.35374	6.53826	6.48424	40.25	132.9	No	41.9165	155.85	26.2054	-1.62135	0.453822	12.6504	2.22045e-16	9.41863e-15	-1.16753	-2.07517	GC_LAR	Gnmt	glycine N-methyltransferase	14711
ENSMUSG00000063683	18	18	10	8	0.315789	2.24331	2.08754	5.78062	5.60779	7.75	3.3	No	7.5416	3.09689	5.07231	-1.29547	0.581706	5.02171	2.22045e-16	9.41863e-15	-0.713769	-1.87718	GC_LAR	Glyat	glycine-N-acyltransferase	107146
ENSMUSG00000030244	18	17	9	8	0.342742	3.56836	2.99397	6.21819	5.62675	25.125	4.7	No	22.009	4.08093	12.0489	-2.41752	0.5701	17.9467	2.22045e-16	9.41863e-15	-1.84742	-2.98762	GC_LAR	Gys2	glycogen synthase 2	232493
ENSMUSG00000019528	18	18	10	8	0.103708	10.5152	10.3925	10.6163	10.4406	1703.38	1460.6	No	1525.3	1331.26	1417.5	-0.197245	0.133933	2.18018	0.000213409	0.00213077	-0.0633115	-0.331178	GC_LAR	Gyg	glycogenin	27357
ENSMUSG00000046811	18	9	4	5	0.333333	-0.360793	-0.417875	5.42782	5.28847	1.375	0.4	No	1.56548	0.309084	0.867482	-1.88992	1.18148	2.82874	1.55503e-06	2.36939e-05	-0.708444	-3.0714	GC_LAR	Gltpd2	glycolipid transfer protein domain containing 2	216871
ENSMUSG00000051839	18	18	10	8	0.171429	2.80645	2.65741	5.89182	5.71772	10.5	5.6	No	9.18833	5.25057	7.00068	-0.826708	0.462569	3.24772	3.47644e-08	6.73742e-07	-0.364139	-1.28928	GC_LAR	Gypa	glycophorin A	14934
ENSMUSG00000050675	18	10	3	7	0.210526	0.237465	0.136112	5.53189	5.28412	1.875	0.4	No	2.63098	0.409978	1.39709	-2.50316	1.05435	5.7225	2.22045e-16	9.41863e-15	-1.44881	-3.55751	GC_LAR	Gp1ba	glycoprotein 1b, alpha polypeptide	14723
ENSMUSG00000031342	18	18	10	8	0.0833932	9.85756	10.0389	9.91665	10.1717	987.75	1159.6	No	909.943	1087.46	1008.56	0.253154	0.119574	4.45756	3.73035e-14	1.32933e-12	0.372727	0.13358	FLT_LAR	Gpm6b	glycoprotein m6b	14758
ENSMUSG00000031286	18	18	10	8	0.0843846	8.47254	8.62211	8.69633	8.89159	364.875	421.5	No	348.926	415.973	386.174	0.254317	0.169841	2.22299	0.000159818	0.0016431	0.424158	0.0844753	FLT_LAR	Glt28d2	glycosyltransferase 28 domain containing 2	320302
ENSMUSG00000075391	18	17	9	8	0.174757	2.3334	2.22864	5.78095	5.63103	7.125	4.6	No	6.6807	3.84677	5.10629	-0.713143	0.520166	1.91739	0.00112879	0.0094742	-0.192977	-1.23331	GC_LAR	Glo1-ps	glyoxalase 1, pseudogene	654354
ENSMUSG00000055653	18	18	10	8	0.105066	9.0239	9.21147	9.15817	9.41255	593.875	699.4	No	520.51	637.254	585.368	0.28907	0.220455	1.7073	0.00373766	0.0268131	0.509525	0.0686146	FLT_LAR	Gpc3	glypican 3	14734
ENSMUSG00000022112	18	13	7	6	0.16129	0.799854	0.737489	5.51944	5.41819	2.125	1.4	No	2.93949	1.19539	1.97055	-0.923495	0.832967	1.42345	0.0156306	0.0910253	-0.0905282	-1.75646	GC_LAR	Gpc5	glypican 5	103978
ENSMUSG00000086537	18	15	8	7	0.181818	1.43258	1.33709	5.62143	5.47806	3.25	1.8	No	4.58413	1.83731	3.05812	-1.17489	0.802575	2.21968	0.000163463	0.00167729	-0.372318	-1.97747	GC_LAR	Gnasas1	GNAS antisense RNA 1	56802
ENSMUSG00000027955	18	18	10	8	0.100411	10.3645	10.5196	10.3983	10.6204	1484.12	1660	No	1308.75	1514.78	1423.21	0.208068	0.138875	2.23531	0.000146928	0.00152428	0.346943	0.0691922	FLT_LAR	Gask1b	golgi associated kinase 1B	68659
ENSMUSG00000022561	18	18	10	8	0.0888854	10.2699	10.3704	10.3253	10.467	1336.75	1477.7	No	1218.56	1360.82	1297.6	0.157071	0.117074	1.79542	0.00229486	0.0176367	0.274145	0.0399971	FLT_LAR	Gpaa1	GPI anchor attachment protein 1	14731
ENSMUSG00000022579	18	18	10	8	0.10997	7.33505	7.23144	7.87053	7.74678	181.625	156.6	No	169.769	148.61	158.014	-0.191006	0.156179	1.50061	0.0108193	0.0664804	-0.0348268	-0.347185	GC_LAR	Gpihbp1	GPI-anchored HDL-binding protein 1	68453
ENSMUSG00000021886	18	18	10	8	0.108032	7.41369	7.26754	7.93593	7.76448	200.75	160.6	No	180.922	152.482	165.122	-0.257055	0.174146	2.19673	0.000190959	0.00193006	-0.0829085	-0.431201	GC_LAR	Gpr65	G-protein coupled receptor 65	14744
ENSMUSG00000068696	18	18	10	8	0.0949464	4.89052	5.09538	6.38417	6.59553	30.75	40.7	No	26.8328	37.9879	33.0301	0.45192	0.229103	3.9442	2.10707e-11	5.83918e-10	0.681023	0.222817	FLT_LAR	Gpr88	G-protein coupled receptor 88	64378
ENSMUSG00000020656	18	18	10	8	0.112994	5.94513	6.07443	6.92695	7.06665	61.75	74.5	No	59.6516	74.3635	67.8248	0.316781	0.244508	1.66226	0.00475764	0.0329007	0.561289	0.0722727	FLT_LAR	Grhl1	grainyhead like transcription factor 1	195733
ENSMUSG00000074259	18	18	10	8	0.0924698	7.13663	6.98712	7.74308	7.56738	155.875	131.6	No	151.38	124.111	136.231	-0.277828	0.17137	2.63832	7.44171e-06	0.000101351	-0.106459	-0.449198	GC_LAR	Gramd2	GRAM domain containing 2	546134
ENSMUSG00000023132	18	18	10	8	0.177033	3.45986	3.33021	6.03486	5.89434	13.75	9.9	No	14.2748	9.15092	11.4282	-0.591125	0.451034	1.73049	0.00329397	0.0240834	-0.140091	-1.04216	GC_LAR	Gzma	granzyme A	14938
ENSMUSG00000079186	18	18	10	8	0.170732	2.03599	1.89266	5.75661	5.56254	6.75	2.8	No	5.78943	2.65031	4.04548	-1.18585	0.532002	5.12222	2.22045e-16	9.41863e-15	-0.653851	-1.71785	GC_LAR	Gzmc	granzyme C	14940
ENSMUSG00000046006	18	18	10	8	0.0910405	5.23689	5.06793	6.66321	6.49369	42.625	35.1	No	41.9263	33.0431	36.9912	-0.320937	0.266461	1.45871	0.0132373	0.0789587	-0.0544763	-0.587398	GC_LAR	Gapt	Grb2-binding adaptor, transmembrane	238875
ENSMUSG00000004837	18	18	10	8	0.130493	7.90896	7.74993	8.31569	8.11932	281.75	225.2	No	256.471	211.617	231.552	-0.283583	0.166595	2.91971	7.1033e-07	1.14467e-05	-0.116988	-0.450178	GC_LAR	Grap	GRB2-related adaptor protein	71520
ENSMUSG00000042351	18	18	10	8	0.0963788	7.61963	7.50209	8.08419	7.94137	216.5	185.8	No	208.556	179.845	192.605	-0.213576	0.172568	1.53676	0.00905755	0.0573711	-0.0410087	-0.386144	GC_LAR	Grap2	GRB2-related adaptor protein 2	17444
ENSMUSG00000052957	18	18	10	8	0.0992445	10.0557	10.1686	10.1197	10.2788	1162.12	1294.1	No	1053.12	1188.12	1128.12	0.171088	0.133032	1.64954	0.00508805	0.0347651	0.304119	0.0380555	FLT_LAR	Gas1	growth arrest specific 1	14451
ENSMUSG00000040220	18	18	10	8	0.0857513	8.24018	8.3293	8.51683	8.63253	329.75	353.1	No	299.302	327.089	314.739	0.113255	0.0918189	1.57092	0.00763299	0.0495165	0.205074	0.021436	FLT_LAR	Gas8	growth arrest specific 8	104346
ENSMUSG00000072625	18	6	1	5	0.25	-1.2177	-1.25469	5.38796	5.22557	0.875	0.1	No	1.00316	0.0730573	0.486434	-1.98406	1.49636	2.6211	8.53158e-06	0.000115004	-0.487701	-3.48042	GC_LAR	Gdf2	growth differentiation factor 2	12165
ENSMUSG00000038259	18	18	10	8	0.143426	3.54192	3.70755	5.93058	6.09703	10.75	16.5	No	9.8315	15.9609	13.2367	0.679053	0.388441	3.02666	2.74509e-07	4.71542e-06	1.06749	0.290611	FLT_LAR	Gdf5	growth differentiation factor 5	14563
ENSMUSG00000037660	18	18	10	8	0.137037	3.62737	3.86572	5.93629	6.16476	9.375	19.5	No	10.7892	17.674	14.6141	0.864159	0.371153	5.23638	2.22045e-16	9.41863e-15	1.23531	0.493006	FLT_LAR	Gdf7	growth differentiation factor 7	238057
ENSMUSG00000026815	18	18	10	8	0.107296	4.62649	4.50388	6.39655	6.2753	28.625	23.7	No	27.1463	21.6646	24.101	-0.311199	0.23163	1.81539	0.00204883	0.0159603	-0.0795692	-0.542829	GC_LAR	Gfi1b	growth factor independent 1B	14582
ENSMUSG00000020176	18	18	10	8	0.0936829	10.0559	10.2282	10.1038	10.3461	1154.25	1357.7	No	1046.54	1266.23	1168.59	0.272841	0.168902	2.59056	1.08487e-05	0.000143805	0.441743	0.10394	FLT_LAR	Grb10	growth factor receptor bound protein 10	14783
ENSMUSG00000026888	18	18	10	8	0.0903049	8.67629	8.576	8.93286	8.80034	449	408.2	No	421.559	377.943	397.328	-0.157448	0.113078	1.94694	0.000944791	0.00808823	-0.0443704	-0.270526	GC_LAR	Grb14	growth factor receptor bound protein 14	50915
ENSMUSG00000040888	18	18	10	8	0.0961145	10.2494	10.3851	10.2951	10.4892	1336.88	1473.3	No	1216.17	1366.64	1299.77	0.167294	0.128541	1.68727	0.00416384	0.0293736	0.295834	0.0387529	FLT_LAR	Gfer	growth factor, augmenter of liver regeneration	11692
ENSMUSG00000046182	18	18	10	8	0.140927	4.55759	4.71416	6.27518	6.42586	23.25	33.2	No	21.494	29.3288	25.8467	0.456105	0.265658	2.96864	4.61594e-07	7.71248e-06	0.721763	0.190447	FLT_LAR	Gsg1l	GSG1-like	269994
ENSMUSG00000046814	18	18	10	8	0.104813	6.66878	6.52188	7.43882	7.26834	115.75	94.4	No	118.293	91.5915	103.459	-0.357156	0.290263	1.51946	0.00986596	0.0615137	-0.0668927	-0.647418	GC_LAR	Gchfr	GTP cyclohydrolase I feedback regulator	320415
ENSMUSG00000026867	18	18	10	8	0.0835616	12.2121	12.2804	12.2159	12.3154	4957.5	5305	No	4698.76	5038.32	4887.4	0.100824	0.0683276	2.17106	0.000226829	0.00224769	0.169152	0.0324967	FLT_LAR	Gapvd1	GTPase activating protein and VPS9 domains 1	66691
ENSMUSG00000047867	18	18	10	8	0.104144	9.8802	9.70441	10.0308	9.7868	1064.12	864.6	No	984.529	825.645	896.26	-0.256303	0.137587	3.48921	3.10969e-09	6.86089e-08	-0.118716	-0.393891	GC_LAR	Gimap6	GTPase, IMAP family member 6	231931
ENSMUSG00000043931	18	18	10	8	0.145428	6.80804	6.57303	7.54127	7.28406	137.375	95.7	No	125.276	94.5082	108.183	-0.418618	0.249619	2.83264	1.50439e-06	2.29755e-05	-0.168999	-0.668237	GC_LAR	Gimap7	GTPase, IMAP family member 7	231932
ENSMUSG00000051124	18	18	10	8	0.100995	8.29525	8.20831	8.60911	8.49702	348.75	314.1	No	322.462	293.388	306.31	-0.138244	0.109526	1.59911	0.00661245	0.0436498	-0.0287181	-0.24777	GC_LAR	Gimap9	GTPase, IMAP family member 9	317758
ENSMUSG00000058624	18	18	10	8	0.112354	12.2381	12.6	12.1539	12.6837	5204.25	7360	No	4745.07	6882.03	5932.27	0.536203	0.238144	4.97376	2.22045e-16	9.41863e-15	0.774346	0.298059	FLT_LAR	Gda	guanine deaminase	14544
ENSMUSG00000032766	18	18	10	8	0.115894	9.02267	8.90284	9.23848	9.07834	594.75	513.9	No	550.543	472.773	507.337	-0.217794	0.157456	1.92159	0.00110074	0.00926643	-0.0603376	-0.37525	GC_LAR	Gng11	guanine nucleotide binding protein (G protein), gamma 11	66066
ENSMUSG00000036402	18	18	10	8	0.0896899	13.2858	13.3979	13.2643	13.4303	10917.1	11853.9	No	9932.28	11014.3	10533.4	0.148932	0.112029	1.76013	0.00279701	0.0209033	0.260961	0.0369037	FLT_LAR	Gng12	guanine nucleotide binding protein (G protein), gamma 12	14701
ENSMUSG00000021303	18	18	10	8	0.0965661	7.86494	7.96087	8.21495	8.33568	250.875	279.8	No	230.126	256.162	244.59	0.150635	0.126797	1.42143	0.0157785	0.0917603	0.277432	0.0238374	FLT_LAR	Gng4	guanine nucleotide binding protein (G protein), gamma 4	14706
ENSMUSG00000024697	18	18	10	8	0.0949954	11.3162	11.5107	11.3028	11.5845	2762	3303.3	No	2506.94	3041.32	2803.82	0.278155	0.144737	3.66358	4.91371e-10	1.19543e-08	0.422892	0.133418	FLT_LAR	Gna14	guanine nucleotide binding protein, alpha 14	14675
ENSMUSG00000024639	18	18	10	8	0.0789839	11.4694	11.5311	11.4894	11.579	2972.25	3172.7	No	2819.12	2988.89	2913.44	0.0843802	0.0710722	1.40633	0.0169237	0.0972206	0.155452	0.0133081	FLT_LAR	Gnaq	guanine nucleotide binding protein, alpha q polypeptide	14682
ENSMUSG00000040264	18	18	10	8	0.114754	5.74275	5.5534	6.90651	6.71702	65.5	51.3	No	59.692	46.6637	52.454	-0.359031	0.272899	1.75132	0.00293703	0.0217948	-0.0861315	-0.63193	GC_LAR	Gbp2b	guanylate binding protein 2b	14468
ENSMUSG00000042638	18	18	10	8	0.0947837	13.4565	13.6194	13.4177	13.6575	12788	14586.1	No	11240.7	13196.9	12327.5	0.231273	0.179724	1.64462	0.00522132	0.0355648	0.410997	0.0515486	FLT_LAR	Gucy2c	guanylate cyclase 2c	14917
ENSMUSG00000020890	18	8	2	6	0.294118	-0.244881	-0.317823	5.45659	5.25217	1.875	0.2	No	1.58222	0.200901	0.814822	-2.6618	1.10429	6.25172	2.22045e-16	9.41863e-15	-1.55751	-3.76609	GC_LAR	Gucy2e	guanylate cyclase 2e	14919
ENSMUSG00000044927	18	18	10	8	0.134021	3.3008	3.18427	5.98842	5.85915	12.5	9.4	No	11.9612	8.23617	9.89172	-0.496028	0.3957	1.58825	0.00699028	0.0458219	-0.100328	-0.891728	GC_LAR	H1f10	H1.10 linker histone	243529
ENSMUSG00000091230	18	16	9	7	0.172414	1.50647	1.42753	5.61994	5.51873	4.5	2.2	No	3.68427	2.04163	2.77169	-0.962717	0.546318	3.30127	2.0643e-08	4.11592e-07	-0.4164	-1.50904	GC_LAR	H1f11-ps	H1.11 linker histone, pseudogene	629389
ENSMUSG00000036181	18	18	10	8	0.0975414	13.1323	12.9824	13.1809	12.9603	10148.4	8797.2	No	9326.46	8092.65	8641.01	-0.204804	0.148293	1.91596	0.00113848	0.00954442	-0.0565113	-0.353097	GC_LAR	H1f2	H1.2 linker histone, cluster member	50708
ENSMUSG00000036211	18	18	10	8	0.0927835	2.42516	2.31778	5.81029	5.67337	6.375	4.6	No	7.26687	4.1117	5.514	-0.599146	0.424558	2.18501	0.000206618	0.00207004	-0.174588	-1.0237	GC_LAR	H1f6	H1.6 linker histone, cluster member	107970
ENSMUSG00000000031	18	18	10	8	0.099345	5.39356	5.65592	6.60299	6.86822	40.875	58.9	No	38.5833	55.2392	47.8366	0.507581	0.195844	6.67678	2.22045e-16	9.41863e-15	0.703426	0.311737	FLT_LAR	H19	H19, imprinted maternally expressed transcript	14955
ENSMUSG00000100200	18	18	10	8	0.153846	2.76067	2.62323	5.87296	5.7291	8.125	5.2	No	9.72085	5.23653	7.22956	-0.818392	0.516746	2.56513	1.32255e-05	0.000172016	-0.301646	-1.33514	GC_LAR	H2al1m	H2A histone family member L1M	76383
ENSMUSG00000041126	18	18	10	8	0.106497	10.9211	10.777	11.0097	10.8043	2168.88	1872.5	No	2031.47	1725.87	1861.69	-0.234051	0.127048	3.40952	7.02316e-09	1.48594e-07	-0.107003	-0.361099	GC_LAR	H2az2	H2A.Z histone variant 2	77605
ENSMUSG00000037894	18	18	10	8	0.100186	12.2685	12.145	12.3177	12.1406	5599.5	4951.9	No	5175.13	4500.46	4800.31	-0.20122	0.151166	1.77962	0.00250855	0.0190287	-0.0500545	-0.352386	GC_LAR	H2az1	H2A.Z variant histone 1	51788
ENSMUSG00000069307	18	18	10	8	0.122128	8.90127	8.6132	9.17344	8.79345	581.75	444.3	No	536.993	411.846	467.467	-0.38327	0.296077	1.68771	0.00415401	0.0293357	-0.0871922	-0.679347	GC_LAR	H2bc23	H2B clustered histone 23	665596
ENSMUSG00000056895	18	18	10	8	0.133739	6.06804	5.83539	7.09576	6.85149	85.5	63.2	No	76.5003	55.5887	64.8827	-0.453742	0.264808	2.96903	4.60006e-07	7.69085e-06	-0.188934	-0.71855	GC_LAR	H2bc27	H2B clustered histone 27	78303
ENSMUSG00000018102	18	18	10	8	0.127458	12.0901	11.9122	12.1544	11.9009	5027.25	4149.5	No	4675.39	3782.18	4179.16	-0.305556	0.161854	3.58525	1.1376e-09	2.64292e-08	-0.143702	-0.46741	GC_LAR	H2bc4	H2B clustered histone 4	68024
ENSMUSG00000080712	18	18	10	8	0.117255	5.71629	5.53158	6.8921	6.70561	65.375	52.6	No	58.3182	46.2501	51.6137	-0.332687	0.282821	1.40346	0.0171498	0.0982835	-0.0498659	-0.615508	GC_LAR	H2bu1-ps	H2B.U histone 1, pseudogene	382522
ENSMUSG00000060639	18	18	10	8	0.102235	7.55211	7.38672	8.04836	7.84643	199.5	175.9	No	205.481	164.81	182.886	-0.298733	0.197422	2.30033	9.35889e-05	0.00100749	-0.101312	-0.496155	GC_LAR	H4c9	H4 clustered histone 9	319158
ENSMUSG00000040289	18	18	10	8	0.104478	6.76364	6.63233	7.48152	7.33753	123.875	108.6	No	113.142	98.2063	104.844	-0.207475	0.152733	1.88163	0.00139564	0.0113987	-0.0547417	-0.360208	GC_LAR	Hey1	hairy/enhancer-of-split related with YRPW motif 1	15213
ENSMUSG00000032744	18	18	10	8	0.0860979	7.50097	7.67638	7.9175	8.1309	188.625	228.9	No	174.957	213.889	196.586	0.285534	0.12985	4.81783	2.22045e-16	9.41863e-15	0.415384	0.155684	FLT_LAR	Heyl	hairy/enhancer-of-split related with YRPW motif-like	56198
ENSMUSG00000031722	18	18	10	8	0.24446	6.24637	5.49377	7.34314	6.58955	121.375	42.8	No	117.079	43.0831	75.9702	-1.44766	0.47567	9.22891	2.22045e-16	9.41863e-15	-0.971995	-1.92333	GC_LAR	Hp	haptoglobin	15439
ENSMUSG00000046607	18	15	9	6	0.175	1.23627	1.13943	5.57567	5.47543	3	1.6	No	4.45252	1.5546	2.84256	-1.25378	0.815102	2.57465	1.22823e-05	0.000160783	-0.438678	-2.06888	GC_LAR	Hrk	harakiri, BCL2 interacting protein (contains only BH3 domain)	12123
ENSMUSG00000002833	18	18	10	8	0.081368	10.1094	10.2078	10.1746	10.3132	1162.38	1283.5	No	1094.53	1212.7	1160.18	0.146219	0.118237	1.52406	0.00964499	0.0604225	0.264456	0.0279825	FLT_LAR	Hdgfl2	HDGF like 2	15193
ENSMUSG00000025104	18	18	10	8	0.0721988	9.75143	9.83552	9.8455	9.96229	907.875	980.1	No	850.253	932.647	896.028	0.130117	0.0927077	1.96455	0.000848791	0.00737442	0.222824	0.0374091	FLT_LAR	Hdgfl3	HDGF like 3	29877
ENSMUSG00000050244	18	18	10	8	0.094412	10.7769	10.9762	10.778	11.0641	1985	2349	No	1757.33	2151.77	1976.46	0.291162	0.210129	1.90373	0.0012246	0.010166	0.501291	0.0810335	FLT_LAR	Heatr1	HEAT repeat containing 1	217995
ENSMUSG00000031657	18	18	10	8	0.0973114	9.96087	10.1268	10.0173	10.2497	1086.75	1280.4	No	978.538	1171.48	1085.73	0.258078	0.153869	2.79496	2.06808e-06	3.10082e-05	0.411947	0.104209	FLT_LAR	Heatr3	HEAT repeat containing 3	234549
ENSMUSG00000078963	18	18	10	8	0.109038	7.05462	6.86556	7.70052	7.48339	153.125	118.7	No	149.928	117.431	131.874	-0.35182	0.271118	1.69077	0.00408634	0.0289355	-0.0807024	-0.622937	GC_LAR	Hsbp1l1	heat shock factor binding protein 1-like 1	66255
ENSMUSG00000025092	18	18	10	8	0.0802869	9.93173	10.1164	9.98258	10.2459	1024.25	1215.8	No	954.683	1162.95	1070.39	0.282639	0.146875	3.6738	4.39866e-10	1.0741e-08	0.429514	0.135764	FLT_LAR	Hspa12a	heat shock protein 12A	73442
ENSMUSG00000091971	18	18	10	8	0.113577	8.68166	8.85804	8.86483	9.0988	446.75	557.4	No	410.934	512.986	467.63	0.318498	0.254497	1.55235	0.00838033	0.0536599	0.572995	0.0640009	FLT_LAR	Hspa1a	heat shock protein 1A	193740
ENSMUSG00000038086	18	18	10	8	0.10143	6.33763	6.14666	7.23786	7.0321	91.75	73.5	No	88.1258	68.5136	77.2301	-0.354744	0.183585	3.74937	1.92108e-10	4.90035e-09	-0.17116	-0.538329	GC_LAR	Hspb2	heat shock protein 2	69253
ENSMUSG00000006221	18	18	10	8	0.0777074	9.49237	9.31499	9.67427	9.43163	774.125	675.3	No	764.448	630.657	690.12	-0.274322	0.164975	2.77731	2.39712e-06	3.55567e-05	-0.109346	-0.439297	GC_LAR	Hspb7	heat shock protein family, member 7 (cardiovascular)	29818
ENSMUSG00000036854	18	18	10	8	0.0838015	9.18817	9.04051	9.39251	9.19349	640.125	555.9	No	612.331	518.02	559.936	-0.240489	0.133463	3.26227	3.0196e-08	5.89113e-07	-0.107026	-0.373952	GC_LAR	Hspb6	heat shock protein, alpha-crystallin-related, B6	243912
ENSMUSG00000030451	18	18	10	8	0.08421	13.2041	13.3503	13.171	13.39	10098.1	11399	No	9457.24	10708.2	10152.2	0.179053	0.141617	1.59041	0.00691338	0.045397	0.32067	0.0374368	FLT_LAR	Herc2	HECT and RLD domain containing E3 ubiquitin protein ligase 2	15204
ENSMUSG00000038664	18	18	10	8	0.0818123	13.0526	13.1915	13.0228	13.2308	8964.88	10008.9	No	8515.45	9581.34	9107.61	0.170009	0.139397	1.48018	0.0119447	0.072398	0.309406	0.0306121	FLT_LAR	Herc1	HECT and RLD domain containing E3 ubiquitin protein ligase family member 1	235439
ENSMUSG00000029804	18	18	10	8	0.0826986	9.97851	10.1035	10.0457	10.2212	1047.12	1197.4	No	990.949	1122.02	1063.77	0.181799	0.074383	5.94322	2.22045e-16	9.41863e-15	0.256182	0.107416	FLT_LAR	Herc3	hect domain and RLD 3	73998
ENSMUSG00000035247	18	18	10	8	0.0919211	13.6656	13.7956	13.6358	13.8287	14216.2	15756.8	No	12942.5	14599.5	13863.1	0.173564	0.13201	1.72018	0.00348491	0.0252827	0.305574	0.0415536	FLT_LAR	Hectd1	HECT domain E3 ubiquitin protein ligase 1	207304
ENSMUSG00000087579	18	17	9	8	0.229299	3.07864	2.82258	5.98922	5.70502	13	5.3	No	12.7477	5.22096	8.56616	-1.2758	0.514769	6.15122	2.22045e-16	9.41863e-15	-0.761032	-1.79057	GC_LAR	Hectd2os	Hectd2, opposite strand	668215
ENSMUSG00000037375	18	18	10	8	0.0929141	7.6833	7.80911	8.06586	8.22248	221.25	249.2	No	201.733	230.632	217.788	0.178043	0.11228	2.54787	1.51133e-05	0.000195122	0.290323	0.0657632	FLT_LAR	Hhat	hedgehog acyltransferase	226861
ENSMUSG00000022831	18	18	10	8	0.116037	9.23621	9.08181	9.43428	9.22775	740.125	592	No	651.599	542.664	591.08	-0.266641	0.207376	1.66496	0.00468989	0.0325091	-0.0592646	-0.474018	GC_LAR	Hcls1	hematopoietic cell specific Lyn substrate 1	15163
ENSMUSG00000029919	18	18	10	8	0.0849395	9.37703	9.21002	9.56754	9.34038	734	611.3	No	688.733	578.753	627.633	-0.253791	0.0768081	10.9635	2.22045e-16	9.41863e-15	-0.176983	-0.330599	GC_LAR	Hpgds	hematopoietic prostaglandin D synthase	54486
ENSMUSG00000019853	18	18	10	8	0.109862	8.17953	8.06236	8.52309	8.37283	318.875	287.4	No	305.37	263.464	282.089	-0.202118	0.144532	1.96184	0.000862918	0.00747986	-0.0575866	-0.34665	GC_LAR	Hebp2	heme binding protein 2	56016
ENSMUSG00000028332	18	11	4	7	0.222222	0.481652	0.395907	5.53947	5.3247	2.375	0.8	No	2.5176	0.646704	1.47821	-1.71488	0.922918	3.61663	8.14421e-10	1.9175e-08	-0.791964	-2.6378	GC_LAR	Hemgn	hemogen	93966
ENSMUSG00000069919	18	18	10	8	0.127474	10.1249	9.69406	10.3212	9.71866	1377	869	No	1240.24	825.288	1009.71	-0.588682	0.234846	6.33646	2.22045e-16	9.41863e-15	-0.353836	-0.823529	GC_LAR	Hba-a1	hemoglobin alpha, adult chain 1	15122
ENSMUSG00000069917	18	18	10	8	0.111338	10.3773	9.85133	10.583	9.84291	1535.5	927.2	No	1495.67	912.618	1171.75	-0.712624	0.237024	9.10913	2.22045e-16	9.41863e-15	-0.4756	-0.949649	GC_LAR	Hba-a2	hemoglobin alpha, adult chain 2	110257
ENSMUSG00000052305	18	18	10	8	0.101877	11.6789	11.1701	11.8328	11.0936	3759.62	2337	No	3728.08	2361.47	2968.85	-0.65874	0.280222	5.57095	2.22045e-16	9.41863e-15	-0.378518	-0.938961	GC_LAR	Hbb-b1	hemoglobin, beta adult major chain	15129
ENSMUSG00000073940	18	18	10	8	0.103346	8.72078	8.32608	9.04445	8.53296	476.625	329.9	No	466.225	329.027	390.004	-0.502742	0.261996	3.70618	3.09023e-10	7.66698e-09	-0.240746	-0.764738	GC_LAR	Hbb-bt	hemoglobin, beta adult t chain	101488143
ENSMUSG00000038403	18	12	5	7	0.405405	0.801554	0.70065	5.53663	5.35436	3.25	1.1	No	3.17236	0.855055	1.88497	-1.79727	0.963534	3.62638	7.33685e-10	1.7383e-08	-0.833737	-2.7608	GC_LAR	Hjv	hemojuvelin BMP co-receptor	69585
ENSMUSG00000026874	18	18	10	8	0.264831	4.59116	4.20603	6.47127	6.10097	37.875	16.9	No	37.0142	16.0259	25.354	-1.21213	0.466313	6.78699	2.22045e-16	9.41863e-15	-0.745819	-1.67844	GC_LAR	Hc	hemolytic complement	15139
ENSMUSG00000030895	18	18	10	8	0.422535	5.32144	4.67209	6.86192	6.24372	78.625	22.3	No	82.4491	23.0572	49.4536	-1.845	0.58016	9.93587	2.22045e-16	9.41863e-15	-1.26484	-2.42516	GC_LAR	Hpx	hemopexin	15458
ENSMUSG00000046321	18	18	10	8	0.110849	4.29439	4.4753	6.17094	6.34546	18.5	27.6	No	17.5427	24.9034	21.632	0.531969	0.246091	4.68381	1.77636e-15	7.1214e-14	0.778061	0.285878	FLT_LAR	Hs3st2	heparan sulfate (glucosamine) 3-O-sulfotransferase 2	195646
ENSMUSG00000070407	18	18	10	8	0.0907062	8.94982	9.07175	9.11213	9.2754	533.375	604.1	No	486.228	576.286	536.26	0.242617	0.193631	1.5601	0.00806077	0.0518694	0.436248	0.0489854	FLT_LAR	Hs3st3b1	heparan sulfate (glucosamine) 3-O-sulfotransferase 3B1	54710
ENSMUSG00000040151	18	18	10	8	0.0868003	10.5448	10.6525	10.5847	10.7381	1603.38	1750.7	No	1471.83	1642.52	1566.66	0.155917	0.0874893	3.16633	7.55862e-08	1.40782e-06	0.243407	0.0684281	FLT_LAR	Hs2st1	heparan sulfate 2-O-sulfotransferase 1	23908
ENSMUSG00000045216	18	18	10	8	0.0853959	11.7306	11.8017	11.7419	11.8453	3604.38	3883.8	No	3371.19	3620.6	3509.75	0.102701	0.0828415	1.53317	0.00922065	0.0582358	0.185542	0.0198594	FLT_LAR	Hs6st1	heparan sulfate 6-O-sulfotransferase 1	50785
ENSMUSG00000053465	18	18	10	8	0.114754	1.63957	1.71393	5.55868	5.66386	2.375	4.2	No	2.40501	4.05064	3.31925	0.801901	0.535009	2.2645	0.000120171	0.00126618	1.33691	0.266892	FLT_LAR	Hs6st3	heparan sulfate 6-O-sulfotransferase 3	50787
ENSMUSG00000024486	18	18	10	8	0.185344	8.67078	8.89291	8.84598	9.13776	412.75	580	No	401.865	587.908	505.222	0.54873	0.338476	2.57673	1.20856e-05	0.000158524	0.887206	0.210253	FLT_LAR	Hbegf	heparin-binding EGF-like growth factor	15200
ENSMUSG00000040405	18	18	10	8	0.166667	3.07233	2.92775	5.94651	5.78909	11.25	6.6	No	10.7248	6.83073	8.56143	-0.694211	0.453582	2.34374	6.88122e-05	0.000765845	-0.240629	-1.14779	GC_LAR	Havcr1	hepatitis A virus cellular receptor 1	171283
ENSMUSG00000020399	18	18	10	8	0.108418	7.30217	7.11911	7.86415	7.65112	189.125	145.7	No	170.312	135.745	151.108	-0.338247	0.175493	3.75775	1.75067e-10	4.48305e-09	-0.162754	-0.513739	GC_LAR	Havcr2	hepatitis A virus cellular receptor 2	171285
ENSMUSG00000017688	18	18	10	8	0.094573	9.96761	9.83992	10.1004	9.92227	1121.38	978.7	No	1035.34	907.447	964.288	-0.190124	0.117383	2.63433	7.68176e-06	0.000104458	-0.0727413	-0.307508	GC_LAR	Hnf4g	hepatocyte nuclear factor 4, gamma	30942
ENSMUSG00000050440	18	18	10	8	0.270408	4.35109	4.08656	6.35196	6.09503	29.625	15.5	No	30.1964	15.2445	21.8898	-0.988031	0.450824	4.81753	2.22045e-16	9.41863e-15	-0.537207	-1.43886	GC_LAR	Hamp	hepcidin antimicrobial peptide	84506
ENSMUSG00000031936	18	12	4	8	0.614754	2.28218	1.84921	5.8936	5.35813	13.75	1.2	No	13.019	1.13923	6.41911	-3.50792	0.941579	13.3181	2.22045e-16	9.41863e-15	-2.56634	-4.4495	GC_LAR	Hephl1	hephaestin-like 1	244698
ENSMUSG00000048001	18	16	9	7	0.179104	1.7239	1.6485	5.64375	5.55563	5	2.7	No	4.11034	2.52509	3.22965	-0.824257	0.506804	2.80523	1.89698e-06	2.86716e-05	-0.317453	-1.33106	GC_LAR	Hes5	hes family bHLH transcription factor 5	15208
ENSMUSG00000082233	18	11	4	7	0.34375	1.11724	0.965099	5.60312	5.36516	2.75	1	No	5.73568	1.19674	3.21405	-2.19291	1.13883	3.57907	1.21454e-09	2.80926e-08	-1.05409	-3.33174	GC_LAR	Gm6506	heterogeneous nuclear ribonucleoprotein A3 pseudogene	102639912
ENSMUSG00000083993	18	14	6	8	0.148148	0.685184	0.613201	5.55517	5.38056	2	1.1	No	2.75038	1.0174	1.78761	-1.14715	0.83914	2.06047	0.000466502	0.00431687	-0.308015	-1.98629	GC_LAR	Gm14398	heterogeneous nuclear ribonucleoprotein A3 pseudogene	108168827
ENSMUSG00000081953	18	15	8	7	0.21118	2.89867	2.72671	5.86206	5.68655	13.125	5.6	No	10.1622	5.69092	7.67814	-0.904443	0.645087	2.01229	0.000632075	0.00565598	-0.259357	-1.54953	GC_LAR	Gm12435	heterogeneous nuclear ribonucleoprotein F pseudogene	100417846
ENSMUSG00000066037	18	18	10	8	0.0695854	11.9818	12.0847	11.98	12.1282	4126.88	4619.7	No	3991.31	4475.73	4260.43	0.165328	0.121375	1.84624	0.00171585	0.0136248	0.286704	0.0439529	FLT_LAR	Hnrnpr	heterogeneous nuclear ribonucleoprotein R	74326
ENSMUSG00000039630	18	18	10	8	0.0775502	13.6823	13.7793	13.6631	13.8068	13919.5	15102.9	No	13046.4	14269.1	13725.7	0.128933	0.0868734	2.19499	0.000193204	0.00195051	0.215807	0.04206	FLT_LAR	Hnrnpu	heterogeneous nuclear ribonucleoprotein U	51810
ENSMUSG00000037012	18	18	10	8	0.0926983	12.9011	13.0157	12.8832	13.0488	8288.25	9409.6	No	7555.89	8599.11	8135.46	0.18633	0.142404	1.7031	0.0038235	0.0273543	0.328734	0.0439255	FLT_LAR	Hk1	hexokinase 1	15275
ENSMUSG00000020080	18	18	10	8	0.0885041	9.38691	9.83438	9.41459	10.0327	663.5	1034.1	No	617.486	1002.8	831.549	0.696883	0.158976	18.7415	2.22045e-16	9.41863e-15	0.855859	0.537907	FLT_LAR	Hkdc1	hexokinase domain containing 1	216019
ENSMUSG00000043410	18	13	6	7	0.208333	0.623721	0.532598	5.53644	5.37274	2	0.8	No	3.184	0.861333	1.89363	-1.66232	0.947172	3.38598	8.9042e-09	1.86442e-07	-0.715148	-2.60949	GC_LAR	Hfm1	HFM1, ATP-dependent DNA helicase homolog	330149
ENSMUSG00000022554	18	18	10	8	0.0984794	7.55629	7.71457	7.96117	8.15716	211.375	245.2	No	186.086	222.043	206.062	0.245068	0.191409	1.642	0.00529367	0.0360109	0.436476	0.0536588	FLT_LAR	Hgh1	HGH1 homolog	59053
ENSMUSG00000020928	18	18	10	8	0.0963855	3.77566	3.6707	6.115	6.0063	15.625	12.4	No	15.5138	11.8998	13.506	-0.357079	0.272033	1.76246	0.00276087	0.0206802	-0.085046	-0.629111	GC_LAR	Higd1b	HIG1 domain family, member 1B	75689
ENSMUSG00000093550	18	9	3	6	0.206897	0.634277	0.544693	5.52221	5.31972	2.75	0.7	No	2.54143	0.823922	1.58726	-1.79992	1.08194	2.76016	2.76491e-06	4.06452e-05	-0.717974	-2.88186	GC_LAR	Higd1c	HIG1 domain family, member 1C	380975
ENSMUSG00000002996	18	18	10	8	0.110003	11.866	11.7676	11.9182	11.7744	4259.75	3771.1	No	3871.58	3468.95	3647.9	-0.158767	0.134338	1.40214	0.0172542	0.0987955	-0.0244293	-0.293105	GC_LAR	Hbp1	high mobility group box transcription factor 1	73389
ENSMUSG00000066456	18	18	10	8	0.0868671	7.72411	7.60778	8.16156	8.01924	229.25	205.7	No	217.563	192.762	203.784	-0.169264	0.104867	2.61266	9.11955e-06	0.00012249	-0.0643976	-0.274131	GC_LAR	Hmgn3	high mobility group nucleosomal binding domain 3	94353
ENSMUSG00000082674	18	18	10	8	0.145833	3.63944	3.48374	6.10005	5.92339	15.75	11.4	No	15.0896	9.97648	12.249	-0.529874	0.333844	2.54378	1.55967e-05	0.000200674	-0.19603	-0.863717	GC_LAR	Gm11914	high-mobility group nucleosome binding domain 5 pseudogene	100040691
ENSMUSG00000034987	18	18	10	8	0.1	5.32541	5.18119	6.69928	6.55314	43.625	36.1	No	45.1672	35.76	39.941	-0.312234	0.25892	1.49146	0.0113112	0.0690152	-0.0533141	-0.571155	GC_LAR	Hrh2	histamine receptor H2	15466
ENSMUSG00000027360	18	18	10	8	0.0914634	4.77819	4.63775	6.46425	6.32414	30.375	24.9	No	30.6634	24.1061	27.0205	-0.322487	0.254287	1.63997	0.00535022	0.0363111	-0.0681996	-0.576774	GC_LAR	Hdc	histidine decarboxylase	15186
ENSMUSG00000022877	18	18	10	8	0.184807	5.54873	5.32261	6.83692	6.60923	60.25	40	No	62.27	41.9862	51.0012	-0.574863	0.446919	1.66207	0.00476251	0.0329256	-0.127945	-1.02178	GC_LAR	Hrg	histidine-rich glycoprotein	94175
ENSMUSG00000036594	18	18	10	8	0.129767	12.9896	12.7843	13.0485	12.7531	9964.38	7509.3	No	8835.99	6960.31	7793.95	-0.344455	0.188263	3.36974	1.04783e-08	2.16812e-07	-0.156192	-0.532718	GC_LAR	H2-Aa	histocompatibility 2, class II antigen A, alpha	14960
ENSMUSG00000073421	18	18	10	8	0.141177	12.4343	12.2572	12.4915	12.2376	6887.25	5324.1	No	6040.53	4879.45	5395.49	-0.308236	0.207596	2.21827	0.000165046	0.0016909	-0.10064	-0.515831	GC_LAR	H2-Ab1	histocompatibility 2, class II antigen A, beta 1	14961
ENSMUSG00000060586	18	18	10	8	0.125703	12.4602	12.257	12.5233	12.2326	7011.75	5259.9	No	6160.37	4842.56	5428.25	-0.34758	0.199758	3.04796	2.26305e-07	3.93364e-06	-0.147822	-0.547338	GC_LAR	H2-Eb1	histocompatibility 2, class II antigen E beta	14969
ENSMUSG00000037649	18	18	10	8	0.129883	9.40618	9.19206	9.60415	9.314	805.625	615.1	No	728.231	573.184	642.094	-0.347849	0.163935	4.53635	1.31006e-14	4.83217e-13	-0.183915	-0.511784	GC_LAR	H2-DMa	histocompatibility 2, class II, locus DMa	14998
ENSMUSG00000079547	18	18	10	8	0.12224	9.08794	8.94514	9.30153	9.11043	633.875	530.2	No	572.708	489.222	526.327	-0.229294	0.158133	2.11553	0.000327154	0.00313208	-0.0711608	-0.387427	GC_LAR	H2-DMb1	histocompatibility 2, class II, locus Mb1	14999
ENSMUSG00000037548	18	18	10	8	0.152848	9.08791	8.91612	9.30818	9.07915	654.625	508.7	No	605.87	487.108	539.891	-0.315728	0.245698	1.66145	0.00477799	0.033024	-0.0700302	-0.561426	GC_LAR	H2-DMb2	histocompatibility 2, class II, locus Mb2	15000
ENSMUSG00000016206	18	18	10	8	0.105333	8.74764	8.67247	8.98655	8.8882	492	437.1	No	442.627	404.362	421.368	-0.137366	0.112626	1.50404	0.01064	0.0655164	-0.0247397	-0.249991	GC_LAR	H2-M3	histocompatibility 2, M region locus 3	14991
ENSMUSG00000024459	18	16	8	8	0.134615	1.48596	1.40175	5.65613	5.48742	3.875	2.1	No	3.86355	2.02232	2.84064	-0.939253	0.613097	2.36051	6.10168e-05	0.000688409	-0.326157	-1.55235	GC_LAR	H2-M5	histocompatibility 2, M region locus 5	240095
ENSMUSG00000024334	18	18	10	8	0.149658	7.38242	7.15315	7.93666	7.66845	201.375	145.6	No	184.335	139.909	159.654	-0.404192	0.218892	3.43529	5.40729e-09	1.15615e-07	-0.1853	-0.623084	GC_LAR	H2-Oa	histocompatibility 2, O region alpha locus	15001
ENSMUSG00000067235	18	18	10	8	0.119129	7.17848	6.71996	7.85508	7.3287	168.5	99.4	No	175.264	96.5218	131.518	-0.849131	0.226955	14.0292	2.22045e-16	9.41863e-15	-0.622176	-1.07609	GC_LAR	H2-Q10	histocompatibility 2, Q region locus 10	15007
ENSMUSG00000056116	18	18	10	8	0.094678	11.2102	11.1263	11.2755	11.1543	2585.5	2352.9	No	2419.89	2219.82	2308.74	-0.125124	0.0922531	1.84485	0.00172977	0.0137146	-0.0328712	-0.217378	GC_LAR	H2-T22	histocompatibility 2, T region locus 22	15039
ENSMUSG00000073405	18	18	10	8	0.0926493	6.16068	5.9952	7.12387	6.95228	82.5	64.6	No	75.9326	61.8419	68.1045	-0.324139	0.14581	4.96551	2.22045e-16	9.41863e-15	-0.178329	-0.46995	GC_LAR	H2-T-ps	histocompatibility 2, T region locus, pseudogene	667803
ENSMUSG00000091618	18	18	10	8	0.186139	4.67787	4.47214	6.44595	6.23935	34	23.3	No	31.2405	20.3488	25.1896	-0.58944	0.310501	3.64762	5.8387e-10	1.39847e-08	-0.278939	-0.899941	GC_LAR	H60c	histocompatibility 60c	670558
ENSMUSG00000028800	18	18	10	8	0.0952334	11.0994	10.9448	11.1842	10.9636	2440.75	2121.6	No	2298.08	1945.56	2102.24	-0.239068	0.134781	3.16116	7.93587e-08	1.47495e-06	-0.104287	-0.373849	GC_LAR	Hdac1	histone deacetylase 1	433759
ENSMUSG00000067873	18	18	10	8	0.08419	10.618	10.7492	10.6465	10.8358	1736	1899	No	1556.78	1759.62	1669.47	0.172871	0.107923	2.55935	1.38313e-05	0.000179452	0.280794	0.0649485	FLT_LAR	Htatsf1	HIV TAT specific factor 1	72459
ENSMUSG00000039745	18	18	10	8	0.0949681	9.39666	9.30661	9.56593	9.44253	741.875	676.4	No	692.34	627.267	656.189	-0.140283	0.102198	1.8898	0.00132998	0.010927	-0.0380852	-0.242481	GC_LAR	Htatip2	HIV-1 Tat interactive protein 2	53415
ENSMUSG00000029556	18	18	10	8	0.0892779	9.78921	9.92485	9.86643	10.0552	925.375	1082.1	No	869.62	1005.66	945.199	0.20861	0.126669	2.69839	4.59107e-06	6.49507e-05	0.335279	0.0819411	FLT_LAR	Hnf1a	HNF1 homeobox A	21405
ENSMUSG00000075588	18	18	10	8	0.0952381	5.70611	5.84766	6.79813	6.93861	51.75	65.7	No	50.5309	60.4307	56.0308	0.307431	0.152099	4.07439	4.53193e-12	1.33317e-10	0.45953	0.155332	FLT_LAR	Hoxb2	homeobox B2	103889
ENSMUSG00000038692	18	18	10	8	0.0825688	6.01097	6.17788	6.9544	7.12752	64.875	78.9	No	63.7869	76.6545	70.9355	0.259622	0.211067	1.50133	0.0107816	0.0663106	0.470689	0.0485543	FLT_LAR	Hoxb4	homeobox B4	15412
ENSMUSG00000000690	18	18	10	8	0.0820225	5.7105	5.49927	6.90653	6.68634	55.625	44.5	No	61.069	43.1903	51.1364	-0.447622	0.240036	3.54978	1.65429e-09	3.75378e-08	-0.207586	-0.687659	GC_LAR	Hoxb6	homeobox B6	15414
ENSMUSG00000038721	18	18	10	8	0.10479	5.10287	4.96894	6.58958	6.45785	41.625	33.5	No	37.7008	30.1955	33.5312	-0.318997	0.230082	1.95561	0.000896314	0.00772857	-0.0889153	-0.54908	GC_LAR	Hoxb7	homeobox B7	15415
ENSMUSG00000056648	18	17	9	8	0.102362	2.8949	2.72103	5.92897	5.7147	8.75	5.7	No	11.0994	5.33502	7.89699	-0.89751	0.48406	3.5879	1.10603e-09	2.57412e-08	-0.41345	-1.38157	GC_LAR	Hoxb8	homeobox B8	15416
ENSMUSG00000001661	18	15	8	7	0.145833	1.52305	1.43821	5.6327	5.50606	3.375	2.1	No	4.38559	2.17467	3.1573	-0.895932	0.725697	1.62286	0.00584955	0.0392743	-0.170235	-1.62163	GC_LAR	Hoxc6	homeobox C6	15425
ENSMUSG00000001657	18	11	6	5	0.266667	1.4561	1.33824	5.5718	5.44395	3.125	2	No	6.4269	1.93712	3.93258	-1.60685	1.1685	1.86304	0.00155628	0.0125394	-0.438348	-2.77534	GC_LAR	Hoxc8	homeobox C8	15426
ENSMUSG00000040726	18	16	9	7	0.3	1.69292	1.84018	5.48524	5.66699	2	6.4	No	1.84579	5.74726	4.01327	1.59882	0.791284	3.99439	1.17182e-11	3.31373e-10	2.3901	0.807534	FLT_LAR	Hesx1	homeobox gene expressed in ES cells	15209
ENSMUSG00000008730	18	18	10	8	0.080156	13.3648	13.4462	13.3521	13.4723	11112.1	11958.4	No	10473	11319.7	10943.4	0.11192	0.0850795	1.72525	0.00338983	0.0247172	0.197	0.026841	FLT_LAR	Hipk1	homeodomain interacting protein kinase 1	15257
ENSMUSG00000027177	18	18	10	8	0.083799	12.9404	13.0138	12.9338	13.0414	8360	8918.4	No	7780.39	8393.21	8120.85	0.108922	0.0766109	2.01577	0.000618519	0.00555541	0.185533	0.0323115	FLT_LAR	Hipk3	homeodomain interacting protein kinase 3	15259
ENSMUSG00000007617	18	18	10	8	0.0820851	10.1015	10.1941	10.1684	10.3	1139.62	1258	No	1088.5	1197.33	1148.96	0.139906	0.107414	1.6889	0.00412752	0.0291722	0.247321	0.0324921	FLT_LAR	Homer1	homer scaffolding protein 1	26556
ENSMUSG00000025813	18	18	10	8	0.114319	10.4393	10.6119	10.4653	10.7059	1460.38	1810.2	No	1379.5	1740.5	1580.06	0.335717	0.248269	1.80875	0.00212786	0.0165124	0.583986	0.0874481	FLT_LAR	Homer2	homer scaffolding protein 2	26557
ENSMUSG00000022821	18	17	10	7	0.356436	3.32736	2.96902	6.05639	5.72841	18	5.8	No	19.0924	5.43863	11.507	-1.79756	0.634787	7.96145	2.22045e-16	9.41863e-15	-1.16277	-2.43235	GC_LAR	Hgd	homogentisate 1, 2-dioxygenase	15233
ENSMUSG00000059325	18	18	10	8	0.105573	10.19	10.0727	10.3059	10.1411	1336.25	1190.1	No	1209.65	1073.77	1134.16	-0.172291	0.137551	1.57643	0.00742299	0.0483211	-0.0347407	-0.309842	GC_LAR	Hopx	HOP homeobox	74318
ENSMUSG00000028109	18	6	5	1	0.333333	-1.04085	-1.01407	5.23519	5.34722	0.125	0.8	No	0.1271	0.736375	0.465586	1.61409	1.57534	1.44839	0.0139019	0.0822143	3.18944	0.0387508	FLT_LAR	Hormad1	HORMA domain containing 1	67981
ENSMUSG00000031386	18	18	10	8	0.0891246	12.2263	12.3515	12.212	12.3963	5136.12	5830	No	4782.19	5367.6	5107.41	0.166374	0.136564	1.47745	0.0121024	0.0732019	0.302938	0.0298107	FLT_LAR	Hcfc1	host cell factor C1	15161
ENSMUSG00000042328	18	18	10	8	0.0817655	9.81158	9.70846	9.94942	9.80602	974	895.1	No	920.41	830.169	870.276	-0.148422	0.0994067	2.23672	0.000145515	0.00151082	-0.0490154	-0.247829	GC_LAR	Hps4	HPS4, biogenesis of lysosomal organelles complex 3 subunit 2	192232
ENSMUSG00000029104	18	18	10	8	0.0739509	12.1399	12.2897	12.1197	12.3407	4615.25	5361.1	No	4491.71	5149.29	4857.03	0.197275	0.135721	2.1003	0.000361186	0.00342547	0.332996	0.0615547	FLT_LAR	Htt	huntingtin	15194
ENSMUSG00000000915	18	18	10	8	0.0827491	11.3814	11.4738	11.3955	11.5292	2757.5	3085.9	No	2634.35	2895.26	2779.3	0.136708	0.0832788	2.68446	5.13983e-06	7.20151e-05	0.219987	0.053429	FLT_LAR	Hip1r	huntingtin interacting protein 1 related	29816
ENSMUSG00000020330	18	18	10	8	0.126191	9.29757	9.05689	9.51133	9.186	800.25	629.3	No	711.26	549.866	621.597	-0.370958	0.285351	1.70242	0.00383759	0.0274347	-0.0856078	-0.656309	GC_LAR	Hmmr	hyaluronan mediated motility receptor (RHAMM)	15366
ENSMUSG00000086541	18	18	10	8	0.103779	6.48971	6.29052	7.3325	7.11489	106.125	81.8	No	99.6474	76.1157	86.5742	-0.388584	0.218831	3.17329	7.07793e-08	1.32769e-06	-0.169753	-0.607415	GC_LAR	Has2os	hyaluronan synthase 2, opposite strand	594843
ENSMUSG00000025075	18	15	7	8	0.792244	3.16043	3.18494	5.74299	5.80808	6.125	31.2	No	7.42473	36.4737	4.73918	-1.46652	0.867444	2.84304	1.37695e-06	2.11028e-05	-0.599072	-2.33396	GC_LAR	Habp2	hyaluronic acid binding protein 2	226243
ENSMUSG00000010051	18	18	10	8	0.0850571	8.17561	8.33829	8.44497	8.65491	308.375	357.6	No	284.859	333.684	311.984	0.217277	0.125347	3.007	3.27714e-07	5.57475e-06	0.342623	0.09193	FLT_LAR	Hyal1	hyaluronoglucosaminidase 1	15586
ENSMUSG00000059854	18	18	10	8	0.105769	4.10471	3.96496	6.22827	6.08434	19.625	15.5	No	21.1218	14.7492	17.5814	-0.441883	0.338431	1.78036	0.00249806	0.0189655	-0.103452	-0.780314	GC_LAR	Hydin	HYDIN, axonemal central pair apparatus protein	244653
ENSMUSG00000049241	18	18	10	8	0.095691	7.92516	8.04641	8.25405	8.40875	268.375	300.5	No	239.601	273.531	258.451	0.179049	0.137332	1.72088	0.00347171	0.0252008	0.316381	0.0417176	FLT_LAR	Hcar1	hydrocarboxylic acid receptor 1	243270
ENSMUSG00000027261	18	16	8	8	0.308824	1.82318	1.66182	5.71463	5.49361	5.75	2.2	No	6.25115	2.01489	3.89767	-1.5974	0.746777	4.6033	5.32907e-15	2.04897e-13	-0.850622	-2.34418	GC_LAR	Hao1	hydroxyacid oxidase 1, liver	15112
ENSMUSG00000027870	18	18	10	8	0.105119	13.7312	14.0302	13.646	14.095	15826.6	19613.7	No	13738.8	17763.8	15974.9	0.370539	0.212897	2.99288	3.71932e-07	6.26613e-06	0.583436	0.157642	FLT_LAR	Hao2	hydroxyacid oxidase 2	56185
ENSMUSG00000027871	18	14	10	4	0.228571	0.717913	0.788026	5.36117	5.55165	1.125	2.6	No	0.876083	2.4125	1.72965	1.2554	0.77241	2.8003	1.97732e-06	2.98174e-05	2.02781	0.482995	FLT_LAR	Hsd3b1	hydroxy-delta-5-steroid dehydrogenase, 3 beta- and steroid delta-isomerase 1	15492
ENSMUSG00000063730	18	18	10	8	0.0950975	9.11226	8.95995	9.326	9.12171	616.625	522.5	No	591.343	493.719	537.107	-0.257578	0.17739	2.11721	0.000323583	0.00310128	-0.0801881	-0.434969	GC_LAR	Hsd3b2	hydroxy-delta-5-steroid dehydrogenase, 3 beta- and steroid delta-isomerase 2	15493
ENSMUSG00000062410	18	18	10	8	0.0918896	12.1583	12.0161	12.2134	12.0093	5136.62	4318.2	No	4813.78	4122.25	4429.6	-0.223716	0.161223	1.93443	0.00101898	0.00863622	-0.0624928	-0.38494	GC_LAR	Hsd3b3	hydroxy-delta-5-steroid dehydrogenase, 3 beta- and steroid delta-isomerase 3	15494
ENSMUSG00000034528	18	18	10	8	0.364723	7.47927	7.99901	7.81161	8.46002	201.375	458	No	171.691	474.569	201.561	0.388562	0.312221	1.53431	0.0091684	0.0579476	0.700783	0.0763414	FLT_LAR	Hsd17b13	hydroxysteroid (17-beta) dehydrogenase 13	243168
ENSMUSG00000025396	18	13	7	6	0.181818	1.46451	1.36669	5.59955	5.46467	4.5	1.9	No	3.93467	1.88785	2.79755	-1.15225	0.758215	2.34942	6.60742e-05	0.000739126	-0.394031	-1.91046	GC_LAR	Hsd17b6	hydroxysteroid (17-beta) dehydrogenase 6	27400
ENSMUSG00000031891	18	18	10	8	0.0958536	12.6641	12.9183	12.6101	12.9811	6757.75	8813.4	No	6275.42	8190.07	7339.11	0.384117	0.148619	6.59656	2.22045e-16	9.41863e-15	0.532736	0.235498	FLT_LAR	Hsd11b2	hydroxysteroid 11-beta dehydrogenase 2	15484
ENSMUSG00000028383	18	18	10	8	0.0966133	10.3216	10.4614	10.3621	10.5614	1430.12	1601.9	No	1270.3	1457.33	1374.21	0.195785	0.142525	1.87968	0.0014117	0.0115085	0.33831	0.0532597	FLT_LAR	Hsdl2	hydroxysteroid dehydrogenase like 2	72479
ENSMUSG00000050555	18	18	10	8	0.0817884	8.2438	8.10289	8.58041	8.4012	329.5	286.6	No	314.453	271.287	290.472	-0.211121	0.118775	3.16954	7.33349e-08	1.36977e-06	-0.0923455	-0.329896	GC_LAR	Hyls1	HYLS1, centriolar and ciliogenesis associated	76832
ENSMUSG00000028778	18	18	10	8	0.13253	4.10065	3.93628	6.22507	6.0654	22.25	15.4	No	19.864	13.9264	16.5653	-0.527892	0.278275	3.69279	3.5771e-10	8.79197e-09	-0.249617	-0.806167	GC_LAR	Hcrtr1	hypocretin (orexin) receptor 1	230777
ENSMUSG00000035847	18	18	10	8	0.077664	11.3345	11.4302	11.3494	11.4877	2681.5	2962.7	No	2541.69	2802.01	2686.31	0.141762	0.0545613	6.72274	2.22045e-16	9.41863e-15	0.196324	0.087201	FLT_LAR	Ids	iduronate 2-sulfatase	15931
ENSMUSG00000033540	18	18	10	8	0.0773219	9.15511	9.23868	9.30317	9.41764	609	650.9	No	565.594	613.398	592.152	0.107993	0.0875791	1.52668	0.00952117	0.0597607	0.195572	0.0204136	FLT_LAR	Idua	iduronidase, alpha-L	15932
ENSMUSG00000066756	18	9	3	6	0.3	0.768058	0.600927	5.57976	5.28519	3.25	0.4	No	4.07699	0.380986	2.02365	-3.2233	1.10368	8.55112	2.22045e-16	9.41863e-15	-2.11962	-4.32698	GC_LAR	Igfl3	IGF-like family member 3	232925
ENSMUSG00000036826	18	18	10	8	0.102009	5.21129	4.95597	6.68345	6.42722	43.125	30.2	No	45.5188	29.5467	36.6454	-0.614676	0.334446	3.38543	8.95348e-09	1.87027e-07	-0.28023	-0.949122	GC_LAR	Igflr1	IGF-like family receptor 1	101883
ENSMUSG00000018654	18	18	10	8	0.110618	9.10048	8.89384	9.32852	9.05286	632.75	484.6	No	597.862	465.332	524.234	-0.362819	0.181002	4.04329	6.57119e-12	1.89907e-10	-0.181817	-0.543821	GC_LAR	Ikzf1	IKAROS family zinc finger 1	22778
ENSMUSG00000020395	18	18	10	8	0.09911	7.07111	6.9048	7.69934	7.50857	154.125	123.9	No	144.597	116.944	129.234	-0.31266	0.170611	3.37804	9.64235e-09	2.00779e-07	-0.14205	-0.483271	GC_LAR	Itk	IL2 inducible T cell kinase	16428
ENSMUSG00000032763	18	18	10	8	0.087435	10.7882	10.8847	10.8202	10.9584	1912.75	2086.2	No	1751.17	1931.96	1851.61	0.140542	0.106425	1.73899	0.0031439	0.0231696	0.246967	0.0341179	FLT_LAR	Ilvbl	ilvB (bacterial acetolactate synthase)-like	216136
ENSMUSG00000056708	18	18	10	8	0.0807879	9.98153	10.1474	10.0368	10.2709	1068.38	1247.1	No	983.219	1168.69	1086.26	0.245616	0.0873621	7.8658	2.22045e-16	9.41863e-15	0.332978	0.158254	FLT_LAR	Ier5	immediate early response 5	15939
ENSMUSG00000087642	18	18	10	8	0.347887	5.72042	5.53454	6.90464	6.72499	110.125	53.9	No	87.392	52.4313	67.9694	-0.744486	0.593502	1.59023	0.00691973	0.0454273	-0.150984	-1.33799	GC_LAR	Ighe	Immunoglobulin heavy constant epsilon	380792
ENSMUSG00000076613	18	18	10	8	0.142005	11.479	10.9917	11.6135	10.9234	4153.88	2362.6	No	3708.38	2173.1	2855.45	-0.771235	0.386812	4.00753	1.00382e-11	2.85708e-10	-0.384423	-1.15805	GC_LAR	Ighg2b	immunoglobulin heavy constant gamma 2B	16016
ENSMUSG00000076612	18	18	10	8	0.179671	9.4791	9.05313	9.7061	9.14264	1162.88	628.1	No	1042.35	613.465	804.079	-0.765507	0.482251	2.54035	1.60134e-05	0.000205432	-0.283256	-1.24776	GC_LAR	Ighg2c	immunoglobulin heavy constant gamma 2C	404711
ENSMUSG00000076615	18	18	10	8	0.210771	8.7912	8.47961	9.08009	8.68127	703.875	424.7	No	651.373	422.589	524.271	-0.625186	0.496519	1.59877	0.00662385	0.0437141	-0.128667	-1.12171	GC_LAR	Ighg3	Immunoglobulin heavy constant gamma 3	380795
ENSMUSG00000095981	18	18	10	8	0.521869	8.19596	7.75537	8.36885	7.94388	1772.12	1063	No	1801.09	1025.91	112.985	-0.892078	0.493511	3.29488	2.19766e-08	4.36198e-07	-0.398567	-1.38559	GC_LAR	Ighv10-1	immunoglobulin heavy variable 10-1	380808
ENSMUSG00000095583	18	18	10	8	0.278884	6.84406	6.07754	7.73666	6.91159	271.875	83.7	No	236.933	77.9061	148.585	-1.60516	0.726596	4.83882	2.22045e-16	9.41863e-15	-0.878561	-2.33175	GC_LAR	Ighv14-2	immunoglobulin heavy variable 14-2	668421
ENSMUSG00000076666	18	16	9	7	0.418149	4.00741	4.14579	6.04321	6.19172	36.25	27.2	No	27.4696	27.8922	19.2058	1.72997	0.748803	4.92868	2.22045e-16	9.41863e-15	2.47878	0.98117	FLT_LAR	Ighv14-4	immunoglobulin heavy variable 14-4	629826
ENSMUSG00000076710	18	10	5	5	0.707143	1.47441	1.72047	5.35055	5.65196	0.75	13.4	No	0.613422	10.665	6.19766	3.94212	1.33085	7.4544	2.22045e-16	9.41863e-15	5.27297	2.61128	FLT_LAR	Ighv1-49	immunoglobulin heavy variable 1-49	629925
ENSMUSG00000093894	18	18	10	8	0.197142	9.67581	9.1674	9.89859	9.21351	1670.25	966.2	No	1429.31	800.75	1080.11	-0.835898	0.681567	1.51578	0.0100463	0.0624458	-0.154331	-1.51746	GC_LAR	Ighv1-53	immunoglobulin heavy variable 1-53	780931
ENSMUSG00000095589	18	18	10	8	0.526873	8.8507	8.55133	9.12447	8.73255	1089.38	1668.2	No	887.517	1211.52	590.442	-1.33118	0.708167	3.53143	2.00496e-09	4.49902e-08	-0.623016	-2.03935	GC_LAR	Ighv1-55	immunoglobulin heavy variable 1-55	780932
ENSMUSG00000095889	18	18	10	8	0.374885	5.21504	4.67089	6.7801	6.25704	92.375	35.2	No	73.0584	30.822	49.5937	-1.24552	0.725828	2.95688	5.12313e-07	8.47379e-06	-0.519692	-1.97135	GC_LAR	Ighv1-58	immunoglobulin heavy variable 1-58	780939
ENSMUSG00000096464	18	18	10	8	0.313185	8.61533	7.47198	9.13007	7.73302	722.625	242.5	No	684.045	210.589	421.014	-1.69886	0.645616	6.83772	2.22045e-16	9.41863e-15	-1.05324	-2.34448	GC_LAR	Ighv2-2	immunoglobulin heavy variable 2-2	777686
ENSMUSG00000076670	18	18	10	8	0.261034	5.24803	6.44413	6.38376	7.60883	63.375	266.5	No	63.729	283.435	185.788	2.15186	1.04688	3.70805	3.02776e-10	7.5262e-09	3.19874	1.10497	FLT_LAR	Ighv3-5	immunoglobulin heavy variable 3-5	633457
ENSMUSG00000076665	18	18	10	8	0.366934	5.04496	6.14275	6.25214	7.36314	32.375	211.2	No	25.4963	191.305	117.613	2.89601	0.816724	10.3791	2.22045e-16	9.41863e-15	3.71273	2.07928	FLT_LAR	Ighv7-1	immunoglobulin heavy variable 7-1	780799
ENSMUSG00000076652	18	18	10	8	0.348577	10.248	9.75372	10.4292	9.74625	2123.12	1050.1	No	1883.54	1001.15	1393.32	-0.911703	0.507315	3.25174	3.34395e-08	6.49023e-07	-0.404388	-1.41902	GC_LAR	Ighv7-3	immunoglobulin heavy variable 7-3	629822
ENSMUSG00000076668	18	13	8	5	0.686642	3.75641	3.55753	6.1368	5.76066	82.5	14.1	No	59.4314	10.9073	9.3426	-1.441	1.03109	1.96375	0.000852913	0.00740289	-0.409909	-2.4721	GC_LAR	Ighv7-4	immunoglobulin heavy variable 7-4	632654
ENSMUSG00000096805	18	17	10	7	0.281034	6.49605	5.27429	7.63109	6.44757	361.125	59.1	No	287.53	55.6086	158.685	-2.37081	1.01646	5.20258	2.22045e-16	9.41863e-15	-1.35435	-3.38728	GC_LAR	Ighv9-1	immunoglobulin heavy variable 9-1	195180
ENSMUSG00000094322	18	18	10	8	0.242742	6.6678	5.47926	7.70914	6.50409	204.125	46.8	No	188.073	44.2896	108.193	-2.08673	0.614183	11.2275	2.22045e-16	9.41863e-15	-1.47255	-2.70092	GC_LAR	Ighv9-4	immunoglobulin heavy variable 9-4	636260
ENSMUSG00000095700	18	18	10	8	0.233107	8.84604	7.64011	9.32974	7.85634	915.25	330.4	No	847.409	292.376	539.057	-1.53524	0.735724	4.32531	2.04725e-13	6.78949e-12	-0.799512	-2.27096	GC_LAR	Ighv10-3	immunoglobulin heavy variable V10-3	380809
ENSMUSG00000094652	18	18	10	8	0.287415	6.68722	5.98252	7.63009	6.87098	263	83.6	No	234.347	70.6009	143.377	-1.73016	0.720034	5.70217	2.22045e-16	9.41863e-15	-1.01013	-2.4502	GC_LAR	Ighv1-42	immunoglobulin heavy variable V1-42	629906
ENSMUSG00000095642	18	18	10	8	0.315041	7.658	6.9317	8.3212	7.47334	540.875	256.1	No	516.566	205.131	343.546	-1.33192	0.862443	2.38358	5.1653e-05	0.000595539	-0.469472	-2.19436	GC_LAR	Ighv14-3	immunoglobulin heavy variable V14-3	238418
ENSMUSG00000096499	18	18	10	8	0.393403	5.69087	5.96469	6.79814	7.09197	71.625	151.9	No	65.0341	159.916	117.746	1.29853	0.866276	2.10946	0.000340342	0.00324182	2.1648	0.432251	FLT_LAR	Ighv1-5	immunoglobulin heavy variable V1-5	668469
ENSMUSG00000095863	18	13	7	6	0.385714	1.68616	1.51413	5.65606	5.44616	6.375	1.9	No	6.14522	1.65386	3.65002	-1.81293	0.899087	4.08137	4.168e-12	1.23301e-10	-0.913848	-2.71202	GC_LAR	Ighv1-67	immunoglobulin heavy variable V1-67	435328
ENSMUSG00000094124	18	18	10	8	0.475591	5.70785	5.4545	7.0251	6.68973	228	143.3	No	169.465	111.712	35.0501	-0.699905	0.477946	2.14634	0.000267267	0.00261685	-0.221959	-1.17785	GC_LAR	Ighv1-74	immunoglobulin heavy variable V1-74	100775173
ENSMUSG00000094102	18	16	8	8	0.444814	5.32132	4.56909	6.92812	6.14877	152.375	28.5	No	145.258	27.3701	79.7646	-2.40903	1.10428	4.54296	1.19904e-14	4.44761e-13	-1.30475	-3.5133	GC_LAR	Ighv9-2	immunoglobulin heavy variable V9-2	629818
ENSMUSG00000067149	18	18	10	8	0.156573	15.1735	14.6816	15.2942	14.5628	47740	28327.3	No	41842.7	26515.7	33327.7	-0.658152	0.262387	6.34405	2.22045e-16	9.41863e-15	-0.395765	-0.920539	GC_LAR	Jchain	immunoglobulin joining chain	16069
ENSMUSG00000076570	18	14	7	7	0.360465	3.56848	3.44054	6.0149	5.818	19.5	18.8	No	17.9383	22.9244	11.7907	-1.38692	0.962702	2.075	0.000425148	0.00397584	-0.424215	-2.34962	GC_LAR	Igkv12-38	immunoglobulin kappa chain variable 12-38	620050
ENSMUSG00000095007	18	18	10	8	0.533904	6.89007	6.05295	7.73763	6.91233	453	116.9	No	327.594	105.521	204.22	-1.63499	0.907605	3.21376	4.8177e-08	9.1613e-07	-0.727388	-2.5426	GC_LAR	Igkv12-41	immunoglobulin kappa chain variable 12-41	619960
ENSMUSG00000076534	18	17	9	8	0.217703	4.26536	3.63062	6.40386	5.81994	40	9.8	No	35.1328	10.3986	21.3916	-1.77598	0.728868	5.86602	2.22045e-16	9.41863e-15	-1.04712	-2.50485	GC_LAR	Igkv12-89	immunoglobulin kappa chain variable 12-89	384411
ENSMUSG00000076538	18	18	10	8	0.211569	6.97326	6.43282	7.75193	7.17736	235	124.9	No	208.915	115.149	156.823	-0.860631	0.672753	1.64943	0.0050911	0.0347768	-0.187878	-1.53338	GC_LAR	Igkv13-84	immunoglobulin kappa chain variable 13-84	692152
ENSMUSG00000096515	18	18	10	8	0.464084	5.28261	4.89831	6.77243	6.40564	109	36.7	No	86.9041	38.4882	60.0064	-1.18134	0.798658	2.19578	0.000192182	0.00194094	-0.382682	-1.98	GC_LAR	Igkv14-100	immunoglobulin kappa chain variable 14-100	243439
ENSMUSG00000076535	18	15	8	7	0.557666	4.85497	5.08063	6.35342	6.58093	57.125	170.2	No	43.1795	165.241	110.992	1.93294	1.37781	1.76109	0.00278198	0.0208028	3.31075	0.555124	FLT_LAR	Igkv1-88	immunoglobulin kappa chain variable 1-88	692154
ENSMUSG00000098814	18	18	10	8	0.232403	8.02921	7.63501	8.49379	8.00391	429	287.6	No	486.75	242.721	351.178	-1.00179	0.654028	2.35904	6.16648e-05	0.000695124	-0.347764	-1.65582	GC_LAR	Igkv19-93	immunoglobulin kappa chain variable 19-93	692161
ENSMUSG00000094433	18	18	10	8	0.214318	9.77811	8.94805	10.0865	8.96468	1305.38	507.6	No	1160.1	480.887	782.759	-1.27114	0.350941	13.1317	2.22045e-16	9.41863e-15	-0.920199	-1.62208	GC_LAR	Igkv5-43	immunoglobulin kappa chain variable 5-43	381783
ENSMUSG00000094094	18	18	10	8	0.342767	3.66773	3.39608	6.14223	5.82679	21.875	14.3	No	19.8298	14.4653	11.2486	-2.2421	0.576151	14.9136	2.22045e-16	9.41863e-15	-1.66595	-2.81825	GC_LAR	Igkv5-45	immunoglobulin kappa chain variable 5-45	545850
ENSMUSG00000094930	18	18	10	8	0.250565	7.02435	5.90769	7.89765	6.73965	242.375	71.5	No	216.842	66.492	133.314	-1.70625	0.589096	8.296	2.22045e-16	9.41863e-15	-1.11716	-2.29535	GC_LAR	Igkv6-25	immunoglobulin kappa chain variable 6-25	381784
ENSMUSG00000076583	18	18	10	8	0.421551	7.92615	8.12614	8.24731	8.51459	294.625	787.9	No	261.173	714.699	513.132	1.45198	0.757669	3.40965	7.01419e-09	1.48523e-07	2.20965	0.694315	FLT_LAR	Igkv8-24	immunoglobulin kappa chain variable 8-24	677858
ENSMUSG00000076580	18	18	10	8	0.189825	8.1979	7.48415	8.71164	7.83649	534.875	230.6	No	782.029	225.13	472.641	-1.79496	0.760306	5.47871	2.22045e-16	9.41863e-15	-1.03465	-2.55527	GC_LAR	Igkv8-27	immunoglobulin kappa chain variable 8-27	434041
ENSMUSG00000076577	18	18	10	8	0.241547	8.31978	7.54127	8.80631	7.86758	713.875	292.5	No	602.097	275.544	420.679	-1.12815	0.740113	2.33271	7.44426e-05	0.00082121	-0.388039	-1.86826	GC_LAR	Igkv8-30	immunoglobulin kappa chain variable 8-30	384419
ENSMUSG00000094872	18	18	10	8	0.412657	8.19381	7.40214	8.74101	7.77504	1747.5	223.2	No	1298.88	216.978	697.824	-2.58198	0.887105	7.9924	2.22045e-16	9.41863e-15	-1.69487	-3.46908	GC_LAR	Igkv9-120	immunoglobulin kappa chain variable 9-120	434025
ENSMUSG00000096632	18	18	10	8	0.320218	8.34713	7.24884	8.92053	7.58675	772.375	172.5	No	726.869	164.44	414.409	-2.14417	0.686991	9.42746	2.22045e-16	9.41863e-15	-1.45718	-2.83116	GC_LAR	Igkv9-124	immunoglobulin kappa chain variable 9-124	243431
ENSMUSG00000076609	18	18	10	8	0.157214	16.2769	15.8772	16.3653	15.7647	110636	71503.6	No	93102.2	65572.3	77807.8	-0.505739	0.346999	2.14107	0.000276736	0.00269751	-0.15874	-0.852738	GC_LAR	Igkc	immunoglobulin kappa constant	16071
ENSMUSG00000096490	18	18	10	8	0.528448	7.98609	7.92586	8.33232	8.29797	1051.88	476.7	No	805.333	451.429	331.522	1.31113	0.686528	3.42367	6.08516e-09	1.29582e-07	1.99766	0.6246	FLT_LAR	Igkv10-94	immunoglobulin kappa variable 10-94	667550
ENSMUSG00000094902	18	14	7	7	0.238095	1.1538	1.06885	5.59008	5.44025	3.5	1.4	No	3.3197	1.49131	2.30393	-1.23531	0.747887	2.73813	3.31704e-06	4.81428e-05	-0.487419	-1.98319	GC_LAR	Igkv10-95	immunoglobulin kappa variable 10-95	434031
ENSMUSG00000093861	18	18	10	8	0.274286	11.6904	11.4518	11.7524	11.3681	5628.5	4867.7	No	4729.4	5113.89	3417.68	-0.997875	0.452994	4.88103	2.22045e-16	9.41863e-15	-0.544881	-1.45087	GC_LAR	Igkv1-110	immunoglobulin kappa variable 1-110	381777
ENSMUSG00000095737	18	14	6	8	0.414474	2.66551	2.34442	5.92223	5.47346	14.375	3.7	No	13.6997	4.33331	6.57399	-4.09533	0.862897	22.5544	2.22045e-16	9.41863e-15	-3.23244	-4.95823	GC_LAR	Igkv11-125	immunoglobulin kappa variable 11-125	243428
ENSMUSG00000096336	18	18	10	8	0.153977	9.3536	8.40586	9.72842	8.48425	956.875	412.6	No	828.374	402.891	591.995	-1.0407	0.457386	5.20507	2.22045e-16	9.41863e-15	-0.583318	-1.49809	GC_LAR	Igkv1-135	immunoglobulin kappa variable 1-135	243420
ENSMUSG00000095771	18	18	10	8	0.242675	10.2791	9.23414	10.5836	9.14227	2474.38	897.6	No	2080.84	849.291	1396.65	-1.29283	0.680507	3.60976	8.7642e-10	2.05794e-08	-0.612326	-1.97334	GC_LAR	Igkv14-111	immunoglobulin kappa variable 14-111	545847
ENSMUSG00000094345	18	18	10	8	0.544528	6.07899	5.49862	7.2388	6.66197	264.125	82.9	No	199.613	64.8067	124.721	-1.62229	0.888881	3.30292	2.03123e-08	4.05614e-07	-0.733404	-2.51117	GC_LAR	Igkv14-126	immunoglobulin kappa variable 14-126	628127
ENSMUSG00000096461	18	10	6	4	0.844693	3.97821	3.90555	5.98425	5.58059	100	9.5	No	71.3897	9.29407	3.15989	-1.83255	1.20803	2.30633	8.97224e-05	0.000970633	-0.624517	-3.04057	GC_LAR	Igkv14-130	immunoglobulin kappa variable 14-130	628072
ENSMUSG00000076522	18	18	10	8	0.161451	8.4052	7.29117	8.94947	7.60609	498.625	163.5	No	703.069	150.631	396.159	-2.21912	0.543664	16.0527	2.22045e-16	9.41863e-15	-1.67545	-2.76278	GC_LAR	Igkv16-104	immunoglobulin kappa variable 16-104	381778
ENSMUSG00000076514	18	18	10	8	0.265947	7.04106	6.57794	7.76533	7.25897	232.125	120	No	185.955	112.591	145.197	-0.726748	0.500319	2.13005	0.000297522	0.00287455	-0.226429	-1.22707	GC_LAR	Igkv17-121	immunoglobulin kappa variable 17-121	667435
ENSMUSG00000076525	18	11	8	3	0.378378	2.03476	2.28133	5.40317	5.7572	2	9.5	No	2.03859	8.18485	5.45318	1.99188	1.05077	3.32506	1.63338e-08	3.30178e-07	3.04265	0.941107	FLT_LAR	Igkv1-99	immunoglobulin kappa variable 1-99	434028
ENSMUSG00000094117	18	18	10	8	0.438607	7.89837	7.36327	8.42046	7.78405	765.5	251.7	No	585.215	227.542	386.508	-1.36325	0.779239	3.05661	2.09143e-07	3.6498e-06	-0.584015	-2.14249	GC_LAR	Igkv3-12	immunoglobulin kappa variable 3-12	667914
ENSMUSG00000095351	18	18	10	8	0.483467	9.17913	7.78576	9.65525	7.91665	1535.12	314.3	No	1503.2	270.51	818.374	-2.47397	0.770945	9.7811	2.22045e-16	9.41863e-15	-1.70303	-3.24492	GC_LAR	Igkv3-2	immunoglobulin kappa variable 3-2	626583
ENSMUSG00000096715	18	18	10	8	0.295405	6.22448	5.75146	7.26274	6.77508	140	70.8	No	132.796	61.1159	92.9737	-1.11938	0.606482	3.42595	5.94637e-09	1.26832e-07	-0.512898	-1.72586	GC_LAR	Igkv3-4	immunoglobulin kappa variable 3-4	626347
ENSMUSG00000076598	18	18	10	8	0.589795	8.62332	7.42824	9.15271	7.68528	1289.62	175.5	No	1025.06	160.98	545.015	-2.67086	0.675965	14.6536	2.22045e-16	9.41863e-15	-1.99489	-3.34682	GC_LAR	Igkv3-7	immunoglobulin kappa variable 3-7	108005
ENSMUSG00000095338	18	11	6	5	0.430556	2.10479	2.29083	5.5054	5.66322	3.375	11.7	No	3.01478	10.2421	7.02994	1.73924	1.23993	1.82855	0.0019001	0.0149345	2.97918	0.499308	FLT_LAR	Igkv3-9	immunoglobulin kappa variable 3-9	667928
ENSMUSG00000095753	18	18	10	8	0.587029	6.90354	6.22547	7.78063	7.01759	416	86.6	No	341.431	78.9392	195.602	-2.11287	0.746859	7.76189	2.22045e-16	9.41863e-15	-1.36601	-2.85973	GC_LAR	Igkv4-53	immunoglobulin kappa variable 4-53	546213
ENSMUSG00000096833	18	18	10	8	0.302953	7.47938	6.40464	8.25036	7.0845	479.875	124.1	No	428.021	133.626	264.469	-1.68065	0.844903	3.90938	3.15252e-11	8.58263e-10	-0.835745	-2.52555	GC_LAR	Igkv4-55	immunoglobulin kappa variable 4-55	385253
ENSMUSG00000076556	18	18	10	8	0.20898	7.24078	7.48177	7.71915	8.02446	186.25	334.3	No	168.557	298.763	240.893	0.824013	0.572527	2.00547	0.000659527	0.00587564	1.39654	0.251486	FLT_LAR	Igkv4-57	immunoglobulin kappa variable 4-57	235952
ENSMUSG00000095633	18	18	10	8	0.403347	5.83635	5.36899	7.09052	6.57115	188.25	76.5	No	177.321	88.9392	43.1992	-1.34062	0.666102	4.06071	5.3384e-12	1.55648e-10	-0.674521	-2.00672	GC_LAR	Igkv4-58	immunoglobulin kappa variable 4-58	381831
ENSMUSG00000094262	18	11	8	3	0.784615	3.01724	3.2389	5.33846	6.00001	1.125	44.6	No	1.10312	44.277	5.54011	2.98242	1.2604	4.90598	2.22045e-16	9.41863e-15	4.24282	1.72203	FLT_LAR	Igkv4-62	immunoglobulin kappa variable 4-62	636752
ENSMUSG00000076549	18	18	10	8	0.35861	7.61072	6.69327	8.27229	7.27671	423.75	181.9	No	348.278	160.302	243.847	-1.1198	0.748661	2.24726	0.000135352	0.00141311	-0.371138	-1.86846	GC_LAR	Igkv4-68	immunoglobulin kappa variable 4-68	384515
ENSMUSG00000076540	18	18	10	8	0.36115	4.92884	5.50828	6.38157	6.92265	41.125	179.2	No	41.8433	136	94.1527	1.70211	0.986887	2.71291	4.07904e-06	5.81435e-05	2.689	0.715227	FLT_LAR	Igkv4-80	immunoglobulin kappa variable 4-80	545848
ENSMUSG00000076571	18	9	4	5	0.762887	2.29244	1.87279	5.84719	5.36054	34.75	1.3	No	25.5926	1.62533	12.2774	-4.01955	1.72261	4.6762	1.9984e-15	7.95098e-14	-2.29694	-5.74216	GC_LAR	Igkv5-37	immunoglobulin kappa variable 5-37	384417
ENSMUSG00000094797	18	18	10	8	0.638756	9.44389	8.69741	9.73667	8.76471	2604	424.8	No	2571.78	402.919	475.31	-0.491123	0.361323	1.8627	0.00155934	0.0125564	-0.1298	-0.852446	GC_LAR	Igkv6-15	immunoglobulin kappa variable 6-15	108022
ENSMUSG00000076589	18	12	6	6	0.697819	3.45646	3.79148	5.64246	6.16198	7	90.7	No	5.57074	83.5474	13.0909	1.76109	1.36519	1.52868	0.00942781	0.0593163	3.12628	0.395901	FLT_LAR	Igkv8-18	immunoglobulin kappa variable 8-18	667859
ENSMUSG00000096594	18	18	10	8	0.38754	7.15435	6.61245	7.87628	7.28408	290.125	241.4	No	247.015	183.917	148.587	-1.825	0.508484	12.6749	2.22045e-16	9.41863e-15	-1.31652	-2.33349	GC_LAR	Igkv8-19	immunoglobulin kappa variable 8-19	232065
ENSMUSG00000076586	18	18	10	8	0.213014	8.30631	7.43916	8.84237	7.73116	574.25	270.6	No	949.957	233.169	551.741	-2.025	0.84925	5.53235	2.22045e-16	9.41863e-15	-1.17575	-2.87425	GC_LAR	Igkv8-21	immunoglobulin kappa variable 8-21	620400
ENSMUSG00000094356	18	18	10	8	0.412191	6.10634	6.4676	6.98093	7.4088	106.625	246.1	No	84.6936	213.91	156.48	1.33357	0.810395	2.54005	1.60514e-05	0.00020582	2.14396	0.523171	FLT_LAR	Igkv8-28	immunoglobulin kappa variable 8-28	434040
ENSMUSG00000076512	18	18	10	8	0.292204	7.7411	6.11194	8.57864	6.78555	886.625	136	No	736.597	142.848	406.737	-2.36697	1.1401	4.11927	2.639e-12	7.90468e-11	-1.22687	-3.50706	GC_LAR	Igkv9-123	immunoglobulin kappa variable 9-123	628144
ENSMUSG00000093906	18	12	6	6	0.384106	2.48938	2.08324	5.84964	5.43852	16.625	1.8	No	13.4406	2.00175	7.08569	-2.79314	1.0469	6.76588	2.22045e-16	9.41863e-15	-1.74624	-3.84004	GC_LAR	Igkv9-129	immunoglobulin kappa variable 9-129	692182
ENSMUSG00000105906	18	18	10	8	0.199084	12.3087	11.5433	12.4848	11.3498	7370.75	3846.5	No	6997.07	3735.02	5184.82	-0.905587	0.50216	3.27473	2.67537e-08	5.25463e-07	-0.403428	-1.40775	GC_LAR	Iglc1	immunoglobulin lambda constant 1	110785
ENSMUSG00000076937	18	18	10	8	0.202378	11.0583	10.3751	11.2648	10.2917	2945.62	1512.5	No	2676.12	1359.14	1944.47	-0.977208	0.346148	8.01878	2.22045e-16	9.41863e-15	-0.63106	-1.32336	GC_LAR	Iglc2	immunoglobulin lambda constant 2	110786
ENSMUSG00000076934	18	18	10	8	0.185707	11.6686	10.8109	11.8934	10.6276	4671.12	2331.8	No	4252.3	2335.06	3187.17	-0.864817	0.49869	3.02938	2.67842e-07	4.60994e-06	-0.366127	-1.36351	GC_LAR	Iglv1	immunoglobulin lambda variable 1	16142
ENSMUSG00000076939	18	18	10	8	0.701176	7.03296	6.28964	7.85942	6.99058	518.625	70	No	389.909	66.85	82.3679	-0.606416	0.253854	5.74435	2.22045e-16	9.41863e-15	-0.352562	-0.86027	GC_LAR	Iglv3	immunoglobulin lambda variable 3	404743
ENSMUSG00000032394	18	18	10	8	0.151261	2.63487	2.53691	5.83692	5.72037	7.75	5.7	No	7.95491	5.05492	6.3438	-0.558755	0.458915	1.49653	0.0110361	0.0676076	-0.0998402	-1.01767	GC_LAR	Igdcc3	immunoglobulin superfamily, DCC subclass, member 3	19289
ENSMUSG00000022790	18	18	10	8	0.0949502	6.9847	7.25511	7.52594	7.84132	129.25	177.8	No	119.301	167.48	146.067	0.485474	0.194057	6.18209	2.22045e-16	9.41863e-15	0.679531	0.291417	FLT_LAR	Igsf11	immunoglobulin superfamily, member 11	207683
ENSMUSG00000035004	18	18	10	8	0.0951009	7.3782	7.27164	7.89905	7.77442	187.625	162.2	No	172.638	152.413	161.402	-0.193285	0.125547	2.39226	4.84963e-05	0.0005621	-0.0677379	-0.318831	GC_LAR	Igsf6	immunoglobulin superfamily, member 6	80719
ENSMUSG00000037995	18	18	10	8	0.0813801	11.8477	12.0242	11.8278	12.0833	3701.12	4569.2	No	3610.1	4360.27	4026.86	0.272728	0.145559	3.48072	3.39465e-09	7.45829e-08	0.418288	0.127169	FLT_LAR	Igsf9	immunoglobulin superfamily, member 9	93842
ENSMUSG00000022900	18	18	10	8	0.0945593	12.6521	12.8158	12.6239	12.861	6832.88	8191.8	No	6295.03	7544.1	6988.96	0.261073	0.142019	3.35281	1.24064e-08	2.54903e-07	0.403092	0.119053	FLT_LAR	Ildr1	immunoglobulin-like domain containing receptor 1	106347
ENSMUSG00000040029	18	18	10	8	0.0903176	11.8406	11.9435	11.8407	11.9908	4024.62	4356.9	No	3633.61	4015.33	3845.68	0.142938	0.0989927	2.07829	0.000416271	0.00390146	0.241931	0.043945	FLT_LAR	Ipo8	importin 8	320727
ENSMUSG00000074918	18	18	10	8	0.0861289	10.3645	10.501	10.4048	10.5986	1432.38	1617.4	No	1296.91	1495.14	1407.04	0.202756	0.120273	2.82995	1.53919e-06	2.34798e-05	0.323029	0.0824838	FLT_LAR	Inafm2	InaF motif containing 2	100043272
ENSMUSG00000031549	18	15	8	7	0.152542	1.85901	1.72228	5.69259	5.52352	4.375	2.4	No	6.52155	2.44288	4.25562	-1.28663	0.804191	2.58273	1.15332e-05	0.000152035	-0.48244	-2.09082	GC_LAR	Ido2	indoleamine 2,3-dioxygenase 2	209176
ENSMUSG00000026009	18	18	10	8	0.107651	6.26372	6.11061	7.17635	7.02041	97.125	70	No	85.7383	67.1785	75.4273	-0.379784	0.225437	2.8789	1.0124e-06	1.59623e-05	-0.154347	-0.605221	GC_LAR	Icos	inducible T cell co-stimulator	54167
ENSMUSG00000037035	18	18	10	8	0.0926539	6.13346	6.33339	7.00183	7.22815	73.5	92.3	No	66.6502	88.4388	78.7549	0.3851	0.220521	3.03874	2.46062e-07	4.25456e-06	0.60562	0.164579	FLT_LAR	Inhbb	inhibin beta-B	16324
ENSMUSG00000033688	18	18	10	8	0.355769	3.43994	3.05431	6.12378	5.74529	18.75	5.8	No	20.3835	6.18205	12.4938	-1.73976	0.609703	8.02158	2.22045e-16	9.41863e-15	-1.13006	-2.34946	GC_LAR	Inhca	inhibitor of carbonic anhydrase	71775
ENSMUSG00000057054	18	18	10	8	0.0951894	5.76803	5.56363	6.92389	6.71693	63.25	47.1	No	59.5394	44.6494	51.2672	-0.426894	0.15526	7.58393	2.22045e-16	9.41863e-15	-0.271635	-0.582154	GC_LAR	Inca1	inhibitor of CDK, cyclin A1 interacting protein 1	103844
ENSMUSG00000042745	18	18	10	8	0.0880421	11.295	11.1917	11.3629	11.2132	2729.75	2506	No	2564.76	2327.82	2433.13	-0.139526	0.0987056	2.00438	0.000664022	0.00591368	-0.0408207	-0.238232	GC_LAR	Id1	inhibitor of DNA binding 1, HLH protein	15901
ENSMUSG00000007872	18	18	10	8	0.0852773	10.3758	10.2719	10.479	10.332	1412.12	1322.3	No	1362.8	1226.26	1286.95	-0.149084	0.10029	2.21563	0.000168027	0.00171876	-0.0487943	-0.249374	GC_LAR	Id3	inhibitor of DNA binding 3	15903
ENSMUSG00000030330	18	18	10	8	0.0931111	10.8323	10.7529	10.9091	10.795	1988.75	1823.2	No	1858.6	1717.04	1779.95	-0.115178	0.0944735	1.49033	0.0113732	0.0693336	-0.0207041	-0.209651	GC_LAR	Ing4	inhibitor of growth family, member 4	28019
ENSMUSG00000066607	18	18	10	8	0.100715	6.2783	6.48621	7.09063	7.31881	78.375	105.1	No	72.6636	97.0182	86.1939	0.411055	0.172343	5.6696	2.22045e-16	9.41863e-15	0.583399	0.238712	FLT_LAR	Insyn1	inhibitory synaptic factor 1	319477
ENSMUSG00000073805	18	12	6	6	0.240741	1.67312	1.51139	5.64398	5.4461	4.375	1.9	No	6.58947	1.86224	3.96323	-1.73969	1.03408	2.78387	2.26945e-06	3.38731e-05	-0.705612	-2.77377	GC_LAR	Insyn2a	inhibitory synaptic factor 2A	627214
ENSMUSG00000069911	18	18	10	8	0.117904	3.48926	3.59942	5.94419	6.05265	10.5	14.5	No	10.4371	13.8961	12.3588	0.469682	0.354375	1.75125	0.0029382	0.0217974	0.824057	0.115308	FLT_LAR	Insyn2b	inhibitory synaptic factor family member 2B	574403
ENSMUSG00000021385	18	18	10	8	0.106803	10.8787	11.0985	10.8737	11.1882	2003.5	2495.4	No	1831.62	2328.47	2107.65	0.345717	0.164053	4.39366	8.54872e-14	2.90469e-12	0.50977	0.181664	FLT_LAR	Ippk	inositol 1,3,4,5,6-pentakisphosphate 2-kinase	75678
ENSMUSG00000057963	18	18	10	8	0.0884936	12.2612	12.3951	12.2451	12.4401	5315	6109.2	No	4818.72	5603.44	5254.68	0.217233	0.135705	2.54679	1.52395e-05	0.000196656	0.352938	0.0815278	FLT_LAR	Itpk1	inositol 1,3,4-triphosphate 5/6 kinase	217837
ENSMUSG00000030287	18	18	10	8	0.076732	11.6293	11.7812	11.6198	11.8411	3313.88	3789.5	No	3132.32	3633.47	3410.74	0.213542	0.131633	2.6155	8.91741e-06	0.000119976	0.345175	0.0819089	FLT_LAR	Itpr2	inositol 1,4,5-triphosphate receptor 2	16439
ENSMUSG00000030263	18	18	10	8	0.0864719	9.79047	9.88761	9.87721	10.0138	945.625	1019.8	No	876.206	965.649	925.897	0.136812	0.0976913	1.95662	0.000890815	0.00768873	0.234503	0.0391205	FLT_LAR	Irag2	inositol 1,4,5-triphosphate receptor associated 2	16970
ENSMUSG00000024525	18	18	10	8	0.092195	9.55106	9.71641	9.63895	9.86841	809.5	950.1	No	733.591	870.134	809.449	0.241777	0.115463	4.36939	1.16573e-13	3.91541e-12	0.35724	0.126314	FLT_LAR	Impa2	inositol monophosphatase 2	114663
ENSMUSG00000006127	18	18	10	8	0.0838349	10.6653	10.5932	10.747	10.6441	1759.25	1633.1	No	1651.37	1535.11	1586.78	-0.106615	0.0805328	1.75733	0.00284074	0.0211759	-0.0260825	-0.187148	GC_LAR	Inpp5k	inositol polyphosphate 5-phosphatase K	19062
ENSMUSG00000048782	18	18	10	8	0.101283	6.85673	6.75326	7.53988	7.42018	129	115	No	122.111	106.077	113.203	-0.188496	0.149365	1.59789	0.00665397	0.0439019	-0.0391311	-0.337861	GC_LAR	Insc	INSC spindle orientation adaptor protein	233752
ENSMUSG00000055980	18	18	10	8	0.0920316	10.4346	10.5827	10.4665	10.6785	1467	1685.2	No	1386.53	1592.21	1500.8	0.198476	0.166037	1.42126	0.0157906	0.0917603	0.364512	0.032439	FLT_LAR	Irs1	insulin receptor substrate 1	16367
ENSMUSG00000047182	18	18	10	8	0.120507	4.62922	4.44491	6.41278	6.23514	31.25	22.3	No	27.8268	20.8638	23.9585	-0.441865	0.28139	2.50168	2.15126e-05	0.000268006	-0.160474	-0.723255	GC_LAR	Irs3	insulin receptor substrate 3	16369
ENSMUSG00000013415	18	18	10	8	0.160256	3.08244	2.97934	5.93612	5.82549	10.25	7.4	No	10.4236	7.05293	8.551	-0.499094	0.353624	2.06666	0.000448468	0.00417201	-0.14547	-0.852718	GC_LAR	Igf2bp1	insulin-like growth factor 2 mRNA binding protein 1	140486
ENSMUSG00000039323	18	18	10	8	0.181698	8.59	8.25675	8.91759	8.48785	500.875	357.7	No	455.39	318.823	379.52	-0.513671	0.323928	2.53565	1.66025e-05	0.000212471	-0.189743	-0.837599	GC_LAR	Igfbp2	insulin-like growth factor binding protein 2	16008
ENSMUSG00000026185	18	18	10	8	0.103447	12.3957	12.7604	12.3106	12.8486	5559.88	7883	No	5240.81	7362.71	6419.64	0.490235	0.166736	8.4991	2.22045e-16	9.41863e-15	0.65697	0.323499	FLT_LAR	Igfbp5	insulin-like growth factor binding protein 5	16011
ENSMUSG00000035551	18	15	7	8	0.131579	1.14592	1.06342	5.61312	5.44302	2.875	1.5	No	3.55201	1.53404	2.43091	-1.03188	0.70655	2.38991	4.93316e-05	0.000570524	-0.325325	-1.73843	GC_LAR	Igfbpl1	insulin-like growth factor binding protein-like 1	75426
ENSMUSG00000029547	18	18	10	8	0.0972545	11.0322	11.2049	11.0339	11.2822	2176.75	2691.3	No	2066.5	2466.3	2288.61	0.255169	0.154757	2.69839	4.59118e-06	6.49507e-05	0.409926	0.100412	FLT_LAR	Ints1	integrator complex subunit 1	68510
ENSMUSG00000018068	18	18	10	8	0.0870585	10.0492	10.1613	10.1146	10.2722	1136.88	1264.9	No	1047.33	1175.47	1118.52	0.165459	0.11695	1.99427	0.000706985	0.00626871	0.282409	0.0485083	FLT_LAR	Ints2	integrator complex subunit 2	70422
ENSMUSG00000037461	18	18	10	8	0.0863689	10.6267	10.7181	10.6668	10.7976	1713.5	1854.9	No	1566.53	1713.92	1648.41	0.127354	0.0927942	1.88108	0.00140013	0.0114318	0.220149	0.0345601	FLT_LAR	Ints7	integrator complex subunit 7	77065
ENSMUSG00000032243	18	18	10	8	0.102632	7.90762	8.08954	8.22503	8.4563	265.25	319.8	No	237.015	290.659	266.817	0.287624	0.201487	2.03037	0.000564407	0.00512723	0.489112	0.0861371	FLT_LAR	Itga11	integrin alpha 11	319480
ENSMUSG00000001507	18	18	10	8	0.084345	12.1078	12.2292	12.0985	12.275	4599.5	5323.9	No	4332.88	4941.02	4670.74	0.189596	0.106268	3.16599	7.58295e-08	1.41135e-06	0.295864	0.0833278	FLT_LAR	Itga3	integrin alpha 3	16400
ENSMUSG00000027009	18	18	10	8	0.0982263	10.6962	10.5806	10.7849	10.6227	1842	1576.5	No	1753.12	1521.06	1624.2	-0.205695	0.161153	1.63635	0.00545271	0.0369209	-0.0445428	-0.366848	GC_LAR	Itga4	integrin alpha 4	16401
ENSMUSG00000005947	18	18	10	8	0.103853	8.60199	8.47646	8.87496	8.71203	445	368.1	No	411.77	351.781	378.443	-0.231997	0.159267	2.13306	0.000291693	0.00282758	-0.0727298	-0.391264	GC_LAR	Itgae	integrin alpha E, epithelial-associated	16407
ENSMUSG00000030830	18	18	10	8	0.126783	8.97152	8.79641	9.20634	8.97454	585.5	463.9	No	557.71	442.201	493.538	-0.33561	0.225791	2.22309	0.000159714	0.00164267	-0.109818	-0.561401	GC_LAR	Itgal	integrin alpha L	16408
ENSMUSG00000027087	18	18	10	8	0.0821209	11.9184	12.0798	11.9014	12.1363	4114.75	4770.7	No	3793.05	4463.28	4165.4	0.233938	0.108637	4.60679	5.10703e-15	1.96647e-13	0.342576	0.125301	FLT_LAR	Itgav	integrin alpha V	16410
ENSMUSG00000020758	18	18	10	8	0.088559	12.4525	12.622	12.4224	12.6711	5756.5	7007.4	No	5598.12	6568.52	6137.23	0.230749	0.166741	1.90183	0.00123847	0.010252	0.39749	0.0640075	FLT_LAR	Itgb4	integrin beta 4	192897
ENSMUSG00000026971	18	18	10	8	0.10058	10.5199	10.6881	10.544	10.7827	1529.75	1843.4	No	1442.39	1736.31	1605.68	0.267775	0.161748	2.71863	3.89276e-06	5.57601e-05	0.429523	0.106027	FLT_LAR	Itgb6	integrin beta 6	16420
ENSMUSG00000001281	18	18	10	8	0.096318	8.73547	8.55635	9.00069	8.76799	521.75	402.8	No	464.116	376.148	415.245	-0.307429	0.213816	2.08342	0.000402775	0.00378037	-0.0936131	-0.521246	GC_LAR	Itgb7	integrin beta 7	16421
ENSMUSG00000025321	18	18	10	8	0.0851592	8.48439	8.61521	8.70977	8.88148	374.875	425.8	No	351.511	403.646	380.475	0.19313	0.112224	2.95152	5.37143e-07	8.84001e-06	0.305355	0.0809062	FLT_LAR	Itgb8	integrin beta 8	320910
ENSMUSG00000030890	18	18	10	8	0.0947146	11.7166	11.6178	11.7723	11.6296	3713.88	3378.5	No	3450.92	3112.4	3262.85	-0.148617	0.093964	2.51026	2.01562e-05	0.000252905	-0.0546532	-0.242581	GC_LAR	Ilk	integrin linked kinase	16202
ENSMUSG00000032925	18	18	10	8	0.134752	3.64997	3.82577	5.94587	6.135	12.5	18.2	No	10.7295	16.5619	13.9698	0.583099	0.351566	2.79476	2.07157e-06	3.10429e-05	0.934665	0.231533	FLT_LAR	Itgbl1	integrin, beta-like 1	223272
ENSMUSG00000021922	18	18	10	8	0.325688	5.49794	5.25243	6.83804	6.56206	82.375	64.9	No	84.865	72.4293	30.0067	-0.5742	0.420673	1.86824	0.00150965	0.0122274	-0.153527	-0.994872	GC_LAR	Itih4	inter alpha-trypsin inhibitor, heavy chain 4	16427
ENSMUSG00000064065	18	18	10	8	0.0974883	7.00794	6.88645	7.64572	7.50683	142.375	121	No	136.606	117.259	125.858	-0.221751	0.177097	1.57345	0.00753606	0.0489886	-0.0446537	-0.398848	GC_LAR	Ipcef1	interaction protein for cytohesin exchange factors 1	320495
ENSMUSG00000047220	18	15	8	7	0.129032	0.807161	0.75185	5.54184	5.43751	2.125	1.4	No	2.71272	1.24257	1.89597	-0.789324	0.727896	1.40141	0.017312	0.098976	-0.0614276	-1.51722	GC_LAR	Iho1	interactor of HORMAD1 1	434438
ENSMUSG00000032174	18	18	10	8	0.121622	1.9935	1.90542	5.72195	5.60751	5.375	3.1	No	5.09002	3.08835	3.97798	-0.78709	0.479407	2.70338	4.40843e-06	6.25336e-05	-0.307683	-1.2665	GC_LAR	Icam5	intercellular adhesion molecule 5, telencephalin	15898
ENSMUSG00000059108	18	18	10	8	0.133212	4.86171	4.68518	6.50295	6.33029	35.5	26.4	No	32.3969	24.6189	28.0758	-0.407323	0.246482	2.75699	2.83855e-06	4.17045e-05	-0.160841	-0.653805	GC_LAR	Ifitm6	interferon induced transmembrane protein 6	213002
ENSMUSG00000026896	18	18	10	8	0.0924341	11.946	12.0629	11.9397	12.1103	4321.75	4745.2	No	3911.4	4387.83	4176.08	0.164893	0.119393	1.89946	0.00125601	0.0103808	0.284285	0.0455001	FLT_LAR	Ifih1	interferon induced with helicase C domain 1	71586
ENSMUSG00000034168	18	18	10	8	0.093039	10.6079	10.7259	10.6404	10.8093	1652.5	1917.5	No	1539.38	1765.71	1665.12	0.197037	0.149449	1.72945	0.00331279	0.0241874	0.346487	0.0475876	FLT_LAR	Irf2bpl	interferon regulatory factor 2 binding protein-like	238330
ENSMUSG00000021356	18	18	10	8	0.120894	9.80205	9.52161	9.98318	9.59554	1065.12	767.5	No	968.695	736.134	839.495	-0.397554	0.21193	3.54461	1.74644e-09	3.94585e-08	-0.185624	-0.609484	GC_LAR	Irf4	interferon regulatory factor 4	16364
ENSMUSG00000029771	18	18	10	8	0.120702	9.00359	8.89989	9.21641	9.07926	604.625	502.2	No	540.437	473.592	503.301	-0.195783	0.155671	1.59163	0.00687051	0.045157	-0.0401125	-0.351454	GC_LAR	Irf5	interferon regulatory factor 5	27056
ENSMUSG00000034459	18	18	10	8	0.135635	8.67924	8.92938	8.84363	9.17466	446.625	647.6	No	400.359	578.172	499.144	0.529071	0.302849	2.99882	3.52669e-07	5.9607e-06	0.83192	0.226222	FLT_LAR	Ifit1	interferon-induced protein with tetratricopeptide repeats 1	15957
ENSMUSG00000039236	18	18	10	8	0.108306	9.2605	9.16466	9.44401	9.3143	693.375	621.6	No	636.306	569.379	599.125	-0.159883	0.13083	1.49994	0.0108548	0.0666517	-0.029053	-0.290712	GC_LAR	Isg20	interferon-stimulated protein	57444
ENSMUSG00000074805	18	17	10	7	0.209302	1.19821	1.129	5.57105	5.49654	3.375	1.6	No	3.13687	1.70099	2.33916	-1.03722	0.664612	2.43879	3.44623e-05	0.000410473	-0.372612	-1.70184	GC_LAR	Il1bos	interleukin 1 beta, opposite strand	329514
ENSMUSG00000026981	18	18	10	8	0.114148	11.463	11.6259	11.454	11.6886	3080.62	3602.2	No	2799.93	3364.69	3113.68	0.264822	0.191766	1.89198	0.00131297	0.0108007	0.456588	0.0730565	FLT_LAR	Il1rn	interleukin 1 receptor antagonist	16181
ENSMUSG00000026072	18	18	10	8	0.0844821	10.2849	10.3918	10.3371	10.4896	1344	1463.8	No	1230.62	1376.07	1311.43	0.158777	0.105028	2.27811	0.000109325	0.00116074	0.263805	0.0537491	FLT_LAR	Il1r1	interleukin 1 receptor, type I	16177
ENSMUSG00000026069	18	18	10	8	0.194508	7.45282	7.58073	7.89653	8.05758	186.25	244.3	No	173.127	234.976	207.488	0.44055	0.339921	1.65559	0.00492849	0.0338419	0.780472	0.100629	FLT_LAR	Il1rl1	interleukin 1 receptor-like 1	17082
ENSMUSG00000016529	18	17	9	8	0.131034	2.84466	2.75484	5.86557	5.74984	9.75	6.7	No	8.30445	6.16132	7.11382	-0.489826	0.41539	1.45395	0.01354	0.0804903	-0.0744357	-0.905216	GC_LAR	Il10	interleukin 10	16153
ENSMUSG00000032089	18	18	10	8	0.0978839	8.70145	8.54576	8.96706	8.76428	482.5	384.3	No	444.651	368.459	402.322	-0.276462	0.167912	2.72804	3.60382e-06	5.1961e-05	-0.10855	-0.444375	GC_LAR	Il10ra	interleukin 10 receptor, alpha	16154
ENSMUSG00000004296	18	18	10	8	0.166667	4.12759	3.94596	6.24415	6.0651	22.625	14.9	No	21.9524	14.351	17.7294	-0.616877	0.389899	2.51625	1.92575e-05	0.000242787	-0.226978	-1.00678	GC_LAR	Il12b	interleukin 12b	16160
ENSMUSG00000020383	18	16	8	8	0.228916	2.08748	1.90835	5.77627	5.52027	7.125	2.6	No	6.75645	2.44997	4.36396	-1.45435	0.624571	5.48911	2.22045e-16	9.41863e-15	-0.829778	-2.07892	GC_LAR	Il13	interleukin 13	16163
ENSMUSG00000031712	18	18	10	8	0.0925141	9.36701	9.10953	9.58023	9.23019	724.125	576.2	No	718.64	571.425	636.854	-0.330135	0.253479	1.70539	0.00377641	0.0270616	-0.0766559	-0.583614	GC_LAR	Il15	interleukin 15	16168
ENSMUSG00000001741	18	18	10	8	0.0898001	9.63256	9.51279	9.78907	9.62204	869.875	755.1	No	825.173	725.957	770.053	-0.186163	0.138025	1.82585	0.00192985	0.0151456	-0.0481376	-0.324188	GC_LAR	Il16	interleukin 16	16170
ENSMUSG00000015966	18	18	10	8	0.0802947	7.28318	7.1144	7.85154	7.65308	165.125	139.4	No	167.007	136.744	150.194	-0.2797	0.179687	2.43605	3.51672e-05	0.00041849	-0.100013	-0.459386	GC_LAR	Il17rb	interleukin 17 receptor B	50905
ENSMUSG00000043088	18	18	10	8	0.0845879	9.95464	10.0621	10.0279	10.1779	1025.62	1165.6	No	978.049	1099.5	1045.52	0.168421	0.115289	2.12418	0.000309177	0.00297187	0.283709	0.0531323	FLT_LAR	Il17re	interleukin 17 receptor E	57890
ENSMUSG00000026070	18	18	10	8	0.086617	7.24119	7.14496	7.79839	7.68735	169.125	146.4	No	157.421	139.977	147.73	-0.184902	0.137287	1.82249	0.00196729	0.015389	-0.047615	-0.322188	GC_LAR	Il18r1	interleukin 18 receptor 1	16182
ENSMUSG00000031304	18	18	10	8	0.111279	8.80906	8.67423	9.05364	8.87768	536	429.4	No	480.14	405.395	438.615	-0.249347	0.182186	1.88647	0.00135638	0.0111195	-0.0671605	-0.431533	GC_LAR	Il2rg	interleukin 2 receptor, gamma chain	16186
ENSMUSG00000027718	18	11	4	7	0.405405	1.03695	0.877155	5.6153	5.33118	3.75	0.7	No	4.36258	0.767676	2.36541	-2.53375	1.02478	6.09086	2.22045e-16	9.41863e-15	-1.50897	-3.55853	GC_LAR	Il21	interleukin 21	60505
ENSMUSG00000037157	18	18	10	8	0.0766005	10.8612	11.0189	10.8739	11.0998	1943.62	2236.2	No	1828.63	2153.87	2009.32	0.235134	0.133532	3.07968	1.69328e-07	3.00079e-06	0.368666	0.101602	FLT_LAR	Il22ra1	interleukin 22 receptor, alpha 1	230828
ENSMUSG00000030748	18	18	10	8	0.0784005	10.8855	11.0292	10.9017	11.1069	1999.5	2269	No	1851.21	2159.22	2022.33	0.220304	0.111821	3.8589	5.61904e-11	1.50331e-09	0.332125	0.108483	FLT_LAR	Il4ra	interleukin 4 receptor, alpha	16190
ENSMUSG00000005364	18	18	10	8	0.160209	6.10004	5.87012	7.10849	6.87602	89.625	62.5	No	78.7901	59.7475	68.2109	-0.411075	0.32131	1.6539	0.00497257	0.0341267	-0.0897654	-0.732385	GC_LAR	Il5ra	interleukin 5 receptor, alpha	16192
ENSMUSG00000003882	18	18	10	8	0.118651	8.11257	7.95664	8.47717	8.28165	325.75	255.2	No	303.265	244.075	270.381	-0.318263	0.197814	2.60587	9.62074e-06	0.000128696	-0.120449	-0.516077	GC_LAR	Il7r	interleukin 7 receptor	16197
ENSMUSG00000020279	18	18	10	8	0.110513	6.79414	6.61362	7.51959	7.31942	127	102.9	No	121.076	98.0123	108.263	-0.304816	0.233044	1.71864	0.00351425	0.0254514	-0.0717721	-0.53786	GC_LAR	Il9r	interleukin 9 receptor	16199
ENSMUSG00000032251	18	18	10	8	0.0952381	6.81277	6.71485	7.50523	7.39665	126.25	113.2	No	116.182	103.64	109.214	-0.171447	0.126402	1.88215	0.00139134	0.0113707	-0.0450448	-0.297849	GC_LAR	Irak1bp1	interleukin-1 receptor-associated kinase 1 binding protein 1	65099
ENSMUSG00000060477	18	18	10	8	0.0822805	10.7817	10.6401	10.8765	10.6745	1909.75	1669.8	No	1809.37	1569.17	1675.93	-0.205466	0.0718676	8.20578	2.22045e-16	9.41863e-15	-0.133598	-0.277333	GC_LAR	Irak2	interleukin-1 receptor-associated kinase 2	108960
ENSMUSG00000020227	18	18	10	8	0.0953335	8.52793	8.46204	8.7975	8.71163	404.375	375.1	No	376.503	349.532	361.519	-0.107874	0.0868524	1.5488	0.00853046	0.054505	-0.0210211	-0.194726	GC_LAR	Irak3	interleukin-1 receptor-associated kinase 3	73914
ENSMUSG00000032343	18	14	6	8	0.194444	1.02833	0.907597	5.62987	5.37869	3.375	0.9	No	3.62001	0.932019	2.12668	-1.96839	0.756728	7.08035	2.22045e-16	9.41863e-15	-1.21166	-2.72512	GC_LAR	Impg1	interphotoreceptor matrix proteoglycan 1	63859
ENSMUSG00000007867	18	18	10	8	0.105737	9.31357	9.20354	9.49547	9.34589	711.875	640.1	No	660.383	586.576	619.379	-0.169573	0.13823	1.5107	0.0102993	0.0637318	-0.0313429	-0.307804	GC_LAR	Ift43	intraflagellar transport 43	76411
ENSMUSG00000037679	18	18	10	8	0.113345	9.65761	9.43687	9.83133	9.53316	886.375	703.4	No	945.957	680.796	798.646	-0.472719	0.258854	3.35721	1.18735e-08	2.44912e-07	-0.213865	-0.731572	GC_LAR	Inf2	inverted formin, FH2 and WH2 domain containing	70435
ENSMUSG00000019762	18	18	10	8	0.0893325	9.08499	9.30652	9.20337	9.50613	608.75	695.1	No	554.306	661.833	614.043	0.253732	0.206927	1.49325	0.0112135	0.0685504	0.460659	0.0468043	FLT_LAR	Iyd	iodotyrosine deiodinase	70337
ENSMUSG00000040797	18	18	10	8	0.125483	6.2056	6.32858	7.07748	7.20514	73.375	96.7	No	72.8032	85.7458	79.9936	0.264626	0.212214	1.5418	0.00883353	0.0561278	0.47684	0.052412	FLT_LAR	Iqsec3	IQ motif and Sec7 domain 3	243621
ENSMUSG00000030536	18	18	10	8	0.0829556	14.623	14.7203	14.6002	14.7439	26802.6	29625	No	24925.3	27517.4	26365.4	0.142648	0.0898327	2.51152	1.99645e-05	0.000250618	0.232481	0.0528157	FLT_LAR	Iqgap1	IQ motif containing GTPase activating protein 1	29875
ENSMUSG00000044792	18	18	10	8	0.0827816	11.7321	11.7942	11.7458	11.8364	3653.88	3798.2	No	3377.56	3590.04	3495.61	0.0863819	0.0696314	1.53626	0.00908039	0.0575018	0.156013	0.0167505	FLT_LAR	Isca1	iron-sulfur cluster assembly 1	69046
ENSMUSG00000031734	18	17	9	8	0.162162	2.06526	1.96588	5.73483	5.59494	5	3.4	No	6.2792	3.2127	4.57559	-0.757725	0.572545	1.96058	0.000869564	0.00753002	-0.18518	-1.33027	GC_LAR	Irx3	Iroquois related homeobox 3	16373
ENSMUSG00000041681	18	18	10	8	0.192857	2.72443	2.88543	5.7135	5.89516	5.375	9.7	No	5.19835	9.8302	7.7716	0.917917	0.514759	3.11267	1.24864e-07	2.2569e-06	1.43268	0.403158	FLT_LAR	Iapp	islet amyloid polypeptide	15874
ENSMUSG00000039662	18	18	10	8	0.0881886	11.3935	11.5326	11.3934	11.5955	2951	3303.2	No	2659.1	3043.78	2872.81	0.193486	0.118491	2.65387	6.57375e-06	9.03255e-05	0.311977	0.0749947	FLT_LAR	Icmt	isoprenylcysteine carboxyl methyltransferase	57295
ENSMUSG00000074766	18	18	10	8	0.104604	7.12417	7.28659	7.64872	7.84112	144.5	179.8	No	135.365	165.185	151.932	0.282092	0.168794	2.78644	2.22113e-06	3.31895e-05	0.450887	0.113298	FLT_LAR	Ism1	isthmin 1, angiogenesis inhibitor	319909
ENSMUSG00000027007	18	18	10	8	0.0757031	12.6793	12.7968	12.6631	12.8337	6631	7589	No	6473.8	7343.26	6956.84	0.18205	0.126152	2.07121	0.000435586	0.00406367	0.308202	0.0558984	FLT_LAR	Itprid2	ITPR interacting domain containing 2	70599
ENSMUSG00000024384	18	18	10	8	0.0856082	11.6075	11.6683	11.6243	11.7129	3348.88	3515.4	No	3097.58	3287.79	3203.25	0.0839798	0.065033	1.66639	0.00465451	0.0322894	0.149013	0.0189467	FLT_LAR	Iws1	IWS1, SUPT6 interacting protein	73473
ENSMUSG00000037315	18	18	10	8	0.0917444	9.45371	9.54376	9.57068	9.69501	760.125	817.6	No	694.346	759.614	730.606	0.125548	0.0947295	1.75753	0.00283769	0.0211652	0.220277	0.0308184	FLT_LAR	Jade3	jade family PHD finger 3	382207
ENSMUSG00000046380	18	18	10	8	0.0757121	8.6652	8.79312	8.8654	9.03384	406.25	475.4	No	402.455	457.579	433.079	0.189077	0.137222	1.88663	0.00135512	0.0111126	0.326298	0.0518553	FLT_LAR	Jrk	jerky	16469
ENSMUSG00000052837	18	18	10	8	0.0938166	10.8074	10.6861	10.8942	10.7218	1936	1784.3	No	1866.75	1639.34	1740.41	-0.186897	0.143059	1.7137	0.00361005	0.026054	-0.043838	-0.329957	GC_LAR	Junb	jun B proto-oncogene	16477
ENSMUSG00000001552	18	18	10	8	0.0913603	13.0883	13.2079	13.0684	13.2405	9179.88	10729.6	No	8528.13	9825.33	9248.8	0.20423	0.126544	2.58933	1.09537e-05	0.000144978	0.330774	0.077686	FLT_LAR	Jup	junction plakoglobin	16480
ENSMUSG00000042686	18	18	10	8	0.0860395	7.2084	7.33078	7.71911	7.86407	155	174.7	No	145.107	166.399	156.936	0.18655	0.132898	1.96513	0.000845789	0.00735076	0.319448	0.0536525	FLT_LAR	Jph1	junctophilin 1	57339
ENSMUSG00000020918	18	18	10	8	0.0941414	9.87432	10.0291	9.9389	10.1566	1017.62	1165.9	No	931.371	1083.12	1015.68	0.215388	0.148523	2.09268	0.000379455	0.00358709	0.363911	0.0668642	FLT_LAR	Kat2a	K(lysine) acetyltransferase 2A	14534
ENSMUSG00000061751	18	18	10	8	0.0752925	11.3365	11.4229	11.3533	11.4781	2675.38	2935.9	No	2562.1	2796.21	2692.16	0.126247	0.0957024	1.73384	0.00323401	0.0236978	0.221949	0.0305441	FLT_LAR	Kalrn	kalirin, RhoGEF kinase	545156
ENSMUSG00000066513	18	18	10	8	0.178333	5.61926	5.85827	6.70902	6.97441	56.25	75	No	47.0171	72.7597	61.3186	0.606293	0.383853	2.46298	2.87858e-05	0.000349187	0.990147	0.22244	FLT_LAR	Klk1b4	kallikrein 1-related pepidase b4	18048
ENSMUSG00000044485	18	14	8	6	0.595238	2.25542	2.32867	5.57397	5.65103	4	9.4	No	3.38717	10.5816	2.54555	-0.904636	0.678664	1.86774	0.0015141	0.0122521	-0.225972	-1.5833	GC_LAR	Klk1b11	kallikrein 1-related peptidase b11	16613
ENSMUSG00000038968	18	16	9	7	0.210526	1.93749	1.84079	5.68975	5.57062	5.5	3.2	No	5.41708	2.8727	4.00354	-0.819156	0.604792	1.86599	0.00152969	0.0123593	-0.214364	-1.42395	GC_LAR	Klk1b16	kallikrein 1-related peptidase b16	16615
ENSMUSG00000063713	18	18	10	8	0.710145	2.58722	2.63044	5.6661	5.79087	4.375	17.2	No	3.97158	19.6983	3.09787	-0.717379	0.527642	1.89718	0.00127311	0.0105024	-0.189736	-1.24502	GC_LAR	Klk1b24	kallikrein 1-related peptidase b24	16617
ENSMUSG00000066512	18	18	10	8	0.593414	5.21472	5.77116	6.41184	6.92139	30	124.8	No	27.9041	138.196	32.3744	0.374978	0.245233	2.33133	7.51742e-05	0.000827892	0.620212	0.129745	FLT_LAR	Klk1b5	kallikrein 1-related peptidase b5	16622
ENSMUSG00000063089	18	11	6	5	0.512821	0.763792	0.843151	5.38404	5.46714	1.125	3	No	0.980892	3.23745	2.23454	1.59896	1.17752	1.82053	0.00198947	0.0155301	2.77648	0.421442	FLT_LAR	Klk1b8	kallikrein 1-related peptidase b8	16624
ENSMUSG00000109764	18	18	10	8	0.351955	3.16847	2.93268	5.99701	5.7665	14.875	6	No	15.607	6.32349	10.4495	-1.3243	0.603555	4.78623	4.44089e-16	1.85973e-14	-0.72075	-1.92786	GC_LAR	Klkb1	kallikrein B, plasma 1	16621
ENSMUSG00000054046	18	18	10	8	0.110092	2.54991	2.44749	5.8323	5.69232	7.125	5.2	No	7.37712	4.74526	5.91498	-0.542049	0.444496	1.51478	0.0100953	0.0626763	-0.0975528	-0.986546	GC_LAR	Klk13	kallikrein related-peptidase 13	626834
ENSMUSG00000025213	18	18	10	8	0.0923841	7.32188	7.21608	7.86116	7.73499	181.25	157	No	168.706	146.785	156.528	-0.201275	0.158059	1.62821	0.00568927	0.0383057	-0.0432161	-0.359334	GC_LAR	Kazald1	Kazal-type serine peptidase inhibitor domain 1	107250
ENSMUSG00000010830	18	18	10	8	0.125482	9.30083	9.13119	9.49559	9.26776	801.25	630.9	No	723.523	571.676	639.163	-0.33909	0.282425	1.45083	0.0137421	0.0814723	-0.056665	-0.621516	GC_LAR	Kdelr3	KDEL (Lys-Asp-Glu-Leu) endoplasmic reticulum protein retention receptor 3	105785
ENSMUSG00000051890	18	18	10	8	0.109234	7.79744	7.66163	8.22227	8.05574	258.125	213.7	No	233.249	198.136	213.741	-0.244794	0.124708	3.89473	3.73086e-11	1.01466e-09	-0.120086	-0.369502	GC_LAR	Klhdc1	kelch domain containing 1	271005
ENSMUSG00000078234	18	18	10	8	0.0985992	10.1932	10.314	10.2466	10.4182	1234.75	1403.7	No	1163.96	1305.77	1242.74	0.164336	0.127275	1.66099	0.0047897	0.0330962	0.291611	0.0370607	FLT_LAR	Klhdc7a	kelch domain containing 7A	242721
ENSMUSG00000055675	18	18	10	8	0.0872182	10.6264	10.7347	10.6614	10.8169	1691.75	1836.3	No	1561.18	1747.73	1664.82	0.160921	0.112059	2.05408	0.000485866	0.00447088	0.272981	0.048862	FLT_LAR	Kbtbd11	kelch repeat and BTB (POZ) domain containing 11	74901
ENSMUSG00000022076	18	18	10	8	0.224719	2.08641	2.22672	5.60036	5.76197	2.75	6.7	No	2.9727	6.34811	4.84793	1.23559	0.5374	5.23398	2.22045e-16	9.41863e-15	1.77299	0.698192	FLT_LAR	Klhl1	kelch-like 1	93688
ENSMUSG00000042514	18	18	10	8	0.166253	4.39122	4.24219	6.32027	6.17432	26.75	18.9	No	24.5433	17.6618	20.7202	-0.471065	0.291915	2.62337	8.37986e-06	0.000113191	-0.17915	-0.76298	GC_LAR	Klhl14	kelch-like 14	225266
ENSMUSG00000073700	18	18	10	8	0.096181	10.0463	10.1444	10.1154	10.2526	1142.12	1283.2	No	1044.68	1169.3	1113.91	0.160748	0.132405	1.47012	0.012536	0.0754769	0.293154	0.0283431	FLT_LAR	Klhl21	kelch-like 21	242785
ENSMUSG00000040387	18	18	10	8	0.0859058	7.96365	8.03264	8.30072	8.38735	258	286	No	246.33	266.447	257.506	0.122436	0.0876186	1.94734	0.000942521	0.00807932	0.210055	0.0348178	FLT_LAR	Klhl32	kelch-like 32	212390
ENSMUSG00000043008	18	18	10	8	0.105927	7.94458	7.76936	8.34758	8.13132	285.375	223.9	No	262.435	213.87	235.455	-0.303527	0.157678	3.73106	2.35153e-10	5.92932e-09	-0.145849	-0.461205	GC_LAR	Klhl6	kelch-like 6	239743
ENSMUSG00000054146	18	18	10	8	0.109034	3.99021	4.11302	6.08749	6.21084	15.25	19.9	No	14.6751	19.1993	17.1885	0.377557	0.275579	1.86748	0.00151641	0.0122632	0.653136	0.101978	FLT_LAR	Krt15	keratin 15	16665
ENSMUSG00000035557	18	18	10	8	0.137991	7.50342	7.10108	8.07405	7.60065	235.5	155.1	No	218.995	139.501	174.831	-0.648795	0.336778	3.74386	2.04177e-10	5.18305e-09	-0.312018	-0.985573	GC_LAR	Krt17	keratin 17	16667
ENSMUSG00000035849	18	18	10	8	0.118182	5.50772	5.38067	6.7686	6.64505	55.75	43.4	No	48.9241	40.4254	44.2026	-0.307128	0.196484	2.5119	1.99055e-05	0.000249997	-0.110644	-0.503612	GC_LAR	Krt222	keratin 222	268481
ENSMUSG00000020916	18	18	10	8	0.228771	5.38484	5.57898	6.62816	6.82862	42.5	66.1	No	40.6838	63.6874	53.4636	0.651157	0.426537	2.27606	0.000110904	0.00117513	1.07769	0.224621	FLT_LAR	Krt36	keratin 36	16673
ENSMUSG00000064165	18	12	5	7	0.1875	-0.207904	-0.24793	5.45746	5.32659	1.25	0.6	No	1.43605	0.530602	0.933025	-1.18079	0.974801	1.55559	0.0082457	0.0528782	-0.205992	-2.1556	GC_LAR	Krt39	keratin 39	237934
ENSMUSG00000061527	18	15	8	7	0.152174	1.42583	1.29222	5.64287	5.45596	3.625	1.7	No	5.15111	1.49878	3.12204	-1.50035	0.756342	4.14513	1.92735e-12	5.83955e-11	-0.744009	-2.25669	GC_LAR	Krt5	keratin 5	110308
ENSMUSG00000061397	18	18	10	8	0.118644	1.7868	1.66968	5.70985	5.55095	4.375	2.4	No	5.38116	2.32398	3.68272	-1.0275	0.56943	3.50954	2.51881e-09	5.59479e-08	-0.458068	-1.59693	GC_LAR	Krt79	keratin 79	223917
ENSMUSG00000037185	18	18	10	8	0.0936533	6.1744	5.9701	7.14842	6.93111	80.125	65.1	No	79.7023	60.8374	69.2218	-0.373158	0.210431	3.15664	8.28084e-08	1.53689e-06	-0.162727	-0.583588	GC_LAR	Krt80	keratin 80	74127
ENSMUSG00000067613	18	18	10	8	0.12766	4.87666	5.17947	6.34518	6.65468	30.75	45.9	No	26.5563	41.4733	34.8435	0.606854	0.297263	4.17468	1.34293e-12	4.14526e-11	0.904117	0.309592	FLT_LAR	Krt83	keratin 83	100126226
ENSMUSG00000044294	18	18	10	8	0.185861	5.25502	5.41582	6.57439	6.73422	40.875	55	No	37.572	51.0265	45.0467	0.447622	0.359927	1.52716	0.00949879	0.0596625	0.807549	0.0876944	FLT_LAR	Krt84	keratin 84	16680
ENSMUSG00000067750	18	18	10	8	0.213992	3.665	3.39416	6.14249	5.86107	19.125	9	No	16.8524	8.60556	12.2708	-1.00658	0.382676	7.01481	2.22045e-16	9.41863e-15	-0.6239	-1.38925	GC_LAR	Khdc1a	KH domain containing 1A	368204
ENSMUSG00000050241	18	18	10	8	0.105882	3.2265	3.06898	5.99407	5.8126	11.75	7.6	No	11.6759	7.36577	9.28139	-0.664932	0.388964	2.93452	6.23895e-07	1.01345e-05	-0.275969	-1.0539	GC_LAR	Klre1	killer cell lectin-like receptor family E member 1	243655
ENSMUSG00000067610	18	18	10	8	0.126394	3.93172	3.7603	6.18713	6.01195	18	12.5	No	18.3075	12.447	15.0517	-0.534297	0.309904	3.03226	2.60949e-07	4.49423e-06	-0.224393	-0.844202	GC_LAR	Klri1	killer cell lectin-like receptor family I member 1	503550
ENSMUSG00000079298	18	18	10	8	0.108262	7.0165	6.83429	7.66541	7.45888	155	121.7	No	139.873	112.576	124.708	-0.319184	0.199593	2.58229	1.15724e-05	0.000152374	-0.11959	-0.518777	GC_LAR	Klrb1b	killer cell lectin-like receptor subfamily B member 1B	80782
ENSMUSG00000030325	18	18	10	8	0.122555	5.34778	5.25148	6.69027	6.59248	47	39.1	No	43.9539	36.9684	40.0731	-0.251678	0.193858	1.69137	0.00407303	0.0288569	-0.0578193	-0.445536	GC_LAR	Klrb1c	killer cell lectin-like receptor subfamily B member 1C	17059
ENSMUSG00000071537	18	18	10	8	0.105376	4.67132	4.50779	6.42869	6.26654	29.5	22.9	No	28.3277	21.4423	24.5025	-0.379889	0.215484	3.12574	1.10583e-07	2.01541e-06	-0.164405	-0.595373	GC_LAR	Klrg2	killer cell lectin-like receptor subfamily G, member 2	74253
ENSMUSG00000014543	18	17	10	7	0.121495	2.40418	2.3185	5.74966	5.6798	7.25	4.9	No	6.31071	4.27107	5.17758	-0.596508	0.416452	2.20914	0.000175598	0.00178509	-0.180055	-1.01296	GC_LAR	Klra17	killer cell lectin-like receptor, subfamily A, member 17	170733
ENSMUSG00000067591	18	14	8	6	0.142857	1.2892	1.3826	5.44612	5.5915	1.75	3.5	No	1.43219	3.69536	2.68951	1.19005	0.753009	2.50899	2.03514e-05	0.000254867	1.94306	0.437042	FLT_LAR	Klra3	killer cell lectin-like receptor, subfamily A, member 3	16634
ENSMUSG00000062960	18	18	10	8	0.0908404	10.5062	10.636	10.5404	10.726	1582.75	1778.7	No	1445.95	1640.68	1554.13	0.180824	0.139488	1.67356	0.00448035	0.0312295	0.320313	0.0413362	FLT_LAR	Kdr	kinase insert domain protein receptor	16542
ENSMUSG00000021843	18	18	10	8	0.0806827	11.7307	11.8386	11.7323	11.8892	3601.88	3956.4	No	3349.1	3727.41	3559.27	0.152626	0.074619	4.1691	1.43796e-12	4.42821e-11	0.227245	0.0780071	FLT_LAR	Ktn1	kinectin 1	16709
ENSMUSG00000021375	18	18	10	8	0.0906897	12.5074	12.6332	12.4887	12.6746	6330.5	7079.2	No	5818.68	6515.35	6205.72	0.162712	0.135718	1.43106	0.0150842	0.0881164	0.298429	0.0269942	FLT_LAR	Kif13a	kinesin family member 13A	16553
ENSMUSG00000060012	18	18	10	8	0.0805826	13.7499	13.9665	13.6957	14.0163	14071.4	17435.2	No	13530.4	16675.5	15277.7	0.301484	0.14133	4.50761	1.93179e-14	7.02685e-13	0.442815	0.160154	FLT_LAR	Kif13b	kinesin family member 13B	16554
ENSMUSG00000041498	18	18	10	8	0.125074	8.02457	7.79553	8.42878	8.14224	318.25	255.5	No	295.753	226.551	257.307	-0.381578	0.282618	1.83551	0.00182561	0.0143877	-0.0989596	-0.664196	GC_LAR	Kif14	kinesin family member 14	381293
ENSMUSG00000038844	18	18	10	8	0.0811469	11.8289	11.9044	11.8375	11.9469	3860.75	4141.5	No	3595.46	3890.41	3759.32	0.112725	0.0712239	2.49854	2.20299e-05	0.000274191	0.183949	0.0415013	FLT_LAR	Kif16b	kinesin family member 16B	16558
ENSMUSG00000027115	18	18	10	8	0.0983868	8.06747	7.8862	8.44956	8.22099	307.5	256.1	No	291.222	234.915	259.94	-0.303784	0.203984	2.22817	0.000154277	0.00159111	-0.0998006	-0.507768	GC_LAR	Kif18a	kinesin family member 18A	228421
ENSMUSG00000014602	18	18	10	8	0.0989695	9.71302	9.84937	9.79478	9.98486	889	1055	No	835.701	958.347	903.838	0.196788	0.159181	1.52147	0.00976906	0.0610398	0.355968	0.0376068	FLT_LAR	Kif1a	kinesin family member 1A	16560
ENSMUSG00000063077	18	18	10	8	0.0800594	12.8543	12.9651	12.8371	13.0005	7887.25	8649.1	No	7357.6	8165.47	7806.42	0.149893	0.11186	1.78825	0.00238968	0.0182427	0.261753	0.0380326	FLT_LAR	Kif1b	kinesin family member 1B	16561
ENSMUSG00000020821	18	18	10	8	0.0829258	14.0193	14.0935	14.0054	14.1139	17688.1	19156.4	No	16465.9	17784.4	17198.4	0.111001	0.0933697	1.40913	0.0167061	0.0961177	0.204371	0.0176317	FLT_LAR	Kif1c	kinesin family member 1C	16562
ENSMUSG00000030677	18	18	10	8	0.135215	8.18042	7.93987	8.55801	8.25338	384.25	298.3	No	342.625	257.08	295.1	-0.412593	0.334427	1.53385	0.00918925	0.0580654	-0.0781665	-0.74702	GC_LAR	Kif22	kinesin family member 22	110033
ENSMUSG00000026764	18	18	10	8	0.0939162	8.89857	9.07547	9.05101	9.29044	522.625	615.8	No	470.307	563.085	521.85	0.25394	0.15398	2.71055	4.15841e-06	5.92106e-05	0.40792	0.0999605	FLT_LAR	Kif5c	kinesin family member 5C	16574
ENSMUSG00000024301	18	18	10	8	0.0863309	6.65354	6.5137	7.42329	7.26265	105.75	96.1	No	111.644	90.2656	99.767	-0.277762	0.221621	1.58761	0.00701287	0.0459356	-0.0561409	-0.499382	GC_LAR	Kifc5b	kinesin family member C5B	16580
ENSMUSG00000104667	18	18	10	8	0.121053	5.26778	5.10835	6.66583	6.51131	48	37.6	No	42.4145	33.1945	37.2923	-0.363639	0.233823	2.50257	2.13683e-05	0.00026646	-0.129816	-0.597463	GC_LAR	Gm4961	kinesin superfamily protein 2C pseudogene	242914
ENSMUSG00000027326	18	18	10	8	0.112461	9.44883	9.29936	9.6261	9.42311	804.75	690	No	760.741	629.77	687.979	-0.270456	0.211238	1.6475	0.005143	0.0350858	-0.0592188	-0.481694	GC_LAR	Knl1	kinetochore scaffold 1	76464
ENSMUSG00000027331	18	18	10	8	0.126949	9.07615	8.7635	9.33274	8.91651	684.625	491.3	No	621.936	433.563	517.285	-0.519112	0.267573	3.79473	1.15941e-10	3.01e-09	-0.251539	-0.786686	GC_LAR	Knstrn	kinetochore-localized astrin/SPAG5 binding	51944
ENSMUSG00000022875	18	18	10	8	0.495441	4.70128	3.93751	6.62798	5.94469	66.875	12.3	No	68.3707	12.3713	37.2599	-2.47398	0.712992	11.5056	2.22045e-16	9.41863e-15	-1.76098	-3.18697	GC_LAR	Kng1	kininogen 1	16644
ENSMUSG00000041734	18	18	10	8	0.0865412	9.72611	9.87498	9.8043	10.0122	888.125	1027.4	No	834.531	964.92	906.969	0.20812	0.114186	3.30489	1.99237e-08	3.98539e-07	0.322306	0.0939339	FLT_LAR	Kirrel	kirre like nephrin family adhesion molecule 1	170643
ENSMUSG00000030265	18	18	10	8	0.0794302	12.1805	12.2566	12.1826	12.2934	4908.5	5262.4	No	4589.19	4972.87	4802.35	0.115494	0.0787378	2.14493	0.000269769	0.00263742	0.194232	0.0367566	FLT_LAR	Kras	Kirsten rat sarcoma viral oncogene homolog	16653
ENSMUSG00000030087	18	18	10	8	0.218761	8.03238	8.0661	8.36563	8.41	289.5	352.6	No	271.978	352.118	244.983	-0.282998	0.199608	2.02231	0.000593689	0.00535256	-0.0833903	-0.482606	GC_LAR	Klf15	Kruppel-like factor 15	66277
ENSMUSG00000041649	18	18	10	8	0.0894226	6.71767	6.62254	7.44483	7.33927	115.875	103	No	108.954	97.5261	102.605	-0.158668	0.133671	1.41561	0.0162117	0.0938687	-0.0249963	-0.292339	GC_LAR	Klf8	Kruppel-like factor 8	245671
ENSMUSG00000079056	18	18	10	8	0.0907643	6.51393	6.63465	7.25581	7.39067	97	110.8	No	88.9884	102.484	96.486	0.186153	0.120615	2.4473	3.23542e-05	0.000388354	0.306768	0.0655378	FLT_LAR	Kcnip3	Kv channel interacting protein 3, calsenilin	56461
ENSMUSG00000029088	18	18	10	8	0.101391	8.35929	8.49667	8.60318	8.78225	358.25	410.7	No	323.516	377.925	353.743	0.219894	0.161062	1.85957	0.00158808	0.0127386	0.380957	0.0588324	FLT_LAR	Kcnip4	Kv channel interacting protein 4	80334
ENSMUSG00000053519	18	18	10	8	0.117395	6.67586	6.96106	7.31817	7.63962	107	147.8	No	97.0225	135.295	118.285	0.473611	0.197313	5.71503	2.22045e-16	9.41863e-15	0.670924	0.276298	FLT_LAR	Kcnip1	Kv channel-interacting protein 1	70357
ENSMUSG00000025221	18	18	10	8	0.233933	4.17433	4.33004	6.14945	6.29404	16.125	26	No	17.7199	26.3717	22.5265	0.615471	0.457337	1.75783	0.00283291	0.0211415	1.07281	0.158134	FLT_LAR	Kcnip2	Kv channel-interacting protein 2	80906
ENSMUSG00000026866	18	18	10	8	0.115385	6.31994	6.15257	7.22356	7.04429	88.125	72.5	No	87.3881	70.834	78.1914	-0.295117	0.229313	1.6657	0.00467155	0.032399	-0.0658044	-0.52443	GC_LAR	Kynu	kynureninase	70789
ENSMUSG00000039783	18	18	10	8	0.161328	7.13915	6.82435	7.78386	7.42696	176.75	114.6	No	158.625	109.463	131.313	-0.545443	0.219895	6.21176	2.22045e-16	9.41863e-15	-0.325548	-0.765338	GC_LAR	Kmo	kynurenine 3-monooxygenase (kynurenine 3-hydroxylase)	98256
ENSMUSG00000035576	18	17	9	8	0.125	1.63601	1.5382	5.67971	5.52409	4.375	2.1	No	4.33989	2.13801	3.11662	-1.06867	0.569784	3.53469	1.93775e-09	4.35936e-08	-0.498885	-1.63845	GC_LAR	L3mbtl1	L3MBTL1 histone methyl-lysine binding protein	241764
ENSMUSG00000037331	18	18	10	8	0.0849264	12.6376	12.8045	12.6062	12.85	6924.12	8056	No	6347.05	7540.21	7009.91	0.248282	0.181606	1.85525	0.00162845	0.0130093	0.429888	0.0666768	FLT_LAR	Larp1	La ribonucleoprotein 1, translational regulator	73158
ENSMUSG00000025762	18	18	10	8	0.0890548	10.8818	10.9971	10.9053	11.0703	2053.88	2269.1	No	1861.85	2100.78	1994.59	0.172856	0.115495	2.23104	0.000151275	0.00156383	0.288351	0.0573605	FLT_LAR	Larp1b	La ribonucleoprotein 1B	214048
ENSMUSG00000097366	18	13	6	7	0.157895	0.086398	0.0377226	5.48556	5.35339	1.5	0.7	No	1.84439	0.672644	1.19342	-1.19052	0.898404	1.98835	0.000733364	0.00647641	-0.292113	-2.08892	GC_LAR	Gm8177	La ribonucleoprotein domain family, member 4 pseudogene	666585
ENSMUSG00000026354	18	18	10	8	0.292086	4.62157	4.97254	6.25712	6.58324	22.75	51.3	No	22.7273	44.9696	35.0841	1.00906	0.503596	3.84862	6.31513e-11	1.68269e-09	1.51266	0.505464	FLT_LAR	Lct	lactase	226413
ENSMUSG00000032401	18	17	9	8	0.377049	3.48327	3.05465	6.13171	5.6977	23.375	5.7	No	19.5319	5.91771	11.9684	-1.76743	0.654149	7.25948	2.22045e-16	9.41863e-15	-1.11329	-2.42158	GC_LAR	Lctl	lactase-like	235435
ENSMUSG00000041782	18	18	10	8	0.0935464	13.3165	13.5344	13.2655	13.5847	11177.2	13794.5	No	9976.47	12502.2	11379.6	0.325317	0.157863	4.20359	9.40581e-13	2.9413e-11	0.483179	0.167454	FLT_LAR	Lad1	ladinin	16763
ENSMUSG00000026840	18	18	10	8	0.094146	8.11458	8.35351	8.37642	8.683	302.375	381.6	No	277.597	349.944	317.79	0.329787	0.221146	2.20742	0.000177647	0.00180384	0.550933	0.108641	FLT_LAR	Lamc3	laminin gamma 3	23928
ENSMUSG00000032796	18	18	10	8	0.104245	7.83503	8.06307	8.15373	8.44694	240.375	314.2	No	224.553	287.934	259.765	0.355649	0.211649	2.80015	1.97988e-06	2.9839e-05	0.567298	0.144	FLT_LAR	Lama1	laminin, alpha 1	16772
ENSMUSG00000026639	18	18	10	8	0.0895045	12.4609	12.6156	12.4378	12.6602	5910.62	7115.6	No	5512.78	6613.58	6124.34	0.262535	0.155872	2.81446	1.75493e-06	2.66318e-05	0.418407	0.106663	FLT_LAR	Lamb3	laminin, beta 3	16780
ENSMUSG00000026479	18	18	10	8	0.0894147	11.2721	11.5218	11.2457	11.6065	2655.25	3332.4	No	2393.73	3098.37	2785.2	0.371186	0.141663	6.78748	2.22045e-16	9.41863e-15	0.512849	0.229523	FLT_LAR	Lamc2	laminin, gamma 2	16782
ENSMUSG00000047344	18	18	10	8	0.0977011	6.12517	6.20123	7.04069	7.11979	71.375	82.1	No	68.5538	75.9118	72.6416	0.170937	0.138692	1.51518	0.0100755	0.0625683	0.309629	0.0322444	FLT_LAR	Lancl3	LanC lantibiotic synthetase component C-like 3 (bacterial)	236285
ENSMUSG00000040021	18	18	10	8	0.0886028	12.2139	12.2914	12.2145	12.3281	5133.75	5424.3	No	4712.9	5085.99	4920.17	0.108875	0.0844911	1.65637	0.00490807	0.0337457	0.193366	0.0243837	FLT_LAR	Lats1	large tumor suppressor	16798
ENSMUSG00000021959	18	18	10	8	0.0830743	10.7318	10.8145	10.7698	10.8888	1811.38	1961.1	No	1682.28	1828.63	1763.58	0.11807	0.0786274	2.25198	0.000131029	0.00137152	0.196697	0.0394425	FLT_LAR	Lats2	large tumor suppressor 2	50523
ENSMUSG00000004383	18	18	10	8	0.0759488	10.0455	10.1069	10.1249	10.2114	1101.25	1179.6	No	1047.7	1117.42	1086.44	0.0933946	0.0779604	1.43144	0.0150569	0.0879766	0.171355	0.0154341	FLT_LAR	Large1	LARGE xylosyl- and glucuronyltransferase 1	16795
ENSMUSG00000057421	18	18	10	8	0.0886034	10.2101	10.2994	10.2719	10.3982	1282.12	1387.3	No	1171.37	1283.86	1233.86	0.128773	0.0920109	1.95839	0.000881282	0.00761895	0.220784	0.0367624	FLT_LAR	Las1l	LAS1-like (S. cerevisiae)	76130
ENSMUSG00000032258	18	18	10	8	0.0832466	7.32755	7.16693	7.87878	7.68922	175.125	148.2	No	169.076	140.195	153.031	-0.262216	0.125289	4.39824	8.06022e-14	2.74936e-12	-0.136928	-0.387505	GC_LAR	Lca5	Leber congenital amaurosis 5 (human)	75782
ENSMUSG00000035237	18	18	10	8	0.504144	4.55314	4.64354	6.29518	6.44282	24.875	52.5	No	25.8273	59.5096	21.3412	-0.545607	0.418146	1.70572	0.00376982	0.027029	-0.127461	-0.963752	GC_LAR	Lcat	lecithin cholesterol acyltransferase	16816
ENSMUSG00000068220	18	18	10	8	0.128666	12.1993	12.0347	12.2601	12.0223	5527.75	4561.5	No	4994.23	4163.17	4532.53	-0.262652	0.167428	2.47451	2.6405e-05	0.00032343	-0.095224	-0.430079	GC_LAR	Lgals1	lectin, galactose binding, soluble 1	16852
ENSMUSG00000024972	18	18	10	8	0.105686	10.0775	9.85002	10.2267	9.90999	1287.5	987.3	No	1158.34	907.706	1019.1	-0.352542	0.168201	4.42422	5.75096e-14	1.99794e-12	-0.184341	-0.520743	GC_LAR	Lgals12	lectin, galactose binding, soluble 12	56072
ENSMUSG00000038793	18	18	10	8	0.109217	7.72293	7.46035	8.19732	7.88166	250.875	204	No	227.815	177.117	199.649	-0.360103	0.22334	2.6232	8.39079e-06	0.00011328	-0.136763	-0.583443	GC_LAR	Lefty1	left right determination factor 1	13590
ENSMUSG00000022802	18	18	10	8	0.0879447	8.45035	8.59203	8.67901	8.86409	364.75	416.6	No	343.649	398.998	374.399	0.211783	0.128015	2.72184	3.79184e-06	5.45149e-05	0.339798	0.0837679	FLT_LAR	Lmln	leishmanolysin-like (metallopeptidase M8 family)	239833
ENSMUSG00000048661	18	18	10	8	0.0868329	10.0112	10.083	10.09	10.1911	1082.38	1174.8	No	1022.16	1101.48	1066.23	0.109307	0.084651	1.66233	0.00475573	0.0329007	0.193958	0.0246561	FLT_LAR	Lemd3	LEM domain containing 3	380664
ENSMUSG00000038970	18	18	10	8	0.0790141	12.2573	12.4168	12.2354	12.468	5139.5	5986.6	No	4789.2	5632.25	5257.56	0.23329	0.100974	5.30249	2.22045e-16	9.41863e-15	0.334265	0.132316	FLT_LAR	Lmtk2	lemur tyrosine kinase 2	231876
ENSMUSG00000042487	18	18	10	8	0.0863353	9.45946	9.62311	9.55645	9.78186	761.875	881.2	No	689.123	822.129	763.015	0.252134	0.138594	3.29031	2.29816e-08	4.54774e-07	0.390728	0.11354	FLT_LAR	Leo1	Leo1, Paf1/RNA polymerase II complex component	235497
ENSMUSG00000045045	18	18	10	8	0.096879	9.35919	9.49753	9.47082	9.66103	716	843.4	No	651.305	761.25	712.385	0.222654	0.178789	1.54399	0.00873774	0.0555998	0.401443	0.0438646	FLT_LAR	Lrfn4	leucine rich repeat and fibronectin type III domain containing 4	225875
ENSMUSG00000048988	18	18	10	8	0.244444	2.05513	2.17543	5.60631	5.74403	2.875	6.7	No	3.04969	5.81269	4.58469	1.09991	0.513108	4.6067	5.10703e-15	1.96647e-13	1.61302	0.586804	FLT_LAR	Elfn1	leucine rich repeat and fibronectin type III, extracellular 1	243312
ENSMUSG00000045083	18	18	10	8	0.111702	3.21976	3.36623	5.85821	6.00224	7.5	12.8	No	8.31761	12.2848	10.5216	0.700774	0.377578	3.4067	7.22668e-09	1.52654e-07	1.07835	0.323196	FLT_LAR	Lingo2	leucine rich repeat and Ig domain containing 2	242384
ENSMUSG00000032352	18	18	10	8	0.0810368	10.9919	11.0711	11.0212	11.1353	2184.38	2345.7	No	2018.12	2183.47	2109.98	0.112457	0.0824927	1.8548	0.00163272	0.0130322	0.19495	0.0299642	FLT_LAR	Lrrc1	leucine rich repeat containing 1	214345
ENSMUSG00000015980	18	18	10	8	0.129143	5.55987	5.3619	6.82138	6.61611	56.125	42.6	No	52.1268	38.8103	44.7287	-0.415434	0.186089	5.03391	2.22045e-16	9.41863e-15	-0.229345	-0.601523	GC_LAR	Lrrc27	leucine rich repeat containing 27	76612
ENSMUSG00000051652	18	18	10	8	0.10696	8.71076	8.89849	8.88662	9.13675	454.375	554.6	No	411.675	505.055	463.552	0.291762	0.177328	2.69062	4.88997e-06	6.88444e-05	0.469089	0.114434	FLT_LAR	Lrrc3	leucine rich repeat containing 3	237387
ENSMUSG00000090958	18	18	10	8	0.0787226	8.51691	8.67471	8.72866	8.93865	388.125	450.4	No	364.593	424.81	398.047	0.217762	0.163388	1.76758	0.00268327	0.0201967	0.38115	0.0543742	FLT_LAR	Lrrc32	leucine rich repeat containing 32	434215
ENSMUSG00000028617	18	18	10	8	0.0887853	10.9167	10.8017	10.9996	10.8344	2102.5	1900.8	No	1988.02	1763.91	1863.52	-0.170345	0.0947434	3.24315	3.63292e-08	7.02e-07	-0.0756021	-0.265089	GC_LAR	Lrrc42	leucine rich repeat containing 42	77809
ENSMUSG00000047085	18	18	10	8	0.128122	5.25444	5.48184	6.53959	6.77509	39.625	60.4	No	34.8572	52.5595	44.6918	0.577093	0.317813	3.28868	2.33513e-08	4.61422e-07	0.894906	0.25928	FLT_LAR	Lrrc4b	leucine rich repeat containing 4B	272381
ENSMUSG00000050587	18	18	10	8	0.10316	6.6742	6.79589	7.35726	7.49587	111	126.4	No	100.068	116.193	109.026	0.202529	0.167276	1.48357	0.0117508	0.0713865	0.369805	0.0352526	FLT_LAR	Lrrc4c	leucine rich repeat containing 4C	241568
ENSMUSG00000075224	18	18	10	8	0.104363	6.49566	6.28637	7.33312	7.10846	107.125	83.9	No	97.2799	75.9561	85.4334	-0.361087	0.181875	4.00349	1.05282e-11	2.99009e-10	-0.179211	-0.542962	GC_LAR	Lrrc55	leucine rich repeat containing 55	241528
ENSMUSG00000034158	18	18	10	8	0.0928828	12.7902	12.949	12.7598	12.9934	7704.62	8750.8	No	7025.85	8179.52	7666.78	0.219024	0.141711	2.37359	5.55277e-05	0.000633546	0.360735	0.0773124	FLT_LAR	Lrrc58	leucine rich repeat containing 58	320184
ENSMUSG00000067206	18	18	10	8	0.0839947	11.0216	11.1564	11.0343	11.2281	2228.75	2488.7	No	2051.71	2360.69	2223.37	0.201396	0.132534	2.2965	9.61388e-05	0.00103409	0.33393	0.0688624	FLT_LAR	Lrrc66	leucine rich repeat containing 66	231296
ENSMUSG00000023151	18	17	9	8	0.147059	1.99374	1.83801	5.76696	5.53195	5.625	2.3	No	6.07935	2.57505	4.13252	-1.28859	0.598242	4.64568	3.10862e-15	1.22203e-13	-0.690343	-1.88683	GC_LAR	Lrrc69	leucine rich repeat containing 69	73314
ENSMUSG00000046807	18	18	10	8	0.156348	6.48238	6.6351	7.23282	7.40601	91.25	117.6	No	87.2418	115.739	103.074	0.405047	0.297028	1.83571	0.00182345	0.0143793	0.702075	0.108018	FLT_LAR	Lrrc75b	leucine rich repeat containing 75B	192734
ENSMUSG00000042846	18	18	10	8	0.100872	5.22775	5.40882	6.54439	6.7295	38.625	49.4	No	34.6962	45.5083	40.7029	0.358222	0.169121	4.59434	5.9952e-15	2.29168e-13	0.527342	0.189101	FLT_LAR	Lrrtm3	leucine rich repeat transmembrane neuronal 3	216028
ENSMUSG00000052581	18	18	10	8	0.102913	4.61959	4.74301	6.30728	6.43036	24.875	31.6	No	22.933	28.6576	26.1133	0.314769	0.203538	2.46116	2.91797e-05	0.000352989	0.518306	0.111231	FLT_LAR	Lrrtm4	leucine rich repeat transmembrane neuronal 4	243499
ENSMUSG00000040367	18	18	10	8	0.116883	2.01297	1.93336	5.72404	5.60435	5.375	3.4	No	5.00067	3.26864	4.03843	-0.654299	0.498153	1.73358	0.00323874	0.0237192	-0.156147	-1.15245	GC_LAR	Lrrd1	leucine rich repeats and death domain containing 1	242838
ENSMUSG00000001089	18	18	10	8	0.0780505	13.3074	13.3912	13.294	13.4177	10662	11529.2	No	10044.4	10969.3	10558.2	0.126889	0.103907	1.48604	0.0116118	0.0706081	0.230795	0.0229819	FLT_LAR	Luzp1	leucine zipper protein 1	269593
ENSMUSG00000063297	18	18	10	8	0.100649	4.87868	4.99891	6.41476	6.53275	29.5	38	No	27.6715	34.2664	31.3354	0.32273	0.20034	2.62826	8.0611e-06	0.000109334	0.52307	0.122389	FLT_LAR	Luzp2	leucine zipper protein 2	233271
ENSMUSG00000036306	18	18	10	8	0.0955943	5.82906	5.95185	6.86109	6.99139	60.375	72	No	54.8354	65.7187	60.8817	0.249782	0.191687	1.72226	0.00344564	0.0250461	0.441468	0.058095	FLT_LAR	Lzts1	leucine zipper, putative tumor suppressor 1	211134
ENSMUSG00000005299	18	18	10	8	0.0856048	12.0596	12.1452	12.0605	12.1845	4607.88	5027	No	4223.4	4644.38	4457.27	0.136812	0.113939	1.43668	0.0146914	0.0861851	0.250751	0.0228728	FLT_LAR	Letm1	leucine zipper-EF-hand containing transmembrane protein 1	56384
ENSMUSG00000024120	18	18	10	8	0.100326	11.6243	11.8167	11.6019	11.8819	3560	4213	No	3139.68	3801.52	3507.37	0.275301	0.18139	2.28501	0.000104195	0.00111255	0.456691	0.0939105	FLT_LAR	Lrpprc	leucine-rich PPR-motif containing	72416
ENSMUSG00000036273	18	18	10	8	0.0838579	11.0128	11.1863	11.0148	11.2653	2191	2552.1	No	2043.19	2412.72	2248.49	0.238732	0.138832	2.93713	6.09726e-07	9.94121e-06	0.377564	0.0999004	FLT_LAR	Lrrk2	leucine-rich repeat kinase 2	66725
ENSMUSG00000036560	18	18	10	8	0.0863275	8.64818	8.80544	8.84092	9.0503	425.875	488.7	No	393.263	460.23	430.467	0.215825	0.104278	4.28125	3.5727e-13	1.15855e-11	0.320103	0.111548	FLT_LAR	Lgi4	leucine-rich repeat LGI family, member 4	243914
ENSMUSG00000042793	18	18	10	8	0.123656	3.11769	3.26757	5.82057	5.97245	7.5	12.6	No	7.56397	11.8316	9.93488	0.679869	0.469057	2.05972	0.000468749	0.00433602	1.14893	0.210812	FLT_LAR	Lgr6	leucine-rich repeat-containing G protein-coupled receptor 6	329252
ENSMUSG00000032913	18	18	10	8	0.0786963	10.7199	10.8061	10.7575	10.8812	1768.25	1908.3	No	1673.32	1820.72	1755.21	0.120472	0.094705	1.61309	0.00615338	0.040969	0.215177	0.0257668	FLT_LAR	Lrig2	leucine-rich repeats and immunoglobulin-like domains 2	269473
ENSMUSG00000028182	18	18	10	8	0.0931486	6.15507	5.99804	7.1228	6.95603	80.25	65.7	No	76.9293	62.0732	68.6759	-0.300942	0.176658	2.91417	7.45544e-07	1.19774e-05	-0.124284	-0.4776	GC_LAR	Lrriq3	leucine-rich repeats and IQ motif containing 3	74435
ENSMUSG00000045776	18	14	7	7	0.183673	1.60528	1.40471	5.7098	5.40875	4.875	1	No	6.27824	1.1099	3.40694	-2.49548	0.824847	9.18028	2.22045e-16	9.41863e-15	-1.67063	-3.32032	GC_LAR	Lrtm1	leucine-rich repeats and transmembrane domains 1	319476
ENSMUSG00000103409	18	17	9	8	0.117117	2.61245	2.49146	5.85105	5.68338	7.5	5.1	No	8.00057	4.66536	6.14768	-0.672093	0.418312	2.62914	8.00527e-06	0.000108689	-0.253781	-1.0904	GC_LAR	Lsmem2	leucine-rich single-pass membrane protein 2	434436
ENSMUSG00000023845	18	18	10	8	0.0842193	13.5762	13.6794	13.5552	13.7086	13063.4	14136.3	No	12156.4	13340.6	12814.3	0.133838	0.102888	1.68591	0.00419428	0.0295645	0.236726	0.0309495	FLT_LAR	Lnpep	leucyl/cystinyl aminopeptidase	240028
ENSMUSG00000062593	18	17	10	7	0.0919244	5.70007	5.92596	6.68521	7.00437	59.125	69.1	No	50.3702	68.0095	60.1698	0.394741	0.310394	1.61733	0.00601985	0.0402328	0.705134	0.0843468	FLT_LAR	Lilrb4a	leukocyte immunoglobulin-like receptor, subfamily B, member 4A	14728
ENSMUSG00000043432	18	18	10	8	0.0887634	10.1391	10.2483	10.1991	10.354	1210.75	1315	No	1120.34	1243.55	1188.79	0.148112	0.116659	1.60688	0.00635343	0.0421303	0.264772	0.0314532	FLT_LAR	Leng9	leukocyte receptor cluster (LRC) member 9	243813
ENSMUSG00000073412	18	18	10	8	0.104004	6.57266	6.35344	7.38524	7.14665	118	85.4	No	105.146	78.5924	90.3941	-0.430648	0.19572	4.90849	2.22045e-16	9.41863e-15	-0.234929	-0.626368	GC_LAR	Lst1	leukocyte specific transcript 1	16988
ENSMUSG00000024696	18	18	10	8	0.14176	7.71582	7.56984	8.16229	7.98529	254.625	199.8	No	226.783	187.327	204.863	-0.284574	0.187952	2.31359	8.52434e-05	0.000928288	-0.096622	-0.472526	GC_LAR	Lpxn	leupaxin	107321
ENSMUSG00000054263	18	18	10	8	0.148084	11.0694	11.3564	11.0377	11.4464	2260.88	3062.2	No	2087.94	3027.9	2610.14	0.53572	0.267141	3.94579	2.06857e-11	5.73853e-10	0.802861	0.268579	FLT_LAR	Lifr	LIF receptor alpha	16880
ENSMUSG00000025019	18	18	10	8	0.0871356	11.4277	11.5164	11.4414	11.5698	2881.62	3108.1	No	2726.42	2983.52	2869.25	0.129645	0.0928602	1.94191	0.000974014	0.00830238	0.222505	0.0367848	FLT_LAR	Lcor	ligand dependent nuclear receptor corepressor	212391
ENSMUSG00000029228	18	18	10	8	0.0813037	10.4895	10.3132	10.6062	10.3552	1556.75	1328.9	No	1490.5	1251.18	1357.55	-0.251674	0.102181	6.09351	2.22045e-16	9.41863e-15	-0.149494	-0.353855	GC_LAR	Lnx1	ligand of numb-protein X 1	16924
ENSMUSG00000016520	18	18	10	8	0.0868695	10.299	10.4095	10.35	10.5058	1354.62	1515.6	No	1245.91	1404.97	1334.28	0.172003	0.133925	1.64298	0.00526643	0.0358442	0.305928	0.0380775	FLT_LAR	Lnx2	ligand of numb-protein X 2	140887
ENSMUSG00000037736	18	18	10	8	0.079837	8.70614	8.83075	8.90086	9.06573	428.375	491.5	No	414.163	466.693	443.346	0.173666	0.123682	1.96127	0.000865934	0.00750353	0.297348	0.0499835	FLT_LAR	Limch1	LIM and calponin homology domains 1	77569
ENSMUSG00000057604	18	18	10	8	0.0891051	6.96637	7.05857	7.55755	7.66581	134.625	149.3	No	122.46	137.553	130.845	0.157846	0.127673	1.56118	0.00801748	0.051654	0.285519	0.0301727	FLT_LAR	Lmcd1	LIM and cysteine-rich domains 1	30937
ENSMUSG00000038366	18	18	10	8	0.0855331	13.5804	13.6826	13.5607	13.7101	13247.4	14711.6	No	12093	13510.1	12880.3	0.159688	0.114808	1.92608	0.00107152	0.00905229	0.274496	0.04488	FLT_LAR	Lasp1	LIM and SH3 protein 1	16796
ENSMUSG00000040699	18	18	10	8	0.121083	9.15408	9.00009	9.36312	9.15672	657.25	530.5	No	603.604	505.07	548.863	-0.259939	0.155776	2.80008	1.98103e-06	2.98392e-05	-0.104162	-0.415715	GC_LAR	Limd2	LIM domain containing 2	67803
ENSMUSG00000032698	18	18	10	8	0.110106	8.31855	8.18126	8.63979	8.46517	363.5	305.9	No	332.094	286.608	306.824	-0.219984	0.127389	3.00494	3.3383e-07	5.6623e-06	-0.0925954	-0.347374	GC_LAR	Lmo2	LIM domain only 2	16909
ENSMUSG00000033060	18	18	10	8	0.0834064	13.5242	13.6679	13.4922	13.704	11987	14131.6	No	11577.5	13538.7	12667.1	0.225828	0.137194	2.69107	4.87186e-06	6.86262e-05	0.363022	0.0886335	FLT_LAR	Lmo7	LIM domain only 7	380928
ENSMUSG00000026934	18	12	7	5	0.172414	0.467364	0.517107	5.37062	5.46435	1	2.1	No	0.828977	1.94624	1.44968	1.08541	0.937669	1.41178	0.0165023	0.0952162	2.02308	0.147743	FLT_LAR	Lhx3	LIM homeobox protein 3	16871
ENSMUSG00000096225	18	7	2	5	0.375	-0.2308	-0.310231	5.44689	5.25804	1.625	0.3	No	2.03116	0.264527	1.0497	-2.52742	1.3726	3.56562	1.40008e-09	3.21017e-08	-1.15481	-3.90002	GC_LAR	Lhx8	LIM homeobox protein 8	16875
ENSMUSG00000061080	18	18	10	8	0.110342	7.78417	7.92661	8.14056	8.31893	236.875	287.2	No	217.081	257.957	239.79	0.246296	0.18895	1.69459	0.00400324	0.0284114	0.435246	0.0573451	FLT_LAR	Lsamp	limbic system-associated membrane protein	268890
ENSMUSG00000050966	18	17	9	8	0.134615	1.58449	1.50316	5.663	5.53017	3.625	2.3	No	4.4069	2.20795	3.18526	-0.809246	0.608268	1.9521	0.000915654	0.00786954	-0.200978	-1.41751	GC_LAR	Lin28a	lin-28 homolog A	83557
ENSMUSG00000063804	18	17	10	7	0.177778	1.49372	1.41956	5.60954	5.54633	2.875	2.2	No	4.98933	2.19303	3.43583	-0.878687	0.736149	1.76708	0.00269081	0.0202419	-0.142539	-1.61484	GC_LAR	Lin28b	lin-28 homolog B	380669
ENSMUSG00000085793	18	18	10	8	0.0908248	9.01959	8.94511	9.22494	9.12471	563.375	520.4	No	530.192	488.428	506.99	-0.116107	0.0869039	1.78958	0.00237183	0.0181275	-0.029203	-0.203011	GC_LAR	Lin52	lin-52 DREAM MuvB core complex component	217708
ENSMUSG00000019906	18	18	10	8	0.088565	7.04227	7.17058	7.60231	7.75047	136.625	158.3	No	128.336	148.249	139.398	0.211132	0.100171	4.43534	4.9738e-14	1.74176e-12	0.311302	0.110961	FLT_LAR	Lin7a	lin-7 homolog A, crumbs cell polarity complex component	108030
ENSMUSG00000053091	18	18	10	8	0.0771303	8.48936	8.58002	8.72503	8.84368	369.875	409.4	No	353.339	392.53	375.112	0.152346	0.103154	2.17361	0.000222994	0.00221721	0.2555	0.0491924	FLT_LAR	Lins1	lines homolog 1	72635
ENSMUSG00000040751	18	18	10	8	0.10376	7.63084	7.39292	8.12329	7.83808	217.5	169.1	No	213.839	165.723	187.108	-0.363209	0.187606	3.76207	1.66879e-10	4.2817e-09	-0.175602	-0.550815	GC_LAR	Lat2	linker for activation of T cells family, member 2	56743
ENSMUSG00000024771	18	18	10	8	0.104777	4.87256	5.15034	6.361	6.63908	28.875	41.8	No	26.3026	40.832	34.3745	0.606311	0.276988	4.74038	8.88178e-16	3.66691e-14	0.883298	0.329323	FLT_LAR	Lipk	lipase, family member K	240633
ENSMUSG00000032207	18	18	10	8	0.106426	4.81825	4.56243	6.51487	6.26345	34.125	22.5	No	33.1109	21.0774	26.4256	-0.633061	0.211594	8.99303	2.22045e-16	9.41863e-15	-0.421468	-0.844655	GC_LAR	Lipc	lipase, hepatic	15450
ENSMUSG00000003123	18	18	10	8	0.101179	9.78373	9.60316	9.9404	9.69151	1033.38	835.7	No	950.471	787.947	860.18	-0.27196	0.217966	1.56595	0.00782716	0.0506387	-0.0539935	-0.489926	GC_LAR	Lipe	lipase, hormone sensitive	16890
ENSMUSG00000024052	18	18	10	8	0.0791934	10.7583	10.8745	10.7871	10.9518	1787.88	2035.9	No	1702.4	1938.57	1833.6	0.187867	0.119725	2.44849	3.20683e-05	0.000385449	0.307592	0.0681426	FLT_LAR	Lpin2	lipin 2	64898
ENSMUSG00000026822	18	18	10	8	0.093161	6.38582	6.67228	7.13123	7.45198	89.125	114.4	No	79.4202	111.049	96.9918	0.455458	0.20845	4.74641	6.66134e-16	2.77194e-14	0.663909	0.247008	FLT_LAR	Lcn2	lipocalin 2	16819
ENSMUSG00000015568	18	18	10	8	0.196161	10.9875	10.2194	11.214	10.1189	3003.75	1321.5	No	2600.77	1279.26	1866.6	-1.02403	0.391552	6.87779	2.22045e-16	9.41863e-15	-0.632477	-1.41558	GC_LAR	Lpl	lipoprotein lipase	16956
ENSMUSG00000107252	18	7	5	2	0.357143	-0.52658	-0.486085	5.25958	5.37401	0.25	1.2	No	0.211962	1.10957	0.71063	1.84717	1.4231	1.96255	0.000859218	0.00745024	3.27027	0.424068	FLT_LAR	Litafd	LITAF domain containing	436336
ENSMUSG00000021069	18	18	10	8	0.103231	9.39216	9.24606	9.57368	9.376	799.75	660.2	No	706.644	606.085	650.778	-0.225144	0.166511	1.84111	0.0017675	0.0139758	-0.0586331	-0.391654	GC_LAR	Pygl	liver glycogen phosphorylase	110095
ENSMUSG00000098318	18	18	10	8	0.0945008	6.77817	6.44519	7.55636	7.18707	121.25	90.3	No	135.591	86.8857	108.532	-0.624299	0.328578	3.61947	7.89985e-10	1.86665e-08	-0.295721	-0.952877	GC_LAR	Lockd	lncRNA downstream of Cdkn1b	381822
ENSMUSG00000016239	18	18	10	8	0.0861342	8.38619	8.82488	8.54628	9.1231	340.75	509.9	No	315.929	493.258	414.445	0.636658	0.180023	12.2521	2.22045e-16	9.41863e-15	0.816681	0.456634	FLT_LAR	Lonrf3	LON peptidase N-terminal domain and ring finger 3	74365
ENSMUSG00000043165	18	18	10	8	0.169811	2.85709	2.94655	5.78812	5.87351	7	10.3	No	6.30421	9.01216	7.80863	0.520622	0.437723	1.43709	0.0146626	0.0860355	0.958345	0.0828992	FLT_LAR	Lor	loricrin	16939
ENSMUSG00000040249	18	18	10	8	0.0961643	13.8328	14.0746	13.7642	14.1281	15624.1	19403.4	No	14996.2	18123.1	16733.4	0.273212	0.214178	1.61358	0.00613788	0.0408969	0.48739	0.0590347	FLT_LAR	Lrp1	low density lipoprotein receptor-related protein 1	16971
ENSMUSG00000030201	18	18	10	8	0.0843863	13.4523	13.5497	13.4339	13.5783	11930.4	12900.1	No	11144.6	12188.5	11724.6	0.128908	0.0988733	1.69384	0.00401929	0.0285145	0.227781	0.0300345	FLT_LAR	Lrp6	low density lipoprotein receptor-related protein 6	16974
ENSMUSG00000022175	18	18	10	8	0.0933522	12.8568	12.9714	12.8399	13.0035	8022	9237.1	No	7306.88	8412.23	7920.96	0.203119	0.155717	1.69155	0.00406919	0.0288374	0.358836	0.0474025	FLT_LAR	Lrp10	low-density lipoprotein receptor-related protein 10	65107
ENSMUSG00000028080	18	18	10	8	0.0844605	13.5879	13.7694	13.5458	13.814	13094.4	15260.8	No	12072.8	14367.4	13347.6	0.250682	0.104039	5.76252	2.22045e-16	9.41863e-15	0.354721	0.146643	FLT_LAR	Lrba	LPS-responsive beige-like anchor	80877
ENSMUSG00000020607	18	18	10	8	0.10128	7.68798	7.81716	8.0691	8.22972	229.25	261.9	No	203.58	235.191	221.141	0.200842	0.163019	1.52778	0.00946961	0.0595223	0.363861	0.0378232	FLT_LAR	Lratd1	LRAT domain containing 1	105005
ENSMUSG00000021953	18	7	2	5	0.585366	0.954908	0.967898	5.43761	5.34845	2	2.5	No	1.6119	2.93339	0.755307	-2.96357	1.35109	5.88001	2.22045e-16	9.41863e-15	-1.61248	-4.31466	GC_LAR	Tdh	L-threonine dehydrogenase	58865
ENSMUSG00000050447	18	18	10	8	0.0969945	5.10482	5.31832	6.48553	6.69706	34	46	No	31.6546	43.8649	38.4381	0.465978	0.207366	5.02078	2.22045e-16	9.41863e-15	0.673344	0.258611	FLT_LAR	Lypd6	LY6/PLAUR domain containing 6	320343
ENSMUSG00000037145	18	18	10	8	0.176946	7.37865	7.13544	7.94882	7.6517	235.625	145.5	No	207.904	136.313	168.132	-0.610893	0.329567	3.46639	3.934e-09	8.53633e-08	-0.281326	-0.94046	GC_LAR	Lypd8l	LY6/PLAUR domain containing 8 like	78354
ENSMUSG00000034041	18	18	10	8	0.0784996	7.16032	7.02548	7.75302	7.59733	154.375	135.1	No	149.275	128.607	137.793	-0.211442	0.139832	2.29542	9.68704e-05	0.00104111	-0.0716099	-0.351273	GC_LAR	Lyl1	lymphoblastomic leukemia 1	17095
ENSMUSG00000053168	18	18	10	8	0.110003	9.71123	9.39456	9.89418	9.47499	1118.88	679.4	No	1057.87	646.825	829.509	-0.709685	0.319533	4.97268	2.22045e-16	9.41863e-15	-0.390152	-1.02922	GC_LAR	9030619P08Rik	lymphocyte antigen 6 complex pseudogene	105892
ENSMUSG00000102051	18	16	8	8	0.243902	1.10479	1.03038	5.60418	5.45067	3.25	1.5	No	3.16332	1.46781	2.22137	-1.07688	0.66334	2.69691	4.64641e-06	6.56261e-05	-0.413544	-1.74022	GC_LAR	Ly6a2	lymphocyte antigen 6 complex, locus A2	546643
ENSMUSG00000022584	18	18	10	8	0.197999	10.1505	9.59603	10.3664	9.59573	1748.62	889.5	No	1431.89	825.345	1094.92	-0.795489	0.378506	4.45311	3.95239e-14	1.40275e-12	-0.416983	-1.174	GC_LAR	Ly6c2	lymphocyte antigen 6 complex, locus C2	100041546
ENSMUSG00000034634	18	18	10	8	0.16295	8.77002	8.48478	9.05943	8.68633	543	368.3	No	490.366	350.918	412.895	-0.484417	0.223319	4.74278	8.88178e-16	3.66691e-14	-0.261097	-0.707736	GC_LAR	Ly6d	lymphocyte antigen 6 complex, locus D	17068
ENSMUSG00000022583	18	12	5	7	0.184615	1.83944	1.58676	5.75434	5.38466	6.25	1.5	No	7.45652	1.27359	4.02156	-2.40448	0.870339	7.64031	2.22045e-16	9.41863e-15	-1.53414	-3.27482	GC_LAR	Ly6f	lymphocyte antigen 6 complex, locus F	17071
ENSMUSG00000034923	18	18	10	8	0.099723	5.31498	5.18113	6.68754	6.55302	44.5	36.6	No	43.2957	35.136	38.7626	-0.281948	0.191138	2.22629	0.00015627	0.00161041	-0.0908098	-0.473085	GC_LAR	Ly6g6f	lymphocyte antigen 6 complex, locus G6F	433099
ENSMUSG00000063522	18	18	10	8	0.135988	10.4618	10.2003	10.5694	10.2196	1923.5	1376.9	No	1924.27	1285.54	1569.42	-0.581572	0.428298	1.85878	0.00159538	0.012784	-0.153274	-1.00987	GC_LAR	Ly6m	lymphocyte antigen 6 complex, locus M	67038
ENSMUSG00000026980	18	18	10	8	0.102771	11.3034	11.4968	11.2879	11.5712	2829.12	3211	No	2536.91	3007.13	2798.14	0.24427	0.172591	1.98932	0.000728951	0.0064396	0.416862	0.0716791	FLT_LAR	Ly75	lymphocyte antigen 75	17076
ENSMUSG00000021423	18	18	10	8	0.12855	8.60753	8.43774	8.8908	8.67064	454.125	358.6	No	413.193	342.872	374.126	-0.274316	0.16294	2.85192	1.27641e-06	1.97577e-05	-0.111376	-0.437256	GC_LAR	Ly86	lymphocyte antigen 86	17084
ENSMUSG00000004707	18	18	10	8	0.10293	7.72993	7.5626	8.17851	7.97491	257.875	199.8	No	230.881	184.912	205.343	-0.328041	0.185876	3.14649	9.10888e-08	1.67755e-06	-0.142166	-0.513917	GC_LAR	Ly9	lymphocyte antigen 9	17085
ENSMUSG00000002699	18	18	10	8	0.0946217	8.20661	8.09321	8.54261	8.39913	333.125	282	No	311.526	269.538	288.199	-0.214582	0.15157	2.01385	0.000625963	0.00560613	-0.0630116	-0.366152	GC_LAR	Lcp2	lymphocyte cytosolic protein 2	16822
ENSMUSG00000000409	18	18	10	8	0.118313	7.59201	7.38681	8.0871	7.83817	224.125	174	No	213.461	163.228	185.554	-0.383905	0.203389	3.58243	1.17213e-09	2.71594e-08	-0.180516	-0.587294	GC_LAR	Lck	lymphocyte protein tyrosine kinase	16818
ENSMUSG00000018819	18	18	10	8	0.102598	11.4291	11.2874	11.5029	11.2982	3096.62	2634.9	No	2853.3	2458.43	2633.93	-0.216194	0.0962037	5.07594	2.22045e-16	9.41863e-15	-0.11999	-0.312398	GC_LAR	Lsp1	lymphocyte specific 1	16985
ENSMUSG00000051998	18	18	10	8	0.0965876	8.92527	8.70814	9.17772	8.88999	547.875	426.2	No	521.408	413.126	461.251	-0.335854	0.178498	3.55898	1.50164e-09	3.42512e-08	-0.157355	-0.514352	GC_LAR	Lax1	lymphocyte transmembrane adaptor 1	240754
ENSMUSG00000030124	18	18	10	8	0.137163	5.50205	5.29902	6.7914	6.59133	57.75	39.1	No	52.5728	37.3133	44.0953	-0.516532	0.254678	4.15544	1.69931e-12	5.20257e-11	-0.261855	-0.77121	GC_LAR	Lag3	lymphocyte-activation gene 3	16768
ENSMUSG00000027985	18	18	10	8	0.0817271	6.2033	6.00548	7.16143	6.95261	81.5	64.5	No	80.1157	62.2805	70.2072	-0.357594	0.180688	3.93672	2.29812e-11	6.34189e-10	-0.176906	-0.538282	GC_LAR	Lef1	lymphoid enhancer binding factor 1	16842
ENSMUSG00000024399	18	18	10	8	0.165187	7.78168	7.61384	8.22088	8.01499	274.375	208.5	No	247.795	194.831	218.37	-0.350584	0.246314	2.04197	0.000524614	0.00480217	-0.104269	-0.596898	GC_LAR	Ltb	lymphotoxin B	16994
ENSMUSG00000042228	18	18	10	8	0.0899309	11.1268	11.0279	11.1986	11.0565	2449.38	2194.8	No	2283.05	2061.68	2160.07	-0.147956	0.0647193	5.24366	2.22045e-16	9.41863e-15	-0.0832368	-0.212675	GC_LAR	Lyn	LYN proto-oncogene, Src family tyrosine kinase	17096
ENSMUSG00000098832	18	8	2	6	0.263158	0.353793	0.229133	5.53343	5.25694	2	0.3	No	3.32435	0.23891	1.61022	-3.16488	1.23858	6.82568	2.22045e-16	9.41863e-15	-1.9263	-4.40346	GC_LAR	Kdm4dl	lysine (K)-specific demethylase 4D-like	547035
ENSMUSG00000042599	18	18	10	8	0.075723	12.3256	12.4488	12.3126	12.4918	5318	5949.9	No	5050.8	5741.07	5434.28	0.18451	0.105655	3.03337	2.58349e-07	4.45238e-06	0.290165	0.0788547	FLT_LAR	Kdm7a	lysine (K)-specific demethylase 7A	338523
ENSMUSG00000053769	18	18	10	8	0.0913357	8.88467	8.74178	9.12342	8.9338	525.875	453	No	487.439	419.776	449.848	-0.217739	0.0772507	7.99482	2.22045e-16	9.41863e-15	-0.140489	-0.29499	GC_LAR	Lysmd1	LysM, putative peptidoglycan-binding, domain containing 1	217779
ENSMUSG00000021608	18	18	10	8	0.0888417	10.1736	10.0846	10.2842	10.1592	1269	1152.7	No	1179.24	1073.45	1120.47	-0.136838	0.0726419	3.56194	1.45559e-09	3.33455e-08	-0.0641959	-0.20948	GC_LAR	Lpcat1	lysophosphatidylcholine acyltransferase 1	210992
ENSMUSG00000041247	18	17	9	8	0.145833	2.36388	2.25344	5.79831	5.63406	6.375	4.5	No	6.99405	3.95596	5.30622	-0.677252	0.512621	1.79647	0.00228129	0.0175529	-0.164631	-1.18987	GC_LAR	Lamp3	lysosomal-associated membrane protein 3	239739
ENSMUSG00000028581	18	18	10	8	0.0945973	10.8184	10.6867	10.906	10.7179	2157.5	1774.1	No	1933.01	1640.49	1770.5	-0.237783	0.184056	1.67822	0.00437031	0.0305841	-0.0537275	-0.421839	GC_LAR	Laptm5	lysosomal-associated protein transmembrane 5	16792
ENSMUSG00000069516	18	18	10	8	0.150509	13.5965	13.3814	13.6556	13.3437	14712.2	11026.9	No	13349.1	10472.1	11750.8	-0.350276	0.16819	4.36591	1.21902e-13	4.08918e-12	-0.182087	-0.518466	GC_LAR	Lyz2	lysozyme 2	17105
ENSMUSG00000032530	18	18	10	8	0.140426	3.68826	3.53929	6.10421	5.95429	16.125	10.6	No	15.5261	10.6	12.7894	-0.572393	0.339305	2.85376	1.25641e-06	1.9471e-05	-0.233088	-0.911698	GC_LAR	Lyzl4	lysozyme-like 4	69032
ENSMUSG00000034205	18	18	10	8	0.0867761	10.5872	10.4276	10.6933	10.4662	1717.25	1494.5	No	1607.16	1374.43	1477.86	-0.225433	0.154869	2.12926	0.000299061	0.0028873	-0.0705631	-0.380302	GC_LAR	Loxl2	lysyl oxidase-like 2	94352
ENSMUSG00000051065	18	18	10	8	0.0891469	8.9625	9.07411	9.12504	9.27615	544.625	606.4	No	492.45	554.269	526.793	0.164549	0.120573	1.86779	0.00151362	0.012252	0.285121	0.043976	FLT_LAR	Mb21d2	Mab-21 domain containing 2	239796
ENSMUSG00000057777	18	18	10	8	0.104831	9.98207	10.0922	10.0522	10.2059	1074.5	1249.5	No	1002.8	1131.19	1074.13	0.173893	0.14632	1.40678	0.0168886	0.0970824	0.320213	0.0275728	FLT_LAR	Mab21l2	mab-21-like 2	23937
ENSMUSG00000034159	18	18	10	8	0.107471	8.5478	8.67861	8.76217	8.93536	401.75	472.3	No	369.212	430.189	403.089	0.216216	0.168101	1.64987	0.0050792	0.0347136	0.384317	0.0481143	FLT_LAR	Mab21l4	mab-21-like 4	71874
ENSMUSG00000046805	18	18	10	8	0.100043	11.0937	10.9504	11.1722	10.9712	2616.62	2100.9	No	2360.86	1962.16	2139.36	-0.267688	0.18843	2.02987	0.000566203	0.00513854	-0.0792586	-0.456118	GC_LAR	Mpeg1	macrophage expressed gene 1	17476
ENSMUSG00000086712	18	18	10	8	0.122646	6.76257	6.61219	7.48674	7.3213	136.5	108.5	No	118.852	97.3236	106.892	-0.297734	0.233635	1.65037	0.00506585	0.0346404	-0.0640986	-0.531369	GC_LAR	Mexis	macrophage expressed LXRa(NR1H3)-dependent amplifier of Abca1 transcription lncRNA	381524
ENSMUSG00000040950	18	18	10	8	0.108151	7.38326	7.13714	7.93793	7.65153	204.75	147.8	No	180.739	136.806	156.332	-0.413868	0.174424	5.70126	2.22045e-16	9.41863e-15	-0.239444	-0.588291	GC_LAR	Mgl2	macrophage galactose N-acetyl-galactosamine specific lectin 2	216864
ENSMUSG00000032591	18	18	10	8	0.170103	3.37652	3.21191	6.02593	5.85561	13.625	8.5	No	13.6715	8.06492	10.5567	-0.752682	0.426309	3.12852	1.07746e-07	1.96643e-06	-0.326372	-1.17899	GC_LAR	Mst1	macrophage stimulating 1 (hepatocyte growth factor-like)	15235
ENSMUSG00000029910	18	18	10	8	0.11692	9.30351	9.07941	9.51365	9.21071	749.625	605.4	No	702.814	539.601	612.14	-0.378439	0.232597	2.66435	6.04402e-06	8.35268e-05	-0.145842	-0.611036	GC_LAR	Mad2l1	MAD2 mitotic arrest deficient-like 1	56150
[truncated: 2,934 more rows]

## Sheet: Col ISS <0.1 fdr
Gene model	total_samples	occurrence_total	occurrence_FLT_ISS	occurrence_GC_ISS	sparsity	rlog_av_GC_ISS	rlog_av_FLT_ISS	vst_av_GC_ISS	vst_av_FLT_ISS	raw_av_GC_ISS	raw_av_FLT_ISS	structural_zero	DESeq2Norm_av_GC_ISS	DESeq2Norm_av_FLT_ISS	baseMean	log2FoldChange	lfcSE	stat	pvalue	padj	errorBarUp	errorBarLow	Final_Regulation	SYMBOL	GENENAME	ENTREZID
[truncated: 4,476 more rows]

[truncated: 2 more sheets: Liv LAR <0.1 fdr, Liv ISS <0.1 fdr]
