# Supplementary material for: Spaceflight alters host-gut microbiota interactions
Source: Research Square preprint supplement (doi:10.21203/rs.3.rs-3879489/v1), 2024-06-11
Supplement: Supplementary file 5 [file e0317e15c86b06c553753787.xlsx]

## Sheet: KEGG_annotation_summary
Total Contigs ISS	23518
Total ORFs ISS	218157
ISS Contigs With No ORF	711
ISS ORFs with KO annotation	92964
ISS ORFs With No KO	125904
ISS Unique KO Ids	5546
Total Contigs LAR	33428
Total ORFs LAR	245992
LAR Contigs With No ORF	352
LAR ORFs with KO annotation	105906
LAR ORFs With No KO	140438
LAR Unique KO Ids	5803

## Sheet: ORF_annotation
Contig	ORF	KEGG annotation
k127_1000081	k127_1000081_1	NA
k127_1000081	k127_1000081_2	K06168
k127_100056	k127_100056_1	NA
k127_100056	k127_100056_2	NA
k127_1001006	k127_1001006_1	NA
k127_1001163	k127_1001163_1	NA
k127_1001163	k127_1001163_10	NA
k127_1001163	k127_1001163_11	NA
k127_1001163	k127_1001163_12	NA
k127_1001163	k127_1001163_13	NA
k127_1001163	k127_1001163_14	NA
k127_1001163	k127_1001163_15	NA
k127_1001163	k127_1001163_16	NA
k127_1001163	k127_1001163_17	NA
k127_1001163	k127_1001163_18	NA
k127_1001163	k127_1001163_19	K03205
k127_1001163	k127_1001163_2	NA
k127_1001163	k127_1001163_20	NA
k127_1001163	k127_1001163_21	NA
k127_1001163	k127_1001163_22	NA
k127_1001163	k127_1001163_23	NA
k127_1001163	k127_1001163_24	K02283
k127_1001163	k127_1001163_25	NA
k127_1001163	k127_1001163_26	NA
k127_1001163	k127_1001163_27	NA
k127_1001163	k127_1001163_28	K02654
k127_1001163	k127_1001163_29	NA
k127_1001163	k127_1001163_3	NA
k127_1001163	k127_1001163_30	NA
k127_1001163	k127_1001163_31	NA
k127_1001163	k127_1001163_32	NA
k127_1001163	k127_1001163_33	NA
k127_1001163	k127_1001163_34	NA
k127_1001163	k127_1001163_35	K20074
k127_1001163	k127_1001163_36	NA
k127_1001163	k127_1001163_37	NA
k127_1001163	k127_1001163_38	NA
k127_1001163	k127_1001163_39	NA
k127_1001163	k127_1001163_4	NA
k127_1001163	k127_1001163_40	NA
k127_1001163	k127_1001163_41	NA
k127_1001163	k127_1001163_42	NA
k127_1001163	k127_1001163_43	NA
k127_1001163	k127_1001163_44	K06400
k127_1001163	k127_1001163_45	NA
k127_1001163	k127_1001163_46	NA
k127_1001163	k127_1001163_47	NA
k127_1001163	k127_1001163_48	NA
k127_1001163	k127_1001163_49	NA
k127_1001163	k127_1001163_5	NA
k127_1001163	k127_1001163_50	NA
k127_1001163	k127_1001163_51	NA
k127_1001163	k127_1001163_52	NA
k127_1001163	k127_1001163_53	NA
k127_1001163	k127_1001163_54	K07481
k127_1001163	k127_1001163_55	K07481
k127_1001163	k127_1001163_56	NA
k127_1001163	k127_1001163_57	NA
k127_1001163	k127_1001163_58	NA
k127_1001163	k127_1001163_59	K07335
k127_1001163	k127_1001163_6	NA
k127_1001163	k127_1001163_60	K23537
k127_1001163	k127_1001163_61	K23535
k127_1001163	k127_1001163_62	K23536
k127_1001163	k127_1001163_63	K04477
k127_1001163	k127_1001163_64	K03651
k127_1001163	k127_1001163_65	K12960
k127_1001163	k127_1001163_66	NA
k127_1001163	k127_1001163_67	K07486
k127_1001163	k127_1001163_68	K01839
k127_1001163	k127_1001163_69	K07141
k127_1001163	k127_1001163_7	NA
k127_1001163	k127_1001163_70	NA
k127_1001163	k127_1001163_71	K03518
k127_1001163	k127_1001163_72	NA
k127_1001163	k127_1001163_8	K00571
k127_1001163	k127_1001163_9	NA
k127_1001285	k127_1001285_1	NA
k127_1001285	k127_1001285_2	NA
k127_100149	k127_100149_1	NA
k127_100149	k127_100149_10	K02372
k127_100149	k127_100149_11	K04104
k127_100149	k127_100149_12	K00459
k127_100149	k127_100149_13	K00648
k127_100149	k127_100149_14	NA
k127_100149	k127_100149_15	NA
k127_100149	k127_100149_16	K03411
k127_100149	k127_100149_17	NA
k127_100149	k127_100149_18	NA
k127_100149	k127_100149_19	NA
k127_100149	k127_100149_2	NA
k127_100149	k127_100149_20	NA
k127_100149	k127_100149_21	NA
k127_100149	k127_100149_22	NA
k127_100149	k127_100149_23	NA
k127_100149	k127_100149_24	NA
k127_100149	k127_100149_3	NA
k127_100149	k127_100149_4	K01218
k127_100149	k127_100149_5	K02078
k127_100149	k127_100149_6	K02371
k127_100149	k127_100149_7	K00645
k127_100149	k127_100149_8	K00059
k127_100149	k127_100149_9	K09458
k127_1001688	k127_1001688_1	NA
k127_1001688	k127_1001688_2	NA
k127_1001844	k127_1001844_1	NA
k127_1001844	k127_1001844_10	K19350
k127_1001844	k127_1001844_11	K05601
k127_1001844	k127_1001844_2	K03929
k127_1001844	k127_1001844_3	K00625
k127_1001844	k127_1001844_4	K02078
k127_1001844	k127_1001844_5	NA
k127_1001844	k127_1001844_6	K00626
k127_1001844	k127_1001844_7	NA
k127_1001844	k127_1001844_8	K00929
k127_1001844	k127_1001844_9	NA
k127_1002039	k127_1002039_1	NA
k127_1002289	k127_1002289_1	NA
k127_1002374	k127_1002374_1	NA
k127_1002576	k127_1002576_1	K08798
k127_1002576	k127_1002576_2	NA
k127_1002576	k127_1002576_3	K03544
k127_1002716	NA	NA
k127_1002758	k127_1002758_1	NA
k127_1002758	k127_1002758_2	NA
k127_1003012	k127_1003012_1	NA
k127_1003012	k127_1003012_2	K17319
k127_1003012	k127_1003012_3	K17320
k127_1003012	k127_1003012_4	K17318
k127_1003012	k127_1003012_5	K12308
k127_1003012	k127_1003012_6	K07718
k127_1003012	k127_1003012_7	K07720
k127_100305	k127_100305_1	NA
k127_100305	k127_100305_2	NA
k127_100305	k127_100305_3	NA
k127_1003090	k127_1003090_1	NA
k127_1003090	k127_1003090_2	NA
k127_1003756	k127_1003756_1	K02003
k127_1003756	k127_1003756_2	K02004
k127_1003792	k127_1003792_1	NA
k127_1004098	k127_1004098_1	K01066
k127_1004098	k127_1004098_2	NA
k127_1004098	k127_1004098_3	NA
k127_1004183	k127_1004183_1	K03205
k127_1004601	k127_1004601_1	NA
k127_1004601	k127_1004601_2	NA
k127_1004747	k127_1004747_1	K03553
k127_1004747	k127_1004747_2	K03553
k127_1004747	k127_1004747_3	K00995
k127_1004747	k127_1004747_4	K14441
k127_1004883	k127_1004883_1	NA
k127_1004883	k127_1004883_2	K11527
k127_1005618	k127_1005618_1	NA
k127_1005618	k127_1005618_2	NA
k127_1005626	k127_1005626_1	K01470
k127_1005626	k127_1005626_2	K03704
k127_1005626	k127_1005626_3	NA
k127_1005749	k127_1005749_1	NA
k127_1005749	k127_1005749_2	NA
k127_1005749	k127_1005749_3	NA
k127_1005749	k127_1005749_4	NA
k127_100580	k127_100580_1	NA
k127_100580	k127_100580_10	NA
k127_100580	k127_100580_11	K07699
k127_100580	k127_100580_12	K18349
k127_100580	k127_100580_13	K18350
k127_100580	k127_100580_14	K07258
k127_100580	k127_100580_15	K19350
k127_100580	k127_100580_2	NA
k127_100580	k127_100580_3	K00096
k127_100580	k127_100580_4	NA
k127_100580	k127_100580_5	K20488
k127_100580	k127_100580_6	K20487
k127_100580	k127_100580_7	K01990
k127_100580	k127_100580_8	NA
k127_100580	k127_100580_9	NA
k127_1006030	k127_1006030_1	K13653
k127_1006030	k127_1006030_2	K07727
k127_1006030	k127_1006030_3	K07318
k127_1006030	k127_1006030_4	NA
k127_1006398	k127_1006398_1	NA
k127_1006398	k127_1006398_10	K02003
k127_1006398	k127_1006398_11	NA
k127_1006398	k127_1006398_12	NA
k127_1006398	k127_1006398_13	NA
k127_1006398	k127_1006398_14	NA
k127_1006398	k127_1006398_15	NA
k127_1006398	k127_1006398_2	K11632
k127_1006398	k127_1006398_3	K14988
k127_1006398	k127_1006398_4	K14989
k127_1006398	k127_1006398_5	NA
k127_1006398	k127_1006398_6	NA
k127_1006398	k127_1006398_7	NA
k127_1006398	k127_1006398_8	NA
k127_1006398	k127_1006398_9	NA
k127_100646	k127_100646_1	NA
k127_1006778	k127_1006778_1	K03595
k127_1006778	k127_1006778_10	K02824
k127_1006778	k127_1006778_11	NA
k127_1006778	k127_1006778_12	NA
k127_1006778	k127_1006778_13	NA
k127_1006778	k127_1006778_14	NA
k127_1006778	k127_1006778_2	K01489
k127_1006778	k127_1006778_3	K07042
k127_1006778	k127_1006778_4	K06217
k127_1006778	k127_1006778_5	K06438
k127_1006778	k127_1006778_6	NA
k127_1006778	k127_1006778_7	K09117
k127_1006778	k127_1006778_8	K02970
k127_1006778	k127_1006778_9	NA
k127_1006810	k127_1006810_1	NA
k127_1006810	k127_1006810_10	NA
k127_1006810	k127_1006810_100	NA
k127_1006810	k127_1006810_101	NA
k127_1006810	k127_1006810_102	NA
k127_1006810	k127_1006810_11	NA
k127_1006810	k127_1006810_12	K03442
k127_1006810	k127_1006810_13	K07448
k127_1006810	k127_1006810_14	K00783
k127_1006810	k127_1006810_15	NA
k127_1006810	k127_1006810_16	K07171
k127_1006810	k127_1006810_17	K01775
k127_1006810	k127_1006810_18	K23997
k127_1006810	k127_1006810_19	K00997
k127_1006810	k127_1006810_2	NA
k127_1006810	k127_1006810_20	NA
k127_1006810	k127_1006810_21	K01926
k127_1006810	k127_1006810_22	K06158
k127_1006810	k127_1006810_23	NA
k127_1006810	k127_1006810_24	NA
k127_1006810	k127_1006810_25	NA
k127_1006810	k127_1006810_26	K02171
k127_1006810	k127_1006810_27	K12960
k127_1006810	k127_1006810_28	K03783
k127_1006810	k127_1006810_29	NA
k127_1006810	k127_1006810_3	K00170
k127_1006810	k127_1006810_30	K03596
k127_1006810	k127_1006810_31	NA
k127_1006810	k127_1006810_32	NA
k127_1006810	k127_1006810_33	NA
k127_1006810	k127_1006810_34	NA
k127_1006810	k127_1006810_35	K03091
k127_1006810	k127_1006810_36	NA
k127_1006810	k127_1006810_37	K01297
k127_1006810	k127_1006810_38	K03768
k127_1006810	k127_1006810_39	K06168
k127_1006810	k127_1006810_4	K00169
k127_1006810	k127_1006810_40	K04771
k127_1006810	k127_1006810_41	K14170
k127_1006810	k127_1006810_42	K13940
k127_1006810	k127_1006810_43	K00796
k127_1006810	k127_1006810_44	K01495
k127_1006810	k127_1006810_45	NA
k127_1006810	k127_1006810_46	NA
k127_1006810	k127_1006810_47	NA
k127_1006810	k127_1006810_48	K01990
k127_1006810	k127_1006810_49	NA
k127_1006810	k127_1006810_5	K00171
k127_1006810	k127_1006810_50	K00600
k127_1006810	k127_1006810_51	K01945
k127_1006810	k127_1006810_52	K11175
k127_1006810	k127_1006810_53	K01933
k127_1006810	k127_1006810_54	K01666
k127_1006810	k127_1006810_55	K06024
k127_1006810	k127_1006810_56	K05896
k127_1006810	k127_1006810_57	K07098
k127_1006810	k127_1006810_58	K03324
k127_1006810	k127_1006810_59	K00375
k127_1006810	k127_1006810_6	K00172
k127_1006810	k127_1006810_60	K11753
k127_1006810	k127_1006810_61	K03177
k127_1006810	k127_1006810_62	K06881
k127_1006810	k127_1006810_63	K02834
k127_1006810	k127_1006810_64	K02519
k127_1006810	k127_1006810_65	NA
k127_1006810	k127_1006810_66	K07742
k127_1006810	k127_1006810_67	K02600
k127_1006810	k127_1006810_68	K09748
k127_1006810	k127_1006810_69	K06147
k127_1006810	k127_1006810_7	K07636
k127_1006810	k127_1006810_70	NA
k127_1006810	k127_1006810_71	NA
k127_1006810	k127_1006810_72	NA
k127_1006810	k127_1006810_73	K03763
k127_1006810	k127_1006810_74	K03526
k127_1006810	k127_1006810_75	K11749
k127_1006810	k127_1006810_76	K00099
k127_1006810	k127_1006810_77	K00981
k127_1006810	k127_1006810_78	K00806
k127_1006810	k127_1006810_79	K02838
k127_1006810	k127_1006810_8	K07658
k127_1006810	k127_1006810_80	K09903
k127_1006810	k127_1006810_81	NA
k127_1006810	k127_1006810_82	NA
k127_1006810	k127_1006810_83	NA
k127_1006810	k127_1006810_84	K00763
k127_1006810	k127_1006810_85	NA
k127_1006810	k127_1006810_86	NA
k127_1006810	k127_1006810_87	NA
k127_1006810	k127_1006810_88	NA
k127_1006810	k127_1006810_89	NA
k127_1006810	k127_1006810_9	NA
k127_1006810	k127_1006810_90	NA
k127_1006810	k127_1006810_91	NA
k127_1006810	k127_1006810_92	NA
k127_1006810	k127_1006810_93	NA
k127_1006810	k127_1006810_94	NA
k127_1006810	k127_1006810_95	NA
k127_1006810	k127_1006810_96	NA
k127_1006810	k127_1006810_97	NA
k127_1006810	k127_1006810_98	NA
k127_1006810	k127_1006810_99	NA
k127_1006922	k127_1006922_1	K01687
k127_1007008	k127_1007008_1	NA
k127_1007307	k127_1007307_1	K03310
k127_1007307	k127_1007307_2	NA
k127_1007307	k127_1007307_3	K00773
k127_100734	k127_100734_1	NA
k127_100734	k127_100734_10	K03630
k127_100734	k127_100734_11	NA
k127_100734	k127_100734_12	K01972
k127_100734	k127_100734_13	NA
k127_100734	k127_100734_14	NA
k127_100734	k127_100734_15	NA
k127_100734	k127_100734_16	NA
k127_100734	k127_100734_17	NA
k127_100734	k127_100734_18	K00925
k127_100734	k127_100734_19	NA
k127_100734	k127_100734_2	NA
k127_100734	k127_100734_20	K01925
k127_100734	k127_100734_21	NA
k127_100734	k127_100734_22	NA
k127_100734	k127_100734_23	NA
k127_100734	k127_100734_24	NA
k127_100734	k127_100734_3	NA
k127_100734	k127_100734_4	NA
k127_100734	k127_100734_5	NA
k127_100734	k127_100734_6	NA
k127_100734	k127_100734_7	NA
k127_100734	k127_100734_8	NA
k127_100734	k127_100734_9	K06179
k127_1007505	k127_1007505_1	K10844
k127_1007505	k127_1007505_10	K03783
k127_1007505	k127_1007505_11	K03310
k127_1007505	k127_1007505_12	K03322
k127_1007505	k127_1007505_13	K01714
k127_1007505	k127_1007505_14	NA
k127_1007505	k127_1007505_15	K02529
k127_1007505	k127_1007505_16	K08483
k127_1007505	k127_1007505_17	K02784
k127_1007505	k127_1007505_18	K19956
k127_1007505	k127_1007505_19	K00882
k127_1007505	k127_1007505_2	K02784
k127_1007505	k127_1007505_20	K02798
k127_1007505	k127_1007505_21	K03483
k127_1007505	k127_1007505_22	K02800
k127_1007505	k127_1007505_23	K02800
k127_1007505	k127_1007505_3	NA
k127_1007505	k127_1007505_4	NA
k127_1007505	k127_1007505_5	NA
k127_1007505	k127_1007505_6	NA
k127_1007505	k127_1007505_7	K00928
k127_1007505	k127_1007505_8	NA
k127_1007505	k127_1007505_9	K22900
k127_1007917	k127_1007917_1	NA
k127_1007917	k127_1007917_10	NA
k127_1007917	k127_1007917_11	NA
k127_1007917	k127_1007917_12	NA
k127_1007917	k127_1007917_13	NA
k127_1007917	k127_1007917_14	NA
k127_1007917	k127_1007917_15	NA
k127_1007917	k127_1007917_16	NA
k127_1007917	k127_1007917_17	NA
k127_1007917	k127_1007917_18	NA
k127_1007917	k127_1007917_19	K00986
k127_1007917	k127_1007917_2	NA
k127_1007917	k127_1007917_20	NA
k127_1007917	k127_1007917_21	NA
k127_1007917	k127_1007917_22	NA
k127_1007917	k127_1007917_23	NA
k127_1007917	k127_1007917_24	NA
k127_1007917	k127_1007917_25	K06903
k127_1007917	k127_1007917_26	NA
k127_1007917	k127_1007917_27	NA
k127_1007917	k127_1007917_28	K06905
k127_1007917	k127_1007917_29	NA
k127_1007917	k127_1007917_3	NA
k127_1007917	k127_1007917_30	NA
k127_1007917	k127_1007917_31	NA
k127_1007917	k127_1007917_32	K06908
k127_1007917	k127_1007917_33	K06907
k127_1007917	k127_1007917_34	NA
k127_1007917	k127_1007917_35	NA
k127_1007917	k127_1007917_36	NA
k127_1007917	k127_1007917_37	NA
k127_1007917	k127_1007917_38	NA
k127_1007917	k127_1007917_39	NA
k127_1007917	k127_1007917_4	NA
k127_1007917	k127_1007917_40	NA
k127_1007917	k127_1007917_41	NA
k127_1007917	k127_1007917_42	NA
k127_1007917	k127_1007917_43	NA
k127_1007917	k127_1007917_44	NA
k127_1007917	k127_1007917_5	NA
k127_1007917	k127_1007917_6	NA
k127_1007917	k127_1007917_7	NA
k127_1007917	k127_1007917_8	NA
k127_1007917	k127_1007917_9	NA
k127_100803	k127_100803_1	K01874
k127_100803	k127_100803_2	K04079
k127_1008097	k127_1008097_1	NA
k127_1008097	k127_1008097_2	NA
k127_1008097	k127_1008097_3	NA
k127_1008695	k127_1008695_1	NA
k127_1008695	k127_1008695_10	K01610
k127_1008695	k127_1008695_11	NA
k127_1008695	k127_1008695_12	NA
k127_1008695	k127_1008695_13	K06381
k127_1008695	k127_1008695_14	NA
k127_1008695	k127_1008695_15	NA
k127_1008695	k127_1008695_16	NA
k127_1008695	k127_1008695_17	K04771
k127_1008695	k127_1008695_18	K01142
k127_1008695	k127_1008695_19	NA
k127_1008695	k127_1008695_2	K03768
k127_1008695	k127_1008695_20	NA
k127_1008695	k127_1008695_21	NA
k127_1008695	k127_1008695_22	NA
k127_1008695	k127_1008695_23	K09861
k127_1008695	k127_1008695_24	NA
k127_1008695	k127_1008695_25	NA
k127_1008695	k127_1008695_3	K01785
k127_1008695	k127_1008695_4	K07258
k127_1008695	k127_1008695_5	NA
k127_1008695	k127_1008695_6	NA
k127_1008695	k127_1008695_7	K21745
k127_1008695	k127_1008695_8	NA
k127_1008695	k127_1008695_9	NA
k127_1008851	k127_1008851_1	NA
k127_1008851	k127_1008851_10	NA
k127_1008851	k127_1008851_11	NA
k127_1008851	k127_1008851_12	NA
k127_1008851	k127_1008851_13	NA
k127_1008851	k127_1008851_14	NA
k127_1008851	k127_1008851_15	NA
k127_1008851	k127_1008851_16	NA
k127_1008851	k127_1008851_17	NA
k127_1008851	k127_1008851_18	K07284
k127_1008851	k127_1008851_19	NA
k127_1008851	k127_1008851_2	NA
k127_1008851	k127_1008851_20	K03497
k127_1008851	k127_1008851_21	K03496
k127_1008851	k127_1008851_22	NA
k127_1008851	k127_1008851_23	NA
k127_1008851	k127_1008851_24	NA
k127_1008851	k127_1008851_25	K06400
k127_1008851	k127_1008851_26	NA
k127_1008851	k127_1008851_27	NA
k127_1008851	k127_1008851_28	NA
k127_1008851	k127_1008851_29	NA
k127_1008851	k127_1008851_3	K06400
k127_1008851	k127_1008851_30	NA
k127_1008851	k127_1008851_31	NA
k127_1008851	k127_1008851_32	K07727
k127_1008851	k127_1008851_4	NA
k127_1008851	k127_1008851_5	K03497
k127_1008851	k127_1008851_6	NA
k127_1008851	k127_1008851_7	NA
k127_1008851	k127_1008851_8	NA
k127_1008851	k127_1008851_9	NA
k127_1008923	k127_1008923_1	K03431
k127_1009403	k127_1009403_1	NA
k127_1009403	k127_1009403_2	NA
k127_1009403	k127_1009403_3	NA
k127_1009464	k127_1009464_1	K03497
k127_1009498	k127_1009498_1	NA
k127_1009498	k127_1009498_2	K03497
k127_1009507	k127_1009507_1	K03655
k127_1009687	k127_1009687_1	NA
k127_1009687	k127_1009687_2	NA
k127_1009687	k127_1009687_3	NA
k127_1009687	k127_1009687_4	NA
k127_1009706	k127_1009706_1	NA
k127_1009706	k127_1009706_10	K07058
k127_1009706	k127_1009706_11	K06381
k127_1009706	k127_1009706_12	NA
k127_1009706	k127_1009706_13	K01785
k127_1009706	k127_1009706_14	NA
k127_1009706	k127_1009706_15	K01610
k127_1009706	k127_1009706_16	K01733
k127_1009706	k127_1009706_17	K01449
k127_1009706	k127_1009706_18	NA
k127_1009706	k127_1009706_19	K01649
k127_1009706	k127_1009706_2	NA
k127_1009706	k127_1009706_20	NA
k127_1009706	k127_1009706_21	NA
k127_1009706	k127_1009706_22	NA
k127_1009706	k127_1009706_3	NA
k127_1009706	k127_1009706_4	NA
k127_1009706	k127_1009706_5	NA
k127_1009706	k127_1009706_6	K07568
k127_1009706	k127_1009706_7	NA
k127_1009706	k127_1009706_8	K01890
k127_1009706	k127_1009706_9	K01889
k127_1009738	k127_1009738_1	K03784
k127_1009738	k127_1009738_2	NA
k127_1009738	k127_1009738_3	K09779
k127_1009789	k127_1009789_1	NA
k127_1009789	k127_1009789_2	NA
k127_1009896	k127_1009896_1	K04041
k127_1009913	k127_1009913_1	K02761
k127_1009913	k127_1009913_2	K01223
k127_1010056	k127_1010056_1	NA
k127_1010056	k127_1010056_2	NA
k127_1010211	k127_1010211_1	NA
k127_1010211	k127_1010211_2	K01193
k127_1010211	k127_1010211_3	K25088
k127_1010211	k127_1010211_4	K25087
k127_1010211	k127_1010211_5	K25086
k127_1010211	k127_1010211_6	K03484
k127_1010211	k127_1010211_7	K01835
k127_1010305	k127_1010305_1	NA
k127_1010583	k127_1010583_1	NA
k127_1010673	k127_1010673_1	K02007
k127_1010673	k127_1010673_2	K06864
k127_1010779	k127_1010779_1	NA
k127_1010779	k127_1010779_2	NA
k127_1010779	k127_1010779_3	NA
k127_1010779	k127_1010779_4	NA
k127_1010779	k127_1010779_5	K03831
k127_1010808	k127_1010808_1	K07484
k127_1010809	k127_1010809_1	NA
k127_1010975	k127_1010975_1	K01874
k127_1010984	k127_1010984_1	NA
k127_1010984	k127_1010984_2	NA
k127_1010984	k127_1010984_3	NA
k127_1010984	k127_1010984_4	NA
k127_1010984	k127_1010984_5	NA
k127_1010984	k127_1010984_6	NA
k127_1010984	k127_1010984_7	K06400
k127_1011142	k127_1011142_1	NA
k127_1011161	k127_1011161_1	K06402
k127_1011161	k127_1011161_2	NA
k127_1011161	k127_1011161_3	NA
k127_1011161	k127_1011161_4	K00266
k127_1011161	k127_1011161_5	K00528
k127_1011161	k127_1011161_6	NA
k127_1011161	k127_1011161_7	K06398
k127_1011161	k127_1011161_8	NA
k127_1011161	k127_1011161_9	NA
k127_1011292	k127_1011292_1	NA
k127_1011474	k127_1011474_1	K02337
k127_1011474	k127_1011474_10	K01749
k127_1011474	k127_1011474_11	K13542
k127_1011474	k127_1011474_2	K00850
k127_1011474	k127_1011474_3	K00873
k127_1011474	k127_1011474_4	K01607
k127_1011474	k127_1011474_5	NA
k127_1011474	k127_1011474_6	NA
k127_1011474	k127_1011474_7	K01950
k127_1011474	k127_1011474_8	K01356
k127_1011474	k127_1011474_9	K24866
k127_10119	k127_10119_1	K14273
k127_10119	k127_10119_2	NA
k127_1011916	k127_1011916_1	NA
k127_1011916	k127_1011916_2	NA
k127_1011953	k127_1011953_1	NA
k127_1011953	k127_1011953_2	NA
k127_1011953	k127_1011953_3	NA
k127_1011953	k127_1011953_4	K07124
k127_1011953	k127_1011953_5	NA
k127_1011953	k127_1011953_6	NA
k127_1011953	k127_1011953_7	NA
k127_1012087	k127_1012087_1	NA
k127_1012087	k127_1012087_2	NA
k127_1012087	k127_1012087_3	NA
k127_1012156	k127_1012156_1	NA
k127_1012185	k127_1012185_1	K03569
k127_1012185	k127_1012185_2	K03581
k127_1012185	k127_1012185_3	NA
k127_1012732	k127_1012732_1	K01933
k127_1012732	k127_1012732_2	NA
k127_1013	k127_1013_1	NA
k127_1013108	k127_1013108_1	NA
k127_1013108	k127_1013108_10	NA
k127_1013108	k127_1013108_11	NA
k127_1013108	k127_1013108_12	NA
k127_1013108	k127_1013108_2	NA
k127_1013108	k127_1013108_3	K00008
k127_1013108	k127_1013108_4	NA
k127_1013108	k127_1013108_5	K01783
k127_1013108	k127_1013108_6	NA
k127_1013108	k127_1013108_7	NA
k127_1013108	k127_1013108_8	NA
k127_1013108	k127_1013108_9	NA
k127_1013380	k127_1013380_1	K24180
k127_1013528	k127_1013528_1	NA
k127_1013534	k127_1013534_1	NA
k127_10139	k127_10139_1	K10439
k127_1014255	k127_1014255_1	NA
k127_1014255	k127_1014255_2	NA
k127_1014255	k127_1014255_3	NA
k127_1014294	k127_1014294_1	NA
k127_101430	k127_101430_1	K12478
k127_1014456	k127_1014456_1	NA
k127_1014456	k127_1014456_2	NA
k127_101458	k127_101458_1	NA
k127_101458	k127_101458_2	NA
k127_101458	k127_101458_3	NA
k127_1014892	k127_1014892_1	NA
k127_1014892	k127_1014892_2	NA
k127_1014892	k127_1014892_3	NA
k127_1015159	k127_1015159_1	K03701
k127_1015390	k127_1015390_1	NA
k127_1015534	k127_1015534_1	K09988
k127_1015534	k127_1015534_2	K01192
k127_1015534	k127_1015534_3	K01192
k127_1015534	k127_1015534_4	K19868
k127_1015534	k127_1015534_5	K02529
k127_1015534	k127_1015534_6	NA
k127_1015534	k127_1015534_7	K00876
k127_1015534	k127_1015534_8	NA
k127_1015589	k127_1015589_1	NA
k127_1015592	k127_1015592_1	NA
k127_1015592	k127_1015592_2	NA
k127_1015592	k127_1015592_3	NA
k127_1015592	k127_1015592_4	NA
k127_1015601	k127_1015601_1	NA
k127_1015626	k127_1015626_1	NA
k127_1015658	k127_1015658_1	K03973
k127_1015658	k127_1015658_2	NA
k127_1015986	k127_1015986_1	K01878
k127_1016091	k127_1016091_1	K10439
k127_1016091	k127_1016091_2	K10441
k127_1016468	k127_1016468_1	NA
k127_1016468	k127_1016468_2	NA
k127_1016468	k127_1016468_3	NA
k127_1016468	k127_1016468_4	NA
k127_1016468	k127_1016468_5	NA
k127_1016468	k127_1016468_6	NA
k127_1016468	k127_1016468_7	NA
k127_1016468	k127_1016468_8	NA
k127_1016488	k127_1016488_1	K00558
k127_1016488	k127_1016488_2	NA
k127_1016496	k127_1016496_1	NA
k127_1016501	k127_1016501_1	K12132
k127_1016683	k127_1016683_1	K06400
k127_1016974	k127_1016974_1	NA
k127_1016974	k127_1016974_10	NA
k127_1016974	k127_1016974_11	NA
k127_1016974	k127_1016974_12	NA
k127_1016974	k127_1016974_13	K14437
k127_1016974	k127_1016974_14	NA
k127_1016974	k127_1016974_15	K18345
k127_1016974	k127_1016974_2	K12856
k127_1016974	k127_1016974_3	NA
k127_1016974	k127_1016974_4	NA
k127_1016974	k127_1016974_5	NA
k127_1016974	k127_1016974_6	K01613
k127_1016974	k127_1016974_7	K17103
k127_1016974	k127_1016974_8	NA
k127_1016974	k127_1016974_9	K02483
k127_1017379	k127_1017379_1	NA
k127_1017379	k127_1017379_2	NA
k127_1017379	k127_1017379_3	NA
k127_1018024	k127_1018024_1	NA
k127_1018024	k127_1018024_2	NA
k127_1018024	k127_1018024_3	K01091
k127_1018024	k127_1018024_4	K06206
k127_1018024	k127_1018024_5	K03575
k127_1018024	k127_1018024_6	NA
k127_101806	k127_101806_1	NA
k127_1018201	k127_1018201_1	NA
k127_1018209	k127_1018209_1	NA
k127_1018328	k127_1018328_1	NA
k127_1018328	k127_1018328_2	K01571
k127_1018328	k127_1018328_3	K20509
k127_1018328	k127_1018328_4	K23351
k127_1018328	k127_1018328_5	NA
k127_1018328	k127_1018328_6	K01604
k127_1018328	k127_1018328_7	K07258
k127_1018459	k127_1018459_1	K02052
k127_1018459	k127_1018459_2	NA
k127_1018502	k127_1018502_1	NA
k127_1018502	k127_1018502_2	NA
k127_1018502	k127_1018502_3	NA
k127_1018502	k127_1018502_4	NA
k127_1018760	k127_1018760_1	NA
k127_1018760	k127_1018760_2	NA
k127_101926	k127_101926_1	NA
k127_101926	k127_101926_2	NA
k127_101926	k127_101926_3	NA
k127_1019347	k127_1019347_1	NA
k127_1019347	k127_1019347_2	K03497
k127_1019433	k127_1019433_1	NA
k127_1019433	k127_1019433_2	K00645
k127_101964	k127_101964_1	K01736
k127_101964	k127_101964_2	K07404
k127_1019713	k127_1019713_1	NA
k127_1019713	k127_1019713_2	NA
k127_1019713	k127_1019713_3	NA
k127_1019811	k127_1019811_1	K06442
k127_1019811	k127_1019811_2	K00858
k127_1019811	k127_1019811_3	K03402
k127_1020182	k127_1020182_1	K07502
k127_1020182	k127_1020182_2	NA
k127_1020182	k127_1020182_3	K04763
k127_1020182	k127_1020182_4	NA
k127_1020309	k127_1020309_1	K07738
k127_1020309	k127_1020309_10	NA
k127_1020309	k127_1020309_11	K25148
k127_1020309	k127_1020309_12	NA
k127_1020309	k127_1020309_13	K03429
k127_1020309	k127_1020309_14	NA
k127_1020309	k127_1020309_15	NA
k127_1020309	k127_1020309_16	NA
k127_1020309	k127_1020309_17	K07027
k127_1020309	k127_1020309_18	NA
k127_1020309	k127_1020309_19	K07027
k127_1020309	k127_1020309_2	NA
k127_1020309	k127_1020309_20	K03310
k127_1020309	k127_1020309_21	NA
k127_1020309	k127_1020309_22	K01066
k127_1020309	k127_1020309_23	NA
k127_1020309	k127_1020309_24	NA
k127_1020309	k127_1020309_25	NA
k127_1020309	k127_1020309_26	NA
k127_1020309	k127_1020309_27	K01421
k127_1020309	k127_1020309_28	NA
k127_1020309	k127_1020309_29	NA
k127_1020309	k127_1020309_3	K03074
k127_1020309	k127_1020309_30	NA
k127_1020309	k127_1020309_31	NA
k127_1020309	k127_1020309_32	K12410
k127_1020309	k127_1020309_33	NA
k127_1020309	k127_1020309_34	NA
k127_1020309	k127_1020309_35	K06405
k127_1020309	k127_1020309_36	K06406
k127_1020309	k127_1020309_37	NA
k127_1020309	k127_1020309_38	NA
k127_1020309	k127_1020309_39	NA
k127_1020309	k127_1020309_4	K03072
k127_1020309	k127_1020309_40	K02539
k127_1020309	k127_1020309_41	NA
k127_1020309	k127_1020309_42	K00661
k127_1020309	k127_1020309_43	K14415
k127_1020309	k127_1020309_44	NA
k127_1020309	k127_1020309_45	NA
k127_1020309	k127_1020309_46	K18888
k127_1020309	k127_1020309_47	K18887
k127_1020309	k127_1020309_48	NA
k127_1020309	k127_1020309_49	NA
k127_1020309	k127_1020309_5	NA
k127_1020309	k127_1020309_50	K06409
k127_1020309	k127_1020309_51	K21636
k127_1020309	k127_1020309_52	K04068
k127_1020309	k127_1020309_6	K01893
k127_1020309	k127_1020309_7	K19271
k127_1020309	k127_1020309_8	K03310
k127_1020309	k127_1020309_9	NA
k127_1020310	k127_1020310_1	NA
k127_1020310	k127_1020310_2	NA
k127_1020384	k127_1020384_1	NA
k127_1020403	k127_1020403_1	K24297
k127_1020481	k127_1020481_1	NA
k127_1020859	k127_1020859_1	NA
k127_1020859	k127_1020859_2	NA
k127_1020859	k127_1020859_3	K07727
k127_1020859	k127_1020859_4	NA
k127_1021023	k127_1021023_1	K01689
k127_1021702	k127_1021702_1	NA
k127_1021702	k127_1021702_2	K00700
k127_10218	k127_10218_1	NA
k127_10218	k127_10218_10	K00764
k127_10218	k127_10218_11	K01867
k127_10218	k127_10218_12	K04023
k127_10218	k127_10218_13	NA
k127_10218	k127_10218_14	K02770
k127_10218	k127_10218_15	NA
k127_10218	k127_10218_2	K01197
k127_10218	k127_10218_3	NA
k127_10218	k127_10218_4	NA
k127_10218	k127_10218_5	NA
k127_10218	k127_10218_6	NA
k127_10218	k127_10218_7	NA
k127_10218	k127_10218_8	NA
k127_10218	k127_10218_9	NA
k127_1021813	k127_1021813_1	K03470
k127_1021813	k127_1021813_2	K07460
k127_1021813	k127_1021813_3	K05810
k127_1022014	k127_1022014_1	NA
k127_1022014	k127_1022014_10	NA
k127_1022014	k127_1022014_11	K06400
k127_1022014	k127_1022014_12	NA
k127_1022014	k127_1022014_13	NA
k127_1022014	k127_1022014_14	NA
k127_1022014	k127_1022014_15	NA
k127_1022014	k127_1022014_16	NA
k127_1022014	k127_1022014_2	NA
k127_1022014	k127_1022014_3	NA
k127_1022014	k127_1022014_4	NA
k127_1022014	k127_1022014_5	K05349
k127_1022014	k127_1022014_6	NA
k127_1022014	k127_1022014_7	NA
k127_1022014	k127_1022014_8	NA
k127_1022014	k127_1022014_9	NA
k127_1022189	k127_1022189_1	NA
k127_102225	k127_102225_1	NA
k127_102225	k127_102225_2	NA
k127_1022250	k127_1022250_1	K02517
k127_1022250	k127_1022250_2	K13041
k127_1022406	k127_1022406_1	K00850
k127_1022406	k127_1022406_2	NA
k127_1022440	k127_1022440_1	NA
k127_1022509	k127_1022509_1	NA
k127_1022509	k127_1022509_2	NA
k127_1022509	k127_1022509_3	NA
k127_1022509	k127_1022509_4	K02315
k127_1022509	k127_1022509_5	NA
k127_1022621	k127_1022621_1	K00820
k127_1023149	k127_1023149_1	NA
k127_1023149	k127_1023149_2	NA
k127_1023261	k127_1023261_1	NA
k127_1023368	NA	NA
k127_1023369	k127_1023369_1	K07484
k127_1023380	k127_1023380_1	NA
k127_1023380	k127_1023380_2	NA
k127_1023473	k127_1023473_1	K24258
k127_1023473	k127_1023473_2	K08678
k127_1023473	k127_1023473_3	NA
k127_1023473	k127_1023473_4	K06168
k127_1023473	k127_1023473_5	K03555
k127_1023473	k127_1023473_6	K03572
k127_1023473	k127_1023473_7	K00791
k127_1023473	k127_1023473_8	NA
k127_1023481	k127_1023481_1	K25261
k127_1023481	k127_1023481_2	K25261
k127_1023481	k127_1023481_3	NA
k127_102369	k127_102369_1	NA
k127_1024315	k127_1024315_1	NA
k127_1024374	k127_1024374_1	K00384
k127_1024374	k127_1024374_2	K21636
k127_1024407	k127_1024407_1	NA
k127_1024407	k127_1024407_2	NA
k127_1024407	k127_1024407_3	NA
k127_1024407	k127_1024407_4	NA
k127_1024439	k127_1024439_1	NA
k127_1024439	k127_1024439_2	NA
k127_1024439	k127_1024439_3	NA
k127_1024478	k127_1024478_1	NA
k127_1024478	k127_1024478_2	K04072
k127_1024489	k127_1024489_1	K01740
k127_1024489	k127_1024489_2	K17472
k127_1024489	k127_1024489_3	NA
k127_1024489	k127_1024489_4	K03704
k127_1024489	k127_1024489_5	NA
k127_1024489	k127_1024489_6	K01912
k127_1024489	k127_1024489_7	NA
k127_1024905	k127_1024905_1	K00763
k127_1024905	k127_1024905_2	K02967
k127_1024905	k127_1024905_3	K02357
k127_102494	k127_102494_1	K01880
k127_1025042	k127_1025042_1	K01267
k127_1025220	k127_1025220_1	NA
k127_1025220	k127_1025220_2	K00943
k127_1025220	k127_1025220_3	NA
k127_102531	k127_102531_1	NA
k127_1025363	k127_1025363_1	NA
k127_1025363	k127_1025363_2	K01872
k127_1025394	k127_1025394_1	NA
k127_1025681	k127_1025681_1	NA
k127_1025681	k127_1025681_2	K04655
k127_1025848	k127_1025848_1	NA
k127_1025936	k127_1025936_1	K19405
k127_1025936	k127_1025936_2	K03696
k127_1026215	k127_1026215_1	NA
k127_1026215	k127_1026215_2	K02114
k127_1026297	k127_1026297_1	NA
k127_1026312	k127_1026312_1	NA
k127_1026427	k127_1026427_1	NA
k127_1026456	k127_1026456_1	NA
k127_1026456	k127_1026456_2	NA
k127_1026456	k127_1026456_3	NA
k127_1026456	k127_1026456_4	NA
k127_1026456	k127_1026456_5	K06400
k127_1026597	k127_1026597_1	NA
k127_1027387	k127_1027387_1	K07566
k127_1027493	k127_1027493_1	NA
k127_1027493	k127_1027493_10	K01696
k127_1027493	k127_1027493_11	K01817
k127_1027493	k127_1027493_12	K01609
k127_1027493	k127_1027493_13	K00766
k127_1027493	k127_1027493_14	NA
k127_1027493	k127_1027493_15	NA
k127_1027493	k127_1027493_16	K01952
k127_1027493	k127_1027493_17	NA
k127_1027493	k127_1027493_18	K12259
k127_1027493	k127_1027493_19	NA
k127_1027493	k127_1027493_2	NA
k127_1027493	k127_1027493_20	NA
k127_1027493	k127_1027493_21	NA
k127_1027493	k127_1027493_22	NA
k127_1027493	k127_1027493_23	K08177
k127_1027493	k127_1027493_24	K01176
k127_1027493	k127_1027493_25	K15772
k127_1027493	k127_1027493_26	K15771
k127_1027493	k127_1027493_27	K15770
k127_1027493	k127_1027493_28	K05499
k127_1027493	k127_1027493_29	K01224
k127_1027493	k127_1027493_3	NA
k127_1027493	k127_1027493_30	NA
k127_1027493	k127_1027493_31	NA
k127_1027493	k127_1027493_32	K01224
k127_1027493	k127_1027493_33	NA
k127_1027493	k127_1027493_34	NA
k127_1027493	k127_1027493_35	K02238
k127_1027493	k127_1027493_36	K03406
k127_1027493	k127_1027493_37	NA
k127_1027493	k127_1027493_38	K21929
k127_1027493	k127_1027493_39	NA
k127_1027493	k127_1027493_4	K01887
k127_1027493	k127_1027493_5	K09765
k127_1027493	k127_1027493_6	NA
k127_1027493	k127_1027493_7	K01955
k127_1027493	k127_1027493_8	K01956
k127_1027493	k127_1027493_9	K01695
k127_1027529	k127_1027529_1	NA
k127_1027529	k127_1027529_2	NA
k127_1027529	k127_1027529_3	NA
k127_1027614	k127_1027614_1	K19955
k127_1027614	k127_1027614_2	NA
k127_1028082	k127_1028082_1	NA
k127_1028082	k127_1028082_2	NA
k127_1028082	k127_1028082_3	NA
k127_1028206	k127_1028206_1	NA
k127_1028206	k127_1028206_2	NA
k127_1028206	k127_1028206_3	NA
k127_1028422	k127_1028422_1	K07483
k127_1028422	k127_1028422_2	NA
k127_1028422	k127_1028422_3	NA
k127_1028422	k127_1028422_4	NA
k127_1028422	k127_1028422_5	NA
k127_1028422	k127_1028422_6	NA
k127_1028422	k127_1028422_7	K07491
k127_1028422	k127_1028422_8	NA
k127_1028696	k127_1028696_1	NA
k127_1028696	k127_1028696_2	NA
k127_1028696	k127_1028696_3	NA
k127_1028779	k127_1028779_1	NA
k127_1028779	k127_1028779_2	NA
k127_1028779	k127_1028779_3	NA
k127_1028851	k127_1028851_1	NA
k127_1028851	k127_1028851_2	NA
k127_1028851	k127_1028851_3	NA
k127_1028851	k127_1028851_4	NA
k127_102900	k127_102900_1	NA
k127_1029819	k127_1029819_1	NA
k127_1029819	k127_1029819_2	NA
k127_1029819	k127_1029819_3	NA
k127_1029819	k127_1029819_4	NA
k127_1029819	k127_1029819_5	NA
k127_1029819	k127_1029819_6	NA
k127_1029843	k127_1029843_1	NA
k127_1029843	k127_1029843_10	NA
k127_1029843	k127_1029843_100	NA
k127_1029843	k127_1029843_101	NA
k127_1029843	k127_1029843_102	NA
k127_1029843	k127_1029843_103	NA
k127_1029843	k127_1029843_104	NA
k127_1029843	k127_1029843_105	K03154
k127_1029843	k127_1029843_106	K03148
k127_1029843	k127_1029843_107	K03149
k127_1029843	k127_1029843_108	K03150
k127_1029843	k127_1029843_109	K00788
k127_1029843	k127_1029843_11	NA
k127_1029843	k127_1029843_110	K07133
k127_1029843	k127_1029843_111	K01596
k127_1029843	k127_1029843_112	NA
k127_1029843	k127_1029843_113	NA
k127_1029843	k127_1029843_114	NA
k127_1029843	k127_1029843_115	NA
k127_1029843	k127_1029843_116	K23351
k127_1029843	k127_1029843_117	K20509
k127_1029843	k127_1029843_118	K01571
k127_1029843	k127_1029843_119	K00832
k127_1029843	k127_1029843_12	K03090
k127_1029843	k127_1029843_13	K06379
k127_1029843	k127_1029843_14	K02469
k127_1029843	k127_1029843_15	K02470
k127_1029843	k127_1029843_16	K03629
k127_1029843	k127_1029843_17	K02338
k127_1029843	k127_1029843_18	K02313
k127_1029843	k127_1029843_19	K02914
k127_1029843	k127_1029843_2	NA
k127_1029843	k127_1029843_20	K03536
k127_1029843	k127_1029843_21	K03217
k127_1029843	k127_1029843_22	K06346
k127_1029843	k127_1029843_23	K03650
k127_1029843	k127_1029843_24	K03495
k127_1029843	k127_1029843_25	K03501
k127_1029843	k127_1029843_26	K03497
k127_1029843	k127_1029843_27	K03496
k127_1029843	k127_1029843_28	K03497
k127_1029843	k127_1029843_29	NA
k127_1029843	k127_1029843_3	NA
k127_1029843	k127_1029843_30	K22927
k127_1029843	k127_1029843_31	K02939
k127_1029843	k127_1029843_32	K02314
k127_1029843	k127_1029843_33	NA
k127_1029843	k127_1029843_34	NA
k127_1029843	k127_1029843_35	NA
k127_1029843	k127_1029843_36	NA
k127_1029843	k127_1029843_37	NA
k127_1029843	k127_1029843_38	NA
k127_1029843	k127_1029843_39	K05985
k127_1029843	k127_1029843_4	NA
k127_1029843	k127_1029843_40	K02528
k127_1029843	k127_1029843_41	NA
k127_1029843	k127_1029843_42	NA
k127_1029843	k127_1029843_43	K01735
k127_1029843	k127_1029843_44	K03748
k127_1029843	k127_1029843_45	NA
k127_1029843	k127_1029843_46	NA
k127_1029843	k127_1029843_47	NA
k127_1029843	k127_1029843_48	NA
k127_1029843	k127_1029843_49	K07491
k127_1029843	k127_1029843_5	NA
k127_1029843	k127_1029843_50	NA
k127_1029843	k127_1029843_51	K03469
k127_1029843	k127_1029843_52	NA
k127_1029843	k127_1029843_53	K00783
k127_1029843	k127_1029843_54	NA
k127_1029843	k127_1029843_55	NA
k127_1029843	k127_1029843_56	NA
k127_1029843	k127_1029843_57	NA
k127_1029843	k127_1029843_58	NA
k127_1029843	k127_1029843_59	K03499
k127_1029843	k127_1029843_6	NA
k127_1029843	k127_1029843_60	K03498
k127_1029843	k127_1029843_61	NA
k127_1029843	k127_1029843_62	NA
k127_1029843	k127_1029843_63	K01439
k127_1029843	k127_1029843_64	NA
k127_1029843	k127_1029843_65	NA
k127_1029843	k127_1029843_66	NA
k127_1029843	k127_1029843_67	NA
k127_1029843	k127_1029843_68	NA
k127_1029843	k127_1029843_69	NA
k127_1029843	k127_1029843_7	NA
k127_1029843	k127_1029843_70	K06714
k127_1029843	k127_1029843_71	K21672
k127_1029843	k127_1029843_72	K21399
k127_1029843	k127_1029843_73	K21400
k127_1029843	k127_1029843_74	K17899
k127_1029843	k127_1029843_75	K17898
k127_1029843	k127_1029843_76	NA
k127_1029843	k127_1029843_77	NA
k127_1029843	k127_1029843_78	K21898
k127_1029843	k127_1029843_79	NA
k127_1029843	k127_1029843_8	NA
k127_1029843	k127_1029843_80	K00812
k127_1029843	k127_1029843_81	NA
k127_1029843	k127_1029843_82	NA
k127_1029843	k127_1029843_83	K00548
k127_1029843	k127_1029843_84	NA
k127_1029843	k127_1029843_85	K02035
k127_1029843	k127_1029843_86	K02033
k127_1029843	k127_1029843_87	K02034
k127_1029843	k127_1029843_88	K02031
k127_1029843	k127_1029843_89	K02032
k127_1029843	k127_1029843_9	K10947
k127_1029843	k127_1029843_90	NA
k127_1029843	k127_1029843_91	NA
k127_1029843	k127_1029843_92	NA
k127_1029843	k127_1029843_93	NA
k127_1029843	k127_1029843_94	NA
k127_1029843	k127_1029843_95	NA
k127_1029843	k127_1029843_96	NA
k127_1029843	k127_1029843_97	K07486
k127_1029843	k127_1029843_98	NA
k127_1029843	k127_1029843_99	NA
k127_1030079	k127_1030079_1	NA
k127_1030079	k127_1030079_2	NA
k127_1030079	k127_1030079_3	K01465
k127_1030079	k127_1030079_4	NA
k127_1030079	k127_1030079_5	NA
k127_1030079	k127_1030079_6	NA
k127_1030079	k127_1030079_7	NA
k127_1030079	k127_1030079_8	K00074
k127_1030294	k127_1030294_1	K02959
k127_1030294	k127_1030294_10	K07042
k127_1030294	k127_1030294_11	K06217
k127_1030294	k127_1030294_12	K06438
k127_1030294	k127_1030294_13	NA
k127_1030294	k127_1030294_14	NA
k127_1030294	k127_1030294_15	NA
k127_1030294	k127_1030294_16	NA
k127_1030294	k127_1030294_17	NA
k127_1030294	k127_1030294_18	NA
k127_1030294	k127_1030294_19	K01868
k127_1030294	k127_1030294_2	K03106
k127_1030294	k127_1030294_20	K18682
k127_1030294	k127_1030294_21	K09769
k127_1030294	k127_1030294_22	K07030
k127_1030294	k127_1030294_23	K03655
k127_1030294	k127_1030294_24	NA
k127_1030294	k127_1030294_25	NA
k127_1030294	k127_1030294_26	K04759
k127_1030294	k127_1030294_27	K04758
k127_1030294	k127_1030294_28	K04758
k127_1030294	k127_1030294_29	K03709
k127_1030294	k127_1030294_3	K09787
k127_1030294	k127_1030294_30	NA
k127_1030294	k127_1030294_31	K03839
k127_1030294	k127_1030294_32	NA
k127_1030294	k127_1030294_33	K00763
k127_1030294	k127_1030294_34	NA
k127_1030294	k127_1030294_35	K07217
k127_1030294	k127_1030294_36	K07258
k127_1030294	k127_1030294_37	NA
k127_1030294	k127_1030294_38	K16921
k127_1030294	k127_1030294_39	K07979
k127_1030294	k127_1030294_4	NA
k127_1030294	k127_1030294_40	K01537
k127_1030294	k127_1030294_41	NA
k127_1030294	k127_1030294_42	K05847
k127_1030294	k127_1030294_43	K05845
k127_1030294	k127_1030294_43	K05846
k127_1030294	k127_1030294_44	K07027
k127_1030294	k127_1030294_5	K07456
k127_1030294	k127_1030294_6	K03584
k127_1030294	k127_1030294_7	NA
k127_1030294	k127_1030294_8	K03595
k127_1030294	k127_1030294_9	NA
k127_1030675	k127_1030675_1	NA
k127_1030675	k127_1030675_2	NA
k127_1030742	k127_1030742_1	NA
k127_1030742	k127_1030742_2	NA
k127_1030769	k127_1030769_1	NA
k127_1030938	k127_1030938_1	NA
k127_1030938	k127_1030938_2	NA
k127_1031148	k127_1031148_1	K00088
k127_1031148	k127_1031148_2	K01447
k127_1031148	k127_1031148_3	K11176
k127_1031148	k127_1031148_4	K00602
k127_1031148	k127_1031148_5	NA
k127_1031341	k127_1031341_1	K02031
k127_1031341	k127_1031341_2	K02032
k127_1031341	k127_1031341_3	K02033
k127_1031373	k127_1031373_1	NA
k127_1031373	k127_1031373_2	NA
k127_1031373	k127_1031373_3	NA
k127_1031373	k127_1031373_4	NA
k127_1031373	k127_1031373_5	NA
k127_1031373	k127_1031373_6	K05770
k127_1031373	k127_1031373_7	K04517
k127_1031373	k127_1031373_8	K02355
k127_103141	k127_103141_1	NA
k127_103141	k127_103141_2	NA
k127_1031415	k127_1031415_1	NA
k127_1031415	k127_1031415_2	NA
k127_1031600	k127_1031600_1	NA
k127_1031600	k127_1031600_2	NA
k127_1031600	k127_1031600_3	NA
k127_1031600	k127_1031600_4	NA
k127_1031600	k127_1031600_5	K06334
k127_1031722	k127_1031722_1	NA
k127_1031722	k127_1031722_2	NA
k127_1031722	k127_1031722_3	K02434
k127_103174	k127_103174_1	NA
k127_103174	k127_103174_2	NA
k127_103174	k127_103174_3	K00995
k127_103194	k127_103194_1	K06400
k127_103194	k127_103194_2	NA
k127_103194	k127_103194_3	NA
k127_103194	k127_103194_4	K17733
k127_103194	k127_103194_5	NA
k127_1032068	k127_1032068_1	NA
k127_1032068	k127_1032068_2	K00655
k127_1032068	k127_1032068_3	K00945
k127_1032068	k127_1032068_4	NA
k127_103214	k127_103214_1	NA
k127_103214	k127_103214_2	NA
k127_103214	k127_103214_3	NA
k127_103217	k127_103217_1	NA
k127_1032593	k127_1032593_1	NA
k127_1032593	k127_1032593_2	NA
k127_1032593	k127_1032593_3	NA
k127_1032593	k127_1032593_4	NA
k127_1032593	k127_1032593_5	K20223
k127_1032593	k127_1032593_6	NA
k127_103272	k127_103272_1	NA
k127_103272	k127_103272_2	K07718
k127_1032842	k127_1032842_1	NA
k127_1032842	k127_1032842_2	NA
k127_1032842	k127_1032842_3	NA
k127_1032862	k127_1032862_1	NA
k127_1032952	k127_1032952_1	NA
k127_1033	k127_1033_1	K02316
k127_1033	k127_1033_2	K03086
k127_1033	k127_1033_3	K00567
k127_1033	k127_1033_4	NA
k127_1033	k127_1033_5	K03569
k127_1033	k127_1033_6	K03570
k127_1033	k127_1033_7	NA
k127_1033	k127_1033_8	K05515
k127_1033	k127_1033_9	K05837
k127_1033047	k127_1033047_1	NA
k127_1033047	k127_1033047_2	NA
k127_1033047	k127_1033047_3	NA
k127_1033047	k127_1033047_4	NA
k127_1033047	k127_1033047_5	NA
k127_1033259	k127_1033259_1	K07462
k127_1033408	k127_1033408_1	NA
k127_1033408	k127_1033408_2	K01142
k127_1033408	k127_1033408_3	K01142
k127_1033408	k127_1033408_4	NA
k127_1033459	k127_1033459_1	NA
k127_1033459	k127_1033459_2	NA
k127_1033459	k127_1033459_3	NA
k127_1033459	k127_1033459_4	K00661
k127_1033459	k127_1033459_5	NA
k127_1033459	k127_1033459_6	K02217
k127_1033459	k127_1033459_7	NA
k127_1033561	k127_1033561_1	K07727
k127_1033561	k127_1033561_10	K12940
k127_1033561	k127_1033561_11	K03564
k127_1033561	k127_1033561_12	NA
k127_1033561	k127_1033561_13	K07727
k127_1033561	k127_1033561_14	NA
k127_1033561	k127_1033561_15	NA
k127_1033561	k127_1033561_16	NA
k127_1033561	k127_1033561_17	K09787
k127_1033561	k127_1033561_18	K03106
k127_1033561	k127_1033561_19	K02959
k127_1033561	k127_1033561_2	NA
k127_1033561	k127_1033561_20	K06960
k127_1033561	k127_1033561_21	K02860
k127_1033561	k127_1033561_22	K00554
k127_1033561	k127_1033561_23	NA
k127_1033561	k127_1033561_24	K02884
k127_1033561	k127_1033561_25	K03100
k127_1033561	k127_1033561_26	K14540
k127_1033561	k127_1033561_27	K03470
k127_1033561	k127_1033561_28	K07460
k127_1033561	k127_1033561_29	K05810
k127_1033561	k127_1033561_3	K03496
k127_1033561	k127_1033561_30	K06421
k127_1033561	k127_1033561_31	K08316
k127_1033561	k127_1033561_32	K00954
k127_1033561	k127_1033561_33	NA
k127_1033561	k127_1033561_34	NA
k127_1033561	k127_1033561_35	K21472
k127_1033561	k127_1033561_36	NA
k127_1033561	k127_1033561_37	K06183
k127_1033561	k127_1033561_38	NA
k127_1033561	k127_1033561_39	NA
k127_1033561	k127_1033561_4	NA
k127_1033561	k127_1033561_40	K07124
k127_1033561	k127_1033561_41	NA
k127_1033561	k127_1033561_42	K06179
k127_1033561	k127_1033561_43	K03700
k127_1033561	k127_1033561_44	NA
k127_1033561	k127_1033561_5	NA
k127_1033561	k127_1033561_6	NA
k127_1033561	k127_1033561_7	NA
k127_1033561	k127_1033561_8	NA
k127_1033561	k127_1033561_9	NA
k127_1033587	k127_1033587_1	NA
k127_1033587	k127_1033587_2	NA
k127_1033801	k127_1033801_1	NA
k127_1033801	k127_1033801_2	NA
k127_1033801	k127_1033801_3	NA
k127_1033923	k127_1033923_1	NA
k127_1034218	k127_1034218_1	NA
k127_1034218	k127_1034218_2	NA
k127_1034477	k127_1034477_1	NA
k127_1034477	k127_1034477_2	K00162
k127_1034815	NA	NA
k127_1034931	k127_1034931_1	K00766
k127_1035040	k127_1035040_1	NA
k127_1035040	k127_1035040_2	K07486
k127_1035041	k127_1035041_1	NA
k127_1035041	k127_1035041_2	NA
k127_1035253	k127_1035253_1	NA
k127_1035274	k127_1035274_1	NA
k127_1035274	k127_1035274_10	K07456
k127_1035274	k127_1035274_11	NA
k127_1035274	k127_1035274_12	NA
k127_1035274	k127_1035274_13	NA
k127_1035274	k127_1035274_14	K06333
k127_1035274	k127_1035274_15	K06334
k127_1035274	k127_1035274_16	K00027
k127_1035274	k127_1035274_17	K03695
k127_1035274	k127_1035274_18	NA
k127_1035274	k127_1035274_19	K00684
k127_1035274	k127_1035274_2	NA
k127_1035274	k127_1035274_20	K22293
k127_1035274	k127_1035274_3	NA
k127_1035274	k127_1035274_4	NA
k127_1035274	k127_1035274_5	NA
k127_1035274	k127_1035274_6	K03215
k127_1035274	k127_1035274_7	NA
k127_1035274	k127_1035274_8	K03698
k127_1035274	k127_1035274_9	K04771
k127_1036081	k127_1036081_1	NA
k127_1036081	k127_1036081_2	NA
k127_1036401	k127_1036401_1	K02313
k127_1036401	k127_1036401_2	K02338
k127_1036488	k127_1036488_1	NA
k127_1036488	k127_1036488_2	NA
k127_1036488	k127_1036488_3	NA
k127_1036488	k127_1036488_4	NA
k127_1036488	k127_1036488_5	NA
k127_1036544	k127_1036544_1	NA
k127_1036776	k127_1036776_1	NA
k127_1036776	k127_1036776_2	NA
k127_1036881	k127_1036881_1	NA
k127_1036985	k127_1036985_1	K03546
k127_1036985	k127_1036985_2	K03699
k127_1036985	k127_1036985_3	NA
k127_1036985	k127_1036985_4	K01258
k127_1036985	k127_1036985_5	NA
k127_10371	k127_10371_1	NA
k127_10371	k127_10371_2	K03703
k127_10371	k127_10371_3	K06023
k127_10371	k127_10371_4	K00075
k127_10371	k127_10371_5	K06958
k127_10371	k127_10371_6	K09762
k127_10371	k127_10371_7	K11184
k127_1037238	k127_1037238_1	NA
k127_1037238	k127_1037238_2	NA
k127_1037238	k127_1037238_3	NA
k127_1037238	k127_1037238_4	K03152
k127_1037238	k127_1037238_5	K01768
k127_1037300	k127_1037300_1	NA
k127_1037300	k127_1037300_2	NA
k127_1037300	k127_1037300_3	NA
k127_1037531	k127_1037531_1	NA
k127_1037531	k127_1037531_2	NA
k127_1037583	k127_1037583_1	NA
k127_1037583	k127_1037583_2	NA
k127_1037583	k127_1037583_3	NA
k127_1037617	k127_1037617_1	NA
k127_1037810	k127_1037810_1	K18888
k127_103790	k127_103790_1	NA
k127_103790	k127_103790_2	NA
k127_103807	k127_103807_1	K03545
k127_1038141	k127_1038141_1	NA
k127_1038141	k127_1038141_2	NA
k127_1038141	k127_1038141_3	NA
k127_1038172	k127_1038172_1	NA
k127_1038172	k127_1038172_2	NA
k127_1038362	k127_1038362_1	K02387
k127_1038362	k127_1038362_10	NA
k127_1038362	k127_1038362_11	K02390
k127_1038362	k127_1038362_12	NA
k127_1038362	k127_1038362_13	K02556
k127_1038362	k127_1038362_14	K02557
k127_1038362	k127_1038362_15	K02416
k127_1038362	k127_1038362_16	K03413
k127_1038362	k127_1038362_17	K02388
k127_1038362	k127_1038362_18	K02417
k127_1038362	k127_1038362_19	NA
k127_1038362	k127_1038362_2	NA
k127_1038362	k127_1038362_20	K02419
k127_1038362	k127_1038362_21	K02420
k127_1038362	k127_1038362_22	K02421
k127_1038362	k127_1038362_23	K02401
k127_1038362	k127_1038362_24	K02400
k127_1038362	k127_1038362_25	K02405
k127_1038362	k127_1038362_26	K02391
k127_1038362	k127_1038362_27	K02392
k127_1038362	k127_1038362_28	K03410
k127_1038362	k127_1038362_29	K03411
k127_1038362	k127_1038362_3	K02409
k127_1038362	k127_1038362_30	K03415
k127_1038362	k127_1038362_31	NA
k127_1038362	k127_1038362_32	NA
k127_1038362	k127_1038362_33	K03282
k127_1038362	k127_1038362_34	NA
k127_1038362	k127_1038362_35	NA
k127_1038362	k127_1038362_36	K03308
k127_1038362	k127_1038362_37	K22132
k127_1038362	k127_1038362_38	NA
k127_1038362	k127_1038362_4	K02410
k127_1038362	k127_1038362_5	K02411
k127_1038362	k127_1038362_6	K02412
k127_1038362	k127_1038362_7	K02413
k127_1038362	k127_1038362_8	NA
k127_1038362	k127_1038362_9	K02389
k127_1038411	k127_1038411_1	NA
k127_1038411	k127_1038411_10	NA
k127_1038411	k127_1038411_11	NA
k127_1038411	k127_1038411_12	K07486
k127_1038411	k127_1038411_13	NA
k127_1038411	k127_1038411_14	NA
k127_1038411	k127_1038411_15	NA
k127_1038411	k127_1038411_2	NA
k127_1038411	k127_1038411_3	NA
k127_1038411	k127_1038411_4	NA
k127_1038411	k127_1038411_5	NA
k127_1038411	k127_1038411_6	NA
k127_1038411	k127_1038411_7	NA
k127_1038411	k127_1038411_8	K06200
k127_1038411	k127_1038411_9	K03147
k127_1038418	k127_1038418_1	K07507
k127_1038418	k127_1038418_2	NA
k127_1038418	k127_1038418_3	K02011
k127_1038724	k127_1038724_1	NA
k127_1038724	k127_1038724_2	NA
k127_1038724	k127_1038724_3	NA
k127_1038724	k127_1038724_4	NA
k127_1038724	k127_1038724_5	NA
k127_1038734	k127_1038734_1	NA
k127_103902	k127_103902_1	NA
k127_103902	k127_103902_2	NA
k127_103902	k127_103902_3	K03704
k127_103902	k127_103902_4	K01465
k127_103902	k127_103902_5	K01591
k127_103902	k127_103902_6	K02823
k127_103902	k127_103902_7	K17828
k127_103902	k127_103902_8	NA
k127_1040090	k127_1040090_1	NA
k127_1041006	k127_1041006_1	K22130
k127_1041006	k127_1041006_2	K21948
k127_1041006	k127_1041006_3	NA
k127_1041006	k127_1041006_4	K02526
k127_1041006	k127_1041006_5	NA
k127_1041006	k127_1041006_6	NA
k127_10412	k127_10412_1	K15987
k127_10412	k127_10412_2	NA
k127_104159	k127_104159_1	NA
k127_1041747	k127_1041747_1	NA
k127_1041747	k127_1041747_2	NA
k127_1041747	k127_1041747_3	K11105
k127_1041747	k127_1041747_4	NA
k127_1042021	k127_1042021_1	NA
k127_1042248	k127_1042248_1	K21028
k127_1042371	NA	NA
k127_1042476	k127_1042476_1	K11527
k127_1042561	k127_1042561_1	NA
k127_1042561	k127_1042561_10	K03300
k127_1042561	k127_1042561_11	NA
k127_1042561	k127_1042561_12	NA
k127_1042561	k127_1042561_13	NA
k127_1042561	k127_1042561_14	NA
k127_1042561	k127_1042561_15	K25811
k127_1042561	k127_1042561_16	K07133
k127_1042561	k127_1042561_17	NA
k127_1042561	k127_1042561_18	NA
k127_1042561	k127_1042561_19	K07133
k127_1042561	k127_1042561_2	K13889
k127_1042561	k127_1042561_20	NA
k127_1042561	k127_1042561_21	NA
k127_1042561	k127_1042561_22	NA
k127_1042561	k127_1042561_23	NA
k127_1042561	k127_1042561_24	K01142
k127_1042561	k127_1042561_25	NA
k127_1042561	k127_1042561_26	NA
k127_1042561	k127_1042561_3	K13890
k127_1042561	k127_1042561_4	K13891
k127_1042561	k127_1042561_5	K02031
k127_1042561	k127_1042561_6	K02032
k127_1042561	k127_1042561_7	K16203
k127_1042561	k127_1042561_8	NA
k127_1042561	k127_1042561_9	K07010
k127_1043219	k127_1043219_1	NA
k127_1043228	k127_1043228_1	NA
k127_1043236	k127_1043236_1	K01262
k127_1043351	k127_1043351_1	K19081
k127_1043351	k127_1043351_10	K00057
k127_1043351	k127_1043351_11	K08591
k127_1043351	k127_1043351_12	K03977
k127_1043351	k127_1043351_13	NA
k127_1043351	k127_1043351_14	K00948
k127_1043351	k127_1043351_15	K22278
k127_1043351	k127_1043351_16	K00058
k127_1043351	k127_1043351_17	K00831
k127_1043351	k127_1043351_18	K01652
k127_1043351	k127_1043351_19	K01687
k127_1043351	k127_1043351_2	K19082
k127_1043351	k127_1043351_20	K00052
k127_1043351	k127_1043351_21	NA
k127_1043351	k127_1043351_22	K01005
k127_1043351	k127_1043351_23	K08600
k127_1043351	k127_1043351_24	NA
k127_1043351	k127_1043351_25	NA
k127_1043351	k127_1043351_26	K21472
k127_1043351	k127_1043351_27	K00688
k127_1043351	k127_1043351_28	K03210
k127_1043351	k127_1043351_29	K00773
k127_1043351	k127_1043351_3	NA
k127_1043351	k127_1043351_30	NA
k127_1043351	k127_1043351_31	K01736
k127_1043351	k127_1043351_32	NA
k127_1043351	k127_1043351_33	NA
k127_1043351	k127_1043351_34	NA
k127_1043351	k127_1043351_35	NA
k127_1043351	k127_1043351_36	K01867
k127_1043351	k127_1043351_37	NA
k127_1043351	k127_1043351_38	NA
k127_1043351	k127_1043351_39	NA
k127_1043351	k127_1043351_4	NA
k127_1043351	k127_1043351_40	K07173
k127_1043351	k127_1043351_41	NA
k127_1043351	k127_1043351_42	K06001
k127_1043351	k127_1043351_43	K02887
k127_1043351	k127_1043351_44	K02916
k127_1043351	k127_1043351_45	K02520
k127_1043351	k127_1043351_46	NA
k127_1043351	k127_1043351_47	K07704
k127_1043351	k127_1043351_5	NA
k127_1043351	k127_1043351_6	NA
k127_1043351	k127_1043351_7	K07098
k127_1043351	k127_1043351_8	NA
k127_1043351	k127_1043351_9	NA
k127_1043471	k127_1043471_1	NA
k127_1043471	k127_1043471_2	NA
k127_1044162	k127_1044162_1	NA
k127_1044162	k127_1044162_2	K07497
k127_1044218	k127_1044218_1	NA
k127_1044218	k127_1044218_2	NA
k127_1044218	k127_1044218_3	NA
k127_1044218	k127_1044218_4	NA
k127_1044218	k127_1044218_5	K07729
k127_1044218	k127_1044218_6	NA
k127_1044218	k127_1044218_7	NA
k127_1044218	k127_1044218_8	NA
k127_1044218	k127_1044218_9	NA
k127_1044993	k127_1044993_1	NA
k127_1045067	k127_1045067_1	NA
k127_1045067	k127_1045067_2	NA
k127_1045228	k127_1045228_1	K02346
k127_1045316	NA	NA
k127_1045369	k127_1045369_1	NA
k127_1045369	k127_1045369_2	NA
k127_1045696	k127_1045696_1	K12822
k127_1045871	k127_1045871_1	NA
k127_104594	k127_104594_1	K03292
k127_1045968	k127_1045968_1	K03429
k127_1046131	k127_1046131_1	NA
k127_1046422	k127_1046422_1	NA
k127_1046422	k127_1046422_2	NA
k127_1046440	k127_1046440_1	NA
k127_1046440	k127_1046440_2	NA
k127_1046482	k127_1046482_1	K06147
k127_1046624	k127_1046624_1	K01226
k127_1046624	k127_1046624_2	K03484
k127_1046624	k127_1046624_3	K01193
k127_1046624	k127_1046624_4	K02810
k127_1046624	k127_1046624_5	K01193
k127_1046624	k127_1046624_6	NA
k127_1046624	k127_1046624_7	NA
k127_1046624	k127_1046624_8	NA
k127_1046691	k127_1046691_1	NA
k127_1046691	k127_1046691_2	NA
k127_1046691	k127_1046691_3	NA
k127_1046870	NA	NA
k127_1046871	k127_1046871_1	NA
k127_1046871	k127_1046871_2	NA
k127_1046977	k127_1046977_1	NA
k127_1046977	k127_1046977_2	K01686
k127_1046977	k127_1046977_3	NA
k127_1047282	k127_1047282_1	NA
k127_1047282	k127_1047282_10	K01358
k127_1047282	k127_1047282_11	K03545
k127_1047282	k127_1047282_2	K06173
k127_1047282	k127_1047282_3	K16785
k127_1047282	k127_1047282_4	K16787
k127_1047282	k127_1047282_5	K16786
k127_1047282	k127_1047282_6	K03978
k127_1047282	k127_1047282_7	K01338
k127_1047282	k127_1047282_8	K03544
k127_1047282	k127_1047282_9	NA
k127_1047654	k127_1047654_1	K00688
k127_1047654	k127_1047654_2	K03699
k127_104775	k127_104775_1	NA
k127_1047876	k127_1047876_1	NA
k127_1048115	k127_1048115_1	NA
k127_1048179	k127_1048179_1	K11072
k127_1048201	k127_1048201_1	K10563
k127_1048201	k127_1048201_2	NA
k127_1048460	k127_1048460_1	K02563
k127_1048460	k127_1048460_2	NA
k127_104922	k127_104922_1	K01190
k127_104922	k127_104922_10	NA
k127_104922	k127_104922_11	K12410
k127_104922	k127_104922_12	K00384
k127_104922	k127_104922_13	K03671
k127_104922	k127_104922_14	K01420
k127_104922	k127_104922_15	NA
k127_104922	k127_104922_16	K03292
k127_104922	k127_104922_17	K03929
k127_104922	k127_104922_18	NA
k127_104922	k127_104922_19	NA
k127_104922	k127_104922_2	K02114
k127_104922	k127_104922_20	K25307
k127_104922	k127_104922_21	NA
k127_104922	k127_104922_22	NA
k127_104922	k127_104922_23	NA
k127_104922	k127_104922_24	K07467
k127_104922	k127_104922_3	K02112
k127_104922	k127_104922_4	K02115
k127_104922	k127_104922_5	K02111
k127_104922	k127_104922_6	K02113
k127_104922	k127_104922_7	K02109
k127_104922	k127_104922_8	K02110
k127_104922	k127_104922_9	K02108
k127_1049324	k127_1049324_1	K06409
k127_1049324	k127_1049324_2	K02499
k127_1049532	k127_1049532_1	NA
k127_1049532	k127_1049532_2	NA
k127_1050239	k127_1050239_1	NA
k127_105065	k127_105065_1	NA
k127_1050710	k127_1050710_1	NA
k127_1050710	k127_1050710_2	NA
k127_1050710	k127_1050710_3	NA
k127_105078	k127_105078_1	K12567
k127_105078	k127_105078_2	NA
k127_105078	k127_105078_3	NA
k127_105078	k127_105078_4	K03496
k127_105078	k127_105078_5	K03497
k127_105078	k127_105078_6	NA
k127_105078	k127_105078_7	NA
k127_1051075	k127_1051075_1	K03700
k127_1051075	k127_1051075_2	K02502
k127_1051465	k127_1051465_1	NA
k127_1051465	k127_1051465_2	NA
k127_1051465	k127_1051465_3	NA
k127_1051465	k127_1051465_4	NA
k127_1051667	k127_1051667_1	K25308
k127_1051667	k127_1051667_2	K25288
k127_1051667	k127_1051667_3	K25289
k127_1051667	k127_1051667_4	K25290
k127_1051822	k127_1051822_1	NA
k127_105209	k127_105209_1	K07089
k127_105209	k127_105209_2	NA
k127_105209	k127_105209_3	NA
k127_105209	k127_105209_4	NA
k127_105209	k127_105209_5	NA
k127_105209	k127_105209_6	NA
k127_105209	k127_105209_7	NA
k127_1052200	NA	NA
k127_1052253	k127_1052253_1	NA
k127_1052253	k127_1052253_2	NA
k127_1052253	k127_1052253_3	K06213
k127_105257	k127_105257_1	NA
k127_1052581	k127_1052581_1	NA
k127_1052581	k127_1052581_2	NA
k127_1052842	k127_1052842_1	NA
k127_1052842	k127_1052842_10	NA
k127_1052842	k127_1052842_11	NA
k127_1052842	k127_1052842_12	NA
k127_1052842	k127_1052842_2	NA
k127_1052842	k127_1052842_3	NA
k127_1052842	k127_1052842_4	NA
k127_1052842	k127_1052842_5	K07455
k127_1052842	k127_1052842_6	NA
k127_1052842	k127_1052842_7	NA
k127_1052842	k127_1052842_8	NA
k127_1052842	k127_1052842_9	NA
k127_1052857	k127_1052857_1	K01588
k127_1052857	k127_1052857_2	K01923
k127_1052905	k127_1052905_1	K03709
k127_105318	k127_105318_1	NA
k127_105318	k127_105318_2	NA
k127_105318	k127_105318_3	NA
k127_1053336	k127_1053336_1	K03466
k127_1053390	k127_1053390_1	K04069
k127_1053390	k127_1053390_2	K04069
k127_1053390	k127_1053390_3	K17076
k127_1053441	k127_1053441_1	K03527
k127_1053441	k127_1053441_2	NA
k127_1053736	k127_1053736_1	NA
k127_1053736	k127_1053736_10	K05799
k127_1053736	k127_1053736_11	NA
k127_1053736	k127_1053736_12	NA
k127_1053736	k127_1053736_13	NA
k127_1053736	k127_1053736_14	NA
k127_1053736	k127_1053736_15	K09955
k127_1053736	k127_1053736_16	NA
k127_1053736	k127_1053736_17	NA
k127_1053736	k127_1053736_18	K21471
k127_1053736	k127_1053736_19	NA
k127_1053736	k127_1053736_2	K00459
k127_1053736	k127_1053736_20	K03340
k127_1053736	k127_1053736_21	K03686
k127_1053736	k127_1053736_22	NA
k127_1053736	k127_1053736_23	NA
k127_1053736	k127_1053736_24	NA
k127_1053736	k127_1053736_25	K06969
k127_1053736	k127_1053736_26	NA
k127_1053736	k127_1053736_27	NA
k127_1053736	k127_1053736_28	NA
k127_1053736	k127_1053736_29	NA
k127_1053736	k127_1053736_3	NA
k127_1053736	k127_1053736_30	K19294
k127_1053736	k127_1053736_31	NA
k127_1053736	k127_1053736_32	NA
k127_1053736	k127_1053736_33	NA
k127_1053736	k127_1053736_34	NA
k127_1053736	k127_1053736_35	K03147
k127_1053736	k127_1053736_36	K06196
k127_1053736	k127_1053736_37	NA
k127_1053736	k127_1053736_38	NA
k127_1053736	k127_1053736_39	K01465
k127_1053736	k127_1053736_4	K02031
k127_1053736	k127_1053736_40	NA
k127_1053736	k127_1053736_41	NA
k127_1053736	k127_1053736_42	K26172
k127_1053736	k127_1053736_43	NA
k127_1053736	k127_1053736_44	NA
k127_1053736	k127_1053736_5	K02035
k127_1053736	k127_1053736_6	K02034
k127_1053736	k127_1053736_7	K02033
k127_1053736	k127_1053736_8	NA
k127_1053736	k127_1053736_9	K18013
k127_1054117	k127_1054117_1	K07406
k127_105434	k127_105434_1	NA
k127_1054486	k127_1054486_1	K03699
k127_1054486	k127_1054486_2	K03699
k127_1054610	k127_1054610_1	NA
k127_105475	k127_105475_1	NA
k127_105475	k127_105475_2	K14699
k127_1054777	k127_1054777_1	K03217
k127_1054777	k127_1054777_2	K06346
k127_1054777	k127_1054777_3	K03650
k127_1054827	k127_1054827_1	K18123
k127_1055065	k127_1055065_1	K19055
k127_1055065	k127_1055065_2	K00931
k127_1055065	k127_1055065_3	NA
k127_1055065	k127_1055065_4	NA
k127_1055065	k127_1055065_5	K06334
k127_1055065	k127_1055065_6	K06333
k127_1055065	k127_1055065_7	K00854
k127_10555	k127_10555_1	NA
k127_1056035	k127_1056035_1	NA
k127_1056035	k127_1056035_2	NA
k127_1056035	k127_1056035_3	NA
k127_1056035	k127_1056035_4	NA
k127_1056576	k127_1056576_1	NA
k127_1056576	k127_1056576_2	K25307
k127_1056576	k127_1056576_3	NA
k127_1056576	k127_1056576_4	K01448
k127_1056576	k127_1056576_5	NA
k127_1056576	k127_1056576_6	K03699
k127_1056576	k127_1056576_7	NA
k127_1056659	k127_1056659_1	NA
k127_1056659	k127_1056659_2	NA
k127_1056696	k127_1056696_1	NA
k127_1056696	k127_1056696_2	K00986
k127_1057128	k127_1057128_1	NA
k127_1057620	k127_1057620_1	NA
k127_1057620	k127_1057620_2	NA
k127_1057791	k127_1057791_1	K01880
k127_1057791	k127_1057791_2	K00973
k127_1057973	k127_1057973_1	NA
k127_1058277	k127_1058277_1	NA
k127_1058277	k127_1058277_2	K00612
k127_1058277	k127_1058277_3	K00612
k127_1058277	k127_1058277_4	NA
k127_105867	k127_105867_1	NA
k127_105867	k127_105867_10	NA
k127_105867	k127_105867_11	NA
k127_105867	k127_105867_12	NA
k127_105867	k127_105867_13	NA
k127_105867	k127_105867_14	NA
k127_105867	k127_105867_15	K15581
k127_105867	k127_105867_16	K15582
k127_105867	k127_105867_17	K15583
k127_105867	k127_105867_18	K10823
k127_105867	k127_105867_19	K15580
k127_105867	k127_105867_2	NA
k127_105867	k127_105867_20	K01297
k127_105867	k127_105867_21	K01775
k127_105867	k127_105867_22	NA
k127_105867	k127_105867_23	NA
k127_105867	k127_105867_3	NA
k127_105867	k127_105867_4	NA
k127_105867	k127_105867_5	NA
k127_105867	k127_105867_6	NA
k127_105867	k127_105867_7	NA
k127_105867	k127_105867_8	NA
k127_105867	k127_105867_9	NA
k127_105873	k127_105873_1	K14059
k127_105873	k127_105873_10	NA
k127_105873	k127_105873_11	NA
k127_105873	k127_105873_12	NA
k127_105873	k127_105873_13	NA
k127_105873	k127_105873_14	NA
k127_105873	k127_105873_15	NA
k127_105873	k127_105873_2	NA
k127_105873	k127_105873_3	NA
k127_105873	k127_105873_4	NA
k127_105873	k127_105873_5	NA
k127_105873	k127_105873_6	K03696
k127_105873	k127_105873_7	K19411
k127_105873	k127_105873_8	NA
k127_105873	k127_105873_9	K13993
k127_1059229	k127_1059229_1	K02800
k127_1059229	k127_1059229_2	K07483
k127_1059229	k127_1059229_3	K07497
k127_1059334	k127_1059334_1	NA
k127_1059345	k127_1059345_1	NA
k127_1059651	k127_1059651_1	NA
k127_1059777	k127_1059777_1	K03624
k127_1059777	k127_1059777_2	K04567
k127_1059855	k127_1059855_1	NA
k127_1059855	k127_1059855_2	NA
k127_1059855	k127_1059855_3	NA
k127_1060057	k127_1060057_1	K03169
k127_1060234	k127_1060234_1	NA
k127_1060234	k127_1060234_2	NA
k127_1060234	k127_1060234_3	NA
k127_1060234	k127_1060234_4	NA
k127_1060234	k127_1060234_5	NA
k127_1060234	k127_1060234_6	NA
k127_1060234	k127_1060234_7	NA
k127_1060234	k127_1060234_8	NA
k127_1060234	k127_1060234_9	K21071
k127_1060690	k127_1060690_1	NA
k127_1060690	k127_1060690_2	NA
k127_1060728	k127_1060728_1	K03581
k127_1060728	k127_1060728_2	K03581
k127_1060853	k127_1060853_1	NA
k127_1060853	k127_1060853_2	K21407
k127_1060853	k127_1060853_3	NA
k127_1060853	k127_1060853_4	NA
k127_1060863	k127_1060863_1	K03763
k127_1060863	k127_1060863_2	K03526
k127_1060863	k127_1060863_3	NA
k127_1060863	k127_1060863_4	NA
k127_1060863	k127_1060863_5	K07009
k127_1060863	k127_1060863_6	K23393
k127_1060944	k127_1060944_1	NA
k127_1060944	k127_1060944_2	NA
k127_1060944	k127_1060944_3	K07347
k127_1061041	k127_1061041_1	NA
k127_1061587	k127_1061587_1	NA
k127_1061587	k127_1061587_2	NA
k127_1061587	k127_1061587_3	NA
k127_1061587	k127_1061587_4	K03498
k127_1061587	k127_1061587_5	NA
k127_1061587	k127_1061587_6	K13038
k127_1061587	k127_1061587_7	K02003
k127_1061587	k127_1061587_8	NA
k127_106162	k127_106162_1	K07493
k127_1061663	k127_1061663_1	K03654
k127_106198	k127_106198_1	K07052
k127_106198	k127_106198_10	NA
k127_106198	k127_106198_11	K07729
k127_106198	k127_106198_12	K01990
k127_106198	k127_106198_13	NA
k127_106198	k127_106198_14	K07098
k127_106198	k127_106198_15	NA
k127_106198	k127_106198_16	NA
k127_106198	k127_106198_17	NA
k127_106198	k127_106198_2	NA
k127_106198	k127_106198_3	NA
k127_106198	k127_106198_4	NA
k127_106198	k127_106198_5	NA
k127_106198	k127_106198_6	NA
k127_106198	k127_106198_7	NA
k127_106198	k127_106198_8	NA
k127_106198	k127_106198_9	NA
k127_1062514	k127_1062514_1	NA
k127_1062514	k127_1062514_2	K02012
k127_1062514	k127_1062514_3	NA
k127_1062597	k127_1062597_1	NA
k127_1062597	k127_1062597_2	NA
k127_1062597	k127_1062597_3	NA
k127_1062607	k127_1062607_1	NA
k127_1063188	k127_1063188_1	K02879
k127_1063188	k127_1063188_2	K03040
k127_1063188	k127_1063188_3	K02986
k127_1063188	k127_1063188_4	K02948
k127_1063188	k127_1063188_5	K02952
k127_1063338	k127_1063338_1	K02026
k127_1063338	k127_1063338_2	K02025
k127_1063499	k127_1063499_1	NA
k127_106360	k127_106360_1	NA
k127_106360	k127_106360_2	NA
k127_106360	k127_106360_3	NA
k127_1064131	k127_1064131_1	K01886
k127_1064131	k127_1064131_2	K06252
k127_106421	k127_106421_1	K02007
k127_1064665	k127_1064665_1	NA
k127_1064667	k127_1064667_1	NA
k127_1064900	k127_1064900_1	K02190
k127_1064900	k127_1064900_2	K02188
k127_106538	NA	NA
k127_1065387	k127_1065387_1	NA
k127_1065387	k127_1065387_2	NA
k127_1065387	k127_1065387_3	NA
k127_106576	k127_106576_1	NA
k127_1065976	k127_1065976_1	NA
k127_1066789	k127_1066789_1	NA
k127_1066789	k127_1066789_2	NA
k127_1066931	k127_1066931_1	NA
k127_1066931	k127_1066931_2	NA
k127_1066931	k127_1066931_3	NA
k127_1067038	k127_1067038_1	NA
k127_1067183	k127_1067183_1	NA
k127_1067221	k127_1067221_1	K03499
k127_1067221	k127_1067221_2	K08301
k127_1067221	k127_1067221_3	NA
k127_1067221	k127_1067221_4	NA
k127_1067257	k127_1067257_1	NA
k127_1067317	k127_1067317_1	NA
k127_1067317	k127_1067317_2	NA
k127_1067317	k127_1067317_3	NA
k127_1067317	k127_1067317_4	NA
k127_1067574	k127_1067574_1	NA
k127_1067876	k127_1067876_1	K16881
k127_1067876	k127_1067876_2	K12574
k127_1068426	k127_1068426_1	NA
k127_1068426	k127_1068426_2	K18369
k127_1068426	k127_1068426_3	NA
k127_1068426	k127_1068426_4	K00688
k127_1068426	k127_1068426_5	NA
k127_1068426	k127_1068426_6	NA
k127_106865	k127_106865_1	NA
k127_106865	k127_106865_2	NA
k127_106866	k127_106866_1	K00077
k127_106866	k127_106866_2	K07035
k127_1068681	k127_1068681_1	NA
k127_1068681	k127_1068681_2	NA
k127_1068790	k127_1068790_1	NA
k127_10688	k127_10688_1	K10439
k127_10688	k127_10688_10	K11991
k127_10688	k127_10688_11	NA
k127_10688	k127_10688_12	K07149
k127_10688	k127_10688_13	NA
k127_10688	k127_10688_14	K07040
k127_10688	k127_10688_15	K02911
k127_10688	k127_10688_16	NA
k127_10688	k127_10688_17	NA
k127_10688	k127_10688_18	NA
k127_10688	k127_10688_19	NA
k127_10688	k127_10688_2	K10440
k127_10688	k127_10688_20	NA
k127_10688	k127_10688_21	NA
k127_10688	k127_10688_3	K10441
k127_10688	k127_10688_4	NA
k127_10688	k127_10688_5	K10441
k127_10688	k127_10688_6	K07718
k127_10688	k127_10688_7	K07720
k127_10688	k127_10688_8	K02528
k127_10688	k127_10688_9	NA
k127_1068937	k127_1068937_1	NA
k127_1068978	k127_1068978_1	NA
k127_1068978	k127_1068978_2	NA
k127_1068978	k127_1068978_3	NA
k127_1068978	k127_1068978_4	NA
k127_1069030	k127_1069030_1	NA
k127_1069030	k127_1069030_2	NA
k127_1069333	k127_1069333_1	NA
k127_1069413	k127_1069413_1	K25010
k127_1069517	k127_1069517_1	NA
k127_1070068	k127_1070068_1	K05366
k127_107009	k127_107009_1	NA
k127_107009	k127_107009_2	NA
k127_1070238	k127_1070238_1	K00931
k127_1070470	k127_1070470_1	K00764
k127_1070470	k127_1070470_2	K01937
k127_1070470	k127_1070470_3	K01953
k127_107061	k127_107061_1	NA
k127_1070648	k127_1070648_1	K00655
k127_1070648	k127_1070648_2	NA
k127_1070648	k127_1070648_3	K05847
k127_1070648	k127_1070648_4	K05845
k127_1070648	k127_1070648_4	K05846
k127_1070648	k127_1070648_5	K05845
k127_1070648	k127_1070648_5	K05846
k127_1070648	k127_1070648_6	NA
k127_1070648	k127_1070648_7	K14083
k127_1070648	k127_1070648_8	NA
k127_1070785	k127_1070785_1	NA
k127_1070785	k127_1070785_2	K01808
k127_1070785	k127_1070785_3	K02529
k127_107092	k127_107092_1	NA
k127_107092	k127_107092_2	NA
k127_107092	k127_107092_3	NA
k127_1070942	k127_1070942_1	K03830
k127_1070999	k127_1070999_1	NA
k127_1070999	k127_1070999_2	NA
k127_1070999	k127_1070999_3	K10441
k127_1071060	k127_1071060_1	K01142
k127_1071060	k127_1071060_2	NA
k127_1071324	k127_1071324_1	NA
k127_1071602	k127_1071602_1	NA
k127_1071602	k127_1071602_2	NA
k127_1071602	k127_1071602_3	NA
k127_1071639	k127_1071639_1	NA
k127_1071639	k127_1071639_2	K00382
k127_1071639	k127_1071639_3	NA
k127_1071702	k127_1071702_1	NA
k127_1071702	k127_1071702_2	NA
[truncated: 254,339+ more rows]

## Sheet: KEGG_definition
KO_ID	KO_gene_definition	Brite	Brite_definition	Module	Module_definition	Pathway	Pathway_definition
K00001	E1.1.1.1, adh; alcohol dehydrogenase [EC:1.1.1.1]	ko00001	KEGG Orthology	NA	NA	10	Glycolysis _ Gluconeogenesis
K00001	E1.1.1.1, adh; alcohol dehydrogenase [EC:1.1.1.1]	ko00001	KEGG Orthology	NA	NA	71	Fatty acid degradation
K00001	E1.1.1.1, adh; alcohol dehydrogenase [EC:1.1.1.1]	ko00001	KEGG Orthology	NA	NA	350	Tyrosine metabolism
K00001	E1.1.1.1, adh; alcohol dehydrogenase [EC:1.1.1.1]	ko00001	KEGG Orthology	NA	NA	620	Pyruvate metabolism
K00001	E1.1.1.1, adh; alcohol dehydrogenase [EC:1.1.1.1]	ko00001	KEGG Orthology	NA	NA	625	Chloroalkane and chloroalkene degradation
K00001	E1.1.1.1, adh; alcohol dehydrogenase [EC:1.1.1.1]	ko00001	KEGG Orthology	NA	NA	626	Naphthalene degradation
K00001	E1.1.1.1, adh; alcohol dehydrogenase [EC:1.1.1.1]	ko00001	KEGG Orthology	NA	NA	830	Retinol metabolism
K00001	E1.1.1.1, adh; alcohol dehydrogenase [EC:1.1.1.1]	ko00001	KEGG Orthology	NA	NA	980	Metabolism of xenobiotics by cytochrome P450
K00001	E1.1.1.1, adh; alcohol dehydrogenase [EC:1.1.1.1]	ko00001	KEGG Orthology	NA	NA	982	Drug metabolism - cytochrome P450
K00001	E1.1.1.1, adh; alcohol dehydrogenase [EC:1.1.1.1]	ko00001	KEGG Orthology	NA	NA	1100	Metabolic pathways
K00001	E1.1.1.1, adh; alcohol dehydrogenase [EC:1.1.1.1]	ko00001	KEGG Orthology	NA	NA	1110	Biosynthesis of secondary metabolites
K00001	E1.1.1.1, adh; alcohol dehydrogenase [EC:1.1.1.1]	ko00001	KEGG Orthology	NA	NA	1120	Microbial metabolism in diverse environments
K00001	E1.1.1.1, adh; alcohol dehydrogenase [EC:1.1.1.1]	ko00001	KEGG Orthology	NA	NA	1220	Degradation of aromatic compounds
K00002	AKR1A1, adh; alcohol dehydrogenase [EC:1.1.1.2]	ko00001	KEGG Orthology	M00014	Glucuronate pathway	10	Glycolysis _ Gluconeogenesis
K00002	AKR1A1, adh; alcohol dehydrogenase [EC:1.1.1.2]	ko00001	KEGG Orthology	M00014	Glucuronate pathway	40	Pentose and glucuronate interconversions
K00002	AKR1A1, adh; alcohol dehydrogenase [EC:1.1.1.2]	ko00001	KEGG Orthology	M00014	Glucuronate pathway	53	Ascorbate and aldarate metabolism
K00002	AKR1A1, adh; alcohol dehydrogenase [EC:1.1.1.2]	ko00001	KEGG Orthology	M00014	Glucuronate pathway	561	Glycerolipid metabolism
K00002	AKR1A1, adh; alcohol dehydrogenase [EC:1.1.1.2]	ko00001	KEGG Orthology	M00014	Glucuronate pathway	620	Pyruvate metabolism
K00002	AKR1A1, adh; alcohol dehydrogenase [EC:1.1.1.2]	ko00001	KEGG Orthology	M00014	Glucuronate pathway	930	Caprolactam degradation
K00002	AKR1A1, adh; alcohol dehydrogenase [EC:1.1.1.2]	ko00001	KEGG Orthology	M00014	Glucuronate pathway	1100	Metabolic pathways
K00002	AKR1A1, adh; alcohol dehydrogenase [EC:1.1.1.2]	ko00001	KEGG Orthology	M00014	Glucuronate pathway	1110	Biosynthesis of secondary metabolites
K00002	AKR1A1, adh; alcohol dehydrogenase [EC:1.1.1.2]	ko00001	KEGG Orthology	M00014	Glucuronate pathway	1120	Microbial metabolism in diverse environments
K00002	AKR1A1, adh; alcohol dehydrogenase [EC:1.1.1.2]	ko00001	KEGG Orthology	M00014	Glucuronate pathway	1220	Degradation of aromatic compounds
K00002	AKR1A1, adh; alcohol dehydrogenase [EC:1.1.1.2]	ko00001	KEGG Orthology	M00014	Glucuronate pathway	1240	Biosynthesis of cofactors
K00002	AKR1A1, adh; alcohol dehydrogenase [EC:1.1.1.2]	ko00001	KEGG Orthology	M00014	Glucuronate pathway	5208	Chemical carcinogenesis - reactive oxygen species
K00002	AKR1A1, adh; alcohol dehydrogenase [EC:1.1.1.2]	ko00001	KEGG Orthology	M00129	Ascorbate biosynthesis; animals; glucose-1P => ascorbate	10	Glycolysis _ Gluconeogenesis
K00002	AKR1A1, adh; alcohol dehydrogenase [EC:1.1.1.2]	ko00001	KEGG Orthology	M00129	Ascorbate biosynthesis; animals; glucose-1P => ascorbate	40	Pentose and glucuronate interconversions
K00002	AKR1A1, adh; alcohol dehydrogenase [EC:1.1.1.2]	ko00001	KEGG Orthology	M00129	Ascorbate biosynthesis; animals; glucose-1P => ascorbate	53	Ascorbate and aldarate metabolism
K00002	AKR1A1, adh; alcohol dehydrogenase [EC:1.1.1.2]	ko00001	KEGG Orthology	M00129	Ascorbate biosynthesis; animals; glucose-1P => ascorbate	561	Glycerolipid metabolism
K00002	AKR1A1, adh; alcohol dehydrogenase [EC:1.1.1.2]	ko00001	KEGG Orthology	M00129	Ascorbate biosynthesis; animals; glucose-1P => ascorbate	620	Pyruvate metabolism
K00002	AKR1A1, adh; alcohol dehydrogenase [EC:1.1.1.2]	ko00001	KEGG Orthology	M00129	Ascorbate biosynthesis; animals; glucose-1P => ascorbate	930	Caprolactam degradation
K00002	AKR1A1, adh; alcohol dehydrogenase [EC:1.1.1.2]	ko00001	KEGG Orthology	M00129	Ascorbate biosynthesis; animals; glucose-1P => ascorbate	1100	Metabolic pathways
K00002	AKR1A1, adh; alcohol dehydrogenase [EC:1.1.1.2]	ko00001	KEGG Orthology	M00129	Ascorbate biosynthesis; animals; glucose-1P => ascorbate	1110	Biosynthesis of secondary metabolites
K00002	AKR1A1, adh; alcohol dehydrogenase [EC:1.1.1.2]	ko00001	KEGG Orthology	M00129	Ascorbate biosynthesis; animals; glucose-1P => ascorbate	1120	Microbial metabolism in diverse environments
K00002	AKR1A1, adh; alcohol dehydrogenase [EC:1.1.1.2]	ko00001	KEGG Orthology	M00129	Ascorbate biosynthesis; animals; glucose-1P => ascorbate	1220	Degradation of aromatic compounds
K00002	AKR1A1, adh; alcohol dehydrogenase [EC:1.1.1.2]	ko00001	KEGG Orthology	M00129	Ascorbate biosynthesis; animals; glucose-1P => ascorbate	1240	Biosynthesis of cofactors
K00002	AKR1A1, adh; alcohol dehydrogenase [EC:1.1.1.2]	ko00001	KEGG Orthology	M00129	Ascorbate biosynthesis; animals; glucose-1P => ascorbate	5208	Chemical carcinogenesis - reactive oxygen species
K00003	hom; homoserine dehydrogenase [EC:1.1.1.3]	ko00001	KEGG Orthology	M00017	Methionine biosynthesis; aspartate => homoserine => methionine	260	Glycine; serine and threonine metabolism
K00003	hom; homoserine dehydrogenase [EC:1.1.1.3]	ko00001	KEGG Orthology	M00017	Methionine biosynthesis; aspartate => homoserine => methionine	270	Cysteine and methionine metabolism
K00003	hom; homoserine dehydrogenase [EC:1.1.1.3]	ko00001	KEGG Orthology	M00017	Methionine biosynthesis; aspartate => homoserine => methionine	300	Lysine biosynthesis
K00003	hom; homoserine dehydrogenase [EC:1.1.1.3]	ko00001	KEGG Orthology	M00017	Methionine biosynthesis; aspartate => homoserine => methionine	1100	Metabolic pathways
K00003	hom; homoserine dehydrogenase [EC:1.1.1.3]	ko00001	KEGG Orthology	M00017	Methionine biosynthesis; aspartate => homoserine => methionine	1110	Biosynthesis of secondary metabolites
K00003	hom; homoserine dehydrogenase [EC:1.1.1.3]	ko00001	KEGG Orthology	M00017	Methionine biosynthesis; aspartate => homoserine => methionine	1120	Microbial metabolism in diverse environments
K00003	hom; homoserine dehydrogenase [EC:1.1.1.3]	ko00001	KEGG Orthology	M00017	Methionine biosynthesis; aspartate => homoserine => methionine	1230	Biosynthesis of amino acids
K00003	hom; homoserine dehydrogenase [EC:1.1.1.3]	ko00001	KEGG Orthology	M00018	Threonine biosynthesis; aspartate => homoserine => threonine	260	Glycine; serine and threonine metabolism
K00003	hom; homoserine dehydrogenase [EC:1.1.1.3]	ko00001	KEGG Orthology	M00018	Threonine biosynthesis; aspartate => homoserine => threonine	270	Cysteine and methionine metabolism
K00003	hom; homoserine dehydrogenase [EC:1.1.1.3]	ko00001	KEGG Orthology	M00018	Threonine biosynthesis; aspartate => homoserine => threonine	300	Lysine biosynthesis
K00003	hom; homoserine dehydrogenase [EC:1.1.1.3]	ko00001	KEGG Orthology	M00018	Threonine biosynthesis; aspartate => homoserine => threonine	1100	Metabolic pathways
K00003	hom; homoserine dehydrogenase [EC:1.1.1.3]	ko00001	KEGG Orthology	M00018	Threonine biosynthesis; aspartate => homoserine => threonine	1110	Biosynthesis of secondary metabolites
K00003	hom; homoserine dehydrogenase [EC:1.1.1.3]	ko00001	KEGG Orthology	M00018	Threonine biosynthesis; aspartate => homoserine => threonine	1120	Microbial metabolism in diverse environments
K00003	hom; homoserine dehydrogenase [EC:1.1.1.3]	ko00001	KEGG Orthology	M00018	Threonine biosynthesis; aspartate => homoserine => threonine	1230	Biosynthesis of amino acids
K00004	BDH, butB; -butanediol dehydrogenase / meso-butanediol dehydrogenase / diacetyl reductase [EC:1.1.1.4 1.1.1.- 1.1.1.303]	ko00001	KEGG Orthology	NA	NA	650	Butanoate metabolism
K00004	BDH, butB; -butanediol dehydrogenase / meso-butanediol dehydrogenase / diacetyl reductase [EC:1.1.1.4 1.1.1.- 1.1.1.303]	ko00001	KEGG Orthology	NA	NA	1110	Biosynthesis of secondary metabolites
K00005	gldA; glycerol dehydrogenase [EC:1.1.1.6]	ko00001	KEGG Orthology	NA	NA	561	Glycerolipid metabolism
K00005	gldA; glycerol dehydrogenase [EC:1.1.1.6]	ko00001	KEGG Orthology	NA	NA	640	Propanoate metabolism
K00005	gldA; glycerol dehydrogenase [EC:1.1.1.6]	ko00001	KEGG Orthology	NA	NA	1100	Metabolic pathways
K00007	dalD; D-arabinitol 4-dehydrogenase [EC:1.1.1.11]	ko00001	KEGG Orthology	NA	NA	40	Pentose and glucuronate interconversions
K00007	dalD; D-arabinitol 4-dehydrogenase [EC:1.1.1.11]	ko00001	KEGG Orthology	NA	NA	51	Fructose and mannose metabolism
K00007	dalD; D-arabinitol 4-dehydrogenase [EC:1.1.1.11]	ko00001	KEGG Orthology	NA	NA	1100	Metabolic pathways
K00008	SORD, gutB; L-iditol 2-dehydrogenase [EC:1.1.1.14]	ko00001	KEGG Orthology	M00014	Glucuronate pathway	40	Pentose and glucuronate interconversions
K00008	SORD, gutB; L-iditol 2-dehydrogenase [EC:1.1.1.14]	ko00001	KEGG Orthology	M00014	Glucuronate pathway	51	Fructose and mannose metabolism
K00008	SORD, gutB; L-iditol 2-dehydrogenase [EC:1.1.1.14]	ko00001	KEGG Orthology	M00014	Glucuronate pathway	1100	Metabolic pathways
K00009	mtlD; mannitol-1-phosphate 5-dehydrogenase [EC:1.1.1.17]	ko00001	KEGG Orthology	NA	NA	51	Fructose and mannose metabolism
K00009	mtlD; mannitol-1-phosphate 5-dehydrogenase [EC:1.1.1.17]	ko00001	KEGG Orthology	NA	NA	1100	Metabolic pathways
K00010	iolG; myo-inositol 2-dehydrogenase / D-chiro-inositol 1-dehydrogenase [EC:1.1.1.18 1.1.1.369]	ko00001	KEGG Orthology	NA	NA	521	Streptomycin biosynthesis
K00010	iolG; myo-inositol 2-dehydrogenase / D-chiro-inositol 1-dehydrogenase [EC:1.1.1.18 1.1.1.369]	ko00001	KEGG Orthology	NA	NA	562	Inositol phosphate metabolism
K00010	iolG; myo-inositol 2-dehydrogenase / D-chiro-inositol 1-dehydrogenase [EC:1.1.1.18 1.1.1.369]	ko00001	KEGG Orthology	NA	NA	1100	Metabolic pathways
K00010	iolG; myo-inositol 2-dehydrogenase / D-chiro-inositol 1-dehydrogenase [EC:1.1.1.18 1.1.1.369]	ko00001	KEGG Orthology	NA	NA	1110	Biosynthesis of secondary metabolites
K00010	iolG; myo-inositol 2-dehydrogenase / D-chiro-inositol 1-dehydrogenase [EC:1.1.1.18 1.1.1.369]	ko00001	KEGG Orthology	NA	NA	1120	Microbial metabolism in diverse environments
K00012	UGDH, ugd; UDPglucose 6-dehydrogenase [EC:1.1.1.22]	ko00001	KEGG Orthology	M00014	Glucuronate pathway	40	Pentose and glucuronate interconversions
K00012	UGDH, ugd; UDPglucose 6-dehydrogenase [EC:1.1.1.22]	ko00001	KEGG Orthology	M00014	Glucuronate pathway	53	Ascorbate and aldarate metabolism
K00012	UGDH, ugd; UDPglucose 6-dehydrogenase [EC:1.1.1.22]	ko00001	KEGG Orthology	M00014	Glucuronate pathway	520	Amino sugar and nucleotide sugar metabolism
K00012	UGDH, ugd; UDPglucose 6-dehydrogenase [EC:1.1.1.22]	ko00001	KEGG Orthology	M00014	Glucuronate pathway	541	O-Antigen nucleotide sugar biosynthesis
K00012	UGDH, ugd; UDPglucose 6-dehydrogenase [EC:1.1.1.22]	ko00001	KEGG Orthology	M00014	Glucuronate pathway	1100	Metabolic pathways
K00012	UGDH, ugd; UDPglucose 6-dehydrogenase [EC:1.1.1.22]	ko00001	KEGG Orthology	M00014	Glucuronate pathway	1240	Biosynthesis of cofactors
K00012	UGDH, ugd; UDPglucose 6-dehydrogenase [EC:1.1.1.22]	ko00001	KEGG Orthology	M00014	Glucuronate pathway	1250	Biosynthesis of nucleotide sugars
K00012	UGDH, ugd; UDPglucose 6-dehydrogenase [EC:1.1.1.22]	ko00001	KEGG Orthology	M00129	Ascorbate biosynthesis; animals; glucose-1P => ascorbate	40	Pentose and glucuronate interconversions
K00012	UGDH, ugd; UDPglucose 6-dehydrogenase [EC:1.1.1.22]	ko00001	KEGG Orthology	M00129	Ascorbate biosynthesis; animals; glucose-1P => ascorbate	53	Ascorbate and aldarate metabolism
K00012	UGDH, ugd; UDPglucose 6-dehydrogenase [EC:1.1.1.22]	ko00001	KEGG Orthology	M00129	Ascorbate biosynthesis; animals; glucose-1P => ascorbate	520	Amino sugar and nucleotide sugar metabolism
K00012	UGDH, ugd; UDPglucose 6-dehydrogenase [EC:1.1.1.22]	ko00001	KEGG Orthology	M00129	Ascorbate biosynthesis; animals; glucose-1P => ascorbate	541	O-Antigen nucleotide sugar biosynthesis
K00012	UGDH, ugd; UDPglucose 6-dehydrogenase [EC:1.1.1.22]	ko00001	KEGG Orthology	M00129	Ascorbate biosynthesis; animals; glucose-1P => ascorbate	1100	Metabolic pathways
K00012	UGDH, ugd; UDPglucose 6-dehydrogenase [EC:1.1.1.22]	ko00001	KEGG Orthology	M00129	Ascorbate biosynthesis; animals; glucose-1P => ascorbate	1240	Biosynthesis of cofactors
K00012	UGDH, ugd; UDPglucose 6-dehydrogenase [EC:1.1.1.22]	ko00001	KEGG Orthology	M00129	Ascorbate biosynthesis; animals; glucose-1P => ascorbate	1250	Biosynthesis of nucleotide sugars
K00013	hisD; histidinol dehydrogenase [EC:1.1.1.23]	ko00001	KEGG Orthology	M00026	Histidine biosynthesis; PRPP => histidine	340	Histidine metabolism
K00013	hisD; histidinol dehydrogenase [EC:1.1.1.23]	ko00001	KEGG Orthology	M00026	Histidine biosynthesis; PRPP => histidine	1100	Metabolic pathways
K00013	hisD; histidinol dehydrogenase [EC:1.1.1.23]	ko00001	KEGG Orthology	M00026	Histidine biosynthesis; PRPP => histidine	1110	Biosynthesis of secondary metabolites
K00013	hisD; histidinol dehydrogenase [EC:1.1.1.23]	ko00001	KEGG Orthology	M00026	Histidine biosynthesis; PRPP => histidine	1230	Biosynthesis of amino acids
K00014	aroE; shikimate dehydrogenase [EC:1.1.1.25]	ko00001	KEGG Orthology	M00022	Shikimate pathway; phosphoenolpyruvate + erythrose-4P => chorismate	400	Phenylalanine; tyrosine and tryptophan biosynthesis
K00014	aroE; shikimate dehydrogenase [EC:1.1.1.25]	ko00001	KEGG Orthology	M00022	Shikimate pathway; phosphoenolpyruvate + erythrose-4P => chorismate	999	Biosynthesis of various plant secondary metabolites; Including: Crocin biosynthesis; Ginsenoside biosynthesis; Saponin adjuvant biosynthesis; Cannabidiol biosynthesis; Mugineic acid biosynthesis; Pentagalloylglucose biosynthesis; Benzoxazinoid biosynthesis; Gramine biosynthesis; Coumarin biosynthesis; Furanocoumarin biosynthesis; Hordatine biosynthesis; Podophyllotoxin biosynthesis
K00014	aroE; shikimate dehydrogenase [EC:1.1.1.25]	ko00001	KEGG Orthology	M00022	Shikimate pathway; phosphoenolpyruvate + erythrose-4P => chorismate	1100	Metabolic pathways
K00014	aroE; shikimate dehydrogenase [EC:1.1.1.25]	ko00001	KEGG Orthology	M00022	Shikimate pathway; phosphoenolpyruvate + erythrose-4P => chorismate	1110	Biosynthesis of secondary metabolites
K00014	aroE; shikimate dehydrogenase [EC:1.1.1.25]	ko00001	KEGG Orthology	M00022	Shikimate pathway; phosphoenolpyruvate + erythrose-4P => chorismate	1230	Biosynthesis of amino acids
K00015	gyaR, GOR1; glyoxylate reductase [EC:1.1.1.26]	ko00001	KEGG Orthology	NA	NA	630	Glyoxylate and dicarboxylate metabolism
K00015	gyaR, GOR1; glyoxylate reductase [EC:1.1.1.26]	ko00001	KEGG Orthology	NA	NA	1100	Metabolic pathways
K00015	gyaR, GOR1; glyoxylate reductase [EC:1.1.1.26]	ko00001	KEGG Orthology	NA	NA	1110	Biosynthesis of secondary metabolites
K00015	gyaR, GOR1; glyoxylate reductase [EC:1.1.1.26]	ko00001	KEGG Orthology	NA	NA	1120	Microbial metabolism in diverse environments
K00016	LDH, ldh; L-lactate dehydrogenase [EC:1.1.1.27]	ko00001	KEGG Orthology	NA	NA	10	Glycolysis _ Gluconeogenesis
K00016	LDH, ldh; L-lactate dehydrogenase [EC:1.1.1.27]	ko00001	KEGG Orthology	NA	NA	270	Cysteine and methionine metabolism
K00016	LDH, ldh; L-lactate dehydrogenase [EC:1.1.1.27]	ko00001	KEGG Orthology	NA	NA	620	Pyruvate metabolism
K00016	LDH, ldh; L-lactate dehydrogenase [EC:1.1.1.27]	ko00001	KEGG Orthology	NA	NA	640	Propanoate metabolism
K00016	LDH, ldh; L-lactate dehydrogenase [EC:1.1.1.27]	ko00001	KEGG Orthology	NA	NA	1100	Metabolic pathways
K00016	LDH, ldh; L-lactate dehydrogenase [EC:1.1.1.27]	ko00001	KEGG Orthology	NA	NA	1110	Biosynthesis of secondary metabolites
K00016	LDH, ldh; L-lactate dehydrogenase [EC:1.1.1.27]	ko00001	KEGG Orthology	NA	NA	1120	Microbial metabolism in diverse environments
K00016	LDH, ldh; L-lactate dehydrogenase [EC:1.1.1.27]	ko00001	KEGG Orthology	NA	NA	4066	HIF-1 signaling pathway
K00016	LDH, ldh; L-lactate dehydrogenase [EC:1.1.1.27]	ko00001	KEGG Orthology	NA	NA	4922	Glucagon signaling pathway
K00016	LDH, ldh; L-lactate dehydrogenase [EC:1.1.1.27]	ko00001	KEGG Orthology	NA	NA	5230	Central carbon metabolism in cancer
K00018	hprA; glycerate dehydrogenase [EC:1.1.1.29]	ko00001	KEGG Orthology	M00346	Formaldehyde assimilation; serine pathway	260	Glycine; serine and threonine metabolism
K00018	hprA; glycerate dehydrogenase [EC:1.1.1.29]	ko00001	KEGG Orthology	M00346	Formaldehyde assimilation; serine pathway	630	Glyoxylate and dicarboxylate metabolism
K00018	hprA; glycerate dehydrogenase [EC:1.1.1.29]	ko00001	KEGG Orthology	M00346	Formaldehyde assimilation; serine pathway	680	Methane metabolism
K00018	hprA; glycerate dehydrogenase [EC:1.1.1.29]	ko00001	KEGG Orthology	M00346	Formaldehyde assimilation; serine pathway	1100	Metabolic pathways
K00018	hprA; glycerate dehydrogenase [EC:1.1.1.29]	ko00001	KEGG Orthology	M00346	Formaldehyde assimilation; serine pathway	1110	Biosynthesis of secondary metabolites
K00018	hprA; glycerate dehydrogenase [EC:1.1.1.29]	ko00001	KEGG Orthology	M00346	Formaldehyde assimilation; serine pathway	1120	Microbial metabolism in diverse environments
K00018	hprA; glycerate dehydrogenase [EC:1.1.1.29]	ko00001	KEGG Orthology	M00346	Formaldehyde assimilation; serine pathway	1200	Carbon metabolism
K00019	BDH1, bdhA; 3-hydroxybutyrate dehydrogenase [EC:1.1.1.30]	ko00001	KEGG Orthology	M00088	Ketone body biosynthesis; acetyl-CoA => acetoacetate_3-hydroxybutyrate_acetone	650	Butanoate metabolism
K00019	BDH1, bdhA; 3-hydroxybutyrate dehydrogenase [EC:1.1.1.30]	ko00001	KEGG Orthology	M00088	Ketone body biosynthesis; acetyl-CoA => acetoacetate_3-hydroxybutyrate_acetone	1100	Metabolic pathways
K00020	HIBADH, mmsB; 3-hydroxyisobutyrate dehydrogenase [EC:1.1.1.31]	ko00001	KEGG Orthology	NA	NA	280	Valine; leucine and isoleucine degradation
K00020	HIBADH, mmsB; 3-hydroxyisobutyrate dehydrogenase [EC:1.1.1.31]	ko00001	KEGG Orthology	NA	NA	1100	Metabolic pathways
K00024	mdh; malate dehydrogenase [EC:1.1.1.37]	ko00001	KEGG Orthology	M00009	Citrate cycle	20	Citrate cycle
K00024	mdh; malate dehydrogenase [EC:1.1.1.37]	ko00001	KEGG Orthology	M00009	Citrate cycle	270	Cysteine and methionine metabolism
K00024	mdh; malate dehydrogenase [EC:1.1.1.37]	ko00001	KEGG Orthology	M00009	Citrate cycle	620	Pyruvate metabolism
K00024	mdh; malate dehydrogenase [EC:1.1.1.37]	ko00001	KEGG Orthology	M00009	Citrate cycle	630	Glyoxylate and dicarboxylate metabolism
K00024	mdh; malate dehydrogenase [EC:1.1.1.37]	ko00001	KEGG Orthology	M00009	Citrate cycle	680	Methane metabolism
K00024	mdh; malate dehydrogenase [EC:1.1.1.37]	ko00001	KEGG Orthology	M00009	Citrate cycle	710	Carbon fixation in photosynthetic organisms
K00024	mdh; malate dehydrogenase [EC:1.1.1.37]	ko00001	KEGG Orthology	M00009	Citrate cycle	720	Carbon fixation pathways in prokaryotes
K00024	mdh; malate dehydrogenase [EC:1.1.1.37]	ko00001	KEGG Orthology	M00009	Citrate cycle	1100	Metabolic pathways
K00024	mdh; malate dehydrogenase [EC:1.1.1.37]	ko00001	KEGG Orthology	M00009	Citrate cycle	1110	Biosynthesis of secondary metabolites
K00024	mdh; malate dehydrogenase [EC:1.1.1.37]	ko00001	KEGG Orthology	M00009	Citrate cycle	1120	Microbial metabolism in diverse environments
K00024	mdh; malate dehydrogenase [EC:1.1.1.37]	ko00001	KEGG Orthology	M00009	Citrate cycle	1200	Carbon metabolism
K00024	mdh; malate dehydrogenase [EC:1.1.1.37]	ko00001	KEGG Orthology	M00011	Citrate cycle; second carbon oxidation; 2-oxoglutarate => oxaloacetate	20	Citrate cycle
K00024	mdh; malate dehydrogenase [EC:1.1.1.37]	ko00001	KEGG Orthology	M00011	Citrate cycle; second carbon oxidation; 2-oxoglutarate => oxaloacetate	270	Cysteine and methionine metabolism
K00024	mdh; malate dehydrogenase [EC:1.1.1.37]	ko00001	KEGG Orthology	M00011	Citrate cycle; second carbon oxidation; 2-oxoglutarate => oxaloacetate	620	Pyruvate metabolism
K00024	mdh; malate dehydrogenase [EC:1.1.1.37]	ko00001	KEGG Orthology	M00011	Citrate cycle; second carbon oxidation; 2-oxoglutarate => oxaloacetate	630	Glyoxylate and dicarboxylate metabolism
K00024	mdh; malate dehydrogenase [EC:1.1.1.37]	ko00001	KEGG Orthology	M00011	Citrate cycle; second carbon oxidation; 2-oxoglutarate => oxaloacetate	680	Methane metabolism
K00024	mdh; malate dehydrogenase [EC:1.1.1.37]	ko00001	KEGG Orthology	M00011	Citrate cycle; second carbon oxidation; 2-oxoglutarate => oxaloacetate	710	Carbon fixation in photosynthetic organisms
K00024	mdh; malate dehydrogenase [EC:1.1.1.37]	ko00001	KEGG Orthology	M00011	Citrate cycle; second carbon oxidation; 2-oxoglutarate => oxaloacetate	720	Carbon fixation pathways in prokaryotes
K00024	mdh; malate dehydrogenase [EC:1.1.1.37]	ko00001	KEGG Orthology	M00011	Citrate cycle; second carbon oxidation; 2-oxoglutarate => oxaloacetate	1100	Metabolic pathways
K00024	mdh; malate dehydrogenase [EC:1.1.1.37]	ko00001	KEGG Orthology	M00011	Citrate cycle; second carbon oxidation; 2-oxoglutarate => oxaloacetate	1110	Biosynthesis of secondary metabolites
K00024	mdh; malate dehydrogenase [EC:1.1.1.37]	ko00001	KEGG Orthology	M00011	Citrate cycle; second carbon oxidation; 2-oxoglutarate => oxaloacetate	1120	Microbial metabolism in diverse environments
K00024	mdh; malate dehydrogenase [EC:1.1.1.37]	ko00001	KEGG Orthology	M00011	Citrate cycle; second carbon oxidation; 2-oxoglutarate => oxaloacetate	1200	Carbon metabolism
K00024	mdh; malate dehydrogenase [EC:1.1.1.37]	ko00001	KEGG Orthology	M00012	Glyoxylate cycle	20	Citrate cycle
K00024	mdh; malate dehydrogenase [EC:1.1.1.37]	ko00001	KEGG Orthology	M00012	Glyoxylate cycle	270	Cysteine and methionine metabolism
K00024	mdh; malate dehydrogenase [EC:1.1.1.37]	ko00001	KEGG Orthology	M00012	Glyoxylate cycle	620	Pyruvate metabolism
K00024	mdh; malate dehydrogenase [EC:1.1.1.37]	ko00001	KEGG Orthology	M00012	Glyoxylate cycle	630	Glyoxylate and dicarboxylate metabolism
K00024	mdh; malate dehydrogenase [EC:1.1.1.37]	ko00001	KEGG Orthology	M00012	Glyoxylate cycle	680	Methane metabolism
K00024	mdh; malate dehydrogenase [EC:1.1.1.37]	ko00001	KEGG Orthology	M00012	Glyoxylate cycle	710	Carbon fixation in photosynthetic organisms
K00024	mdh; malate dehydrogenase [EC:1.1.1.37]	ko00001	KEGG Orthology	M00012	Glyoxylate cycle	720	Carbon fixation pathways in prokaryotes
K00024	mdh; malate dehydrogenase [EC:1.1.1.37]	ko00001	KEGG Orthology	M00012	Glyoxylate cycle	1100	Metabolic pathways
K00024	mdh; malate dehydrogenase [EC:1.1.1.37]	ko00001	KEGG Orthology	M00012	Glyoxylate cycle	1110	Biosynthesis of secondary metabolites
K00024	mdh; malate dehydrogenase [EC:1.1.1.37]	ko00001	KEGG Orthology	M00012	Glyoxylate cycle	1120	Microbial metabolism in diverse environments
K00024	mdh; malate dehydrogenase [EC:1.1.1.37]	ko00001	KEGG Orthology	M00012	Glyoxylate cycle	1200	Carbon metabolism
K00024	mdh; malate dehydrogenase [EC:1.1.1.37]	ko00001	KEGG Orthology	M00168	CAM	20	Citrate cycle
K00024	mdh; malate dehydrogenase [EC:1.1.1.37]	ko00001	KEGG Orthology	M00168	CAM	270	Cysteine and methionine metabolism
K00024	mdh; malate dehydrogenase [EC:1.1.1.37]	ko00001	KEGG Orthology	M00168	CAM	620	Pyruvate metabolism
K00024	mdh; malate dehydrogenase [EC:1.1.1.37]	ko00001	KEGG Orthology	M00168	CAM	630	Glyoxylate and dicarboxylate metabolism
K00024	mdh; malate dehydrogenase [EC:1.1.1.37]	ko00001	KEGG Orthology	M00168	CAM	680	Methane metabolism
K00024	mdh; malate dehydrogenase [EC:1.1.1.37]	ko00001	KEGG Orthology	M00168	CAM	710	Carbon fixation in photosynthetic organisms
K00024	mdh; malate dehydrogenase [EC:1.1.1.37]	ko00001	KEGG Orthology	M00168	CAM	720	Carbon fixation pathways in prokaryotes
K00024	mdh; malate dehydrogenase [EC:1.1.1.37]	ko00001	KEGG Orthology	M00168	CAM	1100	Metabolic pathways
K00024	mdh; malate dehydrogenase [EC:1.1.1.37]	ko00001	KEGG Orthology	M00168	CAM	1110	Biosynthesis of secondary metabolites
K00024	mdh; malate dehydrogenase [EC:1.1.1.37]	ko00001	KEGG Orthology	M00168	CAM	1120	Microbial metabolism in diverse environments
K00024	mdh; malate dehydrogenase [EC:1.1.1.37]	ko00001	KEGG Orthology	M00168	CAM	1200	Carbon metabolism
K00024	mdh; malate dehydrogenase [EC:1.1.1.37]	ko00001	KEGG Orthology	M00173	Reductive citrate cycle	20	Citrate cycle
K00024	mdh; malate dehydrogenase [EC:1.1.1.37]	ko00001	KEGG Orthology	M00173	Reductive citrate cycle	270	Cysteine and methionine metabolism
K00024	mdh; malate dehydrogenase [EC:1.1.1.37]	ko00001	KEGG Orthology	M00173	Reductive citrate cycle	620	Pyruvate metabolism
K00024	mdh; malate dehydrogenase [EC:1.1.1.37]	ko00001	KEGG Orthology	M00173	Reductive citrate cycle	630	Glyoxylate and dicarboxylate metabolism
K00024	mdh; malate dehydrogenase [EC:1.1.1.37]	ko00001	KEGG Orthology	M00173	Reductive citrate cycle	680	Methane metabolism
K00024	mdh; malate dehydrogenase [EC:1.1.1.37]	ko00001	KEGG Orthology	M00173	Reductive citrate cycle	710	Carbon fixation in photosynthetic organisms
K00024	mdh; malate dehydrogenase [EC:1.1.1.37]	ko00001	KEGG Orthology	M00173	Reductive citrate cycle	720	Carbon fixation pathways in prokaryotes
K00024	mdh; malate dehydrogenase [EC:1.1.1.37]	ko00001	KEGG Orthology	M00173	Reductive citrate cycle	1100	Metabolic pathways
K00024	mdh; malate dehydrogenase [EC:1.1.1.37]	ko00001	KEGG Orthology	M00173	Reductive citrate cycle	1110	Biosynthesis of secondary metabolites
K00024	mdh; malate dehydrogenase [EC:1.1.1.37]	ko00001	KEGG Orthology	M00173	Reductive citrate cycle	1120	Microbial metabolism in diverse environments
K00024	mdh; malate dehydrogenase [EC:1.1.1.37]	ko00001	KEGG Orthology	M00173	Reductive citrate cycle	1200	Carbon metabolism
K00024	mdh; malate dehydrogenase [EC:1.1.1.37]	ko00001	KEGG Orthology	M00346	Formaldehyde assimilation; serine pathway	20	Citrate cycle
K00024	mdh; malate dehydrogenase [EC:1.1.1.37]	ko00001	KEGG Orthology	M00346	Formaldehyde assimilation; serine pathway	270	Cysteine and methionine metabolism
K00024	mdh; malate dehydrogenase [EC:1.1.1.37]	ko00001	KEGG Orthology	M00346	Formaldehyde assimilation; serine pathway	620	Pyruvate metabolism
K00024	mdh; malate dehydrogenase [EC:1.1.1.37]	ko00001	KEGG Orthology	M00346	Formaldehyde assimilation; serine pathway	630	Glyoxylate and dicarboxylate metabolism
K00024	mdh; malate dehydrogenase [EC:1.1.1.37]	ko00001	KEGG Orthology	M00346	Formaldehyde assimilation; serine pathway	680	Methane metabolism
K00024	mdh; malate dehydrogenase [EC:1.1.1.37]	ko00001	KEGG Orthology	M00346	Formaldehyde assimilation; serine pathway	710	Carbon fixation in photosynthetic organisms
K00024	mdh; malate dehydrogenase [EC:1.1.1.37]	ko00001	KEGG Orthology	M00346	Formaldehyde assimilation; serine pathway	720	Carbon fixation pathways in prokaryotes
K00024	mdh; malate dehydrogenase [EC:1.1.1.37]	ko00001	KEGG Orthology	M00346	Formaldehyde assimilation; serine pathway	1100	Metabolic pathways
K00024	mdh; malate dehydrogenase [EC:1.1.1.37]	ko00001	KEGG Orthology	M00346	Formaldehyde assimilation; serine pathway	1110	Biosynthesis of secondary metabolites
K00024	mdh; malate dehydrogenase [EC:1.1.1.37]	ko00001	KEGG Orthology	M00346	Formaldehyde assimilation; serine pathway	1120	Microbial metabolism in diverse environments
K00024	mdh; malate dehydrogenase [EC:1.1.1.37]	ko00001	KEGG Orthology	M00346	Formaldehyde assimilation; serine pathway	1200	Carbon metabolism
K00024	mdh; malate dehydrogenase [EC:1.1.1.37]	ko00001	KEGG Orthology	M00374	Dicarboxylate-hydroxybutyrate cycle	20	Citrate cycle
K00024	mdh; malate dehydrogenase [EC:1.1.1.37]	ko00001	KEGG Orthology	M00374	Dicarboxylate-hydroxybutyrate cycle	270	Cysteine and methionine metabolism
K00024	mdh; malate dehydrogenase [EC:1.1.1.37]	ko00001	KEGG Orthology	M00374	Dicarboxylate-hydroxybutyrate cycle	620	Pyruvate metabolism
K00024	mdh; malate dehydrogenase [EC:1.1.1.37]	ko00001	KEGG Orthology	M00374	Dicarboxylate-hydroxybutyrate cycle	630	Glyoxylate and dicarboxylate metabolism
K00024	mdh; malate dehydrogenase [EC:1.1.1.37]	ko00001	KEGG Orthology	M00374	Dicarboxylate-hydroxybutyrate cycle	680	Methane metabolism
K00024	mdh; malate dehydrogenase [EC:1.1.1.37]	ko00001	KEGG Orthology	M00374	Dicarboxylate-hydroxybutyrate cycle	710	Carbon fixation in photosynthetic organisms
K00024	mdh; malate dehydrogenase [EC:1.1.1.37]	ko00001	KEGG Orthology	M00374	Dicarboxylate-hydroxybutyrate cycle	720	Carbon fixation pathways in prokaryotes
K00024	mdh; malate dehydrogenase [EC:1.1.1.37]	ko00001	KEGG Orthology	M00374	Dicarboxylate-hydroxybutyrate cycle	1100	Metabolic pathways
K00024	mdh; malate dehydrogenase [EC:1.1.1.37]	ko00001	KEGG Orthology	M00374	Dicarboxylate-hydroxybutyrate cycle	1110	Biosynthesis of secondary metabolites
K00024	mdh; malate dehydrogenase [EC:1.1.1.37]	ko00001	KEGG Orthology	M00374	Dicarboxylate-hydroxybutyrate cycle	1120	Microbial metabolism in diverse environments
K00024	mdh; malate dehydrogenase [EC:1.1.1.37]	ko00001	KEGG Orthology	M00374	Dicarboxylate-hydroxybutyrate cycle	1200	Carbon metabolism
K00024	mdh; malate dehydrogenase [EC:1.1.1.37]	ko00001	KEGG Orthology	M00620	Incomplete reductive citrate cycle; acetyl-CoA => oxoglutarate	20	Citrate cycle
K00024	mdh; malate dehydrogenase [EC:1.1.1.37]	ko00001	KEGG Orthology	M00620	Incomplete reductive citrate cycle; acetyl-CoA => oxoglutarate	270	Cysteine and methionine metabolism
K00024	mdh; malate dehydrogenase [EC:1.1.1.37]	ko00001	KEGG Orthology	M00620	Incomplete reductive citrate cycle; acetyl-CoA => oxoglutarate	620	Pyruvate metabolism
K00024	mdh; malate dehydrogenase [EC:1.1.1.37]	ko00001	KEGG Orthology	M00620	Incomplete reductive citrate cycle; acetyl-CoA => oxoglutarate	630	Glyoxylate and dicarboxylate metabolism
K00024	mdh; malate dehydrogenase [EC:1.1.1.37]	ko00001	KEGG Orthology	M00620	Incomplete reductive citrate cycle; acetyl-CoA => oxoglutarate	680	Methane metabolism
K00024	mdh; malate dehydrogenase [EC:1.1.1.37]	ko00001	KEGG Orthology	M00620	Incomplete reductive citrate cycle; acetyl-CoA => oxoglutarate	710	Carbon fixation in photosynthetic organisms
K00024	mdh; malate dehydrogenase [EC:1.1.1.37]	ko00001	KEGG Orthology	M00620	Incomplete reductive citrate cycle; acetyl-CoA => oxoglutarate	720	Carbon fixation pathways in prokaryotes
K00024	mdh; malate dehydrogenase [EC:1.1.1.37]	ko00001	KEGG Orthology	M00620	Incomplete reductive citrate cycle; acetyl-CoA => oxoglutarate	1100	Metabolic pathways
K00024	mdh; malate dehydrogenase [EC:1.1.1.37]	ko00001	KEGG Orthology	M00620	Incomplete reductive citrate cycle; acetyl-CoA => oxoglutarate	1110	Biosynthesis of secondary metabolites
K00024	mdh; malate dehydrogenase [EC:1.1.1.37]	ko00001	KEGG Orthology	M00620	Incomplete reductive citrate cycle; acetyl-CoA => oxoglutarate	1120	Microbial metabolism in diverse environments
K00024	mdh; malate dehydrogenase [EC:1.1.1.37]	ko00001	KEGG Orthology	M00620	Incomplete reductive citrate cycle; acetyl-CoA => oxoglutarate	1200	Carbon metabolism
K00024	mdh; malate dehydrogenase [EC:1.1.1.37]	ko00001	KEGG Orthology	M00740	Methylaspartate cycle	20	Citrate cycle
K00024	mdh; malate dehydrogenase [EC:1.1.1.37]	ko00001	KEGG Orthology	M00740	Methylaspartate cycle	270	Cysteine and methionine metabolism
K00024	mdh; malate dehydrogenase [EC:1.1.1.37]	ko00001	KEGG Orthology	M00740	Methylaspartate cycle	620	Pyruvate metabolism
K00024	mdh; malate dehydrogenase [EC:1.1.1.37]	ko00001	KEGG Orthology	M00740	Methylaspartate cycle	630	Glyoxylate and dicarboxylate metabolism
K00024	mdh; malate dehydrogenase [EC:1.1.1.37]	ko00001	KEGG Orthology	M00740	Methylaspartate cycle	680	Methane metabolism
K00024	mdh; malate dehydrogenase [EC:1.1.1.37]	ko00001	KEGG Orthology	M00740	Methylaspartate cycle	710	Carbon fixation in photosynthetic organisms
K00024	mdh; malate dehydrogenase [EC:1.1.1.37]	ko00001	KEGG Orthology	M00740	Methylaspartate cycle	720	Carbon fixation pathways in prokaryotes
K00024	mdh; malate dehydrogenase [EC:1.1.1.37]	ko00001	KEGG Orthology	M00740	Methylaspartate cycle	1100	Metabolic pathways
K00024	mdh; malate dehydrogenase [EC:1.1.1.37]	ko00001	KEGG Orthology	M00740	Methylaspartate cycle	1110	Biosynthesis of secondary metabolites
K00024	mdh; malate dehydrogenase [EC:1.1.1.37]	ko00001	KEGG Orthology	M00740	Methylaspartate cycle	1120	Microbial metabolism in diverse environments
K00024	mdh; malate dehydrogenase [EC:1.1.1.37]	ko00001	KEGG Orthology	M00740	Methylaspartate cycle	1200	Carbon metabolism
K00027	ME2, sfcA, maeA; malate dehydrogenase [EC:1.1.1.38]	ko00001	KEGG Orthology	NA	NA	620	Pyruvate metabolism
K00027	ME2, sfcA, maeA; malate dehydrogenase [EC:1.1.1.38]	ko00001	KEGG Orthology	NA	NA	1200	Carbon metabolism
K00027	ME2, sfcA, maeA; malate dehydrogenase [EC:1.1.1.38]	ko00001	KEGG Orthology	NA	NA	2020	Two-component system
K00029	E1.1.1.40, maeB; malate dehydrogenase [EC:1.1.1.40]	ko00001	KEGG Orthology	M00169	CAM	620	Pyruvate metabolism
K00029	E1.1.1.40, maeB; malate dehydrogenase [EC:1.1.1.40]	ko00001	KEGG Orthology	M00169	CAM	710	Carbon fixation in photosynthetic organisms
K00029	E1.1.1.40, maeB; malate dehydrogenase [EC:1.1.1.40]	ko00001	KEGG Orthology	M00169	CAM	1100	Metabolic pathways
K00029	E1.1.1.40, maeB; malate dehydrogenase [EC:1.1.1.40]	ko00001	KEGG Orthology	M00169	CAM	1120	Microbial metabolism in diverse environments
K00029	E1.1.1.40, maeB; malate dehydrogenase [EC:1.1.1.40]	ko00001	KEGG Orthology	M00169	CAM	1200	Carbon metabolism
K00029	E1.1.1.40, maeB; malate dehydrogenase [EC:1.1.1.40]	ko00001	KEGG Orthology	M00169	CAM	3320	PPAR signaling pathway
K00029	E1.1.1.40, maeB; malate dehydrogenase [EC:1.1.1.40]	ko00001	KEGG Orthology	M00172	C4-dicarboxylic acid cycle; NADP - malic enzyme type	620	Pyruvate metabolism
K00029	E1.1.1.40, maeB; malate dehydrogenase [EC:1.1.1.40]	ko00001	KEGG Orthology	M00172	C4-dicarboxylic acid cycle; NADP - malic enzyme type	710	Carbon fixation in photosynthetic organisms
K00029	E1.1.1.40, maeB; malate dehydrogenase [EC:1.1.1.40]	ko00001	KEGG Orthology	M00172	C4-dicarboxylic acid cycle; NADP - malic enzyme type	1100	Metabolic pathways
K00029	E1.1.1.40, maeB; malate dehydrogenase [EC:1.1.1.40]	ko00001	KEGG Orthology	M00172	C4-dicarboxylic acid cycle; NADP - malic enzyme type	1120	Microbial metabolism in diverse environments
K00029	E1.1.1.40, maeB; malate dehydrogenase [EC:1.1.1.40]	ko00001	KEGG Orthology	M00172	C4-dicarboxylic acid cycle; NADP - malic enzyme type	1200	Carbon metabolism
K00029	E1.1.1.40, maeB; malate dehydrogenase [EC:1.1.1.40]	ko00001	KEGG Orthology	M00172	C4-dicarboxylic acid cycle; NADP - malic enzyme type	3320	PPAR signaling pathway
K00030	IDH3; isocitrate dehydrogenase [EC:1.1.1.41]	ko00001	KEGG Orthology	M00009	Citrate cycle	20	Citrate cycle
K00030	IDH3; isocitrate dehydrogenase [EC:1.1.1.41]	ko00001	KEGG Orthology	M00009	Citrate cycle	1100	Metabolic pathways
K00030	IDH3; isocitrate dehydrogenase [EC:1.1.1.41]	ko00001	KEGG Orthology	M00009	Citrate cycle	1110	Biosynthesis of secondary metabolites
K00030	IDH3; isocitrate dehydrogenase [EC:1.1.1.41]	ko00001	KEGG Orthology	M00009	Citrate cycle	1120	Microbial metabolism in diverse environments
K00030	IDH3; isocitrate dehydrogenase [EC:1.1.1.41]	ko00001	KEGG Orthology	M00009	Citrate cycle	1200	Carbon metabolism
K00030	IDH3; isocitrate dehydrogenase [EC:1.1.1.41]	ko00001	KEGG Orthology	M00009	Citrate cycle	1210	2-Oxocarboxylic acid metabolism
K00030	IDH3; isocitrate dehydrogenase [EC:1.1.1.41]	ko00001	KEGG Orthology	M00009	Citrate cycle	1230	Biosynthesis of amino acids
K00030	IDH3; isocitrate dehydrogenase [EC:1.1.1.41]	ko00001	KEGG Orthology	M00010	Citrate cycle; first carbon oxidation; oxaloacetate => 2-oxoglutarate	20	Citrate cycle
K00030	IDH3; isocitrate dehydrogenase [EC:1.1.1.41]	ko00001	KEGG Orthology	M00010	Citrate cycle; first carbon oxidation; oxaloacetate => 2-oxoglutarate	1100	Metabolic pathways
K00030	IDH3; isocitrate dehydrogenase [EC:1.1.1.41]	ko00001	KEGG Orthology	M00010	Citrate cycle; first carbon oxidation; oxaloacetate => 2-oxoglutarate	1110	Biosynthesis of secondary metabolites
K00030	IDH3; isocitrate dehydrogenase [EC:1.1.1.41]	ko00001	KEGG Orthology	M00010	Citrate cycle; first carbon oxidation; oxaloacetate => 2-oxoglutarate	1120	Microbial metabolism in diverse environments
K00030	IDH3; isocitrate dehydrogenase [EC:1.1.1.41]	ko00001	KEGG Orthology	M00010	Citrate cycle; first carbon oxidation; oxaloacetate => 2-oxoglutarate	1200	Carbon metabolism
K00030	IDH3; isocitrate dehydrogenase [EC:1.1.1.41]	ko00001	KEGG Orthology	M00010	Citrate cycle; first carbon oxidation; oxaloacetate => 2-oxoglutarate	1210	2-Oxocarboxylic acid metabolism
K00030	IDH3; isocitrate dehydrogenase [EC:1.1.1.41]	ko00001	KEGG Orthology	M00010	Citrate cycle; first carbon oxidation; oxaloacetate => 2-oxoglutarate	1230	Biosynthesis of amino acids
K00031	IDH1, IDH2, icd; isocitrate dehydrogenase [EC:1.1.1.42]	ko00001	KEGG Orthology	M00009	Citrate cycle	20	Citrate cycle
K00031	IDH1, IDH2, icd; isocitrate dehydrogenase [EC:1.1.1.42]	ko00001	KEGG Orthology	M00009	Citrate cycle	480	Glutathione metabolism
K00031	IDH1, IDH2, icd; isocitrate dehydrogenase [EC:1.1.1.42]	ko00001	KEGG Orthology	M00009	Citrate cycle	720	Carbon fixation pathways in prokaryotes
K00031	IDH1, IDH2, icd; isocitrate dehydrogenase [EC:1.1.1.42]	ko00001	KEGG Orthology	M00009	Citrate cycle	1100	Metabolic pathways
K00031	IDH1, IDH2, icd; isocitrate dehydrogenase [EC:1.1.1.42]	ko00001	KEGG Orthology	M00009	Citrate cycle	1110	Biosynthesis of secondary metabolites
K00031	IDH1, IDH2, icd; isocitrate dehydrogenase [EC:1.1.1.42]	ko00001	KEGG Orthology	M00009	Citrate cycle	1120	Microbial metabolism in diverse environments
K00031	IDH1, IDH2, icd; isocitrate dehydrogenase [EC:1.1.1.42]	ko00001	KEGG Orthology	M00009	Citrate cycle	1200	Carbon metabolism
K00031	IDH1, IDH2, icd; isocitrate dehydrogenase [EC:1.1.1.42]	ko00001	KEGG Orthology	M00009	Citrate cycle	1210	2-Oxocarboxylic acid metabolism
K00031	IDH1, IDH2, icd; isocitrate dehydrogenase [EC:1.1.1.42]	ko00001	KEGG Orthology	M00009	Citrate cycle	1230	Biosynthesis of amino acids
K00031	IDH1, IDH2, icd; isocitrate dehydrogenase [EC:1.1.1.42]	ko00001	KEGG Orthology	M00009	Citrate cycle	4146	Peroxisome
K00031	IDH1, IDH2, icd; isocitrate dehydrogenase [EC:1.1.1.42]	ko00001	KEGG Orthology	M00009	Citrate cycle	5230	Central carbon metabolism in cancer
K00031	IDH1, IDH2, icd; isocitrate dehydrogenase [EC:1.1.1.42]	ko00001	KEGG Orthology	M00010	Citrate cycle; first carbon oxidation; oxaloacetate => 2-oxoglutarate	20	Citrate cycle
K00031	IDH1, IDH2, icd; isocitrate dehydrogenase [EC:1.1.1.42]	ko00001	KEGG Orthology	M00010	Citrate cycle; first carbon oxidation; oxaloacetate => 2-oxoglutarate	480	Glutathione metabolism
K00031	IDH1, IDH2, icd; isocitrate dehydrogenase [EC:1.1.1.42]	ko00001	KEGG Orthology	M00010	Citrate cycle; first carbon oxidation; oxaloacetate => 2-oxoglutarate	720	Carbon fixation pathways in prokaryotes
K00031	IDH1, IDH2, icd; isocitrate dehydrogenase [EC:1.1.1.42]	ko00001	KEGG Orthology	M00010	Citrate cycle; first carbon oxidation; oxaloacetate => 2-oxoglutarate	1100	Metabolic pathways
K00031	IDH1, IDH2, icd; isocitrate dehydrogenase [EC:1.1.1.42]	ko00001	KEGG Orthology	M00010	Citrate cycle; first carbon oxidation; oxaloacetate => 2-oxoglutarate	1110	Biosynthesis of secondary metabolites
K00031	IDH1, IDH2, icd; isocitrate dehydrogenase [EC:1.1.1.42]	ko00001	KEGG Orthology	M00010	Citrate cycle; first carbon oxidation; oxaloacetate => 2-oxoglutarate	1120	Microbial metabolism in diverse environments
K00031	IDH1, IDH2, icd; isocitrate dehydrogenase [EC:1.1.1.42]	ko00001	KEGG Orthology	M00010	Citrate cycle; first carbon oxidation; oxaloacetate => 2-oxoglutarate	1200	Carbon metabolism
K00031	IDH1, IDH2, icd; isocitrate dehydrogenase [EC:1.1.1.42]	ko00001	KEGG Orthology	M00010	Citrate cycle; first carbon oxidation; oxaloacetate => 2-oxoglutarate	1210	2-Oxocarboxylic acid metabolism
K00031	IDH1, IDH2, icd; isocitrate dehydrogenase [EC:1.1.1.42]	ko00001	KEGG Orthology	M00010	Citrate cycle; first carbon oxidation; oxaloacetate => 2-oxoglutarate	1230	Biosynthesis of amino acids
K00031	IDH1, IDH2, icd; isocitrate dehydrogenase [EC:1.1.1.42]	ko00001	KEGG Orthology	M00010	Citrate cycle; first carbon oxidation; oxaloacetate => 2-oxoglutarate	4146	Peroxisome
K00031	IDH1, IDH2, icd; isocitrate dehydrogenase [EC:1.1.1.42]	ko00001	KEGG Orthology	M00010	Citrate cycle; first carbon oxidation; oxaloacetate => 2-oxoglutarate	5230	Central carbon metabolism in cancer
K00031	IDH1, IDH2, icd; isocitrate dehydrogenase [EC:1.1.1.42]	ko00001	KEGG Orthology	M00173	Reductive citrate cycle	20	Citrate cycle
K00031	IDH1, IDH2, icd; isocitrate dehydrogenase [EC:1.1.1.42]	ko00001	KEGG Orthology	M00173	Reductive citrate cycle	480	Glutathione metabolism
K00031	IDH1, IDH2, icd; isocitrate dehydrogenase [EC:1.1.1.42]	ko00001	KEGG Orthology	M00173	Reductive citrate cycle	720	Carbon fixation pathways in prokaryotes
K00031	IDH1, IDH2, icd; isocitrate dehydrogenase [EC:1.1.1.42]	ko00001	KEGG Orthology	M00173	Reductive citrate cycle	1100	Metabolic pathways
K00031	IDH1, IDH2, icd; isocitrate dehydrogenase [EC:1.1.1.42]	ko00001	KEGG Orthology	M00173	Reductive citrate cycle	1110	Biosynthesis of secondary metabolites
K00031	IDH1, IDH2, icd; isocitrate dehydrogenase [EC:1.1.1.42]	ko00001	KEGG Orthology	M00173	Reductive citrate cycle	1120	Microbial metabolism in diverse environments
K00031	IDH1, IDH2, icd; isocitrate dehydrogenase [EC:1.1.1.42]	ko00001	KEGG Orthology	M00173	Reductive citrate cycle	1200	Carbon metabolism
K00031	IDH1, IDH2, icd; isocitrate dehydrogenase [EC:1.1.1.42]	ko00001	KEGG Orthology	M00173	Reductive citrate cycle	1210	2-Oxocarboxylic acid metabolism
K00031	IDH1, IDH2, icd; isocitrate dehydrogenase [EC:1.1.1.42]	ko00001	KEGG Orthology	M00173	Reductive citrate cycle	1230	Biosynthesis of amino acids
K00031	IDH1, IDH2, icd; isocitrate dehydrogenase [EC:1.1.1.42]	ko00001	KEGG Orthology	M00173	Reductive citrate cycle	4146	Peroxisome
K00031	IDH1, IDH2, icd; isocitrate dehydrogenase [EC:1.1.1.42]	ko00001	KEGG Orthology	M00173	Reductive citrate cycle	5230	Central carbon metabolism in cancer
K00031	IDH1, IDH2, icd; isocitrate dehydrogenase [EC:1.1.1.42]	ko00001	KEGG Orthology	M00740	Methylaspartate cycle	20	Citrate cycle
K00031	IDH1, IDH2, icd; isocitrate dehydrogenase [EC:1.1.1.42]	ko00001	KEGG Orthology	M00740	Methylaspartate cycle	480	Glutathione metabolism
K00031	IDH1, IDH2, icd; isocitrate dehydrogenase [EC:1.1.1.42]	ko00001	KEGG Orthology	M00740	Methylaspartate cycle	720	Carbon fixation pathways in prokaryotes
K00031	IDH1, IDH2, icd; isocitrate dehydrogenase [EC:1.1.1.42]	ko00001	KEGG Orthology	M00740	Methylaspartate cycle	1100	Metabolic pathways
K00031	IDH1, IDH2, icd; isocitrate dehydrogenase [EC:1.1.1.42]	ko00001	KEGG Orthology	M00740	Methylaspartate cycle	1110	Biosynthesis of secondary metabolites
K00031	IDH1, IDH2, icd; isocitrate dehydrogenase [EC:1.1.1.42]	ko00001	KEGG Orthology	M00740	Methylaspartate cycle	1120	Microbial metabolism in diverse environments
K00031	IDH1, IDH2, icd; isocitrate dehydrogenase [EC:1.1.1.42]	ko00001	KEGG Orthology	M00740	Methylaspartate cycle	1200	Carbon metabolism
K00031	IDH1, IDH2, icd; isocitrate dehydrogenase [EC:1.1.1.42]	ko00001	KEGG Orthology	M00740	Methylaspartate cycle	1210	2-Oxocarboxylic acid metabolism
K00031	IDH1, IDH2, icd; isocitrate dehydrogenase [EC:1.1.1.42]	ko00001	KEGG Orthology	M00740	Methylaspartate cycle	1230	Biosynthesis of amino acids
K00031	IDH1, IDH2, icd; isocitrate dehydrogenase [EC:1.1.1.42]	ko00001	KEGG Orthology	M00740	Methylaspartate cycle	4146	Peroxisome
K00031	IDH1, IDH2, icd; isocitrate dehydrogenase [EC:1.1.1.42]	ko00001	KEGG Orthology	M00740	Methylaspartate cycle	5230	Central carbon metabolism in cancer
K00033	PGD, gnd, gntZ; 6-phosphogluconate dehydrogenase [EC:1.1.1.44 1.1.1.343]	ko00001	KEGG Orthology	M00004	Pentose phosphate pathway	30	Pentose phosphate pathway
K00033	PGD, gnd, gntZ; 6-phosphogluconate dehydrogenase [EC:1.1.1.44 1.1.1.343]	ko00001	KEGG Orthology	M00004	Pentose phosphate pathway	480	Glutathione metabolism
K00033	PGD, gnd, gntZ; 6-phosphogluconate dehydrogenase [EC:1.1.1.44 1.1.1.343]	ko00001	KEGG Orthology	M00004	Pentose phosphate pathway	1100	Metabolic pathways
K00033	PGD, gnd, gntZ; 6-phosphogluconate dehydrogenase [EC:1.1.1.44 1.1.1.343]	ko00001	KEGG Orthology	M00004	Pentose phosphate pathway	1110	Biosynthesis of secondary metabolites
K00033	PGD, gnd, gntZ; 6-phosphogluconate dehydrogenase [EC:1.1.1.44 1.1.1.343]	ko00001	KEGG Orthology	M00004	Pentose phosphate pathway	1120	Microbial metabolism in diverse environments
K00033	PGD, gnd, gntZ; 6-phosphogluconate dehydrogenase [EC:1.1.1.44 1.1.1.343]	ko00001	KEGG Orthology	M00004	Pentose phosphate pathway	1200	Carbon metabolism
K00033	PGD, gnd, gntZ; 6-phosphogluconate dehydrogenase [EC:1.1.1.44 1.1.1.343]	ko00001	KEGG Orthology	M00006	Pentose phosphate pathway; oxidative phase; glucose 6P => ribulose 5P	30	Pentose phosphate pathway
K00033	PGD, gnd, gntZ; 6-phosphogluconate dehydrogenase [EC:1.1.1.44 1.1.1.343]	ko00001	KEGG Orthology	M00006	Pentose phosphate pathway; oxidative phase; glucose 6P => ribulose 5P	480	Glutathione metabolism
K00033	PGD, gnd, gntZ; 6-phosphogluconate dehydrogenase [EC:1.1.1.44 1.1.1.343]	ko00001	KEGG Orthology	M00006	Pentose phosphate pathway; oxidative phase; glucose 6P => ribulose 5P	1100	Metabolic pathways
K00033	PGD, gnd, gntZ; 6-phosphogluconate dehydrogenase [EC:1.1.1.44 1.1.1.343]	ko00001	KEGG Orthology	M00006	Pentose phosphate pathway; oxidative phase; glucose 6P => ribulose 5P	1110	Biosynthesis of secondary metabolites
K00033	PGD, gnd, gntZ; 6-phosphogluconate dehydrogenase [EC:1.1.1.44 1.1.1.343]	ko00001	KEGG Orthology	M00006	Pentose phosphate pathway; oxidative phase; glucose 6P => ribulose 5P	1120	Microbial metabolism in diverse environments
K00033	PGD, gnd, gntZ; 6-phosphogluconate dehydrogenase [EC:1.1.1.44 1.1.1.343]	ko00001	KEGG Orthology	M00006	Pentose phosphate pathway; oxidative phase; glucose 6P => ribulose 5P	1200	Carbon metabolism
K00034	gdh; glucose 1-dehydrogenase [EC:1.1.1.47]	ko00001	KEGG Orthology	NA	NA	30	Pentose phosphate pathway
K00034	gdh; glucose 1-dehydrogenase [EC:1.1.1.47]	ko00001	KEGG Orthology	NA	NA	1100	Metabolic pathways
K00034	gdh; glucose 1-dehydrogenase [EC:1.1.1.47]	ko00001	KEGG Orthology	NA	NA	1120	Microbial metabolism in diverse environments
K00034	gdh; glucose 1-dehydrogenase [EC:1.1.1.47]	ko00001	KEGG Orthology	NA	NA	1200	Carbon metabolism
K00036	G6PD, zwf; glucose-6-phosphate 1-dehydrogenase [EC:1.1.1.49 1.1.1.363]	ko00001	KEGG Orthology	M00004	Pentose phosphate pathway	30	Pentose phosphate pathway
K00036	G6PD, zwf; glucose-6-phosphate 1-dehydrogenase [EC:1.1.1.49 1.1.1.363]	ko00001	KEGG Orthology	M00004	Pentose phosphate pathway	480	Glutathione metabolism
K00036	G6PD, zwf; glucose-6-phosphate 1-dehydrogenase [EC:1.1.1.49 1.1.1.363]	ko00001	KEGG Orthology	M00004	Pentose phosphate pathway	1100	Metabolic pathways
K00036	G6PD, zwf; glucose-6-phosphate 1-dehydrogenase [EC:1.1.1.49 1.1.1.363]	ko00001	KEGG Orthology	M00004	Pentose phosphate pathway	1110	Biosynthesis of secondary metabolites
K00036	G6PD, zwf; glucose-6-phosphate 1-dehydrogenase [EC:1.1.1.49 1.1.1.363]	ko00001	KEGG Orthology	M00004	Pentose phosphate pathway	1120	Microbial metabolism in diverse environments
K00036	G6PD, zwf; glucose-6-phosphate 1-dehydrogenase [EC:1.1.1.49 1.1.1.363]	ko00001	KEGG Orthology	M00004	Pentose phosphate pathway	1200	Carbon metabolism
K00036	G6PD, zwf; glucose-6-phosphate 1-dehydrogenase [EC:1.1.1.49 1.1.1.363]	ko00001	KEGG Orthology	M00004	Pentose phosphate pathway	5230	Central carbon metabolism in cancer
K00036	G6PD, zwf; glucose-6-phosphate 1-dehydrogenase [EC:1.1.1.49 1.1.1.363]	ko00001	KEGG Orthology	M00004	Pentose phosphate pathway	5415	Diabetic cardiomyopathy
K00036	G6PD, zwf; glucose-6-phosphate 1-dehydrogenase [EC:1.1.1.49 1.1.1.363]	ko00001	KEGG Orthology	M00006	Pentose phosphate pathway; oxidative phase; glucose 6P => ribulose 5P	30	Pentose phosphate pathway
K00036	G6PD, zwf; glucose-6-phosphate 1-dehydrogenase [EC:1.1.1.49 1.1.1.363]	ko00001	KEGG Orthology	M00006	Pentose phosphate pathway; oxidative phase; glucose 6P => ribulose 5P	480	Glutathione metabolism
K00036	G6PD, zwf; glucose-6-phosphate 1-dehydrogenase [EC:1.1.1.49 1.1.1.363]	ko00001	KEGG Orthology	M00006	Pentose phosphate pathway; oxidative phase; glucose 6P => ribulose 5P	1100	Metabolic pathways
K00036	G6PD, zwf; glucose-6-phosphate 1-dehydrogenase [EC:1.1.1.49 1.1.1.363]	ko00001	KEGG Orthology	M00006	Pentose phosphate pathway; oxidative phase; glucose 6P => ribulose 5P	1110	Biosynthesis of secondary metabolites
K00036	G6PD, zwf; glucose-6-phosphate 1-dehydrogenase [EC:1.1.1.49 1.1.1.363]	ko00001	KEGG Orthology	M00006	Pentose phosphate pathway; oxidative phase; glucose 6P => ribulose 5P	1120	Microbial metabolism in diverse environments
K00036	G6PD, zwf; glucose-6-phosphate 1-dehydrogenase [EC:1.1.1.49 1.1.1.363]	ko00001	KEGG Orthology	M00006	Pentose phosphate pathway; oxidative phase; glucose 6P => ribulose 5P	1200	Carbon metabolism
K00036	G6PD, zwf; glucose-6-phosphate 1-dehydrogenase [EC:1.1.1.49 1.1.1.363]	ko00001	KEGG Orthology	M00006	Pentose phosphate pathway; oxidative phase; glucose 6P => ribulose 5P	5230	Central carbon metabolism in cancer
K00036	G6PD, zwf; glucose-6-phosphate 1-dehydrogenase [EC:1.1.1.49 1.1.1.363]	ko00001	KEGG Orthology	M00006	Pentose phosphate pathway; oxidative phase; glucose 6P => ribulose 5P	5415	Diabetic cardiomyopathy
K00036	G6PD, zwf; glucose-6-phosphate 1-dehydrogenase [EC:1.1.1.49 1.1.1.363]	ko00001	KEGG Orthology	M00008	Entner-Doudoroff pathway; glucose-6P => glyceraldehyde-3P + pyruvate	30	Pentose phosphate pathway
K00036	G6PD, zwf; glucose-6-phosphate 1-dehydrogenase [EC:1.1.1.49 1.1.1.363]	ko00001	KEGG Orthology	M00008	Entner-Doudoroff pathway; glucose-6P => glyceraldehyde-3P + pyruvate	480	Glutathione metabolism
K00036	G6PD, zwf; glucose-6-phosphate 1-dehydrogenase [EC:1.1.1.49 1.1.1.363]	ko00001	KEGG Orthology	M00008	Entner-Doudoroff pathway; glucose-6P => glyceraldehyde-3P + pyruvate	1100	Metabolic pathways
K00036	G6PD, zwf; glucose-6-phosphate 1-dehydrogenase [EC:1.1.1.49 1.1.1.363]	ko00001	KEGG Orthology	M00008	Entner-Doudoroff pathway; glucose-6P => glyceraldehyde-3P + pyruvate	1110	Biosynthesis of secondary metabolites
K00036	G6PD, zwf; glucose-6-phosphate 1-dehydrogenase [EC:1.1.1.49 1.1.1.363]	ko00001	KEGG Orthology	M00008	Entner-Doudoroff pathway; glucose-6P => glyceraldehyde-3P + pyruvate	1120	Microbial metabolism in diverse environments
K00036	G6PD, zwf; glucose-6-phosphate 1-dehydrogenase [EC:1.1.1.49 1.1.1.363]	ko00001	KEGG Orthology	M00008	Entner-Doudoroff pathway; glucose-6P => glyceraldehyde-3P + pyruvate	1200	Carbon metabolism
K00036	G6PD, zwf; glucose-6-phosphate 1-dehydrogenase [EC:1.1.1.49 1.1.1.363]	ko00001	KEGG Orthology	M00008	Entner-Doudoroff pathway; glucose-6P => glyceraldehyde-3P + pyruvate	5230	Central carbon metabolism in cancer
K00036	G6PD, zwf; glucose-6-phosphate 1-dehydrogenase [EC:1.1.1.49 1.1.1.363]	ko00001	KEGG Orthology	M00008	Entner-Doudoroff pathway; glucose-6P => glyceraldehyde-3P + pyruvate	5415	Diabetic cardiomyopathy
K00039	rbtD; ribitol 2-dehydrogenase [EC:1.1.1.56]	ko00001	KEGG Orthology	NA	NA	40	Pentose and glucuronate interconversions
K00039	rbtD; ribitol 2-dehydrogenase [EC:1.1.1.56]	ko00001	KEGG Orthology	NA	NA	1100	Metabolic pathways
K00040	uxuB; fructuronate reductase [EC:1.1.1.57]	ko00001	KEGG Orthology	M00061	D-Glucuronate degradation; D-glucuronate => pyruvate + D-glyceraldehyde 3P	40	Pentose and glucuronate interconversions
K00040	uxuB; fructuronate reductase [EC:1.1.1.57]	ko00001	KEGG Orthology	M00061	D-Glucuronate degradation; D-glucuronate => pyruvate + D-glyceraldehyde 3P	1100	Metabolic pathways
K00041	uxaB; tagaturonate reductase [EC:1.1.1.58]	ko00001	KEGG Orthology	M00631	D-Galacturonate degradation	40	Pentose and glucuronate interconversions
K00041	uxaB; tagaturonate reductase [EC:1.1.1.58]	ko00001	KEGG Orthology	M00631	D-Galacturonate degradation	1100	Metabolic pathways
K00042	garR, glxR; 2-hydroxy-3-oxopropionate reductase [EC:1.1.1.60]	ko00001	KEGG Orthology	NA	NA	630	Glyoxylate and dicarboxylate metabolism
K00042	garR, glxR; 2-hydroxy-3-oxopropionate reductase [EC:1.1.1.60]	ko00001	KEGG Orthology	NA	NA	1100	Metabolic pathways
K00046	idnO; gluconate 5-dehydrogenase [EC:1.1.1.69]	ko00001	KEGG Orthology	NA	NA	NA	NA
K00048	fucO; lactaldehyde reductase [EC:1.1.1.77]	ko00001	KEGG Orthology	NA	NA	630	Glyoxylate and dicarboxylate metabolism
K00048	fucO; lactaldehyde reductase [EC:1.1.1.77]	ko00001	KEGG Orthology	NA	NA	640	Propanoate metabolism
K00048	fucO; lactaldehyde reductase [EC:1.1.1.77]	ko00001	KEGG Orthology	NA	NA	1100	Metabolic pathways
K00048	fucO; lactaldehyde reductase [EC:1.1.1.77]	ko00001	KEGG Orthology	NA	NA	1120	Microbial metabolism in diverse environments
K00052	leuB, IMDH; 3-isopropylmalate dehydrogenase [EC:1.1.1.85]	ko00001	KEGG Orthology	M00432	Leucine biosynthesis; 2-oxoisovalerate => 2-oxoisocaproate	290	Valine; leucine and isoleucine biosynthesis
K00052	leuB, IMDH; 3-isopropylmalate dehydrogenase [EC:1.1.1.85]	ko00001	KEGG Orthology	M00432	Leucine biosynthesis; 2-oxoisovalerate => 2-oxoisocaproate	660	C5-Branched dibasic acid metabolism
K00052	leuB, IMDH; 3-isopropylmalate dehydrogenase [EC:1.1.1.85]	ko00001	KEGG Orthology	M00432	Leucine biosynthesis; 2-oxoisovalerate => 2-oxoisocaproate	1100	Metabolic pathways
K00052	leuB, IMDH; 3-isopropylmalate dehydrogenase [EC:1.1.1.85]	ko00001	KEGG Orthology	M00432	Leucine biosynthesis; 2-oxoisovalerate => 2-oxoisocaproate	1110	Biosynthesis of secondary metabolites
K00052	leuB, IMDH; 3-isopropylmalate dehydrogenase [EC:1.1.1.85]	ko00001	KEGG Orthology	M00432	Leucine biosynthesis; 2-oxoisovalerate => 2-oxoisocaproate	1210	2-Oxocarboxylic acid metabolism
K00052	leuB, IMDH; 3-isopropylmalate dehydrogenase [EC:1.1.1.85]	ko00001	KEGG Orthology	M00432	Leucine biosynthesis; 2-oxoisovalerate => 2-oxoisocaproate	1230	Biosynthesis of amino acids
K00052	leuB, IMDH; 3-isopropylmalate dehydrogenase [EC:1.1.1.85]	ko00001	KEGG Orthology	M00535	Isoleucine biosynthesis; pyruvate => 2-oxobutanoate	290	Valine; leucine and isoleucine biosynthesis
K00052	leuB, IMDH; 3-isopropylmalate dehydrogenase [EC:1.1.1.85]	ko00001	KEGG Orthology	M00535	Isoleucine biosynthesis; pyruvate => 2-oxobutanoate	660	C5-Branched dibasic acid metabolism
K00052	leuB, IMDH; 3-isopropylmalate dehydrogenase [EC:1.1.1.85]	ko00001	KEGG Orthology	M00535	Isoleucine biosynthesis; pyruvate => 2-oxobutanoate	1100	Metabolic pathways
K00052	leuB, IMDH; 3-isopropylmalate dehydrogenase [EC:1.1.1.85]	ko00001	KEGG Orthology	M00535	Isoleucine biosynthesis; pyruvate => 2-oxobutanoate	1110	Biosynthesis of secondary metabolites
K00052	leuB, IMDH; 3-isopropylmalate dehydrogenase [EC:1.1.1.85]	ko00001	KEGG Orthology	M00535	Isoleucine biosynthesis; pyruvate => 2-oxobutanoate	1210	2-Oxocarboxylic acid metabolism
K00052	leuB, IMDH; 3-isopropylmalate dehydrogenase [EC:1.1.1.85]	ko00001	KEGG Orthology	M00535	Isoleucine biosynthesis; pyruvate => 2-oxobutanoate	1230	Biosynthesis of amino acids
K00053	ilvC; ketol-acid reductoisomerase [EC:1.1.1.86]	ko00001	KEGG Orthology	M00019	Valine_isoleucine biosynthesis; pyruvate => valine _ 2-oxobutanoate => isoleucine	290	Valine; leucine and isoleucine biosynthesis
K00053	ilvC; ketol-acid reductoisomerase [EC:1.1.1.86]	ko00001	KEGG Orthology	M00019	Valine_isoleucine biosynthesis; pyruvate => valine _ 2-oxobutanoate => isoleucine	770	Pantothenate and CoA biosynthesis
K00053	ilvC; ketol-acid reductoisomerase [EC:1.1.1.86]	ko00001	KEGG Orthology	M00019	Valine_isoleucine biosynthesis; pyruvate => valine _ 2-oxobutanoate => isoleucine	1100	Metabolic pathways
K00053	ilvC; ketol-acid reductoisomerase [EC:1.1.1.86]	ko00001	KEGG Orthology	M00019	Valine_isoleucine biosynthesis; pyruvate => valine _ 2-oxobutanoate => isoleucine	1110	Biosynthesis of secondary metabolites
K00053	ilvC; ketol-acid reductoisomerase [EC:1.1.1.86]	ko00001	KEGG Orthology	M00019	Valine_isoleucine biosynthesis; pyruvate => valine _ 2-oxobutanoate => isoleucine	1210	2-Oxocarboxylic acid metabolism
K00053	ilvC; ketol-acid reductoisomerase [EC:1.1.1.86]	ko00001	KEGG Orthology	M00019	Valine_isoleucine biosynthesis; pyruvate => valine _ 2-oxobutanoate => isoleucine	1230	Biosynthesis of amino acids
K00053	ilvC; ketol-acid reductoisomerase [EC:1.1.1.86]	ko00001	KEGG Orthology	M00570	Isoleucine biosynthesis; threonine => 2-oxobutanoate => isoleucine	290	Valine; leucine and isoleucine biosynthesis
K00053	ilvC; ketol-acid reductoisomerase [EC:1.1.1.86]	ko00001	KEGG Orthology	M00570	Isoleucine biosynthesis; threonine => 2-oxobutanoate => isoleucine	770	Pantothenate and CoA biosynthesis
K00053	ilvC; ketol-acid reductoisomerase [EC:1.1.1.86]	ko00001	KEGG Orthology	M00570	Isoleucine biosynthesis; threonine => 2-oxobutanoate => isoleucine	1100	Metabolic pathways
K00053	ilvC; ketol-acid reductoisomerase [EC:1.1.1.86]	ko00001	KEGG Orthology	M00570	Isoleucine biosynthesis; threonine => 2-oxobutanoate => isoleucine	1110	Biosynthesis of secondary metabolites
K00053	ilvC; ketol-acid reductoisomerase [EC:1.1.1.86]	ko00001	KEGG Orthology	M00570	Isoleucine biosynthesis; threonine => 2-oxobutanoate => isoleucine	1210	2-Oxocarboxylic acid metabolism
K00053	ilvC; ketol-acid reductoisomerase [EC:1.1.1.86]	ko00001	KEGG Orthology	M00570	Isoleucine biosynthesis; threonine => 2-oxobutanoate => isoleucine	1230	Biosynthesis of amino acids
K00054	mvaA; hydroxymethylglutaryl-CoA reductase [EC:1.1.1.88]	ko00001	KEGG Orthology	M00849	C5 isoprenoid biosynthesis; mevalonate pathway; archaea	900	Terpenoid backbone biosynthesis
K00054	mvaA; hydroxymethylglutaryl-CoA reductase [EC:1.1.1.88]	ko00001	KEGG Orthology	M00849	C5 isoprenoid biosynthesis; mevalonate pathway; archaea	1110	Biosynthesis of secondary metabolites
K00055	E1.1.1.90; aryl-alcohol dehydrogenase [EC:1.1.1.90]	ko00001	KEGG Orthology	M00537	Xylene degradation; xylene => methylbenzoate	350	Tyrosine metabolism
K00055	E1.1.1.90; aryl-alcohol dehydrogenase [EC:1.1.1.90]	ko00001	KEGG Orthology	M00537	Xylene degradation; xylene => methylbenzoate	360	Phenylalanine metabolism
K00055	E1.1.1.90; aryl-alcohol dehydrogenase [EC:1.1.1.90]	ko00001	KEGG Orthology	M00537	Xylene degradation; xylene => methylbenzoate	622	Xylene degradation
K00055	E1.1.1.90; aryl-alcohol dehydrogenase [EC:1.1.1.90]	ko00001	KEGG Orthology	M00537	Xylene degradation; xylene => methylbenzoate	623	Toluene degradation
K00055	E1.1.1.90; aryl-alcohol dehydrogenase [EC:1.1.1.90]	ko00001	KEGG Orthology	M00537	Xylene degradation; xylene => methylbenzoate	1100	Metabolic pathways
K00055	E1.1.1.90; aryl-alcohol dehydrogenase [EC:1.1.1.90]	ko00001	KEGG Orthology	M00537	Xylene degradation; xylene => methylbenzoate	1120	Microbial metabolism in diverse environments
K00055	E1.1.1.90; aryl-alcohol dehydrogenase [EC:1.1.1.90]	ko00001	KEGG Orthology	M00537	Xylene degradation; xylene => methylbenzoate	1220	Degradation of aromatic compounds
K00055	E1.1.1.90; aryl-alcohol dehydrogenase [EC:1.1.1.90]	ko00001	KEGG Orthology	M00538	Toluene degradation; toluene => benzoate	350	Tyrosine metabolism
K00055	E1.1.1.90; aryl-alcohol dehydrogenase [EC:1.1.1.90]	ko00001	KEGG Orthology	M00538	Toluene degradation; toluene => benzoate	360	Phenylalanine metabolism
K00055	E1.1.1.90; aryl-alcohol dehydrogenase [EC:1.1.1.90]	ko00001	KEGG Orthology	M00538	Toluene degradation; toluene => benzoate	622	Xylene degradation
K00055	E1.1.1.90; aryl-alcohol dehydrogenase [EC:1.1.1.90]	ko00001	KEGG Orthology	M00538	Toluene degradation; toluene => benzoate	623	Toluene degradation
K00055	E1.1.1.90; aryl-alcohol dehydrogenase [EC:1.1.1.90]	ko00001	KEGG Orthology	M00538	Toluene degradation; toluene => benzoate	1100	Metabolic pathways
K00055	E1.1.1.90; aryl-alcohol dehydrogenase [EC:1.1.1.90]	ko00001	KEGG Orthology	M00538	Toluene degradation; toluene => benzoate	1120	Microbial metabolism in diverse environments
K00055	E1.1.1.90; aryl-alcohol dehydrogenase [EC:1.1.1.90]	ko00001	KEGG Orthology	M00538	Toluene degradation; toluene => benzoate	1220	Degradation of aromatic compounds
K00057	gpsA; glycerol-3-phosphate dehydrogenase [EC:1.1.1.94]	ko00001	KEGG Orthology	NA	NA	564	Glycerophospholipid metabolism
K00057	gpsA; glycerol-3-phosphate dehydrogenase [EC:1.1.1.94]	ko00001	KEGG Orthology	NA	NA	1110	Biosynthesis of secondary metabolites
K00058	serA, PHGDH; D-3-phosphoglycerate dehydrogenase / 2-oxoglutarate reductase [EC:1.1.1.95 1.1.1.399]	ko00001	KEGG Orthology	M00020	Serine biosynthesis; glycerate-3P => serine	260	Glycine; serine and threonine metabolism
K00058	serA, PHGDH; D-3-phosphoglycerate dehydrogenase / 2-oxoglutarate reductase [EC:1.1.1.95 1.1.1.399]	ko00001	KEGG Orthology	M00020	Serine biosynthesis; glycerate-3P => serine	270	Cysteine and methionine metabolism
K00058	serA, PHGDH; D-3-phosphoglycerate dehydrogenase / 2-oxoglutarate reductase [EC:1.1.1.95 1.1.1.399]	ko00001	KEGG Orthology	M00020	Serine biosynthesis; glycerate-3P => serine	680	Methane metabolism
K00058	serA, PHGDH; D-3-phosphoglycerate dehydrogenase / 2-oxoglutarate reductase [EC:1.1.1.95 1.1.1.399]	ko00001	KEGG Orthology	M00020	Serine biosynthesis; glycerate-3P => serine	1100	Metabolic pathways
K00058	serA, PHGDH; D-3-phosphoglycerate dehydrogenase / 2-oxoglutarate reductase [EC:1.1.1.95 1.1.1.399]	ko00001	KEGG Orthology	M00020	Serine biosynthesis; glycerate-3P => serine	1110	Biosynthesis of secondary metabolites
K00058	serA, PHGDH; D-3-phosphoglycerate dehydrogenase / 2-oxoglutarate reductase [EC:1.1.1.95 1.1.1.399]	ko00001	KEGG Orthology	M00020	Serine biosynthesis; glycerate-3P => serine	1120	Microbial metabolism in diverse environments
K00058	serA, PHGDH; D-3-phosphoglycerate dehydrogenase / 2-oxoglutarate reductase [EC:1.1.1.95 1.1.1.399]	ko00001	KEGG Orthology	M00020	Serine biosynthesis; glycerate-3P => serine	1200	Carbon metabolism
K00058	serA, PHGDH; D-3-phosphoglycerate dehydrogenase / 2-oxoglutarate reductase [EC:1.1.1.95 1.1.1.399]	ko00001	KEGG Orthology	M00020	Serine biosynthesis; glycerate-3P => serine	1230	Biosynthesis of amino acids
K00059	fabG, OAR1; 3-oxoacyl-[acyl-carrier protein] reductase [EC:1.1.1.100]	ko00001	KEGG Orthology	M00083	Fatty acid biosynthesis; elongation	61	Fatty acid biosynthesis
K00059	fabG, OAR1; 3-oxoacyl-[acyl-carrier protein] reductase [EC:1.1.1.100]	ko00001	KEGG Orthology	M00083	Fatty acid biosynthesis; elongation	333	Prodigiosin biosynthesis
K00059	fabG, OAR1; 3-oxoacyl-[acyl-carrier protein] reductase [EC:1.1.1.100]	ko00001	KEGG Orthology	M00083	Fatty acid biosynthesis; elongation	780	Biotin metabolism
K00059	fabG, OAR1; 3-oxoacyl-[acyl-carrier protein] reductase [EC:1.1.1.100]	ko00001	KEGG Orthology	M00083	Fatty acid biosynthesis; elongation	1100	Metabolic pathways
K00059	fabG, OAR1; 3-oxoacyl-[acyl-carrier protein] reductase [EC:1.1.1.100]	ko00001	KEGG Orthology	M00083	Fatty acid biosynthesis; elongation	1110	Biosynthesis of secondary metabolites
K00059	fabG, OAR1; 3-oxoacyl-[acyl-carrier protein] reductase [EC:1.1.1.100]	ko00001	KEGG Orthology	M00083	Fatty acid biosynthesis; elongation	1212	Fatty acid metabolism
K00059	fabG, OAR1; 3-oxoacyl-[acyl-carrier protein] reductase [EC:1.1.1.100]	ko00001	KEGG Orthology	M00083	Fatty acid biosynthesis; elongation	1240	Biosynthesis of cofactors
K00059	fabG, OAR1; 3-oxoacyl-[acyl-carrier protein] reductase [EC:1.1.1.100]	ko00001	KEGG Orthology	M00572	Pimeloyl-ACP biosynthesis; BioC-BioH pathway; malonyl-ACP => pimeloyl-ACP	61	Fatty acid biosynthesis
K00059	fabG, OAR1; 3-oxoacyl-[acyl-carrier protein] reductase [EC:1.1.1.100]	ko00001	KEGG Orthology	M00572	Pimeloyl-ACP biosynthesis; BioC-BioH pathway; malonyl-ACP => pimeloyl-ACP	333	Prodigiosin biosynthesis
K00059	fabG, OAR1; 3-oxoacyl-[acyl-carrier protein] reductase [EC:1.1.1.100]	ko00001	KEGG Orthology	M00572	Pimeloyl-ACP biosynthesis; BioC-BioH pathway; malonyl-ACP => pimeloyl-ACP	780	Biotin metabolism
K00059	fabG, OAR1; 3-oxoacyl-[acyl-carrier protein] reductase [EC:1.1.1.100]	ko00001	KEGG Orthology	M00572	Pimeloyl-ACP biosynthesis; BioC-BioH pathway; malonyl-ACP => pimeloyl-ACP	1100	Metabolic pathways
K00059	fabG, OAR1; 3-oxoacyl-[acyl-carrier protein] reductase [EC:1.1.1.100]	ko00001	KEGG Orthology	M00572	Pimeloyl-ACP biosynthesis; BioC-BioH pathway; malonyl-ACP => pimeloyl-ACP	1110	Biosynthesis of secondary metabolites
K00059	fabG, OAR1; 3-oxoacyl-[acyl-carrier protein] reductase [EC:1.1.1.100]	ko00001	KEGG Orthology	M00572	Pimeloyl-ACP biosynthesis; BioC-BioH pathway; malonyl-ACP => pimeloyl-ACP	1212	Fatty acid metabolism
K00059	fabG, OAR1; 3-oxoacyl-[acyl-carrier protein] reductase [EC:1.1.1.100]	ko00001	KEGG Orthology	M00572	Pimeloyl-ACP biosynthesis; BioC-BioH pathway; malonyl-ACP => pimeloyl-ACP	1240	Biosynthesis of cofactors
K00059	fabG, OAR1; 3-oxoacyl-[acyl-carrier protein] reductase [EC:1.1.1.100]	ko00001	KEGG Orthology	M00874	Fatty acid biosynthesis in mitochondria; fungi	61	Fatty acid biosynthesis
K00059	fabG, OAR1; 3-oxoacyl-[acyl-carrier protein] reductase [EC:1.1.1.100]	ko00001	KEGG Orthology	M00874	Fatty acid biosynthesis in mitochondria; fungi	333	Prodigiosin biosynthesis
K00059	fabG, OAR1; 3-oxoacyl-[acyl-carrier protein] reductase [EC:1.1.1.100]	ko00001	KEGG Orthology	M00874	Fatty acid biosynthesis in mitochondria; fungi	780	Biotin metabolism
K00059	fabG, OAR1; 3-oxoacyl-[acyl-carrier protein] reductase [EC:1.1.1.100]	ko00001	KEGG Orthology	M00874	Fatty acid biosynthesis in mitochondria; fungi	1100	Metabolic pathways
K00059	fabG, OAR1; 3-oxoacyl-[acyl-carrier protein] reductase [EC:1.1.1.100]	ko00001	KEGG Orthology	M00874	Fatty acid biosynthesis in mitochondria; fungi	1110	Biosynthesis of secondary metabolites
K00059	fabG, OAR1; 3-oxoacyl-[acyl-carrier protein] reductase [EC:1.1.1.100]	ko00001	KEGG Orthology	M00874	Fatty acid biosynthesis in mitochondria; fungi	1212	Fatty acid metabolism
K00059	fabG, OAR1; 3-oxoacyl-[acyl-carrier protein] reductase [EC:1.1.1.100]	ko00001	KEGG Orthology	M00874	Fatty acid biosynthesis in mitochondria; fungi	1240	Biosynthesis of cofactors
K00060	tdh; threonine 3-dehydrogenase [EC:1.1.1.103]	ko00001	KEGG Orthology	NA	NA	260	Glycine; serine and threonine metabolism
K00060	tdh; threonine 3-dehydrogenase [EC:1.1.1.103]	ko00001	KEGG Orthology	NA	NA	1100	Metabolic pathways
K00065	kduD; 2-dehydro-3-deoxy-D-gluconate 5-dehydrogenase [EC:1.1.1.127]	ko00001	KEGG Orthology	NA	NA	40	Pentose and glucuronate interconversions
K00065	kduD; 2-dehydro-3-deoxy-D-gluconate 5-dehydrogenase [EC:1.1.1.127]	ko00001	KEGG Orthology	NA	NA	1100	Metabolic pathways
K00066	algD; GDP-mannose 6-dehydrogenase [EC:1.1.1.132]	ko00001	KEGG Orthology	NA	NA	51	Fructose and mannose metabolism
K00066	algD; GDP-mannose 6-dehydrogenase [EC:1.1.1.132]	ko00001	KEGG Orthology	NA	NA	520	Amino sugar and nucleotide sugar metabolism
K00066	algD; GDP-mannose 6-dehydrogenase [EC:1.1.1.132]	ko00001	KEGG Orthology	NA	NA	1100	Metabolic pathways
K00066	algD; GDP-mannose 6-dehydrogenase [EC:1.1.1.132]	ko00001	KEGG Orthology	NA	NA	1250	Biosynthesis of nucleotide sugars
K00066	algD; GDP-mannose 6-dehydrogenase [EC:1.1.1.132]	ko00001	KEGG Orthology	NA	NA	2020	Two-component system
K00067	rfbD, rmlD; dTDP-4-dehydrorhamnose reductase [EC:1.1.1.133]	ko00001	KEGG Orthology	M00793	dTDP-L-rhamnose biosynthesis	521	Streptomycin biosynthesis
K00067	rfbD, rmlD; dTDP-4-dehydrorhamnose reductase [EC:1.1.1.133]	ko00001	KEGG Orthology	M00793	dTDP-L-rhamnose biosynthesis	523	Polyketide sugar unit biosynthesis
K00067	rfbD, rmlD; dTDP-4-dehydrorhamnose reductase [EC:1.1.1.133]	ko00001	KEGG Orthology	M00793	dTDP-L-rhamnose biosynthesis	541	O-Antigen nucleotide sugar biosynthesis
K00067	rfbD, rmlD; dTDP-4-dehydrorhamnose reductase [EC:1.1.1.133]	ko00001	KEGG Orthology	M00793	dTDP-L-rhamnose biosynthesis	1100	Metabolic pathways
K00067	rfbD, rmlD; dTDP-4-dehydrorhamnose reductase [EC:1.1.1.133]	ko00001	KEGG Orthology	M00793	dTDP-L-rhamnose biosynthesis	1110	Biosynthesis of secondary metabolites
K00067	rfbD, rmlD; dTDP-4-dehydrorhamnose reductase [EC:1.1.1.133]	ko00001	KEGG Orthology	M00793	dTDP-L-rhamnose biosynthesis	1250	Biosynthesis of nucleotide sugars
K00068	srlD; sorbitol-6-phosphate 2-dehydrogenase [EC:1.1.1.140]	ko00001	KEGG Orthology	NA	NA	51	Fructose and mannose metabolism
K00068	srlD; sorbitol-6-phosphate 2-dehydrogenase [EC:1.1.1.140]	ko00001	KEGG Orthology	NA	NA	1100	Metabolic pathways
K00073	allD; ureidoglycolate dehydrogenase [EC:1.1.1.350]	ko00001	KEGG Orthology	NA	NA	230	Purine metabolism
K00073	allD; ureidoglycolate dehydrogenase [EC:1.1.1.350]	ko00001	KEGG Orthology	NA	NA	1100	Metabolic pathways
K00073	allD; ureidoglycolate dehydrogenase [EC:1.1.1.350]	ko00001	KEGG Orthology	NA	NA	1120	Microbial metabolism in diverse environments
K00074	paaH, hbd, fadB, mmgB; 3-hydroxybutyryl-CoA dehydrogenase [EC:1.1.1.157]	ko00001	KEGG Orthology	M00878	Phenylacetate degradation; phenylaxetate => acetyl-CoA_succinyl-CoA	360	Phenylalanine metabolism
K00074	paaH, hbd, fadB, mmgB; 3-hydroxybutyryl-CoA dehydrogenase [EC:1.1.1.157]	ko00001	KEGG Orthology	M00878	Phenylacetate degradation; phenylaxetate => acetyl-CoA_succinyl-CoA	362	Benzoate degradation
K00074	paaH, hbd, fadB, mmgB; 3-hydroxybutyryl-CoA dehydrogenase [EC:1.1.1.157]	ko00001	KEGG Orthology	M00878	Phenylacetate degradation; phenylaxetate => acetyl-CoA_succinyl-CoA	650	Butanoate metabolism
K00074	paaH, hbd, fadB, mmgB; 3-hydroxybutyryl-CoA dehydrogenase [EC:1.1.1.157]	ko00001	KEGG Orthology	M00878	Phenylacetate degradation; phenylaxetate => acetyl-CoA_succinyl-CoA	1100	Metabolic pathways
K00074	paaH, hbd, fadB, mmgB; 3-hydroxybutyryl-CoA dehydrogenase [EC:1.1.1.157]	ko00001	KEGG Orthology	M00878	Phenylacetate degradation; phenylaxetate => acetyl-CoA_succinyl-CoA	1120	Microbial metabolism in diverse environments
K00074	paaH, hbd, fadB, mmgB; 3-hydroxybutyryl-CoA dehydrogenase [EC:1.1.1.157]	ko00001	KEGG Orthology	M00878	Phenylacetate degradation; phenylaxetate => acetyl-CoA_succinyl-CoA	1200	Carbon metabolism
K00075	murB; UDP-N-acetylmuramate dehydrogenase [EC:1.3.1.98]	ko00001	KEGG Orthology	NA	NA	520	Amino sugar and nucleotide sugar metabolism
K00075	murB; UDP-N-acetylmuramate dehydrogenase [EC:1.3.1.98]	ko00001	KEGG Orthology	NA	NA	550	Peptidoglycan biosynthesis
K00075	murB; UDP-N-acetylmuramate dehydrogenase [EC:1.3.1.98]	ko00001	KEGG Orthology	NA	NA	1100	Metabolic pathways
K00075	murB; UDP-N-acetylmuramate dehydrogenase [EC:1.3.1.98]	ko00001	KEGG Orthology	NA	NA	1250	Biosynthesis of nucleotide sugars
K00076	hdhA; 7-alpha-hydroxysteroid dehydrogenase [EC:1.1.1.159]	ko00001	KEGG Orthology	NA	NA	121	Secondary bile acid biosynthesis
K00077	panE, apbA; 2-dehydropantoate 2-reductase [EC:1.1.1.169]	ko00001	KEGG Orthology	M00119	Pantothenate biosynthesis; valine_L-aspartate => pantothenate	770	Pantothenate and CoA biosynthesis
K00077	panE, apbA; 2-dehydropantoate 2-reductase [EC:1.1.1.169]	ko00001	KEGG Orthology	M00119	Pantothenate biosynthesis; valine_L-aspartate => pantothenate	1100	Metabolic pathways
K00077	panE, apbA; 2-dehydropantoate 2-reductase [EC:1.1.1.169]	ko00001	KEGG Orthology	M00119	Pantothenate biosynthesis; valine_L-aspartate => pantothenate	1110	Biosynthesis of secondary metabolites
K00077	panE, apbA; 2-dehydropantoate 2-reductase [EC:1.1.1.169]	ko00001	KEGG Orthology	M00119	Pantothenate biosynthesis; valine_L-aspartate => pantothenate	1240	Biosynthesis of cofactors
K00077	panE, apbA; 2-dehydropantoate 2-reductase [EC:1.1.1.169]	ko00001	KEGG Orthology	M00913	Pantothenate biosynthesis; 2-oxoisovalerate_spermine => pantothenate	770	Pantothenate and CoA biosynthesis
K00077	panE, apbA; 2-dehydropantoate 2-reductase [EC:1.1.1.169]	ko00001	KEGG Orthology	M00913	Pantothenate biosynthesis; 2-oxoisovalerate_spermine => pantothenate	1100	Metabolic pathways
K00077	panE, apbA; 2-dehydropantoate 2-reductase [EC:1.1.1.169]	ko00001	KEGG Orthology	M00913	Pantothenate biosynthesis; 2-oxoisovalerate_spermine => pantothenate	1110	Biosynthesis of secondary metabolites
K00077	panE, apbA; 2-dehydropantoate 2-reductase [EC:1.1.1.169]	ko00001	KEGG Orthology	M00913	Pantothenate biosynthesis; 2-oxoisovalerate_spermine => pantothenate	1240	Biosynthesis of cofactors
K00077	panE, apbA; 2-dehydropantoate 2-reductase [EC:1.1.1.169]	ko00001	KEGG Orthology	M00914	Coenzyme A biosynthesis; archaea; 2-oxoisovalerate => 4-phosphopantoate => CoA	770	Pantothenate and CoA biosynthesis
K00077	panE, apbA; 2-dehydropantoate 2-reductase [EC:1.1.1.169]	ko00001	KEGG Orthology	M00914	Coenzyme A biosynthesis; archaea; 2-oxoisovalerate => 4-phosphopantoate => CoA	1100	Metabolic pathways
K00077	panE, apbA; 2-dehydropantoate 2-reductase [EC:1.1.1.169]	ko00001	KEGG Orthology	M00914	Coenzyme A biosynthesis; archaea; 2-oxoisovalerate => 4-phosphopantoate => CoA	1110	Biosynthesis of secondary metabolites
K00077	panE, apbA; 2-dehydropantoate 2-reductase [EC:1.1.1.169]	ko00001	KEGG Orthology	M00914	Coenzyme A biosynthesis; archaea; 2-oxoisovalerate => 4-phosphopantoate => CoA	1240	Biosynthesis of cofactors
K00087	ygeS, xdhA; xanthine dehydrogenase molybdenum-binding subunit [EC:1.17.1.4]	ko00001	KEGG Orthology	M00546	Purine degradation; xanthine => urea	230	Purine metabolism
K00087	ygeS, xdhA; xanthine dehydrogenase molybdenum-binding subunit [EC:1.17.1.4]	ko00001	KEGG Orthology	M00546	Purine degradation; xanthine => urea	1100	Metabolic pathways
K00087	ygeS, xdhA; xanthine dehydrogenase molybdenum-binding subunit [EC:1.17.1.4]	ko00001	KEGG Orthology	M00546	Purine degradation; xanthine => urea	1120	Microbial metabolism in diverse environments
K00087	ygeS, xdhA; xanthine dehydrogenase molybdenum-binding subunit [EC:1.17.1.4]	ko00001	KEGG Orthology	M00546	Purine degradation; xanthine => urea	1232	Nucleotide metabolism
K00087	ygeS, xdhA; xanthine dehydrogenase molybdenum-binding subunit [EC:1.17.1.4]	ko00001	KEGG Orthology	M00958	Adenine ribonucleotide degradation; AMP => Urate	230	Purine metabolism
K00087	ygeS, xdhA; xanthine dehydrogenase molybdenum-binding subunit [EC:1.17.1.4]	ko00001	KEGG Orthology	M00958	Adenine ribonucleotide degradation; AMP => Urate	1100	Metabolic pathways
K00087	ygeS, xdhA; xanthine dehydrogenase molybdenum-binding subunit [EC:1.17.1.4]	ko00001	KEGG Orthology	M00958	Adenine ribonucleotide degradation; AMP => Urate	1120	Microbial metabolism in diverse environments
K00087	ygeS, xdhA; xanthine dehydrogenase molybdenum-binding subunit [EC:1.17.1.4]	ko00001	KEGG Orthology	M00958	Adenine ribonucleotide degradation; AMP => Urate	1232	Nucleotide metabolism
K00087	ygeS, xdhA; xanthine dehydrogenase molybdenum-binding subunit [EC:1.17.1.4]	ko00001	KEGG Orthology	M00959	Guanine ribonucleotide degradation; GMP => Urate	230	Purine metabolism
K00087	ygeS, xdhA; xanthine dehydrogenase molybdenum-binding subunit [EC:1.17.1.4]	ko00001	KEGG Orthology	M00959	Guanine ribonucleotide degradation; GMP => Urate	1100	Metabolic pathways
K00087	ygeS, xdhA; xanthine dehydrogenase molybdenum-binding subunit [EC:1.17.1.4]	ko00001	KEGG Orthology	M00959	Guanine ribonucleotide degradation; GMP => Urate	1120	Microbial metabolism in diverse environments
K00087	ygeS, xdhA; xanthine dehydrogenase molybdenum-binding subunit [EC:1.17.1.4]	ko00001	KEGG Orthology	M00959	Guanine ribonucleotide degradation; GMP => Urate	1232	Nucleotide metabolism
K00088	IMPDH, guaB; IMP dehydrogenase [EC:1.1.1.205]	ko00001	KEGG Orthology	M00050	Guanine ribonucleotide biosynthesis; IMP => GDP;GTP	230	Purine metabolism
K00088	IMPDH, guaB; IMP dehydrogenase [EC:1.1.1.205]	ko00001	KEGG Orthology	M00050	Guanine ribonucleotide biosynthesis; IMP => GDP;GTP	983	Drug metabolism - other enzymes
K00088	IMPDH, guaB; IMP dehydrogenase [EC:1.1.1.205]	ko00001	KEGG Orthology	M00050	Guanine ribonucleotide biosynthesis; IMP => GDP;GTP	1100	Metabolic pathways
K00088	IMPDH, guaB; IMP dehydrogenase [EC:1.1.1.205]	ko00001	KEGG Orthology	M00050	Guanine ribonucleotide biosynthesis; IMP => GDP;GTP	1110	Biosynthesis of secondary metabolites
K00088	IMPDH, guaB; IMP dehydrogenase [EC:1.1.1.205]	ko00001	KEGG Orthology	M00050	Guanine ribonucleotide biosynthesis; IMP => GDP;GTP	1232	Nucleotide metabolism
K00090	ghrB; glyoxylate/hydroxypyruvate/2-ketogluconate reductase [EC:1.1.1.79 1.1.1.81 1.1.1.215]	ko00001	KEGG Orthology	NA	NA	30	Pentose phosphate pathway
K00090	ghrB; glyoxylate/hydroxypyruvate/2-ketogluconate reductase [EC:1.1.1.79 1.1.1.81 1.1.1.215]	ko00001	KEGG Orthology	NA	NA	260	Glycine; serine and threonine metabolism
K00090	ghrB; glyoxylate/hydroxypyruvate/2-ketogluconate reductase [EC:1.1.1.79 1.1.1.81 1.1.1.215]	ko00001	KEGG Orthology	NA	NA	620	Pyruvate metabolism
K00090	ghrB; glyoxylate/hydroxypyruvate/2-ketogluconate reductase [EC:1.1.1.79 1.1.1.81 1.1.1.215]	ko00001	KEGG Orthology	NA	NA	630	Glyoxylate and dicarboxylate metabolism
K00090	ghrB; glyoxylate/hydroxypyruvate/2-ketogluconate reductase [EC:1.1.1.79 1.1.1.81 1.1.1.215]	ko00001	KEGG Orthology	NA	NA	1100	Metabolic pathways
K00090	ghrB; glyoxylate/hydroxypyruvate/2-ketogluconate reductase [EC:1.1.1.79 1.1.1.81 1.1.1.215]	ko00001	KEGG Orthology	NA	NA	1110	Biosynthesis of secondary metabolites
K00090	ghrB; glyoxylate/hydroxypyruvate/2-ketogluconate reductase [EC:1.1.1.79 1.1.1.81 1.1.1.215]	ko00001	KEGG Orthology	NA	NA	1120	Microbial metabolism in diverse environments
K00096	araM, egsA; glycerol-1-phosphate dehydrogenase [NAD+] [EC:1.1.1.261]	ko00001	KEGG Orthology	NA	NA	564	Glycerophospholipid metabolism
K00096	araM, egsA; glycerol-1-phosphate dehydrogenase [NAD+] [EC:1.1.1.261]	ko00001	KEGG Orthology	NA	NA	1110	Biosynthesis of secondary metabolites
K00097	pdxA; 4-hydroxythreonine-4-phosphate dehydrogenase [EC:1.1.1.262]	ko00001	KEGG Orthology	M00124	Pyridoxal-P biosynthesis; erythrose-4P => pyridoxal-P	750	Vitamin B6 metabolism
K00097	pdxA; 4-hydroxythreonine-4-phosphate dehydrogenase [EC:1.1.1.262]	ko00001	KEGG Orthology	M00124	Pyridoxal-P biosynthesis; erythrose-4P => pyridoxal-P	1100	Metabolic pathways
K00097	pdxA; 4-hydroxythreonine-4-phosphate dehydrogenase [EC:1.1.1.262]	ko00001	KEGG Orthology	M00124	Pyridoxal-P biosynthesis; erythrose-4P => pyridoxal-P	1240	Biosynthesis of cofactors
K00098	idnD; L-idonate 5-dehydrogenase [EC:1.1.1.264]	ko00001	KEGG Orthology	NA	NA	NA	NA
K00099	dxr; 1-deoxy-D-xylulose-5-phosphate reductoisomerase [EC:1.1.1.267]	ko00001	KEGG Orthology	M00096	C5 isoprenoid biosynthesis; non-mevalonate pathway	900	Terpenoid backbone biosynthesis
K00099	dxr; 1-deoxy-D-xylulose-5-phosphate reductoisomerase [EC:1.1.1.267]	ko00001	KEGG Orthology	M00096	C5 isoprenoid biosynthesis; non-mevalonate pathway	1100	Metabolic pathways
K00099	dxr; 1-deoxy-D-xylulose-5-phosphate reductoisomerase [EC:1.1.1.267]	ko00001	KEGG Orthology	M00096	C5 isoprenoid biosynthesis; non-mevalonate pathway	1110	Biosynthesis of secondary metabolites
K00100	bdhAB; butanol dehydrogenase [EC:1.1.1.-]	ko00001	KEGG Orthology	NA	NA	650	Butanoate metabolism
K00100	bdhAB; butanol dehydrogenase [EC:1.1.1.-]	ko00001	KEGG Orthology	NA	NA	1100	Metabolic pathways
K00100	bdhAB; butanol dehydrogenase [EC:1.1.1.-]	ko00001	KEGG Orthology	NA	NA	1120	Microbial metabolism in diverse environments
K00101	lldD; L-lactate dehydrogenase [EC:1.1.2.3]	ko00001	KEGG Orthology	NA	NA	620	Pyruvate metabolism
K00101	lldD; L-lactate dehydrogenase [EC:1.1.2.3]	ko00001	KEGG Orthology	NA	NA	1100	Metabolic pathways
K00102	LDHD, dld; D-lactate dehydrogenase [EC:1.1.2.4]	ko00001	KEGG Orthology	NA	NA	620	Pyruvate metabolism
K00102	LDHD, dld; D-lactate dehydrogenase [EC:1.1.2.4]	ko00001	KEGG Orthology	NA	NA	1100	Metabolic pathways
K00103	GULO; L-gulonolactone oxidase [EC:1.1.3.8]	ko00001	KEGG Orthology	M00129	Ascorbate biosynthesis; animals; glucose-1P => ascorbate	53	Ascorbate and aldarate metabolism
K00103	GULO; L-gulonolactone oxidase [EC:1.1.3.8]	ko00001	KEGG Orthology	M00129	Ascorbate biosynthesis; animals; glucose-1P => ascorbate	1100	Metabolic pathways
K00103	GULO; L-gulonolactone oxidase [EC:1.1.3.8]	ko00001	KEGG Orthology	M00129	Ascorbate biosynthesis; animals; glucose-1P => ascorbate	1240	Biosynthesis of cofactors
K00104	glcD; glycolate dehydrogenase FAD-linked subunit [EC:1.1.99.14]	ko00001	KEGG Orthology	NA	NA	630	Glyoxylate and dicarboxylate metabolism
K00104	glcD; glycolate dehydrogenase FAD-linked subunit [EC:1.1.99.14]	ko00001	KEGG Orthology	NA	NA	1100	Metabolic pathways
K00104	glcD; glycolate dehydrogenase FAD-linked subunit [EC:1.1.99.14]	ko00001	KEGG Orthology	NA	NA	1110	Biosynthesis of secondary metabolites
K00104	glcD; glycolate dehydrogenase FAD-linked subunit [EC:1.1.99.14]	ko00001	KEGG Orthology	NA	NA	1120	Microbial metabolism in diverse environments
K00105	E1.1.3.21; alpha-glycerophosphate oxidase [EC:1.1.3.21]	ko00001	KEGG Orthology	NA	NA	564	Glycerophospholipid metabolism
K00105	E1.1.3.21; alpha-glycerophosphate oxidase [EC:1.1.3.21]	ko00001	KEGG Orthology	NA	NA	1110	Biosynthesis of secondary metabolites
K00108	betA, CHDH; choline dehydrogenase [EC:1.1.99.1]	ko00001	KEGG Orthology	M00555	Betaine biosynthesis; choline => betaine	260	Glycine; serine and threonine metabolism
K00108	betA, CHDH; choline dehydrogenase [EC:1.1.99.1]	ko00001	KEGG Orthology	M00555	Betaine biosynthesis; choline => betaine	1100	Metabolic pathways
K00111	glpA, glpD; glycerol-3-phosphate dehydrogenase [EC:1.1.5.3]	ko00001	KEGG Orthology	NA	NA	564	Glycerophospholipid metabolism
K00111	glpA, glpD; glycerol-3-phosphate dehydrogenase [EC:1.1.5.3]	ko00001	KEGG Orthology	NA	NA	1110	Biosynthesis of secondary metabolites
K00112	glpB; glycerol-3-phosphate dehydrogenase subunit B [EC:1.1.5.3]	ko00001	KEGG Orthology	NA	NA	564	Glycerophospholipid metabolism
K00112	glpB; glycerol-3-phosphate dehydrogenase subunit B [EC:1.1.5.3]	ko00001	KEGG Orthology	NA	NA	1110	Biosynthesis of secondary metabolites
K00113	glpC; glycerol-3-phosphate dehydrogenase subunit C	ko00001	KEGG Orthology	NA	NA	564	Glycerophospholipid metabolism
K00113	glpC; glycerol-3-phosphate dehydrogenase subunit C	ko00001	KEGG Orthology	NA	NA	1110	Biosynthesis of secondary metabolites
K00116	mqo; malate dehydrogenase [EC:1.1.5.4]	ko00001	KEGG Orthology	M00009	Citrate cycle	20	Citrate cycle
K00116	mqo; malate dehydrogenase [EC:1.1.5.4]	ko00001	KEGG Orthology	M00009	Citrate cycle	620	Pyruvate metabolism
K00116	mqo; malate dehydrogenase [EC:1.1.5.4]	ko00001	KEGG Orthology	M00009	Citrate cycle	1100	Metabolic pathways
K00116	mqo; malate dehydrogenase [EC:1.1.5.4]	ko00001	KEGG Orthology	M00009	Citrate cycle	1110	Biosynthesis of secondary metabolites
K00116	mqo; malate dehydrogenase [EC:1.1.5.4]	ko00001	KEGG Orthology	M00009	Citrate cycle	1120	Microbial metabolism in diverse environments
K00116	mqo; malate dehydrogenase [EC:1.1.5.4]	ko00001	KEGG Orthology	M00009	Citrate cycle	1200	Carbon metabolism
K00116	mqo; malate dehydrogenase [EC:1.1.5.4]	ko00001	KEGG Orthology	M00011	Citrate cycle; second carbon oxidation; 2-oxoglutarate => oxaloacetate	20	Citrate cycle
K00116	mqo; malate dehydrogenase [EC:1.1.5.4]	ko00001	KEGG Orthology	M00011	Citrate cycle; second carbon oxidation; 2-oxoglutarate => oxaloacetate	620	Pyruvate metabolism
K00116	mqo; malate dehydrogenase [EC:1.1.5.4]	ko00001	KEGG Orthology	M00011	Citrate cycle; second carbon oxidation; 2-oxoglutarate => oxaloacetate	1100	Metabolic pathways
K00116	mqo; malate dehydrogenase [EC:1.1.5.4]	ko00001	KEGG Orthology	M00011	Citrate cycle; second carbon oxidation; 2-oxoglutarate => oxaloacetate	1110	Biosynthesis of secondary metabolites
K00116	mqo; malate dehydrogenase [EC:1.1.5.4]	ko00001	KEGG Orthology	M00011	Citrate cycle; second carbon oxidation; 2-oxoglutarate => oxaloacetate	1120	Microbial metabolism in diverse environments
K00116	mqo; malate dehydrogenase [EC:1.1.5.4]	ko00001	KEGG Orthology	M00011	Citrate cycle; second carbon oxidation; 2-oxoglutarate => oxaloacetate	1200	Carbon metabolism
K00117	gcd; quinoprotein glucose dehydrogenase [EC:1.1.5.2]	ko00001	KEGG Orthology	NA	NA	30	Pentose phosphate pathway
K00117	gcd; quinoprotein glucose dehydrogenase [EC:1.1.5.2]	ko00001	KEGG Orthology	NA	NA	1100	Metabolic pathways
K00117	gcd; quinoprotein glucose dehydrogenase [EC:1.1.5.2]	ko00001	KEGG Orthology	NA	NA	1110	Biosynthesis of secondary metabolites
K00121	frmA, ADH5, adhC; S-glutathione dehydrogenase / alcohol dehydrogenase [EC:1.1.1.284 1.1.1.1]	ko00001	KEGG Orthology	NA	NA	10	Glycolysis _ Gluconeogenesis
K00121	frmA, ADH5, adhC; S-glutathione dehydrogenase / alcohol dehydrogenase [EC:1.1.1.284 1.1.1.1]	ko00001	KEGG Orthology	NA	NA	71	Fatty acid degradation
K00121	frmA, ADH5, adhC; S-glutathione dehydrogenase / alcohol dehydrogenase [EC:1.1.1.284 1.1.1.1]	ko00001	KEGG Orthology	NA	NA	350	Tyrosine metabolism
K00121	frmA, ADH5, adhC; S-glutathione dehydrogenase / alcohol dehydrogenase [EC:1.1.1.284 1.1.1.1]	ko00001	KEGG Orthology	NA	NA	620	Pyruvate metabolism
K00121	frmA, ADH5, adhC; S-glutathione dehydrogenase / alcohol dehydrogenase [EC:1.1.1.284 1.1.1.1]	ko00001	KEGG Orthology	NA	NA	625	Chloroalkane and chloroalkene degradation
K00121	frmA, ADH5, adhC; S-glutathione dehydrogenase / alcohol dehydrogenase [EC:1.1.1.284 1.1.1.1]	ko00001	KEGG Orthology	NA	NA	626	Naphthalene degradation
K00121	frmA, ADH5, adhC; S-glutathione dehydrogenase / alcohol dehydrogenase [EC:1.1.1.284 1.1.1.1]	ko00001	KEGG Orthology	NA	NA	680	Methane metabolism
K00121	frmA, ADH5, adhC; S-glutathione dehydrogenase / alcohol dehydrogenase [EC:1.1.1.284 1.1.1.1]	ko00001	KEGG Orthology	NA	NA	830	Retinol metabolism
K00121	frmA, ADH5, adhC; S-glutathione dehydrogenase / alcohol dehydrogenase [EC:1.1.1.284 1.1.1.1]	ko00001	KEGG Orthology	NA	NA	980	Metabolism of xenobiotics by cytochrome P450
K00121	frmA, ADH5, adhC; S-glutathione dehydrogenase / alcohol dehydrogenase [EC:1.1.1.284 1.1.1.1]	ko00001	KEGG Orthology	NA	NA	982	Drug metabolism - cytochrome P450
K00121	frmA, ADH5, adhC; S-glutathione dehydrogenase / alcohol dehydrogenase [EC:1.1.1.284 1.1.1.1]	ko00001	KEGG Orthology	NA	NA	1100	Metabolic pathways
K00121	frmA, ADH5, adhC; S-glutathione dehydrogenase / alcohol dehydrogenase [EC:1.1.1.284 1.1.1.1]	ko00001	KEGG Orthology	NA	NA	1110	Biosynthesis of secondary metabolites
K00121	frmA, ADH5, adhC; S-glutathione dehydrogenase / alcohol dehydrogenase [EC:1.1.1.284 1.1.1.1]	ko00001	KEGG Orthology	NA	NA	1120	Microbial metabolism in diverse environments
K00121	frmA, ADH5, adhC; S-glutathione dehydrogenase / alcohol dehydrogenase [EC:1.1.1.284 1.1.1.1]	ko00001	KEGG Orthology	NA	NA	1200	Carbon metabolism
K00121	frmA, ADH5, adhC; S-glutathione dehydrogenase / alcohol dehydrogenase [EC:1.1.1.284 1.1.1.1]	ko00001	KEGG Orthology	NA	NA	1220	Degradation of aromatic compounds
K00121	frmA, ADH5, adhC; S-glutathione dehydrogenase / alcohol dehydrogenase [EC:1.1.1.284 1.1.1.1]	ko00001	KEGG Orthology	NA	NA	4936	Alcoholic liver disease
K00123	fdoG, fdhF, fdwA; formate dehydrogenase major subunit [EC:1.17.1.9]	ko00001	KEGG Orthology	NA	NA	630	Glyoxylate and dicarboxylate metabolism
K00123	fdoG, fdhF, fdwA; formate dehydrogenase major subunit [EC:1.17.1.9]	ko00001	KEGG Orthology	NA	NA	680	Methane metabolism
K00123	fdoG, fdhF, fdwA; formate dehydrogenase major subunit [EC:1.17.1.9]	ko00001	KEGG Orthology	NA	NA	1100	Metabolic pathways
K00123	fdoG, fdhF, fdwA; formate dehydrogenase major subunit [EC:1.17.1.9]	ko00001	KEGG Orthology	NA	NA	1120	Microbial metabolism in diverse environments
K00123	fdoG, fdhF, fdwA; formate dehydrogenase major subunit [EC:1.17.1.9]	ko00001	KEGG Orthology	NA	NA	1200	Carbon metabolism
K00124	fdoH, fdsB; formate dehydrogenase iron-sulfur subunit	ko00001	KEGG Orthology	NA	NA	630	Glyoxylate and dicarboxylate metabolism
K00124	fdoH, fdsB; formate dehydrogenase iron-sulfur subunit	ko00001	KEGG Orthology	NA	NA	680	Methane metabolism
K00124	fdoH, fdsB; formate dehydrogenase iron-sulfur subunit	ko00001	KEGG Orthology	NA	NA	1100	Metabolic pathways
K00124	fdoH, fdsB; formate dehydrogenase iron-sulfur subunit	ko00001	KEGG Orthology	NA	NA	1120	Microbial metabolism in diverse environments
K00124	fdoH, fdsB; formate dehydrogenase iron-sulfur subunit	ko00001	KEGG Orthology	NA	NA	1200	Carbon metabolism
K00125	fdhB; formate dehydrogenase beta subunit [EC:1.17.98.3 1.8.98.6]	ko00001	KEGG Orthology	M00356	Methanogenesis; methanol => methane	680	Methane metabolism
K00125	fdhB; formate dehydrogenase beta subunit [EC:1.17.98.3 1.8.98.6]	ko00001	KEGG Orthology	M00356	Methanogenesis; methanol => methane	1100	Metabolic pathways
K00125	fdhB; formate dehydrogenase beta subunit [EC:1.17.98.3 1.8.98.6]	ko00001	KEGG Orthology	M00356	Methanogenesis; methanol => methane	1120	Microbial metabolism in diverse environments
K00125	fdhB; formate dehydrogenase beta subunit [EC:1.17.98.3 1.8.98.6]	ko00001	KEGG Orthology	M00356	Methanogenesis; methanol => methane	1200	Carbon metabolism
K00125	fdhB; formate dehydrogenase beta subunit [EC:1.17.98.3 1.8.98.6]	ko00001	KEGG Orthology	M00357	Methanogenesis; acetate => methane	680	Methane metabolism
K00125	fdhB; formate dehydrogenase beta subunit [EC:1.17.98.3 1.8.98.6]	ko00001	KEGG Orthology	M00357	Methanogenesis; acetate => methane	1100	Metabolic pathways
K00125	fdhB; formate dehydrogenase beta subunit [EC:1.17.98.3 1.8.98.6]	ko00001	KEGG Orthology	M00357	Methanogenesis; acetate => methane	1120	Microbial metabolism in diverse environments
K00125	fdhB; formate dehydrogenase beta subunit [EC:1.17.98.3 1.8.98.6]	ko00001	KEGG Orthology	M00357	Methanogenesis; acetate => methane	1200	Carbon metabolism
K00125	fdhB; formate dehydrogenase beta subunit [EC:1.17.98.3 1.8.98.6]	ko00001	KEGG Orthology	M00563	Methanogenesis; methylamine_dimethylamine_trimethylamine => methane	680	Methane metabolism
K00125	fdhB; formate dehydrogenase beta subunit [EC:1.17.98.3 1.8.98.6]	ko00001	KEGG Orthology	M00563	Methanogenesis; methylamine_dimethylamine_trimethylamine => methane	1100	Metabolic pathways
K00125	fdhB; formate dehydrogenase beta subunit [EC:1.17.98.3 1.8.98.6]	ko00001	KEGG Orthology	M00563	Methanogenesis; methylamine_dimethylamine_trimethylamine => methane	1120	Microbial metabolism in diverse environments
K00125	fdhB; formate dehydrogenase beta subunit [EC:1.17.98.3 1.8.98.6]	ko00001	KEGG Orthology	M00563	Methanogenesis; methylamine_dimethylamine_trimethylamine => methane	1200	Carbon metabolism
K00125	fdhB; formate dehydrogenase beta subunit [EC:1.17.98.3 1.8.98.6]	ko00001	KEGG Orthology	M00567	Methanogenesis; CO2 => methane	680	Methane metabolism
K00125	fdhB; formate dehydrogenase beta subunit [EC:1.17.98.3 1.8.98.6]	ko00001	KEGG Orthology	M00567	Methanogenesis; CO2 => methane	1100	Metabolic pathways
K00125	fdhB; formate dehydrogenase beta subunit [EC:1.17.98.3 1.8.98.6]	ko00001	KEGG Orthology	M00567	Methanogenesis; CO2 => methane	1120	Microbial metabolism in diverse environments
K00125	fdhB; formate dehydrogenase beta subunit [EC:1.17.98.3 1.8.98.6]	ko00001	KEGG Orthology	M00567	Methanogenesis; CO2 => methane	1200	Carbon metabolism
K00127	fdoI, fdsG; formate dehydrogenase subunit gamma	ko00001	KEGG Orthology	NA	NA	630	Glyoxylate and dicarboxylate metabolism
K00127	fdoI, fdsG; formate dehydrogenase subunit gamma	ko00001	KEGG Orthology	NA	NA	680	Methane metabolism
K00127	fdoI, fdsG; formate dehydrogenase subunit gamma	ko00001	KEGG Orthology	NA	NA	1100	Metabolic pathways
K00127	fdoI, fdsG; formate dehydrogenase subunit gamma	ko00001	KEGG Orthology	NA	NA	1120	Microbial metabolism in diverse environments
K00127	fdoI, fdsG; formate dehydrogenase subunit gamma	ko00001	KEGG Orthology	NA	NA	1200	Carbon metabolism
K00128	ALDH; aldehyde dehydrogenase [EC:1.2.1.3]	ko00001	KEGG Orthology	M00135	GABA biosynthesis; eukaryotes; putrescine => GABA	10	Glycolysis _ Gluconeogenesis
K00128	ALDH; aldehyde dehydrogenase [EC:1.2.1.3]	ko00001	KEGG Orthology	M00135	GABA biosynthesis; eukaryotes; putrescine => GABA	53	Ascorbate and aldarate metabolism
K00128	ALDH; aldehyde dehydrogenase [EC:1.2.1.3]	ko00001	KEGG Orthology	M00135	GABA biosynthesis; eukaryotes; putrescine => GABA	71	Fatty acid degradation
K00128	ALDH; aldehyde dehydrogenase [EC:1.2.1.3]	ko00001	KEGG Orthology	M00135	GABA biosynthesis; eukaryotes; putrescine => GABA	280	Valine; leucine and isoleucine degradation
K00128	ALDH; aldehyde dehydrogenase [EC:1.2.1.3]	ko00001	KEGG Orthology	M00135	GABA biosynthesis; eukaryotes; putrescine => GABA	310	Lysine degradation
K00128	ALDH; aldehyde dehydrogenase [EC:1.2.1.3]	ko00001	KEGG Orthology	M00135	GABA biosynthesis; eukaryotes; putrescine => GABA	330	Arginine and proline metabolism
K00128	ALDH; aldehyde dehydrogenase [EC:1.2.1.3]	ko00001	KEGG Orthology	M00135	GABA biosynthesis; eukaryotes; putrescine => GABA	340	Histidine metabolism
K00128	ALDH; aldehyde dehydrogenase [EC:1.2.1.3]	ko00001	KEGG Orthology	M00135	GABA biosynthesis; eukaryotes; putrescine => GABA	380	Tryptophan metabolism
K00128	ALDH; aldehyde dehydrogenase [EC:1.2.1.3]	ko00001	KEGG Orthology	M00135	GABA biosynthesis; eukaryotes; putrescine => GABA	410	beta-Alanine metabolism
K00128	ALDH; aldehyde dehydrogenase [EC:1.2.1.3]	ko00001	KEGG Orthology	M00135	GABA biosynthesis; eukaryotes; putrescine => GABA	561	Glycerolipid metabolism
K00128	ALDH; aldehyde dehydrogenase [EC:1.2.1.3]	ko00001	KEGG Orthology	M00135	GABA biosynthesis; eukaryotes; putrescine => GABA	620	Pyruvate metabolism
K00128	ALDH; aldehyde dehydrogenase [EC:1.2.1.3]	ko00001	KEGG Orthology	M00135	GABA biosynthesis; eukaryotes; putrescine => GABA	625	Chloroalkane and chloroalkene degradation
K00128	ALDH; aldehyde dehydrogenase [EC:1.2.1.3]	ko00001	KEGG Orthology	M00135	GABA biosynthesis; eukaryotes; putrescine => GABA	770	Pantothenate and CoA biosynthesis
K00128	ALDH; aldehyde dehydrogenase [EC:1.2.1.3]	ko00001	KEGG Orthology	M00135	GABA biosynthesis; eukaryotes; putrescine => GABA	903	Limonene degradation
K00128	ALDH; aldehyde dehydrogenase [EC:1.2.1.3]	ko00001	KEGG Orthology	M00135	GABA biosynthesis; eukaryotes; putrescine => GABA	981	Insect hormone biosynthesis
K00128	ALDH; aldehyde dehydrogenase [EC:1.2.1.3]	ko00001	KEGG Orthology	M00135	GABA biosynthesis; eukaryotes; putrescine => GABA	1100	Metabolic pathways
K00128	ALDH; aldehyde dehydrogenase [EC:1.2.1.3]	ko00001	KEGG Orthology	M00135	GABA biosynthesis; eukaryotes; putrescine => GABA	1110	Biosynthesis of secondary metabolites
K00128	ALDH; aldehyde dehydrogenase [EC:1.2.1.3]	ko00001	KEGG Orthology	M00135	GABA biosynthesis; eukaryotes; putrescine => GABA	1120	Microbial metabolism in diverse environments
K00128	ALDH; aldehyde dehydrogenase [EC:1.2.1.3]	ko00001	KEGG Orthology	M00135	GABA biosynthesis; eukaryotes; putrescine => GABA	1240	Biosynthesis of cofactors
K00128	ALDH; aldehyde dehydrogenase [EC:1.2.1.3]	ko00001	KEGG Orthology	M00135	GABA biosynthesis; eukaryotes; putrescine => GABA	4936	Alcoholic liver disease
K00128	ALDH; aldehyde dehydrogenase [EC:1.2.1.3]	ko00001	KEGG Orthology	M00913	Pantothenate biosynthesis; 2-oxoisovalerate_spermine => pantothenate	10	Glycolysis _ Gluconeogenesis
K00128	ALDH; aldehyde dehydrogenase [EC:1.2.1.3]	ko00001	KEGG Orthology	M00913	Pantothenate biosynthesis; 2-oxoisovalerate_spermine => pantothenate	53	Ascorbate and aldarate metabolism
K00128	ALDH; aldehyde dehydrogenase [EC:1.2.1.3]	ko00001	KEGG Orthology	M00913	Pantothenate biosynthesis; 2-oxoisovalerate_spermine => pantothenate	71	Fatty acid degradation
K00128	ALDH; aldehyde dehydrogenase [EC:1.2.1.3]	ko00001	KEGG Orthology	M00913	Pantothenate biosynthesis; 2-oxoisovalerate_spermine => pantothenate	280	Valine; leucine and isoleucine degradation
K00128	ALDH; aldehyde dehydrogenase [EC:1.2.1.3]	ko00001	KEGG Orthology	M00913	Pantothenate biosynthesis; 2-oxoisovalerate_spermine => pantothenate	310	Lysine degradation
K00128	ALDH; aldehyde dehydrogenase [EC:1.2.1.3]	ko00001	KEGG Orthology	M00913	Pantothenate biosynthesis; 2-oxoisovalerate_spermine => pantothenate	330	Arginine and proline metabolism
K00128	ALDH; aldehyde dehydrogenase [EC:1.2.1.3]	ko00001	KEGG Orthology	M00913	Pantothenate biosynthesis; 2-oxoisovalerate_spermine => pantothenate	340	Histidine metabolism
K00128	ALDH; aldehyde dehydrogenase [EC:1.2.1.3]	ko00001	KEGG Orthology	M00913	Pantothenate biosynthesis; 2-oxoisovalerate_spermine => pantothenate	380	Tryptophan metabolism
K00128	ALDH; aldehyde dehydrogenase [EC:1.2.1.3]	ko00001	KEGG Orthology	M00913	Pantothenate biosynthesis; 2-oxoisovalerate_spermine => pantothenate	410	beta-Alanine metabolism
K00128	ALDH; aldehyde dehydrogenase [EC:1.2.1.3]	ko00001	KEGG Orthology	M00913	Pantothenate biosynthesis; 2-oxoisovalerate_spermine => pantothenate	561	Glycerolipid metabolism
K00128	ALDH; aldehyde dehydrogenase [EC:1.2.1.3]	ko00001	KEGG Orthology	M00913	Pantothenate biosynthesis; 2-oxoisovalerate_spermine => pantothenate	620	Pyruvate metabolism
K00128	ALDH; aldehyde dehydrogenase [EC:1.2.1.3]	ko00001	KEGG Orthology	M00913	Pantothenate biosynthesis; 2-oxoisovalerate_spermine => pantothenate	625	Chloroalkane and chloroalkene degradation
K00128	ALDH; aldehyde dehydrogenase [EC:1.2.1.3]	ko00001	KEGG Orthology	M00913	Pantothenate biosynthesis; 2-oxoisovalerate_spermine => pantothenate	770	Pantothenate and CoA biosynthesis
K00128	ALDH; aldehyde dehydrogenase [EC:1.2.1.3]	ko00001	KEGG Orthology	M00913	Pantothenate biosynthesis; 2-oxoisovalerate_spermine => pantothenate	903	Limonene degradation
K00128	ALDH; aldehyde dehydrogenase [EC:1.2.1.3]	ko00001	KEGG Orthology	M00913	Pantothenate biosynthesis; 2-oxoisovalerate_spermine => pantothenate	981	Insect hormone biosynthesis
K00128	ALDH; aldehyde dehydrogenase [EC:1.2.1.3]	ko00001	KEGG Orthology	M00913	Pantothenate biosynthesis; 2-oxoisovalerate_spermine => pantothenate	1100	Metabolic pathways
K00128	ALDH; aldehyde dehydrogenase [EC:1.2.1.3]	ko00001	KEGG Orthology	M00913	Pantothenate biosynthesis; 2-oxoisovalerate_spermine => pantothenate	1110	Biosynthesis of secondary metabolites
K00128	ALDH; aldehyde dehydrogenase [EC:1.2.1.3]	ko00001	KEGG Orthology	M00913	Pantothenate biosynthesis; 2-oxoisovalerate_spermine => pantothenate	1120	Microbial metabolism in diverse environments
K00128	ALDH; aldehyde dehydrogenase [EC:1.2.1.3]	ko00001	KEGG Orthology	M00913	Pantothenate biosynthesis; 2-oxoisovalerate_spermine => pantothenate	1240	Biosynthesis of cofactors
K00128	ALDH; aldehyde dehydrogenase [EC:1.2.1.3]	ko00001	KEGG Orthology	M00913	Pantothenate biosynthesis; 2-oxoisovalerate_spermine => pantothenate	4936	Alcoholic liver disease
K00130	betB, gbsA; betaine-aldehyde dehydrogenase [EC:1.2.1.8]	ko00001	KEGG Orthology	M00555	Betaine biosynthesis; choline => betaine	260	Glycine; serine and threonine metabolism
K00130	betB, gbsA; betaine-aldehyde dehydrogenase [EC:1.2.1.8]	ko00001	KEGG Orthology	M00555	Betaine biosynthesis; choline => betaine	1100	Metabolic pathways
K00131	gapN; glyceraldehyde-3-phosphate dehydrogenase [EC:1.2.1.9]	ko00001	KEGG Orthology	M00308	Semi-phosphorylative Entner-Doudoroff pathway; gluconate => glycerate-3P	10	Glycolysis _ Gluconeogenesis
K00131	gapN; glyceraldehyde-3-phosphate dehydrogenase [EC:1.2.1.9]	ko00001	KEGG Orthology	M00308	Semi-phosphorylative Entner-Doudoroff pathway; gluconate => glycerate-3P	30	Pentose phosphate pathway
K00131	gapN; glyceraldehyde-3-phosphate dehydrogenase [EC:1.2.1.9]	ko00001	KEGG Orthology	M00308	Semi-phosphorylative Entner-Doudoroff pathway; gluconate => glycerate-3P	1100	Metabolic pathways
K00131	gapN; glyceraldehyde-3-phosphate dehydrogenase [EC:1.2.1.9]	ko00001	KEGG Orthology	M00308	Semi-phosphorylative Entner-Doudoroff pathway; gluconate => glycerate-3P	1120	Microbial metabolism in diverse environments
K00131	gapN; glyceraldehyde-3-phosphate dehydrogenase [EC:1.2.1.9]	ko00001	KEGG Orthology	M00308	Semi-phosphorylative Entner-Doudoroff pathway; gluconate => glycerate-3P	1200	Carbon metabolism
K00132	E1.2.1.10; acetaldehyde dehydrogenase [EC:1.2.1.10]	ko00001	KEGG Orthology	NA	NA	620	Pyruvate metabolism
K00132	E1.2.1.10; acetaldehyde dehydrogenase [EC:1.2.1.10]	ko00001	KEGG Orthology	NA	NA	650	Butanoate metabolism
K00132	E1.2.1.10; acetaldehyde dehydrogenase [EC:1.2.1.10]	ko00001	KEGG Orthology	NA	NA	1100	Metabolic pathways
K00132	E1.2.1.10; acetaldehyde dehydrogenase [EC:1.2.1.10]	ko00001	KEGG Orthology	NA	NA	1120	Microbial metabolism in diverse environments
K00133	asd; aspartate-semialdehyde dehydrogenase [EC:1.2.1.11]	ko00001	KEGG Orthology	M00016	Lysine biosynthesis; succinyl-DAP pathway; aspartate => lysine	260	Glycine; serine and threonine metabolism
K00133	asd; aspartate-semialdehyde dehydrogenase [EC:1.2.1.11]	ko00001	KEGG Orthology	M00016	Lysine biosynthesis; succinyl-DAP pathway; aspartate => lysine	261	Monobactam biosynthesis
K00133	asd; aspartate-semialdehyde dehydrogenase [EC:1.2.1.11]	ko00001	KEGG Orthology	M00016	Lysine biosynthesis; succinyl-DAP pathway; aspartate => lysine	270	Cysteine and methionine metabolism
K00133	asd; aspartate-semialdehyde dehydrogenase [EC:1.2.1.11]	ko00001	KEGG Orthology	M00016	Lysine biosynthesis; succinyl-DAP pathway; aspartate => lysine	300	Lysine biosynthesis
K00133	asd; aspartate-semialdehyde dehydrogenase [EC:1.2.1.11]	ko00001	KEGG Orthology	M00016	Lysine biosynthesis; succinyl-DAP pathway; aspartate => lysine	1100	Metabolic pathways
K00133	asd; aspartate-semialdehyde dehydrogenase [EC:1.2.1.11]	ko00001	KEGG Orthology	M00016	Lysine biosynthesis; succinyl-DAP pathway; aspartate => lysine	1110	Biosynthesis of secondary metabolites
K00133	asd; aspartate-semialdehyde dehydrogenase [EC:1.2.1.11]	ko00001	KEGG Orthology	M00016	Lysine biosynthesis; succinyl-DAP pathway; aspartate => lysine	1120	Microbial metabolism in diverse environments
K00133	asd; aspartate-semialdehyde dehydrogenase [EC:1.2.1.11]	ko00001	KEGG Orthology	M00016	Lysine biosynthesis; succinyl-DAP pathway; aspartate => lysine	1210	2-Oxocarboxylic acid metabolism
K00133	asd; aspartate-semialdehyde dehydrogenase [EC:1.2.1.11]	ko00001	KEGG Orthology	M00016	Lysine biosynthesis; succinyl-DAP pathway; aspartate => lysine	1230	Biosynthesis of amino acids
K00133	asd; aspartate-semialdehyde dehydrogenase [EC:1.2.1.11]	ko00001	KEGG Orthology	M00017	Methionine biosynthesis; aspartate => homoserine => methionine	260	Glycine; serine and threonine metabolism
K00133	asd; aspartate-semialdehyde dehydrogenase [EC:1.2.1.11]	ko00001	KEGG Orthology	M00017	Methionine biosynthesis; aspartate => homoserine => methionine	261	Monobactam biosynthesis
K00133	asd; aspartate-semialdehyde dehydrogenase [EC:1.2.1.11]	ko00001	KEGG Orthology	M00017	Methionine biosynthesis; aspartate => homoserine => methionine	270	Cysteine and methionine metabolism
K00133	asd; aspartate-semialdehyde dehydrogenase [EC:1.2.1.11]	ko00001	KEGG Orthology	M00017	Methionine biosynthesis; aspartate => homoserine => methionine	300	Lysine biosynthesis
K00133	asd; aspartate-semialdehyde dehydrogenase [EC:1.2.1.11]	ko00001	KEGG Orthology	M00017	Methionine biosynthesis; aspartate => homoserine => methionine	1100	Metabolic pathways
K00133	asd; aspartate-semialdehyde dehydrogenase [EC:1.2.1.11]	ko00001	KEGG Orthology	M00017	Methionine biosynthesis; aspartate => homoserine => methionine	1110	Biosynthesis of secondary metabolites
K00133	asd; aspartate-semialdehyde dehydrogenase [EC:1.2.1.11]	ko00001	KEGG Orthology	M00017	Methionine biosynthesis; aspartate => homoserine => methionine	1120	Microbial metabolism in diverse environments
K00133	asd; aspartate-semialdehyde dehydrogenase [EC:1.2.1.11]	ko00001	KEGG Orthology	M00017	Methionine biosynthesis; aspartate => homoserine => methionine	1210	2-Oxocarboxylic acid metabolism
K00133	asd; aspartate-semialdehyde dehydrogenase [EC:1.2.1.11]	ko00001	KEGG Orthology	M00017	Methionine biosynthesis; aspartate => homoserine => methionine	1230	Biosynthesis of amino acids
K00133	asd; aspartate-semialdehyde dehydrogenase [EC:1.2.1.11]	ko00001	KEGG Orthology	M00018	Threonine biosynthesis; aspartate => homoserine => threonine	260	Glycine; serine and threonine metabolism
K00133	asd; aspartate-semialdehyde dehydrogenase [EC:1.2.1.11]	ko00001	KEGG Orthology	M00018	Threonine biosynthesis; aspartate => homoserine => threonine	261	Monobactam biosynthesis
K00133	asd; aspartate-semialdehyde dehydrogenase [EC:1.2.1.11]	ko00001	KEGG Orthology	M00018	Threonine biosynthesis; aspartate => homoserine => threonine	270	Cysteine and methionine metabolism
K00133	asd; aspartate-semialdehyde dehydrogenase [EC:1.2.1.11]	ko00001	KEGG Orthology	M00018	Threonine biosynthesis; aspartate => homoserine => threonine	300	Lysine biosynthesis
K00133	asd; aspartate-semialdehyde dehydrogenase [EC:1.2.1.11]	ko00001	KEGG Orthology	M00018	Threonine biosynthesis; aspartate => homoserine => threonine	1100	Metabolic pathways
K00133	asd; aspartate-semialdehyde dehydrogenase [EC:1.2.1.11]	ko00001	KEGG Orthology	M00018	Threonine biosynthesis; aspartate => homoserine => threonine	1110	Biosynthesis of secondary metabolites
K00133	asd; aspartate-semialdehyde dehydrogenase [EC:1.2.1.11]	ko00001	KEGG Orthology	M00018	Threonine biosynthesis; aspartate => homoserine => threonine	1120	Microbial metabolism in diverse environments
K00133	asd; aspartate-semialdehyde dehydrogenase [EC:1.2.1.11]	ko00001	KEGG Orthology	M00018	Threonine biosynthesis; aspartate => homoserine => threonine	1210	2-Oxocarboxylic acid metabolism
K00133	asd; aspartate-semialdehyde dehydrogenase [EC:1.2.1.11]	ko00001	KEGG Orthology	M00018	Threonine biosynthesis; aspartate => homoserine => threonine	1230	Biosynthesis of amino acids
K00133	asd; aspartate-semialdehyde dehydrogenase [EC:1.2.1.11]	ko00001	KEGG Orthology	M00033	Ectoine biosynthesis; aspartate => ectoine	260	Glycine; serine and threonine metabolism
K00133	asd; aspartate-semialdehyde dehydrogenase [EC:1.2.1.11]	ko00001	KEGG Orthology	M00033	Ectoine biosynthesis; aspartate => ectoine	261	Monobactam biosynthesis
K00133	asd; aspartate-semialdehyde dehydrogenase [EC:1.2.1.11]	ko00001	KEGG Orthology	M00033	Ectoine biosynthesis; aspartate => ectoine	270	Cysteine and methionine metabolism
K00133	asd; aspartate-semialdehyde dehydrogenase [EC:1.2.1.11]	ko00001	KEGG Orthology	M00033	Ectoine biosynthesis; aspartate => ectoine	300	Lysine biosynthesis
K00133	asd; aspartate-semialdehyde dehydrogenase [EC:1.2.1.11]	ko00001	KEGG Orthology	M00033	Ectoine biosynthesis; aspartate => ectoine	1100	Metabolic pathways
K00133	asd; aspartate-semialdehyde dehydrogenase [EC:1.2.1.11]	ko00001	KEGG Orthology	M00033	Ectoine biosynthesis; aspartate => ectoine	1110	Biosynthesis of secondary metabolites
K00133	asd; aspartate-semialdehyde dehydrogenase [EC:1.2.1.11]	ko00001	KEGG Orthology	M00033	Ectoine biosynthesis; aspartate => ectoine	1120	Microbial metabolism in diverse environments
K00133	asd; aspartate-semialdehyde dehydrogenase [EC:1.2.1.11]	ko00001	KEGG Orthology	M00033	Ectoine biosynthesis; aspartate => ectoine	1210	2-Oxocarboxylic acid metabolism
K00133	asd; aspartate-semialdehyde dehydrogenase [EC:1.2.1.11]	ko00001	KEGG Orthology	M00033	Ectoine biosynthesis; aspartate => ectoine	1230	Biosynthesis of amino acids
K00133	asd; aspartate-semialdehyde dehydrogenase [EC:1.2.1.11]	ko00001	KEGG Orthology	M00525	Lysine biosynthesis; acetyl-DAP pathway; aspartate => lysine	260	Glycine; serine and threonine metabolism
K00133	asd; aspartate-semialdehyde dehydrogenase [EC:1.2.1.11]	ko00001	KEGG Orthology	M00525	Lysine biosynthesis; acetyl-DAP pathway; aspartate => lysine	261	Monobactam biosynthesis
K00133	asd; aspartate-semialdehyde dehydrogenase [EC:1.2.1.11]	ko00001	KEGG Orthology	M00525	Lysine biosynthesis; acetyl-DAP pathway; aspartate => lysine	270	Cysteine and methionine metabolism
K00133	asd; aspartate-semialdehyde dehydrogenase [EC:1.2.1.11]	ko00001	KEGG Orthology	M00525	Lysine biosynthesis; acetyl-DAP pathway; aspartate => lysine	300	Lysine biosynthesis
K00133	asd; aspartate-semialdehyde dehydrogenase [EC:1.2.1.11]	ko00001	KEGG Orthology	M00525	Lysine biosynthesis; acetyl-DAP pathway; aspartate => lysine	1100	Metabolic pathways
K00133	asd; aspartate-semialdehyde dehydrogenase [EC:1.2.1.11]	ko00001	KEGG Orthology	M00525	Lysine biosynthesis; acetyl-DAP pathway; aspartate => lysine	1110	Biosynthesis of secondary metabolites
K00133	asd; aspartate-semialdehyde dehydrogenase [EC:1.2.1.11]	ko00001	KEGG Orthology	M00525	Lysine biosynthesis; acetyl-DAP pathway; aspartate => lysine	1120	Microbial metabolism in diverse environments
K00133	asd; aspartate-semialdehyde dehydrogenase [EC:1.2.1.11]	ko00001	KEGG Orthology	M00525	Lysine biosynthesis; acetyl-DAP pathway; aspartate => lysine	1210	2-Oxocarboxylic acid metabolism
K00133	asd; aspartate-semialdehyde dehydrogenase [EC:1.2.1.11]	ko00001	KEGG Orthology	M00525	Lysine biosynthesis; acetyl-DAP pathway; aspartate => lysine	1230	Biosynthesis of amino acids
K00133	asd; aspartate-semialdehyde dehydrogenase [EC:1.2.1.11]	ko00001	KEGG Orthology	M00526	Lysine biosynthesis; DAP dehydrogenase pathway; aspartate => lysine	260	Glycine; serine and threonine metabolism
K00133	asd; aspartate-semialdehyde dehydrogenase [EC:1.2.1.11]	ko00001	KEGG Orthology	M00526	Lysine biosynthesis; DAP dehydrogenase pathway; aspartate => lysine	261	Monobactam biosynthesis
K00133	asd; aspartate-semialdehyde dehydrogenase [EC:1.2.1.11]	ko00001	KEGG Orthology	M00526	Lysine biosynthesis; DAP dehydrogenase pathway; aspartate => lysine	270	Cysteine and methionine metabolism
K00133	asd; aspartate-semialdehyde dehydrogenase [EC:1.2.1.11]	ko00001	KEGG Orthology	M00526	Lysine biosynthesis; DAP dehydrogenase pathway; aspartate => lysine	300	Lysine biosynthesis
K00133	asd; aspartate-semialdehyde dehydrogenase [EC:1.2.1.11]	ko00001	KEGG Orthology	M00526	Lysine biosynthesis; DAP dehydrogenase pathway; aspartate => lysine	1100	Metabolic pathways
K00133	asd; aspartate-semialdehyde dehydrogenase [EC:1.2.1.11]	ko00001	KEGG Orthology	M00526	Lysine biosynthesis; DAP dehydrogenase pathway; aspartate => lysine	1110	Biosynthesis of secondary metabolites
K00133	asd; aspartate-semialdehyde dehydrogenase [EC:1.2.1.11]	ko00001	KEGG Orthology	M00526	Lysine biosynthesis; DAP dehydrogenase pathway; aspartate => lysine	1120	Microbial metabolism in diverse environments
K00133	asd; aspartate-semialdehyde dehydrogenase [EC:1.2.1.11]	ko00001	KEGG Orthology	M00526	Lysine biosynthesis; DAP dehydrogenase pathway; aspartate => lysine	1210	2-Oxocarboxylic acid metabolism
K00133	asd; aspartate-semialdehyde dehydrogenase [EC:1.2.1.11]	ko00001	KEGG Orthology	M00526	Lysine biosynthesis; DAP dehydrogenase pathway; aspartate => lysine	1230	Biosynthesis of amino acids
K00133	asd; aspartate-semialdehyde dehydrogenase [EC:1.2.1.11]	ko00001	KEGG Orthology	M00527	Lysine biosynthesis; DAP aminotransferase pathway; aspartate => lysine	260	Glycine; serine and threonine metabolism
K00133	asd; aspartate-semialdehyde dehydrogenase [EC:1.2.1.11]	ko00001	KEGG Orthology	M00527	Lysine biosynthesis; DAP aminotransferase pathway; aspartate => lysine	261	Monobactam biosynthesis
K00133	asd; aspartate-semialdehyde dehydrogenase [EC:1.2.1.11]	ko00001	KEGG Orthology	M00527	Lysine biosynthesis; DAP aminotransferase pathway; aspartate => lysine	270	Cysteine and methionine metabolism
K00133	asd; aspartate-semialdehyde dehydrogenase [EC:1.2.1.11]	ko00001	KEGG Orthology	M00527	Lysine biosynthesis; DAP aminotransferase pathway; aspartate => lysine	300	Lysine biosynthesis
K00133	asd; aspartate-semialdehyde dehydrogenase [EC:1.2.1.11]	ko00001	KEGG Orthology	M00527	Lysine biosynthesis; DAP aminotransferase pathway; aspartate => lysine	1100	Metabolic pathways
K00133	asd; aspartate-semialdehyde dehydrogenase [EC:1.2.1.11]	ko00001	KEGG Orthology	M00527	Lysine biosynthesis; DAP aminotransferase pathway; aspartate => lysine	1110	Biosynthesis of secondary metabolites
K00133	asd; aspartate-semialdehyde dehydrogenase [EC:1.2.1.11]	ko00001	KEGG Orthology	M00527	Lysine biosynthesis; DAP aminotransferase pathway; aspartate => lysine	1120	Microbial metabolism in diverse environments
K00133	asd; aspartate-semialdehyde dehydrogenase [EC:1.2.1.11]	ko00001	KEGG Orthology	M00527	Lysine biosynthesis; DAP aminotransferase pathway; aspartate => lysine	1210	2-Oxocarboxylic acid metabolism
K00133	asd; aspartate-semialdehyde dehydrogenase [EC:1.2.1.11]	ko00001	KEGG Orthology	M00527	Lysine biosynthesis; DAP aminotransferase pathway; aspartate => lysine	1230	Biosynthesis of amino acids
K00134	GAPDH, gapA; glyceraldehyde 3-phosphate dehydrogenase [EC:1.2.1.12]	ko00001	KEGG Orthology	M00001	Glycolysis	10	Glycolysis _ Gluconeogenesis
K00134	GAPDH, gapA; glyceraldehyde 3-phosphate dehydrogenase [EC:1.2.1.12]	ko00001	KEGG Orthology	M00001	Glycolysis	710	Carbon fixation in photosynthetic organisms
K00134	GAPDH, gapA; glyceraldehyde 3-phosphate dehydrogenase [EC:1.2.1.12]	ko00001	KEGG Orthology	M00001	Glycolysis	1100	Metabolic pathways
K00134	GAPDH, gapA; glyceraldehyde 3-phosphate dehydrogenase [EC:1.2.1.12]	ko00001	KEGG Orthology	M00001	Glycolysis	1110	Biosynthesis of secondary metabolites
K00134	GAPDH, gapA; glyceraldehyde 3-phosphate dehydrogenase [EC:1.2.1.12]	ko00001	KEGG Orthology	M00001	Glycolysis	1120	Microbial metabolism in diverse environments
K00134	GAPDH, gapA; glyceraldehyde 3-phosphate dehydrogenase [EC:1.2.1.12]	ko00001	KEGG Orthology	M00001	Glycolysis	1200	Carbon metabolism
K00134	GAPDH, gapA; glyceraldehyde 3-phosphate dehydrogenase [EC:1.2.1.12]	ko00001	KEGG Orthology	M00001	Glycolysis	1230	Biosynthesis of amino acids
K00134	GAPDH, gapA; glyceraldehyde 3-phosphate dehydrogenase [EC:1.2.1.12]	ko00001	KEGG Orthology	M00001	Glycolysis	4066	HIF-1 signaling pathway
K00134	GAPDH, gapA; glyceraldehyde 3-phosphate dehydrogenase [EC:1.2.1.12]	ko00001	KEGG Orthology	M00001	Glycolysis	5010	Alzheimer disease
K00134	GAPDH, gapA; glyceraldehyde 3-phosphate dehydrogenase [EC:1.2.1.12]	ko00001	KEGG Orthology	M00001	Glycolysis	5130	Pathogenic Escherichia coli infection
K00134	GAPDH, gapA; glyceraldehyde 3-phosphate dehydrogenase [EC:1.2.1.12]	ko00001	KEGG Orthology	M00001	Glycolysis	5132	Salmonella infection
K00134	GAPDH, gapA; glyceraldehyde 3-phosphate dehydrogenase [EC:1.2.1.12]	ko00001	KEGG Orthology	M00001	Glycolysis	5415	Diabetic cardiomyopathy
K00134	GAPDH, gapA; glyceraldehyde 3-phosphate dehydrogenase [EC:1.2.1.12]	ko00001	KEGG Orthology	M00002	Glycolysis; core module involving three-carbon compounds	10	Glycolysis _ Gluconeogenesis
K00134	GAPDH, gapA; glyceraldehyde 3-phosphate dehydrogenase [EC:1.2.1.12]	ko00001	KEGG Orthology	M00002	Glycolysis; core module involving three-carbon compounds	710	Carbon fixation in photosynthetic organisms
K00134	GAPDH, gapA; glyceraldehyde 3-phosphate dehydrogenase [EC:1.2.1.12]	ko00001	KEGG Orthology	M00002	Glycolysis; core module involving three-carbon compounds	1100	Metabolic pathways
K00134	GAPDH, gapA; glyceraldehyde 3-phosphate dehydrogenase [EC:1.2.1.12]	ko00001	KEGG Orthology	M00002	Glycolysis; core module involving three-carbon compounds	1110	Biosynthesis of secondary metabolites
K00134	GAPDH, gapA; glyceraldehyde 3-phosphate dehydrogenase [EC:1.2.1.12]	ko00001	KEGG Orthology	M00002	Glycolysis; core module involving three-carbon compounds	1120	Microbial metabolism in diverse environments
K00134	GAPDH, gapA; glyceraldehyde 3-phosphate dehydrogenase [EC:1.2.1.12]	ko00001	KEGG Orthology	M00002	Glycolysis; core module involving three-carbon compounds	1200	Carbon metabolism
K00134	GAPDH, gapA; glyceraldehyde 3-phosphate dehydrogenase [EC:1.2.1.12]	ko00001	KEGG Orthology	M00002	Glycolysis; core module involving three-carbon compounds	1230	Biosynthesis of amino acids
K00134	GAPDH, gapA; glyceraldehyde 3-phosphate dehydrogenase [EC:1.2.1.12]	ko00001	KEGG Orthology	M00002	Glycolysis; core module involving three-carbon compounds	4066	HIF-1 signaling pathway
K00134	GAPDH, gapA; glyceraldehyde 3-phosphate dehydrogenase [EC:1.2.1.12]	ko00001	KEGG Orthology	M00002	Glycolysis; core module involving three-carbon compounds	5010	Alzheimer disease
K00134	GAPDH, gapA; glyceraldehyde 3-phosphate dehydrogenase [EC:1.2.1.12]	ko00001	KEGG Orthology	M00002	Glycolysis; core module involving three-carbon compounds	5130	Pathogenic Escherichia coli infection
K00134	GAPDH, gapA; glyceraldehyde 3-phosphate dehydrogenase [EC:1.2.1.12]	ko00001	KEGG Orthology	M00002	Glycolysis; core module involving three-carbon compounds	5132	Salmonella infection
K00134	GAPDH, gapA; glyceraldehyde 3-phosphate dehydrogenase [EC:1.2.1.12]	ko00001	KEGG Orthology	M00002	Glycolysis; core module involving three-carbon compounds	5415	Diabetic cardiomyopathy
K00134	GAPDH, gapA; glyceraldehyde 3-phosphate dehydrogenase [EC:1.2.1.12]	ko00001	KEGG Orthology	M00003	Gluconeogenesis; oxaloacetate => fructose-6P	10	Glycolysis _ Gluconeogenesis
K00134	GAPDH, gapA; glyceraldehyde 3-phosphate dehydrogenase [EC:1.2.1.12]	ko00001	KEGG Orthology	M00003	Gluconeogenesis; oxaloacetate => fructose-6P	710	Carbon fixation in photosynthetic organisms
K00134	GAPDH, gapA; glyceraldehyde 3-phosphate dehydrogenase [EC:1.2.1.12]	ko00001	KEGG Orthology	M00003	Gluconeogenesis; oxaloacetate => fructose-6P	1100	Metabolic pathways
K00134	GAPDH, gapA; glyceraldehyde 3-phosphate dehydrogenase [EC:1.2.1.12]	ko00001	KEGG Orthology	M00003	Gluconeogenesis; oxaloacetate => fructose-6P	1110	Biosynthesis of secondary metabolites
K00134	GAPDH, gapA; glyceraldehyde 3-phosphate dehydrogenase [EC:1.2.1.12]	ko00001	KEGG Orthology	M00003	Gluconeogenesis; oxaloacetate => fructose-6P	1120	Microbial metabolism in diverse environments
K00134	GAPDH, gapA; glyceraldehyde 3-phosphate dehydrogenase [EC:1.2.1.12]	ko00001	KEGG Orthology	M00003	Gluconeogenesis; oxaloacetate => fructose-6P	1200	Carbon metabolism
K00134	GAPDH, gapA; glyceraldehyde 3-phosphate dehydrogenase [EC:1.2.1.12]	ko00001	KEGG Orthology	M00003	Gluconeogenesis; oxaloacetate => fructose-6P	1230	Biosynthesis of amino acids
K00134	GAPDH, gapA; glyceraldehyde 3-phosphate dehydrogenase [EC:1.2.1.12]	ko00001	KEGG Orthology	M00003	Gluconeogenesis; oxaloacetate => fructose-6P	4066	HIF-1 signaling pathway
K00134	GAPDH, gapA; glyceraldehyde 3-phosphate dehydrogenase [EC:1.2.1.12]	ko00001	KEGG Orthology	M00003	Gluconeogenesis; oxaloacetate => fructose-6P	5010	Alzheimer disease
K00134	GAPDH, gapA; glyceraldehyde 3-phosphate dehydrogenase [EC:1.2.1.12]	ko00001	KEGG Orthology	M00003	Gluconeogenesis; oxaloacetate => fructose-6P	5130	Pathogenic Escherichia coli infection
K00134	GAPDH, gapA; glyceraldehyde 3-phosphate dehydrogenase [EC:1.2.1.12]	ko00001	KEGG Orthology	M00003	Gluconeogenesis; oxaloacetate => fructose-6P	5132	Salmonella infection
K00134	GAPDH, gapA; glyceraldehyde 3-phosphate dehydrogenase [EC:1.2.1.12]	ko00001	KEGG Orthology	M00003	Gluconeogenesis; oxaloacetate => fructose-6P	5415	Diabetic cardiomyopathy
K00134	GAPDH, gapA; glyceraldehyde 3-phosphate dehydrogenase [EC:1.2.1.12]	ko00001	KEGG Orthology	M00165	Reductive pentose phosphate cycle	10	Glycolysis _ Gluconeogenesis
K00134	GAPDH, gapA; glyceraldehyde 3-phosphate dehydrogenase [EC:1.2.1.12]	ko00001	KEGG Orthology	M00165	Reductive pentose phosphate cycle	710	Carbon fixation in photosynthetic organisms
K00134	GAPDH, gapA; glyceraldehyde 3-phosphate dehydrogenase [EC:1.2.1.12]	ko00001	KEGG Orthology	M00165	Reductive pentose phosphate cycle	1100	Metabolic pathways
K00134	GAPDH, gapA; glyceraldehyde 3-phosphate dehydrogenase [EC:1.2.1.12]	ko00001	KEGG Orthology	M00165	Reductive pentose phosphate cycle	1110	Biosynthesis of secondary metabolites
K00134	GAPDH, gapA; glyceraldehyde 3-phosphate dehydrogenase [EC:1.2.1.12]	ko00001	KEGG Orthology	M00165	Reductive pentose phosphate cycle	1120	Microbial metabolism in diverse environments
K00134	GAPDH, gapA; glyceraldehyde 3-phosphate dehydrogenase [EC:1.2.1.12]	ko00001	KEGG Orthology	M00165	Reductive pentose phosphate cycle	1200	Carbon metabolism
K00134	GAPDH, gapA; glyceraldehyde 3-phosphate dehydrogenase [EC:1.2.1.12]	ko00001	KEGG Orthology	M00165	Reductive pentose phosphate cycle	1230	Biosynthesis of amino acids
K00134	GAPDH, gapA; glyceraldehyde 3-phosphate dehydrogenase [EC:1.2.1.12]	ko00001	KEGG Orthology	M00165	Reductive pentose phosphate cycle	4066	HIF-1 signaling pathway
K00134	GAPDH, gapA; glyceraldehyde 3-phosphate dehydrogenase [EC:1.2.1.12]	ko00001	KEGG Orthology	M00165	Reductive pentose phosphate cycle	5010	Alzheimer disease
K00134	GAPDH, gapA; glyceraldehyde 3-phosphate dehydrogenase [EC:1.2.1.12]	ko00001	KEGG Orthology	M00165	Reductive pentose phosphate cycle	5130	Pathogenic Escherichia coli infection
K00134	GAPDH, gapA; glyceraldehyde 3-phosphate dehydrogenase [EC:1.2.1.12]	ko00001	KEGG Orthology	M00165	Reductive pentose phosphate cycle	5132	Salmonella infection
K00134	GAPDH, gapA; glyceraldehyde 3-phosphate dehydrogenase [EC:1.2.1.12]	ko00001	KEGG Orthology	M00165	Reductive pentose phosphate cycle	5415	Diabetic cardiomyopathy
K00134	GAPDH, gapA; glyceraldehyde 3-phosphate dehydrogenase [EC:1.2.1.12]	ko00001	KEGG Orthology	M00166	Reductive pentose phosphate cycle; ribulose-5P => glyceraldehyde-3P	10	Glycolysis _ Gluconeogenesis
K00134	GAPDH, gapA; glyceraldehyde 3-phosphate dehydrogenase [EC:1.2.1.12]	ko00001	KEGG Orthology	M00166	Reductive pentose phosphate cycle; ribulose-5P => glyceraldehyde-3P	710	Carbon fixation in photosynthetic organisms
K00134	GAPDH, gapA; glyceraldehyde 3-phosphate dehydrogenase [EC:1.2.1.12]	ko00001	KEGG Orthology	M00166	Reductive pentose phosphate cycle; ribulose-5P => glyceraldehyde-3P	1100	Metabolic pathways
K00134	GAPDH, gapA; glyceraldehyde 3-phosphate dehydrogenase [EC:1.2.1.12]	ko00001	KEGG Orthology	M00166	Reductive pentose phosphate cycle; ribulose-5P => glyceraldehyde-3P	1110	Biosynthesis of secondary metabolites
K00134	GAPDH, gapA; glyceraldehyde 3-phosphate dehydrogenase [EC:1.2.1.12]	ko00001	KEGG Orthology	M00166	Reductive pentose phosphate cycle; ribulose-5P => glyceraldehyde-3P	1120	Microbial metabolism in diverse environments
K00134	GAPDH, gapA; glyceraldehyde 3-phosphate dehydrogenase [EC:1.2.1.12]	ko00001	KEGG Orthology	M00166	Reductive pentose phosphate cycle; ribulose-5P => glyceraldehyde-3P	1200	Carbon metabolism
K00134	GAPDH, gapA; glyceraldehyde 3-phosphate dehydrogenase [EC:1.2.1.12]	ko00001	KEGG Orthology	M00166	Reductive pentose phosphate cycle; ribulose-5P => glyceraldehyde-3P	1230	Biosynthesis of amino acids
K00134	GAPDH, gapA; glyceraldehyde 3-phosphate dehydrogenase [EC:1.2.1.12]	ko00001	KEGG Orthology	M00166	Reductive pentose phosphate cycle; ribulose-5P => glyceraldehyde-3P	4066	HIF-1 signaling pathway
K00134	GAPDH, gapA; glyceraldehyde 3-phosphate dehydrogenase [EC:1.2.1.12]	ko00001	KEGG Orthology	M00166	Reductive pentose phosphate cycle; ribulose-5P => glyceraldehyde-3P	5010	Alzheimer disease
K00134	GAPDH, gapA; glyceraldehyde 3-phosphate dehydrogenase [EC:1.2.1.12]	ko00001	KEGG Orthology	M00166	Reductive pentose phosphate cycle; ribulose-5P => glyceraldehyde-3P	5130	Pathogenic Escherichia coli infection
K00134	GAPDH, gapA; glyceraldehyde 3-phosphate dehydrogenase [EC:1.2.1.12]	ko00001	KEGG Orthology	M00166	Reductive pentose phosphate cycle; ribulose-5P => glyceraldehyde-3P	5132	Salmonella infection
K00134	GAPDH, gapA; glyceraldehyde 3-phosphate dehydrogenase [EC:1.2.1.12]	ko00001	KEGG Orthology	M00166	Reductive pentose phosphate cycle; ribulose-5P => glyceraldehyde-3P	5415	Diabetic cardiomyopathy
K00134	GAPDH, gapA; glyceraldehyde 3-phosphate dehydrogenase [EC:1.2.1.12]	ko00001	KEGG Orthology	M00308	Semi-phosphorylative Entner-Doudoroff pathway; gluconate => glycerate-3P	10	Glycolysis _ Gluconeogenesis
K00134	GAPDH, gapA; glyceraldehyde 3-phosphate dehydrogenase [EC:1.2.1.12]	ko00001	KEGG Orthology	M00308	Semi-phosphorylative Entner-Doudoroff pathway; gluconate => glycerate-3P	710	Carbon fixation in photosynthetic organisms
K00134	GAPDH, gapA; glyceraldehyde 3-phosphate dehydrogenase [EC:1.2.1.12]	ko00001	KEGG Orthology	M00308	Semi-phosphorylative Entner-Doudoroff pathway; gluconate => glycerate-3P	1100	Metabolic pathways
K00134	GAPDH, gapA; glyceraldehyde 3-phosphate dehydrogenase [EC:1.2.1.12]	ko00001	KEGG Orthology	M00308	Semi-phosphorylative Entner-Doudoroff pathway; gluconate => glycerate-3P	1110	Biosynthesis of secondary metabolites
K00134	GAPDH, gapA; glyceraldehyde 3-phosphate dehydrogenase [EC:1.2.1.12]	ko00001	KEGG Orthology	M00308	Semi-phosphorylative Entner-Doudoroff pathway; gluconate => glycerate-3P	1120	Microbial metabolism in diverse environments
K00134	GAPDH, gapA; glyceraldehyde 3-phosphate dehydrogenase [EC:1.2.1.12]	ko00001	KEGG Orthology	M00308	Semi-phosphorylative Entner-Doudoroff pathway; gluconate => glycerate-3P	1200	Carbon metabolism
K00134	GAPDH, gapA; glyceraldehyde 3-phosphate dehydrogenase [EC:1.2.1.12]	ko00001	KEGG Orthology	M00308	Semi-phosphorylative Entner-Doudoroff pathway; gluconate => glycerate-3P	1230	Biosynthesis of amino acids
K00134	GAPDH, gapA; glyceraldehyde 3-phosphate dehydrogenase [EC:1.2.1.12]	ko00001	KEGG Orthology	M00308	Semi-phosphorylative Entner-Doudoroff pathway; gluconate => glycerate-3P	4066	HIF-1 signaling pathway
K00134	GAPDH, gapA; glyceraldehyde 3-phosphate dehydrogenase [EC:1.2.1.12]	ko00001	KEGG Orthology	M00308	Semi-phosphorylative Entner-Doudoroff pathway; gluconate => glycerate-3P	5010	Alzheimer disease
K00134	GAPDH, gapA; glyceraldehyde 3-phosphate dehydrogenase [EC:1.2.1.12]	ko00001	KEGG Orthology	M00308	Semi-phosphorylative Entner-Doudoroff pathway; gluconate => glycerate-3P	5130	Pathogenic Escherichia coli infection
K00134	GAPDH, gapA; glyceraldehyde 3-phosphate dehydrogenase [EC:1.2.1.12]	ko00001	KEGG Orthology	M00308	Semi-phosphorylative Entner-Doudoroff pathway; gluconate => glycerate-3P	5132	Salmonella infection
K00134	GAPDH, gapA; glyceraldehyde 3-phosphate dehydrogenase [EC:1.2.1.12]	ko00001	KEGG Orthology	M00308	Semi-phosphorylative Entner-Doudoroff pathway; gluconate => glycerate-3P	5415	Diabetic cardiomyopathy
K00134	GAPDH, gapA; glyceraldehyde 3-phosphate dehydrogenase [EC:1.2.1.12]	ko00001	KEGG Orthology	M00552	D-galactonate degradation; De Ley-Doudoroff pathway; D-galactonate => glycerate-3P	10	Glycolysis _ Gluconeogenesis
K00134	GAPDH, gapA; glyceraldehyde 3-phosphate dehydrogenase [EC:1.2.1.12]	ko00001	KEGG Orthology	M00552	D-galactonate degradation; De Ley-Doudoroff pathway; D-galactonate => glycerate-3P	710	Carbon fixation in photosynthetic organisms
K00134	GAPDH, gapA; glyceraldehyde 3-phosphate dehydrogenase [EC:1.2.1.12]	ko00001	KEGG Orthology	M00552	D-galactonate degradation; De Ley-Doudoroff pathway; D-galactonate => glycerate-3P	1100	Metabolic pathways
K00134	GAPDH, gapA; glyceraldehyde 3-phosphate dehydrogenase [EC:1.2.1.12]	ko00001	KEGG Orthology	M00552	D-galactonate degradation; De Ley-Doudoroff pathway; D-galactonate => glycerate-3P	1110	Biosynthesis of secondary metabolites
K00134	GAPDH, gapA; glyceraldehyde 3-phosphate dehydrogenase [EC:1.2.1.12]	ko00001	KEGG Orthology	M00552	D-galactonate degradation; De Ley-Doudoroff pathway; D-galactonate => glycerate-3P	1120	Microbial metabolism in diverse environments
K00134	GAPDH, gapA; glyceraldehyde 3-phosphate dehydrogenase [EC:1.2.1.12]	ko00001	KEGG Orthology	M00552	D-galactonate degradation; De Ley-Doudoroff pathway; D-galactonate => glycerate-3P	1200	Carbon metabolism
K00134	GAPDH, gapA; glyceraldehyde 3-phosphate dehydrogenase [EC:1.2.1.12]	ko00001	KEGG Orthology	M00552	D-galactonate degradation; De Ley-Doudoroff pathway; D-galactonate => glycerate-3P	1230	Biosynthesis of amino acids
K00134	GAPDH, gapA; glyceraldehyde 3-phosphate dehydrogenase [EC:1.2.1.12]	ko00001	KEGG Orthology	M00552	D-galactonate degradation; De Ley-Doudoroff pathway; D-galactonate => glycerate-3P	4066	HIF-1 signaling pathway
K00134	GAPDH, gapA; glyceraldehyde 3-phosphate dehydrogenase [EC:1.2.1.12]	ko00001	KEGG Orthology	M00552	D-galactonate degradation; De Ley-Doudoroff pathway; D-galactonate => glycerate-3P	5010	Alzheimer disease
K00134	GAPDH, gapA; glyceraldehyde 3-phosphate dehydrogenase [EC:1.2.1.12]	ko00001	KEGG Orthology	M00552	D-galactonate degradation; De Ley-Doudoroff pathway; D-galactonate => glycerate-3P	5130	Pathogenic Escherichia coli infection
K00134	GAPDH, gapA; glyceraldehyde 3-phosphate dehydrogenase [EC:1.2.1.12]	ko00001	KEGG Orthology	M00552	D-galactonate degradation; De Ley-Doudoroff pathway; D-galactonate => glycerate-3P	5132	Salmonella infection
K00134	GAPDH, gapA; glyceraldehyde 3-phosphate dehydrogenase [EC:1.2.1.12]	ko00001	KEGG Orthology	M00552	D-galactonate degradation; De Ley-Doudoroff pathway; D-galactonate => glycerate-3P	5415	Diabetic cardiomyopathy
K00135	gabD; succinate-semialdehyde dehydrogenase / glutarate-semialdehyde dehydrogenase [EC:1.2.1.16 1.2.1.79 1.2.1.20]	ko00001	KEGG Orthology	M00027	GABA	250	Alanine; aspartate and glutamate metabolism
K00135	gabD; succinate-semialdehyde dehydrogenase / glutarate-semialdehyde dehydrogenase [EC:1.2.1.16 1.2.1.79 1.2.1.20]	ko00001	KEGG Orthology	M00027	GABA	310	Lysine degradation
K00135	gabD; succinate-semialdehyde dehydrogenase / glutarate-semialdehyde dehydrogenase [EC:1.2.1.16 1.2.1.79 1.2.1.20]	ko00001	KEGG Orthology	M00027	GABA	350	Tyrosine metabolism
K00135	gabD; succinate-semialdehyde dehydrogenase / glutarate-semialdehyde dehydrogenase [EC:1.2.1.16 1.2.1.79 1.2.1.20]	ko00001	KEGG Orthology	M00027	GABA	650	Butanoate metabolism
K00135	gabD; succinate-semialdehyde dehydrogenase / glutarate-semialdehyde dehydrogenase [EC:1.2.1.16 1.2.1.79 1.2.1.20]	ko00001	KEGG Orthology	M00027	GABA	760	Nicotinate and nicotinamide metabolism
K00135	gabD; succinate-semialdehyde dehydrogenase / glutarate-semialdehyde dehydrogenase [EC:1.2.1.16 1.2.1.79 1.2.1.20]	ko00001	KEGG Orthology	M00027	GABA	1100	Metabolic pathways
K00135	gabD; succinate-semialdehyde dehydrogenase / glutarate-semialdehyde dehydrogenase [EC:1.2.1.16 1.2.1.79 1.2.1.20]	ko00001	KEGG Orthology	M00027	GABA	1120	Microbial metabolism in diverse environments
K00135	gabD; succinate-semialdehyde dehydrogenase / glutarate-semialdehyde dehydrogenase [EC:1.2.1.16 1.2.1.79 1.2.1.20]	ko00001	KEGG Orthology	M00956	Lysine degradation; bacteria; L-lysine => succinate	250	Alanine; aspartate and glutamate metabolism
K00135	gabD; succinate-semialdehyde dehydrogenase / glutarate-semialdehyde dehydrogenase [EC:1.2.1.16 1.2.1.79 1.2.1.20]	ko00001	KEGG Orthology	M00956	Lysine degradation; bacteria; L-lysine => succinate	310	Lysine degradation
K00135	gabD; succinate-semialdehyde dehydrogenase / glutarate-semialdehyde dehydrogenase [EC:1.2.1.16 1.2.1.79 1.2.1.20]	ko00001	KEGG Orthology	M00956	Lysine degradation; bacteria; L-lysine => succinate	350	Tyrosine metabolism
K00135	gabD; succinate-semialdehyde dehydrogenase / glutarate-semialdehyde dehydrogenase [EC:1.2.1.16 1.2.1.79 1.2.1.20]	ko00001	KEGG Orthology	M00956	Lysine degradation; bacteria; L-lysine => succinate	650	Butanoate metabolism
K00135	gabD; succinate-semialdehyde dehydrogenase / glutarate-semialdehyde dehydrogenase [EC:1.2.1.16 1.2.1.79 1.2.1.20]	ko00001	KEGG Orthology	M00956	Lysine degradation; bacteria; L-lysine => succinate	760	Nicotinate and nicotinamide metabolism
K00135	gabD; succinate-semialdehyde dehydrogenase / glutarate-semialdehyde dehydrogenase [EC:1.2.1.16 1.2.1.79 1.2.1.20]	ko00001	KEGG Orthology	M00956	Lysine degradation; bacteria; L-lysine => succinate	1100	Metabolic pathways
K00135	gabD; succinate-semialdehyde dehydrogenase / glutarate-semialdehyde dehydrogenase [EC:1.2.1.16 1.2.1.79 1.2.1.20]	ko00001	KEGG Orthology	M00956	Lysine degradation; bacteria; L-lysine => succinate	1120	Microbial metabolism in diverse environments
K00135	gabD; succinate-semialdehyde dehydrogenase / glutarate-semialdehyde dehydrogenase [EC:1.2.1.16 1.2.1.79 1.2.1.20]	ko00001	KEGG Orthology	M00957	Lysine degradation; bacteria; L-lysine => glutarate => succinate_acetyl-CoA	250	Alanine; aspartate and glutamate metabolism
K00135	gabD; succinate-semialdehyde dehydrogenase / glutarate-semialdehyde dehydrogenase [EC:1.2.1.16 1.2.1.79 1.2.1.20]	ko00001	KEGG Orthology	M00957	Lysine degradation; bacteria; L-lysine => glutarate => succinate_acetyl-CoA	310	Lysine degradation
K00135	gabD; succinate-semialdehyde dehydrogenase / glutarate-semialdehyde dehydrogenase [EC:1.2.1.16 1.2.1.79 1.2.1.20]	ko00001	KEGG Orthology	M00957	Lysine degradation; bacteria; L-lysine => glutarate => succinate_acetyl-CoA	350	Tyrosine metabolism
K00135	gabD; succinate-semialdehyde dehydrogenase / glutarate-semialdehyde dehydrogenase [EC:1.2.1.16 1.2.1.79 1.2.1.20]	ko00001	KEGG Orthology	M00957	Lysine degradation; bacteria; L-lysine => glutarate => succinate_acetyl-CoA	650	Butanoate metabolism
K00135	gabD; succinate-semialdehyde dehydrogenase / glutarate-semialdehyde dehydrogenase [EC:1.2.1.16 1.2.1.79 1.2.1.20]	ko00001	KEGG Orthology	M00957	Lysine degradation; bacteria; L-lysine => glutarate => succinate_acetyl-CoA	760	Nicotinate and nicotinamide metabolism
K00135	gabD; succinate-semialdehyde dehydrogenase / glutarate-semialdehyde dehydrogenase [EC:1.2.1.16 1.2.1.79 1.2.1.20]	ko00001	KEGG Orthology	M00957	Lysine degradation; bacteria; L-lysine => glutarate => succinate_acetyl-CoA	1100	Metabolic pathways
K00135	gabD; succinate-semialdehyde dehydrogenase / glutarate-semialdehyde dehydrogenase [EC:1.2.1.16 1.2.1.79 1.2.1.20]	ko00001	KEGG Orthology	M00957	Lysine degradation; bacteria; L-lysine => glutarate => succinate_acetyl-CoA	1120	Microbial metabolism in diverse environments
K00137	prr; aminobutyraldehyde dehydrogenase [EC:1.2.1.19]	ko00001	KEGG Orthology	M00956	Lysine degradation; bacteria; L-lysine => succinate	310	Lysine degradation
K00137	prr; aminobutyraldehyde dehydrogenase [EC:1.2.1.19]	ko00001	KEGG Orthology	M00956	Lysine degradation; bacteria; L-lysine => succinate	330	Arginine and proline metabolism
K00137	prr; aminobutyraldehyde dehydrogenase [EC:1.2.1.19]	ko00001	KEGG Orthology	M00956	Lysine degradation; bacteria; L-lysine => succinate	410	beta-Alanine metabolism
K00137	prr; aminobutyraldehyde dehydrogenase [EC:1.2.1.19]	ko00001	KEGG Orthology	M00956	Lysine degradation; bacteria; L-lysine => succinate	1100	Metabolic pathways
K00137	prr; aminobutyraldehyde dehydrogenase [EC:1.2.1.19]	ko00001	KEGG Orthology	M00956	Lysine degradation; bacteria; L-lysine => succinate	1120	Microbial metabolism in diverse environments
K00138	aldB; aldehyde dehydrogenase [EC:1.2.1.-]	ko00001	KEGG Orthology	NA	NA	10	Glycolysis _ Gluconeogenesis
K00138	aldB; aldehyde dehydrogenase [EC:1.2.1.-]	ko00001	KEGG Orthology	NA	NA	620	Pyruvate metabolism
K00138	aldB; aldehyde dehydrogenase [EC:1.2.1.-]	ko00001	KEGG Orthology	NA	NA	1100	Metabolic pathways
K00138	aldB; aldehyde dehydrogenase [EC:1.2.1.-]	ko00001	KEGG Orthology	NA	NA	1110	Biosynthesis of secondary metabolites
K00138	aldB; aldehyde dehydrogenase [EC:1.2.1.-]	ko00001	KEGG Orthology	NA	NA	1120	Microbial metabolism in diverse environments
K00140	mmsA, iolA, ALDH6A1; malonate-semialdehyde dehydrogenase / methylmalonate-semialdehyde dehydrogenase [EC:1.2.1.18 1.2.1.27]	ko00001	KEGG Orthology	M00013	Malonate semialdehyde pathway; propanoyl-CoA => acetyl-CoA	280	Valine; leucine and isoleucine degradation
K00140	mmsA, iolA, ALDH6A1; malonate-semialdehyde dehydrogenase / methylmalonate-semialdehyde dehydrogenase [EC:1.2.1.18 1.2.1.27]	ko00001	KEGG Orthology	M00013	Malonate semialdehyde pathway; propanoyl-CoA => acetyl-CoA	410	beta-Alanine metabolism
K00140	mmsA, iolA, ALDH6A1; malonate-semialdehyde dehydrogenase / methylmalonate-semialdehyde dehydrogenase [EC:1.2.1.18 1.2.1.27]	ko00001	KEGG Orthology	M00013	Malonate semialdehyde pathway; propanoyl-CoA => acetyl-CoA	562	Inositol phosphate metabolism
K00140	mmsA, iolA, ALDH6A1; malonate-semialdehyde dehydrogenase / methylmalonate-semialdehyde dehydrogenase [EC:1.2.1.18 1.2.1.27]	ko00001	KEGG Orthology	M00013	Malonate semialdehyde pathway; propanoyl-CoA => acetyl-CoA	640	Propanoate metabolism
K00140	mmsA, iolA, ALDH6A1; malonate-semialdehyde dehydrogenase / methylmalonate-semialdehyde dehydrogenase [EC:1.2.1.18 1.2.1.27]	ko00001	KEGG Orthology	M00013	Malonate semialdehyde pathway; propanoyl-CoA => acetyl-CoA	1100	Metabolic pathways
K00140	mmsA, iolA, ALDH6A1; malonate-semialdehyde dehydrogenase / methylmalonate-semialdehyde dehydrogenase [EC:1.2.1.18 1.2.1.27]	ko00001	KEGG Orthology	M00013	Malonate semialdehyde pathway; propanoyl-CoA => acetyl-CoA	1200	Carbon metabolism
K00145	argC; N-acetyl-gamma-glutamyl-phosphate reductase [EC:1.2.1.38]	ko00001	KEGG Orthology	M00028	Ornithine biosynthesis; glutamate => ornithine	220	Arginine biosynthesis
K00145	argC; N-acetyl-gamma-glutamyl-phosphate reductase [EC:1.2.1.38]	ko00001	KEGG Orthology	M00028	Ornithine biosynthesis; glutamate => ornithine	1100	Metabolic pathways
K00145	argC; N-acetyl-gamma-glutamyl-phosphate reductase [EC:1.2.1.38]	ko00001	KEGG Orthology	M00028	Ornithine biosynthesis; glutamate => ornithine	1110	Biosynthesis of secondary metabolites
K00145	argC; N-acetyl-gamma-glutamyl-phosphate reductase [EC:1.2.1.38]	ko00001	KEGG Orthology	M00028	Ornithine biosynthesis; glutamate => ornithine	1210	2-Oxocarboxylic acid metabolism
K00145	argC; N-acetyl-gamma-glutamyl-phosphate reductase [EC:1.2.1.38]	ko00001	KEGG Orthology	M00028	Ornithine biosynthesis; glutamate => ornithine	1230	Biosynthesis of amino acids
K00145	argC; N-acetyl-gamma-glutamyl-phosphate reductase [EC:1.2.1.38]	ko00001	KEGG Orthology	M00845	Arginine biosynthesis; glutamate => acetylcitrulline => arginine	220	Arginine biosynthesis
K00145	argC; N-acetyl-gamma-glutamyl-phosphate reductase [EC:1.2.1.38]	ko00001	KEGG Orthology	M00845	Arginine biosynthesis; glutamate => acetylcitrulline => arginine	1100	Metabolic pathways
K00145	argC; N-acetyl-gamma-glutamyl-phosphate reductase [EC:1.2.1.38]	ko00001	KEGG Orthology	M00845	Arginine biosynthesis; glutamate => acetylcitrulline => arginine	1110	Biosynthesis of secondary metabolites
K00145	argC; N-acetyl-gamma-glutamyl-phosphate reductase [EC:1.2.1.38]	ko00001	KEGG Orthology	M00845	Arginine biosynthesis; glutamate => acetylcitrulline => arginine	1210	2-Oxocarboxylic acid metabolism
K00145	argC; N-acetyl-gamma-glutamyl-phosphate reductase [EC:1.2.1.38]	ko00001	KEGG Orthology	M00845	Arginine biosynthesis; glutamate => acetylcitrulline => arginine	1230	Biosynthesis of amino acids
K00146	feaB, tynC; phenylacetaldehyde dehydrogenase [EC:1.2.1.39]	ko00001	KEGG Orthology	NA	NA	350	Tyrosine metabolism
K00146	feaB, tynC; phenylacetaldehyde dehydrogenase [EC:1.2.1.39]	ko00001	KEGG Orthology	NA	NA	360	Phenylalanine metabolism
K00146	feaB, tynC; phenylacetaldehyde dehydrogenase [EC:1.2.1.39]	ko00001	KEGG Orthology	NA	NA	643	Styrene degradation
K00146	feaB, tynC; phenylacetaldehyde dehydrogenase [EC:1.2.1.39]	ko00001	KEGG Orthology	NA	NA	1100	Metabolic pathways
K00146	feaB, tynC; phenylacetaldehyde dehydrogenase [EC:1.2.1.39]	ko00001	KEGG Orthology	NA	NA	1120	Microbial metabolism in diverse environments
K00147	proA; glutamate-5-semialdehyde dehydrogenase [EC:1.2.1.41]	ko00001	KEGG Orthology	M00015	Proline biosynthesis; glutamate => proline	330	Arginine and proline metabolism
K00147	proA; glutamate-5-semialdehyde dehydrogenase [EC:1.2.1.41]	ko00001	KEGG Orthology	M00015	Proline biosynthesis; glutamate => proline	332	Carbapenem biosynthesis
K00147	proA; glutamate-5-semialdehyde dehydrogenase [EC:1.2.1.41]	ko00001	KEGG Orthology	M00015	Proline biosynthesis; glutamate => proline	1100	Metabolic pathways
K00147	proA; glutamate-5-semialdehyde dehydrogenase [EC:1.2.1.41]	ko00001	KEGG Orthology	M00015	Proline biosynthesis; glutamate => proline	1110	Biosynthesis of secondary metabolites
K00147	proA; glutamate-5-semialdehyde dehydrogenase [EC:1.2.1.41]	ko00001	KEGG Orthology	M00015	Proline biosynthesis; glutamate => proline	1230	Biosynthesis of amino acids
K00149	ALDH9A1; aldehyde dehydrogenase family 9 member A1 [EC:1.2.1.47 1.2.1.3]	ko00001	KEGG Orthology	M00135	GABA biosynthesis; eukaryotes; putrescine => GABA	10	Glycolysis _ Gluconeogenesis
K00149	ALDH9A1; aldehyde dehydrogenase family 9 member A1 [EC:1.2.1.47 1.2.1.3]	ko00001	KEGG Orthology	M00135	GABA biosynthesis; eukaryotes; putrescine => GABA	53	Ascorbate and aldarate metabolism
K00149	ALDH9A1; aldehyde dehydrogenase family 9 member A1 [EC:1.2.1.47 1.2.1.3]	ko00001	KEGG Orthology	M00135	GABA biosynthesis; eukaryotes; putrescine => GABA	71	Fatty acid degradation
K00149	ALDH9A1; aldehyde dehydrogenase family 9 member A1 [EC:1.2.1.47 1.2.1.3]	ko00001	KEGG Orthology	M00135	GABA biosynthesis; eukaryotes; putrescine => GABA	280	Valine; leucine and isoleucine degradation
K00149	ALDH9A1; aldehyde dehydrogenase family 9 member A1 [EC:1.2.1.47 1.2.1.3]	ko00001	KEGG Orthology	M00135	GABA biosynthesis; eukaryotes; putrescine => GABA	310	Lysine degradation
K00149	ALDH9A1; aldehyde dehydrogenase family 9 member A1 [EC:1.2.1.47 1.2.1.3]	ko00001	KEGG Orthology	M00135	GABA biosynthesis; eukaryotes; putrescine => GABA	330	Arginine and proline metabolism
K00149	ALDH9A1; aldehyde dehydrogenase family 9 member A1 [EC:1.2.1.47 1.2.1.3]	ko00001	KEGG Orthology	M00135	GABA biosynthesis; eukaryotes; putrescine => GABA	340	Histidine metabolism
K00149	ALDH9A1; aldehyde dehydrogenase family 9 member A1 [EC:1.2.1.47 1.2.1.3]	ko00001	KEGG Orthology	M00135	GABA biosynthesis; eukaryotes; putrescine => GABA	380	Tryptophan metabolism
K00149	ALDH9A1; aldehyde dehydrogenase family 9 member A1 [EC:1.2.1.47 1.2.1.3]	ko00001	KEGG Orthology	M00135	GABA biosynthesis; eukaryotes; putrescine => GABA	410	beta-Alanine metabolism
K00149	ALDH9A1; aldehyde dehydrogenase family 9 member A1 [EC:1.2.1.47 1.2.1.3]	ko00001	KEGG Orthology	M00135	GABA biosynthesis; eukaryotes; putrescine => GABA	561	Glycerolipid metabolism
K00149	ALDH9A1; aldehyde dehydrogenase family 9 member A1 [EC:1.2.1.47 1.2.1.3]	ko00001	KEGG Orthology	M00135	GABA biosynthesis; eukaryotes; putrescine => GABA	620	Pyruvate metabolism
K00149	ALDH9A1; aldehyde dehydrogenase family 9 member A1 [EC:1.2.1.47 1.2.1.3]	ko00001	KEGG Orthology	M00135	GABA biosynthesis; eukaryotes; putrescine => GABA	1100	Metabolic pathways
K00149	ALDH9A1; aldehyde dehydrogenase family 9 member A1 [EC:1.2.1.47 1.2.1.3]	ko00001	KEGG Orthology	M00135	GABA biosynthesis; eukaryotes; putrescine => GABA	1110	Biosynthesis of secondary metabolites
K00149	ALDH9A1; aldehyde dehydrogenase family 9 member A1 [EC:1.2.1.47 1.2.1.3]	ko00001	KEGG Orthology	M00135	GABA biosynthesis; eukaryotes; putrescine => GABA	1120	Microbial metabolism in diverse environments
K00149	ALDH9A1; aldehyde dehydrogenase family 9 member A1 [EC:1.2.1.47 1.2.1.3]	ko00001	KEGG Orthology	M00135	GABA biosynthesis; eukaryotes; putrescine => GABA	4936	Alcoholic liver disease
K00150	gap2, gapB; glyceraldehyde-3-phosphate dehydrogenase [EC:1.2.1.59]	ko00001	KEGG Orthology	M00001	Glycolysis	10	Glycolysis _ Gluconeogenesis
K00150	gap2, gapB; glyceraldehyde-3-phosphate dehydrogenase [EC:1.2.1.59]	ko00001	KEGG Orthology	M00001	Glycolysis	710	Carbon fixation in photosynthetic organisms
K00150	gap2, gapB; glyceraldehyde-3-phosphate dehydrogenase [EC:1.2.1.59]	ko00001	KEGG Orthology	M00001	Glycolysis	1100	Metabolic pathways
K00150	gap2, gapB; glyceraldehyde-3-phosphate dehydrogenase [EC:1.2.1.59]	ko00001	KEGG Orthology	M00001	Glycolysis	1110	Biosynthesis of secondary metabolites
K00150	gap2, gapB; glyceraldehyde-3-phosphate dehydrogenase [EC:1.2.1.59]	ko00001	KEGG Orthology	M00001	Glycolysis	1120	Microbial metabolism in diverse environments
K00150	gap2, gapB; glyceraldehyde-3-phosphate dehydrogenase [EC:1.2.1.59]	ko00001	KEGG Orthology	M00001	Glycolysis	1200	Carbon metabolism
K00150	gap2, gapB; glyceraldehyde-3-phosphate dehydrogenase [EC:1.2.1.59]	ko00001	KEGG Orthology	M00001	Glycolysis	1230	Biosynthesis of amino acids
K00150	gap2, gapB; glyceraldehyde-3-phosphate dehydrogenase [EC:1.2.1.59]	ko00001	KEGG Orthology	M00002	Glycolysis; core module involving three-carbon compounds	10	Glycolysis _ Gluconeogenesis
K00150	gap2, gapB; glyceraldehyde-3-phosphate dehydrogenase [EC:1.2.1.59]	ko00001	KEGG Orthology	M00002	Glycolysis; core module involving three-carbon compounds	710	Carbon fixation in photosynthetic organisms
K00150	gap2, gapB; glyceraldehyde-3-phosphate dehydrogenase [EC:1.2.1.59]	ko00001	KEGG Orthology	M00002	Glycolysis; core module involving three-carbon compounds	1100	Metabolic pathways
K00150	gap2, gapB; glyceraldehyde-3-phosphate dehydrogenase [EC:1.2.1.59]	ko00001	KEGG Orthology	M00002	Glycolysis; core module involving three-carbon compounds	1110	Biosynthesis of secondary metabolites
K00150	gap2, gapB; glyceraldehyde-3-phosphate dehydrogenase [EC:1.2.1.59]	ko00001	KEGG Orthology	M00002	Glycolysis; core module involving three-carbon compounds	1120	Microbial metabolism in diverse environments
K00150	gap2, gapB; glyceraldehyde-3-phosphate dehydrogenase [EC:1.2.1.59]	ko00001	KEGG Orthology	M00002	Glycolysis; core module involving three-carbon compounds	1200	Carbon metabolism
K00150	gap2, gapB; glyceraldehyde-3-phosphate dehydrogenase [EC:1.2.1.59]	ko00001	KEGG Orthology	M00002	Glycolysis; core module involving three-carbon compounds	1230	Biosynthesis of amino acids
K00150	gap2, gapB; glyceraldehyde-3-phosphate dehydrogenase [EC:1.2.1.59]	ko00001	KEGG Orthology	M00003	Gluconeogenesis; oxaloacetate => fructose-6P	10	Glycolysis _ Gluconeogenesis
K00150	gap2, gapB; glyceraldehyde-3-phosphate dehydrogenase [EC:1.2.1.59]	ko00001	KEGG Orthology	M00003	Gluconeogenesis; oxaloacetate => fructose-6P	710	Carbon fixation in photosynthetic organisms
K00150	gap2, gapB; glyceraldehyde-3-phosphate dehydrogenase [EC:1.2.1.59]	ko00001	KEGG Orthology	M00003	Gluconeogenesis; oxaloacetate => fructose-6P	1100	Metabolic pathways
K00150	gap2, gapB; glyceraldehyde-3-phosphate dehydrogenase [EC:1.2.1.59]	ko00001	KEGG Orthology	M00003	Gluconeogenesis; oxaloacetate => fructose-6P	1110	Biosynthesis of secondary metabolites
K00150	gap2, gapB; glyceraldehyde-3-phosphate dehydrogenase [EC:1.2.1.59]	ko00001	KEGG Orthology	M00003	Gluconeogenesis; oxaloacetate => fructose-6P	1120	Microbial metabolism in diverse environments
K00150	gap2, gapB; glyceraldehyde-3-phosphate dehydrogenase [EC:1.2.1.59]	ko00001	KEGG Orthology	M00003	Gluconeogenesis; oxaloacetate => fructose-6P	1200	Carbon metabolism
K00150	gap2, gapB; glyceraldehyde-3-phosphate dehydrogenase [EC:1.2.1.59]	ko00001	KEGG Orthology	M00003	Gluconeogenesis; oxaloacetate => fructose-6P	1230	Biosynthesis of amino acids
K00150	gap2, gapB; glyceraldehyde-3-phosphate dehydrogenase [EC:1.2.1.59]	ko00001	KEGG Orthology	M00165	Reductive pentose phosphate cycle	10	Glycolysis _ Gluconeogenesis
K00150	gap2, gapB; glyceraldehyde-3-phosphate dehydrogenase [EC:1.2.1.59]	ko00001	KEGG Orthology	M00165	Reductive pentose phosphate cycle	710	Carbon fixation in photosynthetic organisms
K00150	gap2, gapB; glyceraldehyde-3-phosphate dehydrogenase [EC:1.2.1.59]	ko00001	KEGG Orthology	M00165	Reductive pentose phosphate cycle	1100	Metabolic pathways
K00150	gap2, gapB; glyceraldehyde-3-phosphate dehydrogenase [EC:1.2.1.59]	ko00001	KEGG Orthology	M00165	Reductive pentose phosphate cycle	1110	Biosynthesis of secondary metabolites
K00150	gap2, gapB; glyceraldehyde-3-phosphate dehydrogenase [EC:1.2.1.59]	ko00001	KEGG Orthology	M00165	Reductive pentose phosphate cycle	1120	Microbial metabolism in diverse environments
K00150	gap2, gapB; glyceraldehyde-3-phosphate dehydrogenase [EC:1.2.1.59]	ko00001	KEGG Orthology	M00165	Reductive pentose phosphate cycle	1200	Carbon metabolism
K00150	gap2, gapB; glyceraldehyde-3-phosphate dehydrogenase [EC:1.2.1.59]	ko00001	KEGG Orthology	M00165	Reductive pentose phosphate cycle	1230	Biosynthesis of amino acids
K00150	gap2, gapB; glyceraldehyde-3-phosphate dehydrogenase [EC:1.2.1.59]	ko00001	KEGG Orthology	M00166	Reductive pentose phosphate cycle; ribulose-5P => glyceraldehyde-3P	10	Glycolysis _ Gluconeogenesis
K00150	gap2, gapB; glyceraldehyde-3-phosphate dehydrogenase [EC:1.2.1.59]	ko00001	KEGG Orthology	M00166	Reductive pentose phosphate cycle; ribulose-5P => glyceraldehyde-3P	710	Carbon fixation in photosynthetic organisms
K00150	gap2, gapB; glyceraldehyde-3-phosphate dehydrogenase [EC:1.2.1.59]	ko00001	KEGG Orthology	M00166	Reductive pentose phosphate cycle; ribulose-5P => glyceraldehyde-3P	1100	Metabolic pathways
K00150	gap2, gapB; glyceraldehyde-3-phosphate dehydrogenase [EC:1.2.1.59]	ko00001	KEGG Orthology	M00166	Reductive pentose phosphate cycle; ribulose-5P => glyceraldehyde-3P	1110	Biosynthesis of secondary metabolites
K00150	gap2, gapB; glyceraldehyde-3-phosphate dehydrogenase [EC:1.2.1.59]	ko00001	KEGG Orthology	M00166	Reductive pentose phosphate cycle; ribulose-5P => glyceraldehyde-3P	1120	Microbial metabolism in diverse environments
K00150	gap2, gapB; glyceraldehyde-3-phosphate dehydrogenase [EC:1.2.1.59]	ko00001	KEGG Orthology	M00166	Reductive pentose phosphate cycle; ribulose-5P => glyceraldehyde-3P	1200	Carbon metabolism
K00150	gap2, gapB; glyceraldehyde-3-phosphate dehydrogenase [EC:1.2.1.59]	ko00001	KEGG Orthology	M00166	Reductive pentose phosphate cycle; ribulose-5P => glyceraldehyde-3P	1230	Biosynthesis of amino acids
K00156	poxB; pyruvate dehydrogenase [EC:1.2.5.1]	ko00001	KEGG Orthology	NA	NA	620	Pyruvate metabolism
K00156	poxB; pyruvate dehydrogenase [EC:1.2.5.1]	ko00001	KEGG Orthology	NA	NA	1100	Metabolic pathways
K00157	AOX; aldehyde oxidase [EC:1.2.3.1]	ko00001	KEGG Orthology	NA	NA	280	Valine; leucine and isoleucine degradation
K00157	AOX; aldehyde oxidase [EC:1.2.3.1]	ko00001	KEGG Orthology	NA	NA	350	Tyrosine metabolism
K00157	AOX; aldehyde oxidase [EC:1.2.3.1]	ko00001	KEGG Orthology	NA	NA	380	Tryptophan metabolism
K00157	AOX; aldehyde oxidase [EC:1.2.3.1]	ko00001	KEGG Orthology	NA	NA	750	Vitamin B6 metabolism
K00157	AOX; aldehyde oxidase [EC:1.2.3.1]	ko00001	KEGG Orthology	NA	NA	760	Nicotinate and nicotinamide metabolism
K00157	AOX; aldehyde oxidase [EC:1.2.3.1]	ko00001	KEGG Orthology	NA	NA	830	Retinol metabolism
K00157	AOX; aldehyde oxidase [EC:1.2.3.1]	ko00001	KEGG Orthology	NA	NA	982	Drug metabolism - cytochrome P450
K00157	AOX; aldehyde oxidase [EC:1.2.3.1]	ko00001	KEGG Orthology	NA	NA	1100	Metabolic pathways
K00157	AOX; aldehyde oxidase [EC:1.2.3.1]	ko00001	KEGG Orthology	NA	NA	1120	Microbial metabolism in diverse environments
K00157	AOX; aldehyde oxidase [EC:1.2.3.1]	ko00001	KEGG Orthology	NA	NA	4630	JAK-STAT signaling pathway
K00158	spxB, poxL; pyruvate oxidase [EC:1.2.3.3]	ko00001	KEGG Orthology	NA	NA	620	Pyruvate metabolism
K00158	spxB, poxL; pyruvate oxidase [EC:1.2.3.3]	ko00001	KEGG Orthology	NA	NA	1100	Metabolic pathways
K00161	PDHA, pdhA; pyruvate dehydrogenase E1 component subunit alpha [EC:1.2.4.1]	ko00001	KEGG Orthology	M00307	Pyruvate oxidation; pyruvate => acetyl-CoA	10	Glycolysis _ Gluconeogenesis
K00161	PDHA, pdhA; pyruvate dehydrogenase E1 component subunit alpha [EC:1.2.4.1]	ko00001	KEGG Orthology	M00307	Pyruvate oxidation; pyruvate => acetyl-CoA	20	Citrate cycle
K00161	PDHA, pdhA; pyruvate dehydrogenase E1 component subunit alpha [EC:1.2.4.1]	ko00001	KEGG Orthology	M00307	Pyruvate oxidation; pyruvate => acetyl-CoA	620	Pyruvate metabolism
K00161	PDHA, pdhA; pyruvate dehydrogenase E1 component subunit alpha [EC:1.2.4.1]	ko00001	KEGG Orthology	M00307	Pyruvate oxidation; pyruvate => acetyl-CoA	785	Lipoic acid metabolism
K00161	PDHA, pdhA; pyruvate dehydrogenase E1 component subunit alpha [EC:1.2.4.1]	ko00001	KEGG Orthology	M00307	Pyruvate oxidation; pyruvate => acetyl-CoA	1100	Metabolic pathways
K00161	PDHA, pdhA; pyruvate dehydrogenase E1 component subunit alpha [EC:1.2.4.1]	ko00001	KEGG Orthology	M00307	Pyruvate oxidation; pyruvate => acetyl-CoA	1110	Biosynthesis of secondary metabolites
K00161	PDHA, pdhA; pyruvate dehydrogenase E1 component subunit alpha [EC:1.2.4.1]	ko00001	KEGG Orthology	M00307	Pyruvate oxidation; pyruvate => acetyl-CoA	1120	Microbial metabolism in diverse environments
K00161	PDHA, pdhA; pyruvate dehydrogenase E1 component subunit alpha [EC:1.2.4.1]	ko00001	KEGG Orthology	M00307	Pyruvate oxidation; pyruvate => acetyl-CoA	1200	Carbon metabolism
K00161	PDHA, pdhA; pyruvate dehydrogenase E1 component subunit alpha [EC:1.2.4.1]	ko00001	KEGG Orthology	M00307	Pyruvate oxidation; pyruvate => acetyl-CoA	4066	HIF-1 signaling pathway
K00161	PDHA, pdhA; pyruvate dehydrogenase E1 component subunit alpha [EC:1.2.4.1]	ko00001	KEGG Orthology	M00307	Pyruvate oxidation; pyruvate => acetyl-CoA	4922	Glucagon signaling pathway
K00161	PDHA, pdhA; pyruvate dehydrogenase E1 component subunit alpha [EC:1.2.4.1]	ko00001	KEGG Orthology	M00307	Pyruvate oxidation; pyruvate => acetyl-CoA	5230	Central carbon metabolism in cancer
K00161	PDHA, pdhA; pyruvate dehydrogenase E1 component subunit alpha [EC:1.2.4.1]	ko00001	KEGG Orthology	M00307	Pyruvate oxidation; pyruvate => acetyl-CoA	5415	Diabetic cardiomyopathy
K00162	PDHB, pdhB; pyruvate dehydrogenase E1 component subunit beta [EC:1.2.4.1]	ko00001	KEGG Orthology	M00307	Pyruvate oxidation; pyruvate => acetyl-CoA	10	Glycolysis _ Gluconeogenesis
K00162	PDHB, pdhB; pyruvate dehydrogenase E1 component subunit beta [EC:1.2.4.1]	ko00001	KEGG Orthology	M00307	Pyruvate oxidation; pyruvate => acetyl-CoA	20	Citrate cycle
K00162	PDHB, pdhB; pyruvate dehydrogenase E1 component subunit beta [EC:1.2.4.1]	ko00001	KEGG Orthology	M00307	Pyruvate oxidation; pyruvate => acetyl-CoA	620	Pyruvate metabolism
K00162	PDHB, pdhB; pyruvate dehydrogenase E1 component subunit beta [EC:1.2.4.1]	ko00001	KEGG Orthology	M00307	Pyruvate oxidation; pyruvate => acetyl-CoA	785	Lipoic acid metabolism
K00162	PDHB, pdhB; pyruvate dehydrogenase E1 component subunit beta [EC:1.2.4.1]	ko00001	KEGG Orthology	M00307	Pyruvate oxidation; pyruvate => acetyl-CoA	1100	Metabolic pathways
K00162	PDHB, pdhB; pyruvate dehydrogenase E1 component subunit beta [EC:1.2.4.1]	ko00001	KEGG Orthology	M00307	Pyruvate oxidation; pyruvate => acetyl-CoA	1110	Biosynthesis of secondary metabolites
K00162	PDHB, pdhB; pyruvate dehydrogenase E1 component subunit beta [EC:1.2.4.1]	ko00001	KEGG Orthology	M00307	Pyruvate oxidation; pyruvate => acetyl-CoA	1120	Microbial metabolism in diverse environments
K00162	PDHB, pdhB; pyruvate dehydrogenase E1 component subunit beta [EC:1.2.4.1]	ko00001	KEGG Orthology	M00307	Pyruvate oxidation; pyruvate => acetyl-CoA	1200	Carbon metabolism
K00162	PDHB, pdhB; pyruvate dehydrogenase E1 component subunit beta [EC:1.2.4.1]	ko00001	KEGG Orthology	M00307	Pyruvate oxidation; pyruvate => acetyl-CoA	4066	HIF-1 signaling pathway
K00162	PDHB, pdhB; pyruvate dehydrogenase E1 component subunit beta [EC:1.2.4.1]	ko00001	KEGG Orthology	M00307	Pyruvate oxidation; pyruvate => acetyl-CoA	4922	Glucagon signaling pathway
K00162	PDHB, pdhB; pyruvate dehydrogenase E1 component subunit beta [EC:1.2.4.1]	ko00001	KEGG Orthology	M00307	Pyruvate oxidation; pyruvate => acetyl-CoA	5230	Central carbon metabolism in cancer
K00162	PDHB, pdhB; pyruvate dehydrogenase E1 component subunit beta [EC:1.2.4.1]	ko00001	KEGG Orthology	M00307	Pyruvate oxidation; pyruvate => acetyl-CoA	5415	Diabetic cardiomyopathy
K00163	aceE; pyruvate dehydrogenase E1 component [EC:1.2.4.1]	ko00001	KEGG Orthology	M00307	Pyruvate oxidation; pyruvate => acetyl-CoA	10	Glycolysis _ Gluconeogenesis
K00163	aceE; pyruvate dehydrogenase E1 component [EC:1.2.4.1]	ko00001	KEGG Orthology	M00307	Pyruvate oxidation; pyruvate => acetyl-CoA	20	Citrate cycle
K00163	aceE; pyruvate dehydrogenase E1 component [EC:1.2.4.1]	ko00001	KEGG Orthology	M00307	Pyruvate oxidation; pyruvate => acetyl-CoA	620	Pyruvate metabolism
K00163	aceE; pyruvate dehydrogenase E1 component [EC:1.2.4.1]	ko00001	KEGG Orthology	M00307	Pyruvate oxidation; pyruvate => acetyl-CoA	785	Lipoic acid metabolism
K00163	aceE; pyruvate dehydrogenase E1 component [EC:1.2.4.1]	ko00001	KEGG Orthology	M00307	Pyruvate oxidation; pyruvate => acetyl-CoA	1100	Metabolic pathways
K00163	aceE; pyruvate dehydrogenase E1 component [EC:1.2.4.1]	ko00001	KEGG Orthology	M00307	Pyruvate oxidation; pyruvate => acetyl-CoA	1110	Biosynthesis of secondary metabolites
K00163	aceE; pyruvate dehydrogenase E1 component [EC:1.2.4.1]	ko00001	KEGG Orthology	M00307	Pyruvate oxidation; pyruvate => acetyl-CoA	1120	Microbial metabolism in diverse environments
K00163	aceE; pyruvate dehydrogenase E1 component [EC:1.2.4.1]	ko00001	KEGG Orthology	M00307	Pyruvate oxidation; pyruvate => acetyl-CoA	1200	Carbon metabolism
K00164	OGDH, sucA; 2-oxoglutarate dehydrogenase E1 component [EC:1.2.4.2]	ko00001	KEGG Orthology	M00009	Citrate cycle	20	Citrate cycle
K00164	OGDH, sucA; 2-oxoglutarate dehydrogenase E1 component [EC:1.2.4.2]	ko00001	KEGG Orthology	M00009	Citrate cycle	785	Lipoic acid metabolism
K00164	OGDH, sucA; 2-oxoglutarate dehydrogenase E1 component [EC:1.2.4.2]	ko00001	KEGG Orthology	M00009	Citrate cycle	1100	Metabolic pathways
K00164	OGDH, sucA; 2-oxoglutarate dehydrogenase E1 component [EC:1.2.4.2]	ko00001	KEGG Orthology	M00009	Citrate cycle	1110	Biosynthesis of secondary metabolites
K00164	OGDH, sucA; 2-oxoglutarate dehydrogenase E1 component [EC:1.2.4.2]	ko00001	KEGG Orthology	M00009	Citrate cycle	1120	Microbial metabolism in diverse environments
K00164	OGDH, sucA; 2-oxoglutarate dehydrogenase E1 component [EC:1.2.4.2]	ko00001	KEGG Orthology	M00009	Citrate cycle	1200	Carbon metabolism
K00164	OGDH, sucA; 2-oxoglutarate dehydrogenase E1 component [EC:1.2.4.2]	ko00001	KEGG Orthology	M00011	Citrate cycle; second carbon oxidation; 2-oxoglutarate => oxaloacetate	20	Citrate cycle
K00164	OGDH, sucA; 2-oxoglutarate dehydrogenase E1 component [EC:1.2.4.2]	ko00001	KEGG Orthology	M00011	Citrate cycle; second carbon oxidation; 2-oxoglutarate => oxaloacetate	785	Lipoic acid metabolism
K00164	OGDH, sucA; 2-oxoglutarate dehydrogenase E1 component [EC:1.2.4.2]	ko00001	KEGG Orthology	M00011	Citrate cycle; second carbon oxidation; 2-oxoglutarate => oxaloacetate	1100	Metabolic pathways
K00164	OGDH, sucA; 2-oxoglutarate dehydrogenase E1 component [EC:1.2.4.2]	ko00001	KEGG Orthology	M00011	Citrate cycle; second carbon oxidation; 2-oxoglutarate => oxaloacetate	1110	Biosynthesis of secondary metabolites
K00164	OGDH, sucA; 2-oxoglutarate dehydrogenase E1 component [EC:1.2.4.2]	ko00001	KEGG Orthology	M00011	Citrate cycle; second carbon oxidation; 2-oxoglutarate => oxaloacetate	1120	Microbial metabolism in diverse environments
K00164	OGDH, sucA; 2-oxoglutarate dehydrogenase E1 component [EC:1.2.4.2]	ko00001	KEGG Orthology	M00011	Citrate cycle; second carbon oxidation; 2-oxoglutarate => oxaloacetate	1200	Carbon metabolism
K00169	porA; pyruvate ferredoxin oxidoreductase alpha subunit [EC:1.2.7.1]	ko00001	KEGG Orthology	M00173	Reductive citrate cycle	10	Glycolysis _ Gluconeogenesis
K00169	porA; pyruvate ferredoxin oxidoreductase alpha subunit [EC:1.2.7.1]	ko00001	KEGG Orthology	M00173	Reductive citrate cycle	20	Citrate cycle
K00169	porA; pyruvate ferredoxin oxidoreductase alpha subunit [EC:1.2.7.1]	ko00001	KEGG Orthology	M00173	Reductive citrate cycle	620	Pyruvate metabolism
K00169	porA; pyruvate ferredoxin oxidoreductase alpha subunit [EC:1.2.7.1]	ko00001	KEGG Orthology	M00173	Reductive citrate cycle	633	Nitrotoluene degradation
K00169	porA; pyruvate ferredoxin oxidoreductase alpha subunit [EC:1.2.7.1]	ko00001	KEGG Orthology	M00173	Reductive citrate cycle	640	Propanoate metabolism
K00169	porA; pyruvate ferredoxin oxidoreductase alpha subunit [EC:1.2.7.1]	ko00001	KEGG Orthology	M00173	Reductive citrate cycle	650	Butanoate metabolism
K00169	porA; pyruvate ferredoxin oxidoreductase alpha subunit [EC:1.2.7.1]	ko00001	KEGG Orthology	M00173	Reductive citrate cycle	680	Methane metabolism
K00169	porA; pyruvate ferredoxin oxidoreductase alpha subunit [EC:1.2.7.1]	ko00001	KEGG Orthology	M00173	Reductive citrate cycle	720	Carbon fixation pathways in prokaryotes
K00169	porA; pyruvate ferredoxin oxidoreductase alpha subunit [EC:1.2.7.1]	ko00001	KEGG Orthology	M00173	Reductive citrate cycle	1100	Metabolic pathways
K00169	porA; pyruvate ferredoxin oxidoreductase alpha subunit [EC:1.2.7.1]	ko00001	KEGG Orthology	M00173	Reductive citrate cycle	1110	Biosynthesis of secondary metabolites
K00169	porA; pyruvate ferredoxin oxidoreductase alpha subunit [EC:1.2.7.1]	ko00001	KEGG Orthology	M00173	Reductive citrate cycle	1120	Microbial metabolism in diverse environments
K00169	porA; pyruvate ferredoxin oxidoreductase alpha subunit [EC:1.2.7.1]	ko00001	KEGG Orthology	M00173	Reductive citrate cycle	1200	Carbon metabolism
K00169	porA; pyruvate ferredoxin oxidoreductase alpha subunit [EC:1.2.7.1]	ko00001	KEGG Orthology	M00307	Pyruvate oxidation; pyruvate => acetyl-CoA	10	Glycolysis _ Gluconeogenesis
K00169	porA; pyruvate ferredoxin oxidoreductase alpha subunit [EC:1.2.7.1]	ko00001	KEGG Orthology	M00307	Pyruvate oxidation; pyruvate => acetyl-CoA	20	Citrate cycle
K00169	porA; pyruvate ferredoxin oxidoreductase alpha subunit [EC:1.2.7.1]	ko00001	KEGG Orthology	M00307	Pyruvate oxidation; pyruvate => acetyl-CoA	620	Pyruvate metabolism
K00169	porA; pyruvate ferredoxin oxidoreductase alpha subunit [EC:1.2.7.1]	ko00001	KEGG Orthology	M00307	Pyruvate oxidation; pyruvate => acetyl-CoA	633	Nitrotoluene degradation
K00169	porA; pyruvate ferredoxin oxidoreductase alpha subunit [EC:1.2.7.1]	ko00001	KEGG Orthology	M00307	Pyruvate oxidation; pyruvate => acetyl-CoA	640	Propanoate metabolism
K00169	porA; pyruvate ferredoxin oxidoreductase alpha subunit [EC:1.2.7.1]	ko00001	KEGG Orthology	M00307	Pyruvate oxidation; pyruvate => acetyl-CoA	650	Butanoate metabolism
K00169	porA; pyruvate ferredoxin oxidoreductase alpha subunit [EC:1.2.7.1]	ko00001	KEGG Orthology	M00307	Pyruvate oxidation; pyruvate => acetyl-CoA	680	Methane metabolism
K00169	porA; pyruvate ferredoxin oxidoreductase alpha subunit [EC:1.2.7.1]	ko00001	KEGG Orthology	M00307	Pyruvate oxidation; pyruvate => acetyl-CoA	720	Carbon fixation pathways in prokaryotes
K00169	porA; pyruvate ferredoxin oxidoreductase alpha subunit [EC:1.2.7.1]	ko00001	KEGG Orthology	M00307	Pyruvate oxidation; pyruvate => acetyl-CoA	1100	Metabolic pathways
K00169	porA; pyruvate ferredoxin oxidoreductase alpha subunit [EC:1.2.7.1]	ko00001	KEGG Orthology	M00307	Pyruvate oxidation; pyruvate => acetyl-CoA	1110	Biosynthesis of secondary metabolites
K00169	porA; pyruvate ferredoxin oxidoreductase alpha subunit [EC:1.2.7.1]	ko00001	KEGG Orthology	M00307	Pyruvate oxidation; pyruvate => acetyl-CoA	1120	Microbial metabolism in diverse environments
K00169	porA; pyruvate ferredoxin oxidoreductase alpha subunit [EC:1.2.7.1]	ko00001	KEGG Orthology	M00307	Pyruvate oxidation; pyruvate => acetyl-CoA	1200	Carbon metabolism
K00169	porA; pyruvate ferredoxin oxidoreductase alpha subunit [EC:1.2.7.1]	ko00001	KEGG Orthology	M00374	Dicarboxylate-hydroxybutyrate cycle	10	Glycolysis _ Gluconeogenesis
K00169	porA; pyruvate ferredoxin oxidoreductase alpha subunit [EC:1.2.7.1]	ko00001	KEGG Orthology	M00374	Dicarboxylate-hydroxybutyrate cycle	20	Citrate cycle
K00169	porA; pyruvate ferredoxin oxidoreductase alpha subunit [EC:1.2.7.1]	ko00001	KEGG Orthology	M00374	Dicarboxylate-hydroxybutyrate cycle	620	Pyruvate metabolism
K00169	porA; pyruvate ferredoxin oxidoreductase alpha subunit [EC:1.2.7.1]	ko00001	KEGG Orthology	M00374	Dicarboxylate-hydroxybutyrate cycle	633	Nitrotoluene degradation
K00169	porA; pyruvate ferredoxin oxidoreductase alpha subunit [EC:1.2.7.1]	ko00001	KEGG Orthology	M00374	Dicarboxylate-hydroxybutyrate cycle	640	Propanoate metabolism
K00169	porA; pyruvate ferredoxin oxidoreductase alpha subunit [EC:1.2.7.1]	ko00001	KEGG Orthology	M00374	Dicarboxylate-hydroxybutyrate cycle	650	Butanoate metabolism
K00169	porA; pyruvate ferredoxin oxidoreductase alpha subunit [EC:1.2.7.1]	ko00001	KEGG Orthology	M00374	Dicarboxylate-hydroxybutyrate cycle	680	Methane metabolism
K00169	porA; pyruvate ferredoxin oxidoreductase alpha subunit [EC:1.2.7.1]	ko00001	KEGG Orthology	M00374	Dicarboxylate-hydroxybutyrate cycle	720	Carbon fixation pathways in prokaryotes
K00169	porA; pyruvate ferredoxin oxidoreductase alpha subunit [EC:1.2.7.1]	ko00001	KEGG Orthology	M00374	Dicarboxylate-hydroxybutyrate cycle	1100	Metabolic pathways
K00169	porA; pyruvate ferredoxin oxidoreductase alpha subunit [EC:1.2.7.1]	ko00001	KEGG Orthology	M00374	Dicarboxylate-hydroxybutyrate cycle	1110	Biosynthesis of secondary metabolites
K00169	porA; pyruvate ferredoxin oxidoreductase alpha subunit [EC:1.2.7.1]	ko00001	KEGG Orthology	M00374	Dicarboxylate-hydroxybutyrate cycle	1120	Microbial metabolism in diverse environments
K00169	porA; pyruvate ferredoxin oxidoreductase alpha subunit [EC:1.2.7.1]	ko00001	KEGG Orthology	M00374	Dicarboxylate-hydroxybutyrate cycle	1200	Carbon metabolism
K00169	porA; pyruvate ferredoxin oxidoreductase alpha subunit [EC:1.2.7.1]	ko00001	KEGG Orthology	M00620	Incomplete reductive citrate cycle; acetyl-CoA => oxoglutarate	10	Glycolysis _ Gluconeogenesis
K00169	porA; pyruvate ferredoxin oxidoreductase alpha subunit [EC:1.2.7.1]	ko00001	KEGG Orthology	M00620	Incomplete reductive citrate cycle; acetyl-CoA => oxoglutarate	20	Citrate cycle
K00169	porA; pyruvate ferredoxin oxidoreductase alpha subunit [EC:1.2.7.1]	ko00001	KEGG Orthology	M00620	Incomplete reductive citrate cycle; acetyl-CoA => oxoglutarate	620	Pyruvate metabolism
K00169	porA; pyruvate ferredoxin oxidoreductase alpha subunit [EC:1.2.7.1]	ko00001	KEGG Orthology	M00620	Incomplete reductive citrate cycle; acetyl-CoA => oxoglutarate	633	Nitrotoluene degradation
K00169	porA; pyruvate ferredoxin oxidoreductase alpha subunit [EC:1.2.7.1]	ko00001	KEGG Orthology	M00620	Incomplete reductive citrate cycle; acetyl-CoA => oxoglutarate	640	Propanoate metabolism
K00169	porA; pyruvate ferredoxin oxidoreductase alpha subunit [EC:1.2.7.1]	ko00001	KEGG Orthology	M00620	Incomplete reductive citrate cycle; acetyl-CoA => oxoglutarate	650	Butanoate metabolism
K00169	porA; pyruvate ferredoxin oxidoreductase alpha subunit [EC:1.2.7.1]	ko00001	KEGG Orthology	M00620	Incomplete reductive citrate cycle; acetyl-CoA => oxoglutarate	680	Methane metabolism
K00169	porA; pyruvate ferredoxin oxidoreductase alpha subunit [EC:1.2.7.1]	ko00001	KEGG Orthology	M00620	Incomplete reductive citrate cycle; acetyl-CoA => oxoglutarate	720	Carbon fixation pathways in prokaryotes
K00169	porA; pyruvate ferredoxin oxidoreductase alpha subunit [EC:1.2.7.1]	ko00001	KEGG Orthology	M00620	Incomplete reductive citrate cycle; acetyl-CoA => oxoglutarate	1100	Metabolic pathways
K00169	porA; pyruvate ferredoxin oxidoreductase alpha subunit [EC:1.2.7.1]	ko00001	KEGG Orthology	M00620	Incomplete reductive citrate cycle; acetyl-CoA => oxoglutarate	1110	Biosynthesis of secondary metabolites
K00169	porA; pyruvate ferredoxin oxidoreductase alpha subunit [EC:1.2.7.1]	ko00001	KEGG Orthology	M00620	Incomplete reductive citrate cycle; acetyl-CoA => oxoglutarate	1120	Microbial metabolism in diverse environments
K00169	porA; pyruvate ferredoxin oxidoreductase alpha subunit [EC:1.2.7.1]	ko00001	KEGG Orthology	M00620	Incomplete reductive citrate cycle; acetyl-CoA => oxoglutarate	1200	Carbon metabolism
K00170	porB; pyruvate ferredoxin oxidoreductase beta subunit [EC:1.2.7.1]	ko00001	KEGG Orthology	M00173	Reductive citrate cycle	10	Glycolysis _ Gluconeogenesis
K00170	porB; pyruvate ferredoxin oxidoreductase beta subunit [EC:1.2.7.1]	ko00001	KEGG Orthology	M00173	Reductive citrate cycle	20	Citrate cycle
K00170	porB; pyruvate ferredoxin oxidoreductase beta subunit [EC:1.2.7.1]	ko00001	KEGG Orthology	M00173	Reductive citrate cycle	620	Pyruvate metabolism
K00170	porB; pyruvate ferredoxin oxidoreductase beta subunit [EC:1.2.7.1]	ko00001	KEGG Orthology	M00173	Reductive citrate cycle	633	Nitrotoluene degradation
K00170	porB; pyruvate ferredoxin oxidoreductase beta subunit [EC:1.2.7.1]	ko00001	KEGG Orthology	M00173	Reductive citrate cycle	640	Propanoate metabolism
K00170	porB; pyruvate ferredoxin oxidoreductase beta subunit [EC:1.2.7.1]	ko00001	KEGG Orthology	M00173	Reductive citrate cycle	650	Butanoate metabolism
K00170	porB; pyruvate ferredoxin oxidoreductase beta subunit [EC:1.2.7.1]	ko00001	KEGG Orthology	M00173	Reductive citrate cycle	680	Methane metabolism
K00170	porB; pyruvate ferredoxin oxidoreductase beta subunit [EC:1.2.7.1]	ko00001	KEGG Orthology	M00173	Reductive citrate cycle	720	Carbon fixation pathways in prokaryotes
K00170	porB; pyruvate ferredoxin oxidoreductase beta subunit [EC:1.2.7.1]	ko00001	KEGG Orthology	M00173	Reductive citrate cycle	1100	Metabolic pathways
K00170	porB; pyruvate ferredoxin oxidoreductase beta subunit [EC:1.2.7.1]	ko00001	KEGG Orthology	M00173	Reductive citrate cycle	1110	Biosynthesis of secondary metabolites
K00170	porB; pyruvate ferredoxin oxidoreductase beta subunit [EC:1.2.7.1]	ko00001	KEGG Orthology	M00173	Reductive citrate cycle	1120	Microbial metabolism in diverse environments
K00170	porB; pyruvate ferredoxin oxidoreductase beta subunit [EC:1.2.7.1]	ko00001	KEGG Orthology	M00173	Reductive citrate cycle	1200	Carbon metabolism
K00170	porB; pyruvate ferredoxin oxidoreductase beta subunit [EC:1.2.7.1]	ko00001	KEGG Orthology	M00307	Pyruvate oxidation; pyruvate => acetyl-CoA	10	Glycolysis _ Gluconeogenesis
K00170	porB; pyruvate ferredoxin oxidoreductase beta subunit [EC:1.2.7.1]	ko00001	KEGG Orthology	M00307	Pyruvate oxidation; pyruvate => acetyl-CoA	20	Citrate cycle
K00170	porB; pyruvate ferredoxin oxidoreductase beta subunit [EC:1.2.7.1]	ko00001	KEGG Orthology	M00307	Pyruvate oxidation; pyruvate => acetyl-CoA	620	Pyruvate metabolism
K00170	porB; pyruvate ferredoxin oxidoreductase beta subunit [EC:1.2.7.1]	ko00001	KEGG Orthology	M00307	Pyruvate oxidation; pyruvate => acetyl-CoA	633	Nitrotoluene degradation
K00170	porB; pyruvate ferredoxin oxidoreductase beta subunit [EC:1.2.7.1]	ko00001	KEGG Orthology	M00307	Pyruvate oxidation; pyruvate => acetyl-CoA	640	Propanoate metabolism
K00170	porB; pyruvate ferredoxin oxidoreductase beta subunit [EC:1.2.7.1]	ko00001	KEGG Orthology	M00307	Pyruvate oxidation; pyruvate => acetyl-CoA	650	Butanoate metabolism
K00170	porB; pyruvate ferredoxin oxidoreductase beta subunit [EC:1.2.7.1]	ko00001	KEGG Orthology	M00307	Pyruvate oxidation; pyruvate => acetyl-CoA	680	Methane metabolism
K00170	porB; pyruvate ferredoxin oxidoreductase beta subunit [EC:1.2.7.1]	ko00001	KEGG Orthology	M00307	Pyruvate oxidation; pyruvate => acetyl-CoA	720	Carbon fixation pathways in prokaryotes
K00170	porB; pyruvate ferredoxin oxidoreductase beta subunit [EC:1.2.7.1]	ko00001	KEGG Orthology	M00307	Pyruvate oxidation; pyruvate => acetyl-CoA	1100	Metabolic pathways
K00170	porB; pyruvate ferredoxin oxidoreductase beta subunit [EC:1.2.7.1]	ko00001	KEGG Orthology	M00307	Pyruvate oxidation; pyruvate => acetyl-CoA	1110	Biosynthesis of secondary metabolites
K00170	porB; pyruvate ferredoxin oxidoreductase beta subunit [EC:1.2.7.1]	ko00001	KEGG Orthology	M00307	Pyruvate oxidation; pyruvate => acetyl-CoA	1120	Microbial metabolism in diverse environments
K00170	porB; pyruvate ferredoxin oxidoreductase beta subunit [EC:1.2.7.1]	ko00001	KEGG Orthology	M00307	Pyruvate oxidation; pyruvate => acetyl-CoA	1200	Carbon metabolism
K00170	porB; pyruvate ferredoxin oxidoreductase beta subunit [EC:1.2.7.1]	ko00001	KEGG Orthology	M00374	Dicarboxylate-hydroxybutyrate cycle	10	Glycolysis _ Gluconeogenesis
K00170	porB; pyruvate ferredoxin oxidoreductase beta subunit [EC:1.2.7.1]	ko00001	KEGG Orthology	M00374	Dicarboxylate-hydroxybutyrate cycle	20	Citrate cycle
K00170	porB; pyruvate ferredoxin oxidoreductase beta subunit [EC:1.2.7.1]	ko00001	KEGG Orthology	M00374	Dicarboxylate-hydroxybutyrate cycle	620	Pyruvate metabolism
K00170	porB; pyruvate ferredoxin oxidoreductase beta subunit [EC:1.2.7.1]	ko00001	KEGG Orthology	M00374	Dicarboxylate-hydroxybutyrate cycle	633	Nitrotoluene degradation
K00170	porB; pyruvate ferredoxin oxidoreductase beta subunit [EC:1.2.7.1]	ko00001	KEGG Orthology	M00374	Dicarboxylate-hydroxybutyrate cycle	640	Propanoate metabolism
K00170	porB; pyruvate ferredoxin oxidoreductase beta subunit [EC:1.2.7.1]	ko00001	KEGG Orthology	M00374	Dicarboxylate-hydroxybutyrate cycle	650	Butanoate metabolism
K00170	porB; pyruvate ferredoxin oxidoreductase beta subunit [EC:1.2.7.1]	ko00001	KEGG Orthology	M00374	Dicarboxylate-hydroxybutyrate cycle	680	Methane metabolism
K00170	porB; pyruvate ferredoxin oxidoreductase beta subunit [EC:1.2.7.1]	ko00001	KEGG Orthology	M00374	Dicarboxylate-hydroxybutyrate cycle	720	Carbon fixation pathways in prokaryotes
K00170	porB; pyruvate ferredoxin oxidoreductase beta subunit [EC:1.2.7.1]	ko00001	KEGG Orthology	M00374	Dicarboxylate-hydroxybutyrate cycle	1100	Metabolic pathways
K00170	porB; pyruvate ferredoxin oxidoreductase beta subunit [EC:1.2.7.1]	ko00001	KEGG Orthology	M00374	Dicarboxylate-hydroxybutyrate cycle	1110	Biosynthesis of secondary metabolites
K00170	porB; pyruvate ferredoxin oxidoreductase beta subunit [EC:1.2.7.1]	ko00001	KEGG Orthology	M00374	Dicarboxylate-hydroxybutyrate cycle	1120	Microbial metabolism in diverse environments
K00170	porB; pyruvate ferredoxin oxidoreductase beta subunit [EC:1.2.7.1]	ko00001	KEGG Orthology	M00374	Dicarboxylate-hydroxybutyrate cycle	1200	Carbon metabolism
K00170	porB; pyruvate ferredoxin oxidoreductase beta subunit [EC:1.2.7.1]	ko00001	KEGG Orthology	M00620	Incomplete reductive citrate cycle; acetyl-CoA => oxoglutarate	10	Glycolysis _ Gluconeogenesis
K00170	porB; pyruvate ferredoxin oxidoreductase beta subunit [EC:1.2.7.1]	ko00001	KEGG Orthology	M00620	Incomplete reductive citrate cycle; acetyl-CoA => oxoglutarate	20	Citrate cycle
K00170	porB; pyruvate ferredoxin oxidoreductase beta subunit [EC:1.2.7.1]	ko00001	KEGG Orthology	M00620	Incomplete reductive citrate cycle; acetyl-CoA => oxoglutarate	620	Pyruvate metabolism
K00170	porB; pyruvate ferredoxin oxidoreductase beta subunit [EC:1.2.7.1]	ko00001	KEGG Orthology	M00620	Incomplete reductive citrate cycle; acetyl-CoA => oxoglutarate	633	Nitrotoluene degradation
K00170	porB; pyruvate ferredoxin oxidoreductase beta subunit [EC:1.2.7.1]	ko00001	KEGG Orthology	M00620	Incomplete reductive citrate cycle; acetyl-CoA => oxoglutarate	640	Propanoate metabolism
K00170	porB; pyruvate ferredoxin oxidoreductase beta subunit [EC:1.2.7.1]	ko00001	KEGG Orthology	M00620	Incomplete reductive citrate cycle; acetyl-CoA => oxoglutarate	650	Butanoate metabolism
K00170	porB; pyruvate ferredoxin oxidoreductase beta subunit [EC:1.2.7.1]	ko00001	KEGG Orthology	M00620	Incomplete reductive citrate cycle; acetyl-CoA => oxoglutarate	680	Methane metabolism
K00170	porB; pyruvate ferredoxin oxidoreductase beta subunit [EC:1.2.7.1]	ko00001	KEGG Orthology	M00620	Incomplete reductive citrate cycle; acetyl-CoA => oxoglutarate	720	Carbon fixation pathways in prokaryotes
K00170	porB; pyruvate ferredoxin oxidoreductase beta subunit [EC:1.2.7.1]	ko00001	KEGG Orthology	M00620	Incomplete reductive citrate cycle; acetyl-CoA => oxoglutarate	1100	Metabolic pathways
K00170	porB; pyruvate ferredoxin oxidoreductase beta subunit [EC:1.2.7.1]	ko00001	KEGG Orthology	M00620	Incomplete reductive citrate cycle; acetyl-CoA => oxoglutarate	1110	Biosynthesis of secondary metabolites
K00170	porB; pyruvate ferredoxin oxidoreductase beta subunit [EC:1.2.7.1]	ko00001	KEGG Orthology	M00620	Incomplete reductive citrate cycle; acetyl-CoA => oxoglutarate	1120	Microbial metabolism in diverse environments
K00170	porB; pyruvate ferredoxin oxidoreductase beta subunit [EC:1.2.7.1]	ko00001	KEGG Orthology	M00620	Incomplete reductive citrate cycle; acetyl-CoA => oxoglutarate	1200	Carbon metabolism
K00171	porD; pyruvate ferredoxin oxidoreductase delta subunit [EC:1.2.7.1]	ko00001	KEGG Orthology	M00173	Reductive citrate cycle	10	Glycolysis _ Gluconeogenesis
K00171	porD; pyruvate ferredoxin oxidoreductase delta subunit [EC:1.2.7.1]	ko00001	KEGG Orthology	M00173	Reductive citrate cycle	20	Citrate cycle
K00171	porD; pyruvate ferredoxin oxidoreductase delta subunit [EC:1.2.7.1]	ko00001	KEGG Orthology	M00173	Reductive citrate cycle	620	Pyruvate metabolism
K00171	porD; pyruvate ferredoxin oxidoreductase delta subunit [EC:1.2.7.1]	ko00001	KEGG Orthology	M00173	Reductive citrate cycle	633	Nitrotoluene degradation
K00171	porD; pyruvate ferredoxin oxidoreductase delta subunit [EC:1.2.7.1]	ko00001	KEGG Orthology	M00173	Reductive citrate cycle	640	Propanoate metabolism
K00171	porD; pyruvate ferredoxin oxidoreductase delta subunit [EC:1.2.7.1]	ko00001	KEGG Orthology	M00173	Reductive citrate cycle	650	Butanoate metabolism
K00171	porD; pyruvate ferredoxin oxidoreductase delta subunit [EC:1.2.7.1]	ko00001	KEGG Orthology	M00173	Reductive citrate cycle	680	Methane metabolism
K00171	porD; pyruvate ferredoxin oxidoreductase delta subunit [EC:1.2.7.1]	ko00001	KEGG Orthology	M00173	Reductive citrate cycle	720	Carbon fixation pathways in prokaryotes
K00171	porD; pyruvate ferredoxin oxidoreductase delta subunit [EC:1.2.7.1]	ko00001	KEGG Orthology	M00173	Reductive citrate cycle	1100	Metabolic pathways
K00171	porD; pyruvate ferredoxin oxidoreductase delta subunit [EC:1.2.7.1]	ko00001	KEGG Orthology	M00173	Reductive citrate cycle	1110	Biosynthesis of secondary metabolites
K00171	porD; pyruvate ferredoxin oxidoreductase delta subunit [EC:1.2.7.1]	ko00001	KEGG Orthology	M00173	Reductive citrate cycle	1120	Microbial metabolism in diverse environments
K00171	porD; pyruvate ferredoxin oxidoreductase delta subunit [EC:1.2.7.1]	ko00001	KEGG Orthology	M00173	Reductive citrate cycle	1200	Carbon metabolism
K00171	porD; pyruvate ferredoxin oxidoreductase delta subunit [EC:1.2.7.1]	ko00001	KEGG Orthology	M00307	Pyruvate oxidation; pyruvate => acetyl-CoA	10	Glycolysis _ Gluconeogenesis
K00171	porD; pyruvate ferredoxin oxidoreductase delta subunit [EC:1.2.7.1]	ko00001	KEGG Orthology	M00307	Pyruvate oxidation; pyruvate => acetyl-CoA	20	Citrate cycle
K00171	porD; pyruvate ferredoxin oxidoreductase delta subunit [EC:1.2.7.1]	ko00001	KEGG Orthology	M00307	Pyruvate oxidation; pyruvate => acetyl-CoA	620	Pyruvate metabolism
K00171	porD; pyruvate ferredoxin oxidoreductase delta subunit [EC:1.2.7.1]	ko00001	KEGG Orthology	M00307	Pyruvate oxidation; pyruvate => acetyl-CoA	633	Nitrotoluene degradation
K00171	porD; pyruvate ferredoxin oxidoreductase delta subunit [EC:1.2.7.1]	ko00001	KEGG Orthology	M00307	Pyruvate oxidation; pyruvate => acetyl-CoA	640	Propanoate metabolism
K00171	porD; pyruvate ferredoxin oxidoreductase delta subunit [EC:1.2.7.1]	ko00001	KEGG Orthology	M00307	Pyruvate oxidation; pyruvate => acetyl-CoA	650	Butanoate metabolism
K00171	porD; pyruvate ferredoxin oxidoreductase delta subunit [EC:1.2.7.1]	ko00001	KEGG Orthology	M00307	Pyruvate oxidation; pyruvate => acetyl-CoA	680	Methane metabolism
K00171	porD; pyruvate ferredoxin oxidoreductase delta subunit [EC:1.2.7.1]	ko00001	KEGG Orthology	M00307	Pyruvate oxidation; pyruvate => acetyl-CoA	720	Carbon fixation pathways in prokaryotes
K00171	porD; pyruvate ferredoxin oxidoreductase delta subunit [EC:1.2.7.1]	ko00001	KEGG Orthology	M00307	Pyruvate oxidation; pyruvate => acetyl-CoA	1100	Metabolic pathways
K00171	porD; pyruvate ferredoxin oxidoreductase delta subunit [EC:1.2.7.1]	ko00001	KEGG Orthology	M00307	Pyruvate oxidation; pyruvate => acetyl-CoA	1110	Biosynthesis of secondary metabolites
K00171	porD; pyruvate ferredoxin oxidoreductase delta subunit [EC:1.2.7.1]	ko00001	KEGG Orthology	M00307	Pyruvate oxidation; pyruvate => acetyl-CoA	1120	Microbial metabolism in diverse environments
K00171	porD; pyruvate ferredoxin oxidoreductase delta subunit [EC:1.2.7.1]	ko00001	KEGG Orthology	M00307	Pyruvate oxidation; pyruvate => acetyl-CoA	1200	Carbon metabolism
K00171	porD; pyruvate ferredoxin oxidoreductase delta subunit [EC:1.2.7.1]	ko00001	KEGG Orthology	M00374	Dicarboxylate-hydroxybutyrate cycle	10	Glycolysis _ Gluconeogenesis
K00171	porD; pyruvate ferredoxin oxidoreductase delta subunit [EC:1.2.7.1]	ko00001	KEGG Orthology	M00374	Dicarboxylate-hydroxybutyrate cycle	20	Citrate cycle
K00171	porD; pyruvate ferredoxin oxidoreductase delta subunit [EC:1.2.7.1]	ko00001	KEGG Orthology	M00374	Dicarboxylate-hydroxybutyrate cycle	620	Pyruvate metabolism
K00171	porD; pyruvate ferredoxin oxidoreductase delta subunit [EC:1.2.7.1]	ko00001	KEGG Orthology	M00374	Dicarboxylate-hydroxybutyrate cycle	633	Nitrotoluene degradation
K00171	porD; pyruvate ferredoxin oxidoreductase delta subunit [EC:1.2.7.1]	ko00001	KEGG Orthology	M00374	Dicarboxylate-hydroxybutyrate cycle	640	Propanoate metabolism
K00171	porD; pyruvate ferredoxin oxidoreductase delta subunit [EC:1.2.7.1]	ko00001	KEGG Orthology	M00374	Dicarboxylate-hydroxybutyrate cycle	650	Butanoate metabolism
K00171	porD; pyruvate ferredoxin oxidoreductase delta subunit [EC:1.2.7.1]	ko00001	KEGG Orthology	M00374	Dicarboxylate-hydroxybutyrate cycle	680	Methane metabolism
K00171	porD; pyruvate ferredoxin oxidoreductase delta subunit [EC:1.2.7.1]	ko00001	KEGG Orthology	M00374	Dicarboxylate-hydroxybutyrate cycle	720	Carbon fixation pathways in prokaryotes
K00171	porD; pyruvate ferredoxin oxidoreductase delta subunit [EC:1.2.7.1]	ko00001	KEGG Orthology	M00374	Dicarboxylate-hydroxybutyrate cycle	1100	Metabolic pathways
K00171	porD; pyruvate ferredoxin oxidoreductase delta subunit [EC:1.2.7.1]	ko00001	KEGG Orthology	M00374	Dicarboxylate-hydroxybutyrate cycle	1110	Biosynthesis of secondary metabolites
K00171	porD; pyruvate ferredoxin oxidoreductase delta subunit [EC:1.2.7.1]	ko00001	KEGG Orthology	M00374	Dicarboxylate-hydroxybutyrate cycle	1120	Microbial metabolism in diverse environments
K00171	porD; pyruvate ferredoxin oxidoreductase delta subunit [EC:1.2.7.1]	ko00001	KEGG Orthology	M00374	Dicarboxylate-hydroxybutyrate cycle	1200	Carbon metabolism
K00171	porD; pyruvate ferredoxin oxidoreductase delta subunit [EC:1.2.7.1]	ko00001	KEGG Orthology	M00620	Incomplete reductive citrate cycle; acetyl-CoA => oxoglutarate	10	Glycolysis _ Gluconeogenesis
K00171	porD; pyruvate ferredoxin oxidoreductase delta subunit [EC:1.2.7.1]	ko00001	KEGG Orthology	M00620	Incomplete reductive citrate cycle; acetyl-CoA => oxoglutarate	20	Citrate cycle
K00171	porD; pyruvate ferredoxin oxidoreductase delta subunit [EC:1.2.7.1]	ko00001	KEGG Orthology	M00620	Incomplete reductive citrate cycle; acetyl-CoA => oxoglutarate	620	Pyruvate metabolism
K00171	porD; pyruvate ferredoxin oxidoreductase delta subunit [EC:1.2.7.1]	ko00001	KEGG Orthology	M00620	Incomplete reductive citrate cycle; acetyl-CoA => oxoglutarate	633	Nitrotoluene degradation
K00171	porD; pyruvate ferredoxin oxidoreductase delta subunit [EC:1.2.7.1]	ko00001	KEGG Orthology	M00620	Incomplete reductive citrate cycle; acetyl-CoA => oxoglutarate	640	Propanoate metabolism
K00171	porD; pyruvate ferredoxin oxidoreductase delta subunit [EC:1.2.7.1]	ko00001	KEGG Orthology	M00620	Incomplete reductive citrate cycle; acetyl-CoA => oxoglutarate	650	Butanoate metabolism
K00171	porD; pyruvate ferredoxin oxidoreductase delta subunit [EC:1.2.7.1]	ko00001	KEGG Orthology	M00620	Incomplete reductive citrate cycle; acetyl-CoA => oxoglutarate	680	Methane metabolism
K00171	porD; pyruvate ferredoxin oxidoreductase delta subunit [EC:1.2.7.1]	ko00001	KEGG Orthology	M00620	Incomplete reductive citrate cycle; acetyl-CoA => oxoglutarate	720	Carbon fixation pathways in prokaryotes
K00171	porD; pyruvate ferredoxin oxidoreductase delta subunit [EC:1.2.7.1]	ko00001	KEGG Orthology	M00620	Incomplete reductive citrate cycle; acetyl-CoA => oxoglutarate	1100	Metabolic pathways
K00171	porD; pyruvate ferredoxin oxidoreductase delta subunit [EC:1.2.7.1]	ko00001	KEGG Orthology	M00620	Incomplete reductive citrate cycle; acetyl-CoA => oxoglutarate	1110	Biosynthesis of secondary metabolites
K00171	porD; pyruvate ferredoxin oxidoreductase delta subunit [EC:1.2.7.1]	ko00001	KEGG Orthology	M00620	Incomplete reductive citrate cycle; acetyl-CoA => oxoglutarate	1120	Microbial metabolism in diverse environments
K00171	porD; pyruvate ferredoxin oxidoreductase delta subunit [EC:1.2.7.1]	ko00001	KEGG Orthology	M00620	Incomplete reductive citrate cycle; acetyl-CoA => oxoglutarate	1200	Carbon metabolism
K00172	porC, porG; pyruvate ferredoxin oxidoreductase gamma subunit [EC:1.2.7.1]	ko00001	KEGG Orthology	M00173	Reductive citrate cycle	10	Glycolysis _ Gluconeogenesis
K00172	porC, porG; pyruvate ferredoxin oxidoreductase gamma subunit [EC:1.2.7.1]	ko00001	KEGG Orthology	M00173	Reductive citrate cycle	20	Citrate cycle
K00172	porC, porG; pyruvate ferredoxin oxidoreductase gamma subunit [EC:1.2.7.1]	ko00001	KEGG Orthology	M00173	Reductive citrate cycle	620	Pyruvate metabolism
K00172	porC, porG; pyruvate ferredoxin oxidoreductase gamma subunit [EC:1.2.7.1]	ko00001	KEGG Orthology	M00173	Reductive citrate cycle	633	Nitrotoluene degradation
K00172	porC, porG; pyruvate ferredoxin oxidoreductase gamma subunit [EC:1.2.7.1]	ko00001	KEGG Orthology	M00173	Reductive citrate cycle	640	Propanoate metabolism
K00172	porC, porG; pyruvate ferredoxin oxidoreductase gamma subunit [EC:1.2.7.1]	ko00001	KEGG Orthology	M00173	Reductive citrate cycle	650	Butanoate metabolism
K00172	porC, porG; pyruvate ferredoxin oxidoreductase gamma subunit [EC:1.2.7.1]	ko00001	KEGG Orthology	M00173	Reductive citrate cycle	680	Methane metabolism
K00172	porC, porG; pyruvate ferredoxin oxidoreductase gamma subunit [EC:1.2.7.1]	ko00001	KEGG Orthology	M00173	Reductive citrate cycle	720	Carbon fixation pathways in prokaryotes
K00172	porC, porG; pyruvate ferredoxin oxidoreductase gamma subunit [EC:1.2.7.1]	ko00001	KEGG Orthology	M00173	Reductive citrate cycle	1100	Metabolic pathways
K00172	porC, porG; pyruvate ferredoxin oxidoreductase gamma subunit [EC:1.2.7.1]	ko00001	KEGG Orthology	M00173	Reductive citrate cycle	1110	Biosynthesis of secondary metabolites
K00172	porC, porG; pyruvate ferredoxin oxidoreductase gamma subunit [EC:1.2.7.1]	ko00001	KEGG Orthology	M00173	Reductive citrate cycle	1120	Microbial metabolism in diverse environments
K00172	porC, porG; pyruvate ferredoxin oxidoreductase gamma subunit [EC:1.2.7.1]	ko00001	KEGG Orthology	M00173	Reductive citrate cycle	1200	Carbon metabolism
K00172	porC, porG; pyruvate ferredoxin oxidoreductase gamma subunit [EC:1.2.7.1]	ko00001	KEGG Orthology	M00307	Pyruvate oxidation; pyruvate => acetyl-CoA	10	Glycolysis _ Gluconeogenesis
K00172	porC, porG; pyruvate ferredoxin oxidoreductase gamma subunit [EC:1.2.7.1]	ko00001	KEGG Orthology	M00307	Pyruvate oxidation; pyruvate => acetyl-CoA	20	Citrate cycle
K00172	porC, porG; pyruvate ferredoxin oxidoreductase gamma subunit [EC:1.2.7.1]	ko00001	KEGG Orthology	M00307	Pyruvate oxidation; pyruvate => acetyl-CoA	620	Pyruvate metabolism
K00172	porC, porG; pyruvate ferredoxin oxidoreductase gamma subunit [EC:1.2.7.1]	ko00001	KEGG Orthology	M00307	Pyruvate oxidation; pyruvate => acetyl-CoA	633	Nitrotoluene degradation
K00172	porC, porG; pyruvate ferredoxin oxidoreductase gamma subunit [EC:1.2.7.1]	ko00001	KEGG Orthology	M00307	Pyruvate oxidation; pyruvate => acetyl-CoA	640	Propanoate metabolism
K00172	porC, porG; pyruvate ferredoxin oxidoreductase gamma subunit [EC:1.2.7.1]	ko00001	KEGG Orthology	M00307	Pyruvate oxidation; pyruvate => acetyl-CoA	650	Butanoate metabolism
K00172	porC, porG; pyruvate ferredoxin oxidoreductase gamma subunit [EC:1.2.7.1]	ko00001	KEGG Orthology	M00307	Pyruvate oxidation; pyruvate => acetyl-CoA	680	Methane metabolism
K00172	porC, porG; pyruvate ferredoxin oxidoreductase gamma subunit [EC:1.2.7.1]	ko00001	KEGG Orthology	M00307	Pyruvate oxidation; pyruvate => acetyl-CoA	720	Carbon fixation pathways in prokaryotes
K00172	porC, porG; pyruvate ferredoxin oxidoreductase gamma subunit [EC:1.2.7.1]	ko00001	KEGG Orthology	M00307	Pyruvate oxidation; pyruvate => acetyl-CoA	1100	Metabolic pathways
K00172	porC, porG; pyruvate ferredoxin oxidoreductase gamma subunit [EC:1.2.7.1]	ko00001	KEGG Orthology	M00307	Pyruvate oxidation; pyruvate => acetyl-CoA	1110	Biosynthesis of secondary metabolites
K00172	porC, porG; pyruvate ferredoxin oxidoreductase gamma subunit [EC:1.2.7.1]	ko00001	KEGG Orthology	M00307	Pyruvate oxidation; pyruvate => acetyl-CoA	1120	Microbial metabolism in diverse environments
K00172	porC, porG; pyruvate ferredoxin oxidoreductase gamma subunit [EC:1.2.7.1]	ko00001	KEGG Orthology	M00307	Pyruvate oxidation; pyruvate => acetyl-CoA	1200	Carbon metabolism
K00172	porC, porG; pyruvate ferredoxin oxidoreductase gamma subunit [EC:1.2.7.1]	ko00001	KEGG Orthology	M00374	Dicarboxylate-hydroxybutyrate cycle	10	Glycolysis _ Gluconeogenesis
K00172	porC, porG; pyruvate ferredoxin oxidoreductase gamma subunit [EC:1.2.7.1]	ko00001	KEGG Orthology	M00374	Dicarboxylate-hydroxybutyrate cycle	20	Citrate cycle
K00172	porC, porG; pyruvate ferredoxin oxidoreductase gamma subunit [EC:1.2.7.1]	ko00001	KEGG Orthology	M00374	Dicarboxylate-hydroxybutyrate cycle	620	Pyruvate metabolism
K00172	porC, porG; pyruvate ferredoxin oxidoreductase gamma subunit [EC:1.2.7.1]	ko00001	KEGG Orthology	M00374	Dicarboxylate-hydroxybutyrate cycle	633	Nitrotoluene degradation
K00172	porC, porG; pyruvate ferredoxin oxidoreductase gamma subunit [EC:1.2.7.1]	ko00001	KEGG Orthology	M00374	Dicarboxylate-hydroxybutyrate cycle	640	Propanoate metabolism
K00172	porC, porG; pyruvate ferredoxin oxidoreductase gamma subunit [EC:1.2.7.1]	ko00001	KEGG Orthology	M00374	Dicarboxylate-hydroxybutyrate cycle	650	Butanoate metabolism
K00172	porC, porG; pyruvate ferredoxin oxidoreductase gamma subunit [EC:1.2.7.1]	ko00001	KEGG Orthology	M00374	Dicarboxylate-hydroxybutyrate cycle	680	Methane metabolism
K00172	porC, porG; pyruvate ferredoxin oxidoreductase gamma subunit [EC:1.2.7.1]	ko00001	KEGG Orthology	M00374	Dicarboxylate-hydroxybutyrate cycle	720	Carbon fixation pathways in prokaryotes
K00172	porC, porG; pyruvate ferredoxin oxidoreductase gamma subunit [EC:1.2.7.1]	ko00001	KEGG Orthology	M00374	Dicarboxylate-hydroxybutyrate cycle	1100	Metabolic pathways
K00172	porC, porG; pyruvate ferredoxin oxidoreductase gamma subunit [EC:1.2.7.1]	ko00001	KEGG Orthology	M00374	Dicarboxylate-hydroxybutyrate cycle	1110	Biosynthesis of secondary metabolites
K00172	porC, porG; pyruvate ferredoxin oxidoreductase gamma subunit [EC:1.2.7.1]	ko00001	KEGG Orthology	M00374	Dicarboxylate-hydroxybutyrate cycle	1120	Microbial metabolism in diverse environments
K00172	porC, porG; pyruvate ferredoxin oxidoreductase gamma subunit [EC:1.2.7.1]	ko00001	KEGG Orthology	M00374	Dicarboxylate-hydroxybutyrate cycle	1200	Carbon metabolism
K00172	porC, porG; pyruvate ferredoxin oxidoreductase gamma subunit [EC:1.2.7.1]	ko00001	KEGG Orthology	M00620	Incomplete reductive citrate cycle; acetyl-CoA => oxoglutarate	10	Glycolysis _ Gluconeogenesis
K00172	porC, porG; pyruvate ferredoxin oxidoreductase gamma subunit [EC:1.2.7.1]	ko00001	KEGG Orthology	M00620	Incomplete reductive citrate cycle; acetyl-CoA => oxoglutarate	20	Citrate cycle
K00172	porC, porG; pyruvate ferredoxin oxidoreductase gamma subunit [EC:1.2.7.1]	ko00001	KEGG Orthology	M00620	Incomplete reductive citrate cycle; acetyl-CoA => oxoglutarate	620	Pyruvate metabolism
K00172	porC, porG; pyruvate ferredoxin oxidoreductase gamma subunit [EC:1.2.7.1]	ko00001	KEGG Orthology	M00620	Incomplete reductive citrate cycle; acetyl-CoA => oxoglutarate	633	Nitrotoluene degradation
K00172	porC, porG; pyruvate ferredoxin oxidoreductase gamma subunit [EC:1.2.7.1]	ko00001	KEGG Orthology	M00620	Incomplete reductive citrate cycle; acetyl-CoA => oxoglutarate	640	Propanoate metabolism
K00172	porC, porG; pyruvate ferredoxin oxidoreductase gamma subunit [EC:1.2.7.1]	ko00001	KEGG Orthology	M00620	Incomplete reductive citrate cycle; acetyl-CoA => oxoglutarate	650	Butanoate metabolism
K00172	porC, porG; pyruvate ferredoxin oxidoreductase gamma subunit [EC:1.2.7.1]	ko00001	KEGG Orthology	M00620	Incomplete reductive citrate cycle; acetyl-CoA => oxoglutarate	680	Methane metabolism
K00172	porC, porG; pyruvate ferredoxin oxidoreductase gamma subunit [EC:1.2.7.1]	ko00001	KEGG Orthology	M00620	Incomplete reductive citrate cycle; acetyl-CoA => oxoglutarate	720	Carbon fixation pathways in prokaryotes
K00172	porC, porG; pyruvate ferredoxin oxidoreductase gamma subunit [EC:1.2.7.1]	ko00001	KEGG Orthology	M00620	Incomplete reductive citrate cycle; acetyl-CoA => oxoglutarate	1100	Metabolic pathways
K00172	porC, porG; pyruvate ferredoxin oxidoreductase gamma subunit [EC:1.2.7.1]	ko00001	KEGG Orthology	M00620	Incomplete reductive citrate cycle; acetyl-CoA => oxoglutarate	1110	Biosynthesis of secondary metabolites
K00172	porC, porG; pyruvate ferredoxin oxidoreductase gamma subunit [EC:1.2.7.1]	ko00001	KEGG Orthology	M00620	Incomplete reductive citrate cycle; acetyl-CoA => oxoglutarate	1120	Microbial metabolism in diverse environments
K00172	porC, porG; pyruvate ferredoxin oxidoreductase gamma subunit [EC:1.2.7.1]	ko00001	KEGG Orthology	M00620	Incomplete reductive citrate cycle; acetyl-CoA => oxoglutarate	1200	Carbon metabolism
K00174	korA, oorA, oforA; 2-oxoglutarate/2-oxoacid ferredoxin oxidoreductase subunit alpha [EC:1.2.7.3 1.2.7.11]	ko00001	KEGG Orthology	M00009	Citrate cycle	10	Glycolysis _ Gluconeogenesis
K00174	korA, oorA, oforA; 2-oxoglutarate/2-oxoacid ferredoxin oxidoreductase subunit alpha [EC:1.2.7.3 1.2.7.11]	ko00001	KEGG Orthology	M00009	Citrate cycle	20	Citrate cycle
K00174	korA, oorA, oforA; 2-oxoglutarate/2-oxoacid ferredoxin oxidoreductase subunit alpha [EC:1.2.7.3 1.2.7.11]	ko00001	KEGG Orthology	M00009	Citrate cycle	620	Pyruvate metabolism
K00174	korA, oorA, oforA; 2-oxoglutarate/2-oxoacid ferredoxin oxidoreductase subunit alpha [EC:1.2.7.3 1.2.7.11]	ko00001	KEGG Orthology	M00009	Citrate cycle	650	Butanoate metabolism
K00174	korA, oorA, oforA; 2-oxoglutarate/2-oxoacid ferredoxin oxidoreductase subunit alpha [EC:1.2.7.3 1.2.7.11]	ko00001	KEGG Orthology	M00009	Citrate cycle	720	Carbon fixation pathways in prokaryotes
K00174	korA, oorA, oforA; 2-oxoglutarate/2-oxoacid ferredoxin oxidoreductase subunit alpha [EC:1.2.7.3 1.2.7.11]	ko00001	KEGG Orthology	M00009	Citrate cycle	1100	Metabolic pathways
K00174	korA, oorA, oforA; 2-oxoglutarate/2-oxoacid ferredoxin oxidoreductase subunit alpha [EC:1.2.7.3 1.2.7.11]	ko00001	KEGG Orthology	M00009	Citrate cycle	1110	Biosynthesis of secondary metabolites
K00174	korA, oorA, oforA; 2-oxoglutarate/2-oxoacid ferredoxin oxidoreductase subunit alpha [EC:1.2.7.3 1.2.7.11]	ko00001	KEGG Orthology	M00009	Citrate cycle	1120	Microbial metabolism in diverse environments
K00174	korA, oorA, oforA; 2-oxoglutarate/2-oxoacid ferredoxin oxidoreductase subunit alpha [EC:1.2.7.3 1.2.7.11]	ko00001	KEGG Orthology	M00009	Citrate cycle	1200	Carbon metabolism
K00174	korA, oorA, oforA; 2-oxoglutarate/2-oxoacid ferredoxin oxidoreductase subunit alpha [EC:1.2.7.3 1.2.7.11]	ko00001	KEGG Orthology	M00011	Citrate cycle; second carbon oxidation; 2-oxoglutarate => oxaloacetate	10	Glycolysis _ Gluconeogenesis
K00174	korA, oorA, oforA; 2-oxoglutarate/2-oxoacid ferredoxin oxidoreductase subunit alpha [EC:1.2.7.3 1.2.7.11]	ko00001	KEGG Orthology	M00011	Citrate cycle; second carbon oxidation; 2-oxoglutarate => oxaloacetate	20	Citrate cycle
K00174	korA, oorA, oforA; 2-oxoglutarate/2-oxoacid ferredoxin oxidoreductase subunit alpha [EC:1.2.7.3 1.2.7.11]	ko00001	KEGG Orthology	M00011	Citrate cycle; second carbon oxidation; 2-oxoglutarate => oxaloacetate	620	Pyruvate metabolism
K00174	korA, oorA, oforA; 2-oxoglutarate/2-oxoacid ferredoxin oxidoreductase subunit alpha [EC:1.2.7.3 1.2.7.11]	ko00001	KEGG Orthology	M00011	Citrate cycle; second carbon oxidation; 2-oxoglutarate => oxaloacetate	650	Butanoate metabolism
K00174	korA, oorA, oforA; 2-oxoglutarate/2-oxoacid ferredoxin oxidoreductase subunit alpha [EC:1.2.7.3 1.2.7.11]	ko00001	KEGG Orthology	M00011	Citrate cycle; second carbon oxidation; 2-oxoglutarate => oxaloacetate	720	Carbon fixation pathways in prokaryotes
K00174	korA, oorA, oforA; 2-oxoglutarate/2-oxoacid ferredoxin oxidoreductase subunit alpha [EC:1.2.7.3 1.2.7.11]	ko00001	KEGG Orthology	M00011	Citrate cycle; second carbon oxidation; 2-oxoglutarate => oxaloacetate	1100	Metabolic pathways
K00174	korA, oorA, oforA; 2-oxoglutarate/2-oxoacid ferredoxin oxidoreductase subunit alpha [EC:1.2.7.3 1.2.7.11]	ko00001	KEGG Orthology	M00011	Citrate cycle; second carbon oxidation; 2-oxoglutarate => oxaloacetate	1110	Biosynthesis of secondary metabolites
K00174	korA, oorA, oforA; 2-oxoglutarate/2-oxoacid ferredoxin oxidoreductase subunit alpha [EC:1.2.7.3 1.2.7.11]	ko00001	KEGG Orthology	M00011	Citrate cycle; second carbon oxidation; 2-oxoglutarate => oxaloacetate	1120	Microbial metabolism in diverse environments
K00174	korA, oorA, oforA; 2-oxoglutarate/2-oxoacid ferredoxin oxidoreductase subunit alpha [EC:1.2.7.3 1.2.7.11]	ko00001	KEGG Orthology	M00011	Citrate cycle; second carbon oxidation; 2-oxoglutarate => oxaloacetate	1200	Carbon metabolism
K00174	korA, oorA, oforA; 2-oxoglutarate/2-oxoacid ferredoxin oxidoreductase subunit alpha [EC:1.2.7.3 1.2.7.11]	ko00001	KEGG Orthology	M00173	Reductive citrate cycle	10	Glycolysis _ Gluconeogenesis
K00174	korA, oorA, oforA; 2-oxoglutarate/2-oxoacid ferredoxin oxidoreductase subunit alpha [EC:1.2.7.3 1.2.7.11]	ko00001	KEGG Orthology	M00173	Reductive citrate cycle	20	Citrate cycle
K00174	korA, oorA, oforA; 2-oxoglutarate/2-oxoacid ferredoxin oxidoreductase subunit alpha [EC:1.2.7.3 1.2.7.11]	ko00001	KEGG Orthology	M00173	Reductive citrate cycle	620	Pyruvate metabolism
K00174	korA, oorA, oforA; 2-oxoglutarate/2-oxoacid ferredoxin oxidoreductase subunit alpha [EC:1.2.7.3 1.2.7.11]	ko00001	KEGG Orthology	M00173	Reductive citrate cycle	650	Butanoate metabolism
K00174	korA, oorA, oforA; 2-oxoglutarate/2-oxoacid ferredoxin oxidoreductase subunit alpha [EC:1.2.7.3 1.2.7.11]	ko00001	KEGG Orthology	M00173	Reductive citrate cycle	720	Carbon fixation pathways in prokaryotes
K00174	korA, oorA, oforA; 2-oxoglutarate/2-oxoacid ferredoxin oxidoreductase subunit alpha [EC:1.2.7.3 1.2.7.11]	ko00001	KEGG Orthology	M00173	Reductive citrate cycle	1100	Metabolic pathways
K00174	korA, oorA, oforA; 2-oxoglutarate/2-oxoacid ferredoxin oxidoreductase subunit alpha [EC:1.2.7.3 1.2.7.11]	ko00001	KEGG Orthology	M00173	Reductive citrate cycle	1110	Biosynthesis of secondary metabolites
K00174	korA, oorA, oforA; 2-oxoglutarate/2-oxoacid ferredoxin oxidoreductase subunit alpha [EC:1.2.7.3 1.2.7.11]	ko00001	KEGG Orthology	M00173	Reductive citrate cycle	1120	Microbial metabolism in diverse environments
K00174	korA, oorA, oforA; 2-oxoglutarate/2-oxoacid ferredoxin oxidoreductase subunit alpha [EC:1.2.7.3 1.2.7.11]	ko00001	KEGG Orthology	M00173	Reductive citrate cycle	1200	Carbon metabolism
K00174	korA, oorA, oforA; 2-oxoglutarate/2-oxoacid ferredoxin oxidoreductase subunit alpha [EC:1.2.7.3 1.2.7.11]	ko00001	KEGG Orthology	M00620	Incomplete reductive citrate cycle; acetyl-CoA => oxoglutarate	10	Glycolysis _ Gluconeogenesis
K00174	korA, oorA, oforA; 2-oxoglutarate/2-oxoacid ferredoxin oxidoreductase subunit alpha [EC:1.2.7.3 1.2.7.11]	ko00001	KEGG Orthology	M00620	Incomplete reductive citrate cycle; acetyl-CoA => oxoglutarate	20	Citrate cycle
K00174	korA, oorA, oforA; 2-oxoglutarate/2-oxoacid ferredoxin oxidoreductase subunit alpha [EC:1.2.7.3 1.2.7.11]	ko00001	KEGG Orthology	M00620	Incomplete reductive citrate cycle; acetyl-CoA => oxoglutarate	620	Pyruvate metabolism
K00174	korA, oorA, oforA; 2-oxoglutarate/2-oxoacid ferredoxin oxidoreductase subunit alpha [EC:1.2.7.3 1.2.7.11]	ko00001	KEGG Orthology	M00620	Incomplete reductive citrate cycle; acetyl-CoA => oxoglutarate	650	Butanoate metabolism
K00174	korA, oorA, oforA; 2-oxoglutarate/2-oxoacid ferredoxin oxidoreductase subunit alpha [EC:1.2.7.3 1.2.7.11]	ko00001	KEGG Orthology	M00620	Incomplete reductive citrate cycle; acetyl-CoA => oxoglutarate	720	Carbon fixation pathways in prokaryotes
K00174	korA, oorA, oforA; 2-oxoglutarate/2-oxoacid ferredoxin oxidoreductase subunit alpha [EC:1.2.7.3 1.2.7.11]	ko00001	KEGG Orthology	M00620	Incomplete reductive citrate cycle; acetyl-CoA => oxoglutarate	1100	Metabolic pathways
K00174	korA, oorA, oforA; 2-oxoglutarate/2-oxoacid ferredoxin oxidoreductase subunit alpha [EC:1.2.7.3 1.2.7.11]	ko00001	KEGG Orthology	M00620	Incomplete reductive citrate cycle; acetyl-CoA => oxoglutarate	1110	Biosynthesis of secondary metabolites
K00174	korA, oorA, oforA; 2-oxoglutarate/2-oxoacid ferredoxin oxidoreductase subunit alpha [EC:1.2.7.3 1.2.7.11]	ko00001	KEGG Orthology	M00620	Incomplete reductive citrate cycle; acetyl-CoA => oxoglutarate	1120	Microbial metabolism in diverse environments
K00174	korA, oorA, oforA; 2-oxoglutarate/2-oxoacid ferredoxin oxidoreductase subunit alpha [EC:1.2.7.3 1.2.7.11]	ko00001	KEGG Orthology	M00620	Incomplete reductive citrate cycle; acetyl-CoA => oxoglutarate	1200	Carbon metabolism
K00175	korB, oorB, oforB; 2-oxoglutarate/2-oxoacid ferredoxin oxidoreductase subunit beta [EC:1.2.7.3 1.2.7.11]	ko00001	KEGG Orthology	M00009	Citrate cycle	10	Glycolysis _ Gluconeogenesis
K00175	korB, oorB, oforB; 2-oxoglutarate/2-oxoacid ferredoxin oxidoreductase subunit beta [EC:1.2.7.3 1.2.7.11]	ko00001	KEGG Orthology	M00009	Citrate cycle	20	Citrate cycle
K00175	korB, oorB, oforB; 2-oxoglutarate/2-oxoacid ferredoxin oxidoreductase subunit beta [EC:1.2.7.3 1.2.7.11]	ko00001	KEGG Orthology	M00009	Citrate cycle	620	Pyruvate metabolism
K00175	korB, oorB, oforB; 2-oxoglutarate/2-oxoacid ferredoxin oxidoreductase subunit beta [EC:1.2.7.3 1.2.7.11]	ko00001	KEGG Orthology	M00009	Citrate cycle	650	Butanoate metabolism
K00175	korB, oorB, oforB; 2-oxoglutarate/2-oxoacid ferredoxin oxidoreductase subunit beta [EC:1.2.7.3 1.2.7.11]	ko00001	KEGG Orthology	M00009	Citrate cycle	720	Carbon fixation pathways in prokaryotes
K00175	korB, oorB, oforB; 2-oxoglutarate/2-oxoacid ferredoxin oxidoreductase subunit beta [EC:1.2.7.3 1.2.7.11]	ko00001	KEGG Orthology	M00009	Citrate cycle	1100	Metabolic pathways
K00175	korB, oorB, oforB; 2-oxoglutarate/2-oxoacid ferredoxin oxidoreductase subunit beta [EC:1.2.7.3 1.2.7.11]	ko00001	KEGG Orthology	M00009	Citrate cycle	1110	Biosynthesis of secondary metabolites
K00175	korB, oorB, oforB; 2-oxoglutarate/2-oxoacid ferredoxin oxidoreductase subunit beta [EC:1.2.7.3 1.2.7.11]	ko00001	KEGG Orthology	M00009	Citrate cycle	1120	Microbial metabolism in diverse environments
K00175	korB, oorB, oforB; 2-oxoglutarate/2-oxoacid ferredoxin oxidoreductase subunit beta [EC:1.2.7.3 1.2.7.11]	ko00001	KEGG Orthology	M00009	Citrate cycle	1200	Carbon metabolism
K00175	korB, oorB, oforB; 2-oxoglutarate/2-oxoacid ferredoxin oxidoreductase subunit beta [EC:1.2.7.3 1.2.7.11]	ko00001	KEGG Orthology	M00011	Citrate cycle; second carbon oxidation; 2-oxoglutarate => oxaloacetate	10	Glycolysis _ Gluconeogenesis
K00175	korB, oorB, oforB; 2-oxoglutarate/2-oxoacid ferredoxin oxidoreductase subunit beta [EC:1.2.7.3 1.2.7.11]	ko00001	KEGG Orthology	M00011	Citrate cycle; second carbon oxidation; 2-oxoglutarate => oxaloacetate	20	Citrate cycle
K00175	korB, oorB, oforB; 2-oxoglutarate/2-oxoacid ferredoxin oxidoreductase subunit beta [EC:1.2.7.3 1.2.7.11]	ko00001	KEGG Orthology	M00011	Citrate cycle; second carbon oxidation; 2-oxoglutarate => oxaloacetate	620	Pyruvate metabolism
K00175	korB, oorB, oforB; 2-oxoglutarate/2-oxoacid ferredoxin oxidoreductase subunit beta [EC:1.2.7.3 1.2.7.11]	ko00001	KEGG Orthology	M00011	Citrate cycle; second carbon oxidation; 2-oxoglutarate => oxaloacetate	650	Butanoate metabolism
K00175	korB, oorB, oforB; 2-oxoglutarate/2-oxoacid ferredoxin oxidoreductase subunit beta [EC:1.2.7.3 1.2.7.11]	ko00001	KEGG Orthology	M00011	Citrate cycle; second carbon oxidation; 2-oxoglutarate => oxaloacetate	720	Carbon fixation pathways in prokaryotes
K00175	korB, oorB, oforB; 2-oxoglutarate/2-oxoacid ferredoxin oxidoreductase subunit beta [EC:1.2.7.3 1.2.7.11]	ko00001	KEGG Orthology	M00011	Citrate cycle; second carbon oxidation; 2-oxoglutarate => oxaloacetate	1100	Metabolic pathways
K00175	korB, oorB, oforB; 2-oxoglutarate/2-oxoacid ferredoxin oxidoreductase subunit beta [EC:1.2.7.3 1.2.7.11]	ko00001	KEGG Orthology	M00011	Citrate cycle; second carbon oxidation; 2-oxoglutarate => oxaloacetate	1110	Biosynthesis of secondary metabolites
K00175	korB, oorB, oforB; 2-oxoglutarate/2-oxoacid ferredoxin oxidoreductase subunit beta [EC:1.2.7.3 1.2.7.11]	ko00001	KEGG Orthology	M00011	Citrate cycle; second carbon oxidation; 2-oxoglutarate => oxaloacetate	1120	Microbial metabolism in diverse environments
K00175	korB, oorB, oforB; 2-oxoglutarate/2-oxoacid ferredoxin oxidoreductase subunit beta [EC:1.2.7.3 1.2.7.11]	ko00001	KEGG Orthology	M00011	Citrate cycle; second carbon oxidation; 2-oxoglutarate => oxaloacetate	1200	Carbon metabolism
K00175	korB, oorB, oforB; 2-oxoglutarate/2-oxoacid ferredoxin oxidoreductase subunit beta [EC:1.2.7.3 1.2.7.11]	ko00001	KEGG Orthology	M00173	Reductive citrate cycle	10	Glycolysis _ Gluconeogenesis
K00175	korB, oorB, oforB; 2-oxoglutarate/2-oxoacid ferredoxin oxidoreductase subunit beta [EC:1.2.7.3 1.2.7.11]	ko00001	KEGG Orthology	M00173	Reductive citrate cycle	20	Citrate cycle
K00175	korB, oorB, oforB; 2-oxoglutarate/2-oxoacid ferredoxin oxidoreductase subunit beta [EC:1.2.7.3 1.2.7.11]	ko00001	KEGG Orthology	M00173	Reductive citrate cycle	620	Pyruvate metabolism
K00175	korB, oorB, oforB; 2-oxoglutarate/2-oxoacid ferredoxin oxidoreductase subunit beta [EC:1.2.7.3 1.2.7.11]	ko00001	KEGG Orthology	M00173	Reductive citrate cycle	650	Butanoate metabolism
K00175	korB, oorB, oforB; 2-oxoglutarate/2-oxoacid ferredoxin oxidoreductase subunit beta [EC:1.2.7.3 1.2.7.11]	ko00001	KEGG Orthology	M00173	Reductive citrate cycle	720	Carbon fixation pathways in prokaryotes
K00175	korB, oorB, oforB; 2-oxoglutarate/2-oxoacid ferredoxin oxidoreductase subunit beta [EC:1.2.7.3 1.2.7.11]	ko00001	KEGG Orthology	M00173	Reductive citrate cycle	1100	Metabolic pathways
K00175	korB, oorB, oforB; 2-oxoglutarate/2-oxoacid ferredoxin oxidoreductase subunit beta [EC:1.2.7.3 1.2.7.11]	ko00001	KEGG Orthology	M00173	Reductive citrate cycle	1110	Biosynthesis of secondary metabolites
K00175	korB, oorB, oforB; 2-oxoglutarate/2-oxoacid ferredoxin oxidoreductase subunit beta [EC:1.2.7.3 1.2.7.11]	ko00001	KEGG Orthology	M00173	Reductive citrate cycle	1120	Microbial metabolism in diverse environments
K00175	korB, oorB, oforB; 2-oxoglutarate/2-oxoacid ferredoxin oxidoreductase subunit beta [EC:1.2.7.3 1.2.7.11]	ko00001	KEGG Orthology	M00173	Reductive citrate cycle	1200	Carbon metabolism
K00175	korB, oorB, oforB; 2-oxoglutarate/2-oxoacid ferredoxin oxidoreductase subunit beta [EC:1.2.7.3 1.2.7.11]	ko00001	KEGG Orthology	M00620	Incomplete reductive citrate cycle; acetyl-CoA => oxoglutarate	10	Glycolysis _ Gluconeogenesis
K00175	korB, oorB, oforB; 2-oxoglutarate/2-oxoacid ferredoxin oxidoreductase subunit beta [EC:1.2.7.3 1.2.7.11]	ko00001	KEGG Orthology	M00620	Incomplete reductive citrate cycle; acetyl-CoA => oxoglutarate	20	Citrate cycle
K00175	korB, oorB, oforB; 2-oxoglutarate/2-oxoacid ferredoxin oxidoreductase subunit beta [EC:1.2.7.3 1.2.7.11]	ko00001	KEGG Orthology	M00620	Incomplete reductive citrate cycle; acetyl-CoA => oxoglutarate	620	Pyruvate metabolism
K00175	korB, oorB, oforB; 2-oxoglutarate/2-oxoacid ferredoxin oxidoreductase subunit beta [EC:1.2.7.3 1.2.7.11]	ko00001	KEGG Orthology	M00620	Incomplete reductive citrate cycle; acetyl-CoA => oxoglutarate	650	Butanoate metabolism
K00175	korB, oorB, oforB; 2-oxoglutarate/2-oxoacid ferredoxin oxidoreductase subunit beta [EC:1.2.7.3 1.2.7.11]	ko00001	KEGG Orthology	M00620	Incomplete reductive citrate cycle; acetyl-CoA => oxoglutarate	720	Carbon fixation pathways in prokaryotes
K00175	korB, oorB, oforB; 2-oxoglutarate/2-oxoacid ferredoxin oxidoreductase subunit beta [EC:1.2.7.3 1.2.7.11]	ko00001	KEGG Orthology	M00620	Incomplete reductive citrate cycle; acetyl-CoA => oxoglutarate	1100	Metabolic pathways
K00175	korB, oorB, oforB; 2-oxoglutarate/2-oxoacid ferredoxin oxidoreductase subunit beta [EC:1.2.7.3 1.2.7.11]	ko00001	KEGG Orthology	M00620	Incomplete reductive citrate cycle; acetyl-CoA => oxoglutarate	1110	Biosynthesis of secondary metabolites
K00175	korB, oorB, oforB; 2-oxoglutarate/2-oxoacid ferredoxin oxidoreductase subunit beta [EC:1.2.7.3 1.2.7.11]	ko00001	KEGG Orthology	M00620	Incomplete reductive citrate cycle; acetyl-CoA => oxoglutarate	1120	Microbial metabolism in diverse environments
K00175	korB, oorB, oforB; 2-oxoglutarate/2-oxoacid ferredoxin oxidoreductase subunit beta [EC:1.2.7.3 1.2.7.11]	ko00001	KEGG Orthology	M00620	Incomplete reductive citrate cycle; acetyl-CoA => oxoglutarate	1200	Carbon metabolism
K00176	korD, oorD; 2-oxoglutarate ferredoxin oxidoreductase subunit delta [EC:1.2.7.3]	ko00001	KEGG Orthology	M00009	Citrate cycle	20	Citrate cycle
K00176	korD, oorD; 2-oxoglutarate ferredoxin oxidoreductase subunit delta [EC:1.2.7.3]	ko00001	KEGG Orthology	M00009	Citrate cycle	720	Carbon fixation pathways in prokaryotes
K00176	korD, oorD; 2-oxoglutarate ferredoxin oxidoreductase subunit delta [EC:1.2.7.3]	ko00001	KEGG Orthology	M00009	Citrate cycle	1100	Metabolic pathways
K00176	korD, oorD; 2-oxoglutarate ferredoxin oxidoreductase subunit delta [EC:1.2.7.3]	ko00001	KEGG Orthology	M00009	Citrate cycle	1110	Biosynthesis of secondary metabolites
K00176	korD, oorD; 2-oxoglutarate ferredoxin oxidoreductase subunit delta [EC:1.2.7.3]	ko00001	KEGG Orthology	M00009	Citrate cycle	1120	Microbial metabolism in diverse environments
K00176	korD, oorD; 2-oxoglutarate ferredoxin oxidoreductase subunit delta [EC:1.2.7.3]	ko00001	KEGG Orthology	M00009	Citrate cycle	1200	Carbon metabolism
K00176	korD, oorD; 2-oxoglutarate ferredoxin oxidoreductase subunit delta [EC:1.2.7.3]	ko00001	KEGG Orthology	M00011	Citrate cycle; second carbon oxidation; 2-oxoglutarate => oxaloacetate	20	Citrate cycle
K00176	korD, oorD; 2-oxoglutarate ferredoxin oxidoreductase subunit delta [EC:1.2.7.3]	ko00001	KEGG Orthology	M00011	Citrate cycle; second carbon oxidation; 2-oxoglutarate => oxaloacetate	720	Carbon fixation pathways in prokaryotes
K00176	korD, oorD; 2-oxoglutarate ferredoxin oxidoreductase subunit delta [EC:1.2.7.3]	ko00001	KEGG Orthology	M00011	Citrate cycle; second carbon oxidation; 2-oxoglutarate => oxaloacetate	1100	Metabolic pathways
K00176	korD, oorD; 2-oxoglutarate ferredoxin oxidoreductase subunit delta [EC:1.2.7.3]	ko00001	KEGG Orthology	M00011	Citrate cycle; second carbon oxidation; 2-oxoglutarate => oxaloacetate	1110	Biosynthesis of secondary metabolites
K00176	korD, oorD; 2-oxoglutarate ferredoxin oxidoreductase subunit delta [EC:1.2.7.3]	ko00001	KEGG Orthology	M00011	Citrate cycle; second carbon oxidation; 2-oxoglutarate => oxaloacetate	1120	Microbial metabolism in diverse environments
K00176	korD, oorD; 2-oxoglutarate ferredoxin oxidoreductase subunit delta [EC:1.2.7.3]	ko00001	KEGG Orthology	M00011	Citrate cycle; second carbon oxidation; 2-oxoglutarate => oxaloacetate	1200	Carbon metabolism
K00176	korD, oorD; 2-oxoglutarate ferredoxin oxidoreductase subunit delta [EC:1.2.7.3]	ko00001	KEGG Orthology	M00173	Reductive citrate cycle	20	Citrate cycle
K00176	korD, oorD; 2-oxoglutarate ferredoxin oxidoreductase subunit delta [EC:1.2.7.3]	ko00001	KEGG Orthology	M00173	Reductive citrate cycle	720	Carbon fixation pathways in prokaryotes
K00176	korD, oorD; 2-oxoglutarate ferredoxin oxidoreductase subunit delta [EC:1.2.7.3]	ko00001	KEGG Orthology	M00173	Reductive citrate cycle	1100	Metabolic pathways
K00176	korD, oorD; 2-oxoglutarate ferredoxin oxidoreductase subunit delta [EC:1.2.7.3]	ko00001	KEGG Orthology	M00173	Reductive citrate cycle	1110	Biosynthesis of secondary metabolites
K00176	korD, oorD; 2-oxoglutarate ferredoxin oxidoreductase subunit delta [EC:1.2.7.3]	ko00001	KEGG Orthology	M00173	Reductive citrate cycle	1120	Microbial metabolism in diverse environments
K00176	korD, oorD; 2-oxoglutarate ferredoxin oxidoreductase subunit delta [EC:1.2.7.3]	ko00001	KEGG Orthology	M00173	Reductive citrate cycle	1200	Carbon metabolism
K00176	korD, oorD; 2-oxoglutarate ferredoxin oxidoreductase subunit delta [EC:1.2.7.3]	ko00001	KEGG Orthology	M00620	Incomplete reductive citrate cycle; acetyl-CoA => oxoglutarate	20	Citrate cycle
K00176	korD, oorD; 2-oxoglutarate ferredoxin oxidoreductase subunit delta [EC:1.2.7.3]	ko00001	KEGG Orthology	M00620	Incomplete reductive citrate cycle; acetyl-CoA => oxoglutarate	720	Carbon fixation pathways in prokaryotes
K00176	korD, oorD; 2-oxoglutarate ferredoxin oxidoreductase subunit delta [EC:1.2.7.3]	ko00001	KEGG Orthology	M00620	Incomplete reductive citrate cycle; acetyl-CoA => oxoglutarate	1100	Metabolic pathways
K00176	korD, oorD; 2-oxoglutarate ferredoxin oxidoreductase subunit delta [EC:1.2.7.3]	ko00001	KEGG Orthology	M00620	Incomplete reductive citrate cycle; acetyl-CoA => oxoglutarate	1110	Biosynthesis of secondary metabolites
K00176	korD, oorD; 2-oxoglutarate ferredoxin oxidoreductase subunit delta [EC:1.2.7.3]	ko00001	KEGG Orthology	M00620	Incomplete reductive citrate cycle; acetyl-CoA => oxoglutarate	1120	Microbial metabolism in diverse environments
K00176	korD, oorD; 2-oxoglutarate ferredoxin oxidoreductase subunit delta [EC:1.2.7.3]	ko00001	KEGG Orthology	M00620	Incomplete reductive citrate cycle; acetyl-CoA => oxoglutarate	1200	Carbon metabolism
K00177	korC, oorC; 2-oxoglutarate ferredoxin oxidoreductase subunit gamma [EC:1.2.7.3]	ko00001	KEGG Orthology	M00009	Citrate cycle	20	Citrate cycle
K00177	korC, oorC; 2-oxoglutarate ferredoxin oxidoreductase subunit gamma [EC:1.2.7.3]	ko00001	KEGG Orthology	M00009	Citrate cycle	720	Carbon fixation pathways in prokaryotes
K00177	korC, oorC; 2-oxoglutarate ferredoxin oxidoreductase subunit gamma [EC:1.2.7.3]	ko00001	KEGG Orthology	M00009	Citrate cycle	1100	Metabolic pathways
K00177	korC, oorC; 2-oxoglutarate ferredoxin oxidoreductase subunit gamma [EC:1.2.7.3]	ko00001	KEGG Orthology	M00009	Citrate cycle	1110	Biosynthesis of secondary metabolites
K00177	korC, oorC; 2-oxoglutarate ferredoxin oxidoreductase subunit gamma [EC:1.2.7.3]	ko00001	KEGG Orthology	M00009	Citrate cycle	1120	Microbial metabolism in diverse environments
K00177	korC, oorC; 2-oxoglutarate ferredoxin oxidoreductase subunit gamma [EC:1.2.7.3]	ko00001	KEGG Orthology	M00009	Citrate cycle	1200	Carbon metabolism
K00177	korC, oorC; 2-oxoglutarate ferredoxin oxidoreductase subunit gamma [EC:1.2.7.3]	ko00001	KEGG Orthology	M00011	Citrate cycle; second carbon oxidation; 2-oxoglutarate => oxaloacetate	20	Citrate cycle
K00177	korC, oorC; 2-oxoglutarate ferredoxin oxidoreductase subunit gamma [EC:1.2.7.3]	ko00001	KEGG Orthology	M00011	Citrate cycle; second carbon oxidation; 2-oxoglutarate => oxaloacetate	720	Carbon fixation pathways in prokaryotes
K00177	korC, oorC; 2-oxoglutarate ferredoxin oxidoreductase subunit gamma [EC:1.2.7.3]	ko00001	KEGG Orthology	M00011	Citrate cycle; second carbon oxidation; 2-oxoglutarate => oxaloacetate	1100	Metabolic pathways
K00177	korC, oorC; 2-oxoglutarate ferredoxin oxidoreductase subunit gamma [EC:1.2.7.3]	ko00001	KEGG Orthology	M00011	Citrate cycle; second carbon oxidation; 2-oxoglutarate => oxaloacetate	1110	Biosynthesis of secondary metabolites
K00177	korC, oorC; 2-oxoglutarate ferredoxin oxidoreductase subunit gamma [EC:1.2.7.3]	ko00001	KEGG Orthology	M00011	Citrate cycle; second carbon oxidation; 2-oxoglutarate => oxaloacetate	1120	Microbial metabolism in diverse environments
K00177	korC, oorC; 2-oxoglutarate ferredoxin oxidoreductase subunit gamma [EC:1.2.7.3]	ko00001	KEGG Orthology	M00011	Citrate cycle; second carbon oxidation; 2-oxoglutarate => oxaloacetate	1200	Carbon metabolism
K00177	korC, oorC; 2-oxoglutarate ferredoxin oxidoreductase subunit gamma [EC:1.2.7.3]	ko00001	KEGG Orthology	M00173	Reductive citrate cycle	20	Citrate cycle
K00177	korC, oorC; 2-oxoglutarate ferredoxin oxidoreductase subunit gamma [EC:1.2.7.3]	ko00001	KEGG Orthology	M00173	Reductive citrate cycle	720	Carbon fixation pathways in prokaryotes
K00177	korC, oorC; 2-oxoglutarate ferredoxin oxidoreductase subunit gamma [EC:1.2.7.3]	ko00001	KEGG Orthology	M00173	Reductive citrate cycle	1100	Metabolic pathways
K00177	korC, oorC; 2-oxoglutarate ferredoxin oxidoreductase subunit gamma [EC:1.2.7.3]	ko00001	KEGG Orthology	M00173	Reductive citrate cycle	1110	Biosynthesis of secondary metabolites
K00177	korC, oorC; 2-oxoglutarate ferredoxin oxidoreductase subunit gamma [EC:1.2.7.3]	ko00001	KEGG Orthology	M00173	Reductive citrate cycle	1120	Microbial metabolism in diverse environments
K00177	korC, oorC; 2-oxoglutarate ferredoxin oxidoreductase subunit gamma [EC:1.2.7.3]	ko00001	KEGG Orthology	M00173	Reductive citrate cycle	1200	Carbon metabolism
K00177	korC, oorC; 2-oxoglutarate ferredoxin oxidoreductase subunit gamma [EC:1.2.7.3]	ko00001	KEGG Orthology	M00620	Incomplete reductive citrate cycle; acetyl-CoA => oxoglutarate	20	Citrate cycle
K00177	korC, oorC; 2-oxoglutarate ferredoxin oxidoreductase subunit gamma [EC:1.2.7.3]	ko00001	KEGG Orthology	M00620	Incomplete reductive citrate cycle; acetyl-CoA => oxoglutarate	720	Carbon fixation pathways in prokaryotes
K00177	korC, oorC; 2-oxoglutarate ferredoxin oxidoreductase subunit gamma [EC:1.2.7.3]	ko00001	KEGG Orthology	M00620	Incomplete reductive citrate cycle; acetyl-CoA => oxoglutarate	1100	Metabolic pathways
K00177	korC, oorC; 2-oxoglutarate ferredoxin oxidoreductase subunit gamma [EC:1.2.7.3]	ko00001	KEGG Orthology	M00620	Incomplete reductive citrate cycle; acetyl-CoA => oxoglutarate	1110	Biosynthesis of secondary metabolites
K00177	korC, oorC; 2-oxoglutarate ferredoxin oxidoreductase subunit gamma [EC:1.2.7.3]	ko00001	KEGG Orthology	M00620	Incomplete reductive citrate cycle; acetyl-CoA => oxoglutarate	1120	Microbial metabolism in diverse environments
K00177	korC, oorC; 2-oxoglutarate ferredoxin oxidoreductase subunit gamma [EC:1.2.7.3]	ko00001	KEGG Orthology	M00620	Incomplete reductive citrate cycle; acetyl-CoA => oxoglutarate	1200	Carbon metabolism
K00179	iorA; indolepyruvate ferredoxin oxidoreductase, alpha subunit [EC:1.2.7.8]	ko00001	KEGG Orthology	NA	NA	NA	NA
K00180	iorB; indolepyruvate ferredoxin oxidoreductase, beta subunit [EC:1.2.7.8]	ko00001	KEGG Orthology	NA	NA	NA	NA
K00184	dmsB; dimethyl sulfoxide reductase iron-sulfur subunit	ko00001	KEGG Orthology	NA	NA	920	Sulfur metabolism
K00184	dmsB; dimethyl sulfoxide reductase iron-sulfur subunit	ko00001	KEGG Orthology	NA	NA	1100	Metabolic pathways
K00185	dmsC; dimethyl sulfoxide reductase membrane subunit	ko00001	KEGG Orthology	NA	NA	920	Sulfur metabolism
K00185	dmsC; dimethyl sulfoxide reductase membrane subunit	ko00001	KEGG Orthology	NA	NA	1100	Metabolic pathways
K00194	cdhD, acsD; acetyl-CoA decarbonylase/synthase, CODH/ACS complex subunit delta [EC:2.1.1.245]	ko00001	KEGG Orthology	M00357	Methanogenesis; acetate => methane	680	Methane metabolism
K00194	cdhD, acsD; acetyl-CoA decarbonylase/synthase, CODH/ACS complex subunit delta [EC:2.1.1.245]	ko00001	KEGG Orthology	M00357	Methanogenesis; acetate => methane	720	Carbon fixation pathways in prokaryotes
K00194	cdhD, acsD; acetyl-CoA decarbonylase/synthase, CODH/ACS complex subunit delta [EC:2.1.1.245]	ko00001	KEGG Orthology	M00357	Methanogenesis; acetate => methane	1100	Metabolic pathways
K00194	cdhD, acsD; acetyl-CoA decarbonylase/synthase, CODH/ACS complex subunit delta [EC:2.1.1.245]	ko00001	KEGG Orthology	M00357	Methanogenesis; acetate => methane	1120	Microbial metabolism in diverse environments
K00194	cdhD, acsD; acetyl-CoA decarbonylase/synthase, CODH/ACS complex subunit delta [EC:2.1.1.245]	ko00001	KEGG Orthology	M00357	Methanogenesis; acetate => methane	1200	Carbon metabolism
K00194	cdhD, acsD; acetyl-CoA decarbonylase/synthase, CODH/ACS complex subunit delta [EC:2.1.1.245]	ko00001	KEGG Orthology	M00377	Reductive acetyl-CoA pathway	680	Methane metabolism
K00194	cdhD, acsD; acetyl-CoA decarbonylase/synthase, CODH/ACS complex subunit delta [EC:2.1.1.245]	ko00001	KEGG Orthology	M00377	Reductive acetyl-CoA pathway	720	Carbon fixation pathways in prokaryotes
K00194	cdhD, acsD; acetyl-CoA decarbonylase/synthase, CODH/ACS complex subunit delta [EC:2.1.1.245]	ko00001	KEGG Orthology	M00377	Reductive acetyl-CoA pathway	1100	Metabolic pathways
K00194	cdhD, acsD; acetyl-CoA decarbonylase/synthase, CODH/ACS complex subunit delta [EC:2.1.1.245]	ko00001	KEGG Orthology	M00377	Reductive acetyl-CoA pathway	1120	Microbial metabolism in diverse environments
K00194	cdhD, acsD; acetyl-CoA decarbonylase/synthase, CODH/ACS complex subunit delta [EC:2.1.1.245]	ko00001	KEGG Orthology	M00377	Reductive acetyl-CoA pathway	1200	Carbon metabolism
K00196	cooF; anaerobic carbon-monoxide dehydrogenase iron sulfur subunit	ko00001	KEGG Orthology	NA	NA	633	Nitrotoluene degradation
K00196	cooF; anaerobic carbon-monoxide dehydrogenase iron sulfur subunit	ko00001	KEGG Orthology	NA	NA	680	Methane metabolism
K00196	cooF; anaerobic carbon-monoxide dehydrogenase iron sulfur subunit	ko00001	KEGG Orthology	NA	NA	720	Carbon fixation pathways in prokaryotes
K00196	cooF; anaerobic carbon-monoxide dehydrogenase iron sulfur subunit	ko00001	KEGG Orthology	NA	NA	1100	Metabolic pathways
K00196	cooF; anaerobic carbon-monoxide dehydrogenase iron sulfur subunit	ko00001	KEGG Orthology	NA	NA	1120	Microbial metabolism in diverse environments
K00196	cooF; anaerobic carbon-monoxide dehydrogenase iron sulfur subunit	ko00001	KEGG Orthology	NA	NA	1200	Carbon metabolism
K00197	cdhE, acsC; acetyl-CoA decarbonylase/synthase, CODH/ACS complex subunit gamma [EC:2.1.1.245]	ko00001	KEGG Orthology	M00357	Methanogenesis; acetate => methane	680	Methane metabolism
K00197	cdhE, acsC; acetyl-CoA decarbonylase/synthase, CODH/ACS complex subunit gamma [EC:2.1.1.245]	ko00001	KEGG Orthology	M00357	Methanogenesis; acetate => methane	720	Carbon fixation pathways in prokaryotes
K00197	cdhE, acsC; acetyl-CoA decarbonylase/synthase, CODH/ACS complex subunit gamma [EC:2.1.1.245]	ko00001	KEGG Orthology	M00357	Methanogenesis; acetate => methane	1100	Metabolic pathways
K00197	cdhE, acsC; acetyl-CoA decarbonylase/synthase, CODH/ACS complex subunit gamma [EC:2.1.1.245]	ko00001	KEGG Orthology	M00357	Methanogenesis; acetate => methane	1120	Microbial metabolism in diverse environments
K00197	cdhE, acsC; acetyl-CoA decarbonylase/synthase, CODH/ACS complex subunit gamma [EC:2.1.1.245]	ko00001	KEGG Orthology	M00357	Methanogenesis; acetate => methane	1200	Carbon metabolism
K00197	cdhE, acsC; acetyl-CoA decarbonylase/synthase, CODH/ACS complex subunit gamma [EC:2.1.1.245]	ko00001	KEGG Orthology	M00377	Reductive acetyl-CoA pathway	680	Methane metabolism
K00197	cdhE, acsC; acetyl-CoA decarbonylase/synthase, CODH/ACS complex subunit gamma [EC:2.1.1.245]	ko00001	KEGG Orthology	M00377	Reductive acetyl-CoA pathway	720	Carbon fixation pathways in prokaryotes
K00197	cdhE, acsC; acetyl-CoA decarbonylase/synthase, CODH/ACS complex subunit gamma [EC:2.1.1.245]	ko00001	KEGG Orthology	M00377	Reductive acetyl-CoA pathway	1100	Metabolic pathways
K00197	cdhE, acsC; acetyl-CoA decarbonylase/synthase, CODH/ACS complex subunit gamma [EC:2.1.1.245]	ko00001	KEGG Orthology	M00377	Reductive acetyl-CoA pathway	1120	Microbial metabolism in diverse environments
K00197	cdhE, acsC; acetyl-CoA decarbonylase/synthase, CODH/ACS complex subunit gamma [EC:2.1.1.245]	ko00001	KEGG Orthology	M00377	Reductive acetyl-CoA pathway	1200	Carbon metabolism
K00198	cooS, acsA; anaerobic carbon-monoxide dehydrogenase catalytic subunit [EC:1.2.7.4]	ko00001	KEGG Orthology	M00377	Reductive acetyl-CoA pathway	633	Nitrotoluene degradation
K00198	cooS, acsA; anaerobic carbon-monoxide dehydrogenase catalytic subunit [EC:1.2.7.4]	ko00001	KEGG Orthology	M00377	Reductive acetyl-CoA pathway	680	Methane metabolism
K00198	cooS, acsA; anaerobic carbon-monoxide dehydrogenase catalytic subunit [EC:1.2.7.4]	ko00001	KEGG Orthology	M00377	Reductive acetyl-CoA pathway	720	Carbon fixation pathways in prokaryotes
K00198	cooS, acsA; anaerobic carbon-monoxide dehydrogenase catalytic subunit [EC:1.2.7.4]	ko00001	KEGG Orthology	M00377	Reductive acetyl-CoA pathway	1100	Metabolic pathways
K00198	cooS, acsA; anaerobic carbon-monoxide dehydrogenase catalytic subunit [EC:1.2.7.4]	ko00001	KEGG Orthology	M00377	Reductive acetyl-CoA pathway	1120	Microbial metabolism in diverse environments
K00198	cooS, acsA; anaerobic carbon-monoxide dehydrogenase catalytic subunit [EC:1.2.7.4]	ko00001	KEGG Orthology	M00377	Reductive acetyl-CoA pathway	1200	Carbon metabolism
K00208	fabI; enoyl-[acyl-carrier protein] reductase I [EC:1.3.1.9 1.3.1.10]	ko00001	KEGG Orthology	M00083	Fatty acid biosynthesis; elongation	61	Fatty acid biosynthesis
K00208	fabI; enoyl-[acyl-carrier protein] reductase I [EC:1.3.1.9 1.3.1.10]	ko00001	KEGG Orthology	M00083	Fatty acid biosynthesis; elongation	333	Prodigiosin biosynthesis
K00208	fabI; enoyl-[acyl-carrier protein] reductase I [EC:1.3.1.9 1.3.1.10]	ko00001	KEGG Orthology	M00083	Fatty acid biosynthesis; elongation	780	Biotin metabolism
K00208	fabI; enoyl-[acyl-carrier protein] reductase I [EC:1.3.1.9 1.3.1.10]	ko00001	KEGG Orthology	M00083	Fatty acid biosynthesis; elongation	1100	Metabolic pathways
K00208	fabI; enoyl-[acyl-carrier protein] reductase I [EC:1.3.1.9 1.3.1.10]	ko00001	KEGG Orthology	M00083	Fatty acid biosynthesis; elongation	1110	Biosynthesis of secondary metabolites
K00208	fabI; enoyl-[acyl-carrier protein] reductase I [EC:1.3.1.9 1.3.1.10]	ko00001	KEGG Orthology	M00083	Fatty acid biosynthesis; elongation	1212	Fatty acid metabolism
K00208	fabI; enoyl-[acyl-carrier protein] reductase I [EC:1.3.1.9 1.3.1.10]	ko00001	KEGG Orthology	M00083	Fatty acid biosynthesis; elongation	1240	Biosynthesis of cofactors
K00208	fabI; enoyl-[acyl-carrier protein] reductase I [EC:1.3.1.9 1.3.1.10]	ko00001	KEGG Orthology	M00572	Pimeloyl-ACP biosynthesis; BioC-BioH pathway; malonyl-ACP => pimeloyl-ACP	61	Fatty acid biosynthesis
K00208	fabI; enoyl-[acyl-carrier protein] reductase I [EC:1.3.1.9 1.3.1.10]	ko00001	KEGG Orthology	M00572	Pimeloyl-ACP biosynthesis; BioC-BioH pathway; malonyl-ACP => pimeloyl-ACP	333	Prodigiosin biosynthesis
K00208	fabI; enoyl-[acyl-carrier protein] reductase I [EC:1.3.1.9 1.3.1.10]	ko00001	KEGG Orthology	M00572	Pimeloyl-ACP biosynthesis; BioC-BioH pathway; malonyl-ACP => pimeloyl-ACP	780	Biotin metabolism
K00208	fabI; enoyl-[acyl-carrier protein] reductase I [EC:1.3.1.9 1.3.1.10]	ko00001	KEGG Orthology	M00572	Pimeloyl-ACP biosynthesis; BioC-BioH pathway; malonyl-ACP => pimeloyl-ACP	1100	Metabolic pathways
K00208	fabI; enoyl-[acyl-carrier protein] reductase I [EC:1.3.1.9 1.3.1.10]	ko00001	KEGG Orthology	M00572	Pimeloyl-ACP biosynthesis; BioC-BioH pathway; malonyl-ACP => pimeloyl-ACP	1110	Biosynthesis of secondary metabolites
K00208	fabI; enoyl-[acyl-carrier protein] reductase I [EC:1.3.1.9 1.3.1.10]	ko00001	KEGG Orthology	M00572	Pimeloyl-ACP biosynthesis; BioC-BioH pathway; malonyl-ACP => pimeloyl-ACP	1212	Fatty acid metabolism
K00208	fabI; enoyl-[acyl-carrier protein] reductase I [EC:1.3.1.9 1.3.1.10]	ko00001	KEGG Orthology	M00572	Pimeloyl-ACP biosynthesis; BioC-BioH pathway; malonyl-ACP => pimeloyl-ACP	1240	Biosynthesis of cofactors
K00209	fabV, ter; enoyl-[acyl-carrier protein] reductase / trans-2-enoyl-CoA reductase [EC:1.3.1.9 1.3.1.44]	ko00001	KEGG Orthology	M00083	Fatty acid biosynthesis; elongation	61	Fatty acid biosynthesis
K00209	fabV, ter; enoyl-[acyl-carrier protein] reductase / trans-2-enoyl-CoA reductase [EC:1.3.1.9 1.3.1.44]	ko00001	KEGG Orthology	M00083	Fatty acid biosynthesis; elongation	650	Butanoate metabolism
K00209	fabV, ter; enoyl-[acyl-carrier protein] reductase / trans-2-enoyl-CoA reductase [EC:1.3.1.9 1.3.1.44]	ko00001	KEGG Orthology	M00083	Fatty acid biosynthesis; elongation	1100	Metabolic pathways
K00209	fabV, ter; enoyl-[acyl-carrier protein] reductase / trans-2-enoyl-CoA reductase [EC:1.3.1.9 1.3.1.44]	ko00001	KEGG Orthology	M00083	Fatty acid biosynthesis; elongation	1110	Biosynthesis of secondary metabolites
K00209	fabV, ter; enoyl-[acyl-carrier protein] reductase / trans-2-enoyl-CoA reductase [EC:1.3.1.9 1.3.1.44]	ko00001	KEGG Orthology	M00083	Fatty acid biosynthesis; elongation	1120	Microbial metabolism in diverse environments
K00209	fabV, ter; enoyl-[acyl-carrier protein] reductase / trans-2-enoyl-CoA reductase [EC:1.3.1.9 1.3.1.44]	ko00001	KEGG Orthology	M00083	Fatty acid biosynthesis; elongation	1200	Carbon metabolism
K00209	fabV, ter; enoyl-[acyl-carrier protein] reductase / trans-2-enoyl-CoA reductase [EC:1.3.1.9 1.3.1.44]	ko00001	KEGG Orthology	M00083	Fatty acid biosynthesis; elongation	1212	Fatty acid metabolism
K00215	dapB; 4-hydroxy-tetrahydrodipicolinate reductase [EC:1.17.1.8]	ko00001	KEGG Orthology	M00016	Lysine biosynthesis; succinyl-DAP pathway; aspartate => lysine	261	Monobactam biosynthesis
K00215	dapB; 4-hydroxy-tetrahydrodipicolinate reductase [EC:1.17.1.8]	ko00001	KEGG Orthology	M00016	Lysine biosynthesis; succinyl-DAP pathway; aspartate => lysine	300	Lysine biosynthesis
K00215	dapB; 4-hydroxy-tetrahydrodipicolinate reductase [EC:1.17.1.8]	ko00001	KEGG Orthology	M00016	Lysine biosynthesis; succinyl-DAP pathway; aspartate => lysine	1100	Metabolic pathways
K00215	dapB; 4-hydroxy-tetrahydrodipicolinate reductase [EC:1.17.1.8]	ko00001	KEGG Orthology	M00016	Lysine biosynthesis; succinyl-DAP pathway; aspartate => lysine	1110	Biosynthesis of secondary metabolites
K00215	dapB; 4-hydroxy-tetrahydrodipicolinate reductase [EC:1.17.1.8]	ko00001	KEGG Orthology	M00016	Lysine biosynthesis; succinyl-DAP pathway; aspartate => lysine	1120	Microbial metabolism in diverse environments
K00215	dapB; 4-hydroxy-tetrahydrodipicolinate reductase [EC:1.17.1.8]	ko00001	KEGG Orthology	M00016	Lysine biosynthesis; succinyl-DAP pathway; aspartate => lysine	1230	Biosynthesis of amino acids
K00215	dapB; 4-hydroxy-tetrahydrodipicolinate reductase [EC:1.17.1.8]	ko00001	KEGG Orthology	M00525	Lysine biosynthesis; acetyl-DAP pathway; aspartate => lysine	261	Monobactam biosynthesis
K00215	dapB; 4-hydroxy-tetrahydrodipicolinate reductase [EC:1.17.1.8]	ko00001	KEGG Orthology	M00525	Lysine biosynthesis; acetyl-DAP pathway; aspartate => lysine	300	Lysine biosynthesis
K00215	dapB; 4-hydroxy-tetrahydrodipicolinate reductase [EC:1.17.1.8]	ko00001	KEGG Orthology	M00525	Lysine biosynthesis; acetyl-DAP pathway; aspartate => lysine	1100	Metabolic pathways
K00215	dapB; 4-hydroxy-tetrahydrodipicolinate reductase [EC:1.17.1.8]	ko00001	KEGG Orthology	M00525	Lysine biosynthesis; acetyl-DAP pathway; aspartate => lysine	1110	Biosynthesis of secondary metabolites
K00215	dapB; 4-hydroxy-tetrahydrodipicolinate reductase [EC:1.17.1.8]	ko00001	KEGG Orthology	M00525	Lysine biosynthesis; acetyl-DAP pathway; aspartate => lysine	1120	Microbial metabolism in diverse environments
K00215	dapB; 4-hydroxy-tetrahydrodipicolinate reductase [EC:1.17.1.8]	ko00001	KEGG Orthology	M00525	Lysine biosynthesis; acetyl-DAP pathway; aspartate => lysine	1230	Biosynthesis of amino acids
K00215	dapB; 4-hydroxy-tetrahydrodipicolinate reductase [EC:1.17.1.8]	ko00001	KEGG Orthology	M00526	Lysine biosynthesis; DAP dehydrogenase pathway; aspartate => lysine	261	Monobactam biosynthesis
K00215	dapB; 4-hydroxy-tetrahydrodipicolinate reductase [EC:1.17.1.8]	ko00001	KEGG Orthology	M00526	Lysine biosynthesis; DAP dehydrogenase pathway; aspartate => lysine	300	Lysine biosynthesis
K00215	dapB; 4-hydroxy-tetrahydrodipicolinate reductase [EC:1.17.1.8]	ko00001	KEGG Orthology	M00526	Lysine biosynthesis; DAP dehydrogenase pathway; aspartate => lysine	1100	Metabolic pathways
K00215	dapB; 4-hydroxy-tetrahydrodipicolinate reductase [EC:1.17.1.8]	ko00001	KEGG Orthology	M00526	Lysine biosynthesis; DAP dehydrogenase pathway; aspartate => lysine	1110	Biosynthesis of secondary metabolites
K00215	dapB; 4-hydroxy-tetrahydrodipicolinate reductase [EC:1.17.1.8]	ko00001	KEGG Orthology	M00526	Lysine biosynthesis; DAP dehydrogenase pathway; aspartate => lysine	1120	Microbial metabolism in diverse environments
K00215	dapB; 4-hydroxy-tetrahydrodipicolinate reductase [EC:1.17.1.8]	ko00001	KEGG Orthology	M00526	Lysine biosynthesis; DAP dehydrogenase pathway; aspartate => lysine	1230	Biosynthesis of amino acids
K00215	dapB; 4-hydroxy-tetrahydrodipicolinate reductase [EC:1.17.1.8]	ko00001	KEGG Orthology	M00527	Lysine biosynthesis; DAP aminotransferase pathway; aspartate => lysine	261	Monobactam biosynthesis
K00215	dapB; 4-hydroxy-tetrahydrodipicolinate reductase [EC:1.17.1.8]	ko00001	KEGG Orthology	M00527	Lysine biosynthesis; DAP aminotransferase pathway; aspartate => lysine	300	Lysine biosynthesis
K00215	dapB; 4-hydroxy-tetrahydrodipicolinate reductase [EC:1.17.1.8]	ko00001	KEGG Orthology	M00527	Lysine biosynthesis; DAP aminotransferase pathway; aspartate => lysine	1100	Metabolic pathways
K00215	dapB; 4-hydroxy-tetrahydrodipicolinate reductase [EC:1.17.1.8]	ko00001	KEGG Orthology	M00527	Lysine biosynthesis; DAP aminotransferase pathway; aspartate => lysine	1110	Biosynthesis of secondary metabolites
K00215	dapB; 4-hydroxy-tetrahydrodipicolinate reductase [EC:1.17.1.8]	ko00001	KEGG Orthology	M00527	Lysine biosynthesis; DAP aminotransferase pathway; aspartate => lysine	1120	Microbial metabolism in diverse environments
K00215	dapB; 4-hydroxy-tetrahydrodipicolinate reductase [EC:1.17.1.8]	ko00001	KEGG Orthology	M00527	Lysine biosynthesis; DAP aminotransferase pathway; aspartate => lysine	1230	Biosynthesis of amino acids
K00216	entA; 2,3-dihydro-2,3-dihydroxybenzoate dehydrogenase [EC:1.3.1.28]	ko00001	KEGG Orthology	NA	NA	1053	Biosynthesis of siderophore group nonribosomal peptides
K00216	entA; 2,3-dihydro-2,3-dihydroxybenzoate dehydrogenase [EC:1.3.1.28]	ko00001	KEGG Orthology	NA	NA	1110	Biosynthesis of secondary metabolites
K00219	fadH; 2,4-dienoyl-CoA reductase [EC:1.3.1.34]	ko00001	KEGG Orthology	NA	NA	NA	NA
K00222	TM7SF2, ERG24; Delta14-sterol reductase [EC:1.3.1.70]	ko00001	KEGG Orthology	M00101	Cholesterol biosynthesis; squalene 2;3-epoxide => cholesterol	100	Steroid biosynthesis
K00222	TM7SF2, ERG24; Delta14-sterol reductase [EC:1.3.1.70]	ko00001	KEGG Orthology	M00101	Cholesterol biosynthesis; squalene 2;3-epoxide => cholesterol	1100	Metabolic pathways
K00222	TM7SF2, ERG24; Delta14-sterol reductase [EC:1.3.1.70]	ko00001	KEGG Orthology	M00101	Cholesterol biosynthesis; squalene 2;3-epoxide => cholesterol	1110	Biosynthesis of secondary metabolites
K00222	TM7SF2, ERG24; Delta14-sterol reductase [EC:1.3.1.70]	ko00001	KEGG Orthology	M00102	Ergocalciferol biosynthesis; squalene 2;3-epoxide => ergosterol_ergocalciferol	100	Steroid biosynthesis
K00222	TM7SF2, ERG24; Delta14-sterol reductase [EC:1.3.1.70]	ko00001	KEGG Orthology	M00102	Ergocalciferol biosynthesis; squalene 2;3-epoxide => ergosterol_ergocalciferol	1100	Metabolic pathways
K00222	TM7SF2, ERG24; Delta14-sterol reductase [EC:1.3.1.70]	ko00001	KEGG Orthology	M00102	Ergocalciferol biosynthesis; squalene 2;3-epoxide => ergosterol_ergocalciferol	1110	Biosynthesis of secondary metabolites
K00222	TM7SF2, ERG24; Delta14-sterol reductase [EC:1.3.1.70]	ko00001	KEGG Orthology	M00917	Phytosterol biosynthesis; squalene 2;3-epoxide => campesterol_sitosterol	100	Steroid biosynthesis
K00222	TM7SF2, ERG24; Delta14-sterol reductase [EC:1.3.1.70]	ko00001	KEGG Orthology	M00917	Phytosterol biosynthesis; squalene 2;3-epoxide => campesterol_sitosterol	1100	Metabolic pathways
K00222	TM7SF2, ERG24; Delta14-sterol reductase [EC:1.3.1.70]	ko00001	KEGG Orthology	M00917	Phytosterol biosynthesis; squalene 2;3-epoxide => campesterol_sitosterol	1110	Biosynthesis of secondary metabolites
K00226	pyrD; dihydroorotate dehydrogenase [EC:1.3.98.1]	ko00001	KEGG Orthology	M00051	De novo pyrimidine biosynthesis; glutamine	240	Pyrimidine metabolism
K00226	pyrD; dihydroorotate dehydrogenase [EC:1.3.98.1]	ko00001	KEGG Orthology	M00051	De novo pyrimidine biosynthesis; glutamine	1100	Metabolic pathways
K00226	pyrD; dihydroorotate dehydrogenase [EC:1.3.98.1]	ko00001	KEGG Orthology	M00051	De novo pyrimidine biosynthesis; glutamine	1240	Biosynthesis of cofactors
K00228	CPOX, hemF; coproporphyrinogen III oxidase [EC:1.3.3.3]	ko00001	KEGG Orthology	M00121	Heme biosynthesis; plants and bacteria; glutamate => heme	860	Porphyrin metabolism
K00228	CPOX, hemF; coproporphyrinogen III oxidase [EC:1.3.3.3]	ko00001	KEGG Orthology	M00121	Heme biosynthesis; plants and bacteria; glutamate => heme	1100	Metabolic pathways
K00228	CPOX, hemF; coproporphyrinogen III oxidase [EC:1.3.3.3]	ko00001	KEGG Orthology	M00121	Heme biosynthesis; plants and bacteria; glutamate => heme	1110	Biosynthesis of secondary metabolites
K00228	CPOX, hemF; coproporphyrinogen III oxidase [EC:1.3.3.3]	ko00001	KEGG Orthology	M00121	Heme biosynthesis; plants and bacteria; glutamate => heme	1240	Biosynthesis of cofactors
K00228	CPOX, hemF; coproporphyrinogen III oxidase [EC:1.3.3.3]	ko00001	KEGG Orthology	M00868	Heme biosynthesis; animals and fungi; glycine => heme	860	Porphyrin metabolism
K00228	CPOX, hemF; coproporphyrinogen III oxidase [EC:1.3.3.3]	ko00001	KEGG Orthology	M00868	Heme biosynthesis; animals and fungi; glycine => heme	1100	Metabolic pathways
K00228	CPOX, hemF; coproporphyrinogen III oxidase [EC:1.3.3.3]	ko00001	KEGG Orthology	M00868	Heme biosynthesis; animals and fungi; glycine => heme	1110	Biosynthesis of secondary metabolites
K00228	CPOX, hemF; coproporphyrinogen III oxidase [EC:1.3.3.3]	ko00001	KEGG Orthology	M00868	Heme biosynthesis; animals and fungi; glycine => heme	1240	Biosynthesis of cofactors
K00230	hemG; menaquinone-dependent protoporphyrinogen oxidase [EC:1.3.5.3]	ko00001	KEGG Orthology	M00121	Heme biosynthesis; plants and bacteria; glutamate => heme	860	Porphyrin metabolism
K00230	hemG; menaquinone-dependent protoporphyrinogen oxidase [EC:1.3.5.3]	ko00001	KEGG Orthology	M00121	Heme biosynthesis; plants and bacteria; glutamate => heme	1100	Metabolic pathways
K00230	hemG; menaquinone-dependent protoporphyrinogen oxidase [EC:1.3.5.3]	ko00001	KEGG Orthology	M00121	Heme biosynthesis; plants and bacteria; glutamate => heme	1110	Biosynthesis of secondary metabolites
K00230	hemG; menaquinone-dependent protoporphyrinogen oxidase [EC:1.3.5.3]	ko00001	KEGG Orthology	M00121	Heme biosynthesis; plants and bacteria; glutamate => heme	1240	Biosynthesis of cofactors
K00231	PPOX, hemY; protoporphyrinogen/coproporphyrinogen III oxidase [EC:1.3.3.4 1.3.3.15]	ko00001	KEGG Orthology	M00121	Heme biosynthesis; plants and bacteria; glutamate => heme	860	Porphyrin metabolism
K00231	PPOX, hemY; protoporphyrinogen/coproporphyrinogen III oxidase [EC:1.3.3.4 1.3.3.15]	ko00001	KEGG Orthology	M00121	Heme biosynthesis; plants and bacteria; glutamate => heme	1100	Metabolic pathways
K00231	PPOX, hemY; protoporphyrinogen/coproporphyrinogen III oxidase [EC:1.3.3.4 1.3.3.15]	ko00001	KEGG Orthology	M00121	Heme biosynthesis; plants and bacteria; glutamate => heme	1110	Biosynthesis of secondary metabolites
K00231	PPOX, hemY; protoporphyrinogen/coproporphyrinogen III oxidase [EC:1.3.3.4 1.3.3.15]	ko00001	KEGG Orthology	M00121	Heme biosynthesis; plants and bacteria; glutamate => heme	1240	Biosynthesis of cofactors
K00231	PPOX, hemY; protoporphyrinogen/coproporphyrinogen III oxidase [EC:1.3.3.4 1.3.3.15]	ko00001	KEGG Orthology	M00868	Heme biosynthesis; animals and fungi; glycine => heme	860	Porphyrin metabolism
K00231	PPOX, hemY; protoporphyrinogen/coproporphyrinogen III oxidase [EC:1.3.3.4 1.3.3.15]	ko00001	KEGG Orthology	M00868	Heme biosynthesis; animals and fungi; glycine => heme	1100	Metabolic pathways
K00231	PPOX, hemY; protoporphyrinogen/coproporphyrinogen III oxidase [EC:1.3.3.4 1.3.3.15]	ko00001	KEGG Orthology	M00868	Heme biosynthesis; animals and fungi; glycine => heme	1110	Biosynthesis of secondary metabolites
K00231	PPOX, hemY; protoporphyrinogen/coproporphyrinogen III oxidase [EC:1.3.3.4 1.3.3.15]	ko00001	KEGG Orthology	M00868	Heme biosynthesis; animals and fungi; glycine => heme	1240	Biosynthesis of cofactors
K00231	PPOX, hemY; protoporphyrinogen/coproporphyrinogen III oxidase [EC:1.3.3.4 1.3.3.15]	ko00001	KEGG Orthology	M00926	Heme biosynthesis; bacteria; glutamyl-tRNA => coproporphyrin III => heme	860	Porphyrin metabolism
K00231	PPOX, hemY; protoporphyrinogen/coproporphyrinogen III oxidase [EC:1.3.3.4 1.3.3.15]	ko00001	KEGG Orthology	M00926	Heme biosynthesis; bacteria; glutamyl-tRNA => coproporphyrin III => heme	1100	Metabolic pathways
K00231	PPOX, hemY; protoporphyrinogen/coproporphyrinogen III oxidase [EC:1.3.3.4 1.3.3.15]	ko00001	KEGG Orthology	M00926	Heme biosynthesis; bacteria; glutamyl-tRNA => coproporphyrin III => heme	1110	Biosynthesis of secondary metabolites
K00231	PPOX, hemY; protoporphyrinogen/coproporphyrinogen III oxidase [EC:1.3.3.4 1.3.3.15]	ko00001	KEGG Orthology	M00926	Heme biosynthesis; bacteria; glutamyl-tRNA => coproporphyrin III => heme	1240	Biosynthesis of cofactors
K00239	sdhA, frdA; succinate dehydrogenase flavoprotein subunit [EC:1.3.5.1]	ko00001	KEGG Orthology	M00009	Citrate cycle	20	Citrate cycle
K00239	sdhA, frdA; succinate dehydrogenase flavoprotein subunit [EC:1.3.5.1]	ko00001	KEGG Orthology	M00009	Citrate cycle	190	Oxidative phosphorylation
K00239	sdhA, frdA; succinate dehydrogenase flavoprotein subunit [EC:1.3.5.1]	ko00001	KEGG Orthology	M00009	Citrate cycle	650	Butanoate metabolism
K00239	sdhA, frdA; succinate dehydrogenase flavoprotein subunit [EC:1.3.5.1]	ko00001	KEGG Orthology	M00009	Citrate cycle	720	Carbon fixation pathways in prokaryotes
K00239	sdhA, frdA; succinate dehydrogenase flavoprotein subunit [EC:1.3.5.1]	ko00001	KEGG Orthology	M00009	Citrate cycle	1100	Metabolic pathways
K00239	sdhA, frdA; succinate dehydrogenase flavoprotein subunit [EC:1.3.5.1]	ko00001	KEGG Orthology	M00009	Citrate cycle	1110	Biosynthesis of secondary metabolites
K00239	sdhA, frdA; succinate dehydrogenase flavoprotein subunit [EC:1.3.5.1]	ko00001	KEGG Orthology	M00009	Citrate cycle	1120	Microbial metabolism in diverse environments
K00239	sdhA, frdA; succinate dehydrogenase flavoprotein subunit [EC:1.3.5.1]	ko00001	KEGG Orthology	M00009	Citrate cycle	1200	Carbon metabolism
K00239	sdhA, frdA; succinate dehydrogenase flavoprotein subunit [EC:1.3.5.1]	ko00001	KEGG Orthology	M00009	Citrate cycle	5134	Legionellosis
K00239	sdhA, frdA; succinate dehydrogenase flavoprotein subunit [EC:1.3.5.1]	ko00001	KEGG Orthology	M00011	Citrate cycle; second carbon oxidation; 2-oxoglutarate => oxaloacetate	20	Citrate cycle
K00239	sdhA, frdA; succinate dehydrogenase flavoprotein subunit [EC:1.3.5.1]	ko00001	KEGG Orthology	M00011	Citrate cycle; second carbon oxidation; 2-oxoglutarate => oxaloacetate	190	Oxidative phosphorylation
K00239	sdhA, frdA; succinate dehydrogenase flavoprotein subunit [EC:1.3.5.1]	ko00001	KEGG Orthology	M00011	Citrate cycle; second carbon oxidation; 2-oxoglutarate => oxaloacetate	650	Butanoate metabolism
K00239	sdhA, frdA; succinate dehydrogenase flavoprotein subunit [EC:1.3.5.1]	ko00001	KEGG Orthology	M00011	Citrate cycle; second carbon oxidation; 2-oxoglutarate => oxaloacetate	720	Carbon fixation pathways in prokaryotes
K00239	sdhA, frdA; succinate dehydrogenase flavoprotein subunit [EC:1.3.5.1]	ko00001	KEGG Orthology	M00011	Citrate cycle; second carbon oxidation; 2-oxoglutarate => oxaloacetate	1100	Metabolic pathways
K00239	sdhA, frdA; succinate dehydrogenase flavoprotein subunit [EC:1.3.5.1]	ko00001	KEGG Orthology	M00011	Citrate cycle; second carbon oxidation; 2-oxoglutarate => oxaloacetate	1110	Biosynthesis of secondary metabolites
K00239	sdhA, frdA; succinate dehydrogenase flavoprotein subunit [EC:1.3.5.1]	ko00001	KEGG Orthology	M00011	Citrate cycle; second carbon oxidation; 2-oxoglutarate => oxaloacetate	1120	Microbial metabolism in diverse environments
K00239	sdhA, frdA; succinate dehydrogenase flavoprotein subunit [EC:1.3.5.1]	ko00001	KEGG Orthology	M00011	Citrate cycle; second carbon oxidation; 2-oxoglutarate => oxaloacetate	1200	Carbon metabolism
K00239	sdhA, frdA; succinate dehydrogenase flavoprotein subunit [EC:1.3.5.1]	ko00001	KEGG Orthology	M00011	Citrate cycle; second carbon oxidation; 2-oxoglutarate => oxaloacetate	5134	Legionellosis
K00239	sdhA, frdA; succinate dehydrogenase flavoprotein subunit [EC:1.3.5.1]	ko00001	KEGG Orthology	M00149	Succinate dehydrogenase; prokaryotes	20	Citrate cycle
K00239	sdhA, frdA; succinate dehydrogenase flavoprotein subunit [EC:1.3.5.1]	ko00001	KEGG Orthology	M00149	Succinate dehydrogenase; prokaryotes	190	Oxidative phosphorylation
K00239	sdhA, frdA; succinate dehydrogenase flavoprotein subunit [EC:1.3.5.1]	ko00001	KEGG Orthology	M00149	Succinate dehydrogenase; prokaryotes	650	Butanoate metabolism
K00239	sdhA, frdA; succinate dehydrogenase flavoprotein subunit [EC:1.3.5.1]	ko00001	KEGG Orthology	M00149	Succinate dehydrogenase; prokaryotes	720	Carbon fixation pathways in prokaryotes
K00239	sdhA, frdA; succinate dehydrogenase flavoprotein subunit [EC:1.3.5.1]	ko00001	KEGG Orthology	M00149	Succinate dehydrogenase; prokaryotes	1100	Metabolic pathways
K00239	sdhA, frdA; succinate dehydrogenase flavoprotein subunit [EC:1.3.5.1]	ko00001	KEGG Orthology	M00149	Succinate dehydrogenase; prokaryotes	1110	Biosynthesis of secondary metabolites
K00239	sdhA, frdA; succinate dehydrogenase flavoprotein subunit [EC:1.3.5.1]	ko00001	KEGG Orthology	M00149	Succinate dehydrogenase; prokaryotes	1120	Microbial metabolism in diverse environments
K00239	sdhA, frdA; succinate dehydrogenase flavoprotein subunit [EC:1.3.5.1]	ko00001	KEGG Orthology	M00149	Succinate dehydrogenase; prokaryotes	1200	Carbon metabolism
K00239	sdhA, frdA; succinate dehydrogenase flavoprotein subunit [EC:1.3.5.1]	ko00001	KEGG Orthology	M00149	Succinate dehydrogenase; prokaryotes	5134	Legionellosis
K00239	sdhA, frdA; succinate dehydrogenase flavoprotein subunit [EC:1.3.5.1]	ko00001	KEGG Orthology	M00173	Reductive citrate cycle	20	Citrate cycle
K00239	sdhA, frdA; succinate dehydrogenase flavoprotein subunit [EC:1.3.5.1]	ko00001	KEGG Orthology	M00173	Reductive citrate cycle	190	Oxidative phosphorylation
K00239	sdhA, frdA; succinate dehydrogenase flavoprotein subunit [EC:1.3.5.1]	ko00001	KEGG Orthology	M00173	Reductive citrate cycle	650	Butanoate metabolism
K00239	sdhA, frdA; succinate dehydrogenase flavoprotein subunit [EC:1.3.5.1]	ko00001	KEGG Orthology	M00173	Reductive citrate cycle	720	Carbon fixation pathways in prokaryotes
K00239	sdhA, frdA; succinate dehydrogenase flavoprotein subunit [EC:1.3.5.1]	ko00001	KEGG Orthology	M00173	Reductive citrate cycle	1100	Metabolic pathways
K00239	sdhA, frdA; succinate dehydrogenase flavoprotein subunit [EC:1.3.5.1]	ko00001	KEGG Orthology	M00173	Reductive citrate cycle	1110	Biosynthesis of secondary metabolites
K00239	sdhA, frdA; succinate dehydrogenase flavoprotein subunit [EC:1.3.5.1]	ko00001	KEGG Orthology	M00173	Reductive citrate cycle	1120	Microbial metabolism in diverse environments
K00239	sdhA, frdA; succinate dehydrogenase flavoprotein subunit [EC:1.3.5.1]	ko00001	KEGG Orthology	M00173	Reductive citrate cycle	1200	Carbon metabolism
K00239	sdhA, frdA; succinate dehydrogenase flavoprotein subunit [EC:1.3.5.1]	ko00001	KEGG Orthology	M00173	Reductive citrate cycle	5134	Legionellosis
K00239	sdhA, frdA; succinate dehydrogenase flavoprotein subunit [EC:1.3.5.1]	ko00001	KEGG Orthology	M00374	Dicarboxylate-hydroxybutyrate cycle	20	Citrate cycle
K00239	sdhA, frdA; succinate dehydrogenase flavoprotein subunit [EC:1.3.5.1]	ko00001	KEGG Orthology	M00374	Dicarboxylate-hydroxybutyrate cycle	190	Oxidative phosphorylation
K00239	sdhA, frdA; succinate dehydrogenase flavoprotein subunit [EC:1.3.5.1]	ko00001	KEGG Orthology	M00374	Dicarboxylate-hydroxybutyrate cycle	650	Butanoate metabolism
K00239	sdhA, frdA; succinate dehydrogenase flavoprotein subunit [EC:1.3.5.1]	ko00001	KEGG Orthology	M00374	Dicarboxylate-hydroxybutyrate cycle	720	Carbon fixation pathways in prokaryotes
K00239	sdhA, frdA; succinate dehydrogenase flavoprotein subunit [EC:1.3.5.1]	ko00001	KEGG Orthology	M00374	Dicarboxylate-hydroxybutyrate cycle	1100	Metabolic pathways
K00239	sdhA, frdA; succinate dehydrogenase flavoprotein subunit [EC:1.3.5.1]	ko00001	KEGG Orthology	M00374	Dicarboxylate-hydroxybutyrate cycle	1110	Biosynthesis of secondary metabolites
K00239	sdhA, frdA; succinate dehydrogenase flavoprotein subunit [EC:1.3.5.1]	ko00001	KEGG Orthology	M00374	Dicarboxylate-hydroxybutyrate cycle	1120	Microbial metabolism in diverse environments
K00239	sdhA, frdA; succinate dehydrogenase flavoprotein subunit [EC:1.3.5.1]	ko00001	KEGG Orthology	M00374	Dicarboxylate-hydroxybutyrate cycle	1200	Carbon metabolism
K00239	sdhA, frdA; succinate dehydrogenase flavoprotein subunit [EC:1.3.5.1]	ko00001	KEGG Orthology	M00374	Dicarboxylate-hydroxybutyrate cycle	5134	Legionellosis
K00239	sdhA, frdA; succinate dehydrogenase flavoprotein subunit [EC:1.3.5.1]	ko00001	KEGG Orthology	M00376	3-Hydroxypropionate bi-cycle	20	Citrate cycle
K00239	sdhA, frdA; succinate dehydrogenase flavoprotein subunit [EC:1.3.5.1]	ko00001	KEGG Orthology	M00376	3-Hydroxypropionate bi-cycle	190	Oxidative phosphorylation
K00239	sdhA, frdA; succinate dehydrogenase flavoprotein subunit [EC:1.3.5.1]	ko00001	KEGG Orthology	M00376	3-Hydroxypropionate bi-cycle	650	Butanoate metabolism
K00239	sdhA, frdA; succinate dehydrogenase flavoprotein subunit [EC:1.3.5.1]	ko00001	KEGG Orthology	M00376	3-Hydroxypropionate bi-cycle	720	Carbon fixation pathways in prokaryotes
K00239	sdhA, frdA; succinate dehydrogenase flavoprotein subunit [EC:1.3.5.1]	ko00001	KEGG Orthology	M00376	3-Hydroxypropionate bi-cycle	1100	Metabolic pathways
K00239	sdhA, frdA; succinate dehydrogenase flavoprotein subunit [EC:1.3.5.1]	ko00001	KEGG Orthology	M00376	3-Hydroxypropionate bi-cycle	1110	Biosynthesis of secondary metabolites
K00239	sdhA, frdA; succinate dehydrogenase flavoprotein subunit [EC:1.3.5.1]	ko00001	KEGG Orthology	M00376	3-Hydroxypropionate bi-cycle	1120	Microbial metabolism in diverse environments
K00239	sdhA, frdA; succinate dehydrogenase flavoprotein subunit [EC:1.3.5.1]	ko00001	KEGG Orthology	M00376	3-Hydroxypropionate bi-cycle	1200	Carbon metabolism
K00239	sdhA, frdA; succinate dehydrogenase flavoprotein subunit [EC:1.3.5.1]	ko00001	KEGG Orthology	M00376	3-Hydroxypropionate bi-cycle	5134	Legionellosis
K00240	sdhB, frdB; succinate dehydrogenase iron-sulfur subunit [EC:1.3.5.1]	ko00001	KEGG Orthology	M00009	Citrate cycle	20	Citrate cycle
K00240	sdhB, frdB; succinate dehydrogenase iron-sulfur subunit [EC:1.3.5.1]	ko00001	KEGG Orthology	M00009	Citrate cycle	190	Oxidative phosphorylation
K00240	sdhB, frdB; succinate dehydrogenase iron-sulfur subunit [EC:1.3.5.1]	ko00001	KEGG Orthology	M00009	Citrate cycle	650	Butanoate metabolism
K00240	sdhB, frdB; succinate dehydrogenase iron-sulfur subunit [EC:1.3.5.1]	ko00001	KEGG Orthology	M00009	Citrate cycle	720	Carbon fixation pathways in prokaryotes
K00240	sdhB, frdB; succinate dehydrogenase iron-sulfur subunit [EC:1.3.5.1]	ko00001	KEGG Orthology	M00009	Citrate cycle	1100	Metabolic pathways
K00240	sdhB, frdB; succinate dehydrogenase iron-sulfur subunit [EC:1.3.5.1]	ko00001	KEGG Orthology	M00009	Citrate cycle	1110	Biosynthesis of secondary metabolites
K00240	sdhB, frdB; succinate dehydrogenase iron-sulfur subunit [EC:1.3.5.1]	ko00001	KEGG Orthology	M00009	Citrate cycle	1120	Microbial metabolism in diverse environments
K00240	sdhB, frdB; succinate dehydrogenase iron-sulfur subunit [EC:1.3.5.1]	ko00001	KEGG Orthology	M00009	Citrate cycle	1200	Carbon metabolism
K00240	sdhB, frdB; succinate dehydrogenase iron-sulfur subunit [EC:1.3.5.1]	ko00001	KEGG Orthology	M00011	Citrate cycle; second carbon oxidation; 2-oxoglutarate => oxaloacetate	20	Citrate cycle
K00240	sdhB, frdB; succinate dehydrogenase iron-sulfur subunit [EC:1.3.5.1]	ko00001	KEGG Orthology	M00011	Citrate cycle; second carbon oxidation; 2-oxoglutarate => oxaloacetate	190	Oxidative phosphorylation
K00240	sdhB, frdB; succinate dehydrogenase iron-sulfur subunit [EC:1.3.5.1]	ko00001	KEGG Orthology	M00011	Citrate cycle; second carbon oxidation; 2-oxoglutarate => oxaloacetate	650	Butanoate metabolism
K00240	sdhB, frdB; succinate dehydrogenase iron-sulfur subunit [EC:1.3.5.1]	ko00001	KEGG Orthology	M00011	Citrate cycle; second carbon oxidation; 2-oxoglutarate => oxaloacetate	720	Carbon fixation pathways in prokaryotes
K00240	sdhB, frdB; succinate dehydrogenase iron-sulfur subunit [EC:1.3.5.1]	ko00001	KEGG Orthology	M00011	Citrate cycle; second carbon oxidation; 2-oxoglutarate => oxaloacetate	1100	Metabolic pathways
K00240	sdhB, frdB; succinate dehydrogenase iron-sulfur subunit [EC:1.3.5.1]	ko00001	KEGG Orthology	M00011	Citrate cycle; second carbon oxidation; 2-oxoglutarate => oxaloacetate	1110	Biosynthesis of secondary metabolites
K00240	sdhB, frdB; succinate dehydrogenase iron-sulfur subunit [EC:1.3.5.1]	ko00001	KEGG Orthology	M00011	Citrate cycle; second carbon oxidation; 2-oxoglutarate => oxaloacetate	1120	Microbial metabolism in diverse environments
K00240	sdhB, frdB; succinate dehydrogenase iron-sulfur subunit [EC:1.3.5.1]	ko00001	KEGG Orthology	M00011	Citrate cycle; second carbon oxidation; 2-oxoglutarate => oxaloacetate	1200	Carbon metabolism
K00240	sdhB, frdB; succinate dehydrogenase iron-sulfur subunit [EC:1.3.5.1]	ko00001	KEGG Orthology	M00149	Succinate dehydrogenase; prokaryotes	20	Citrate cycle
K00240	sdhB, frdB; succinate dehydrogenase iron-sulfur subunit [EC:1.3.5.1]	ko00001	KEGG Orthology	M00149	Succinate dehydrogenase; prokaryotes	190	Oxidative phosphorylation
K00240	sdhB, frdB; succinate dehydrogenase iron-sulfur subunit [EC:1.3.5.1]	ko00001	KEGG Orthology	M00149	Succinate dehydrogenase; prokaryotes	650	Butanoate metabolism
K00240	sdhB, frdB; succinate dehydrogenase iron-sulfur subunit [EC:1.3.5.1]	ko00001	KEGG Orthology	M00149	Succinate dehydrogenase; prokaryotes	720	Carbon fixation pathways in prokaryotes
K00240	sdhB, frdB; succinate dehydrogenase iron-sulfur subunit [EC:1.3.5.1]	ko00001	KEGG Orthology	M00149	Succinate dehydrogenase; prokaryotes	1100	Metabolic pathways
K00240	sdhB, frdB; succinate dehydrogenase iron-sulfur subunit [EC:1.3.5.1]	ko00001	KEGG Orthology	M00149	Succinate dehydrogenase; prokaryotes	1110	Biosynthesis of secondary metabolites
K00240	sdhB, frdB; succinate dehydrogenase iron-sulfur subunit [EC:1.3.5.1]	ko00001	KEGG Orthology	M00149	Succinate dehydrogenase; prokaryotes	1120	Microbial metabolism in diverse environments
K00240	sdhB, frdB; succinate dehydrogenase iron-sulfur subunit [EC:1.3.5.1]	ko00001	KEGG Orthology	M00149	Succinate dehydrogenase; prokaryotes	1200	Carbon metabolism
K00240	sdhB, frdB; succinate dehydrogenase iron-sulfur subunit [EC:1.3.5.1]	ko00001	KEGG Orthology	M00173	Reductive citrate cycle	20	Citrate cycle
K00240	sdhB, frdB; succinate dehydrogenase iron-sulfur subunit [EC:1.3.5.1]	ko00001	KEGG Orthology	M00173	Reductive citrate cycle	190	Oxidative phosphorylation
K00240	sdhB, frdB; succinate dehydrogenase iron-sulfur subunit [EC:1.3.5.1]	ko00001	KEGG Orthology	M00173	Reductive citrate cycle	650	Butanoate metabolism
K00240	sdhB, frdB; succinate dehydrogenase iron-sulfur subunit [EC:1.3.5.1]	ko00001	KEGG Orthology	M00173	Reductive citrate cycle	720	Carbon fixation pathways in prokaryotes
K00240	sdhB, frdB; succinate dehydrogenase iron-sulfur subunit [EC:1.3.5.1]	ko00001	KEGG Orthology	M00173	Reductive citrate cycle	1100	Metabolic pathways
K00240	sdhB, frdB; succinate dehydrogenase iron-sulfur subunit [EC:1.3.5.1]	ko00001	KEGG Orthology	M00173	Reductive citrate cycle	1110	Biosynthesis of secondary metabolites
K00240	sdhB, frdB; succinate dehydrogenase iron-sulfur subunit [EC:1.3.5.1]	ko00001	KEGG Orthology	M00173	Reductive citrate cycle	1120	Microbial metabolism in diverse environments
K00240	sdhB, frdB; succinate dehydrogenase iron-sulfur subunit [EC:1.3.5.1]	ko00001	KEGG Orthology	M00173	Reductive citrate cycle	1200	Carbon metabolism
K00240	sdhB, frdB; succinate dehydrogenase iron-sulfur subunit [EC:1.3.5.1]	ko00001	KEGG Orthology	M00374	Dicarboxylate-hydroxybutyrate cycle	20	Citrate cycle
K00240	sdhB, frdB; succinate dehydrogenase iron-sulfur subunit [EC:1.3.5.1]	ko00001	KEGG Orthology	M00374	Dicarboxylate-hydroxybutyrate cycle	190	Oxidative phosphorylation
K00240	sdhB, frdB; succinate dehydrogenase iron-sulfur subunit [EC:1.3.5.1]	ko00001	KEGG Orthology	M00374	Dicarboxylate-hydroxybutyrate cycle	650	Butanoate metabolism
K00240	sdhB, frdB; succinate dehydrogenase iron-sulfur subunit [EC:1.3.5.1]	ko00001	KEGG Orthology	M00374	Dicarboxylate-hydroxybutyrate cycle	720	Carbon fixation pathways in prokaryotes
K00240	sdhB, frdB; succinate dehydrogenase iron-sulfur subunit [EC:1.3.5.1]	ko00001	KEGG Orthology	M00374	Dicarboxylate-hydroxybutyrate cycle	1100	Metabolic pathways
K00240	sdhB, frdB; succinate dehydrogenase iron-sulfur subunit [EC:1.3.5.1]	ko00001	KEGG Orthology	M00374	Dicarboxylate-hydroxybutyrate cycle	1110	Biosynthesis of secondary metabolites
K00240	sdhB, frdB; succinate dehydrogenase iron-sulfur subunit [EC:1.3.5.1]	ko00001	KEGG Orthology	M00374	Dicarboxylate-hydroxybutyrate cycle	1120	Microbial metabolism in diverse environments
K00240	sdhB, frdB; succinate dehydrogenase iron-sulfur subunit [EC:1.3.5.1]	ko00001	KEGG Orthology	M00374	Dicarboxylate-hydroxybutyrate cycle	1200	Carbon metabolism
K00240	sdhB, frdB; succinate dehydrogenase iron-sulfur subunit [EC:1.3.5.1]	ko00001	KEGG Orthology	M00376	3-Hydroxypropionate bi-cycle	20	Citrate cycle
K00240	sdhB, frdB; succinate dehydrogenase iron-sulfur subunit [EC:1.3.5.1]	ko00001	KEGG Orthology	M00376	3-Hydroxypropionate bi-cycle	190	Oxidative phosphorylation
K00240	sdhB, frdB; succinate dehydrogenase iron-sulfur subunit [EC:1.3.5.1]	ko00001	KEGG Orthology	M00376	3-Hydroxypropionate bi-cycle	650	Butanoate metabolism
K00240	sdhB, frdB; succinate dehydrogenase iron-sulfur subunit [EC:1.3.5.1]	ko00001	KEGG Orthology	M00376	3-Hydroxypropionate bi-cycle	720	Carbon fixation pathways in prokaryotes
K00240	sdhB, frdB; succinate dehydrogenase iron-sulfur subunit [EC:1.3.5.1]	ko00001	KEGG Orthology	M00376	3-Hydroxypropionate bi-cycle	1100	Metabolic pathways
K00240	sdhB, frdB; succinate dehydrogenase iron-sulfur subunit [EC:1.3.5.1]	ko00001	KEGG Orthology	M00376	3-Hydroxypropionate bi-cycle	1110	Biosynthesis of secondary metabolites
K00240	sdhB, frdB; succinate dehydrogenase iron-sulfur subunit [EC:1.3.5.1]	ko00001	KEGG Orthology	M00376	3-Hydroxypropionate bi-cycle	1120	Microbial metabolism in diverse environments
K00240	sdhB, frdB; succinate dehydrogenase iron-sulfur subunit [EC:1.3.5.1]	ko00001	KEGG Orthology	M00376	3-Hydroxypropionate bi-cycle	1200	Carbon metabolism
K00241	sdhC, frdC; succinate dehydrogenase cytochrome b subunit	ko00001	KEGG Orthology	M00009	Citrate cycle	20	Citrate cycle
K00241	sdhC, frdC; succinate dehydrogenase cytochrome b subunit	ko00001	KEGG Orthology	M00009	Citrate cycle	190	Oxidative phosphorylation
K00241	sdhC, frdC; succinate dehydrogenase cytochrome b subunit	ko00001	KEGG Orthology	M00009	Citrate cycle	650	Butanoate metabolism
K00241	sdhC, frdC; succinate dehydrogenase cytochrome b subunit	ko00001	KEGG Orthology	M00009	Citrate cycle	720	Carbon fixation pathways in prokaryotes
K00241	sdhC, frdC; succinate dehydrogenase cytochrome b subunit	ko00001	KEGG Orthology	M00009	Citrate cycle	1100	Metabolic pathways
K00241	sdhC, frdC; succinate dehydrogenase cytochrome b subunit	ko00001	KEGG Orthology	M00009	Citrate cycle	1110	Biosynthesis of secondary metabolites
K00241	sdhC, frdC; succinate dehydrogenase cytochrome b subunit	ko00001	KEGG Orthology	M00009	Citrate cycle	1120	Microbial metabolism in diverse environments
K00241	sdhC, frdC; succinate dehydrogenase cytochrome b subunit	ko00001	KEGG Orthology	M00009	Citrate cycle	1200	Carbon metabolism
K00241	sdhC, frdC; succinate dehydrogenase cytochrome b subunit	ko00001	KEGG Orthology	M00011	Citrate cycle; second carbon oxidation; 2-oxoglutarate => oxaloacetate	20	Citrate cycle
K00241	sdhC, frdC; succinate dehydrogenase cytochrome b subunit	ko00001	KEGG Orthology	M00011	Citrate cycle; second carbon oxidation; 2-oxoglutarate => oxaloacetate	190	Oxidative phosphorylation
K00241	sdhC, frdC; succinate dehydrogenase cytochrome b subunit	ko00001	KEGG Orthology	M00011	Citrate cycle; second carbon oxidation; 2-oxoglutarate => oxaloacetate	650	Butanoate metabolism
K00241	sdhC, frdC; succinate dehydrogenase cytochrome b subunit	ko00001	KEGG Orthology	M00011	Citrate cycle; second carbon oxidation; 2-oxoglutarate => oxaloacetate	720	Carbon fixation pathways in prokaryotes
K00241	sdhC, frdC; succinate dehydrogenase cytochrome b subunit	ko00001	KEGG Orthology	M00011	Citrate cycle; second carbon oxidation; 2-oxoglutarate => oxaloacetate	1100	Metabolic pathways
K00241	sdhC, frdC; succinate dehydrogenase cytochrome b subunit	ko00001	KEGG Orthology	M00011	Citrate cycle; second carbon oxidation; 2-oxoglutarate => oxaloacetate	1110	Biosynthesis of secondary metabolites
K00241	sdhC, frdC; succinate dehydrogenase cytochrome b subunit	ko00001	KEGG Orthology	M00011	Citrate cycle; second carbon oxidation; 2-oxoglutarate => oxaloacetate	1120	Microbial metabolism in diverse environments
K00241	sdhC, frdC; succinate dehydrogenase cytochrome b subunit	ko00001	KEGG Orthology	M00011	Citrate cycle; second carbon oxidation; 2-oxoglutarate => oxaloacetate	1200	Carbon metabolism
K00241	sdhC, frdC; succinate dehydrogenase cytochrome b subunit	ko00001	KEGG Orthology	M00149	Succinate dehydrogenase; prokaryotes	20	Citrate cycle
K00241	sdhC, frdC; succinate dehydrogenase cytochrome b subunit	ko00001	KEGG Orthology	M00149	Succinate dehydrogenase; prokaryotes	190	Oxidative phosphorylation
K00241	sdhC, frdC; succinate dehydrogenase cytochrome b subunit	ko00001	KEGG Orthology	M00149	Succinate dehydrogenase; prokaryotes	650	Butanoate metabolism
K00241	sdhC, frdC; succinate dehydrogenase cytochrome b subunit	ko00001	KEGG Orthology	M00149	Succinate dehydrogenase; prokaryotes	720	Carbon fixation pathways in prokaryotes
K00241	sdhC, frdC; succinate dehydrogenase cytochrome b subunit	ko00001	KEGG Orthology	M00149	Succinate dehydrogenase; prokaryotes	1100	Metabolic pathways
K00241	sdhC, frdC; succinate dehydrogenase cytochrome b subunit	ko00001	KEGG Orthology	M00149	Succinate dehydrogenase; prokaryotes	1110	Biosynthesis of secondary metabolites
K00241	sdhC, frdC; succinate dehydrogenase cytochrome b subunit	ko00001	KEGG Orthology	M00149	Succinate dehydrogenase; prokaryotes	1120	Microbial metabolism in diverse environments
K00241	sdhC, frdC; succinate dehydrogenase cytochrome b subunit	ko00001	KEGG Orthology	M00149	Succinate dehydrogenase; prokaryotes	1200	Carbon metabolism
K00241	sdhC, frdC; succinate dehydrogenase cytochrome b subunit	ko00001	KEGG Orthology	M00173	Reductive citrate cycle	20	Citrate cycle
K00241	sdhC, frdC; succinate dehydrogenase cytochrome b subunit	ko00001	KEGG Orthology	M00173	Reductive citrate cycle	190	Oxidative phosphorylation
K00241	sdhC, frdC; succinate dehydrogenase cytochrome b subunit	ko00001	KEGG Orthology	M00173	Reductive citrate cycle	650	Butanoate metabolism
K00241	sdhC, frdC; succinate dehydrogenase cytochrome b subunit	ko00001	KEGG Orthology	M00173	Reductive citrate cycle	720	Carbon fixation pathways in prokaryotes
K00241	sdhC, frdC; succinate dehydrogenase cytochrome b subunit	ko00001	KEGG Orthology	M00173	Reductive citrate cycle	1100	Metabolic pathways
K00241	sdhC, frdC; succinate dehydrogenase cytochrome b subunit	ko00001	KEGG Orthology	M00173	Reductive citrate cycle	1110	Biosynthesis of secondary metabolites
K00241	sdhC, frdC; succinate dehydrogenase cytochrome b subunit	ko00001	KEGG Orthology	M00173	Reductive citrate cycle	1120	Microbial metabolism in diverse environments
K00241	sdhC, frdC; succinate dehydrogenase cytochrome b subunit	ko00001	KEGG Orthology	M00173	Reductive citrate cycle	1200	Carbon metabolism
K00241	sdhC, frdC; succinate dehydrogenase cytochrome b subunit	ko00001	KEGG Orthology	M00374	Dicarboxylate-hydroxybutyrate cycle	20	Citrate cycle
K00241	sdhC, frdC; succinate dehydrogenase cytochrome b subunit	ko00001	KEGG Orthology	M00374	Dicarboxylate-hydroxybutyrate cycle	190	Oxidative phosphorylation
K00241	sdhC, frdC; succinate dehydrogenase cytochrome b subunit	ko00001	KEGG Orthology	M00374	Dicarboxylate-hydroxybutyrate cycle	650	Butanoate metabolism
K00241	sdhC, frdC; succinate dehydrogenase cytochrome b subunit	ko00001	KEGG Orthology	M00374	Dicarboxylate-hydroxybutyrate cycle	720	Carbon fixation pathways in prokaryotes
K00241	sdhC, frdC; succinate dehydrogenase cytochrome b subunit	ko00001	KEGG Orthology	M00374	Dicarboxylate-hydroxybutyrate cycle	1100	Metabolic pathways
K00241	sdhC, frdC; succinate dehydrogenase cytochrome b subunit	ko00001	KEGG Orthology	M00374	Dicarboxylate-hydroxybutyrate cycle	1110	Biosynthesis of secondary metabolites
K00241	sdhC, frdC; succinate dehydrogenase cytochrome b subunit	ko00001	KEGG Orthology	M00374	Dicarboxylate-hydroxybutyrate cycle	1120	Microbial metabolism in diverse environments
K00241	sdhC, frdC; succinate dehydrogenase cytochrome b subunit	ko00001	KEGG Orthology	M00374	Dicarboxylate-hydroxybutyrate cycle	1200	Carbon metabolism
K00241	sdhC, frdC; succinate dehydrogenase cytochrome b subunit	ko00001	KEGG Orthology	M00376	3-Hydroxypropionate bi-cycle	20	Citrate cycle
K00241	sdhC, frdC; succinate dehydrogenase cytochrome b subunit	ko00001	KEGG Orthology	M00376	3-Hydroxypropionate bi-cycle	190	Oxidative phosphorylation
K00241	sdhC, frdC; succinate dehydrogenase cytochrome b subunit	ko00001	KEGG Orthology	M00376	3-Hydroxypropionate bi-cycle	650	Butanoate metabolism
K00241	sdhC, frdC; succinate dehydrogenase cytochrome b subunit	ko00001	KEGG Orthology	M00376	3-Hydroxypropionate bi-cycle	720	Carbon fixation pathways in prokaryotes
K00241	sdhC, frdC; succinate dehydrogenase cytochrome b subunit	ko00001	KEGG Orthology	M00376	3-Hydroxypropionate bi-cycle	1100	Metabolic pathways
K00241	sdhC, frdC; succinate dehydrogenase cytochrome b subunit	ko00001	KEGG Orthology	M00376	3-Hydroxypropionate bi-cycle	1110	Biosynthesis of secondary metabolites
K00241	sdhC, frdC; succinate dehydrogenase cytochrome b subunit	ko00001	KEGG Orthology	M00376	3-Hydroxypropionate bi-cycle	1120	Microbial metabolism in diverse environments
K00241	sdhC, frdC; succinate dehydrogenase cytochrome b subunit	ko00001	KEGG Orthology	M00376	3-Hydroxypropionate bi-cycle	1200	Carbon metabolism
K00242	sdhD, frdD; succinate dehydrogenase membrane anchor subunit	ko00001	KEGG Orthology	M00009	Citrate cycle	20	Citrate cycle
K00242	sdhD, frdD; succinate dehydrogenase membrane anchor subunit	ko00001	KEGG Orthology	M00009	Citrate cycle	190	Oxidative phosphorylation
K00242	sdhD, frdD; succinate dehydrogenase membrane anchor subunit	ko00001	KEGG Orthology	M00009	Citrate cycle	650	Butanoate metabolism
K00242	sdhD, frdD; succinate dehydrogenase membrane anchor subunit	ko00001	KEGG Orthology	M00009	Citrate cycle	720	Carbon fixation pathways in prokaryotes
K00242	sdhD, frdD; succinate dehydrogenase membrane anchor subunit	ko00001	KEGG Orthology	M00009	Citrate cycle	1100	Metabolic pathways
K00242	sdhD, frdD; succinate dehydrogenase membrane anchor subunit	ko00001	KEGG Orthology	M00009	Citrate cycle	1110	Biosynthesis of secondary metabolites
K00242	sdhD, frdD; succinate dehydrogenase membrane anchor subunit	ko00001	KEGG Orthology	M00009	Citrate cycle	1120	Microbial metabolism in diverse environments
K00242	sdhD, frdD; succinate dehydrogenase membrane anchor subunit	ko00001	KEGG Orthology	M00009	Citrate cycle	1200	Carbon metabolism
K00242	sdhD, frdD; succinate dehydrogenase membrane anchor subunit	ko00001	KEGG Orthology	M00011	Citrate cycle; second carbon oxidation; 2-oxoglutarate => oxaloacetate	20	Citrate cycle
K00242	sdhD, frdD; succinate dehydrogenase membrane anchor subunit	ko00001	KEGG Orthology	M00011	Citrate cycle; second carbon oxidation; 2-oxoglutarate => oxaloacetate	190	Oxidative phosphorylation
K00242	sdhD, frdD; succinate dehydrogenase membrane anchor subunit	ko00001	KEGG Orthology	M00011	Citrate cycle; second carbon oxidation; 2-oxoglutarate => oxaloacetate	650	Butanoate metabolism
K00242	sdhD, frdD; succinate dehydrogenase membrane anchor subunit	ko00001	KEGG Orthology	M00011	Citrate cycle; second carbon oxidation; 2-oxoglutarate => oxaloacetate	720	Carbon fixation pathways in prokaryotes
K00242	sdhD, frdD; succinate dehydrogenase membrane anchor subunit	ko00001	KEGG Orthology	M00011	Citrate cycle; second carbon oxidation; 2-oxoglutarate => oxaloacetate	1100	Metabolic pathways
K00242	sdhD, frdD; succinate dehydrogenase membrane anchor subunit	ko00001	KEGG Orthology	M00011	Citrate cycle; second carbon oxidation; 2-oxoglutarate => oxaloacetate	1110	Biosynthesis of secondary metabolites
K00242	sdhD, frdD; succinate dehydrogenase membrane anchor subunit	ko00001	KEGG Orthology	M00011	Citrate cycle; second carbon oxidation; 2-oxoglutarate => oxaloacetate	1120	Microbial metabolism in diverse environments
K00242	sdhD, frdD; succinate dehydrogenase membrane anchor subunit	ko00001	KEGG Orthology	M00011	Citrate cycle; second carbon oxidation; 2-oxoglutarate => oxaloacetate	1200	Carbon metabolism
K00242	sdhD, frdD; succinate dehydrogenase membrane anchor subunit	ko00001	KEGG Orthology	M00149	Succinate dehydrogenase; prokaryotes	20	Citrate cycle
K00242	sdhD, frdD; succinate dehydrogenase membrane anchor subunit	ko00001	KEGG Orthology	M00149	Succinate dehydrogenase; prokaryotes	190	Oxidative phosphorylation
K00242	sdhD, frdD; succinate dehydrogenase membrane anchor subunit	ko00001	KEGG Orthology	M00149	Succinate dehydrogenase; prokaryotes	650	Butanoate metabolism
K00242	sdhD, frdD; succinate dehydrogenase membrane anchor subunit	ko00001	KEGG Orthology	M00149	Succinate dehydrogenase; prokaryotes	720	Carbon fixation pathways in prokaryotes
K00242	sdhD, frdD; succinate dehydrogenase membrane anchor subunit	ko00001	KEGG Orthology	M00149	Succinate dehydrogenase; prokaryotes	1100	Metabolic pathways
K00242	sdhD, frdD; succinate dehydrogenase membrane anchor subunit	ko00001	KEGG Orthology	M00149	Succinate dehydrogenase; prokaryotes	1110	Biosynthesis of secondary metabolites
K00242	sdhD, frdD; succinate dehydrogenase membrane anchor subunit	ko00001	KEGG Orthology	M00149	Succinate dehydrogenase; prokaryotes	1120	Microbial metabolism in diverse environments
K00242	sdhD, frdD; succinate dehydrogenase membrane anchor subunit	ko00001	KEGG Orthology	M00149	Succinate dehydrogenase; prokaryotes	1200	Carbon metabolism
K00242	sdhD, frdD; succinate dehydrogenase membrane anchor subunit	ko00001	KEGG Orthology	M00173	Reductive citrate cycle	20	Citrate cycle
K00242	sdhD, frdD; succinate dehydrogenase membrane anchor subunit	ko00001	KEGG Orthology	M00173	Reductive citrate cycle	190	Oxidative phosphorylation
K00242	sdhD, frdD; succinate dehydrogenase membrane anchor subunit	ko00001	KEGG Orthology	M00173	Reductive citrate cycle	650	Butanoate metabolism
K00242	sdhD, frdD; succinate dehydrogenase membrane anchor subunit	ko00001	KEGG Orthology	M00173	Reductive citrate cycle	720	Carbon fixation pathways in prokaryotes
K00242	sdhD, frdD; succinate dehydrogenase membrane anchor subunit	ko00001	KEGG Orthology	M00173	Reductive citrate cycle	1100	Metabolic pathways
K00242	sdhD, frdD; succinate dehydrogenase membrane anchor subunit	ko00001	KEGG Orthology	M00173	Reductive citrate cycle	1110	Biosynthesis of secondary metabolites
K00242	sdhD, frdD; succinate dehydrogenase membrane anchor subunit	ko00001	KEGG Orthology	M00173	Reductive citrate cycle	1120	Microbial metabolism in diverse environments
K00242	sdhD, frdD; succinate dehydrogenase membrane anchor subunit	ko00001	KEGG Orthology	M00173	Reductive citrate cycle	1200	Carbon metabolism
K00243	K00243; uncharacterized protein	ko00001	KEGG Orthology	NA	NA	NA	NA
K00244	frdA; succinate dehydrogenase flavoprotein subunit [EC:1.3.5.1]	ko00001	KEGG Orthology	M00009	Citrate cycle	20	Citrate cycle
K00244	frdA; succinate dehydrogenase flavoprotein subunit [EC:1.3.5.1]	ko00001	KEGG Orthology	M00009	Citrate cycle	190	Oxidative phosphorylation
K00244	frdA; succinate dehydrogenase flavoprotein subunit [EC:1.3.5.1]	ko00001	KEGG Orthology	M00009	Citrate cycle	620	Pyruvate metabolism
K00244	frdA; succinate dehydrogenase flavoprotein subunit [EC:1.3.5.1]	ko00001	KEGG Orthology	M00009	Citrate cycle	650	Butanoate metabolism
K00244	frdA; succinate dehydrogenase flavoprotein subunit [EC:1.3.5.1]	ko00001	KEGG Orthology	M00009	Citrate cycle	720	Carbon fixation pathways in prokaryotes
K00244	frdA; succinate dehydrogenase flavoprotein subunit [EC:1.3.5.1]	ko00001	KEGG Orthology	M00009	Citrate cycle	1100	Metabolic pathways
K00244	frdA; succinate dehydrogenase flavoprotein subunit [EC:1.3.5.1]	ko00001	KEGG Orthology	M00009	Citrate cycle	1110	Biosynthesis of secondary metabolites
K00244	frdA; succinate dehydrogenase flavoprotein subunit [EC:1.3.5.1]	ko00001	KEGG Orthology	M00009	Citrate cycle	1120	Microbial metabolism in diverse environments
K00244	frdA; succinate dehydrogenase flavoprotein subunit [EC:1.3.5.1]	ko00001	KEGG Orthology	M00009	Citrate cycle	1200	Carbon metabolism
K00244	frdA; succinate dehydrogenase flavoprotein subunit [EC:1.3.5.1]	ko00001	KEGG Orthology	M00009	Citrate cycle	2020	Two-component system
K00244	frdA; succinate dehydrogenase flavoprotein subunit [EC:1.3.5.1]	ko00001	KEGG Orthology	M00011	Citrate cycle; second carbon oxidation; 2-oxoglutarate => oxaloacetate	20	Citrate cycle
K00244	frdA; succinate dehydrogenase flavoprotein subunit [EC:1.3.5.1]	ko00001	KEGG Orthology	M00011	Citrate cycle; second carbon oxidation; 2-oxoglutarate => oxaloacetate	190	Oxidative phosphorylation
K00244	frdA; succinate dehydrogenase flavoprotein subunit [EC:1.3.5.1]	ko00001	KEGG Orthology	M00011	Citrate cycle; second carbon oxidation; 2-oxoglutarate => oxaloacetate	620	Pyruvate metabolism
K00244	frdA; succinate dehydrogenase flavoprotein subunit [EC:1.3.5.1]	ko00001	KEGG Orthology	M00011	Citrate cycle; second carbon oxidation; 2-oxoglutarate => oxaloacetate	650	Butanoate metabolism
K00244	frdA; succinate dehydrogenase flavoprotein subunit [EC:1.3.5.1]	ko00001	KEGG Orthology	M00011	Citrate cycle; second carbon oxidation; 2-oxoglutarate => oxaloacetate	720	Carbon fixation pathways in prokaryotes
K00244	frdA; succinate dehydrogenase flavoprotein subunit [EC:1.3.5.1]	ko00001	KEGG Orthology	M00011	Citrate cycle; second carbon oxidation; 2-oxoglutarate => oxaloacetate	1100	Metabolic pathways
K00244	frdA; succinate dehydrogenase flavoprotein subunit [EC:1.3.5.1]	ko00001	KEGG Orthology	M00011	Citrate cycle; second carbon oxidation; 2-oxoglutarate => oxaloacetate	1110	Biosynthesis of secondary metabolites
K00244	frdA; succinate dehydrogenase flavoprotein subunit [EC:1.3.5.1]	ko00001	KEGG Orthology	M00011	Citrate cycle; second carbon oxidation; 2-oxoglutarate => oxaloacetate	1120	Microbial metabolism in diverse environments
K00244	frdA; succinate dehydrogenase flavoprotein subunit [EC:1.3.5.1]	ko00001	KEGG Orthology	M00011	Citrate cycle; second carbon oxidation; 2-oxoglutarate => oxaloacetate	1200	Carbon metabolism
K00244	frdA; succinate dehydrogenase flavoprotein subunit [EC:1.3.5.1]	ko00001	KEGG Orthology	M00011	Citrate cycle; second carbon oxidation; 2-oxoglutarate => oxaloacetate	2020	Two-component system
K00244	frdA; succinate dehydrogenase flavoprotein subunit [EC:1.3.5.1]	ko00001	KEGG Orthology	M00150	Fumarate reductase; prokaryotes	20	Citrate cycle
K00244	frdA; succinate dehydrogenase flavoprotein subunit [EC:1.3.5.1]	ko00001	KEGG Orthology	M00150	Fumarate reductase; prokaryotes	190	Oxidative phosphorylation
K00244	frdA; succinate dehydrogenase flavoprotein subunit [EC:1.3.5.1]	ko00001	KEGG Orthology	M00150	Fumarate reductase; prokaryotes	620	Pyruvate metabolism
K00244	frdA; succinate dehydrogenase flavoprotein subunit [EC:1.3.5.1]	ko00001	KEGG Orthology	M00150	Fumarate reductase; prokaryotes	650	Butanoate metabolism
K00244	frdA; succinate dehydrogenase flavoprotein subunit [EC:1.3.5.1]	ko00001	KEGG Orthology	M00150	Fumarate reductase; prokaryotes	720	Carbon fixation pathways in prokaryotes
K00244	frdA; succinate dehydrogenase flavoprotein subunit [EC:1.3.5.1]	ko00001	KEGG Orthology	M00150	Fumarate reductase; prokaryotes	1100	Metabolic pathways
K00244	frdA; succinate dehydrogenase flavoprotein subunit [EC:1.3.5.1]	ko00001	KEGG Orthology	M00150	Fumarate reductase; prokaryotes	1110	Biosynthesis of secondary metabolites
K00244	frdA; succinate dehydrogenase flavoprotein subunit [EC:1.3.5.1]	ko00001	KEGG Orthology	M00150	Fumarate reductase; prokaryotes	1120	Microbial metabolism in diverse environments
K00244	frdA; succinate dehydrogenase flavoprotein subunit [EC:1.3.5.1]	ko00001	KEGG Orthology	M00150	Fumarate reductase; prokaryotes	1200	Carbon metabolism
K00244	frdA; succinate dehydrogenase flavoprotein subunit [EC:1.3.5.1]	ko00001	KEGG Orthology	M00150	Fumarate reductase; prokaryotes	2020	Two-component system
K00244	frdA; succinate dehydrogenase flavoprotein subunit [EC:1.3.5.1]	ko00001	KEGG Orthology	M00173	Reductive citrate cycle	20	Citrate cycle
K00244	frdA; succinate dehydrogenase flavoprotein subunit [EC:1.3.5.1]	ko00001	KEGG Orthology	M00173	Reductive citrate cycle	190	Oxidative phosphorylation
K00244	frdA; succinate dehydrogenase flavoprotein subunit [EC:1.3.5.1]	ko00001	KEGG Orthology	M00173	Reductive citrate cycle	620	Pyruvate metabolism
K00244	frdA; succinate dehydrogenase flavoprotein subunit [EC:1.3.5.1]	ko00001	KEGG Orthology	M00173	Reductive citrate cycle	650	Butanoate metabolism
K00244	frdA; succinate dehydrogenase flavoprotein subunit [EC:1.3.5.1]	ko00001	KEGG Orthology	M00173	Reductive citrate cycle	720	Carbon fixation pathways in prokaryotes
K00244	frdA; succinate dehydrogenase flavoprotein subunit [EC:1.3.5.1]	ko00001	KEGG Orthology	M00173	Reductive citrate cycle	1100	Metabolic pathways
K00244	frdA; succinate dehydrogenase flavoprotein subunit [EC:1.3.5.1]	ko00001	KEGG Orthology	M00173	Reductive citrate cycle	1110	Biosynthesis of secondary metabolites
K00244	frdA; succinate dehydrogenase flavoprotein subunit [EC:1.3.5.1]	ko00001	KEGG Orthology	M00173	Reductive citrate cycle	1120	Microbial metabolism in diverse environments
K00244	frdA; succinate dehydrogenase flavoprotein subunit [EC:1.3.5.1]	ko00001	KEGG Orthology	M00173	Reductive citrate cycle	1200	Carbon metabolism
K00244	frdA; succinate dehydrogenase flavoprotein subunit [EC:1.3.5.1]	ko00001	KEGG Orthology	M00173	Reductive citrate cycle	2020	Two-component system
K00245	frdB; succinate dehydrogenase iron-sulfur subunit [EC:1.3.5.1]	ko00001	KEGG Orthology	M00009	Citrate cycle	20	Citrate cycle
K00245	frdB; succinate dehydrogenase iron-sulfur subunit [EC:1.3.5.1]	ko00001	KEGG Orthology	M00009	Citrate cycle	190	Oxidative phosphorylation
K00245	frdB; succinate dehydrogenase iron-sulfur subunit [EC:1.3.5.1]	ko00001	KEGG Orthology	M00009	Citrate cycle	620	Pyruvate metabolism
K00245	frdB; succinate dehydrogenase iron-sulfur subunit [EC:1.3.5.1]	ko00001	KEGG Orthology	M00009	Citrate cycle	650	Butanoate metabolism
K00245	frdB; succinate dehydrogenase iron-sulfur subunit [EC:1.3.5.1]	ko00001	KEGG Orthology	M00009	Citrate cycle	720	Carbon fixation pathways in prokaryotes
K00245	frdB; succinate dehydrogenase iron-sulfur subunit [EC:1.3.5.1]	ko00001	KEGG Orthology	M00009	Citrate cycle	1100	Metabolic pathways
K00245	frdB; succinate dehydrogenase iron-sulfur subunit [EC:1.3.5.1]	ko00001	KEGG Orthology	M00009	Citrate cycle	1110	Biosynthesis of secondary metabolites
K00245	frdB; succinate dehydrogenase iron-sulfur subunit [EC:1.3.5.1]	ko00001	KEGG Orthology	M00009	Citrate cycle	1120	Microbial metabolism in diverse environments
K00245	frdB; succinate dehydrogenase iron-sulfur subunit [EC:1.3.5.1]	ko00001	KEGG Orthology	M00009	Citrate cycle	1200	Carbon metabolism
K00245	frdB; succinate dehydrogenase iron-sulfur subunit [EC:1.3.5.1]	ko00001	KEGG Orthology	M00009	Citrate cycle	2020	Two-component system
K00245	frdB; succinate dehydrogenase iron-sulfur subunit [EC:1.3.5.1]	ko00001	KEGG Orthology	M00011	Citrate cycle; second carbon oxidation; 2-oxoglutarate => oxaloacetate	20	Citrate cycle
K00245	frdB; succinate dehydrogenase iron-sulfur subunit [EC:1.3.5.1]	ko00001	KEGG Orthology	M00011	Citrate cycle; second carbon oxidation; 2-oxoglutarate => oxaloacetate	190	Oxidative phosphorylation
K00245	frdB; succinate dehydrogenase iron-sulfur subunit [EC:1.3.5.1]	ko00001	KEGG Orthology	M00011	Citrate cycle; second carbon oxidation; 2-oxoglutarate => oxaloacetate	620	Pyruvate metabolism
K00245	frdB; succinate dehydrogenase iron-sulfur subunit [EC:1.3.5.1]	ko00001	KEGG Orthology	M00011	Citrate cycle; second carbon oxidation; 2-oxoglutarate => oxaloacetate	650	Butanoate metabolism
K00245	frdB; succinate dehydrogenase iron-sulfur subunit [EC:1.3.5.1]	ko00001	KEGG Orthology	M00011	Citrate cycle; second carbon oxidation; 2-oxoglutarate => oxaloacetate	720	Carbon fixation pathways in prokaryotes
K00245	frdB; succinate dehydrogenase iron-sulfur subunit [EC:1.3.5.1]	ko00001	KEGG Orthology	M00011	Citrate cycle; second carbon oxidation; 2-oxoglutarate => oxaloacetate	1100	Metabolic pathways
K00245	frdB; succinate dehydrogenase iron-sulfur subunit [EC:1.3.5.1]	ko00001	KEGG Orthology	M00011	Citrate cycle; second carbon oxidation; 2-oxoglutarate => oxaloacetate	1110	Biosynthesis of secondary metabolites
K00245	frdB; succinate dehydrogenase iron-sulfur subunit [EC:1.3.5.1]	ko00001	KEGG Orthology	M00011	Citrate cycle; second carbon oxidation; 2-oxoglutarate => oxaloacetate	1120	Microbial metabolism in diverse environments
K00245	frdB; succinate dehydrogenase iron-sulfur subunit [EC:1.3.5.1]	ko00001	KEGG Orthology	M00011	Citrate cycle; second carbon oxidation; 2-oxoglutarate => oxaloacetate	1200	Carbon metabolism
K00245	frdB; succinate dehydrogenase iron-sulfur subunit [EC:1.3.5.1]	ko00001	KEGG Orthology	M00011	Citrate cycle; second carbon oxidation; 2-oxoglutarate => oxaloacetate	2020	Two-component system
K00245	frdB; succinate dehydrogenase iron-sulfur subunit [EC:1.3.5.1]	ko00001	KEGG Orthology	M00150	Fumarate reductase; prokaryotes	20	Citrate cycle
K00245	frdB; succinate dehydrogenase iron-sulfur subunit [EC:1.3.5.1]	ko00001	KEGG Orthology	M00150	Fumarate reductase; prokaryotes	190	Oxidative phosphorylation
K00245	frdB; succinate dehydrogenase iron-sulfur subunit [EC:1.3.5.1]	ko00001	KEGG Orthology	M00150	Fumarate reductase; prokaryotes	620	Pyruvate metabolism
K00245	frdB; succinate dehydrogenase iron-sulfur subunit [EC:1.3.5.1]	ko00001	KEGG Orthology	M00150	Fumarate reductase; prokaryotes	650	Butanoate metabolism
K00245	frdB; succinate dehydrogenase iron-sulfur subunit [EC:1.3.5.1]	ko00001	KEGG Orthology	M00150	Fumarate reductase; prokaryotes	720	Carbon fixation pathways in prokaryotes
K00245	frdB; succinate dehydrogenase iron-sulfur subunit [EC:1.3.5.1]	ko00001	KEGG Orthology	M00150	Fumarate reductase; prokaryotes	1100	Metabolic pathways
K00245	frdB; succinate dehydrogenase iron-sulfur subunit [EC:1.3.5.1]	ko00001	KEGG Orthology	M00150	Fumarate reductase; prokaryotes	1110	Biosynthesis of secondary metabolites
K00245	frdB; succinate dehydrogenase iron-sulfur subunit [EC:1.3.5.1]	ko00001	KEGG Orthology	M00150	Fumarate reductase; prokaryotes	1120	Microbial metabolism in diverse environments
K00245	frdB; succinate dehydrogenase iron-sulfur subunit [EC:1.3.5.1]	ko00001	KEGG Orthology	M00150	Fumarate reductase; prokaryotes	1200	Carbon metabolism
K00245	frdB; succinate dehydrogenase iron-sulfur subunit [EC:1.3.5.1]	ko00001	KEGG Orthology	M00150	Fumarate reductase; prokaryotes	2020	Two-component system
K00245	frdB; succinate dehydrogenase iron-sulfur subunit [EC:1.3.5.1]	ko00001	KEGG Orthology	M00173	Reductive citrate cycle	20	Citrate cycle
K00245	frdB; succinate dehydrogenase iron-sulfur subunit [EC:1.3.5.1]	ko00001	KEGG Orthology	M00173	Reductive citrate cycle	190	Oxidative phosphorylation
K00245	frdB; succinate dehydrogenase iron-sulfur subunit [EC:1.3.5.1]	ko00001	KEGG Orthology	M00173	Reductive citrate cycle	620	Pyruvate metabolism
K00245	frdB; succinate dehydrogenase iron-sulfur subunit [EC:1.3.5.1]	ko00001	KEGG Orthology	M00173	Reductive citrate cycle	650	Butanoate metabolism
K00245	frdB; succinate dehydrogenase iron-sulfur subunit [EC:1.3.5.1]	ko00001	KEGG Orthology	M00173	Reductive citrate cycle	720	Carbon fixation pathways in prokaryotes
K00245	frdB; succinate dehydrogenase iron-sulfur subunit [EC:1.3.5.1]	ko00001	KEGG Orthology	M00173	Reductive citrate cycle	1100	Metabolic pathways
K00245	frdB; succinate dehydrogenase iron-sulfur subunit [EC:1.3.5.1]	ko00001	KEGG Orthology	M00173	Reductive citrate cycle	1110	Biosynthesis of secondary metabolites
K00245	frdB; succinate dehydrogenase iron-sulfur subunit [EC:1.3.5.1]	ko00001	KEGG Orthology	M00173	Reductive citrate cycle	1120	Microbial metabolism in diverse environments
K00245	frdB; succinate dehydrogenase iron-sulfur subunit [EC:1.3.5.1]	ko00001	KEGG Orthology	M00173	Reductive citrate cycle	1200	Carbon metabolism
K00245	frdB; succinate dehydrogenase iron-sulfur subunit [EC:1.3.5.1]	ko00001	KEGG Orthology	M00173	Reductive citrate cycle	2020	Two-component system
K00246	frdC; succinate dehydrogenase subunit C	ko00001	KEGG Orthology	M00009	Citrate cycle	20	Citrate cycle
K00246	frdC; succinate dehydrogenase subunit C	ko00001	KEGG Orthology	M00009	Citrate cycle	190	Oxidative phosphorylation
K00246	frdC; succinate dehydrogenase subunit C	ko00001	KEGG Orthology	M00009	Citrate cycle	620	Pyruvate metabolism
K00246	frdC; succinate dehydrogenase subunit C	ko00001	KEGG Orthology	M00009	Citrate cycle	650	Butanoate metabolism
K00246	frdC; succinate dehydrogenase subunit C	ko00001	KEGG Orthology	M00009	Citrate cycle	720	Carbon fixation pathways in prokaryotes
K00246	frdC; succinate dehydrogenase subunit C	ko00001	KEGG Orthology	M00009	Citrate cycle	1100	Metabolic pathways
K00246	frdC; succinate dehydrogenase subunit C	ko00001	KEGG Orthology	M00009	Citrate cycle	1110	Biosynthesis of secondary metabolites
K00246	frdC; succinate dehydrogenase subunit C	ko00001	KEGG Orthology	M00009	Citrate cycle	1120	Microbial metabolism in diverse environments
K00246	frdC; succinate dehydrogenase subunit C	ko00001	KEGG Orthology	M00009	Citrate cycle	1200	Carbon metabolism
K00246	frdC; succinate dehydrogenase subunit C	ko00001	KEGG Orthology	M00009	Citrate cycle	2020	Two-component system
K00246	frdC; succinate dehydrogenase subunit C	ko00001	KEGG Orthology	M00011	Citrate cycle; second carbon oxidation; 2-oxoglutarate => oxaloacetate	20	Citrate cycle
K00246	frdC; succinate dehydrogenase subunit C	ko00001	KEGG Orthology	M00011	Citrate cycle; second carbon oxidation; 2-oxoglutarate => oxaloacetate	190	Oxidative phosphorylation
K00246	frdC; succinate dehydrogenase subunit C	ko00001	KEGG Orthology	M00011	Citrate cycle; second carbon oxidation; 2-oxoglutarate => oxaloacetate	620	Pyruvate metabolism
K00246	frdC; succinate dehydrogenase subunit C	ko00001	KEGG Orthology	M00011	Citrate cycle; second carbon oxidation; 2-oxoglutarate => oxaloacetate	650	Butanoate metabolism
K00246	frdC; succinate dehydrogenase subunit C	ko00001	KEGG Orthology	M00011	Citrate cycle; second carbon oxidation; 2-oxoglutarate => oxaloacetate	720	Carbon fixation pathways in prokaryotes
K00246	frdC; succinate dehydrogenase subunit C	ko00001	KEGG Orthology	M00011	Citrate cycle; second carbon oxidation; 2-oxoglutarate => oxaloacetate	1100	Metabolic pathways
K00246	frdC; succinate dehydrogenase subunit C	ko00001	KEGG Orthology	M00011	Citrate cycle; second carbon oxidation; 2-oxoglutarate => oxaloacetate	1110	Biosynthesis of secondary metabolites
K00246	frdC; succinate dehydrogenase subunit C	ko00001	KEGG Orthology	M00011	Citrate cycle; second carbon oxidation; 2-oxoglutarate => oxaloacetate	1120	Microbial metabolism in diverse environments
K00246	frdC; succinate dehydrogenase subunit C	ko00001	KEGG Orthology	M00011	Citrate cycle; second carbon oxidation; 2-oxoglutarate => oxaloacetate	1200	Carbon metabolism
K00246	frdC; succinate dehydrogenase subunit C	ko00001	KEGG Orthology	M00011	Citrate cycle; second carbon oxidation; 2-oxoglutarate => oxaloacetate	2020	Two-component system
K00246	frdC; succinate dehydrogenase subunit C	ko00001	KEGG Orthology	M00150	Fumarate reductase; prokaryotes	20	Citrate cycle
K00246	frdC; succinate dehydrogenase subunit C	ko00001	KEGG Orthology	M00150	Fumarate reductase; prokaryotes	190	Oxidative phosphorylation
K00246	frdC; succinate dehydrogenase subunit C	ko00001	KEGG Orthology	M00150	Fumarate reductase; prokaryotes	620	Pyruvate metabolism
K00246	frdC; succinate dehydrogenase subunit C	ko00001	KEGG Orthology	M00150	Fumarate reductase; prokaryotes	650	Butanoate metabolism
K00246	frdC; succinate dehydrogenase subunit C	ko00001	KEGG Orthology	M00150	Fumarate reductase; prokaryotes	720	Carbon fixation pathways in prokaryotes
K00246	frdC; succinate dehydrogenase subunit C	ko00001	KEGG Orthology	M00150	Fumarate reductase; prokaryotes	1100	Metabolic pathways
K00246	frdC; succinate dehydrogenase subunit C	ko00001	KEGG Orthology	M00150	Fumarate reductase; prokaryotes	1110	Biosynthesis of secondary metabolites
K00246	frdC; succinate dehydrogenase subunit C	ko00001	KEGG Orthology	M00150	Fumarate reductase; prokaryotes	1120	Microbial metabolism in diverse environments
K00246	frdC; succinate dehydrogenase subunit C	ko00001	KEGG Orthology	M00150	Fumarate reductase; prokaryotes	1200	Carbon metabolism
K00246	frdC; succinate dehydrogenase subunit C	ko00001	KEGG Orthology	M00150	Fumarate reductase; prokaryotes	2020	Two-component system
K00246	frdC; succinate dehydrogenase subunit C	ko00001	KEGG Orthology	M00173	Reductive citrate cycle	20	Citrate cycle
K00246	frdC; succinate dehydrogenase subunit C	ko00001	KEGG Orthology	M00173	Reductive citrate cycle	190	Oxidative phosphorylation
K00246	frdC; succinate dehydrogenase subunit C	ko00001	KEGG Orthology	M00173	Reductive citrate cycle	620	Pyruvate metabolism
K00246	frdC; succinate dehydrogenase subunit C	ko00001	KEGG Orthology	M00173	Reductive citrate cycle	650	Butanoate metabolism
K00246	frdC; succinate dehydrogenase subunit C	ko00001	KEGG Orthology	M00173	Reductive citrate cycle	720	Carbon fixation pathways in prokaryotes
K00246	frdC; succinate dehydrogenase subunit C	ko00001	KEGG Orthology	M00173	Reductive citrate cycle	1100	Metabolic pathways
K00246	frdC; succinate dehydrogenase subunit C	ko00001	KEGG Orthology	M00173	Reductive citrate cycle	1110	Biosynthesis of secondary metabolites
K00246	frdC; succinate dehydrogenase subunit C	ko00001	KEGG Orthology	M00173	Reductive citrate cycle	1120	Microbial metabolism in diverse environments
K00246	frdC; succinate dehydrogenase subunit C	ko00001	KEGG Orthology	M00173	Reductive citrate cycle	1200	Carbon metabolism
K00246	frdC; succinate dehydrogenase subunit C	ko00001	KEGG Orthology	M00173	Reductive citrate cycle	2020	Two-component system
K00247	frdD; succinate dehydrogenase subunit D	ko00001	KEGG Orthology	M00009	Citrate cycle	20	Citrate cycle
K00247	frdD; succinate dehydrogenase subunit D	ko00001	KEGG Orthology	M00009	Citrate cycle	190	Oxidative phosphorylation
K00247	frdD; succinate dehydrogenase subunit D	ko00001	KEGG Orthology	M00009	Citrate cycle	620	Pyruvate metabolism
K00247	frdD; succinate dehydrogenase subunit D	ko00001	KEGG Orthology	M00009	Citrate cycle	650	Butanoate metabolism
K00247	frdD; succinate dehydrogenase subunit D	ko00001	KEGG Orthology	M00009	Citrate cycle	720	Carbon fixation pathways in prokaryotes
K00247	frdD; succinate dehydrogenase subunit D	ko00001	KEGG Orthology	M00009	Citrate cycle	1100	Metabolic pathways
K00247	frdD; succinate dehydrogenase subunit D	ko00001	KEGG Orthology	M00009	Citrate cycle	1110	Biosynthesis of secondary metabolites
K00247	frdD; succinate dehydrogenase subunit D	ko00001	KEGG Orthology	M00009	Citrate cycle	1120	Microbial metabolism in diverse environments
K00247	frdD; succinate dehydrogenase subunit D	ko00001	KEGG Orthology	M00009	Citrate cycle	1200	Carbon metabolism
K00247	frdD; succinate dehydrogenase subunit D	ko00001	KEGG Orthology	M00009	Citrate cycle	2020	Two-component system
K00247	frdD; succinate dehydrogenase subunit D	ko00001	KEGG Orthology	M00011	Citrate cycle; second carbon oxidation; 2-oxoglutarate => oxaloacetate	20	Citrate cycle
K00247	frdD; succinate dehydrogenase subunit D	ko00001	KEGG Orthology	M00011	Citrate cycle; second carbon oxidation; 2-oxoglutarate => oxaloacetate	190	Oxidative phosphorylation
K00247	frdD; succinate dehydrogenase subunit D	ko00001	KEGG Orthology	M00011	Citrate cycle; second carbon oxidation; 2-oxoglutarate => oxaloacetate	620	Pyruvate metabolism
K00247	frdD; succinate dehydrogenase subunit D	ko00001	KEGG Orthology	M00011	Citrate cycle; second carbon oxidation; 2-oxoglutarate => oxaloacetate	650	Butanoate metabolism
K00247	frdD; succinate dehydrogenase subunit D	ko00001	KEGG Orthology	M00011	Citrate cycle; second carbon oxidation; 2-oxoglutarate => oxaloacetate	720	Carbon fixation pathways in prokaryotes
K00247	frdD; succinate dehydrogenase subunit D	ko00001	KEGG Orthology	M00011	Citrate cycle; second carbon oxidation; 2-oxoglutarate => oxaloacetate	1100	Metabolic pathways
K00247	frdD; succinate dehydrogenase subunit D	ko00001	KEGG Orthology	M00011	Citrate cycle; second carbon oxidation; 2-oxoglutarate => oxaloacetate	1110	Biosynthesis of secondary metabolites
K00247	frdD; succinate dehydrogenase subunit D	ko00001	KEGG Orthology	M00011	Citrate cycle; second carbon oxidation; 2-oxoglutarate => oxaloacetate	1120	Microbial metabolism in diverse environments
K00247	frdD; succinate dehydrogenase subunit D	ko00001	KEGG Orthology	M00011	Citrate cycle; second carbon oxidation; 2-oxoglutarate => oxaloacetate	1200	Carbon metabolism
K00247	frdD; succinate dehydrogenase subunit D	ko00001	KEGG Orthology	M00011	Citrate cycle; second carbon oxidation; 2-oxoglutarate => oxaloacetate	2020	Two-component system
K00247	frdD; succinate dehydrogenase subunit D	ko00001	KEGG Orthology	M00150	Fumarate reductase; prokaryotes	20	Citrate cycle
K00247	frdD; succinate dehydrogenase subunit D	ko00001	KEGG Orthology	M00150	Fumarate reductase; prokaryotes	190	Oxidative phosphorylation
K00247	frdD; succinate dehydrogenase subunit D	ko00001	KEGG Orthology	M00150	Fumarate reductase; prokaryotes	620	Pyruvate metabolism
K00247	frdD; succinate dehydrogenase subunit D	ko00001	KEGG Orthology	M00150	Fumarate reductase; prokaryotes	650	Butanoate metabolism
K00247	frdD; succinate dehydrogenase subunit D	ko00001	KEGG Orthology	M00150	Fumarate reductase; prokaryotes	720	Carbon fixation pathways in prokaryotes
K00247	frdD; succinate dehydrogenase subunit D	ko00001	KEGG Orthology	M00150	Fumarate reductase; prokaryotes	1100	Metabolic pathways
K00247	frdD; succinate dehydrogenase subunit D	ko00001	KEGG Orthology	M00150	Fumarate reductase; prokaryotes	1110	Biosynthesis of secondary metabolites
K00247	frdD; succinate dehydrogenase subunit D	ko00001	KEGG Orthology	M00150	Fumarate reductase; prokaryotes	1120	Microbial metabolism in diverse environments
K00247	frdD; succinate dehydrogenase subunit D	ko00001	KEGG Orthology	M00150	Fumarate reductase; prokaryotes	1200	Carbon metabolism
K00247	frdD; succinate dehydrogenase subunit D	ko00001	KEGG Orthology	M00150	Fumarate reductase; prokaryotes	2020	Two-component system
K00247	frdD; succinate dehydrogenase subunit D	ko00001	KEGG Orthology	M00173	Reductive citrate cycle	20	Citrate cycle
K00247	frdD; succinate dehydrogenase subunit D	ko00001	KEGG Orthology	M00173	Reductive citrate cycle	190	Oxidative phosphorylation
K00247	frdD; succinate dehydrogenase subunit D	ko00001	KEGG Orthology	M00173	Reductive citrate cycle	620	Pyruvate metabolism
K00247	frdD; succinate dehydrogenase subunit D	ko00001	KEGG Orthology	M00173	Reductive citrate cycle	650	Butanoate metabolism
K00247	frdD; succinate dehydrogenase subunit D	ko00001	KEGG Orthology	M00173	Reductive citrate cycle	720	Carbon fixation pathways in prokaryotes
K00247	frdD; succinate dehydrogenase subunit D	ko00001	KEGG Orthology	M00173	Reductive citrate cycle	1100	Metabolic pathways
K00247	frdD; succinate dehydrogenase subunit D	ko00001	KEGG Orthology	M00173	Reductive citrate cycle	1110	Biosynthesis of secondary metabolites
K00247	frdD; succinate dehydrogenase subunit D	ko00001	KEGG Orthology	M00173	Reductive citrate cycle	1120	Microbial metabolism in diverse environments
K00247	frdD; succinate dehydrogenase subunit D	ko00001	KEGG Orthology	M00173	Reductive citrate cycle	1200	Carbon metabolism
K00247	frdD; succinate dehydrogenase subunit D	ko00001	KEGG Orthology	M00173	Reductive citrate cycle	2020	Two-component system
K00248	ACADS, bcd; butyryl-CoA dehydrogenase [EC:1.3.8.1]	ko00001	KEGG Orthology	M00013	Malonate semialdehyde pathway; propanoyl-CoA => acetyl-CoA	71	Fatty acid degradation
K00248	ACADS, bcd; butyryl-CoA dehydrogenase [EC:1.3.8.1]	ko00001	KEGG Orthology	M00013	Malonate semialdehyde pathway; propanoyl-CoA => acetyl-CoA	280	Valine; leucine and isoleucine degradation
K00248	ACADS, bcd; butyryl-CoA dehydrogenase [EC:1.3.8.1]	ko00001	KEGG Orthology	M00013	Malonate semialdehyde pathway; propanoyl-CoA => acetyl-CoA	410	beta-Alanine metabolism
K00248	ACADS, bcd; butyryl-CoA dehydrogenase [EC:1.3.8.1]	ko00001	KEGG Orthology	M00013	Malonate semialdehyde pathway; propanoyl-CoA => acetyl-CoA	640	Propanoate metabolism
K00248	ACADS, bcd; butyryl-CoA dehydrogenase [EC:1.3.8.1]	ko00001	KEGG Orthology	M00013	Malonate semialdehyde pathway; propanoyl-CoA => acetyl-CoA	650	Butanoate metabolism
K00248	ACADS, bcd; butyryl-CoA dehydrogenase [EC:1.3.8.1]	ko00001	KEGG Orthology	M00013	Malonate semialdehyde pathway; propanoyl-CoA => acetyl-CoA	1100	Metabolic pathways
K00248	ACADS, bcd; butyryl-CoA dehydrogenase [EC:1.3.8.1]	ko00001	KEGG Orthology	M00013	Malonate semialdehyde pathway; propanoyl-CoA => acetyl-CoA	1110	Biosynthesis of secondary metabolites
K00248	ACADS, bcd; butyryl-CoA dehydrogenase [EC:1.3.8.1]	ko00001	KEGG Orthology	M00013	Malonate semialdehyde pathway; propanoyl-CoA => acetyl-CoA	1120	Microbial metabolism in diverse environments
K00248	ACADS, bcd; butyryl-CoA dehydrogenase [EC:1.3.8.1]	ko00001	KEGG Orthology	M00013	Malonate semialdehyde pathway; propanoyl-CoA => acetyl-CoA	1200	Carbon metabolism
K00248	ACADS, bcd; butyryl-CoA dehydrogenase [EC:1.3.8.1]	ko00001	KEGG Orthology	M00013	Malonate semialdehyde pathway; propanoyl-CoA => acetyl-CoA	1212	Fatty acid metabolism
K00249	ACADM, acd; acyl-CoA dehydrogenase [EC:1.3.8.7]	ko00001	KEGG Orthology	M00036	Leucine degradation; leucine => acetoacetate + acetyl-CoA	71	Fatty acid degradation
K00249	ACADM, acd; acyl-CoA dehydrogenase [EC:1.3.8.7]	ko00001	KEGG Orthology	M00036	Leucine degradation; leucine => acetoacetate + acetyl-CoA	280	Valine; leucine and isoleucine degradation
K00249	ACADM, acd; acyl-CoA dehydrogenase [EC:1.3.8.7]	ko00001	KEGG Orthology	M00036	Leucine degradation; leucine => acetoacetate + acetyl-CoA	1100	Metabolic pathways
K00249	ACADM, acd; acyl-CoA dehydrogenase [EC:1.3.8.7]	ko00001	KEGG Orthology	M00036	Leucine degradation; leucine => acetoacetate + acetyl-CoA	1110	Biosynthesis of secondary metabolites
K00249	ACADM, acd; acyl-CoA dehydrogenase [EC:1.3.8.7]	ko00001	KEGG Orthology	M00036	Leucine degradation; leucine => acetoacetate + acetyl-CoA	1212	Fatty acid metabolism
K00249	ACADM, acd; acyl-CoA dehydrogenase [EC:1.3.8.7]	ko00001	KEGG Orthology	M00036	Leucine degradation; leucine => acetoacetate + acetyl-CoA	3320	PPAR signaling pathway
K00249	ACADM, acd; acyl-CoA dehydrogenase [EC:1.3.8.7]	ko00001	KEGG Orthology	M00036	Leucine degradation; leucine => acetoacetate + acetyl-CoA	4936	Alcoholic liver disease
K00249	ACADM, acd; acyl-CoA dehydrogenase [EC:1.3.8.7]	ko00001	KEGG Orthology	M00087	beta-Oxidation	71	Fatty acid degradation
K00249	ACADM, acd; acyl-CoA dehydrogenase [EC:1.3.8.7]	ko00001	KEGG Orthology	M00087	beta-Oxidation	280	Valine; leucine and isoleucine degradation
K00249	ACADM, acd; acyl-CoA dehydrogenase [EC:1.3.8.7]	ko00001	KEGG Orthology	M00087	beta-Oxidation	1100	Metabolic pathways
K00249	ACADM, acd; acyl-CoA dehydrogenase [EC:1.3.8.7]	ko00001	KEGG Orthology	M00087	beta-Oxidation	1110	Biosynthesis of secondary metabolites
K00249	ACADM, acd; acyl-CoA dehydrogenase [EC:1.3.8.7]	ko00001	KEGG Orthology	M00087	beta-Oxidation	1212	Fatty acid metabolism
K00249	ACADM, acd; acyl-CoA dehydrogenase [EC:1.3.8.7]	ko00001	KEGG Orthology	M00087	beta-Oxidation	3320	PPAR signaling pathway
K00249	ACADM, acd; acyl-CoA dehydrogenase [EC:1.3.8.7]	ko00001	KEGG Orthology	M00087	beta-Oxidation	4936	Alcoholic liver disease
K00254	DHODH, pyrD; dihydroorotate dehydrogenase [EC:1.3.5.2]	ko00001	KEGG Orthology	M00051	De novo pyrimidine biosynthesis; glutamine	240	Pyrimidine metabolism
K00254	DHODH, pyrD; dihydroorotate dehydrogenase [EC:1.3.5.2]	ko00001	KEGG Orthology	M00051	De novo pyrimidine biosynthesis; glutamine	1100	Metabolic pathways
K00254	DHODH, pyrD; dihydroorotate dehydrogenase [EC:1.3.5.2]	ko00001	KEGG Orthology	M00051	De novo pyrimidine biosynthesis; glutamine	1240	Biosynthesis of cofactors
K00259	ald; alanine dehydrogenase [EC:1.4.1.1]	ko00001	KEGG Orthology	NA	NA	250	Alanine; aspartate and glutamate metabolism
K00259	ald; alanine dehydrogenase [EC:1.4.1.1]	ko00001	KEGG Orthology	NA	NA	430	Taurine and hypotaurine metabolism
K00259	ald; alanine dehydrogenase [EC:1.4.1.1]	ko00001	KEGG Orthology	NA	NA	1100	Metabolic pathways
K00260	gudB, rocG; glutamate dehydrogenase [EC:1.4.1.2]	ko00001	KEGG Orthology	NA	NA	220	Arginine biosynthesis
K00260	gudB, rocG; glutamate dehydrogenase [EC:1.4.1.2]	ko00001	KEGG Orthology	NA	NA	250	Alanine; aspartate and glutamate metabolism
K00260	gudB, rocG; glutamate dehydrogenase [EC:1.4.1.2]	ko00001	KEGG Orthology	NA	NA	430	Taurine and hypotaurine metabolism
K00260	gudB, rocG; glutamate dehydrogenase [EC:1.4.1.2]	ko00001	KEGG Orthology	NA	NA	910	Nitrogen metabolism
K00260	gudB, rocG; glutamate dehydrogenase [EC:1.4.1.2]	ko00001	KEGG Orthology	NA	NA	1100	Metabolic pathways
K00260	gudB, rocG; glutamate dehydrogenase [EC:1.4.1.2]	ko00001	KEGG Orthology	NA	NA	1120	Microbial metabolism in diverse environments
K00261	GLUD1_2, gdhA; glutamate dehydrogenase [EC:1.4.1.3]	ko00001	KEGG Orthology	M00740	Methylaspartate cycle	220	Arginine biosynthesis
K00261	GLUD1_2, gdhA; glutamate dehydrogenase [EC:1.4.1.3]	ko00001	KEGG Orthology	M00740	Methylaspartate cycle	250	Alanine; aspartate and glutamate metabolism
K00261	GLUD1_2, gdhA; glutamate dehydrogenase [EC:1.4.1.3]	ko00001	KEGG Orthology	M00740	Methylaspartate cycle	910	Nitrogen metabolism
K00261	GLUD1_2, gdhA; glutamate dehydrogenase [EC:1.4.1.3]	ko00001	KEGG Orthology	M00740	Methylaspartate cycle	1100	Metabolic pathways
K00261	GLUD1_2, gdhA; glutamate dehydrogenase [EC:1.4.1.3]	ko00001	KEGG Orthology	M00740	Methylaspartate cycle	1120	Microbial metabolism in diverse environments
K00261	GLUD1_2, gdhA; glutamate dehydrogenase [EC:1.4.1.3]	ko00001	KEGG Orthology	M00740	Methylaspartate cycle	1200	Carbon metabolism
K00261	GLUD1_2, gdhA; glutamate dehydrogenase [EC:1.4.1.3]	ko00001	KEGG Orthology	M00740	Methylaspartate cycle	4217	Necroptosis
K00261	GLUD1_2, gdhA; glutamate dehydrogenase [EC:1.4.1.3]	ko00001	KEGG Orthology	M00740	Methylaspartate cycle	4964	Proximal tubule bicarbonate reclamation
K00262	E1.4.1.4, gdhA; glutamate dehydrogenase [EC:1.4.1.4]	ko00001	KEGG Orthology	NA	NA	220	Arginine biosynthesis
K00262	E1.4.1.4, gdhA; glutamate dehydrogenase [EC:1.4.1.4]	ko00001	KEGG Orthology	NA	NA	250	Alanine; aspartate and glutamate metabolism
K00262	E1.4.1.4, gdhA; glutamate dehydrogenase [EC:1.4.1.4]	ko00001	KEGG Orthology	NA	NA	910	Nitrogen metabolism
K00262	E1.4.1.4, gdhA; glutamate dehydrogenase [EC:1.4.1.4]	ko00001	KEGG Orthology	NA	NA	1100	Metabolic pathways
K00262	E1.4.1.4, gdhA; glutamate dehydrogenase [EC:1.4.1.4]	ko00001	KEGG Orthology	NA	NA	1120	Microbial metabolism in diverse environments
K00263	E1.4.1.9; leucine dehydrogenase [EC:1.4.1.9]	ko00001	KEGG Orthology	NA	NA	280	Valine; leucine and isoleucine degradation
K00263	E1.4.1.9; leucine dehydrogenase [EC:1.4.1.9]	ko00001	KEGG Orthology	NA	NA	290	Valine; leucine and isoleucine biosynthesis
K00263	E1.4.1.9; leucine dehydrogenase [EC:1.4.1.9]	ko00001	KEGG Orthology	NA	NA	1100	Metabolic pathways
K00263	E1.4.1.9; leucine dehydrogenase [EC:1.4.1.9]	ko00001	KEGG Orthology	NA	NA	1110	Biosynthesis of secondary metabolites
K00265	gltB; glutamate synthase large chain [EC:1.4.1.13]	ko00001	KEGG Orthology	NA	NA	250	Alanine; aspartate and glutamate metabolism
K00265	gltB; glutamate synthase large chain [EC:1.4.1.13]	ko00001	KEGG Orthology	NA	NA	910	Nitrogen metabolism
K00265	gltB; glutamate synthase large chain [EC:1.4.1.13]	ko00001	KEGG Orthology	NA	NA	1100	Metabolic pathways
K00265	gltB; glutamate synthase large chain [EC:1.4.1.13]	ko00001	KEGG Orthology	NA	NA	1110	Biosynthesis of secondary metabolites
K00265	gltB; glutamate synthase large chain [EC:1.4.1.13]	ko00001	KEGG Orthology	NA	NA	1120	Microbial metabolism in diverse environments
K00265	gltB; glutamate synthase large chain [EC:1.4.1.13]	ko00001	KEGG Orthology	NA	NA	1230	Biosynthesis of amino acids
K00266	gltD; glutamate synthase small chain [EC:1.4.1.13]	ko00001	KEGG Orthology	NA	NA	250	Alanine; aspartate and glutamate metabolism
K00266	gltD; glutamate synthase small chain [EC:1.4.1.13]	ko00001	KEGG Orthology	NA	NA	910	Nitrogen metabolism
K00266	gltD; glutamate synthase small chain [EC:1.4.1.13]	ko00001	KEGG Orthology	NA	NA	1100	Metabolic pathways
K00266	gltD; glutamate synthase small chain [EC:1.4.1.13]	ko00001	KEGG Orthology	NA	NA	1110	Biosynthesis of secondary metabolites
K00266	gltD; glutamate synthase small chain [EC:1.4.1.13]	ko00001	KEGG Orthology	NA	NA	1120	Microbial metabolism in diverse environments
K00266	gltD; glutamate synthase small chain [EC:1.4.1.13]	ko00001	KEGG Orthology	NA	NA	1230	Biosynthesis of amino acids
K00275	pdxH, PNPO; pyridoxamine 5-phosphate oxidase [EC:1.4.3.5]	ko00001	KEGG Orthology	M00124	Pyridoxal-P biosynthesis; erythrose-4P => pyridoxal-P	750	Vitamin B6 metabolism
K00275	pdxH, PNPO; pyridoxamine 5-phosphate oxidase [EC:1.4.3.5]	ko00001	KEGG Orthology	M00124	Pyridoxal-P biosynthesis; erythrose-4P => pyridoxal-P	1100	Metabolic pathways
K00275	pdxH, PNPO; pyridoxamine 5-phosphate oxidase [EC:1.4.3.5]	ko00001	KEGG Orthology	M00124	Pyridoxal-P biosynthesis; erythrose-4P => pyridoxal-P	1120	Microbial metabolism in diverse environments
K00275	pdxH, PNPO; pyridoxamine 5-phosphate oxidase [EC:1.4.3.5]	ko00001	KEGG Orthology	M00124	Pyridoxal-P biosynthesis; erythrose-4P => pyridoxal-P	1240	Biosynthesis of cofactors
K00276	AOC3, AOC2, tynA; primary-amine oxidase [EC:1.4.3.21]	ko00001	KEGG Orthology	NA	NA	260	Glycine; serine and threonine metabolism
K00276	AOC3, AOC2, tynA; primary-amine oxidase [EC:1.4.3.21]	ko00001	KEGG Orthology	NA	NA	350	Tyrosine metabolism
K00276	AOC3, AOC2, tynA; primary-amine oxidase [EC:1.4.3.21]	ko00001	KEGG Orthology	NA	NA	360	Phenylalanine metabolism
K00276	AOC3, AOC2, tynA; primary-amine oxidase [EC:1.4.3.21]	ko00001	KEGG Orthology	NA	NA	410	beta-Alanine metabolism
K00276	AOC3, AOC2, tynA; primary-amine oxidase [EC:1.4.3.21]	ko00001	KEGG Orthology	NA	NA	950	Isoquinoline alkaloid biosynthesis
K00276	AOC3, AOC2, tynA; primary-amine oxidase [EC:1.4.3.21]	ko00001	KEGG Orthology	NA	NA	960	Tropane; piperidine and pyridine alkaloid biosynthesis
K00276	AOC3, AOC2, tynA; primary-amine oxidase [EC:1.4.3.21]	ko00001	KEGG Orthology	NA	NA	1100	Metabolic pathways
K00276	AOC3, AOC2, tynA; primary-amine oxidase [EC:1.4.3.21]	ko00001	KEGG Orthology	NA	NA	1110	Biosynthesis of secondary metabolites
K00278	nadB; L-aspartate oxidase [EC:1.4.3.16]	ko00001	KEGG Orthology	M00115	NAD biosynthesis; aspartate => quinolinate => NAD	250	Alanine; aspartate and glutamate metabolism
K00278	nadB; L-aspartate oxidase [EC:1.4.3.16]	ko00001	KEGG Orthology	M00115	NAD biosynthesis; aspartate => quinolinate => NAD	760	Nicotinate and nicotinamide metabolism
K00278	nadB; L-aspartate oxidase [EC:1.4.3.16]	ko00001	KEGG Orthology	M00115	NAD biosynthesis; aspartate => quinolinate => NAD	1100	Metabolic pathways
K00278	nadB; L-aspartate oxidase [EC:1.4.3.16]	ko00001	KEGG Orthology	M00115	NAD biosynthesis; aspartate => quinolinate => NAD	1240	Biosynthesis of cofactors
K00280	LOXL2_3_4; lysyl oxidase-like protein 2/3/4 [EC:1.4.3.-]	ko00001	KEGG Orthology	NA	NA	NA	NA
K00281	GLDC, gcvP; glycine cleavage system P protein [EC:1.4.4.2]	ko00001	KEGG Orthology	M00532	Photorespiration	260	Glycine; serine and threonine metabolism
K00281	GLDC, gcvP; glycine cleavage system P protein [EC:1.4.4.2]	ko00001	KEGG Orthology	M00532	Photorespiration	630	Glyoxylate and dicarboxylate metabolism
K00281	GLDC, gcvP; glycine cleavage system P protein [EC:1.4.4.2]	ko00001	KEGG Orthology	M00532	Photorespiration	785	Lipoic acid metabolism
K00281	GLDC, gcvP; glycine cleavage system P protein [EC:1.4.4.2]	ko00001	KEGG Orthology	M00532	Photorespiration	1100	Metabolic pathways
K00281	GLDC, gcvP; glycine cleavage system P protein [EC:1.4.4.2]	ko00001	KEGG Orthology	M00532	Photorespiration	1110	Biosynthesis of secondary metabolites
K00281	GLDC, gcvP; glycine cleavage system P protein [EC:1.4.4.2]	ko00001	KEGG Orthology	M00532	Photorespiration	1200	Carbon metabolism
K00281	GLDC, gcvP; glycine cleavage system P protein [EC:1.4.4.2]	ko00001	KEGG Orthology	M00621	Glycine cleavage system	260	Glycine; serine and threonine metabolism
K00281	GLDC, gcvP; glycine cleavage system P protein [EC:1.4.4.2]	ko00001	KEGG Orthology	M00621	Glycine cleavage system	630	Glyoxylate and dicarboxylate metabolism
K00281	GLDC, gcvP; glycine cleavage system P protein [EC:1.4.4.2]	ko00001	KEGG Orthology	M00621	Glycine cleavage system	785	Lipoic acid metabolism
K00281	GLDC, gcvP; glycine cleavage system P protein [EC:1.4.4.2]	ko00001	KEGG Orthology	M00621	Glycine cleavage system	1100	Metabolic pathways
K00281	GLDC, gcvP; glycine cleavage system P protein [EC:1.4.4.2]	ko00001	KEGG Orthology	M00621	Glycine cleavage system	1110	Biosynthesis of secondary metabolites
K00281	GLDC, gcvP; glycine cleavage system P protein [EC:1.4.4.2]	ko00001	KEGG Orthology	M00621	Glycine cleavage system	1200	Carbon metabolism
K00282	gcvPA; glycine cleavage system P protein subunit 1 [EC:1.4.4.2]	ko00001	KEGG Orthology	M00621	Glycine cleavage system	260	Glycine; serine and threonine metabolism
K00282	gcvPA; glycine cleavage system P protein subunit 1 [EC:1.4.4.2]	ko00001	KEGG Orthology	M00621	Glycine cleavage system	630	Glyoxylate and dicarboxylate metabolism
K00282	gcvPA; glycine cleavage system P protein subunit 1 [EC:1.4.4.2]	ko00001	KEGG Orthology	M00621	Glycine cleavage system	785	Lipoic acid metabolism
K00282	gcvPA; glycine cleavage system P protein subunit 1 [EC:1.4.4.2]	ko00001	KEGG Orthology	M00621	Glycine cleavage system	1100	Metabolic pathways
K00282	gcvPA; glycine cleavage system P protein subunit 1 [EC:1.4.4.2]	ko00001	KEGG Orthology	M00621	Glycine cleavage system	1110	Biosynthesis of secondary metabolites
K00282	gcvPA; glycine cleavage system P protein subunit 1 [EC:1.4.4.2]	ko00001	KEGG Orthology	M00621	Glycine cleavage system	1200	Carbon metabolism
K00283	gcvPB; glycine cleavage system P protein subunit 2 [EC:1.4.4.2]	ko00001	KEGG Orthology	M00621	Glycine cleavage system	260	Glycine; serine and threonine metabolism
K00283	gcvPB; glycine cleavage system P protein subunit 2 [EC:1.4.4.2]	ko00001	KEGG Orthology	M00621	Glycine cleavage system	630	Glyoxylate and dicarboxylate metabolism
K00283	gcvPB; glycine cleavage system P protein subunit 2 [EC:1.4.4.2]	ko00001	KEGG Orthology	M00621	Glycine cleavage system	785	Lipoic acid metabolism
K00283	gcvPB; glycine cleavage system P protein subunit 2 [EC:1.4.4.2]	ko00001	KEGG Orthology	M00621	Glycine cleavage system	1100	Metabolic pathways
K00283	gcvPB; glycine cleavage system P protein subunit 2 [EC:1.4.4.2]	ko00001	KEGG Orthology	M00621	Glycine cleavage system	1110	Biosynthesis of secondary metabolites
K00283	gcvPB; glycine cleavage system P protein subunit 2 [EC:1.4.4.2]	ko00001	KEGG Orthology	M00621	Glycine cleavage system	1200	Carbon metabolism
K00285	dadA; D-amino-acid dehydrogenase [EC:1.4.5.1]	ko00001	KEGG Orthology	NA	NA	360	Phenylalanine metabolism
K00285	dadA; D-amino-acid dehydrogenase [EC:1.4.5.1]	ko00001	KEGG Orthology	NA	NA	470	D-Amino acid metabolism
K00285	dadA; D-amino-acid dehydrogenase [EC:1.4.5.1]	ko00001	KEGG Orthology	NA	NA	1100	Metabolic pathways
K00286	proC; pyrroline-5-carboxylate reductase [EC:1.5.1.2]	ko00001	KEGG Orthology	M00015	Proline biosynthesis; glutamate => proline	330	Arginine and proline metabolism
K00286	proC; pyrroline-5-carboxylate reductase [EC:1.5.1.2]	ko00001	KEGG Orthology	M00015	Proline biosynthesis; glutamate => proline	1100	Metabolic pathways
K00286	proC; pyrroline-5-carboxylate reductase [EC:1.5.1.2]	ko00001	KEGG Orthology	M00015	Proline biosynthesis; glutamate => proline	1110	Biosynthesis of secondary metabolites
K00286	proC; pyrroline-5-carboxylate reductase [EC:1.5.1.2]	ko00001	KEGG Orthology	M00015	Proline biosynthesis; glutamate => proline	1230	Biosynthesis of amino acids
K00286	proC; pyrroline-5-carboxylate reductase [EC:1.5.1.2]	ko00001	KEGG Orthology	M00972	Proline metabolism	330	Arginine and proline metabolism
K00286	proC; pyrroline-5-carboxylate reductase [EC:1.5.1.2]	ko00001	KEGG Orthology	M00972	Proline metabolism	1100	Metabolic pathways
K00286	proC; pyrroline-5-carboxylate reductase [EC:1.5.1.2]	ko00001	KEGG Orthology	M00972	Proline metabolism	1110	Biosynthesis of secondary metabolites
K00286	proC; pyrroline-5-carboxylate reductase [EC:1.5.1.2]	ko00001	KEGG Orthology	M00972	Proline metabolism	1230	Biosynthesis of amino acids
K00287	DHFR, folA; dihydrofolate reductase [EC:1.5.1.3]	ko00001	KEGG Orthology	M00126	Tetrahydrofolate biosynthesis; GTP => THF	670	One carbon pool by folate
K00287	DHFR, folA; dihydrofolate reductase [EC:1.5.1.3]	ko00001	KEGG Orthology	M00126	Tetrahydrofolate biosynthesis; GTP => THF	790	Folate biosynthesis
K00287	DHFR, folA; dihydrofolate reductase [EC:1.5.1.3]	ko00001	KEGG Orthology	M00126	Tetrahydrofolate biosynthesis; GTP => THF	1100	Metabolic pathways
K00287	DHFR, folA; dihydrofolate reductase [EC:1.5.1.3]	ko00001	KEGG Orthology	M00126	Tetrahydrofolate biosynthesis; GTP => THF	1240	Biosynthesis of cofactors
K00287	DHFR, folA; dihydrofolate reductase [EC:1.5.1.3]	ko00001	KEGG Orthology	M00126	Tetrahydrofolate biosynthesis; GTP => THF	1523	Antifolate resistance
K00287	DHFR, folA; dihydrofolate reductase [EC:1.5.1.3]	ko00001	KEGG Orthology	M00840	Tetrahydrofolate biosynthesis; mediated by ribA and trpF; GTP => THF	670	One carbon pool by folate
K00287	DHFR, folA; dihydrofolate reductase [EC:1.5.1.3]	ko00001	KEGG Orthology	M00840	Tetrahydrofolate biosynthesis; mediated by ribA and trpF; GTP => THF	790	Folate biosynthesis
K00287	DHFR, folA; dihydrofolate reductase [EC:1.5.1.3]	ko00001	KEGG Orthology	M00840	Tetrahydrofolate biosynthesis; mediated by ribA and trpF; GTP => THF	1100	Metabolic pathways
K00287	DHFR, folA; dihydrofolate reductase [EC:1.5.1.3]	ko00001	KEGG Orthology	M00840	Tetrahydrofolate biosynthesis; mediated by ribA and trpF; GTP => THF	1240	Biosynthesis of cofactors
K00287	DHFR, folA; dihydrofolate reductase [EC:1.5.1.3]	ko00001	KEGG Orthology	M00840	Tetrahydrofolate biosynthesis; mediated by ribA and trpF; GTP => THF	1523	Antifolate resistance
K00289	ALDH1L; formyltetrahydrofolate dehydrogenase [EC:1.5.1.6]	ko00001	KEGG Orthology	NA	NA	670	One carbon pool by folate
K00289	ALDH1L; formyltetrahydrofolate dehydrogenase [EC:1.5.1.6]	ko00001	KEGG Orthology	NA	NA	1100	Metabolic pathways
K00290	LYS1; saccharopine dehydrogenase [EC:1.5.1.7]	ko00001	KEGG Orthology	M00030	Lysine biosynthesis; AAA pathway; 2-oxoglutarate => 2-aminoadipate => lysine	300	Lysine biosynthesis
K00290	LYS1; saccharopine dehydrogenase [EC:1.5.1.7]	ko00001	KEGG Orthology	M00030	Lysine biosynthesis; AAA pathway; 2-oxoglutarate => 2-aminoadipate => lysine	310	Lysine degradation
K00290	LYS1; saccharopine dehydrogenase [EC:1.5.1.7]	ko00001	KEGG Orthology	M00030	Lysine biosynthesis; AAA pathway; 2-oxoglutarate => 2-aminoadipate => lysine	1100	Metabolic pathways
K00290	LYS1; saccharopine dehydrogenase [EC:1.5.1.7]	ko00001	KEGG Orthology	M00030	Lysine biosynthesis; AAA pathway; 2-oxoglutarate => 2-aminoadipate => lysine	1110	Biosynthesis of secondary metabolites
K00290	LYS1; saccharopine dehydrogenase [EC:1.5.1.7]	ko00001	KEGG Orthology	M00030	Lysine biosynthesis; AAA pathway; 2-oxoglutarate => 2-aminoadipate => lysine	1230	Biosynthesis of amino acids
K00294	E1.2.1.88; 1-pyrroline-5-carboxylate dehydrogenase [EC:1.2.1.88]	ko00001	KEGG Orthology	M00970	Proline degradation; proline => glutamate	250	Alanine; aspartate and glutamate metabolism
K00294	E1.2.1.88; 1-pyrroline-5-carboxylate dehydrogenase [EC:1.2.1.88]	ko00001	KEGG Orthology	M00970	Proline degradation; proline => glutamate	330	Arginine and proline metabolism
K00294	E1.2.1.88; 1-pyrroline-5-carboxylate dehydrogenase [EC:1.2.1.88]	ko00001	KEGG Orthology	M00970	Proline degradation; proline => glutamate	1100	Metabolic pathways
K00297	metF, MTHFR; methylenetetrahydrofolate reductase [EC:1.5.1.54]	ko00001	KEGG Orthology	M00377	Reductive acetyl-CoA pathway	670	One carbon pool by folate
K00297	metF, MTHFR; methylenetetrahydrofolate reductase [EC:1.5.1.54]	ko00001	KEGG Orthology	M00377	Reductive acetyl-CoA pathway	720	Carbon fixation pathways in prokaryotes
K00297	metF, MTHFR; methylenetetrahydrofolate reductase [EC:1.5.1.54]	ko00001	KEGG Orthology	M00377	Reductive acetyl-CoA pathway	1100	Metabolic pathways
K00297	metF, MTHFR; methylenetetrahydrofolate reductase [EC:1.5.1.54]	ko00001	KEGG Orthology	M00377	Reductive acetyl-CoA pathway	1120	Microbial metabolism in diverse environments
K00297	metF, MTHFR; methylenetetrahydrofolate reductase [EC:1.5.1.54]	ko00001	KEGG Orthology	M00377	Reductive acetyl-CoA pathway	1200	Carbon metabolism
K00298	ceo; N5-ornithine synthase [EC:1.5.1.24]	ko00001	KEGG Orthology	NA	NA	NA	NA
K00299	ssuE, msuE; FMN reductase [EC:1.5.1.38]	ko00001	KEGG Orthology	NA	NA	740	Riboflavin metabolism
K00299	ssuE, msuE; FMN reductase [EC:1.5.1.38]	ko00001	KEGG Orthology	NA	NA	920	Sulfur metabolism
K00299	ssuE, msuE; FMN reductase [EC:1.5.1.38]	ko00001	KEGG Orthology	NA	NA	1100	Metabolic pathways
K00311	ETFDH; electron-transferring-flavoprotein dehydrogenase [EC:1.5.5.1]	ko00001	KEGG Orthology	NA	NA	NA	NA
K00313	fixC; electron transfer flavoprotein-quinone oxidoreductase [EC:1.5.5.-]	ko00001	KEGG Orthology	NA	NA	NA	NA
K00318	PRODH, fadM, putB; proline dehydrogenase [EC:1.5.5.2]	ko00001	KEGG Orthology	M00970	Proline degradation; proline => glutamate	330	Arginine and proline metabolism
K00318	PRODH, fadM, putB; proline dehydrogenase [EC:1.5.5.2]	ko00001	KEGG Orthology	M00970	Proline degradation; proline => glutamate	1100	Metabolic pathways
K00318	PRODH, fadM, putB; proline dehydrogenase [EC:1.5.5.2]	ko00001	KEGG Orthology	M00970	Proline degradation; proline => glutamate	1110	Biosynthesis of secondary metabolites
K00318	PRODH, fadM, putB; proline dehydrogenase [EC:1.5.5.2]	ko00001	KEGG Orthology	M00972	Proline metabolism	330	Arginine and proline metabolism
K00318	PRODH, fadM, putB; proline dehydrogenase [EC:1.5.5.2]	ko00001	KEGG Orthology	M00972	Proline metabolism	1100	Metabolic pathways
K00318	PRODH, fadM, putB; proline dehydrogenase [EC:1.5.5.2]	ko00001	KEGG Orthology	M00972	Proline metabolism	1110	Biosynthesis of secondary metabolites
K00322	sthA, udhA; NAD transhydrogenase [EC:1.6.1.1]	ko00001	KEGG Orthology	NA	NA	760	Nicotinate and nicotinamide metabolism
K00322	sthA, udhA; NAD transhydrogenase [EC:1.6.1.1]	ko00001	KEGG Orthology	NA	NA	1100	Metabolic pathways
K00323	NNT; H+-translocating NAD transhydrogenase [EC:1.6.1.2 7.1.1.1]	ko00001	KEGG Orthology	NA	NA	760	Nicotinate and nicotinamide metabolism
K00323	NNT; H+-translocating NAD transhydrogenase [EC:1.6.1.2 7.1.1.1]	ko00001	KEGG Orthology	NA	NA	1100	Metabolic pathways
K00324	pntA; H+-translocating NAD transhydrogenase subunit alpha [EC:1.6.1.2 7.1.1.1]	ko00001	KEGG Orthology	NA	NA	760	Nicotinate and nicotinamide metabolism
K00324	pntA; H+-translocating NAD transhydrogenase subunit alpha [EC:1.6.1.2 7.1.1.1]	ko00001	KEGG Orthology	NA	NA	1100	Metabolic pathways
K00325	pntB; H+-translocating NAD transhydrogenase subunit beta [EC:1.6.1.2 7.1.1.1]	ko00001	KEGG Orthology	NA	NA	760	Nicotinate and nicotinamide metabolism
K00325	pntB; H+-translocating NAD transhydrogenase subunit beta [EC:1.6.1.2 7.1.1.1]	ko00001	KEGG Orthology	NA	NA	1100	Metabolic pathways
K00326	CYB5R; cytochrome-b5 reductase [EC:1.6.2.2]	ko00001	KEGG Orthology	NA	NA	520	Amino sugar and nucleotide sugar metabolism
K00330	nuoA; NADH-quinone oxidoreductase subunit A [EC:7.1.1.2]	ko00001	KEGG Orthology	M00144	NADH:quinone oxidoreductase; prokaryotes	190	Oxidative phosphorylation
K00330	nuoA; NADH-quinone oxidoreductase subunit A [EC:7.1.1.2]	ko00001	KEGG Orthology	M00144	NADH:quinone oxidoreductase; prokaryotes	1100	Metabolic pathways
K00331	nuoB; NADH-quinone oxidoreductase subunit B [EC:7.1.1.2]	ko00001	KEGG Orthology	M00144	NADH:quinone oxidoreductase; prokaryotes	190	Oxidative phosphorylation
K00331	nuoB; NADH-quinone oxidoreductase subunit B [EC:7.1.1.2]	ko00001	KEGG Orthology	M00144	NADH:quinone oxidoreductase; prokaryotes	1100	Metabolic pathways
K00334	nuoE; NADH-quinone oxidoreductase subunit E [EC:7.1.1.2]	ko00001	KEGG Orthology	M00144	NADH:quinone oxidoreductase; prokaryotes	190	Oxidative phosphorylation
K00334	nuoE; NADH-quinone oxidoreductase subunit E [EC:7.1.1.2]	ko00001	KEGG Orthology	M00144	NADH:quinone oxidoreductase; prokaryotes	1100	Metabolic pathways
K00335	nuoF; NADH-quinone oxidoreductase subunit F [EC:7.1.1.2]	ko00001	KEGG Orthology	M00144	NADH:quinone oxidoreductase; prokaryotes	190	Oxidative phosphorylation
K00335	nuoF; NADH-quinone oxidoreductase subunit F [EC:7.1.1.2]	ko00001	KEGG Orthology	M00144	NADH:quinone oxidoreductase; prokaryotes	1100	Metabolic pathways
K00336	nuoG; NADH-quinone oxidoreductase subunit G [EC:7.1.1.2]	ko00001	KEGG Orthology	M00144	NADH:quinone oxidoreductase; prokaryotes	190	Oxidative phosphorylation
K00336	nuoG; NADH-quinone oxidoreductase subunit G [EC:7.1.1.2]	ko00001	KEGG Orthology	M00144	NADH:quinone oxidoreductase; prokaryotes	1100	Metabolic pathways
K00337	nuoH; NADH-quinone oxidoreductase subunit H [EC:7.1.1.2]	ko00001	KEGG Orthology	M00144	NADH:quinone oxidoreductase; prokaryotes	190	Oxidative phosphorylation
K00337	nuoH; NADH-quinone oxidoreductase subunit H [EC:7.1.1.2]	ko00001	KEGG Orthology	M00144	NADH:quinone oxidoreductase; prokaryotes	1100	Metabolic pathways
K00338	nuoI; NADH-quinone oxidoreductase subunit I [EC:7.1.1.2]	ko00001	KEGG Orthology	M00144	NADH:quinone oxidoreductase; prokaryotes	190	Oxidative phosphorylation
K00338	nuoI; NADH-quinone oxidoreductase subunit I [EC:7.1.1.2]	ko00001	KEGG Orthology	M00144	NADH:quinone oxidoreductase; prokaryotes	1100	Metabolic pathways
K00339	nuoJ; NADH-quinone oxidoreductase subunit J [EC:7.1.1.2]	ko00001	KEGG Orthology	M00144	NADH:quinone oxidoreductase; prokaryotes	190	Oxidative phosphorylation
K00339	nuoJ; NADH-quinone oxidoreductase subunit J [EC:7.1.1.2]	ko00001	KEGG Orthology	M00144	NADH:quinone oxidoreductase; prokaryotes	1100	Metabolic pathways
K00340	nuoK; NADH-quinone oxidoreductase subunit K [EC:7.1.1.2]	ko00001	KEGG Orthology	M00144	NADH:quinone oxidoreductase; prokaryotes	190	Oxidative phosphorylation
K00340	nuoK; NADH-quinone oxidoreductase subunit K [EC:7.1.1.2]	ko00001	KEGG Orthology	M00144	NADH:quinone oxidoreductase; prokaryotes	1100	Metabolic pathways
K00341	nuoL; NADH-quinone oxidoreductase subunit L [EC:7.1.1.2]	ko00001	KEGG Orthology	M00144	NADH:quinone oxidoreductase; prokaryotes	190	Oxidative phosphorylation
K00341	nuoL; NADH-quinone oxidoreductase subunit L [EC:7.1.1.2]	ko00001	KEGG Orthology	M00144	NADH:quinone oxidoreductase; prokaryotes	1100	Metabolic pathways
K00342	nuoM; NADH-quinone oxidoreductase subunit M [EC:7.1.1.2]	ko00001	KEGG Orthology	M00144	NADH:quinone oxidoreductase; prokaryotes	190	Oxidative phosphorylation
K00342	nuoM; NADH-quinone oxidoreductase subunit M [EC:7.1.1.2]	ko00001	KEGG Orthology	M00144	NADH:quinone oxidoreductase; prokaryotes	1100	Metabolic pathways
K00343	nuoN; NADH-quinone oxidoreductase subunit N [EC:7.1.1.2]	ko00001	KEGG Orthology	M00144	NADH:quinone oxidoreductase; prokaryotes	190	Oxidative phosphorylation
K00343	nuoN; NADH-quinone oxidoreductase subunit N [EC:7.1.1.2]	ko00001	KEGG Orthology	M00144	NADH:quinone oxidoreductase; prokaryotes	1100	Metabolic pathways
K00344	qor, CRYZ; NADPH:quinone reductase [EC:1.6.5.5]	ko00001	KEGG Orthology	NA	NA	NA	NA
K00346	nqrA; Na+-transporting NADH:ubiquinone oxidoreductase subunit A [EC:7.2.1.1]	ko00001	KEGG Orthology	NA	NA	NA	NA
K00347	nqrB; Na+-transporting NADH:ubiquinone oxidoreductase subunit B [EC:7.2.1.1]	ko00001	KEGG Orthology	NA	NA	NA	NA
K00348	nqrC; Na+-transporting NADH:ubiquinone oxidoreductase subunit C [EC:7.2.1.1]	ko00001	KEGG Orthology	NA	NA	NA	NA
K00349	nqrD; Na+-transporting NADH:ubiquinone oxidoreductase subunit D [EC:7.2.1.1]	ko00001	KEGG Orthology	NA	NA	NA	NA
K00350	nqrE; Na+-transporting NADH:ubiquinone oxidoreductase subunit E [EC:7.2.1.1]	ko00001	KEGG Orthology	NA	NA	NA	NA
K00351	nqrF; Na+-transporting NADH:ubiquinone oxidoreductase subunit F [EC:7.2.1.1]	ko00001	KEGG Orthology	NA	NA	NA	NA
K00354	E1.6.99.1; NADPH2 dehydrogenase [EC:1.6.99.1]	ko00001	KEGG Orthology	NA	NA	NA	NA
K00355	NQO1; NAD [EC:1.6.5.2]	ko00001	KEGG Orthology	NA	NA	130	Ubiquinone and other terpenoid-quinone biosynthesis
K00355	NQO1; NAD [EC:1.6.5.2]	ko00001	KEGG Orthology	NA	NA	1100	Metabolic pathways
K00355	NQO1; NAD [EC:1.6.5.2]	ko00001	KEGG Orthology	NA	NA	1110	Biosynthesis of secondary metabolites
K00355	NQO1; NAD [EC:1.6.5.2]	ko00001	KEGG Orthology	NA	NA	1240	Biosynthesis of cofactors
K00355	NQO1; NAD [EC:1.6.5.2]	ko00001	KEGG Orthology	NA	NA	5200	Pathways in cancer
K00355	NQO1; NAD [EC:1.6.5.2]	ko00001	KEGG Orthology	NA	NA	5208	Chemical carcinogenesis - reactive oxygen species
K00355	NQO1; NAD [EC:1.6.5.2]	ko00001	KEGG Orthology	NA	NA	5225	Hepatocellular carcinoma
K00355	NQO1; NAD [EC:1.6.5.2]	ko00001	KEGG Orthology	NA	NA	5418	Fluid shear stress and atherosclerosis
K00357	QDPR; dihydropteridine reductase [EC:1.5.1.34]	ko00001	KEGG Orthology	NA	NA	790	Folate biosynthesis
K00357	QDPR; dihydropteridine reductase [EC:1.5.1.34]	ko00001	KEGG Orthology	NA	NA	1100	Metabolic pathways
K00362	nirB; nitrite reductase large subunit [EC:1.7.1.15]	ko00001	KEGG Orthology	M00530	Dissimilatory nitrate reduction; nitrate => ammonia	910	Nitrogen metabolism
K00362	nirB; nitrite reductase large subunit [EC:1.7.1.15]	ko00001	KEGG Orthology	M00530	Dissimilatory nitrate reduction; nitrate => ammonia	1100	Metabolic pathways
K00362	nirB; nitrite reductase large subunit [EC:1.7.1.15]	ko00001	KEGG Orthology	M00530	Dissimilatory nitrate reduction; nitrate => ammonia	1120	Microbial metabolism in diverse environments
K00363	nirD; nitrite reductase small subunit [EC:1.7.1.15]	ko00001	KEGG Orthology	M00530	Dissimilatory nitrate reduction; nitrate => ammonia	910	Nitrogen metabolism
K00363	nirD; nitrite reductase small subunit [EC:1.7.1.15]	ko00001	KEGG Orthology	M00530	Dissimilatory nitrate reduction; nitrate => ammonia	1100	Metabolic pathways
K00363	nirD; nitrite reductase small subunit [EC:1.7.1.15]	ko00001	KEGG Orthology	M00530	Dissimilatory nitrate reduction; nitrate => ammonia	1120	Microbial metabolism in diverse environments
K00364	guaC, GMPR; GMP reductase [EC:1.7.1.7]	ko00001	KEGG Orthology	NA	NA	230	Purine metabolism
K00364	guaC, GMPR; GMP reductase [EC:1.7.1.7]	ko00001	KEGG Orthology	NA	NA	1100	Metabolic pathways
K00364	guaC, GMPR; GMP reductase [EC:1.7.1.7]	ko00001	KEGG Orthology	NA	NA	1232	Nucleotide metabolism
K00366	nirA; ferredoxin-nitrite reductase [EC:1.7.7.1]	ko00001	KEGG Orthology	M00531	Assimilatory nitrate reduction; nitrate => ammonia	910	Nitrogen metabolism
K00366	nirA; ferredoxin-nitrite reductase [EC:1.7.7.1]	ko00001	KEGG Orthology	M00531	Assimilatory nitrate reduction; nitrate => ammonia	1100	Metabolic pathways
K00366	nirA; ferredoxin-nitrite reductase [EC:1.7.7.1]	ko00001	KEGG Orthology	M00531	Assimilatory nitrate reduction; nitrate => ammonia	1120	Microbial metabolism in diverse environments
K00370	narG, narZ, nxrA; nitrate reductase / nitrite oxidoreductase, alpha subunit [EC:1.7.5.1 1.7.99.-]	ko00001	KEGG Orthology	M00529	Denitrification; nitrate => nitrogen	910	Nitrogen metabolism
K00370	narG, narZ, nxrA; nitrate reductase / nitrite oxidoreductase, alpha subunit [EC:1.7.5.1 1.7.99.-]	ko00001	KEGG Orthology	M00529	Denitrification; nitrate => nitrogen	1100	Metabolic pathways
K00370	narG, narZ, nxrA; nitrate reductase / nitrite oxidoreductase, alpha subunit [EC:1.7.5.1 1.7.99.-]	ko00001	KEGG Orthology	M00529	Denitrification; nitrate => nitrogen	1120	Microbial metabolism in diverse environments
K00370	narG, narZ, nxrA; nitrate reductase / nitrite oxidoreductase, alpha subunit [EC:1.7.5.1 1.7.99.-]	ko00001	KEGG Orthology	M00529	Denitrification; nitrate => nitrogen	2020	Two-component system
K00370	narG, narZ, nxrA; nitrate reductase / nitrite oxidoreductase, alpha subunit [EC:1.7.5.1 1.7.99.-]	ko00001	KEGG Orthology	M00530	Dissimilatory nitrate reduction; nitrate => ammonia	910	Nitrogen metabolism
K00370	narG, narZ, nxrA; nitrate reductase / nitrite oxidoreductase, alpha subunit [EC:1.7.5.1 1.7.99.-]	ko00001	KEGG Orthology	M00530	Dissimilatory nitrate reduction; nitrate => ammonia	1100	Metabolic pathways
K00370	narG, narZ, nxrA; nitrate reductase / nitrite oxidoreductase, alpha subunit [EC:1.7.5.1 1.7.99.-]	ko00001	KEGG Orthology	M00530	Dissimilatory nitrate reduction; nitrate => ammonia	1120	Microbial metabolism in diverse environments
K00370	narG, narZ, nxrA; nitrate reductase / nitrite oxidoreductase, alpha subunit [EC:1.7.5.1 1.7.99.-]	ko00001	KEGG Orthology	M00530	Dissimilatory nitrate reduction; nitrate => ammonia	2020	Two-component system
K00370	narG, narZ, nxrA; nitrate reductase / nitrite oxidoreductase, alpha subunit [EC:1.7.5.1 1.7.99.-]	ko00001	KEGG Orthology	M00804	Complete nitrification; comammox; ammonia => nitrite => nitrate	910	Nitrogen metabolism
K00370	narG, narZ, nxrA; nitrate reductase / nitrite oxidoreductase, alpha subunit [EC:1.7.5.1 1.7.99.-]	ko00001	KEGG Orthology	M00804	Complete nitrification; comammox; ammonia => nitrite => nitrate	1100	Metabolic pathways
K00370	narG, narZ, nxrA; nitrate reductase / nitrite oxidoreductase, alpha subunit [EC:1.7.5.1 1.7.99.-]	ko00001	KEGG Orthology	M00804	Complete nitrification; comammox; ammonia => nitrite => nitrate	1120	Microbial metabolism in diverse environments
K00370	narG, narZ, nxrA; nitrate reductase / nitrite oxidoreductase, alpha subunit [EC:1.7.5.1 1.7.99.-]	ko00001	KEGG Orthology	M00804	Complete nitrification; comammox; ammonia => nitrite => nitrate	2020	Two-component system
K00371	narH, narY, nxrB; nitrate reductase / nitrite oxidoreductase, beta subunit [EC:1.7.5.1 1.7.99.-]	ko00001	KEGG Orthology	M00529	Denitrification; nitrate => nitrogen	910	Nitrogen metabolism
K00371	narH, narY, nxrB; nitrate reductase / nitrite oxidoreductase, beta subunit [EC:1.7.5.1 1.7.99.-]	ko00001	KEGG Orthology	M00529	Denitrification; nitrate => nitrogen	1100	Metabolic pathways
K00371	narH, narY, nxrB; nitrate reductase / nitrite oxidoreductase, beta subunit [EC:1.7.5.1 1.7.99.-]	ko00001	KEGG Orthology	M00529	Denitrification; nitrate => nitrogen	1120	Microbial metabolism in diverse environments
K00371	narH, narY, nxrB; nitrate reductase / nitrite oxidoreductase, beta subunit [EC:1.7.5.1 1.7.99.-]	ko00001	KEGG Orthology	M00529	Denitrification; nitrate => nitrogen	2020	Two-component system
[truncated: 37,331 more rows]
